# Supplementary material for: Epigenetic imprinting of infant immunity by prenatal SARS-CoV-2
Source: Research Square preprint supplement (doi:10.21203/rs.3.rs-8150998/v1), 2025-12-12
Supplement: Supplementary file 1 [file 054b6faea30a3c32226a53ad.xlsx]

## Sheet: Summary
Table	Description
scATAC-seq_Sample_Information	Sample information and analysis outcome of scATAC-seq datasets
Full_DA_Peak_List_CM_vs_HM	Full list of DA peaks between CM vs HM
Full_DA_Peak_List_CB1_vs_HB1	Full list of DA peaks between CB1 vs HB1
Full_DA_Peak_List_CB3_vs_HB3	Full list of DA peaks between CB3 vs HB3
CD14+_Mono_3Mths_vs_Birth	List of DA peaks between infants at 3Mths vs Birth in CD14+ monocytes
Enriched_GO_CD4_CD8_TN_DA_Peak	GO enrichment results of genes annotated to DA peaks in CD4+ and CD8+ TN, respectively
Enriched_GO_CD14+_Mono	GO enrichment results of genes annotated to DA peaks between infants at 3Mths vs Birth in CD14+ monocytes
Diff_Motif_List_CM_vs_HM	Full list of differential motifs between CM vs HM
Diff_Motif_List_CB1_vs_HB1	Full list of differential motifs between CB1 vs HB1
Diff_Motif_List_CB3_vs_HB3	Full list of differential motifs between CB3 vs HB3

## Sheet: scATAC-seq_Sample_Information
Sample	Dyad ID	Dyad Group	Subject/Time Point	Group	# Reads	# Cells	# Cells Post Filtering	# Cells Annotated	1 - Erythorid	2 - MKs	3 - HSPCs	4 - Mono	5 - B cells	6 - NK + T	7 - pDCs
CS03-M	CS03	COVID-19	Mother	CM	216296554	3847	3226	3159	0	17	2	248	101	2780	11
CS06-M	CS06	COVID-19	Mother	CM	174913938	5830	5311	5246	0	19	2	549	551	4120	5
CS07-M	CS07	COVID-19	Mother	CM	111435470	5314	995	978	0	0	0	231	449	298	0
CS08-M	CS08	COVID-19	Mother	CM	166720439	4284	3892	3736	0	6	6	1393	385	1938	8
CT01-M	CT01	Control	Mother	HM	114586301	2847	2839	2782	0	0	4	1442	231	1092	13
CT02-M	CT02	Control	Mother	HM	178178123	4053	3778	3742	0	1	8	318	378	3018	19
CT03-M	CT03	Control	Mother	HM	145956864	3272	2990	2922	0	0	2	158	151	2604	7
CT05-M	CT05	Control	Mother	HM	137640548	3330	332	319	0	0	0	22	81	216	0
CT09-M	CT09	Control	Mother	HM	161163697	7303	7116	7052	1	10	4	1746	621	4630	40
CS03-B1	CS03	COVID-19	Infant (Birth)	CB1	215053705	4756	4215	4165	2	2	16	340	276	3514	15
CS06-B1	CS06	COVID-19	Infant (Birth)	CB1	174562571	3583	3336	3236	77	5	37	324	411	2370	12
CS07-B1	CS07	COVID-19	Infant (Birth)	CB1	105115390	5315	1200	1156	15	1	1	465	104	566	4
CS08-B1	CS08	COVID-19	Infant (Birth)	CB1	243518330	3129	2315	2274	3	6	14	795	394	1048	14
CT01-B1	CT01	Control	Infant (Birth)	HB1	199154718	2594	1117	1110	0	0	9	304	311	479	7
CT02-B1	CT02	Control	Infant (Birth)	HB1	161439094	5731	4832	4772	1	8	31	631	447	3647	7
CT03-B1	CT03	Control	Infant (Birth)	HB1	151582413	2948	2242	2132	0	0	2	767	135	1208	20
CT05-B1	CT05	Control	Infant (Birth)	HB1	109236929	5104	2078	2017	13	5	57	724	224	958	36
CT09-B1	CT09	Control	Infant (Birth)	HB1	173263347	2692	2594	2537	1	15	10	514	386	1590	21
CS03-B3	CS03	COVID-19	Infant (3Mths)	CB3	67046472	2284	2049	2030	0	0	0	81	276	1665	8
CS06-B3	CS06	COVID-19	Infant (3Mths)	CB3	166867420	4377	3883	3861	0	7	1	321	1394	2120	18
CS07-B3	CS07	COVID-19	Infant (3Mths)	CB3	113244556	4982	3198	3164	0	1	0	74	1009	2076	4
CS08-B3	CS08	COVID-19	Infant (3Mths)	CB3	148027982	1378	714	704	1	0	0	51	118	533	1
CT01-B3	CT01	Control	Infant (3Mths)	HB3	148874804	4858	4587	4552	1	4	1	226	2117	2195	8
CT02-B3	CT02	Control	Infant (3Mths)	HB3	214223600	3555	3170	3131	0	4	4	339	735	2038	11
CT03-B3	CT03	Control	Infant (3Mths)	HB3	153992448	4536	4031	3917	0	0	2	939	771	2187	18
CT05-B3	CT05	Control	Infant (3Mths)	HB3	132748947	4158	1645	1626	0	0	2	27	648	948	1
CT09-B3	CT09	Control	Infant (3Mths)	HB3	126469814	6547	6326	6283	0	19	10	682	1870	3646	56
				Total	4211314474	112607	84011	82603	115	130	225	13711	14574	53484	364
				Average	1.55975e+08	4170.63	3111.52	3059.37	4.25926	4.81481	8.33333	507.815	539.778	1980.89	13.4815

## Sheet: Full_DA_Peak_List_CM_vs_HM
comparison_group	major_cell_type	minor_cell_type	peak_name	tx_id	gene_name	gene_id	gene_biotype	type	closest_region	distance	p_val	avg_log2FC	pct.1	pct.2	p_val_adj	trend
CM vs HM	4 - Mono	4a - CD14+ Mono	chr2-241619513-241621148	ENST00000612200	THAP4	ENSG00000176946	protein_coding	gap	chr2-241606474-241632916	0	8.33105e-45	0.206475	0.047	0.008	1.72365e-39	open
CM vs HM	4 - Mono	4a - CD14+ Mono	chr7-38348946-38350474	ENST00000609522	RP11-121A8.1	ENSG00000272908	lincRNA	exon	chr7-38329240-38329643	19302	6.06043e-43	-0.465546	0.029	0.192	1.25387e-37	closed
CM vs HM	4 - Mono	4a - CD14+ Mono	chr3-93470147-93471082	ENST00000394236	PROS1	ENSG00000184500	protein_coding	utr	chr3-93873033-93874244	401950	2.8751e-38	0.199853	0.363	0.321	5.94844e-33	open
CM vs HM	4 - Mono	4a - CD14+ Mono	chr8-8227498-8228922	ENST00000594215	RP11-556O5.6	ENSG00000268955	lincRNA	exon	chr8-8188535-8189195	38302	6.71423e-35	-0.357432	0.163	0.348	1.38914e-29	closed
CM vs HM	4 - Mono	4a - CD14+ Mono	chr10-29803609-29804807	ENST00000465422	SVIL	ENSG00000197321	protein_coding	exon	chr10-29736685-29736781	66827	1.00389e-33	0.260987	0.064	0.015	2.077e-28	open
CM vs HM	4 - Mono	4a - CD14+ Mono	chr3-72338720-72339801	ENST00000570082	RP11-447M4.1	ENSG00000260670	lincRNA	exon	chr3-72321051-72324027	14692	4.21803e-33	0.216731	0.084	0.03	8.72689e-28	open
CM vs HM	4 - Mono	4a - CD14+ Mono	chr17-36196290-36197508	ENST00000619989	CCL3L3	ENSG00000276085	protein_coding	cds	chr17-36196598-36196673	0	1.21913e-31	-0.425444	0.127	0.356	2.52231e-26	closed
CM vs HM	4 - Mono	4a - CD14+ Mono	chr16-46390070-46390989	ENST00000303383	SHCBP1	ENSG00000171241	protein_coding	utr	chr16-46580554-46581728	189564	1.4491e-29	0.27801	0.138	0.06	2.99812e-24	open
CM vs HM	4 - Mono	4a - CD14+ Mono	chr11-110934509-110935564	ENST00000363298	RNA5SP350	ENSG00000200168	rRNA	exon	chr11-111040098-111040208	104533	4.08414e-29	-0.389727	0.006	0.083	8.44988e-24	closed
CM vs HM	4 - Mono	4a - CD14+ Mono	chr3-195954076-195955099	ENST00000570130	RP11-480A16.1	ENSG00000260261	lincRNA	exon	chr3-195949188-195952695	1380	2.60136e-27	0.168316	0.037	0.008	5.38209e-22	open
CM vs HM	4 - Mono	4a - CD14+ Mono	chr15-89428839-89429820	ENST00000536780	MIR9-3HG	ENSG00000255571	lincRNA	exon	chr15-89395028-89398487	30351	1.02637e-26	0.187146	0.039	0.008	2.12351e-21	open
CM vs HM	4 - Mono	4a - CD14+ Mono	chr22-42680158-42681261	ENST00000401850	A4GALT	ENSG00000128274	protein_coding	utr	chr22-42692121-42692889	10859	2.47079e-25	0.16833	0.04	0.012	5.11195e-20	open
CM vs HM	4 - Mono	4a - CD14+ Mono	chr3-131361062-131362454	ENST00000513905	RP11-933H2.4	ENSG00000250608	processed_transcript	gap	chr3-131330868-131361565	0	2.49355e-25	0.260659	0.214	0.142	5.15904e-20	open
CM vs HM	4 - Mono	4a - CD14+ Mono	chr16-82111871-82112878	ENST00000566838	HSD17B2	ENSG00000086696	protein_coding	utr	chr16-82091177-82098534	13336	3.87856e-24	0.202629	0.027	0.001	8.02455e-19	open
CM vs HM	4 - Mono	4a - CD14+ Mono	chr17-36188618-36189603	ENST00000619989	CCL3L3	ENSG00000276085	protein_coding	utr	chr17-36194869-36195285	5265	1.33241e-23	-0.377013	0.092	0.271	2.75669e-18	closed
CM vs HM	4 - Mono	4a - CD14+ Mono	chr17-43360572-43361558	ENST00000341011	LINC00910	ENSG00000188825	lincRNA	exon	chr17-43369845-43371039	8286	1.65383e-23	0.134079	0.384	0.377	3.4217e-18	open
CM vs HM	4 - Mono	4a - CD14+ Mono	chr2-96556583-96557599	ENST00000357485	ARID5A	ENSG00000196843	protein_coding	utr	chr2-96552314-96552638	3944	1.89837e-23	0.136996	0.054	0.026	3.92763e-18	open
CM vs HM	4 - Mono	4a - CD14+ Mono	chr19-43438870-43439906	ENST00000602198	TEX101	ENSG00000131126	protein_coding	utr	chr19-43418398-43418597	20272	5.40575e-23	0.137112	0.054	0.026	1.11842e-17	open
CM vs HM	4 - Mono	4a - CD14+ Mono	chr9-127838062-127839305	ENST00000480266	ENG	ENSG00000106991	protein_coding	gap	chr9-127829828-127843093	0	1.53806e-22	0.143828	0.071	0.039	3.18217e-17	open
CM vs HM	4 - Mono	4a - CD14+ Mono	chr2-123073072-123074063	ENST00000432894	AC062020.1	ENSG00000232740	lincRNA	gap	chr2-123070365-123073151	0	2.9059e-22	0.163206	0.029	0.004	6.01216e-17	open
CM vs HM	4 - Mono	4a - CD14+ Mono	chr10-78977605-78978640	ENST00000427035	RP11-481G8.2	ENSG00000229569	lincRNA	exon	chr10-79000484-79002236	21843	5.26613e-22	0.176367	0.071	0.035	1.08954e-16	open
CM vs HM	4 - Mono	4a - CD14+ Mono	GL000219.1-42149-43319	NA	NA	NA	NA	NA	NA	NA	9.32091e-22	0.18206	0.119	0.075	1.92845e-16	open
CM vs HM	4 - Mono	4a - CD14+ Mono	chr19-54316490-54317725	ENST00000616950	AC008984.2	ENSG00000275210	processed_transcript	gap	chr19-54312622-54320419	0	1.6102e-21	-0.359598	0.044	0.172	3.33143e-16	closed
CM vs HM	4 - Mono	4a - CD14+ Mono	chr12-108856093-108856977	ENST00000551165	SSH1	ENSG00000084112	protein_coding	gap	chr12-108852679-108857427	0	4.2094e-21	0.12144	0.093	0.064	8.70905e-16	open
CM vs HM	4 - Mono	4a - CD14+ Mono	chr10-132665762-132666602	ENST00000423490	INPP5A	ENSG00000068383	protein_coding	gap	chr10-132607957-132690391	0	7.11959e-21	0.140326	0.031	0.008	1.47301e-15	open
CM vs HM	4 - Mono	4a - CD14+ Mono	chr11-35334083-35335296	ENST00000606205	SLC1A2	ENSG00000110436	protein_coding	gap	chr11-35317517-35418949	0	7.94019e-21	0.179899	0.058	0.023	1.64279e-15	open
CM vs HM	4 - Mono	4a - CD14+ Mono	chr1-52636820-52637835	ENST00000517870	FAM159A	ENSG00000182183	protein_coding	gap	chr1-52633676-52642862	0	5.96942e-20	0.137971	0.172	0.134	1.23504e-14	open
CM vs HM	4 - Mono	4a - CD14+ Mono	chr7-155290799-155291816	ENST00000609974	AC144652.1	ENSG00000273117	lincRNA	exon	chr7-155295918-155297541	4101	1.0018e-19	0.15004	0.056	0.026	2.07268e-14	open
CM vs HM	4 - Mono	4a - CD14+ Mono	chr9-34991582-34992972	ENST00000443266	DNAJB5	ENSG00000137094	protein_coding	utr	chr9-34992872-34992986	0	1.04779e-19	0.108189	0.049	0.027	2.16782e-14	open
CM vs HM	4 - Mono	4a - CD14+ Mono	chr1-224623530-224624509	ENST00000498382	CNIH3	ENSG00000143786	protein_coding	gap	chr1-224529421-224680957	0	1.0904e-19	0.0928643	0.024	0.01	2.25598e-14	open
CM vs HM	4 - Mono	4a - CD14+ Mono	chr1-221839234-221840478	ENST00000431729	RP11-191N8.2	ENSG00000227925	lincRNA	gap	chr1-221840454-221840535	0	1.94243e-19	0.109874	0.024	0.006	4.01879e-14	open
CM vs HM	4 - Mono	4a - CD14+ Mono	chr16-57628120-57629136	ENST00000568979	ADGRG1	ENSG00000205336	protein_coding	utr	chr16-57628690-57628802	0	2.11768e-19	0.108697	0.036	0.016	4.38138e-14	open
CM vs HM	4 - Mono	4a - CD14+ Mono	chr13-48892005-48893066	ENST00000492622	FNDC3A	ENSG00000102531	protein_coding	exon	chr13-48975912-48976177	82845	3.57968e-19	0.119176	0.038	0.016	7.40618e-14	open
CM vs HM	4 - Mono	4a - CD14+ Mono	chr3-71753571-71755840	ENST00000304411	GPR27	ENSG00000170837	protein_coding	cds	chr3-71754050-71755177	0	3.97344e-19	0.171067	0.075	0.04	8.22085e-14	open
CM vs HM	4 - Mono	4a - CD14+ Mono	chr7-73715377-73716461	ENST00000470878	STX1A	ENSG00000106089	protein_coding	gap	chr7-73709123-73716580	0	5.32041e-19	0.104889	0.034	0.015	1.10077e-13	open
CM vs HM	4 - Mono	4a - CD14+ Mono	chr7-151795061-151795887	ENST00000488258	PRKAG2	ENSG00000106617	protein_coding	gap	chr7-151786542-151876506	0	1.85109e-18	0.118695	0.027	0.008	3.82982e-13	open
CM vs HM	4 - Mono	4a - CD14+ Mono	chr11-132093510-132094500	ENST00000550167	NTM	ENSG00000182667	protein_coding	gap	chr11-131911649-132146281	0	3.37792e-18	-0.291927	0.006	0.077	6.98874e-13	closed
CM vs HM	4 - Mono	4a - CD14+ Mono	chr7-38357905-38359754	ENST00000356264	AMPH	ENSG00000078053	protein_coding	utr	chr7-38383704-38384817	23949	7.47733e-18	-0.338148	0.04	0.155	1.54702e-12	closed
CM vs HM	4 - Mono	4a - CD14+ Mono	chr2-64869494-64870585	ENST00000445865	AC007880.1	ENSG00000234572	lincRNA	exon	chr2-64863414-64863626	5867	1.22785e-17	0.157955	0.043	0.014	2.54036e-12	open
CM vs HM	4 - Mono	4a - CD14+ Mono	chr19-18192565-18193565	ENST00000599612	MPV17L2	ENSG00000254858	protein_coding	cds	chr19-18193282-18193468	0	1.27716e-17	-0.269398	0.321	0.549	2.64237e-12	closed
CM vs HM	4 - Mono	4a - CD14+ Mono	chr12-76020149-76021362	ENST00000619060	PHLDA1	ENSG00000139289	protein_coding	utr	chr12-76025447-76030092	4084	2.0796e-17	0.132216	0.102	0.072	4.30258e-12	open
CM vs HM	4 - Mono	4a - CD14+ Mono	chr4-25172605-25174194	ENST00000512921	RP11-717K11.2	ENSG00000281028	protein_coding	gap	chr4-25160754-25252320	0	2.35631e-17	0.159167	0.1	0.065	4.87509e-12	open
CM vs HM	4 - Mono	4a - CD14+ Mono	chr20-50440406-50441468	ENST00000541713	PTPN1	ENSG00000196396	protein_coding	exon	chr20-50510321-50510590	68852	2.68908e-17	0.146438	0.114	0.078	5.56356e-12	open
CM vs HM	4 - Mono	4a - CD14+ Mono	chr8-106757629-106758626	ENST00000311955	ABRA	ENSG00000174429	protein_coding	utr	chr8-106759483-106761036	856	5.50785e-17	-0.318779	0.013	0.092	1.13955e-11	closed
CM vs HM	4 - Mono	4a - CD14+ Mono	chr4-74108723-74109841	ENST00000429519	MTHFD2L	ENSG00000163738	protein_coding	exon	chr4-74114174-74114383	4332	6.48091e-17	0.130226	0.088	0.061	1.34087e-11	open
CM vs HM	4 - Mono	4a - CD14+ Mono	chr8-19134117-19134996	ENST00000520920	RP11-1080G15.1	ENSG00000253557	lincRNA	gap	chr8-19085079-19227167	0	6.56803e-17	0.101835	0.021	0.006	1.35889e-11	open
CM vs HM	4 - Mono	4a - CD14+ Mono	chr17-36191980-36193104	ENST00000619989	CCL3L3	ENSG00000276085	protein_coding	utr	chr17-36194869-36195285	1764	7.41411e-17	-0.355428	0.074	0.223	1.53394e-11	closed
CM vs HM	4 - Mono	4a - CD14+ Mono	chr14-92531143-92532127	ENST00000620541	RIN3	ENSG00000100599	protein_coding	gap	chr14-92513977-92555750	0	7.88564e-17	0.101851	0.057	0.038	1.6315e-11	open
CM vs HM	4 - Mono	4a - CD14+ Mono	chr20-23120570-23123447	ENST00000443744	LINC00656	ENSG00000233746	lincRNA	exon	chr20-23125068-23126538	1620	1.51057e-16	0.176946	0.057	0.025	3.12529e-11	open
CM vs HM	4 - Mono	4a - CD14+ Mono	chr1-235910280-235911246	ENST00000465349	LYST	ENSG00000143669	protein_coding	exon	chr1-235883187-235883640	26639	1.82672e-16	0.0997437	0.024	0.008	3.7794e-11	open
CM vs HM	4 - Mono	4a - CD14+ Mono	chrX-1332615-1333540	ENST00000331035	IL3RA	ENSG00000185291	protein_coding	exon	chrX-1336616-1336926	3075	1.87405e-16	0.143829	0.107	0.076	3.87732e-11	open
CM vs HM	4 - Mono	4a - CD14+ Mono	chr6-37032856-37033905	ENST00000274963	FGD2	ENSG00000146192	protein_coding	utr	chr6-37028164-37029070	3785	1.96479e-16	0.182791	0.072	0.035	4.06504e-11	open
CM vs HM	4 - Mono	4a - CD14+ Mono	chr17-17990772-17991601	ENST00000584205	ATPAF2	ENSG00000171953	protein_coding	gap	chr17-17989593-18024623	0	2.22972e-16	0.0820623	0.015	0.003	4.61318e-11	open
CM vs HM	4 - Mono	4a - CD14+ Mono	chr3-185806941-185808278	ENST00000493302	IGF2BP2	ENSG00000073792	protein_coding	gap	chr3-185698348-185821011	0	2.24498e-16	0.113047	0.041	0.021	4.64475e-11	open
CM vs HM	4 - Mono	4a - CD14+ Mono	chr2-113103789-113104754	ENST00000465812	IL1RN	ENSG00000136689	protein_coding	exon	chr2-113107214-113107385	2459	2.38006e-16	0.0700965	0.014	0.003	4.92422e-11	open
CM vs HM	4 - Mono	4a - CD14+ Mono	chr14-77302917-77304219	ENST00000554948	POMT2	ENSG00000009830	protein_coding	cds	chr14-77302835-77302943	0	3.88806e-16	0.112312	0.04	0.019	8.0442e-11	open
CM vs HM	4 - Mono	4a - CD14+ Mono	chr1-151940972-151942002	ENST00000368814	THEM4	ENSG00000159445	protein_coding	exon	chr1-151909360-151909808	31163	5.86984e-16	0.0954728	0.177	0.162	1.21444e-10	open
CM vs HM	4 - Mono	4a - CD14+ Mono	chr5-74452557-74453633	ENST00000507781	LINC01331	ENSG00000248673	lincRNA	gap	chr5-74369522-74476337	0	5.87675e-16	-0.320953	0.032	0.124	1.21587e-10	closed
CM vs HM	4 - Mono	4a - CD14+ Mono	chr22-37525102-37526008	ENST00000403299	CARD10	ENSG00000100065	protein_coding	exon	chr22-37519343-37519542	5559	6.43524e-16	0.0838629	0.022	0.008	1.33142e-10	open
CM vs HM	4 - Mono	4a - CD14+ Mono	chr19-41225200-41227082	ENST00000593513	AXL	ENSG00000167601	protein_coding	utr	chr19-41226755-41226912	0	6.62408e-16	0.0846984	0.06	0.042	1.37049e-10	open
CM vs HM	4 - Mono	4a - CD14+ Mono	chr4-2787028-2787997	ENST00000452765	SH3BP2	ENSG00000087266	protein_coding	exon	chr4-2793023-2793138	5025	6.98441e-16	-0.297291	0.117	0.276	1.44504e-10	closed
CM vs HM	4 - Mono	4a - CD14+ Mono	chr13-41492333-41493497	ENST00000379359	RGCC	ENSG00000102760	protein_coding	utr	chr13-41470486-41470882	21450	1.09968e-15	0.0905657	0.062	0.044	2.27517e-10	open
CM vs HM	4 - Mono	4a - CD14+ Mono	chr16-57871242-57872096	ENST00000563028	KIFC3	ENSG00000140859	protein_coding	exon	chr16-57862729-57863053	8188	1.50218e-15	0.0808492	0.016	0.004	3.10793e-10	open
CM vs HM	4 - Mono	4a - CD14+ Mono	chr2-87824591-87826386	ENST00000398146	RGPD2	ENSG00000185304	protein_coding	cds	chr2-87825658-87825729	0	1.87145e-15	0.110298	0.015	0.001	3.87194e-10	open
CM vs HM	4 - Mono	4a - CD14+ Mono	chr11-44861901-44863011	ENST00000533786	TSPAN18	ENSG00000157570	protein_coding	gap	chr11-44860470-44906406	0	2.07032e-15	0.0836156	0.048	0.029	4.28338e-10	open
CM vs HM	4 - Mono	4a - CD14+ Mono	chr7-38353060-38354912	ENST00000609522	RP11-121A8.1	ENSG00000272908	lincRNA	exon	chr7-38329240-38329643	23416	2.27541e-15	-0.243824	0.006	0.058	4.7077e-10	closed
CM vs HM	4 - Mono	4a - CD14+ Mono	chr4-2281516-2282553	ENST00000515312	ZFYVE28	ENSG00000159733	protein_coding	gap	chr4-2274217-2304288	0	2.76376e-15	0.0909956	0.036	0.019	5.71808e-10	open
CM vs HM	4 - Mono	4a - CD14+ Mono	chr19-54859156-54860209	ENST00000402254	KIR3DL1	ENSG00000167633	protein_coding	gap	chr19-54825079-54865804	0	2.80761e-15	0.151687	0.079	0.047	5.8088e-10	open
CM vs HM	4 - Mono	4a - CD14+ Mono	chr17-8337769-8338995	ENST00000585275	RP11-849F2.4	ENSG00000266279	lincRNA	gap	chr17-8337909-8338422	0	3.36144e-15	-0.277111	0.013	0.071	6.95466e-10	closed
CM vs HM	4 - Mono	4a - CD14+ Mono	chrX-119040947-119041905	ENST00000422289	LONRF3	ENSG00000175556	protein_coding	utr	chrX-119017691-119018355	22591	3.69639e-15	0.0861025	0.03	0.015	7.64765e-10	open
CM vs HM	4 - Mono	4a - CD14+ Mono	chr13-100131865-100132800	ENST00000637657	PCCA	ENSG00000175198	protein_coding	gap	chr13-100112062-100154978	0	4.22294e-15	0.10374	0.024	0.007	8.73706e-10	open
CM vs HM	4 - Mono	4a - CD14+ Mono	chr7-157502490-157503633	ENST00000449903	AC006372.5	ENSG00000223872	lincRNA	gap	chr7-157503110-157503351	0	5.02419e-15	0.142056	0.063	0.033	1.03948e-09	open
CM vs HM	4 - Mono	4a - CD14+ Mono	chr21-34807204-34808841	ENST00000482318	RUNX1	ENSG00000159216	protein_coding	gap	chr21-34799463-34834409	0	6.2912e-15	0.106255	0.152	0.133	1.30162e-09	open
CM vs HM	4 - Mono	4a - CD14+ Mono	chr14-74571639-74572618	ENST00000557425	LTBP2	ENSG00000119681	protein_coding	gap	chr14-74551351-74612045	0	1.02051e-14	0.0763428	0.076	0.061	2.11139e-09	open
CM vs HM	4 - Mono	4a - CD14+ Mono	chr12-108838072-108839074	ENST00000551165	SSH1	ENSG00000084112	protein_coding	gap	chr12-108823362-108852637	0	1.05738e-14	0.0680282	0.145	0.137	2.18766e-09	open
CM vs HM	4 - Mono	4a - CD14+ Mono	chr10-110414334-110415328	ENST00000609514	RP11-525A16.4	ENSG00000273143	lincRNA	exon	chr10-110428840-110429010	13511	1.17317e-14	0.077476	0.084	0.071	2.42722e-09	open
CM vs HM	4 - Mono	4a - CD14+ Mono	chr11-111943856-111944956	ENST00000529225	DIXDC1	ENSG00000150764	protein_coding	gap	chr11-111929911-111964548	0	1.23308e-14	0.102938	0.021	0.006	2.55118e-09	open
CM vs HM	4 - Mono	4a - CD14+ Mono	chr1-230030532-230031935	ENST00000445339	RP11-552D4.1	ENSG00000228058	lincRNA	exon	chr1-230006773-230007162	23369	1.43682e-14	0.16027	0.075	0.043	2.9727e-09	open
CM vs HM	4 - Mono	4a - CD14+ Mono	chr12-121036334-121037458	ENST00000620239	OASL	ENSG00000135114	protein_coding	gap	chr12-121033744-121038773	0	1.44688e-14	0.0956835	0.03	0.014	2.99352e-09	open
CM vs HM	4 - Mono	4a - CD14+ Mono	chr8-140590814-140591983	ENST00000524328	AGO2	ENSG00000123908	protein_coding	gap	chr8-140585312-140605796	0	1.4537e-14	0.0564932	0.045	0.034	3.00763e-09	open
CM vs HM	4 - Mono	4a - CD14+ Mono	chr8-81130056-81131758	ENST00000220597	PAG1	ENSG00000076641	protein_coding	exon	chr8-81111591-81112068	17987	1.71419e-14	-0.31665	0.027	0.113	3.54656e-09	closed
CM vs HM	4 - Mono	4a - CD14+ Mono	chr17-35213983-35214922	ENST00000297307	SLC35G3	ENSG00000164729	protein_coding	exon	chr17-35192520-35194523	19459	1.87686e-14	0.0493822	0.016	0.008	3.88312e-09	open
CM vs HM	4 - Mono	4a - CD14+ Mono	chr2-144516950-144518053	ENST00000637267	ZEB2	ENSG00000169554	protein_coding	cds	chr2-144517278-144517350	0	2.06196e-14	0.0800221	0.113	0.099	4.2661e-09	open
CM vs HM	4 - Mono	4a - CD14+ Mono	chr7-73717547-73718630	ENST00000470878	STX1A	ENSG00000106089	protein_coding	gap	chr7-73716735-73719601	0	2.07409e-14	0.0848022	0.072	0.055	4.29119e-09	open
CM vs HM	4 - Mono	4a - CD14+ Mono	chr11-65215519-65216434	ENST00000533820	CAPN1	ENSG00000014216	protein_coding	utr	chr11-65211287-65212006	3512	2.1776e-14	0.102113	0.018	0.003	4.50535e-09	open
CM vs HM	4 - Mono	4a - CD14+ Mono	chr21-36429689-36430698	ENST00000314103	CHAF1B	ENSG00000159259	protein_coding	utr	chr21-36416367-36419015	10673	2.28229e-14	0.0675175	0.084	0.07	4.72194e-09	open
CM vs HM	4 - Mono	4a - CD14+ Mono	chr10-71805415-71806548	ENST00000622827	CDH23	ENSG00000107736	protein_coding	cds	chr10-71806168-71806281	0	2.36187e-14	-0.257492	0.038	0.129	4.88659e-09	closed
CM vs HM	4 - Mono	4a - CD14+ Mono	chr6-44820005-44821203	ENST00000475057	SUPT3H	ENSG00000196284	protein_coding	gap	chr6-44809502-44829763	0	2.54193e-14	0.0545813	0.011	0.002	5.25913e-09	open
CM vs HM	4 - Mono	4a - CD14+ Mono	chr11-128550526-128552333	ENST00000525404	ETS1	ENSG00000134954	protein_coding	gap	chr11-128536784-128556290	0	2.59867e-14	0.112795	0.045	0.024	5.37652e-09	open
CM vs HM	4 - Mono	4a - CD14+ Mono	chr6-137715324-137716583	ENST00000635999	RP11-95M15.1	ENSG00000230533	lincRNA	gap	chr6-137674125-137763816	0	2.8277e-14	0.0809335	0.019	0.007	5.85038e-09	open
CM vs HM	4 - Mono	4a - CD14+ Mono	chr12-54422881-54423857	ENST00000293379	ITGA5	ENSG00000161638	protein_coding	exon	chr12-54418981-54419460	3420	2.98805e-14	0.109949	0.061	0.039	6.18213e-09	open
CM vs HM	4 - Mono	4a - CD14+ Mono	chr7-138864286-138865154	ENST00000440172	KIAA1549	ENSG00000122778	protein_coding	gap	chr7-138861457-138867974	0	3.04444e-14	0.0955769	0.028	0.013	6.29879e-09	open
CM vs HM	4 - Mono	4a - CD14+ Mono	chr17-18025247-18026971	ENST00000585101	ATPAF2	ENSG00000171953	protein_coding	cds	chr17-18026319-18026416	0	3.35053e-14	0.124398	0.166	0.14	6.93207e-09	open
CM vs HM	4 - Mono	4a - CD14+ Mono	chr3-10205256-10206210	ENST00000256458	IRAK2	ENSG00000134070	protein_coding	gap	chr3-10200516-10209588	0	3.38615e-14	0.08455	0.017	0.005	7.00577e-09	open
CM vs HM	4 - Mono	4a - CD14+ Mono	chr6-13499809-13500882	ENST00000603223	GFOD1	ENSG00000145990	protein_coding	exon	chr6-13486638-13487662	12146	3.41043e-14	0.0596589	0.015	0.005	7.056e-09	open
CM vs HM	4 - Mono	4a - CD14+ Mono	chr1-9289751-9290858	ENST00000328089	SPSB1	ENSG00000171621	protein_coding	exon	chr1-9292880-9293071	2021	3.47887e-14	0.108658	0.072	0.051	7.1976e-09	open
CM vs HM	4 - Mono	4a - CD14+ Mono	chr9-134488103-134489060	ENST00000444936	RP11-473E2.2	ENSG00000223795	lincRNA	exon	chr9-134505472-134505546	16411	3.86404e-14	0.129486	0.02	0.002	7.9945e-09	open
CM vs HM	4 - Mono	4a - CD14+ Mono	chr14-71851835-71852897	ENST00000555581	RP6-114E22.1	ENSG00000266869	lincRNA	gap	chr14-71848737-71908164	0	4.29623e-14	-0.276845	0.013	0.078	8.88869e-09	closed
CM vs HM	4 - Mono	4a - CD14+ Mono	chr17-76484433-76485329	ENST00000592378	RHBDF2	ENSG00000129667	protein_coding	gap	chr17-76481546-76487711	0	4.44693e-14	0.0993766	0.04	0.021	9.20049e-09	open
CM vs HM	4 - Mono	4a - CD14+ Mono	chr11-128324243-128325372	ENST00000608492	RP11-702B10.1	ENSG00000272575	lincRNA	exon	chr11-128241278-128241441	82801	4.70208e-14	0.046769	0.02	0.013	9.72837e-09	open
CM vs HM	4 - Mono	4a - CD14+ Mono	chr6-32529640-32530796	ENST00000374975	HLA-DRB5	ENSG00000198502	protein_coding	cds	chr6-32530125-32530224	0	4.81668e-14	-0.342966	0.034	0.14	9.96548e-09	closed
CM vs HM	4 - Mono	4a - CD14+ Mono	chr6-111759547-111760528	ENST00000517419	FYN	ENSG00000010810	protein_coding	utr	chr6-111759845-111759917	0	5.49674e-14	0.0509389	0.023	0.015	1.13725e-08	open
CM vs HM	4 - Mono	4a - CD14+ Mono	chr1-17233445-17234417	ENST00000375471	PADI1	ENSG00000142623	protein_coding	gap	chr1-17232971-17237313	0	5.5926e-14	0.0814442	0.029	0.014	1.15708e-08	open
CM vs HM	4 - Mono	4a - CD14+ Mono	chr13-51518529-51519640	ENST00000483288	INTS6	ENSG00000102786	protein_coding	exon	chr13-51454061-51454264	64264	7.74761e-14	0.0747488	0.044	0.03	1.60294e-08	open
CM vs HM	4 - Mono	4a - CD14+ Mono	chr7-69256380-69257461	ENST00000435148	RP11-3P22.2	ENSG00000225718	lincRNA	gap	chr7-69224808-69271964	0	8.06692e-14	-0.29218	0.071	0.204	1.66901e-08	closed
CM vs HM	4 - Mono	4a - CD14+ Mono	chr5-112155075-112155920	ENST00000507810	EPB41L4A	ENSG00000129595	protein_coding	gap	chr5-112145999-112158400	0	9.24104e-14	0.0698269	0.012	0.002	1.91193e-08	open
CM vs HM	4 - Mono	4a - CD14+ Mono	chr2-113234994-113236052	ENST00000465084	PAX8	ENSG00000125618	protein_coding	cds	chr2-113235394-113235443	0	9.51566e-14	0.144069	0.058	0.032	1.96874e-08	open
CM vs HM	4 - Mono	4a - CD14+ Mono	chr7-101796437-101797562	ENST00000437600	CUX1	ENSG00000257923	protein_coding	exon	chr7-101815904-101816093	18341	9.57475e-14	-0.308243	0.033	0.123	1.98097e-08	closed
CM vs HM	4 - Mono	4a - CD14+ Mono	chr1-156113958-156115099	ENST00000368301	LMNA	ENSG00000160789	protein_coding	cds	chr1-156114919-156115274	0	1.03034e-13	0.0581372	0.136	0.129	2.13173e-08	open
CM vs HM	4 - Mono	4a - CD14+ Mono	chr10-26365438-26366358	ENST00000376261	GAD2	ENSG00000136750	protein_coding	utr	chr10-26300962-26304558	60879	1.13117e-13	0.124493	0.03	0.01	2.34034e-08	open
CM vs HM	4 - Mono	4a - CD14+ Mono	chr19-10639519-10640461	ENST00000591194	SLC44A2	ENSG00000129353	protein_coding	gap	chr19-10638316-10642366	0	1.35354e-13	-0.257069	0.011	0.07	2.80041e-08	closed
CM vs HM	4 - Mono	4a - CD14+ Mono	chr22-37432023-37433070	ENST00000402918	ELFN2	ENSG00000166897	protein_coding	exon	chr22-37427298-37427470	4552	1.39882e-13	0.110651	0.039	0.019	2.89408e-08	open
CM vs HM	4 - Mono	4a - CD14+ Mono	chr16-46394211-46395213	ENST00000303383	SHCBP1	ENSG00000171241	protein_coding	utr	chr16-46580554-46581728	185340	1.58094e-13	0.165669	0.07	0.034	3.2709e-08	open
CM vs HM	4 - Mono	4a - CD14+ Mono	chr11-35336815-35337944	ENST00000606205	SLC1A2	ENSG00000110436	protein_coding	gap	chr11-35317517-35418949	0	1.69821e-13	0.117566	0.058	0.035	3.51351e-08	open
CM vs HM	4 - Mono	4a - CD14+ Mono	chr17-10106854-10108057	ENST00000432992	GAS7	ENSG00000007237	protein_coding	gap	chr17-10019898-10198207	0	1.70943e-13	-0.237413	0.021	0.08	3.53672e-08	closed
CM vs HM	4 - Mono	4a - CD14+ Mono	chr7-1961580-1962658	ENST00000450235	MAD1L1	ENSG00000002822	protein_coding	gap	chr7-1957720-1980452	0	1.85658e-13	0.0739609	0.016	0.005	3.84118e-08	open
CM vs HM	4 - Mono	4a - CD14+ Mono	chr14-101721716-101722805	ENST00000557778	RP11-1029J19.5	ENSG00000258404	lincRNA	gap	chr14-101635489-101731053	0	2.08003e-13	0.0637084	0.051	0.04	4.30347e-08	open
CM vs HM	4 - Mono	4a - CD14+ Mono	chr9-114551652-114552641	ENST00000374050	ATP6V1G1	ENSG00000136888	protein_coding	exon	chr9-114587746-114587920	35104	2.33324e-13	0.0705766	0.022	0.01	4.82735e-08	open
CM vs HM	4 - Mono	4a - CD14+ Mono	chr10-30751568-30752544	ENST00000416310	RP11-14C22.6	ENSG00000230720	lincRNA	exon	chr10-30723419-30723740	27827	2.38096e-13	0.108077	0.017	0.002	4.9261e-08	open
CM vs HM	4 - Mono	4a - CD14+ Mono	chr14-93009144-93010058	ENST00000557309	ITPK1	ENSG00000100605	protein_coding	gap	chr14-92993998-93016675	0	2.77641e-13	0.147073	0.034	0.011	5.74425e-08	open
CM vs HM	4 - Mono	4a - CD14+ Mono	chr8-29654124-29654968	ENST00000518623	LINC00589	ENSG00000251191	lincRNA	exon	chr8-29673922-29674443	18953	3.26802e-13	0.0711854	0.032	0.019	6.76136e-08	open
CM vs HM	4 - Mono	4a - CD14+ Mono	chr5-132840938-132842013	ENST00000364404	RNA5SP192	ENSG00000201274	rRNA	exon	chr5-132848577-132848696	6563	3.27509e-13	0.128074	0.056	0.03	6.77599e-08	open
CM vs HM	4 - Mono	4a - CD14+ Mono	chr15-85646232-85647367	ENST00000560676	AKAP13	ENSG00000170776	protein_coding	gap	chr15-85645955-85655416	0	3.66793e-13	0.0670766	0.02	0.009	7.58875e-08	open
CM vs HM	4 - Mono	4a - CD14+ Mono	chr15-31434827-31435940	ENST00000558921	KLF13	ENSG00000169926	protein_coding	gap	chr15-31327790-31435369	0	3.8539e-13	0.102806	0.153	0.133	7.97354e-08	open
CM vs HM	4 - Mono	4a - CD14+ Mono	chr12-124635930-124636909	ENST00000542565	NCOR2	ENSG00000196498	protein_coding	exon	chr12-124567308-124567589	68340	3.91528e-13	0.0677216	0.054	0.039	8.10052e-08	open
CM vs HM	4 - Mono	4a - CD14+ Mono	chr7-151744958-151745949	ENST00000488258	PRKAG2	ENSG00000106617	protein_coding	gap	chr7-151675638-151781151	0	3.99438e-13	0.101403	0.09	0.068	8.26416e-08	open
CM vs HM	4 - Mono	4a - CD14+ Mono	chr10-119305959-119307111	ENST00000392870	GRK5	ENSG00000198873	protein_coding	gap	chr10-119207970-119326515	0	4.06369e-13	0.0834368	0.057	0.039	8.40758e-08	open
CM vs HM	4 - Mono	4a - CD14+ Mono	chr4-1043284-1044475	ENST00000514024	RNF212	ENSG00000178222	protein_coding	exon	chr4-1056250-1056503	11774	4.0699e-13	0.142324	0.112	0.081	8.42042e-08	open
CM vs HM	4 - Mono	4a - CD14+ Mono	chr10-17205834-17207010	ENST00000479046	TRDMT1	ENSG00000107614	protein_coding	exon	chr10-17201571-17202054	3779	4.08986e-13	0.0803087	0.15	0.138	8.46171e-08	open
CM vs HM	4 - Mono	4a - CD14+ Mono	chr20-48908358-48909631	ENST00000371917	ARFGEF2	ENSG00000124198	protein_coding	exon	chr20-48921890-48922010	12258	4.35422e-13	0.133891	0.075	0.047	9.00866e-08	open
CM vs HM	4 - Mono	4a - CD14+ Mono	chr11-43830587-43831567	ENST00000638034	HSD17B12	ENSG00000149084	protein_coding	cds	chr11-43830976-43831010	0	4.45205e-13	0.0846693	0.026	0.012	9.21106e-08	open
CM vs HM	4 - Mono	4a - CD14+ Mono	chr17-3796134-3797203	ENST00000263087	ITGAE	ENSG00000083457	protein_coding	gap	chr17-3777661-3801110	0	4.53568e-13	0.0434501	0.013	0.007	9.38409e-08	open
CM vs HM	4 - Mono	4a - CD14+ Mono	chr3-12147932-12148822	ENST00000621198	SYN2	ENSG00000157152	protein_coding	gap	chr3-12145836-12151236	0	4.53596e-13	0.0702931	0.013	0.003	9.38467e-08	open
CM vs HM	4 - Mono	4a - CD14+ Mono	chr6-33029108-33030038	ENST00000229829	HLA-DOA	ENSG00000204252	protein_coding	exon	chr6-33009455-33009612	19495	6.07188e-13	-0.308257	0.06	0.183	1.25624e-07	closed
CM vs HM	4 - Mono	4a - CD14+ Mono	chr2-101516877-101517920	ENST00000427042	AC092570.2	ENSG00000223826	lincRNA	exon	chr2-101486734-101486822	30054	6.09974e-13	0.114844	0.097	0.073	1.262e-07	open
CM vs HM	4 - Mono	4a - CD14+ Mono	chr6-14732445-14733600	ENST00000629853	RP11-146I2.1	ENSG00000234261	lincRNA	gap	chr6-14662294-14789989	0	6.14637e-13	0.0762066	0.04	0.024	1.27165e-07	open
CM vs HM	4 - Mono	4a - CD14+ Mono	chr17-43607857-43609207	ENST00000586764	ETV4	ENSG00000175832	protein_coding	exon	chr17-43579292-43579620	28236	7.03403e-13	0.129707	0.079	0.054	1.45531e-07	open
CM vs HM	4 - Mono	4a - CD14+ Mono	chr4-168449730-168450746	ENST00000511577	DDX60L	ENSG00000181381	protein_coding	gap	chr4-168448780-168453123	0	7.22413e-13	0.0857459	0.027	0.012	1.49464e-07	open
CM vs HM	4 - Mono	4a - CD14+ Mono	chr2-181876237-181877381	ENST00000480753	SSFA2	ENSG00000138434	protein_coding	exon	chr2-181891833-181892277	14451	7.29145e-13	0.0804093	0.044	0.03	1.50857e-07	open
CM vs HM	4 - Mono	4a - CD14+ Mono	chr12-96197752-96198494	ENST00000547249	ELK3	ENSG00000111145	protein_coding	utr	chr12-96198026-96198142	0	7.69333e-13	0.0606788	0.016	0.006	1.59171e-07	open
CM vs HM	4 - Mono	4a - CD14+ Mono	chr1-91948192-91949302	ENST00000362005	BRDT	ENSG00000137948	protein_coding	exon	chr1-91949371-91949682	68	7.9796e-13	0.0535541	0.01	0.003	1.65094e-07	open
CM vs HM	4 - Mono	4a - CD14+ Mono	chr17-9880214-9881169	ENST00000574745	GLP2R	ENSG00000065325	protein_coding	cds	chr17-9880378-9880516	0	8.16314e-13	0.0886566	0.025	0.01	1.68891e-07	open
CM vs HM	4 - Mono	4a - CD14+ Mono	chr22-18528382-18529603	ENST00000613577	TMEM191B	ENSG00000278558	protein_coding	cds	chr22-18529441-18529497	0	8.63594e-13	0.141312	0.143	0.111	1.78673e-07	open
CM vs HM	4 - Mono	4a - CD14+ Mono	chr2-155633733-155634741	ENST00000635799	AC093375.1	ENSG00000226383	lincRNA	exon	chr2-156011530-156011852	376788	9.58924e-13	-0.249777	0.015	0.076	1.98396e-07	closed
CM vs HM	4 - Mono	4a - CD14+ Mono	chr6-85463979-85465229	ENST00000369651	NT5E	ENSG00000135318	protein_coding	gap	chr6-85450479-85467059	0	9.59273e-13	0.135335	0.052	0.029	1.98469e-07	open
CM vs HM	4 - Mono	4a - CD14+ Mono	chr3-159929159-159930232	ENST00000445224	SCHIP1	ENSG00000151967	protein_coding	utr	chr3-159896775-159897360	31798	1.05287e-12	-0.288503	0.128	0.297	2.17833e-07	closed
CM vs HM	4 - Mono	4a - CD14+ Mono	chr11-62814933-62815763	ENST00000492066	STX5	ENSG00000162236	protein_coding	gap	chr11-62807629-62824165	0	1.10469e-12	0.119961	0.034	0.013	2.28555e-07	open
CM vs HM	4 - Mono	4a - CD14+ Mono	chr12-55846684-55847555	ENST00000552872	MMP19	ENSG00000123342	protein_coding	exon	chr12-55842744-55842966	3717	1.11412e-12	0.1036	0.052	0.032	2.30505e-07	open
CM vs HM	4 - Mono	4a - CD14+ Mono	chr2-170815406-170817469	ENST00000625689	GAD1	ENSG00000128683	protein_coding	utr	chr2-170816562-170817048	0	1.14006e-12	0.110389	0.064	0.041	2.35873e-07	open
CM vs HM	4 - Mono	4a - CD14+ Mono	chr12-128781845-128783929	ENST00000266771	SLC15A4	ENSG00000139370	protein_coding	utr	chr12-128793191-128794195	9261	1.17443e-12	0.0958553	0.087	0.069	2.42984e-07	open
CM vs HM	4 - Mono	4a - CD14+ Mono	chr15-40743447-40744512	ENST00000560905	RMDN3	ENSG00000137824	protein_coding	cds	chr15-40744094-40744149	0	1.18982e-12	0.0741411	0.022	0.01	2.46168e-07	open
CM vs HM	4 - Mono	4a - CD14+ Mono	chr18-63161373-63162884	ENST00000590515	BCL2	ENSG00000171791	protein_coding	gap	chr18-63128760-63161845	0	1.3153e-12	0.048706	0.082	0.075	2.7213e-07	open
CM vs HM	4 - Mono	4a - CD14+ Mono	chr12-93137597-93138595	ENST00000551928	RP11-202G11.2	ENSG00000257746	lincRNA	exon	chr12-93107308-93107600	29996	1.47452e-12	0.106119	0.054	0.033	3.05072e-07	open
CM vs HM	4 - Mono	4a - CD14+ Mono	chr1-89739228-89740398	ENST00000479252	LRRC8C	ENSG00000171488	protein_coding	gap	chr1-89686612-89758856	0	1.48796e-12	0.0623166	0.015	0.006	3.07851e-07	open
CM vs HM	4 - Mono	4a - CD14+ Mono	chr7-142808485-142809648	ENST00000632998	PRSS2	ENSG00000275896	protein_coding	utr	chr7-142774509-142774564	33920	1.48856e-12	0.0268632	0.027	0.023	3.07975e-07	open
CM vs HM	4 - Mono	4a - CD14+ Mono	chr1-227934566-227935712	ENST00000272164	WNT9A	ENSG00000143816	protein_coding	gap	chr1-227925520-227947792	0	1.59938e-12	0.0902085	0.024	0.01	3.30904e-07	open
CM vs HM	4 - Mono	4a - CD14+ Mono	chr9-115006288-115007381	ENST00000535648	TNC	ENSG00000041982	protein_coding	utr	chr9-115019578-115021156	12196	1.68812e-12	0.113243	0.083	0.057	3.49263e-07	open
CM vs HM	4 - Mono	4a - CD14+ Mono	chr20-47205255-47206343	ENST00000619049	ZMYND8	ENSG00000101040	protein_coding	utr	chr20-47209214-47210657	2870	1.70282e-12	0.101018	0.021	0.006	3.52304e-07	open
CM vs HM	4 - Mono	4a - CD14+ Mono	chr12-31736069-31737150	ENST00000281471	AMN1	ENSG00000151743	protein_coding	exon	chr12-31728971-31729174	6894	1.74969e-12	0.0593131	0.016	0.006	3.62001e-07	open
CM vs HM	4 - Mono	4a - CD14+ Mono	chr10-113087027-113088047	ENST00000629706	TCF7L2	ENSG00000148737	protein_coding	gap	chr10-113040127-113141183	0	1.82474e-12	0.0891232	0.053	0.034	3.7753e-07	open
CM vs HM	4 - Mono	4a - CD14+ Mono	chr5-134925587-134927616	ENST00000512783	PCBD2	ENSG00000132570	protein_coding	gap	chr5-134910467-134959039	0	1.87937e-12	0.0753388	0.012	0.002	3.88832e-07	open
CM vs HM	4 - Mono	4a - CD14+ Mono	chr4-80077416-80078323	ENST00000514959	ANTXR2	ENSG00000163297	protein_coding	gap	chr4-80056014-80079352	0	1.92669e-12	0.0845099	0.034	0.021	3.98622e-07	open
CM vs HM	4 - Mono	4a - CD14+ Mono	chr13-41694587-41695599	ENST00000478987	VWA8	ENSG00000102763	protein_coding	gap	chr13-41692973-41696068	0	1.96251e-12	0.0918012	0.047	0.029	4.06034e-07	open
CM vs HM	4 - Mono	4a - CD14+ Mono	chr18-62420186-62421419	ENST00000586569	TNFRSF11A	ENSG00000141655	protein_coding	utr	chr18-62385035-62391292	28893	2.12572e-12	0.0809382	0.071	0.055	4.39801e-07	open
CM vs HM	4 - Mono	4a - CD14+ Mono	chr17-68101138-68102125	ENST00000584047	AC145343.2	ENSG00000265055	lincRNA	gap	chr17-68096479-68101414	0	2.63142e-12	-0.294922	0.095	0.221	5.44428e-07	closed
CM vs HM	4 - Mono	4a - CD14+ Mono	chr10-122468786-122469819	ENST00000368984	HTRA1	ENSG00000166033	protein_coding	gap	chr10-122462125-122488901	0	2.65023e-12	0.104561	0.089	0.067	5.48319e-07	open
CM vs HM	4 - Mono	4a - CD14+ Mono	chr22-31829375-31830091	ENST00000535622	DEPDC5	ENSG00000100150	protein_coding	gap	chr22-31819226-31833914	0	3.14296e-12	0.0569654	0.007	0.001	6.50264e-07	open
CM vs HM	4 - Mono	4a - CD14+ Mono	chr1-93839061-93839984	ENST00000469315	BCAR3	ENSG00000137936	protein_coding	gap	chr1-93723537-93845566	0	3.27508e-12	0.100832	0.027	0.012	6.77598e-07	open
CM vs HM	4 - Mono	4a - CD14+ Mono	chr5-143261548-143262895	ENST00000394464	NR3C1	ENSG00000113580	protein_coding	utr	chr5-143277931-143281888	15035	3.3363e-12	0.0906545	0.076	0.059	6.90263e-07	open
CM vs HM	4 - Mono	4a - CD14+ Mono	chr3-105355321-105356325	ENST00000306107	ALCAM	ENSG00000170017	protein_coding	exon	chr3-105366909-105367481	10583	3.64425e-12	0.0772595	0.031	0.017	7.53977e-07	open
CM vs HM	4 - Mono	4a - CD14+ Mono	chr17-40320906-40321650	ENST00000577646	RARA	ENSG00000131759	protein_coding	gap	chr17-40309287-40326474	0	3.97358e-12	0.0775111	0.053	0.039	8.22114e-07	open
CM vs HM	4 - Mono	4a - CD14+ Mono	chr1-166988742-166989637	ENST00000447624	MAEL	ENSG00000143194	protein_coding	cds	chr1-166989353-166989484	0	4.63995e-12	-0.216821	0.001	0.035	9.59983e-07	closed
CM vs HM	4 - Mono	4a - CD14+ Mono	chr8-19127042-19127738	ENST00000520920	RP11-1080G15.1	ENSG00000253557	lincRNA	gap	chr8-19085079-19227167	0	4.70367e-12	0.0896853	0.025	0.011	9.73166e-07	open
CM vs HM	4 - Mono	4a - CD14+ Mono	chr1-225454391-225455546	ENST00000632561	RP11-496N12.9	ENSG00000282418	lincRNA	exon	chr1-225465021-225465310	9474	4.73991e-12	0.0971664	0.07	0.049	9.80664e-07	open
CM vs HM	4 - Mono	4a - CD14+ Mono	chr22-42888886-42889930	ENST00000634914	PACSIN2	ENSG00000100266	protein_coding	gap	chr22-42888799-42890946	0	5.15004e-12	-0.308597	0.052	0.158	1.06552e-06	closed
CM vs HM	4 - Mono	4a - CD14+ Mono	chr4-139021224-139022183	ENST00000630479	NOCT	ENSG00000151014	protein_coding	gap	chr4-139016172-139043073	0	5.29892e-12	0.102018	0.03	0.014	1.09632e-06	open
CM vs HM	4 - Mono	4a - CD14+ Mono	chr9-137200400-137201408	ENST00000409012	TPRN	ENSG00000176058	protein_coding	cds	chr9-137198987-137200711	0	5.36581e-12	-0.217158	0.263	0.453	1.11016e-06	closed
CM vs HM	4 - Mono	4a - CD14+ Mono	chr15-54150053-54150956	ENST00000260323	UNC13C	ENSG00000137766	protein_coding	gap	chr15-54143685-54235029	0	5.38495e-12	0.0506013	0.007	0	1.11412e-06	open
CM vs HM	4 - Mono	4a - CD14+ Mono	chr5-147403622-147404816	ENST00000523458	DPYSL3	ENSG00000113657	protein_coding	gap	chr5-147401697-147405609	0	5.5796e-12	0.088719	0.063	0.046	1.15439e-06	open
CM vs HM	4 - Mono	4a - CD14+ Mono	chr13-80469537-80470529	ENST00000377104	SPRY2	ENSG00000136158	protein_coding	exon	chr13-80340622-80340951	128585	5.65083e-12	0.0821339	0.04	0.025	1.16913e-06	open
CM vs HM	4 - Mono	4a - CD14+ Mono	chr17-3794686-3795680	ENST00000263087	ITGAE	ENSG00000083457	protein_coding	gap	chr17-3777661-3801110	0	5.71646e-12	0.0636552	0.012	0.003	1.18271e-06	open
CM vs HM	4 - Mono	4a - CD14+ Mono	chr12-119988365-119989494	ENST00000397558	BICDL1	ENSG00000135127	protein_coding	exon	chr12-119989869-119990297	374	5.73208e-12	0.0367807	0.037	0.032	1.18594e-06	open
CM vs HM	4 - Mono	4a - CD14+ Mono	chr9-40991714-40992787	ENST00000613309	PGM5-AS1	ENSG00000225655	lincRNA	exon	chr9-41073710-41073973	80922	5.92888e-12	-0.228711	0.3	0.507	1.22666e-06	closed
CM vs HM	4 - Mono	4a - CD14+ Mono	chr2-142867947-142869093	ENST00000264170	KYNU	ENSG00000115919	protein_coding	exon	chr2-142877498-142877736	8404	6.01544e-12	-0.27294	0.063	0.163	1.24457e-06	closed
CM vs HM	4 - Mono	4a - CD14+ Mono	chr2-203781880-203782982	ENST00000324106	CD28	ENSG00000178562	protein_coding	utr	chr2-203734913-203738912	42967	6.16004e-12	0.0812345	0.039	0.024	1.27448e-06	open
CM vs HM	4 - Mono	4a - CD14+ Mono	chr12-29782243-29783196	ENST00000553189	TMTC1	ENSG00000133687	protein_coding	gap	chr12-29768076-29782809	0	7.68657e-12	-0.262881	0.016	0.078	1.59031e-06	closed
CM vs HM	4 - Mono	4a - CD14+ Mono	chr12-75969438-75970596	ENST00000552856	RP11-114H23.1	ENSG00000258077	lincRNA	gap	chr12-75777531-75983720	0	7.75245e-12	0.087108	0.077	0.061	1.60394e-06	open
CM vs HM	4 - Mono	4a - CD14+ Mono	chr12-54427453-54429513	ENST00000548617	LINC01154	ENSG00000257477	lincRNA	gap	chr12-54428653-54429299	0	8.2556e-12	0.0566823	0.044	0.034	1.70804e-06	open
CM vs HM	4 - Mono	4a - CD14+ Mono	chr5-151096708-151097824	ENST00000522664	ANXA6	ENSG00000197043	protein_coding	utr	chr5-151100712-151100888	2887	8.78571e-12	0.073595	0.081	0.066	1.81772e-06	open
CM vs HM	4 - Mono	4a - CD14+ Mono	chr13-98476143-98477162	ENST00000539966	STK24	ENSG00000102572	protein_coding	gap	chr13-98475359-98482264	0	9.72884e-12	0.0828947	0.09	0.073	2.01285e-06	open
CM vs HM	4 - Mono	4a - CD14+ Mono	chr1-2926240-2927928	ENST00000378404	ACTRT2	ENSG00000169717	protein_coding	exon	chr1-3021483-3022903	93554	1.02163e-11	-0.14785	0.001	0.03	2.1137e-06	closed
CM vs HM	4 - Mono	4a - CD14+ Mono	chr10-5317389-5318530	ENST00000449457	RP11-445P17.8	ENSG00000224034	lincRNA	exon	chr10-5271198-5271236	46152	1.04108e-11	0.0873925	0.023	0.009	2.15395e-06	open
CM vs HM	4 - Mono	4a - CD14+ Mono	chr15-75167497-75168523	ENST00000563905	C15orf39	ENSG00000167173	protein_coding	exon	chr15-75195643-75195735	27119	1.24034e-11	0.109169	0.031	0.012	2.56621e-06	open
CM vs HM	4 - Mono	4a - CD14+ Mono	chr8-12115326-12116368	ENST00000400085	ZNF705D	ENSG00000215343	protein_coding	utr	chr8-12113159-12115516	0	1.26574e-11	0.0525443	0.006	0	2.61876e-06	open
CM vs HM	4 - Mono	4a - CD14+ Mono	chr5-94793102-94794178	ENST00000515393	MCTP1	ENSG00000175471	protein_coding	gap	chr5-94779164-94799012	0	1.27947e-11	0.0630457	0.028	0.017	2.64716e-06	open
CM vs HM	4 - Mono	4a - CD14+ Mono	chr4-121690512-121691419	ENST00000515017	ANXA5	ENSG00000164111	protein_coding	gap	chr4-121686373-121696580	0	1.29932e-11	0.0739333	0.032	0.018	2.68824e-06	open
CM vs HM	4 - Mono	4a - CD14+ Mono	chr6-7618068-7619079	ENST00000342415	SNRNP48	ENSG00000168566	protein_coding	utr	chr6-7608874-7611967	6100	1.34738e-11	0.128479	0.078	0.053	2.78766e-06	open
CM vs HM	4 - Mono	4a - CD14+ Mono	chr22-22721799-22722672	ENST00000438185	LL22NC03-102D1.18	ENSG00000223999	lincRNA	exon	chr22-22693147-22693312	28486	1.42752e-11	0.0663167	0.02	0.009	2.95347e-06	open
CM vs HM	4 - Mono	4a - CD14+ Mono	chr1-1200762-1201996	ENST00000328596	TNFRSF18	ENSG00000186891	protein_coding	utr	chr1-1203508-1203590	1511	1.45657e-11	0.0505805	0.025	0.016	3.01358e-06	open
CM vs HM	4 - Mono	4a - CD14+ Mono	chr13-114148223-114149207	ENST00000334062	RASA3	ENSG00000185989	protein_coding	exon	chr13-114132435-114132611	15611	1.48867e-11	0.0380301	0.028	0.021	3.07997e-06	open
CM vs HM	4 - Mono	4a - CD14+ Mono	chr21-44065150-44066117	ENST00000422875	TRAPPC10	ENSG00000160218	protein_coding	gap	chr21-44063786-44074323	0	1.51987e-11	0.0543423	0.037	0.029	3.14453e-06	open
CM vs HM	4 - Mono	4a - CD14+ Mono	chr1-15952407-15953499	ENST00000537142	ZBTB17	ENSG00000116809	protein_coding	gap	chr1-15947124-15973038	0	1.52315e-11	0.0880213	0.068	0.05	3.15132e-06	open
CM vs HM	4 - Mono	4a - CD14+ Mono	chrX-154040011-154041108	ENST00000637791	MECP2	ENSG00000169057	protein_coding	gap	chrX-154034017-154092183	0	1.53835e-11	0.100051	0.068	0.047	3.18277e-06	open
CM vs HM	4 - Mono	4a - CD14+ Mono	chr4-140095566-140096810	ENST00000509479	MAML3	ENSG00000196782	protein_coding	gap	chr4-139890968-140152859	0	1.58101e-11	0.0864957	0.151	0.135	3.27103e-06	open
CM vs HM	4 - Mono	4a - CD14+ Mono	chr17-19607247-19608181	ENST00000270570	SLC47A1	ENSG00000142494	protein_coding	utr	chr17-19577554-19579034	28212	1.61419e-11	-0.213127	0.003	0.042	3.33968e-06	closed
CM vs HM	4 - Mono	4a - CD14+ Mono	chr10-119845399-119846346	ENST00000495407	MCMBP	ENSG00000197771	protein_coding	gap	chr10-119843427-119847612	0	1.63766e-11	-0.155595	0.001	0.026	3.38824e-06	closed
CM vs HM	4 - Mono	4a - CD14+ Mono	chr7-75854775-75855348	ENST00000466232	RHBDD2	ENSG00000005486	protein_coding	gap	chr7-75842750-75881364	0	1.73025e-11	0.0918825	0.02	0.007	3.57981e-06	open
CM vs HM	4 - Mono	4a - CD14+ Mono	chr2-31297433-31298604	ENST00000322054	EHD3	ENSG00000013016	protein_coding	utr	chr2-31266705-31269447	27985	1.73047e-11	0.0707017	0.036	0.022	3.58025e-06	open
CM vs HM	4 - Mono	4a - CD14+ Mono	chr2-113239699-113241643	ENST00000554830	PAX8	ENSG00000125618	protein_coding	cds	chr2-113241551-113241726	0	1.73201e-11	0.0786318	0.042	0.028	3.58344e-06	open
CM vs HM	4 - Mono	4a - CD14+ Mono	chr12-29690797-29692136	ENST00000553189	TMTC1	ENSG00000133687	protein_coding	gap	chr12-29660886-29751665	0	1.75289e-11	-0.21527	0.006	0.048	3.62664e-06	closed
CM vs HM	4 - Mono	4a - CD14+ Mono	chr4-74033441-74034434	ENST00000296026	CXCL3	ENSG00000163734	protein_coding	utr	chr4-74036589-74037261	2154	1.82979e-11	0.0629828	0.033	0.021	3.78574e-06	open
CM vs HM	4 - Mono	4a - CD14+ Mono	chr13-41456884-41457867	ENST00000379359	RGCC	ENSG00000102760	protein_coding	cds	chr13-41457708-41457756	0	1.91293e-11	0.0442258	0.19	0.185	3.95776e-06	open
CM vs HM	4 - Mono	4a - CD14+ Mono	chr16-48317300-48318194	ENST00000566755	LONP2	ENSG00000102910	protein_coding	gap	chr16-48303306-48334215	0	1.93199e-11	0.0651669	0.036	0.026	3.99719e-06	open
CM vs HM	4 - Mono	4a - CD14+ Mono	chr11-118608117-118609200	ENST00000621027	PHLDB1	ENSG00000019144	protein_coding	gap	chr11-118607700-118613815	0	1.93506e-11	0.0666644	0.118	0.106	4.00354e-06	open
CM vs HM	4 - Mono	4a - CD14+ Mono	chr13-48749443-48750380	ENST00000282018	CYSLTR2	ENSG00000152207	protein_coding	utr	chr13-48707859-48711226	38216	1.98048e-11	0.0651044	0.027	0.016	4.09751e-06	open
CM vs HM	4 - Mono	4a - CD14+ Mono	chr16-29271450-29272271	ENST00000622268	RP11-426C22.8	ENSG00000277999	lincRNA	exon	chr16-29272220-29272772	0	2.03415e-11	0.0376588	0.011	0.005	4.20855e-06	open
CM vs HM	4 - Mono	4a - CD14+ Mono	chr1-116537124-116539194	ENST00000526981	CD58	ENSG00000116815	protein_coding	gap	chr1-116521984-116544310	0	2.04739e-11	0.0870573	0.087	0.071	4.23595e-06	open
CM vs HM	4 - Mono	4a - CD14+ Mono	chr21-45874700-45875596	ENST00000498121	PCBP3	ENSG00000183570	protein_coding	gap	chr21-45869325-45896207	0	2.07093e-11	0.0686279	0.012	0.002	4.28464e-06	open
CM vs HM	4 - Mono	4a - CD14+ Mono	chr22-38984651-38985713	ENST00000618553	APOBEC3A	ENSG00000128383	protein_coding	gap	chr22-38962214-38992430	0	2.14877e-11	0.0468865	0.013	0.006	4.4457e-06	open
CM vs HM	4 - Mono	4a - CD14+ Mono	chr19-44943481-44944527	ENST00000592954	APOC4	ENSG00000267467	protein_coding	gap	chr19-44942354-44944748	0	2.17385e-11	0.0835737	0.067	0.052	4.49759e-06	open
CM vs HM	4 - Mono	4a - CD14+ Mono	chr10-95397652-95398491	ENST00000607232	SORBS1	ENSG00000095637	protein_coding	gap	chr10-95397284-95399016	0	2.17698e-11	0.0428649	0.011	0.004	4.50406e-06	open
CM vs HM	4 - Mono	4a - CD14+ Mono	chr17-4130402-4131421	ENST00000574474	ZZEF1	ENSG00000074755	protein_coding	gap	chr17-4124052-4142541	0	2.27044e-11	-0.285592	0.036	0.126	4.69742e-06	closed
CM vs HM	4 - Mono	4a - CD14+ Mono	chr1-66732397-66733427	ENST00000435165	SGIP1	ENSG00000118473	protein_coding	gap	chr1-66729420-66733747	0	2.41489e-11	0.0757001	0.06	0.046	4.9963e-06	open
CM vs HM	4 - Mono	4a - CD14+ Mono	chr19-45667250-45668453	ENST00000590918	GIPR	ENSG00000010310	protein_coding	utr	chr19-45668244-45668298	0	2.44506e-11	0.0685702	0.04	0.026	5.05872e-06	open
CM vs HM	4 - Mono	4a - CD14+ Mono	chr10-26407071-26408114	ENST00000376236	APBB1IP	ENSG00000077420	protein_coding	exon	chr10-26438203-26438455	30088	2.49789e-11	0.0702073	0.037	0.024	5.16802e-06	open
CM vs HM	4 - Mono	4a - CD14+ Mono	chr1-87902498-87903549	ENST00000437598	RP5-1027O11.1	ENSG00000224235	lincRNA	gap	chr1-87900242-87903898	0	2.66221e-11	-0.223456	0.016	0.075	5.50798e-06	closed
CM vs HM	4 - Mono	4a - CD14+ Mono	chr1-167517307-167518180	ENST00000483825	CD247	ENSG00000198821	protein_coding	gap	chr1-167440768-167518407	0	2.68831e-11	0.0448434	0.012	0.005	5.56198e-06	open
CM vs HM	4 - Mono	4a - CD14+ Mono	chr6-136403070-136404128	ENST00000618822	MAP7	ENSG00000135525	protein_coding	gap	chr6-136389518-136411619	0	2.69867e-11	0.0987515	0.036	0.02	5.58341e-06	open
CM vs HM	4 - Mono	4a - CD14+ Mono	chr7-76008619-76009677	ENST00000474328	STYXL1	ENSG00000127952	protein_coding	gap	chr7-76005405-76028641	0	2.73781e-11	0.107792	0.038	0.021	5.6644e-06	open
CM vs HM	4 - Mono	4a - CD14+ Mono	chr6-140043120-140044708	ENST00000456896	RP3-332B22.1	ENSG00000236013	lincRNA	exon	chr6-140067435-140067880	22726	2.78623e-11	0.080653	0.057	0.043	5.76456e-06	open
CM vs HM	4 - Mono	4a - CD14+ Mono	chrX-56788538-56789453	ENST00000637096	LINC01420	ENSG00000204272	protein_coding	gap	chrX-56732200-56811019	0	2.79041e-11	-0.208894	0.004	0.042	5.77321e-06	closed
CM vs HM	4 - Mono	4a - CD14+ Mono	chr1-230978422-230979469	ENST00000522821	TTC13	ENSG00000143643	protein_coding	cds	chr1-230978560-230978796	0	2.86486e-11	-0.23586	0.197	0.369	5.92725e-06	closed
CM vs HM	4 - Mono	4a - CD14+ Mono	chr1-243595918-243597152	ENST00000366540	AKT3	ENSG00000117020	protein_coding	gap	chr1-243573049-243613670	0	2.8776e-11	0.0519658	0.023	0.015	5.9536e-06	open
CM vs HM	4 - Mono	4a - CD14+ Mono	chr6-111113429-111114774	ENST00000612036	SLC16A10	ENSG00000112394	protein_coding	gap	chr6-111088096-111172694	0	2.95217e-11	0.0530534	0.088	0.081	6.10789e-06	open
CM vs HM	4 - Mono	4a - CD14+ Mono	chr12-127269922-127270930	ENST00000536330	RP11-955H22.1	ENSG00000256292	lincRNA	exon	chr12-127274467-127274521	3536	2.95816e-11	-0.289965	0.018	0.08	6.12029e-06	closed
CM vs HM	4 - Mono	4a - CD14+ Mono	chr1-117664008-117665009	ENST00000369448	FAM46C	ENSG00000183508	protein_coding	utr	chr1-117624045-117628372	35635	3.10967e-11	0.0345965	0.017	0.012	6.43374e-06	open
CM vs HM	4 - Mono	4a - CD14+ Mono	chr7-2720456-2721653	ENST00000489665	AMZ1	ENSG00000174945	protein_coding	gap	chr7-2709817-2764711	0	3.17244e-11	0.0822121	0.032	0.018	6.56361e-06	open
CM vs HM	4 - Mono	4a - CD14+ Mono	chr20-34875892-34877290	ENST00000493805	ACSS2	ENSG00000131069	protein_coding	cds	chr20-34876646-34876823	0	3.18737e-11	-0.148119	0.398	0.587	6.5945e-06	closed
CM vs HM	4 - Mono	4a - CD14+ Mono	chr1-89671833-89672643	ENST00000482063	LRRC8C	ENSG00000171488	protein_coding	gap	chr1-89633323-89686469	0	3.42017e-11	0.0615113	0.016	0.006	7.07617e-06	open
CM vs HM	4 - Mono	4a - CD14+ Mono	chr19-45467295-45468439	ENST00000615753	FOSB	ENSG00000125740	protein_coding	utr	chr19-45467995-45468586	0	3.46584e-11	0.0133545	0.238	0.272	7.17065e-06	open
CM vs HM	4 - Mono	4a - CD14+ Mono	chr2-227428555-227429426	ENST00000409979	AGFG1	ENSG00000173744	protein_coding	exon	chr2-227472152-227472588	42725	3.59153e-11	0.0950015	0.012	0.001	7.43069e-06	open
CM vs HM	4 - Mono	4a - CD14+ Mono	chr22-25067866-25069018	ENST00000494730	KIAA1671	ENSG00000197077	protein_coding	gap	chr22-25049365-25170819	0	3.71769e-11	0.0474319	0.016	0.01	7.69171e-06	open
CM vs HM	4 - Mono	4a - CD14+ Mono	chr6-108841037-108842249	ENST00000368972	ARMC2	ENSG00000118690	protein_coding	exon	chr6-108848416-108848546	6166	4.75524e-11	-0.280604	0.093	0.232	9.83835e-06	closed
CM vs HM	4 - Mono	4a - CD14+ Mono	chr2-97662421-97663088	ENST00000451664	ACTR1B	ENSG00000115073	protein_coding	gap	chr2-97661947-97663842	0	5.70922e-11	0.0706634	0.045	0.033	1.18121e-05	open
CM vs HM	4 - Mono	4a - CD14+ Mono	chr11-843665-845363	ENST00000530404	TSPAN4	ENSG00000214063	protein_coding	utr	chr11-843315-843729	0	5.87668e-11	-0.305394	0.053	0.16	1.21586e-05	closed
CM vs HM	4 - Mono	4a - CD14+ Mono	chr11-35214495-35215547	ENST00000526000	CD44	ENSG00000026508	protein_coding	cds	chr11-35214852-35214861	0	5.97075e-11	0.0742183	0.106	0.094	1.23532e-05	open
CM vs HM	4 - Mono	4a - CD14+ Mono	chr7-149620594-149622552	ENST00000486744	KRBA1	ENSG00000133619	protein_coding	exon	chr7-149714781-149715066	92228	5.98073e-11	0.126525	0.046	0.025	1.23738e-05	open
CM vs HM	4 - Mono	4a - CD14+ Mono	chr1-11692618-11693736	ENST00000294485	DRAXIN	ENSG00000162490	protein_coding	gap	chr1-11691854-11706248	0	6.02206e-11	0.0740999	0.034	0.021	1.24594e-05	open
CM vs HM	4 - Mono	4a - CD14+ Mono	chr3-127753546-127755779	ENST00000493611	MGLL	ENSG00000074416	protein_coding	gap	chr3-127722567-127781788	0	6.04726e-11	-0.276342	0.063	0.181	1.25115e-05	closed
CM vs HM	4 - Mono	4a - CD14+ Mono	chr5-72600052-72601010	ENST00000512573	CTC-347C20.2	ENSG00000248371	lincRNA	gap	chr5-72574853-72660566	0	6.08407e-11	0.0841841	0.043	0.028	1.25876e-05	open
CM vs HM	4 - Mono	4a - CD14+ Mono	chr6-13466046-13466993	ENST00000612338	GFOD1	ENSG00000145990	protein_coding	gap	chr6-13365663-13486010	0	6.15526e-11	0.0551885	0.014	0.006	1.27349e-05	open
CM vs HM	4 - Mono	4a - CD14+ Mono	chr12-107328366-107330393	ENST00000550706	BTBD11	ENSG00000151136	protein_coding	gap	chr12-107320076-107543934	0	6.2158e-11	0.0383083	0.144	0.146	1.28602e-05	open
CM vs HM	4 - Mono	4a - CD14+ Mono	chr15-101199289-101200395	ENST00000254190	CHSY1	ENSG00000131873	protein_coding	gap	chr15-101178981-101235081	0	6.3183e-11	0.0917797	0.061	0.044	1.30722e-05	open
CM vs HM	4 - Mono	4a - CD14+ Mono	chr10-104328713-104329845	ENST00000358187	ITPRIP	ENSG00000148841	protein_coding	utr	chr10-104328865-104328924	0	6.32252e-11	0.0634426	0.107	0.094	1.3081e-05	open
CM vs HM	4 - Mono	4a - CD14+ Mono	chr15-20645688-20646627	ENST00000613130	RP11-467L19.16	ENSG00000278626	lincRNA	exon	chr15-20642799-20643448	2239	6.35011e-11	-0.325082	0.09	0.226	1.31381e-05	closed
CM vs HM	4 - Mono	4a - CD14+ Mono	chr8-133067979-133069185	ENST00000524345	SLA	ENSG00000155926	protein_coding	gap	chr8-133050916-133102552	0	6.50527e-11	0.0479868	0.033	0.025	1.34591e-05	open
CM vs HM	4 - Mono	4a - CD14+ Mono	chr16-4095507-4096531	ENST00000572288	ADCY9	ENSG00000162104	protein_coding	gap	chr16-4007559-4113749	0	6.78075e-11	-0.259562	0.011	0.065	1.4029e-05	closed
CM vs HM	4 - Mono	4a - CD14+ Mono	chr12-93785041-93785888	ENST00000551065	CRADD	ENSG00000169372	protein_coding	gap	chr12-93679073-93859318	0	6.9855e-11	0.0840353	0.043	0.027	1.44526e-05	open
CM vs HM	4 - Mono	4a - CD14+ Mono	chr10-31745276-31746289	ENST00000433770	RP11-472N13.3	ENSG00000237797	lincRNA	exon	chr10-31707306-31707388	37887	7.24494e-11	0.0572047	0.009	0.002	1.49894e-05	open
CM vs HM	4 - Mono	4a - CD14+ Mono	chr20-828938-830666	ENST00000381941	FAM110A	ENSG00000125898	protein_coding	exon	chr20-833715-833951	3048	7.27944e-11	0.134967	0.072	0.048	1.50608e-05	open
CM vs HM	4 - Mono	4a - CD14+ Mono	chr17-47649215-47650156	ENST00000583648	KPNB1	ENSG00000108424	protein_coding	utr	chr17-47649495-47649877	0	7.28704e-11	-0.220716	0.279	0.474	1.50765e-05	closed
CM vs HM	4 - Mono	4a - CD14+ Mono	chr9-37408800-37409834	ENST00000318158	GRHPR	ENSG00000137106	protein_coding	exon	chr9-37422666-37422833	12831	7.49316e-11	0.0791202	0.012	0.002	1.5503e-05	open
CM vs HM	4 - Mono	4a - CD14+ Mono	chr8-19135514-19136420	ENST00000520920	RP11-1080G15.1	ENSG00000253557	lincRNA	gap	chr8-19085079-19227167	0	7.65349e-11	0.075475	0.027	0.014	1.58347e-05	open
CM vs HM	4 - Mono	4a - CD14+ Mono	chr16-89192538-89193604	ENST00000289746	CDH15	ENSG00000129910	protein_coding	cds	chr16-89193470-89193606	0	7.7747e-11	0.0796222	0.092	0.076	1.60855e-05	open
CM vs HM	4 - Mono	4a - CD14+ Mono	chr22-41603654-41604628	ENST00000263256	DESI1	ENSG00000100418	protein_coding	cds	chr22-41604044-41604153	0	7.77532e-11	0.0489022	0.009	0.003	1.60868e-05	open
CM vs HM	4 - Mono	4a - CD14+ Mono	chr2-224909432-224910691	ENST00000492369	DOCK10	ENSG00000135905	protein_coding	gap	chr2-224896378-224916694	0	7.80956e-11	0.0957455	0.105	0.088	1.61576e-05	open
CM vs HM	4 - Mono	4a - CD14+ Mono	chr7-41731171-41733482	ENST00000638023	INHBA	ENSG00000122641	protein_coding	exon	chr7-41705587-41705834	25336	7.84299e-11	-0.296757	0.038	0.135	1.62267e-05	closed
CM vs HM	4 - Mono	4a - CD14+ Mono	chr10-30637858-30638699	ENST00000375318	LYZL2	ENSG00000151033	protein_coding	exon	chr10-30629593-30629762	8095	8.19137e-11	0.0640916	0.012	0.003	1.69475e-05	open
CM vs HM	4 - Mono	4a - CD14+ Mono	chr1-246218450-246219455	ENST00000630181	SMYD3	ENSG00000185420	protein_coding	gap	chr1-245929938-246327200	0	8.61711e-11	-0.174712	0.001	0.029	1.78284e-05	closed
CM vs HM	4 - Mono	4a - CD14+ Mono	chr20-10487064-10487851	ENST00000334534	SLX4IP	ENSG00000149346	protein_coding	gap	chr20-10458232-10556230	0	8.82325e-11	0.0903966	0.028	0.013	1.82549e-05	open
CM vs HM	4 - Mono	4a - CD14+ Mono	chr8-124629464-124630435	ENST00000529463	MTSS1	ENSG00000170873	protein_coding	gap	chr8-124591236-124673196	0	8.9989e-11	0.0726071	0.098	0.088	1.86183e-05	open
CM vs HM	4 - Mono	4a - CD14+ Mono	chr15-23565288-23566753	ENST00000626930	AC126407.1	ENSG00000281873	protein_coding	cds	chr15-23566338-23566366	0	9.03741e-11	0.0910377	0.015	0.003	1.8698e-05	open
CM vs HM	4 - Mono	4a - CD14+ Mono	chr5-1488529-1489638	ENST00000514484	LPCAT1	ENSG00000153395	protein_coding	gap	chr5-1488452-1489745	0	9.16179e-11	0.07191	0.036	0.023	1.89553e-05	open
CM vs HM	4 - Mono	4a - CD14+ Mono	chr16-46398616-46399520	ENST00000303383	SHCBP1	ENSG00000171241	protein_coding	utr	chr16-46580554-46581728	181033	9.52789e-11	0.15271	0.049	0.021	1.97127e-05	open
CM vs HM	4 - Mono	4a - CD14+ Mono	chr19-35404970-35405885	ENST00000602796	LINC01531	ENSG00000205786	lincRNA	gap	chr19-35399658-35406584	0	9.64686e-11	0.0621827	0.02	0.01	1.99589e-05	open
CM vs HM	4 - Mono	4a - CD14+ Mono	chr2-98935850-98937195	ENST00000428096	KIAA1211L	ENSG00000196872	protein_coding	utr	chr2-98935938-98936203	0	9.66625e-11	0.062807	0.015	0.006	1.9999e-05	open
CM vs HM	4 - Mono	4a - CD14+ Mono	chr2-238643940-238644771	ENST00000448543	AC113618.1	ENSG00000234279	lincRNA	exon	chr2-238720324-238720421	75552	1.03486e-10	0.0710069	0.011	0.002	2.14107e-05	open
CM vs HM	4 - Mono	4a - CD14+ Mono	chr10-88152301-88153404	ENST00000371947	RNLS	ENSG00000184719	protein_coding	utr	chr10-88273864-88274960	120459	1.10042e-10	0.0701714	0.02	0.009	2.27671e-05	open
CM vs HM	4 - Mono	4a - CD14+ Mono	chr2-169050541-169051514	ENST00000602501	DHRS9	ENSG00000073737	protein_coding	exon	chr2-169064789-169065099	13274	1.12175e-10	0.0790651	0.033	0.019	2.32085e-05	open
CM vs HM	4 - Mono	4a - CD14+ Mono	chr12-127237902-127238815	ENST00000536330	RP11-955H22.1	ENSG00000256292	lincRNA	exon	chr12-127274467-127274521	35651	1.14075e-10	-0.263968	0.013	0.064	2.36016e-05	closed
CM vs HM	4 - Mono	4a - CD14+ Mono	chr2-102147652-102148573	ENST00000452403	IL1R1	ENSG00000115594	protein_coding	gap	chr2-102069815-102153940	0	1.25269e-10	0.0871939	0.023	0.01	2.59176e-05	open
CM vs HM	4 - Mono	4a - CD14+ Mono	chr14-68695020-68696025	ENST00000488612	RAD51B	ENSG00000182185	protein_coding	gap	chr14-68650857-68729807	0	1.25501e-10	0.0596546	0.042	0.03	2.59655e-05	open
CM vs HM	4 - Mono	4a - CD14+ Mono	chr6-155170890-155171884	ENST00000529824	TIAM2	ENSG00000146426	protein_coding	gap	chr6-155165410-155176815	0	1.35661e-10	0.0521649	0.014	0.007	2.80676e-05	open
CM vs HM	4 - Mono	4a - CD14+ Mono	chr20-53892668-53893794	ENST00000448484	BCAS1	ENSG00000064787	protein_coding	utr	chr20-53936777-53941457	42982	1.37364e-10	0.0615708	0.057	0.044	2.84199e-05	open
CM vs HM	4 - Mono	4a - CD14+ Mono	chr8-30081691-30082647	ENST00000522794	SARAF	ENSG00000133872	protein_coding	utr	chr8-30082229-30082424	0	1.3801e-10	0.0467185	0.218	0.232	2.85536e-05	open
CM vs HM	4 - Mono	4a - CD14+ Mono	chr8-140588448-140589492	ENST00000524328	AGO2	ENSG00000123908	protein_coding	gap	chr8-140585312-140605796	0	1.42084e-10	0.0445513	0.018	0.01	2.93965e-05	open
CM vs HM	4 - Mono	4a - CD14+ Mono	chr13-40187013-40188339	ENST00000615947	LINC00598	ENSG00000215483	lincRNA	gap	chr13-40097968-40217577	0	1.54147e-10	0.054296	0.016	0.008	3.18923e-05	open
CM vs HM	4 - Mono	4a - CD14+ Mono	chr17-3798276-3799211	ENST00000263087	ITGAE	ENSG00000083457	protein_coding	gap	chr17-3777661-3801110	0	1.67094e-10	0.0598504	0.039	0.027	3.45709e-05	open
CM vs HM	4 - Mono	4a - CD14+ Mono	chr16-21519890-21520867	ENST00000613759	CTB-31N19.5	ENSG00000273956	lincRNA	exon	chr16-21526824-21527214	5956	1.70302e-10	0.0461388	0.314	0.354	3.52347e-05	open
CM vs HM	4 - Mono	4a - CD14+ Mono	chr4-98929928-98930589	ENST00000450253	EIF4E	ENSG00000151247	protein_coding	utr	chr4-98929113-98930637	0	1.80301e-10	0.0379966	0.128	0.127	3.73033e-05	open
CM vs HM	4 - Mono	4a - CD14+ Mono	chr16-65739210-65740300	ENST00000563811	RP11-351A20.1	ENSG00000261818	lincRNA	exon	chr16-65646687-65646947	92262	1.82023e-10	-0.261255	0.02	0.088	3.76596e-05	closed
CM vs HM	4 - Mono	4a - CD14+ Mono	chr11-121464103-121465120	ENST00000532451	SORL1	ENSG00000137642	protein_coding	gap	chr11-121452617-121470006	0	1.8234e-10	0.0613348	0.038	0.027	3.77253e-05	open
CM vs HM	4 - Mono	4a - CD14+ Mono	chr6-157760909-157761955	ENST00000614800	SNX9	ENSG00000130340	protein_coding	gap	chr6-157716204-157766384	0	1.87259e-10	0.0502761	0.024	0.015	3.8743e-05	open
CM vs HM	4 - Mono	4a - CD14+ Mono	chr21-6498600-6499510	ENST00000636315	U2AF1L5	ENSG00000275895	protein_coding	cds	chr21-6499129-6499172	0	1.90191e-10	0.0586691	0.006	0	3.93495e-05	open
CM vs HM	4 - Mono	4a - CD14+ Mono	chr1-235641732-235642973	ENST00000450593	GNG4	ENSG00000168243	protein_coding	gap	chr1-235595512-235650548	0	1.94459e-10	0.0597879	0.039	0.028	4.02327e-05	open
CM vs HM	4 - Mono	4a - CD14+ Mono	chr6-26351240-26352221	ENST00000396934	BTN3A2	ENSG00000186470	protein_coding	exon	chr6-26365159-26365352	12937	1.97102e-10	0.0828255	0.02	0.008	4.07795e-05	open
CM vs HM	4 - Mono	4a - CD14+ Mono	chr16-66521806-66522855	ENST00000620035	TK2	ENSG00000166548	protein_coding	gap	chr16-66517878-66528993	0	2.00429e-10	0.0597616	0.068	0.058	4.14678e-05	open
CM vs HM	4 - Mono	4a - CD14+ Mono	chr6-80163487-80164555	ENST00000369760	BCKDHB	ENSG00000083123	protein_coding	gap	chr6-80129230-80167677	0	2.03573e-10	0.0829011	0.013	0.002	4.21182e-05	open
CM vs HM	4 - Mono	4a - CD14+ Mono	chr20-32051919-32053378	ENST00000534862	HCK	ENSG00000101336	protein_coding	cds	chr20-32052425-32052486	0	2.05155e-10	-0.245829	0.14	0.28	4.24455e-05	closed
CM vs HM	4 - Mono	4a - CD14+ Mono	chr18-37485026-37485934	ENST00000603232	CELF4	ENSG00000101489	protein_coding	cds	chr18-37485525-37485607	0	2.0782e-10	0.0476945	0.005	0	4.29969e-05	open
CM vs HM	4 - Mono	4a - CD14+ Mono	chr6-14541539-14543420	ENST00000414740	RP11-330A16.1	ENSG00000229646	lincRNA	exon	chr6-14597514-14597599	54093	2.15101e-10	0.0738529	0.012	0.003	4.45034e-05	open
CM vs HM	4 - Mono	4a - CD14+ Mono	chr9-133133244-133134397	ENST00000393160	RALGDS	ENSG00000160271	protein_coding	gap	chr9-133112153-133148962	0	2.16281e-10	0.0256837	0.072	0.072	4.47474e-05	open
CM vs HM	4 - Mono	4a - CD14+ Mono	chr1-35448101-35449085	ENST00000426982	KIAA0319L	ENSG00000142687	protein_coding	cds	chr1-35448173-35448332	0	2.20325e-10	0.0939444	0.032	0.017	4.55842e-05	open
CM vs HM	4 - Mono	4a - CD14+ Mono	chr1-117655877-117656914	ENST00000369448	FAM46C	ENSG00000183508	protein_coding	utr	chr1-117624045-117628372	27504	2.23246e-10	0.0373693	0.017	0.011	4.61884e-05	open
CM vs HM	4 - Mono	4a - CD14+ Mono	chr11-9565649-9566676	ENST00000450114	WEE1	ENSG00000166483	protein_coding	exon	chr11-9573681-9574509	7004	2.25743e-10	0.0682538	0.024	0.012	4.67051e-05	open
CM vs HM	4 - Mono	4a - CD14+ Mono	chr2-233247195-233248344	ENST00000431917	ATG16L1	ENSG00000085978	protein_coding	gap	chr2-233210584-233256101	0	2.32339e-10	0.0666775	0.024	0.013	4.80698e-05	open
CM vs HM	4 - Mono	4a - CD14+ Mono	chr17-41308177-41309185	ENST00000391352	KRTAP16-1	ENSG00000212657	protein_coding	cds	chr17-41307700-41309253	0	2.45474e-10	0.0617954	0.028	0.018	5.07873e-05	open
CM vs HM	4 - Mono	4a - CD14+ Mono	chr19-8085132-8086542	ENST00000601739	FBN3	ENSG00000142449	protein_coding	cds	chr19-8086200-8086325	0	2.48049e-10	0.0645633	0.012	0.003	5.13202e-05	open
CM vs HM	4 - Mono	4a - CD14+ Mono	chr1-179310364-179311463	ENST00000540564	SOAT1	ENSG00000057252	protein_coding	gap	chr1-179302803-179335505	0	2.48464e-10	0.0822033	0.027	0.013	5.14059e-05	open
CM vs HM	4 - Mono	4a - CD14+ Mono	chr11-128302163-128303229	ENST00000608492	RP11-702B10.1	ENSG00000272575	lincRNA	exon	chr11-128241278-128241441	60721	2.49637e-10	0.0446822	0.018	0.011	5.16485e-05	open
CM vs HM	4 - Mono	4a - CD14+ Mono	chr2-241739712-241740728	ENST00000436747	D2HGDH	ENSG00000180902	protein_coding	gap	chr2-241735517-241741032	0	2.50422e-10	0.0753082	0.019	0.007	5.1811e-05	open
CM vs HM	4 - Mono	4a - CD14+ Mono	chr7-43647444-43649234	ENST00000457939	COA1	ENSG00000106603	protein_coding	cds	chr7-43648600-43648614	0	2.5059e-10	0.0403887	0.046	0.04	5.18459e-05	open
CM vs HM	4 - Mono	4a - CD14+ Mono	chr5-157099960-157100955	ENST00000524219	HAVCR2	ENSG00000135077	protein_coding	gap	chr5-157098902-157104665	0	2.54707e-10	0.0515692	0.088	0.078	5.26976e-05	open
CM vs HM	4 - Mono	4a - CD14+ Mono	chr22-42623135-42624256	ENST00000407623	CYB5R3	ENSG00000100243	protein_coding	cds	chr22-42623789-42623888	0	2.5754e-10	-0.296529	0.033	0.117	5.32837e-05	closed
CM vs HM	4 - Mono	4a - CD14+ Mono	chr3-196337994-196339146	ENST00000454715	TM4SF19	ENSG00000145107	protein_coding	utr	chr3-196338264-196338503	0	2.58171e-10	0.100393	0.066	0.044	5.34144e-05	open
CM vs HM	4 - Mono	4a - CD14+ Mono	chr2-172513567-172514641	ENST00000409080	ITGA6	ENSG00000091409	protein_coding	utr	chr2-172504253-172506282	7284	2.68185e-10	0.0437307	0.01	0.003	5.54861e-05	open
CM vs HM	4 - Mono	4a - CD14+ Mono	chr14-91979878-91980853	ENST00000557017	TRIP11	ENSG00000100815	protein_coding	gap	chr14-91977249-91988283	0	2.71009e-10	0.0746902	0.036	0.024	5.60705e-05	open
CM vs HM	4 - Mono	4a - CD14+ Mono	chr1-171793742-171794708	ENST00000367737	METTL13	ENSG00000010165	protein_coding	cds	chr1-171794396-171794527	0	2.72826e-10	0.0647305	0.01	0.002	5.64464e-05	open
CM vs HM	4 - Mono	4a - CD14+ Mono	chr7-151038810-151039959	ENST00000542328	ABCB8	ENSG00000197150	protein_coding	gap	chr7-151036650-151040267	0	2.77747e-10	0.0642438	0.067	0.053	5.74645e-05	open
CM vs HM	4 - Mono	4a - CD14+ Mono	chr8-142325408-142326912	ENST00000524325	TSNARE1	ENSG00000171045	protein_coding	gap	chr8-142318635-142330900	0	2.80036e-10	0.157744	0.075	0.042	5.79381e-05	open
CM vs HM	4 - Mono	4a - CD14+ Mono	chr12-76024779-76025480	ENST00000619060	PHLDA1	ENSG00000139289	protein_coding	utr	chr12-76025447-76030092	0	2.82144e-10	0.0651403	0.016	0.006	5.83742e-05	open
CM vs HM	4 - Mono	4a - CD14+ Mono	chr8-58801108-58802108	ENST00000361421	TOX	ENSG00000198846	protein_coding	utr	chr8-58805418-58807746	3309	2.85954e-10	0.0527582	0.014	0.006	5.91625e-05	open
CM vs HM	4 - Mono	4a - CD14+ Mono	chr19-43764949-43766067	ENST00000615047	KCNN4	ENSG00000104783	protein_coding	utr	chr19-43766533-43767089	465	2.89847e-10	0.0242162	0.081	0.08	5.99679e-05	open
CM vs HM	4 - Mono	4a - CD14+ Mono	chr8-95212770-95213936	ENST00000523171	LINC01298	ENSG00000253351	lincRNA	gap	chr8-95208579-95216317	0	2.95528e-10	-0.20237	0.005	0.044	6.11433e-05	closed
CM vs HM	4 - Mono	4a - CD14+ Mono	chr16-30994143-30995228	ENST00000569638	STX1B	ENSG00000099365	protein_coding	gap	chr16-30993485-30996682	0	2.99121e-10	0.0835156	0.039	0.025	6.18866e-05	open
CM vs HM	4 - Mono	4a - CD14+ Mono	chr17-17712150-17713197	ENST00000471135	RAI1	ENSG00000108557	protein_coding	gap	chr17-17683704-17724027	0	3.04057e-10	0.0963316	0.063	0.046	6.2908e-05	open
CM vs HM	4 - Mono	4a - CD14+ Mono	chr16-31051793-31052803	ENST00000570266	RP11-196G11.2	ENSG00000260911	lincRNA	exon	chr16-31049513-31049868	1924	3.21857e-10	0.09234	0.044	0.029	6.65906e-05	open
CM vs HM	4 - Mono	4a - CD14+ Mono	chr6-168884134-168885262	ENST00000444586	RP3-495K2.3	ENSG00000225879	lincRNA	exon	chr6-168962610-168962901	77347	3.40613e-10	0.0691386	0.026	0.015	7.04712e-05	open
CM vs HM	4 - Mono	4a - CD14+ Mono	chr12-92137117-92137998	ENST00000553207	LINC01619	ENSG00000257242	processed_transcript	gap	chr12-91993530-92142606	0	3.54015e-10	0.0819794	0.051	0.037	7.3244e-05	open
CM vs HM	4 - Mono	4a - CD14+ Mono	chr17-60391711-60392742	ENST00000590133	USP32	ENSG00000170832	protein_coding	cds	chr17-60392339-60392387	0	3.57926e-10	-0.272617	0.213	0.403	7.40531e-05	closed
CM vs HM	4 - Mono	4a - CD14+ Mono	chr3-157128117-157129069	ENST00000471357	LINC00880	ENSG00000243629	lincRNA	exon	chr3-157122876-157123004	5112	3.61489e-10	0.047768	0.019	0.011	7.47904e-05	open
CM vs HM	4 - Mono	4a - CD14+ Mono	chr10-114034549-114035599	ENST00000369295	ADRB1	ENSG00000043591	protein_coding	exon	chr10-114044056-114046908	8456	3.63307e-10	0.0597673	0.015	0.007	7.51664e-05	open
CM vs HM	4 - Mono	4a - CD14+ Mono	chr8-21683652-21684534	ENST00000524240	GFRA2	ENSG00000168546	protein_coding	utr	chr8-21690403-21693277	5868	3.77693e-10	0.0700347	0.027	0.017	7.81428e-05	open
CM vs HM	4 - Mono	4a - CD14+ Mono	chr12-55844995-55846008	ENST00000552872	MMP19	ENSG00000123342	protein_coding	exon	chr12-55842744-55842966	2028	4.04817e-10	0.0454468	0.015	0.008	8.37545e-05	open
CM vs HM	4 - Mono	4a - CD14+ Mono	chr11-9759384-9760349	ENST00000500698	RP11-540A21.2	ENSG00000245522	lincRNA	gap	chr11-9757844-9759428	0	4.07327e-10	0.0679835	0.067	0.051	8.42739e-05	open
CM vs HM	4 - Mono	4a - CD14+ Mono	chr8-26447977-26450175	ENST00000523949	BNIP3L	ENSG00000104765	protein_coding	gap	chr8-26408377-26505306	0	4.23647e-10	-0.245257	0.177	0.337	8.76504e-05	closed
CM vs HM	4 - Mono	4a - CD14+ Mono	chr2-196259995-196261247	ENST00000462290	HECW2	ENSG00000138411	protein_coding	gap	chr2-196257907-196271192	0	4.26064e-10	0.0539973	0.015	0.006	8.81505e-05	open
CM vs HM	4 - Mono	4a - CD14+ Mono	chr8-100885784-100886537	ENST00000395957	YWHAZ	ENSG00000164924	protein_coding	utr	chr8-100916525-100920692	29987	4.30937e-10	0.0772601	0.021	0.009	8.91586e-05	open
CM vs HM	4 - Mono	4a - CD14+ Mono	chr1-54463441-54465266	ENST00000447150	RP4-705F19.1	ENSG00000232245	lincRNA	exon	chr1-54420599-54420860	42580	4.37342e-10	0.0561384	0.047	0.037	9.04838e-05	open
CM vs HM	4 - Mono	4a - CD14+ Mono	chr8-10152043-10152965	ENST00000528246	MSRA	ENSG00000175806	protein_coding	gap	chr8-10096319-10207832	0	4.42731e-10	0.06278	0.03	0.019	9.15988e-05	open
CM vs HM	4 - Mono	4a - CD14+ Mono	chr7-155205113-155206102	ENST00000454149	AC099552.3	ENSG00000228521	lincRNA	exon	chr7-155205040-155205189	0	4.50645e-10	0.0454116	0.241	0.252	9.32363e-05	open
CM vs HM	4 - Mono	4a - CD14+ Mono	chr13-98484446-98485523	ENST00000539966	STK24	ENSG00000102572	protein_coding	gap	chr13-98482322-98519242	0	4.57692e-10	0.0538993	0.156	0.154	9.46942e-05	open
CM vs HM	4 - Mono	4a - CD14+ Mono	chr1-15949154-15950555	ENST00000537142	ZBTB17	ENSG00000116809	protein_coding	gap	chr1-15947124-15973038	0	4.64392e-10	0.045719	0.111	0.101	9.60804e-05	open
CM vs HM	4 - Mono	4a - CD14+ Mono	chr3-71226313-71227416	ENST00000615603	FOXP1	ENSG00000114861	protein_coding	gap	chr3-71198393-71299819	0	4.65164e-10	0.0732626	0.027	0.014	9.62401e-05	open
CM vs HM	4 - Mono	4a - CD14+ Mono	chr15-78454657-78455719	ENST00000560840	IREB2	ENSG00000136381	protein_coding	gap	chr15-78439882-78462921	0	4.71031e-10	-0.261584	0.027	0.098	9.74539e-05	closed
CM vs HM	4 - Mono	4a - CD14+ Mono	chr1-10073944-10074941	ENST00000343090	UBE4B	ENSG00000130939	protein_coding	gap	chr1-10072215-10095460	0	4.73597e-10	0.0668284	0.032	0.021	9.79848e-05	open
CM vs HM	4 - Mono	4a - CD14+ Mono	chr5-178153519-178154540	ENST00000514354	NHP2	ENSG00000145912	protein_coding	cds	chr5-178153658-178153817	0	4.87608e-10	-0.222467	0.221	0.39	0.000100884	closed
CM vs HM	4 - Mono	4a - CD14+ Mono	chr2-36889524-36890606	ENST00000495595	STRN	ENSG00000115808	protein_coding	gap	chr2-36886827-36893897	0	4.87629e-10	0.100481	0.036	0.02	0.000100888	open
CM vs HM	4 - Mono	4a - CD14+ Mono	chr6-105646023-105647114	ENST00000423489	RP3-359N14.2	ENSG00000237567	lincRNA	exon	chr6-105632136-105632196	13826	4.90602e-10	0.0501289	0.014	0.008	0.000101503	open
CM vs HM	4 - Mono	4a - CD14+ Mono	chr2-215843286-215844110	ENST00000445174	LINC00607	ENSG00000235770	lincRNA	gap	chr2-215750418-215843325	0	4.94524e-10	0.0665799	0.01	0.002	0.000102315	open
CM vs HM	4 - Mono	4a - CD14+ Mono	chr1-116497401-116498398	ENST00000456414	RP5-1086K13.1	ENSG00000224950	lincRNA	gap	chr1-116494907-116498801	0	5.04664e-10	0.090691	0.023	0.008	0.000104413	open
CM vs HM	4 - Mono	4a - CD14+ Mono	chr5-132425156-132426153	ENST00000621237	C5orf56	ENSG00000197536	protein_coding	gap	chr5-132419941-132449649	0	5.08333e-10	0.0665122	0.063	0.05	0.000105172	open
CM vs HM	4 - Mono	4a - CD14+ Mono	chr2-37871515-37872491	ENST00000446799	LINC00211	ENSG00000237803	lincRNA	gap	chr2-37865279-37875742	0	5.23604e-10	0.0749607	0.03	0.018	0.000108331	open
CM vs HM	4 - Mono	4a - CD14+ Mono	chr12-120011864-120012857	ENST00000546420	BICDL1	ENSG00000135127	protein_coding	gap	chr12-119999913-120061693	0	5.24086e-10	0.0351271	0.01	0.006	0.000108431	open
CM vs HM	4 - Mono	4a - CD14+ Mono	chr3-71784120-71785818	ENST00000353065	PROK2	ENSG00000163421	protein_coding	cds	chr3-71784957-71785052	0	5.25919e-10	0.0653201	0.086	0.076	0.00010881	open
CM vs HM	4 - Mono	4a - CD14+ Mono	chr5-170466681-170467739	ENST00000518527	KCNIP1	ENSG00000182132	protein_coding	gap	chr5-170353965-170483059	0	5.42613e-10	0.064945	0.082	0.072	0.000112264	open
CM vs HM	4 - Mono	4a - CD14+ Mono	chr22-20867026-20868249	ENST00000490458	SNAP29	ENSG00000099940	protein_coding	gap	chr22-20859348-20870336	0	5.44024e-10	-0.265902	0.041	0.127	0.000112556	closed
CM vs HM	4 - Mono	4a - CD14+ Mono	chr5-67998444-67999568	ENST00000510621	RP11-83M16.6	ENSG00000250421	lincRNA	exon	chr5-67902544-67902600	95843	5.46139e-10	-0.260976	0.128	0.265	0.000112993	closed
CM vs HM	4 - Mono	4a - CD14+ Mono	chr2-98026845-98028015	ENST00000186436	TMEM131	ENSG00000075568	protein_coding	exon	chr2-97995476-97995891	30953	5.5866e-10	-0.272698	0.048	0.147	0.000115584	closed
CM vs HM	4 - Mono	4a - CD14+ Mono	chr10-121737575-121738652	ENST00000543447	ATE1	ENSG00000107669	protein_coding	utr	chr10-121740421-121743679	1768	5.8405e-10	0.0945054	0.034	0.02	0.000120837	open
CM vs HM	4 - Mono	4a - CD14+ Mono	chr6-32636740-32637802	ENST00000496318	HLA-DQA1	ENSG00000196735	protein_coding	cds	chr6-32637459-32637540	0	5.84819e-10	-0.266274	0.02	0.095	0.000120996	closed
CM vs HM	4 - Mono	4a - CD14+ Mono	chr1-160008844-160009746	ENST00000637644	KCNJ10	ENSG00000177807	protein_coding	gap	chr1-159999495-160042045	0	6.27873e-10	-0.180402	0.002	0.031	0.000129904	closed
CM vs HM	4 - Mono	4a - CD14+ Mono	chr5-151202291-151203399	ENST00000524344	CCDC69	ENSG00000198624	protein_coding	gap	chr5-151201689-151205399	0	6.33873e-10	0.0784945	0.031	0.018	0.000131145	open
CM vs HM	4 - Mono	4a - CD14+ Mono	chr7-99624099-99625153	ENST00000394152	ZSCAN25	ENSG00000197037	protein_coding	cds	chr7-99624057-99624180	0	6.34071e-10	0.0411413	0.011	0.006	0.000131186	open
CM vs HM	4 - Mono	4a - CD14+ Mono	chr12-92558562-92559399	ENST00000504409	RP11-693J15.5	ENSG00000205056	lincRNA	exon	chr12-92482018-92492091	66470	6.46333e-10	0.0339706	0.005	0.001	0.000133723	open
CM vs HM	4 - Mono	4a - CD14+ Mono	chr16-15960811-15961905	ENST00000399410	ABCC1	ENSG00000103222	protein_coding	gap	chr16-15949800-16007815	0	6.46994e-10	0.0467076	0.012	0.006	0.00013386	open
CM vs HM	4 - Mono	4a - CD14+ Mono	chr5-126809554-126810586	ENST00000460265	LMNB1	ENSG00000113368	protein_coding	cds	chr5-126810180-126810350	0	6.5869e-10	-0.217004	0.007	0.053	0.00013628	closed
CM vs HM	4 - Mono	4a - CD14+ Mono	chr10-119028955-119030033	ENST00000425699	NANOS1	ENSG00000188613	protein_coding	cds	chr10-119029802-119030680	0	6.68652e-10	0.0545745	0.048	0.04	0.000138341	open
CM vs HM	4 - Mono	4a - CD14+ Mono	chr1-181123902-181125087	ENST00000367577	IER5	ENSG00000162783	protein_coding	utr	chr1-181089887-181092899	31002	6.77356e-10	-0.263409	0.039	0.125	0.000140142	closed
CM vs HM	4 - Mono	4a - CD14+ Mono	chr7-114932838-114933708	ENST00000614186	MDFIC	ENSG00000135272	protein_coding	gap	chr7-114923128-114942274	0	7.02904e-10	0.0778647	0.048	0.035	0.000145427	open
CM vs HM	4 - Mono	4a - CD14+ Mono	chr19-54450995-54452044	ENST00000616932	LENG8	ENSG00000167615	protein_coding	cds	chr19-54451345-54451382	0	7.2461e-10	0.0841221	0.075	0.06	0.000149918	open
CM vs HM	4 - Mono	4a - CD14+ Mono	chr17-19336631-19337490	ENST00000395626	EPN2	ENSG00000072134	protein_coding	utr	chr17-19335449-19336715	0	7.3514e-10	0.0927014	0.015	0.003	0.000152097	open
CM vs HM	4 - Mono	4a - CD14+ Mono	chr11-86743132-86744148	ENST00000532979	CTD-2005H7.2	ENSG00000255250	lincRNA	gap	chr11-86727523-86761950	0	7.50527e-10	0.0686837	0.032	0.022	0.00015528	open
CM vs HM	4 - Mono	4a - CD14+ Mono	chr6-167150746-167151979	ENST00000539001	TCP10L2	ENSG00000166984	protein_coding	gap	chr6-167149485-167164400	0	7.63003e-10	0.0436765	0.014	0.007	0.000157862	open
CM vs HM	4 - Mono	4a - CD14+ Mono	chr15-60840431-60841626	ENST00000561093	RORA	ENSG00000069667	protein_coding	gap	chr15-60678687-61229052	0	7.7529e-10	0.0360399	0.01	0.005	0.000160404	open
CM vs HM	4 - Mono	4a - CD14+ Mono	chr10-17026362-17027487	ENST00000377833	CUBN	ENSG00000107611	protein_coding	gap	chr10-17019984-17041032	0	8.00101e-10	0.0313324	0.076	0.074	0.000165537	open
CM vs HM	4 - Mono	4a - CD14+ Mono	chr5-134132056-134133090	ENST00000522653	TCF7	ENSG00000081059	protein_coding	gap	chr5-134116034-134138058	0	8.03745e-10	0.0408391	0.017	0.01	0.000166291	open
CM vs HM	4 - Mono	4a - CD14+ Mono	chr21-43368861-43369799	ENST00000435702	AP001046.6	ENSG00000225637	lincRNA	exon	chr21-43366107-43366566	2294	8.99587e-10	0.0602086	0.02	0.01	0.00018612	open
CM vs HM	4 - Mono	4a - CD14+ Mono	chr8-100409504-100410663	ENST00000519844	KB-173C10.2	ENSG00000253824	lincRNA	gap	chr8-100381772-100410734	0	9.08498e-10	0.0560004	0.009	0.002	0.000187964	open
CM vs HM	4 - Mono	4a - CD14+ Mono	chr2-149068932-149070112	ENST00000473800	LYPD6B	ENSG00000150556	protein_coding	gap	chr2-149038135-149077519	0	9.135e-10	-0.203762	0.007	0.046	0.000188999	closed
CM vs HM	4 - Mono	4a - CD14+ Mono	chr13-97433763-97434489	ENST00000476869	RAP2A	ENSG00000125249	protein_coding	cds	chr13-97434471-97434784	0	9.30499e-10	0.0711388	0.172	0.168	0.000192516	open
CM vs HM	4 - Mono	4a - CD14+ Mono	chr7-35253533-35254738	ENST00000408931	TBX20	ENSG00000164532	protein_coding	cds	chr7-35253494-35253620	0	9.34462e-10	0.0993941	0.046	0.03	0.000193336	open
CM vs HM	4 - Mono	4a - CD14+ Mono	chr10-110512474-110513460	ENST00000369583	DUSP5	ENSG00000138166	protein_coding	utr	chr10-110510427-110511544	929	9.50346e-10	0.0820761	0.024	0.011	0.000196622	open
CM vs HM	4 - Mono	4a - CD14+ Mono	chr1-31387378-31388295	ENST00000482018	FABP3	ENSG00000121769	protein_coding	exon	chr1-31376722-31376850	10527	1.0234e-09	0.0528461	0.011	0.004	0.000211736	open
CM vs HM	4 - Mono	4a - CD14+ Mono	chr1-34681114-34682100	ENST00000426886	SMIM12	ENSG00000163866	protein_coding	utr	chr1-34712737-34714620	30636	1.11501e-09	0.0301043	0.004	0	0.000230689	open
CM vs HM	4 - Mono	4a - CD14+ Mono	chr2-145744809-145745912	ENST00000418416	AC079163.1	ENSG00000226218	lincRNA	exon	chr2-145603238-145603423	141385	1.14214e-09	0.0617559	0.02	0.011	0.000236303	open
CM vs HM	4 - Mono	4a - CD14+ Mono	chr6-27250722-27252286	ENST00000485993	PRSS16	ENSG00000112812	protein_coding	cds	chr6-27250683-27250806	0	1.16868e-09	0.058294	0.012	0.004	0.000241794	open
CM vs HM	4 - Mono	4a - CD14+ Mono	chr2-225010830-225011547	ENST00000492369	DOCK10	ENSG00000135905	protein_coding	gap	chr2-224931669-225042251	0	1.18409e-09	0.0590402	0.008	0.001	0.000244982	open
CM vs HM	4 - Mono	4a - CD14+ Mono	chr2-110846452-110847624	ENST00000439055	ACOXL	ENSG00000153093	protein_coding	gap	chr2-110841406-110908788	0	1.18485e-09	0.0476922	0.011	0.005	0.000245139	open
CM vs HM	4 - Mono	4a - CD14+ Mono	chr1-8152474-8153544	ENST00000445300	RP11-431K24.1	ENSG00000238290	lincRNA	exon	chr1-8121474-8122702	29771	1.18903e-09	0.0498552	0.018	0.011	0.000246004	open
CM vs HM	4 - Mono	4a - CD14+ Mono	chr8-100623002-100624233	ENST00000520661	SNX31	ENSG00000174226	protein_coding	gap	chr8-100617731-100630326	0	1.21127e-09	0.0744469	0.024	0.013	0.000250605	open
CM vs HM	4 - Mono	4a - CD14+ Mono	chr14-68396961-68398108	ENST00000557045	RAD51B	ENSG00000182185	protein_coding	gap	chr14-68291981-68411423	0	1.23255e-09	-0.243047	0.091	0.204	0.000255008	closed
CM vs HM	4 - Mono	4a - CD14+ Mono	chr12-57279741-57280918	ENST00000634871	R3HDM2	ENSG00000179912	protein_coding	cds	chr12-57280358-57280530	0	1.24899e-09	0.0437239	0.01	0.003	0.000258411	open
CM vs HM	4 - Mono	4a - CD14+ Mono	chr1-224564851-224565905	ENST00000498382	CNIH3	ENSG00000143786	protein_coding	gap	chr1-224529421-224680957	0	1.27698e-09	0.0842073	0.111	0.098	0.000264201	open
CM vs HM	4 - Mono	4a - CD14+ Mono	chr3-184459106-184460029	ENST00000419960	RP11-433C9.2	ENSG00000224153	lincRNA	exon	chr3-184439244-184439648	19457	1.35503e-09	0.043322	0.009	0.003	0.000280348	open
CM vs HM	4 - Mono	4a - CD14+ Mono	chr17-17662998-17664062	ENST00000456090	SMCR2	ENSG00000223979	lincRNA	exon	chr17-17674026-17674156	9963	1.36131e-09	0.0496029	0.048	0.039	0.000281648	open
CM vs HM	4 - Mono	4a - CD14+ Mono	chr5-62538058-62539145	ENST00000511713	IPO11	ENSG00000086200	protein_coding	gap	chr5-62515502-62550366	0	1.41e-09	0.0790619	0.038	0.025	0.000291721	open
CM vs HM	4 - Mono	4a - CD14+ Mono	chr1-117077008-117077950	ENST00000369466	TTF2	ENSG00000116830	protein_coding	cds	chr1-117077916-117078043	0	1.50634e-09	0.0766888	0.014	0.004	0.000311654	open
CM vs HM	4 - Mono	4a - CD14+ Mono	chr1-203673697-203674719	ENST00000367218	ATP2B4	ENSG00000058668	protein_coding	gap	chr1-203627220-203682741	0	1.53178e-09	0.0595844	0.049	0.039	0.000316917	open
CM vs HM	4 - Mono	4a - CD14+ Mono	chr1-156140905-156141990	ENST00000368300	LMNA	ENSG00000160789	protein_coding	utr	chr1-156139107-156140089	815	1.54625e-09	0.0651539	0.025	0.015	0.000319912	open
CM vs HM	4 - Mono	4a - CD14+ Mono	chr2-172697893-172699000	ENST00000484331	RAPGEF4	ENSG00000091428	protein_coding	exon	chr2-172735274-172735405	36273	1.54996e-09	0.0507511	0.015	0.007	0.000320678	open
CM vs HM	4 - Mono	4a - CD14+ Mono	chr6-166257540-166258163	ENST00000444219	RP4-655C5.4	ENSG00000233365	lincRNA	exon	chr6-166256741-166256947	592	1.55434e-09	0.0700577	0.013	0.004	0.000321585	open
CM vs HM	4 - Mono	4a - CD14+ Mono	chr9-105052789-105054037	ENST00000457720	RP11-217B7.3	ENSG00000230013	lincRNA	exon	chr9-104991684-104991781	61007	1.61501e-09	0.0731054	0.09	0.08	0.000334138	open
CM vs HM	4 - Mono	4a - CD14+ Mono	chr21-38853169-38854130	ENST00000416842	AP001042.1	ENSG00000229986	lincRNA	exon	chr21-38848229-38848644	4524	1.62679e-09	0.061506	0.011	0.003	0.000336574	open
CM vs HM	4 - Mono	4a - CD14+ Mono	chr1-222817207-222818212	ENST00000495684	RP11-455P21.3	ENSG00000278610	lincRNA	gap	chr1-222815079-222823883	0	1.67227e-09	0.0466947	0.014	0.007	0.000345985	open
CM vs HM	4 - Mono	4a - CD14+ Mono	chr6-43312439-43313446	ENST00000607252	ZNF318	ENSG00000171467	protein_coding	gap	chr6-43308410-43318301	0	1.7244e-09	-0.290997	0.07	0.185	0.000356769	closed
CM vs HM	4 - Mono	4a - CD14+ Mono	chr17-59828946-59830016	ENST00000592619	VMP1	ENSG00000062716	protein_coding	gap	chr17-59817774-59838294	0	1.75744e-09	0.0543301	0.092	0.087	0.000363606	open
CM vs HM	4 - Mono	4a - CD14+ Mono	chr3-4821601-4822800	ENST00000544951	ITPR1	ENSG00000150995	protein_coding	gap	chr3-4818243-4836773	0	1.76859e-09	0.0451564	0.013	0.007	0.000365913	open
CM vs HM	4 - Mono	4a - CD14+ Mono	chr10-114631571-114632603	ENST00000533213	ABLIM1	ENSG00000099204	protein_coding	gap	chr10-114601962-114684289	0	1.80964e-09	0.0601643	0.01	0.002	0.000374405	open
CM vs HM	4 - Mono	4a - CD14+ Mono	chr17-80826621-80827479	ENST00000577161	RPTOR	ENSG00000141564	protein_coding	gap	chr17-80823224-80837921	0	1.8335e-09	0.0662556	0.015	0.005	0.000379341	open
CM vs HM	4 - Mono	4a - CD14+ Mono	chr21-42737773-42738850	ENST00000497805	PDE9A	ENSG00000160191	protein_coding	gap	chr21-42733427-42743775	0	1.8427e-09	-0.242112	0.019	0.078	0.000381246	closed
CM vs HM	4 - Mono	4a - CD14+ Mono	chr7-131235369-131236410	ENST00000421797	MKLN1	ENSG00000128585	protein_coding	gap	chr7-131142942-131375423	0	1.84748e-09	0.0277462	0.041	0.038	0.000382235	open
CM vs HM	4 - Mono	4a - CD14+ Mono	chr19-35903257-35904353	ENST00000437550	HCST	ENSG00000126264	protein_coding	cds	chr19-35904123-35904160	0	1.85754e-09	-0.303914	0.107	0.247	0.000384316	closed
CM vs HM	4 - Mono	4a - CD14+ Mono	chr7-151727369-151728380	ENST00000492843	PRKAG2	ENSG00000106617	protein_coding	gap	chr7-151675638-151735899	0	1.85843e-09	0.0562646	0.071	0.059	0.0003845	open
CM vs HM	4 - Mono	4a - CD14+ Mono	chr3-58052171-58053072	ENST00000490882	FLNB	ENSG00000136068	protein_coding	gap	chr3-58008857-58077045	0	1.90217e-09	0.0652467	0.025	0.015	0.000393549	open
CM vs HM	4 - Mono	4a - CD14+ Mono	chr22-38181426-38182408	ENST00000447598	PLA2G6	ENSG00000184381	protein_coding	utr	chr22-38181784-38181808	0	1.91257e-09	-0.238269	0.206	0.365	0.000395702	closed
CM vs HM	4 - Mono	4a - CD14+ Mono	chr14-99271700-99272847	ENST00000443726	BCL11B	ENSG00000127152	protein_coding	exon	chr14-99271161-99271524	175	1.94442e-09	0.0390923	0.015	0.01	0.00040229	open
CM vs HM	4 - Mono	4a - CD14+ Mono	chr13-28590358-28591213	ENST00000380842	POMP	ENSG00000132963	protein_coding	exon	chr13-28659104-28659187	67890	1.99073e-09	0.0544198	0.01	0.003	0.000411872	open
CM vs HM	4 - Mono	4a - CD14+ Mono	chr6-31305506-31306335	ENST00000539514	XXbac-BPG248L24.13	ENSG00000256166	lincRNA	exon	chr6-31301472-31301642	3863	2.00029e-09	0.0820373	0.032	0.018	0.00041385	open
CM vs HM	4 - Mono	4a - CD14+ Mono	chr17-40607699-40608779	ENST00000348513	SMARCE1	ENSG00000073584	protein_coding	utr	chr17-40624962-40628784	16182	2.01443e-09	0.0315469	0.015	0.011	0.000416776	open
CM vs HM	4 - Mono	4a - CD14+ Mono	chr17-74786056-74787285	ENST00000582773	TMEM104	ENSG00000109066	protein_coding	gap	chr17-74785604-74788788	0	2.04357e-09	-0.265974	0.08	0.187	0.000422805	closed
CM vs HM	4 - Mono	4a - CD14+ Mono	chr3-45113558-45114379	ENST00000490471	CDCP1	ENSG00000163814	protein_coding	gap	chr3-45112446-45118411	0	2.04432e-09	0.101761	0.019	0.006	0.00042296	open
CM vs HM	4 - Mono	4a - CD14+ Mono	chr5-158384440-158385723	ENST00000619068	RP11-524N5.1	ENSG00000276778	lincRNA	gap	chr5-158369611-158409645	0	2.09164e-09	0.0642766	0.088	0.079	0.00043275	open
CM vs HM	4 - Mono	4a - CD14+ Mono	chr16-28309551-28310739	ENST00000341901	SBK1	ENSG00000188322	protein_coding	gap	chr16-28293301-28317384	0	2.09343e-09	0.0325862	0.014	0.01	0.00043312	open
CM vs HM	4 - Mono	4a - CD14+ Mono	chr20-47767872-47768992	ENST00000484875	SULF2	ENSG00000196562	protein_coding	gap	chr20-47757464-47786047	0	2.09645e-09	-0.280465	0.046	0.143	0.000433745	closed
CM vs HM	4 - Mono	4a - CD14+ Mono	chr2-96537776-96538312	ENST00000454558	ARID5A	ENSG00000196843	protein_coding	utr	chr2-96537345-96538321	0	2.13144e-09	0.0677599	0.046	0.034	0.000440984	open
CM vs HM	4 - Mono	4a - CD14+ Mono	chr1-1207778-1208697	ENST00000379268	TNFRSF18	ENSG00000186891	protein_coding	exon	chr1-1206385-1206691	1086	2.13326e-09	0.0510218	0.016	0.008	0.000441362	open
CM vs HM	4 - Mono	4a - CD14+ Mono	chr16-3992014-3993018	ENST00000572288	ADCY9	ENSG00000162104	protein_coding	cds	chr16-3992222-3992363	0	2.13518e-09	0.149366	0.028	0.006	0.000441757	open
CM vs HM	4 - Mono	4a - CD14+ Mono	chr2-231683975-231685014	ENST00000466801	PTMA	ENSG00000187514	protein_coding	exon	chr2-231706895-231707228	21880	2.15385e-09	0.0631756	0.011	0.003	0.00044562	open
CM vs HM	4 - Mono	4a - CD14+ Mono	chr6-28383018-28384061	ENST00000396827	ZSCAN12	ENSG00000158691	protein_coding	gap	chr6-28382610-28390595	0	2.16102e-09	-0.278311	0.048	0.138	0.000447103	closed
CM vs HM	4 - Mono	4a - CD14+ Mono	chr1-9162375-9163361	ENST00000635687	MIR34A	ENSG00000228526	lincRNA	gap	chr1-9151836-9182006	0	2.17909e-09	-0.226441	0.011	0.057	0.000450843	closed
CM vs HM	4 - Mono	4a - CD14+ Mono	chr10-132664226-132665053	ENST00000423490	INPP5A	ENSG00000068383	protein_coding	gap	chr10-132607957-132690391	0	2.19511e-09	0.0662256	0.008	0	0.000454158	open
CM vs HM	4 - Mono	4a - CD14+ Mono	chr8-127854009-127854921	ENST00000524165	PVT1	ENSG00000249859	lincRNA	gap	chr8-127796009-127855154	0	2.24129e-09	0.0524719	0.01	0.003	0.000463711	open
CM vs HM	4 - Mono	4a - CD14+ Mono	chr2-196067971-196069019	ENST00000410072	DNAH7	ENSG00000118997	protein_coding	cds	chr2-196068697-196068711	0	2.24268e-09	-0.284698	0.096	0.23	0.000463999	closed
CM vs HM	4 - Mono	4a - CD14+ Mono	chr8-124824866-124826682	ENST00000533516	RP11-1082L8.3	ENSG00000255491	lincRNA	gap	chr8-124815750-124830103	0	2.26189e-09	0.0772571	0.06	0.042	0.000467974	open
CM vs HM	4 - Mono	4a - CD14+ Mono	chr8-54701301-54702187	ENST00000637698	RP1	ENSG00000104237	protein_coding	cds	chr8-54701486-54701662	0	2.35761e-09	0.0359921	0.005	0.001	0.000487778	open
CM vs HM	4 - Mono	4a - CD14+ Mono	chr4-95522531-95523519	ENST00000513796	UNC5C	ENSG00000182168	protein_coding	gap	chr4-95335632-95548733	0	2.36759e-09	0.0289501	0.004	0	0.000489843	open
CM vs HM	4 - Mono	4a - CD14+ Mono	chr17-19004164-19005319	ENST00000388995	FAM83G	ENSG00000188522	protein_coding	utr	chr17-19004709-19004804	0	2.37179e-09	0.0224205	0.039	0.034	0.000490711	open
CM vs HM	4 - Mono	4a - CD14+ Mono	chr20-57708474-57709213	ENST00000472841	PMEPA1	ENSG00000124225	protein_coding	gap	chr20-57659698-57711323	0	2.40233e-09	0.0531517	0.011	0.003	0.00049703	open
CM vs HM	4 - Mono	4a - CD14+ Mono	chr2-112879650-112880574	ENST00000263326	IL37	ENSG00000125571	protein_coding	exon	chr2-112912971-112913094	32396	2.4351e-09	0.0704293	0.028	0.016	0.00050381	open
CM vs HM	4 - Mono	4a - CD14+ Mono	chr5-127936191-127937283	ENST00000514853	CCDC192	ENSG00000230561	protein_coding	gap	chr5-127875662-127941181	0	2.44625e-09	0.059236	0.007	0	0.000506116	open
CM vs HM	4 - Mono	4a - CD14+ Mono	chr19-50510731-50511821	ENST00000601207	ASPDH	ENSG00000204653	protein_coding	cds	chr19-50511732-50511773	0	2.46036e-09	-0.253043	0.23	0.412	0.000509036	closed
CM vs HM	4 - Mono	4a - CD14+ Mono	chr1-156550986-156552342	ENST00000491900	IQGAP3	ENSG00000183856	protein_coding	cds	chr1-156551974-156552095	0	2.48308e-09	0.0364703	0.03	0.024	0.000513736	open
CM vs HM	4 - Mono	4a - CD14+ Mono	chr4-1081068-1081901	ENST00000433731	RNF212	ENSG00000178222	protein_coding	cds	chr4-1081567-1081619	0	2.49124e-09	0.0632599	0.031	0.02	0.000515424	open
CM vs HM	4 - Mono	4a - CD14+ Mono	chr5-144189530-144190549	ENST00000512467	KCTD16	ENSG00000183775	protein_coding	gap	chr5-144174473-144206388	0	2.51502e-09	0.0491706	0.057	0.048	0.000520345	open
CM vs HM	4 - Mono	4a - CD14+ Mono	chr18-35478113-35479390	ENST00000592173	INO80C	ENSG00000153391	protein_coding	cds	chr18-35479300-35479411	0	2.53532e-09	0.0739251	0.069	0.055	0.000524546	open
CM vs HM	4 - Mono	4a - CD14+ Mono	chr12-96416147-96416999	ENST00000548740	RP11-510I5.4	ENSG00000258272	lincRNA	exon	chr12-96422326-96422391	5326	2.61887e-09	0.0495836	0.012	0.005	0.000541831	open
CM vs HM	4 - Mono	4a - CD14+ Mono	chr2-157182440-157183497	ENST00000259056	GALNT5	ENSG00000136542	protein_coding	exon	chr2-157257598-157259536	74100	2.6294e-09	0.0804602	0.053	0.038	0.000544009	open
CM vs HM	4 - Mono	4a - CD14+ Mono	chrX-1462503-1463541	ENST00000381297	P2RY8	ENSG00000182162	protein_coding	utr	chrX-1462572-1465478	0	2.65889e-09	0.0374856	0.017	0.011	0.00055011	open
CM vs HM	4 - Mono	4a - CD14+ Mono	chr1-212255939-212257255	ENST00000431307	RP11-15I11.3	ENSG00000226251	lincRNA	exon	chr1-212238907-212238977	16961	2.74144e-09	-0.266054	0.06	0.153	0.000567191	closed
CM vs HM	4 - Mono	4a - CD14+ Mono	chr4-1055442-1056525	ENST00000514757	RNF212	ENSG00000178222	protein_coding	gap	chr4-1056504-1056837	0	2.76584e-09	0.0388159	0.024	0.018	0.000572239	open
CM vs HM	4 - Mono	4a - CD14+ Mono	chr18-23257695-23258802	ENST00000579963	CABLES1	ENSG00000134508	protein_coding	utr	chr18-23257227-23258654	0	2.77237e-09	0.0851523	0.073	0.056	0.00057359	open
CM vs HM	4 - Mono	4a - CD14+ Mono	chr2-164935205-164936137	ENST00000493887	SLC38A11	ENSG00000169507	protein_coding	gap	chr2-164915974-164937349	0	2.78045e-09	0.0456343	0.005	0	0.000575262	open
CM vs HM	4 - Mono	4a - CD14+ Mono	chr15-50137077-50138036	ENST00000558829	ATP8B4	ENSG00000104043	protein_coding	gap	chr15-50107009-50182260	0	2.78399e-09	0.0451003	0.009	0.003	0.000575994	open
CM vs HM	4 - Mono	4a - CD14+ Mono	chr18-48990175-48991208	ENST00000587659	RP11-1058N17.1	ENSG00000266905	lincRNA	exon	chr18-48963820-48963941	26233	2.84914e-09	0.051558	0.017	0.009	0.000589473	open
CM vs HM	4 - Mono	4a - CD14+ Mono	chr11-35159831-35160972	ENST00000528086	CD44	ENSG00000026508	protein_coding	gap	chr11-35139371-35176574	0	2.87981e-09	0.0766672	0.019	0.007	0.000595818	open
CM vs HM	4 - Mono	4a - CD14+ Mono	chr5-124628754-124629731	ENST00000513985	ZNF608	ENSG00000168916	protein_coding	exon	chr5-124636913-124637906	7181	2.91292e-09	0.0774903	0.02	0.008	0.000602669	open
CM vs HM	4 - Mono	4a - CD14+ Mono	chr3-193869470-193870463	ENST00000445168	RP11-528A4.2	ENSG00000229155	lincRNA	exon	chr3-193843652-193844024	25445	3.0495e-09	0.0609613	0.019	0.009	0.000630926	open
CM vs HM	4 - Mono	4a - CD14+ Mono	chr5-159209184-159210189	ENST00000518802	RNF145	ENSG00000145860	protein_coding	cds	chr5-159209853-159209903	0	3.08364e-09	0.0415334	0.113	0.115	0.00063799	open
CM vs HM	4 - Mono	4a - CD14+ Mono	chr10-97882394-97883288	ENST00000370597	CRTAC1	ENSG00000095713	protein_coding	cds	chr10-97882786-97882828	0	3.16944e-09	0.0433079	0.006	0.001	0.000655742	open
CM vs HM	4 - Mono	4a - CD14+ Mono	chr10-70602378-70604163	ENST00000441259	PRF1	ENSG00000180644	protein_coding	utr	chr10-70602645-70602775	0	3.18872e-09	0.059778	0.015	0.007	0.00065973	open
CM vs HM	4 - Mono	4a - CD14+ Mono	chr2-1550443-1551427	ENST00000422464	TPO	ENSG00000115705	protein_coding	utr	chr2-1540916-1543711	6731	3.30083e-09	0.0503371	0.011	0.004	0.000682925	open
CM vs HM	4 - Mono	4a - CD14+ Mono	chr1-161069397-161070453	ENST00000490279	ARHGAP30	ENSG00000186517	protein_coding	cds	chr1-161069528-161069624	0	3.33476e-09	-0.253657	0.145	0.288	0.000689946	closed
CM vs HM	4 - Mono	4a - CD14+ Mono	chr3-197083293-197084067	ENST00000493937	DLG1	ENSG00000075711	protein_coding	gap	chr3-197081118-197085579	0	3.35371e-09	0.0402324	0.005	0.001	0.000693866	open
CM vs HM	4 - Mono	4a - CD14+ Mono	chr5-149455695-149456628	ENST00000602315	CARMN	ENSG00000249669	lincRNA	exon	chr5-149430915-149432835	22859	3.36958e-09	0.0385901	0.004	0	0.000697148	open
CM vs HM	4 - Mono	4a - CD14+ Mono	chr10-75375504-75376612	ENST00000418818	RP11-399K21.11	ENSG00000270087	lincRNA	gap	chr10-75283384-75401104	0	3.49409e-09	-0.273487	0.033	0.115	0.00072291	closed
CM vs HM	4 - Mono	4a - CD14+ Mono	chr21-43732881-43734984	ENST00000468090	PDXK	ENSG00000160209	protein_coding	cds	chr21-43734069-43734123	0	3.65015e-09	0.0673142	0.019	0.009	0.000755198	open
CM vs HM	4 - Mono	4a - CD14+ Mono	chr6-109686962-109687934	ENST00000532976	AK9	ENSG00000155085	protein_coding	gap	chr6-109675757-109690471	0	3.67683e-09	0.0633229	0.028	0.018	0.000760717	open
CM vs HM	4 - Mono	4a - CD14+ Mono	chr2-196054423-196055366	ENST00000427816	DNAH7	ENSG00000118997	protein_coding	gap	chr2-196051250-196058053	0	3.76517e-09	-0.164004	0.001	0.027	0.000778995	closed
CM vs HM	4 - Mono	4a - CD14+ Mono	chr1-221987556-221988657	ENST00000441160	RP11-400N13.2	ENSG00000228437	lincRNA	exon	chr1-221984054-221984964	2591	3.81921e-09	0.0900672	0.026	0.011	0.000790175	open
CM vs HM	4 - Mono	4a - CD14+ Mono	chr4-2497593-2498653	ENST00000541204	RNF4	ENSG00000063978	protein_coding	gap	chr4-2497122-2500658	0	3.85041e-09	-0.262004	0.043	0.131	0.00079663	closed
CM vs HM	4 - Mono	4a - CD14+ Mono	chr3-114214646-114215760	ENST00000460779	DRD3	ENSG00000151577	protein_coding	exon	chr3-114199273-114199407	15238	3.89654e-09	0.045854	0.016	0.01	0.000806175	open
CM vs HM	4 - Mono	4a - CD14+ Mono	chr5-49601262-49602134	ENST00000303221	EMB	ENSG00000170571	protein_coding	utr	chr5-50396192-50399272	794057	3.90128e-09	0.118589	0.045	0.022	0.000807156	open
CM vs HM	4 - Mono	4a - CD14+ Mono	chr8-2195209-2196261	ENST00000520779	MYOM2	ENSG00000036448	protein_coding	exon	chr8-2165153-2165552	29656	3.91335e-09	0.0409458	0.005	0	0.000809653	open
CM vs HM	4 - Mono	4a - CD14+ Mono	chr7-2109834-2111702	ENST00000491858	MAD1L1	ENSG00000002822	protein_coding	gap	chr7-2069339-2149151	0	3.9363e-09	0.0560204	0.032	0.021	0.000814401	open
CM vs HM	4 - Mono	4a - CD14+ Mono	chr10-8331975-8332962	ENST00000413941	RP5-1119O21.2	ENSG00000226861	lincRNA	exon	chr10-8300998-8301667	30307	4.02192e-09	0.039901	0.023	0.017	0.000832115	open
CM vs HM	4 - Mono	4a - CD14+ Mono	chr1-17465018-17466081	ENST00000375436	RCC2	ENSG00000179051	protein_coding	exon	chr1-17439545-17439724	25293	4.05975e-09	0.115405	0.02	0.004	0.000839941	open
CM vs HM	4 - Mono	4a - CD14+ Mono	chr16-3157102-3158126	ENST00000570843	RP11-473M20.16	ENSG00000261889	lincRNA	exon	chr16-3156736-3157483	0	4.28243e-09	0.0340005	0.048	0.045	0.000886014	open
CM vs HM	4 - Mono	4a - CD14+ Mono	chr10-93470811-93471892	ENST00000488645	MYOF	ENSG00000138119	protein_coding	gap	chr10-93456938-93478179	0	4.34743e-09	0.0866816	0.045	0.03	0.000899462	open
CM vs HM	4 - Mono	4a - CD14+ Mono	chr6-16699056-16699909	ENST00000495178	ATXN1	ENSG00000124788	protein_coding	gap	chr6-16657902-16753232	0	4.53552e-09	0.0551484	0.032	0.022	0.000938375	open
CM vs HM	4 - Mono	4a - CD14+ Mono	chr3-186882725-186884329	ENST00000444204	ADIPOQ	ENSG00000181092	protein_coding	utr	chr3-186854705-186858463	24261	4.59565e-09	0.0633491	0.012	0.004	0.000950818	open
CM vs HM	4 - Mono	4a - CD14+ Mono	chr4-84691052-84692119	ENST00000514711	WDFY3	ENSG00000163625	protein_coding	cds	chr4-84691726-84691785	0	4.64826e-09	0.100069	0.05	0.032	0.000961702	open
CM vs HM	4 - Mono	4a - CD14+ Mono	chr14-73568823-73570121	ENST00000622407	ACOT2	ENSG00000119673	protein_coding	cds	chr14-73569427-73569883	0	4.66862e-09	0.0516214	0.048	0.038	0.000965914	open
CM vs HM	4 - Mono	4a - CD14+ Mono	chr12-92501298-92503235	ENST00000504409	RP11-693J15.5	ENSG00000205056	lincRNA	exon	chr12-92482018-92492091	9206	4.67997e-09	0.0771957	0.053	0.04	0.000968262	open
CM vs HM	4 - Mono	4a - CD14+ Mono	chr5-40689362-40690150	ENST00000637375	TTC33	ENSG00000113638	protein_coding	gap	chr5-40569582-40746797	0	4.84925e-09	0.0676645	0.028	0.018	0.00100329	open
CM vs HM	4 - Mono	4a - CD14+ Mono	chr9-89153220-89154294	ENST00000375835	SHC3	ENSG00000148082	protein_coding	gap	chr9-89112627-89177986	0	5.03761e-09	0.0580185	0.036	0.027	0.00104226	open
CM vs HM	4 - Mono	4a - CD14+ Mono	chr5-157186424-157187400	ENST00000522616	ITK	ENSG00000113263	protein_coding	gap	chr5-157181116-157195084	0	5.16279e-09	0.0353055	0.006	0.001	0.00106816	open
CM vs HM	4 - Mono	4a - CD14+ Mono	chr10-127990001-127992283	ENST00000471218	PTPRE	ENSG00000132334	protein_coding	gap	chr10-127987396-128040874	0	5.36353e-09	0.0709296	0.035	0.023	0.00110969	open
CM vs HM	4 - Mono	4a - CD14+ Mono	chr2-237898312-237899344	ENST00000409726	RAMP1	ENSG00000132329	protein_coding	gap	chr2-237877363-237911527	0	5.45108e-09	-0.272269	0.049	0.139	0.0011278	closed
CM vs HM	4 - Mono	4a - CD14+ Mono	chr16-79271811-79272822	ENST00000410312	RNA5SP431	ENSG00000222244	rRNA	exon	chr16-79264454-79264573	7237	5.45747e-09	0.0527759	0.011	0.004	0.00112912	open
CM vs HM	4 - Mono	4a - CD14+ Mono	chr19-2315521-2316706	ENST00000621615	LLfos-48D6.2	ENSG00000273734	protein_coding	gap	chr19-2269745-2334601	0	5.49408e-09	-0.256081	0.086	0.197	0.0011367	closed
CM vs HM	4 - Mono	4a - CD14+ Mono	chr17-78331716-78332650	ENST00000586321	AC061992.2	ENSG00000267737	lincRNA	gap	chr17-78315789-78343964	0	5.49647e-09	-0.239017	0.01	0.057	0.00113719	closed
CM vs HM	4 - Mono	4a - CD14+ Mono	chr19-35318482-35319647	ENST00000598537	CD22	ENSG00000012124	protein_coding	utr	chr19-35319261-35319432	0	5.6256e-09	0.0355074	0.094	0.089	0.00116391	open
CM vs HM	4 - Mono	4a - CD14+ Mono	chr12-90090134-90092156	ENST00000548722	RP11-567C2.1	ENSG00000257194	lincRNA	exon	chr12-90107739-90107821	15582	5.63143e-09	0.0395244	0.036	0.027	0.00116511	open
CM vs HM	4 - Mono	4a - CD14+ Mono	chr2-217085609-217086780	ENST00000564299	RP11-574O16.1	ENSG00000259855	lincRNA	exon	chr2-216995906-216996490	89118	5.68135e-09	0.0792642	0.022	0.01	0.00117544	open
CM vs HM	4 - Mono	4a - CD14+ Mono	chr14-35196357-35197527	ENST00000605870	KIAA0391	ENSG00000100890	protein_coding	gap	chr14-35180778-35266726	0	5.74863e-09	0.0470682	0.013	0.007	0.00118936	open
CM vs HM	4 - Mono	4a - CD14+ Mono	chr10-43366442-43367675	ENST00000476166	FXYD4	ENSG00000150201	protein_coding	exon	chr10-43371642-43371697	3966	5.92702e-09	0.108979	0.098	0.075	0.00122627	open
CM vs HM	4 - Mono	4a - CD14+ Mono	chr3-72018061-72018948	ENST00000468646	LINC00877	ENSG00000241163	lincRNA	exon	chr3-72035300-72036520	16351	6.21572e-09	0.0512324	0.012	0.005	0.001286	open
CM vs HM	4 - Mono	4a - CD14+ Mono	chr5-147395874-147396893	ENST00000523458	DPYSL3	ENSG00000113657	protein_coding	gap	chr5-147395722-147397665	0	6.29363e-09	0.0463917	0.008	0.002	0.00130212	open
CM vs HM	4 - Mono	4a - CD14+ Mono	chr9-69937255-69938340	ENST00000377197	C9orf135	ENSG00000204711	protein_coding	utr	chr9-69906137-69906232	31022	6.4305e-09	0.0800299	0.048	0.035	0.00133044	open
CM vs HM	4 - Mono	4a - CD14+ Mono	chr1-3166271-3167457	ENST00000607632	PRDM16	ENSG00000142611	protein_coding	gap	chr1-3069297-3186124	0	6.693e-09	0.0388088	0.005	0.001	0.00138475	open
CM vs HM	4 - Mono	4a - CD14+ Mono	chr20-44495567-44496467	ENST00000411544	SERINC3	ENSG00000132824	protein_coding	utr	chr20-44496221-44496355	0	6.76796e-09	0.0501663	0.013	0.006	0.00140026	open
CM vs HM	4 - Mono	4a - CD14+ Mono	chr7-70647802-70649026	ENST00000406775	AUTS2	ENSG00000158321	protein_coding	gap	chr7-70435782-70698568	0	6.81233e-09	0.0423596	0.013	0.007	0.00140944	open
CM vs HM	4 - Mono	4a - CD14+ Mono	chr17-67421448-67422742	ENST00000584471	PITPNC1	ENSG00000154217	protein_coding	gap	chr17-67379393-67532801	0	6.82374e-09	0.0538848	0.049	0.039	0.0014118	open
CM vs HM	4 - Mono	4a - CD14+ Mono	chr15-85317838-85319019	ENST00000560571	AKAP13	ENSG00000170776	protein_coding	exon	chr15-85380571-85380798	61551	6.89505e-09	0.0805744	0.012	0.002	0.00142655	open
CM vs HM	4 - Mono	4a - CD14+ Mono	chr3-32114386-32115431	ENST00000431009	GPD1L	ENSG00000152642	protein_coding	gap	chr3-32106818-32128075	0	6.9199e-09	0.0547815	0.022	0.014	0.00143169	open
CM vs HM	4 - Mono	4a - CD14+ Mono	chr8-6777558-6778471	ENST00000285518	AGPAT5	ENSG00000155189	protein_coding	utr	chr8-6757389-6759666	17891	6.9571e-09	-0.163981	0.004	0.031	0.00143939	closed
CM vs HM	4 - Mono	4a - CD14+ Mono	chr20-62739300-62741064	ENST00000370501	NTSR1	ENSG00000101188	protein_coding	gap	chr20-62709922-62754684	0	6.99371e-09	0.0378404	0.13	0.13	0.00144696	open
CM vs HM	4 - Mono	4a - CD14+ Mono	chr19-41324699-41325548	ENST00000269967	CCDC97	ENSG00000142039	protein_coding	utr	chr19-41322716-41324883	0	7.03143e-09	0.0639472	0.032	0.02	0.00145477	open
CM vs HM	4 - Mono	4a - CD14+ Mono	chr18-3104150-3105013	ENST00000400569	MYOM1	ENSG00000101605	protein_coding	gap	chr18-3102631-3112297	0	7.06254e-09	0.0660559	0.013	0.004	0.00146121	open
CM vs HM	4 - Mono	4a - CD14+ Mono	chr2-86785242-86786832	ENST00000409781	CD8A	ENSG00000153563	protein_coding	cds	chr2-86785920-86785971	0	7.06742e-09	0.0341307	0.016	0.011	0.00146221	open
CM vs HM	4 - Mono	4a - CD14+ Mono	chr2-28275951-28276771	ENST00000379632	BRE	ENSG00000158019	protein_coding	gap	chr2-28244863-28298337	0	7.07455e-09	0.0615167	0.012	0.004	0.00146369	open
CM vs HM	4 - Mono	4a - CD14+ Mono	chr20-19815120-19816261	ENST00000426012	RP1-122P22.2	ENSG00000233895	lincRNA	exon	chr20-19809174-19809675	5444	7.07755e-09	0.0670192	0.036	0.025	0.00146431	open
CM vs HM	4 - Mono	4a - CD14+ Mono	chr1-2300278-2300701	ENST00000508416	SKI	ENSG00000157933	protein_coding	gap	chr1-2232670-2302977	0	7.09247e-09	0.0507611	0.06	0.053	0.0014674	open
CM vs HM	4 - Mono	4a - CD14+ Mono	chr19-14584922-14585821	ENST00000551730	CLEC17A	ENSG00000187912	protein_coding	gap	chr19-14583435-14587613	0	7.12569e-09	0.0455461	0.02	0.013	0.00147427	open
CM vs HM	4 - Mono	4a - CD14+ Mono	chr16-70164677-70165915	ENST00000288050	PDPR	ENSG00000090857	protein_coding	utr	chr16-70156880-70162537	2139	7.1289e-09	0.0683404	0.024	0.014	0.00147493	open
CM vs HM	4 - Mono	4a - CD14+ Mono	chr9-6566257-6567045	ENST00000321612	GLDC	ENSG00000178445	protein_coding	gap	chr9-6565430-6587140	0	7.3708e-09	0.0665743	0.017	0.008	0.00152498	open
CM vs HM	4 - Mono	4a - CD14+ Mono	chr11-125036679-125037550	ENST00000530061	CCDC15	ENSG00000149548	protein_coding	gap	chr11-125037515-125038430	0	7.37601e-09	0.0465327	0.009	0.002	0.00152606	open
CM vs HM	4 - Mono	4a - CD14+ Mono	chr7-47941039-47942095	ENST00000436444	HUS1	ENSG00000136273	protein_coding	gap	chr7-47695776-47964185	0	7.39219e-09	0.0495323	0.059	0.05	0.00152941	open
CM vs HM	4 - Mono	4a - CD14+ Mono	chr18-58348241-58350153	ENST00000635997	NEDD4L	ENSG00000049759	protein_coding	cds	chr18-58349537-58349614	0	7.70286e-09	0.0849457	0.029	0.016	0.00159368	open
CM vs HM	4 - Mono	4a - CD14+ Mono	chr10-33005114-33006230	ENST00000475184	ITGB1	ENSG00000150093	protein_coding	utr	chr10-33005615-33005792	0	7.76673e-09	0.0574085	0.108	0.102	0.0016069	open
CM vs HM	4 - Mono	4a - CD14+ Mono	chr6-15066476-15067621	ENST00000437648	RP11-146I2.1	ENSG00000234261	lincRNA	gap	chr6-14997476-15079633	0	7.77053e-09	-0.297518	0.104	0.236	0.00160768	closed
CM vs HM	4 - Mono	4a - CD14+ Mono	chr4-1048370-1049384	ENST00000514024	RNF212	ENSG00000178222	protein_coding	exon	chr4-1056250-1056503	6865	7.77092e-09	0.0866241	0.041	0.026	0.00160776	open
CM vs HM	4 - Mono	4a - CD14+ Mono	chr17-2892214-2893036	ENST00000637138	RAP1GAP2	ENSG00000132359	protein_coding	gap	chr17-2800551-2905283	0	7.84599e-09	0.0561561	0.016	0.007	0.0016233	open
CM vs HM	4 - Mono	4a - CD14+ Mono	chr13-59336649-59337671	ENST00000400324	DIAPH3	ENSG00000139734	protein_coding	utr	chr13-59665583-59666583	327911	8.07375e-09	0.043665	0.006	0.001	0.00167042	open
CM vs HM	4 - Mono	4a - CD14+ Mono	chr3-141795976-141797185	ENST00000264952	GRK7	ENSG00000114124	protein_coding	gap	chr3-141780812-141807644	0	8.14273e-09	0.0775737	0.091	0.079	0.00168469	open
CM vs HM	4 - Mono	4a - CD14+ Mono	chr10-31242529-31243706	ENST00000605929	RP11-192P3.4	ENSG00000272381	lincRNA	gap	chr10-31188200-31259981	0	8.14904e-09	0.0691805	0.017	0.008	0.001686	open
CM vs HM	4 - Mono	4a - CD14+ Mono	chr10-86440879-86441705	ENST00000618527	WAPL	ENSG00000062650	protein_coding	gap	chr10-86438016-86443274	0	8.16603e-09	0.0534739	0.011	0.003	0.00168951	open
CM vs HM	4 - Mono	4a - CD14+ Mono	chr3-141492863-141493877	ENST00000515549	RASA2	ENSG00000155903	protein_coding	gap	chr3-141487183-141512162	0	8.21293e-09	0.045197	0.006	0.001	0.00169921	open
CM vs HM	4 - Mono	4a - CD14+ Mono	chr8-115867202-115868248	ENST00000422939	TRPS1	ENSG00000104447	protein_coding	exon	chr8-115809633-115809673	57528	8.28099e-09	0.0836105	0.029	0.013	0.00171329	open
CM vs HM	4 - Mono	4a - CD14+ Mono	chr2-231666026-231667072	ENST00000466801	PTMA	ENSG00000187514	protein_coding	exon	chr2-231706895-231707228	39822	8.30526e-09	-0.24071	0.117	0.238	0.00171832	closed
CM vs HM	4 - Mono	4a - CD14+ Mono	chr11-86632451-86633416	ENST00000543262	ME3	ENSG00000151376	protein_coding	gap	chr11-86559824-86671761	0	8.33297e-09	0.0567687	0.016	0.007	0.00172405	open
CM vs HM	4 - Mono	4a - CD14+ Mono	chr12-94761170-94762182	ENST00000261226	TMCC3	ENSG00000057704	protein_coding	exon	chr12-94650353-94650562	110607	8.34071e-09	0.0588462	0.009	0.001	0.00172565	open
CM vs HM	4 - Mono	4a - CD14+ Mono	chr7-92684813-92685863	ENST00000473078	CDK6	ENSG00000105810	protein_coding	gap	chr7-92671536-92725625	0	8.43525e-09	0.0381651	0.005	0.001	0.00174521	open
CM vs HM	4 - Mono	4a - CD14+ Mono	chr12-108305565-108306609	ENST00000552995	CMKLR1	ENSG00000174600	protein_coding	gap	chr12-108292960-108329994	0	8.5525e-09	0.0578459	0.029	0.02	0.00176947	open
CM vs HM	4 - Mono	4a - CD14+ Mono	chr1-184159910-184160948	ENST00000361641	TSEN15	ENSG00000198860	protein_coding	utr	chr1-184072848-184074212	85697	8.76671e-09	0.088611	0.044	0.03	0.00181379	open
CM vs HM	4 - Mono	4a - CD14+ Mono	chr2-11583920-11584950	ENST00000381486	GREB1	ENSG00000196208	protein_coding	gap	chr2-11580833-11585160	0	8.77236e-09	0.0484866	0.025	0.017	0.00181496	open
CM vs HM	4 - Mono	4a - CD14+ Mono	chr6-16319583-16320631	ENST00000436367	ATXN1	ENSG00000124788	protein_coding	gap	chr6-16306860-16326393	0	8.80495e-09	0.0476003	0.043	0.035	0.0018217	open
CM vs HM	4 - Mono	4a - CD14+ Mono	chr20-48768985-48770084	ENST00000371941	PREX1	ENSG00000124126	protein_coding	gap	chr20-48747881-48827641	0	8.89029e-09	0.0534442	0.086	0.074	0.00183936	open
CM vs HM	4 - Mono	4a - CD14+ Mono	chr17-69757450-69758573	ENST00000591334	LINC01483	ENSG00000227517	lincRNA	gap	chr17-69624753-69845439	0	8.92955e-09	0.0577211	0.048	0.039	0.00184748	open
CM vs HM	4 - Mono	4a - CD14+ Mono	chr17-39952542-39953518	ENST00000635792	GSDMA	ENSG00000167914	protein_coding	utr	chr17-39953263-39953305	0	9.24909e-09	-0.138801	0.34	0.524	0.00191359	closed
CM vs HM	4 - Mono	4a - CD14+ Mono	chr11-35387126-35388125	ENST00000606205	SLC1A2	ENSG00000110436	protein_coding	gap	chr11-35317517-35418949	0	9.36341e-09	0.059962	0.01	0.002	0.00193724	open
CM vs HM	4 - Mono	4a - CD14+ Mono	chr15-31483062-31484323	ENST00000307050	OTUD7A	ENSG00000169918	protein_coding	cds	chr15-31483294-31484724	0	9.50931e-09	0.0574057	0.012	0.004	0.00196743	open
CM vs HM	4 - Mono	4a - CD14+ Mono	chr3-194577773-194578704	ENST00000392432	TMEM44	ENSG00000145014	protein_coding	utr	chr3-194587673-194588528	8968	1.01174e-08	0.0721603	0.036	0.025	0.00209324	open
CM vs HM	4 - Mono	4a - CD14+ Mono	chr2-152200282-152201132	ENST00000263904	STAM2	ENSG00000115145	protein_coding	exon	chr2-152175603-152175992	24289	1.01346e-08	0.0495696	0.014	0.006	0.00209681	open
CM vs HM	4 - Mono	4a - CD14+ Mono	chr3-17830907-17831771	ENST00000414318	TBC1D5	ENSG00000131374	protein_coding	gap	chr3-17308135-18444606	0	1.01403e-08	0.0677508	0.012	0.004	0.00209797	open
CM vs HM	4 - Mono	4a - CD14+ Mono	chr1-116491752-116492756	ENST00000456414	RP5-1086K13.1	ENSG00000224950	lincRNA	exon	chr1-116493016-116494906	259	1.02705e-08	0.0410527	0.007	0.002	0.00212491	open
CM vs HM	4 - Mono	4a - CD14+ Mono	chr1-185284436-185285467	ENST00000367501	SWT1	ENSG00000116668	protein_coding	gap	chr1-185276669-185290673	0	1.03235e-08	0.0622901	0.011	0.003	0.00213588	open
CM vs HM	4 - Mono	4a - CD14+ Mono	chr17-17432926-17433914	ENST00000268711	MED9	ENSG00000141026	protein_coding	exon	chr17-17476986-17477265	43071	1.03913e-08	0.0942887	0.063	0.048	0.00214991	open
CM vs HM	4 - Mono	4a - CD14+ Mono	chr1-108590497-108592786	ENST00000405454	FAM102B	ENSG00000162636	protein_coding	gap	chr1-108560566-108600565	0	1.04e-08	0.0142077	0.14	0.151	0.00215171	open
CM vs HM	4 - Mono	4a - CD14+ Mono	chr3-59559409-59560285	ENST00000486137	RP11-719N22.2	ENSG00000242545	lincRNA	exon	chr3-59510392-59510678	48730	1.04933e-08	0.0600708	0.014	0.006	0.00217101	open
CM vs HM	4 - Mono	4a - CD14+ Mono	chr1-89635874-89636956	ENST00000482063	LRRC8C	ENSG00000171488	protein_coding	gap	chr1-89633323-89686469	0	1.06393e-08	0.039097	0.022	0.016	0.00220122	open
CM vs HM	4 - Mono	4a - CD14+ Mono	chr16-29273376-29274312	ENST00000622268	RP11-426C22.8	ENSG00000277999	lincRNA	exon	chr16-29272220-29272772	603	1.10364e-08	0.0571822	0.013	0.005	0.00228338	open
CM vs HM	4 - Mono	4a - CD14+ Mono	chr6-107731392-107732569	ENST00000369025	SCML4	ENSG00000146285	protein_coding	utr	chr6-107731974-107732395	0	1.11365e-08	0.0519361	0.006	0	0.00230409	open
CM vs HM	4 - Mono	4a - CD14+ Mono	chr22-39205322-39206338	ENST00000331163	PDGFB	ENSG00000100311	protein_coding	utr	chr22-39223359-39225313	17020	1.12e-08	0.0256339	0.008	0.005	0.00231721	open
CM vs HM	4 - Mono	4a - CD14+ Mono	chr16-89873639-89874621	ENST00000614813	TCF25	ENSG00000141002	protein_coding	cds	chr16-89873668-89873859	0	1.15345e-08	-0.184894	0.325	0.519	0.00238643	closed
CM vs HM	4 - Mono	4a - CD14+ Mono	chr11-123456650-123457920	ENST00000638157	GRAMD1B	ENSG00000023171	protein_coding	gap	chr11-123358800-123480815	0	1.15405e-08	-0.276424	0.053	0.148	0.00238766	closed
CM vs HM	4 - Mono	4a - CD14+ Mono	chr12-11814233-11815081	ENST00000545027	ETV6	ENSG00000139083	protein_coding	gap	chr12-11752580-11839139	0	1.15912e-08	0.0650274	0.018	0.008	0.00239815	open
CM vs HM	4 - Mono	4a - CD14+ Mono	chr1-212595884-212596942	ENST00000366987	ATF3	ENSG00000162772	protein_coding	gap	chr1-212565484-212615017	0	1.22656e-08	0.06795	0.065	0.051	0.00253769	open
CM vs HM	4 - Mono	4a - CD14+ Mono	chr8-101126169-101127501	ENST00000524369	KB-1460A1.1	ENSG00000253395	lincRNA	exon	chr8-101125977-101126158	10	1.24644e-08	0.0394763	0.128	0.129	0.00257881	open
CM vs HM	4 - Mono	4a - CD14+ Mono	chr5-178838947-178840005	ENST00000322434	ZNF354B	ENSG00000178338	protein_coding	exon	chr5-178859953-178860127	19947	1.26687e-08	-0.16662	0.008	0.039	0.00262109	closed
CM vs HM	4 - Mono	4a - CD14+ Mono	chr4-40254656-40255869	ENST00000381799	RHOH	ENSG00000168421	protein_coding	utr	chr4-40243963-40246967	7688	1.27365e-08	0.0491603	0.014	0.007	0.00263512	open
CM vs HM	4 - Mono	4a - CD14+ Mono	chr21-38221250-38222197	ENST00000551422	KCNJ15	ENSG00000157551	protein_coding	gap	chr21-38169269-38296925	0	1.29969e-08	0.0505493	0.027	0.018	0.00268899	open
CM vs HM	4 - Mono	4a - CD14+ Mono	chr14-91873152-91874198	ENST00000556961	FBLN5	ENSG00000140092	protein_coding	gap	chr14-91870386-91873496	0	1.31484e-08	0.0531498	0.018	0.01	0.00272034	open
CM vs HM	4 - Mono	4a - CD14+ Mono	chr15-75367642-75368592	ENST00000569482	MAN2C1	ENSG00000140400	protein_coding	cds	chr15-75368483-75368583	0	1.33661e-08	-0.257865	0.118	0.24	0.00276538	closed
CM vs HM	4 - Mono	4a - CD14+ Mono	chr19-47445530-47446684	ENST00000601757	SLC8A2	ENSG00000118160	protein_coding	gap	chr19-47441441-47447433	0	1.34263e-08	0.0624642	0.02	0.01	0.00277784	open
CM vs HM	4 - Mono	4a - CD14+ Mono	chr6-37034200-37035699	ENST00000274963	FGD2	ENSG00000146192	protein_coding	utr	chr6-37028164-37029070	5129	1.34667e-08	0.0963796	0.03	0.014	0.00278619	open
CM vs HM	4 - Mono	4a - CD14+ Mono	chrX-71615282-71616215	ENST00000373693	CXCR3	ENSG00000186810	protein_coding	utr	chrX-71615916-71616364	0	1.34906e-08	0.0427739	0.006	0.001	0.00279114	open
CM vs HM	4 - Mono	4a - CD14+ Mono	chr2-101463389-101464626	ENST00000484091	RFX8	ENSG00000196460	protein_coding	gap	chr2-101452447-101466776	0	1.36096e-08	0.0966951	0.104	0.088	0.00281576	open
CM vs HM	4 - Mono	4a - CD14+ Mono	chr16-89256524-89257652	ENST00000378330	ANKRD11	ENSG00000167522	protein_coding	utr	chr16-89267627-89268477	9974	1.36433e-08	0.0431709	0.085	0.081	0.00282274	open
CM vs HM	4 - Mono	4a - CD14+ Mono	chr1-30743371-30744402	ENST00000476492	LAPTM5	ENSG00000162511	protein_coding	gap	chr1-30742550-30757658	0	1.39014e-08	0.0331697	0.04	0.035	0.00287613	open
CM vs HM	4 - Mono	4a - CD14+ Mono	chr2-10028605-10029800	ENST00000566840	RP11-254F7.1	ENSG00000260476	lincRNA	exon	chr2-10021578-10022825	5779	1.3934e-08	-0.261345	0.088	0.21	0.00288288	closed
CM vs HM	4 - Mono	4a - CD14+ Mono	chr2-100733418-100734459	ENST00000443030	AC092168.4	ENSG00000228488	lincRNA	exon	chr2-100722820-100722882	10535	1.42249e-08	0.0919926	0.022	0.008	0.00294306	open
CM vs HM	4 - Mono	4a - CD14+ Mono	chr2-160223887-160224787	ENST00000498478	ITGB6	ENSG00000115221	protein_coding	gap	chr2-160201218-160253589	0	1.44018e-08	0.0606125	0.011	0.003	0.00297966	open
CM vs HM	4 - Mono	4a - CD14+ Mono	chr18-79156479-79157610	ENST00000590271	ATP9B	ENSG00000166377	protein_coding	gap	chr18-79154556-79193182	0	1.44518e-08	0.0881631	0.054	0.036	0.00299	open
CM vs HM	4 - Mono	4a - CD14+ Mono	chr7-99562625-99563468	ENST00000423973	ZNF655	ENSG00000197343	protein_coding	cds	chr7-99563188-99563210	0	1.4628e-08	0.0772176	0.025	0.013	0.00302645	open
CM vs HM	4 - Mono	4a - CD14+ Mono	chr21-35491637-35492833	ENST00000475045	RUNX1	ENSG00000159216	protein_coding	gap	chr21-35462026-35580659	0	1.4633e-08	-0.255965	0.02	0.082	0.0030275	closed
CM vs HM	4 - Mono	4a - CD14+ Mono	chr22-45317933-45319029	ENST00000452238	FAM118A	ENSG00000100376	protein_coding	utr	chr22-45318480-45318640	0	1.49196e-08	-0.00301545	0.095	0.107	0.00308679	closed
CM vs HM	4 - Mono	4a - CD14+ Mono	chr14-104843227-104844132	ENST00000556430	CTD-3051D23.1	ENSG00000258811	lincRNA	exon	chr14-104842663-104845916	0	1.49394e-08	0.0745968	0.011	0.002	0.00309088	open
CM vs HM	4 - Mono	4a - CD14+ Mono	chr12-108696058-108697153	ENST00000421578	CORO1C	ENSG00000110880	protein_coding	utr	chr12-108696360-108696402	0	1.50821e-08	0.0647012	0.034	0.022	0.00312041	open
CM vs HM	4 - Mono	4a - CD14+ Mono	chr14-99603772-99604917	ENST00000380243	CCDC85C	ENSG00000205476	protein_coding	cds	chr14-99603167-99603959	0	1.5123e-08	0.0309992	0.06	0.058	0.00312888	open
CM vs HM	4 - Mono	4a - CD14+ Mono	chr9-109315516-109316540	ENST00000374566	EPB41L4B	ENSG00000095203	protein_coding	gap	chr9-109279922-109320140	0	1.53112e-08	0.106312	0.017	0.003	0.00316781	open
CM vs HM	4 - Mono	4a - CD14+ Mono	chr6-16684940-16685957	ENST00000495178	ATXN1	ENSG00000124788	protein_coding	gap	chr6-16657902-16753232	0	1.55101e-08	0.0468481	0.024	0.015	0.00320895	open
CM vs HM	4 - Mono	4a - CD14+ Mono	chr1-235998722-236000033	ENST00000366595	NID1	ENSG00000116962	protein_coding	gap	chr1-235993873-236024069	0	1.56236e-08	0.0183752	0.036	0.034	0.00323245	open
CM vs HM	4 - Mono	4a - CD14+ Mono	chr12-121557316-121558559	ENST00000611216	KDM2B	ENSG00000089094	protein_coding	gap	chr12-121549639-121574546	0	1.60268e-08	0.0183149	0.011	0.009	0.00331587	open
CM vs HM	4 - Mono	4a - CD14+ Mono	chr16-34592656-34593565	ENST00000568121	CTD-2144E22.8	ENSG00000260854	lincRNA	exon	chr16-34978744-34979191	385178	1.64155e-08	0.109581	0.033	0.015	0.00339628	open
CM vs HM	4 - Mono	4a - CD14+ Mono	chr6-2688219-2689112	ENST00000274643	MYLK4	ENSG00000145949	protein_coding	cds	chr6-2688851-2688956	0	1.65744e-08	0.0541056	0.012	0.004	0.00342916	open
CM vs HM	4 - Mono	4a - CD14+ Mono	chr6-116386825-116387839	ENST00000607094	DSE	ENSG00000111817	protein_coding	gap	chr6-116279732-116399197	0	1.66635e-08	0.0482002	0.091	0.085	0.0034476	open
CM vs HM	4 - Mono	4a - CD14+ Mono	chr22-24409691-24410710	ENST00000541492	SPECC1L	ENSG00000100014	protein_coding	gap	chr22-24369321-24412647	0	1.6902e-08	0.0366531	0.008	0.003	0.00349693	open
CM vs HM	4 - Mono	4a - CD14+ Mono	chr17-67440549-67441706	ENST00000584471	PITPNC1	ENSG00000154217	protein_coding	gap	chr17-67379393-67532801	0	1.6944e-08	0.0417585	0.049	0.043	0.00350562	open
CM vs HM	4 - Mono	4a - CD14+ Mono	chr19-54873676-54874669	ENST00000488066	FCAR	ENSG00000186431	protein_coding	cds	chr19-54874290-54874323	0	1.7069e-08	0.0595822	0.112	0.105	0.00353149	open
CM vs HM	4 - Mono	4a - CD14+ Mono	chr1-59814182-59815276	ENST00000455990	HOOK1	ENSG00000134709	protein_coding	cds	chr1-59815118-59815180	0	1.7197e-08	0.0326351	0.022	0.018	0.00355797	open
CM vs HM	4 - Mono	4a - CD14+ Mono	chr12-94941158-94942168	ENST00000552205	NDUFA12	ENSG00000184752	protein_coding	gap	chr12-94928264-95002738	0	1.73401e-08	0.0553698	0.014	0.007	0.00358758	open
CM vs HM	4 - Mono	4a - CD14+ Mono	chr2-190843779-190844755	ENST00000320717	GLS	ENSG00000115419	protein_coding	exon	chr2-190880827-190881470	36071	1.78567e-08	0.0329203	0.008	0.003	0.00369447	open
CM vs HM	4 - Mono	4a - CD14+ Mono	chr1-109424864-109425667	ENST00000538610	PSMA5	ENSG00000143106	protein_coding	utr	chr1-109425326-109426132	0	1.78693e-08	0.0368143	0.026	0.021	0.00369707	open
CM vs HM	4 - Mono	4a - CD14+ Mono	chr16-81071545-81072469	ENST00000565253	C16orf46	ENSG00000166455	protein_coding	gap	chr16-81066282-81076928	0	1.78698e-08	-0.177049	0.004	0.036	0.00369717	closed
CM vs HM	4 - Mono	4a - CD14+ Mono	chr1-2586134-2587133	ENST00000537325	FAM213B	ENSG00000157870	protein_coding	cds	chr1-2587091-2587295	0	1.79864e-08	-0.197343	0.229	0.382	0.0037213	closed
CM vs HM	4 - Mono	4a - CD14+ Mono	chr16-22812874-22813829	ENST00000636354	CTC-591M7.1	ENSG00000283213	lincRNA	gap	chr16-22812402-22812986	0	1.82991e-08	0.0430257	0.008	0.002	0.00378598	open
CM vs HM	4 - Mono	4a - CD14+ Mono	chr10-49139612-49140341	ENST00000311787	FAM170B	ENSG00000172538	protein_coding	exon	chr10-49133807-49134008	5603	1.89642e-08	0.0391877	0.008	0.002	0.0039236	open
CM vs HM	4 - Mono	4a - CD14+ Mono	chr19-29671248-29672231	ENST00000592810	PLEKHF1	ENSG00000166289	protein_coding	gap	chr19-29665796-29673823	0	1.91791e-08	0.0336469	0.017	0.012	0.00396806	open
CM vs HM	4 - Mono	4a - CD14+ Mono	chr2-145652913-145653770	ENST00000418416	AC079163.1	ENSG00000226218	lincRNA	exon	chr2-145603238-145603423	49489	1.92541e-08	0.0574171	0.017	0.008	0.00398358	open
CM vs HM	4 - Mono	4a - CD14+ Mono	chr6-2534153-2535424	ENST00000606884	GMDS-AS1	ENSG00000250903	lincRNA	exon	chr6-2481987-2482022	52130	1.92939e-08	0.0843248	0.057	0.04	0.00399181	open
CM vs HM	4 - Mono	4a - CD14+ Mono	chr17-78242010-78243307	ENST00000586400	TMEM235	ENSG00000204278	protein_coding	utr	chr17-78239793-78240987	1022	1.93396e-08	0.0804211	0.034	0.021	0.00400127	open
CM vs HM	4 - Mono	4a - CD14+ Mono	chr5-180085585-180086495	ENST00000521389	RNF130	ENSG00000113269	protein_coding	exon	chr5-180071456-180072118	13466	1.95012e-08	0.0358711	0.005	0.001	0.00403471	open
CM vs HM	4 - Mono	4a - CD14+ Mono	chr15-68232506-68233616	ENST00000638144	CLN6	ENSG00000128973	protein_coding	gap	chr15-68214389-68248353	0	1.95111e-08	0.091856	0.05	0.033	0.00403675	open
CM vs HM	4 - Mono	4a - CD14+ Mono	chr17-2265932-2267012	ENST00000570606	SMG6	ENSG00000070366	protein_coding	utr	chr17-2265930-2266131	0	1.95773e-08	0.0268752	0.019	0.015	0.00405044	open
CM vs HM	4 - Mono	4a - CD14+ Mono	chr11-64810099-64811210	ENST00000450708	MEN1	ENSG00000133895	protein_coding	cds	chr11-64809665-64810109	0	1.96415e-08	-0.273067	0.069	0.166	0.00406373	closed
CM vs HM	4 - Mono	4a - CD14+ Mono	chr8-124637028-124638230	ENST00000529463	MTSS1	ENSG00000170873	protein_coding	gap	chr8-124591236-124673196	0	1.98376e-08	0.0515036	0.017	0.01	0.0041043	open
CM vs HM	4 - Mono	4a - CD14+ Mono	chr15-90165373-90166494	ENST00000559322	SEMA4B	ENSG00000185033	protein_coding	gap	chr15-90160701-90201457	0	2.00036e-08	0.0755802	0.035	0.022	0.00413864	open
CM vs HM	4 - Mono	4a - CD14+ Mono	chr8-29656109-29657097	ENST00000518623	LINC00589	ENSG00000251191	lincRNA	exon	chr8-29673922-29674443	16824	2.01852e-08	0.0616815	0.045	0.035	0.00417622	open
CM vs HM	4 - Mono	4a - CD14+ Mono	chr6-37173410-37174216	ENST00000373509	PIM1	ENSG00000137193	protein_coding	cds	chr6-37173934-37174091	0	2.04645e-08	0.0781137	0.029	0.016	0.00423401	open
CM vs HM	4 - Mono	4a - CD14+ Mono	chr17-39928874-39929893	ENST00000582263	RP11-387H17.4	ENSG00000264968	lincRNA	gap	chr17-39929234-39934610	0	2.09469e-08	0.0294457	0.052	0.049	0.00433381	open
CM vs HM	4 - Mono	4a - CD14+ Mono	chr12-949348-950509	ENST00000544742	RAD52	ENSG00000002016	protein_coding	utr	chr12-949606-949649	0	2.11541e-08	-0.233471	0.264	0.453	0.00437668	closed
CM vs HM	4 - Mono	4a - CD14+ Mono	chr18-79326127-79327929	ENST00000590163	ATP9B	ENSG00000166377	protein_coding	gap	chr18-79307235-79329140	0	2.12294e-08	0.0367033	0.005	0.001	0.00439227	open
CM vs HM	4 - Mono	4a - CD14+ Mono	chr1-52631422-52632517	ENST00000440303	FAM159A	ENSG00000182183	protein_coding	exon	chr1-52633344-52633675	826	2.12673e-08	0.0651491	0.022	0.011	0.0044001	open
CM vs HM	4 - Mono	4a - CD14+ Mono	chr7-12731226-12732238	ENST00000396663	ARL4A	ENSG00000122644	protein_coding	utr	chr7-12688858-12690934	40291	2.14125e-08	0.0307659	0.004	0	0.00443014	open
CM vs HM	4 - Mono	4a - CD14+ Mono	chr10-128048099-128049105	ENST00000495530	PTPRE	ENSG00000132334	protein_coding	gap	chr10-128047838-128049529	0	2.14939e-08	0.0405982	0.096	0.095	0.00444699	open
CM vs HM	4 - Mono	4a - CD14+ Mono	chr10-86872615-86873624	ENST00000636056	BMPR1A	ENSG00000107779	protein_coding	gap	chr10-86838980-86875866	0	2.1498e-08	-0.217357	0.016	0.064	0.00444783	closed
CM vs HM	4 - Mono	4a - CD14+ Mono	chr11-86099663-86100479	ENST00000528398	PICALM	ENSG00000073921	protein_coding	exon	chr11-86069720-86069882	29780	2.15933e-08	0.0402392	0.007	0.002	0.00446755	open
CM vs HM	4 - Mono	4a - CD14+ Mono	chr13-28819508-28821111	ENST00000612955	MTUS2	ENSG00000132938	protein_coding	utr	chr13-28820348-28820611	0	2.15969e-08	0.0508861	0.014	0.006	0.00446828	open
CM vs HM	4 - Mono	4a - CD14+ Mono	chr3-188400129-188401182	ENST00000618621	LPP	ENSG00000145012	protein_coding	gap	chr3-188225528-188406111	0	2.16026e-08	-0.238516	0.024	0.088	0.00446947	closed
CM vs HM	4 - Mono	4a - CD14+ Mono	chr9-131668325-131669399	ENST00000438647	RAPGEF1	ENSG00000107263	protein_coding	gap	chr9-131650950-131739769	0	2.19046e-08	0.029262	0.031	0.026	0.00453194	open
CM vs HM	4 - Mono	4a - CD14+ Mono	chr15-70281578-70282653	ENST00000558226	RP11-543G18.1	ENSG00000259503	lincRNA	exon	chr15-70321576-70321697	38922	2.20412e-08	0.0463774	0.012	0.005	0.00456021	open
CM vs HM	4 - Mono	4a - CD14+ Mono	chr3-161349486-161350638	ENST00000497137	SPTSSB	ENSG00000196542	protein_coding	gap	chr3-161348104-161359801	0	2.21615e-08	0.051443	0.009	0.002	0.0045851	open
CM vs HM	4 - Mono	4a - CD14+ Mono	chr6-151036026-151036848	ENST00000618312	MTHFD1L	ENSG00000120254	protein_coding	gap	chr6-151034601-151036964	0	2.23165e-08	0.0697812	0.019	0.008	0.00461717	open
CM vs HM	4 - Mono	4a - CD14+ Mono	chr11-1153651-1154425	ENST00000621226	MUC5AC	ENSG00000215182	protein_coding	exon	chr11-1157953-1158072	3527	2.30697e-08	0.0497493	0.009	0.002	0.00477301	open
CM vs HM	4 - Mono	4a - CD14+ Mono	chr5-149680428-149681475	ENST00000333677	ARHGEF37	ENSG00000183111	protein_coding	utr	chr5-149632192-149634968	45459	2.31484e-08	-0.223373	0.161	0.304	0.00478929	closed
CM vs HM	4 - Mono	4a - CD14+ Mono	chr3-45122767-45123711	ENST00000490471	CDCP1	ENSG00000163814	protein_coding	gap	chr3-45118622-45139351	0	2.32262e-08	0.0557336	0.029	0.019	0.00480538	open
CM vs HM	4 - Mono	4a - CD14+ Mono	chr2-28583705-28584901	ENST00000436544	PLB1	ENSG00000163803	protein_coding	gap	chr2-28582506-28585760	0	2.32661e-08	0.0647675	0.062	0.05	0.00481365	open
CM vs HM	4 - Mono	4a - CD14+ Mono	chr9-89501617-89502846	ENST00000455551	SEMA4D	ENSG00000187764	protein_coding	exon	chr9-89497919-89498130	3486	2.34267e-08	0.0415175	0.013	0.008	0.00484687	open
CM vs HM	4 - Mono	4a - CD14+ Mono	chr19-1213504-1214612	ENST00000593219	STK11	ENSG00000118046	protein_coding	gap	chr19-1207204-1216267	0	2.35915e-08	-0.247097	0.124	0.255	0.00488096	closed
CM vs HM	4 - Mono	4a - CD14+ Mono	chr8-24349164-24350390	ENST00000521629	ADAM28	ENSG00000042980	protein_coding	cds	chr8-24349864-24349972	0	2.36176e-08	-0.235617	0.023	0.085	0.00488637	closed
CM vs HM	4 - Mono	4a - CD14+ Mono	chr2-215902810-215903578	ENST00000443971	AC122136.2	ENSG00000227824	lincRNA	exon	chr2-215870264-215870518	32291	2.37007e-08	0.0588939	0.023	0.013	0.00490356	open
CM vs HM	4 - Mono	4a - CD14+ Mono	chr12-111393438-111394603	ENST00000552663	RP3-473L9.4	ENSG00000257595	lincRNA	gap	chr12-111372071-111403137	0	2.3809e-08	-0.244825	0.105	0.232	0.00492597	closed
CM vs HM	4 - Mono	4a - CD14+ Mono	chr14-78005000-78006006	ENST00000555217	ADCK1	ENSG00000063761	protein_coding	exon	chr14-77933220-77935012	69987	2.38767e-08	0.0811511	0.026	0.014	0.00493997	open
CM vs HM	4 - Mono	4a - CD14+ Mono	chr6-32668035-32669060	ENST00000399084	HLA-DQB1	ENSG00000179344	protein_coding	utr	chr6-32668268-32668383	0	2.52273e-08	-0.291282	0.036	0.126	0.0052194	closed
CM vs HM	4 - Mono	4a - CD14+ Mono	chr6-14209331-14210138	ENST00000455973	RP11-359N11.1	ENSG00000230631	lincRNA	exon	chr6-14229775-14230201	19636	2.55901e-08	0.0479211	0.026	0.018	0.00529446	open
CM vs HM	4 - Mono	4a - CD14+ Mono	chr7-150754945-150756259	ENST00000466347	GIMAP5	ENSG00000196329	protein_coding	exon	chr7-150749732-150750033	4911	2.59709e-08	0.0518128	0.019	0.012	0.00537326	open
CM vs HM	4 - Mono	4a - CD14+ Mono	chr16-9068060-9069216	ENST00000562893	RP11-473I1.6	ENSG00000261392	lincRNA	gap	chr16-9068654-9070852	0	2.64202e-08	0.0732228	0.025	0.013	0.00546621	open
CM vs HM	4 - Mono	4a - CD14+ Mono	chr20-51493926-51495103	ENST00000610033	NFATC2	ENSG00000101096	protein_coding	gap	chr20-51475661-51516783	0	2.67444e-08	0.0427693	0.009	0.004	0.00553328	open
CM vs HM	4 - Mono	4a - CD14+ Mono	chr8-124649919-124650845	ENST00000529463	MTSS1	ENSG00000170873	protein_coding	gap	chr8-124591236-124673196	0	2.73108e-08	0.046169	0.008	0.002	0.00565048	open
CM vs HM	4 - Mono	4a - CD14+ Mono	chr10-93436893-93437990	ENST00000488645	MYOF	ENSG00000138119	protein_coding	gap	chr10-93431517-93452049	0	2.73985e-08	0.0820642	0.106	0.094	0.0056686	open
CM vs HM	4 - Mono	4a - CD14+ Mono	chr17-75087177-75088391	ENST00000580123	SLC16A5	ENSG00000170190	protein_coding	utr	chr17-75087727-75087896	0	2.76134e-08	-0.263606	0.084	0.193	0.00571307	closed
CM vs HM	4 - Mono	4a - CD14+ Mono	chrX-71994344-71995258	ENST00000633930	NHSL2	ENSG00000204131	protein_coding	gap	chrX-71911368-72132078	0	2.8045e-08	0.0330582	0.004	0	0.00580236	open
CM vs HM	4 - Mono	4a - CD14+ Mono	chr17-48505547-48506501	ENST00000239174	HOXB1	ENSG00000120094	protein_coding	utr	chr17-48528526-48529546	22024	2.80861e-08	0.0731826	0.028	0.016	0.00581087	open
CM vs HM	4 - Mono	4a - CD14+ Mono	chr1-30754392-30755467	ENST00000476492	LAPTM5	ENSG00000162511	protein_coding	gap	chr1-30742550-30757658	0	2.81182e-08	0.0649032	0.093	0.081	0.00581752	open
CM vs HM	4 - Mono	4a - CD14+ Mono	chr16-86951781-86952739	ENST00000430050	RP11-134D3.1	ENSG00000232190	lincRNA	exon	chr16-87057784-87060499	105044	2.82509e-08	0.0487045	0.009	0.002	0.00584498	open
CM vs HM	4 - Mono	4a - CD14+ Mono	chr11-131938041-131939034	ENST00000550167	NTM	ENSG00000182667	protein_coding	gap	chr11-131911649-132146281	0	2.83192e-08	-0.162673	0.005	0.039	0.00585911	closed
CM vs HM	4 - Mono	4a - CD14+ Mono	chr2-29011262-29012238	ENST00000379558	FAM179A	ENSG00000189350	protein_coding	cds	chr2-29011455-29011501	0	2.86873e-08	0.0388034	0.018	0.012	0.00593526	open
CM vs HM	4 - Mono	4a - CD14+ Mono	chr9-107976403-107977429	ENST00000410527	RNA5SP293	ENSG00000222459	rRNA	exon	chr9-107918866-107918978	57424	2.89951e-08	-0.203172	0.035	0.099	0.00599894	closed
CM vs HM	4 - Mono	4a - CD14+ Mono	chr12-22409289-22410388	ENST00000536558	ST8SIA1	ENSG00000111728	protein_coding	gap	chr12-22354784-22436875	0	2.90571e-08	0.0328878	0.012	0.008	0.00601178	open
CM vs HM	4 - Mono	4a - CD14+ Mono	chr20-58228181-58229181	ENST00000457363	ANKRD60	ENSG00000124227	protein_coding	cds	chr20-58228224-58228653	0	2.92057e-08	0.0490064	0.019	0.012	0.00604252	open
CM vs HM	4 - Mono	4a - CD14+ Mono	chr6-125904567-125905530	ENST00000433571	NCOA7	ENSG00000111912	protein_coding	gap	chr6-125900022-125915332	0	2.94863e-08	0.045054	0.007	0.001	0.00610058	open
CM vs HM	4 - Mono	4a - CD14+ Mono	chr4-1330445-1331491	ENST00000514708	MAEA	ENSG00000090316	protein_coding	gap	chr4-1315601-1332756	0	2.95456e-08	0.0520006	0.011	0.004	0.00611284	open
CM vs HM	4 - Mono	4a - CD14+ Mono	chr12-96445381-96446469	ENST00000548740	RP11-510I5.4	ENSG00000258272	lincRNA	gap	chr12-96429468-96483449	0	2.95749e-08	0.0268177	0.026	0.021	0.00611889	open
CM vs HM	4 - Mono	4a - CD14+ Mono	chr3-59426839-59428055	ENST00000486137	RP11-719N22.2	ENSG00000242545	lincRNA	exon	chr3-59464330-59464740	36274	2.99574e-08	0.0724298	0.07	0.056	0.00619803	open
CM vs HM	4 - Mono	4a - CD14+ Mono	chr1-234699814-234700781	ENST00000442382	RP4-781K5.6	ENSG00000230628	lincRNA	exon	chr1-234696058-234696153	3660	3.03348e-08	0.052639	0.011	0.004	0.00627612	open
CM vs HM	4 - Mono	4a - CD14+ Mono	chr12-29254682-29255795	ENST00000551451	FAR2	ENSG00000064763	protein_coding	gap	chr12-29149408-29293299	0	3.06077e-08	-0.21797	0.031	0.096	0.00633257	closed
CM vs HM	4 - Mono	4a - CD14+ Mono	chr1-161389543-161390653	ENST00000636161	RP11-122G18.12	ENSG00000283696	lincRNA	exon	chr1-161399409-161399912	8755	3.11562e-08	-0.203019	0.293	0.483	0.00644607	closed
CM vs HM	4 - Mono	4a - CD14+ Mono	chr2-239926890-239928117	ENST00000419408	NDUFA10	ENSG00000130414	protein_coding	gap	chr2-239895315-239990073	0	3.12123e-08	0.047631	0.108	0.102	0.00645767	open
CM vs HM	4 - Mono	4a - CD14+ Mono	chr2-57443723-57444963	ENST00000417641	VRK2	ENSG00000028116	protein_coding	exon	chr2-57907651-57907839	462687	3.13098e-08	0.0702911	0.052	0.039	0.00647785	open
CM vs HM	4 - Mono	4a - CD14+ Mono	chr4-87843615-87844739	ENST00000560249	MEPE	ENSG00000152595	protein_coding	gap	chr4-87840033-87844976	0	3.16037e-08	0.0940011	0.094	0.076	0.00653864	open
CM vs HM	4 - Mono	4a - CD14+ Mono	chr14-97788393-97789603	ENST00000555889	RP11-204N11.2	ENSG00000258379	lincRNA	gap	chr14-97786849-97789001	0	3.18229e-08	0.0389854	0.005	0	0.006584	open
CM vs HM	4 - Mono	4a - CD14+ Mono	chr9-95724269-95725271	ENST00000422343	RP11-180I4.2	ENSG00000228142	lincRNA	exon	chr9-95715404-95715718	8550	3.20577e-08	0.0490517	0.013	0.007	0.00663258	open
CM vs HM	4 - Mono	4a - CD14+ Mono	chr17-44137698-44138868	ENST00000319977	C17orf53	ENSG00000125319	protein_coding	exon	chr17-44141906-44142145	3037	3.2561e-08	0.0807184	0.051	0.035	0.0067367	open
CM vs HM	4 - Mono	4a - CD14+ Mono	chr16-20883949-20884834	ENST00000564349	ERI2	ENSG00000196678	protein_coding	gap	chr16-20803671-20896307	0	3.2577e-08	0.0347992	0.005	0.001	0.00674003	open
CM vs HM	4 - Mono	4a - CD14+ Mono	chr5-158390243-158391254	ENST00000619068	RP11-524N5.1	ENSG00000276778	lincRNA	gap	chr5-158369611-158409645	0	3.2687e-08	0.0679327	0.04	0.027	0.00676278	open
CM vs HM	4 - Mono	4a - CD14+ Mono	chr11-133944839-133945863	ENST00000533871	IGSF9B	ENSG00000080854	protein_coding	gap	chr11-133944367-133946060	0	3.27656e-08	0.0280789	0.012	0.008	0.00677903	open
CM vs HM	4 - Mono	4a - CD14+ Mono	chr10-108203441-108204295	ENST00000629275	LINC01435	ENSG00000229981	lincRNA	exon	chr10-108197736-108197849	5591	3.31034e-08	0.0344951	0.004	0	0.00684894	open
CM vs HM	4 - Mono	4a - CD14+ Mono	chr9-127918954-127920225	ENST00000388747	PIP5KL1	ENSG00000167103	protein_coding	utr	chr9-127920879-127921846	653	3.32295e-08	0.0446527	0.114	0.111	0.00687501	open
CM vs HM	4 - Mono	4a - CD14+ Mono	chr14-99191090-99192779	ENST00000443726	BCL11B	ENSG00000127152	protein_coding	gap	chr14-99176196-99271160	0	3.3417e-08	0.0381593	0.014	0.008	0.00691382	open
CM vs HM	4 - Mono	4a - CD14+ Mono	chr5-150159630-150160555	ENST00000523456	PDGFRB	ENSG00000113721	protein_coding	exon	chr5-150155397-150155872	3757	3.35411e-08	0.0385179	0.014	0.008	0.00693948	open
CM vs HM	4 - Mono	4a - CD14+ Mono	chr17-75300789-75302411	ENST00000580273	SLC25A19	ENSG00000125454	protein_coding	exon	chr17-75289354-75289510	11278	3.48014e-08	0.0324549	0.101	0.1	0.00720023	open
CM vs HM	4 - Mono	4a - CD14+ Mono	chr16-24669255-24670127	ENST00000566108	TNRC6A	ENSG00000090905	protein_coding	gap	chr16-24641010-24750725	0	3.53303e-08	0.0407893	0.007	0.001	0.00730965	open
CM vs HM	4 - Mono	4a - CD14+ Mono	chr7-92641636-92642771	ENST00000424848	CDK6	ENSG00000105810	protein_coding	gap	chr7-92623087-92671425	0	3.53808e-08	0.0609883	0.027	0.018	0.00732011	open
CM vs HM	4 - Mono	4a - CD14+ Mono	chr17-80720676-80721733	ENST00000577161	RPTOR	ENSG00000141564	protein_coding	gap	chr17-80708000-80730559	0	3.72139e-08	0.0367197	0.007	0.002	0.00769938	open
CM vs HM	4 - Mono	4a - CD14+ Mono	chr22-45101473-45102533	ENST00000426282	NUP50-AS1	ENSG00000226328	lincRNA	exon	chr22-45133020-45134797	30486	3.73789e-08	-0.218026	0.01	0.057	0.00773351	closed
CM vs HM	4 - Mono	4a - CD14+ Mono	chr5-149938714-149939761	ENST00000617647	PDE6A	ENSG00000132915	protein_coding	gap	chr5-149931169-149944199	0	3.78614e-08	0.0566661	0.104	0.1	0.00783334	open
CM vs HM	4 - Mono	4a - CD14+ Mono	chr18-80105063-80106066	ENST00000262198	ADNP2	ENSG00000101544	protein_coding	exon	chr18-80109031-80109472	2964	3.8179e-08	0.0461902	0.007	0.001	0.00789904	open
CM vs HM	4 - Mono	4a - CD14+ Mono	chr15-53807705-53808924	ENST00000396328	WDR72	ENSG00000166415	protein_coding	exon	chr15-53762651-53762878	44826	3.82337e-08	0.0462655	0.005	0	0.00791035	open
CM vs HM	4 - Mono	4a - CD14+ Mono	chr19-9818868-9819839	ENST00000592067	FBXL12	ENSG00000127452	protein_coding	utr	chr19-9818814-9819079	0	3.82567e-08	-0.110793	0.462	0.65	0.00791512	closed
CM vs HM	4 - Mono	4a - CD14+ Mono	chr1-156511439-156512446	ENST00000564032	RP11-284F21.8	ENSG00000260460	lincRNA	exon	chr1-156509854-156511681	0	3.83542e-08	0.065231	0.061	0.05	0.00793529	open
CM vs HM	4 - Mono	4a - CD14+ Mono	chr15-98169218-98170329	ENST00000560360	CTD-2544M6.1	ENSG00000259199	lincRNA	gap	chr15-98046740-98257578	0	3.84719e-08	0.0461702	0.008	0.002	0.00795964	open
CM vs HM	4 - Mono	4a - CD14+ Mono	chr8-100494272-100495690	ENST00000520552	ANKRD46	ENSG00000186106	protein_coding	utr	chr8-100509752-100510576	14061	3.87437e-08	0.0369528	0.018	0.012	0.00801589	open
CM vs HM	4 - Mono	4a - CD14+ Mono	chr14-20480498-20481264	ENST00000361505	PNP	ENSG00000198805	protein_coding	utr	chr14-20476602-20477094	3403	3.90811e-08	0.0573185	0.012	0.004	0.00808569	open
CM vs HM	4 - Mono	4a - CD14+ Mono	chr1-160075566-160076603	ENST00000368088	KCNJ9	ENSG00000162728	protein_coding	exon	chr1-160081570-160081697	4966	3.91002e-08	-0.207198	0.009	0.05	0.00808963	closed
CM vs HM	4 - Mono	4a - CD14+ Mono	chr17-44971811-44972789	ENST00000253407	C1QL1	ENSG00000131094	protein_coding	exon	chr17-44967452-44968071	3739	3.9571e-08	0.0474541	0.008	0.002	0.00818704	open
CM vs HM	4 - Mono	4a - CD14+ Mono	chr12-124655413-124656532	ENST00000542565	NCOR2	ENSG00000196498	protein_coding	exon	chr12-124567308-124567589	87823	4.00045e-08	-0.241604	0.024	0.084	0.00827673	closed
CM vs HM	4 - Mono	4a - CD14+ Mono	chr11-102474026-102475207	ENST00000525577	TMEM123	ENSG00000152558	protein_coding	exon	chr11-102470174-102470384	3641	4.01994e-08	0.0453555	0.006	0.001	0.00831704	open
CM vs HM	4 - Mono	4a - CD14+ Mono	chr6-109307840-109308839	ENST00000413644	CD164	ENSG00000135535	protein_coding	utr	chr6-109366514-109368278	57674	4.05982e-08	0.0891096	0.023	0.01	0.00839956	open
CM vs HM	4 - Mono	4a - CD14+ Mono	chr8-104336697-104337658	ENST00000521601	DPYS	ENSG00000147647	protein_coding	gap	chr8-104331965-104381183	0	4.08082e-08	0.0652662	0.017	0.008	0.00844302	open
CM vs HM	4 - Mono	4a - CD14+ Mono	chr4-102627623-102628571	ENST00000514430	MANBA	ENSG00000109323	protein_coding	exon	chr4-102631488-102632281	2916	4.08721e-08	0.0369616	0.007	0.002	0.00845623	open
CM vs HM	4 - Mono	4a - CD14+ Mono	chr15-75274175-75275202	ENST00000618219	GOLGA6D	ENSG00000140478	protein_coding	gap	chr15-75265209-75289591	0	4.13836e-08	0.0531615	0.018	0.01	0.00856207	open
CM vs HM	4 - Mono	4a - CD14+ Mono	chr9-124266998-124268180	ENST00000545174	NEK6	ENSG00000119408	protein_coding	gap	chr9-124258362-124301935	0	4.14518e-08	0.0542769	0.048	0.039	0.00857616	open
CM vs HM	4 - Mono	4a - CD14+ Mono	chr5-139458508-139459554	ENST00000618155	ECSCR	ENSG00000249751	protein_coding	gap	chr5-139458184-139462609	0	4.15528e-08	0.0325914	0.023	0.018	0.00859707	open
CM vs HM	4 - Mono	4a - CD14+ Mono	chr10-32992345-32993405	ENST00000534049	ITGB1	ENSG00000150093	protein_coding	utr	chr10-32992331-32992463	0	4.25593e-08	0.0401339	0.006	0.001	0.0088053	open
CM vs HM	4 - Mono	4a - CD14+ Mono	chr22-30212351-30213470	ENST00000249075	LIF	ENSG00000128342	protein_coding	utr	chr22-30240447-30243650	26976	4.27288e-08	0.0590505	0.113	0.108	0.00884037	open
CM vs HM	4 - Mono	4a - CD14+ Mono	chr2-196130045-196130773	ENST00000263955	STK17B	ENSG00000081320	protein_coding	utr	chr2-196133566-196137446	2792	4.27433e-08	0.0486413	0.012	0.005	0.00884337	open
CM vs HM	4 - Mono	4a - CD14+ Mono	chr17-82884429-82885464	ENST00000576760	TBCD	ENSG00000141556	protein_coding	utr	chr17-82884801-82884936	0	4.35427e-08	0.0562861	0.012	0.004	0.00900878	open
CM vs HM	4 - Mono	4a - CD14+ Mono	chr19-8681233-8682214	ENST00000324436	ACTL9	ENSG00000181786	protein_coding	utr	chr19-8697397-8697450	15182	4.38203e-08	0.0510821	0.032	0.023	0.00906621	open
CM vs HM	4 - Mono	4a - CD14+ Mono	chr1-91555766-91556834	ENST00000428239	CDC7	ENSG00000097046	protein_coding	utr	chr1-91524436-91525764	30001	4.3893e-08	0.0371174	0.019	0.014	0.00908124	open
CM vs HM	4 - Mono	4a - CD14+ Mono	chr6-44010135-44011310	ENST00000336600	C6orf223	ENSG00000181577	protein_coding	utr	chr6-44003127-44005958	4176	4.4191e-08	0.0638607	0.028	0.019	0.00914289	open
CM vs HM	4 - Mono	4a - CD14+ Mono	chr2-46873262-46874369	ENST00000490950	LINC01119	ENSG00000239332	lincRNA	exon	chr2-46858086-46859007	14254	4.45918e-08	0.0746648	0.03	0.017	0.00922582	open
CM vs HM	4 - Mono	4a - CD14+ Mono	chr8-96845214-96846202	ENST00000220763	CPQ	ENSG00000104324	protein_coding	gap	chr8-96835181-96879797	0	4.53729e-08	0.0694994	0.016	0.006	0.00938743	open
CM vs HM	4 - Mono	4a - CD14+ Mono	chr19-43780556-43781697	ENST00000599720	KCNN4	ENSG00000104783	protein_coding	cds	chr19-43780703-43780861	0	4.56151e-08	0.0444241	0.048	0.041	0.00943753	open
CM vs HM	4 - Mono	4a - CD14+ Mono	chr6-37696740-37697507	ENST00000505425	MDGA1	ENSG00000112139	protein_coding	cds	chr6-37696745-37696811	0	4.65553e-08	0.0512042	0.032	0.025	0.00963206	open
CM vs HM	4 - Mono	4a - CD14+ Mono	chr6-8083009-8083938	ENST00000502429	EEF1E1	ENSG00000124802	protein_coding	gap	chr6-8078741-8090185	0	4.66477e-08	0.0469471	0.025	0.018	0.00965118	open
CM vs HM	4 - Mono	4a - CD14+ Mono	chr17-36212815-36213730	ENST00000620732	CCL4L2	ENSG00000276070	protein_coding	utr	chr17-36212297-36212878	0	4.74657e-08	-0.230458	0.024	0.082	0.00982041	closed
CM vs HM	4 - Mono	4a - CD14+ Mono	chr1-144412040-144413116	ENST00000455105	RP11-763B22.4	ENSG00000237343	lincRNA	exon	chr1-144418113-144418370	4996	4.76486e-08	0.051647	0.117	0.115	0.00985827	open
CM vs HM	4 - Mono	4a - CD14+ Mono	chr10-97069572-97070739	ENST00000497714	SLIT1	ENSG00000187122	protein_coding	gap	chr10-97066087-97101350	0	4.81984e-08	0.065774	0.016	0.006	0.009972	open
CM vs HM	4 - Mono	4a - CD14+ Mono	chr6-16285740-16286636	ENST00000259727	GMPR	ENSG00000137198	protein_coding	cds	chr6-16285793-16285835	0	4.86267e-08	0.0462814	0.006	0	0.0100606	open
CM vs HM	4 - Mono	4a - CD14+ Mono	chr4-81374625-81375446	ENST00000509081	RASGEF1B	ENSG00000138670	protein_coding	utr	chr4-81426393-81427767	50946	4.87142e-08	0.0330192	0.004	0	0.0100787	open
CM vs HM	4 - Mono	4a - CD14+ Mono	chr8-124814612-124815609	ENST00000533516	RP11-1082L8.3	ENSG00000255491	lincRNA	gap	chr8-124812188-124815242	0	4.87867e-08	0.068871	0.058	0.046	0.0100937	open
CM vs HM	4 - Mono	4a - CD14+ Mono	chr8-96962932-96963829	ENST00000220763	CPQ	ENSG00000104324	protein_coding	gap	chr8-96880006-96965934	0	4.98238e-08	0.0597247	0.024	0.015	0.0103083	open
CM vs HM	4 - Mono	4a - CD14+ Mono	chr19-4561800-4562819	ENST00000586582	SEMA6B	ENSG00000167680	protein_coding	exon	chr19-4559530-4559808	1991	5.01909e-08	0.0787269	0.128	0.112	0.0103842	open
CM vs HM	4 - Mono	4a - CD14+ Mono	chr16-81172678-81173642	ENST00000624382	AC092718.1	ENSG00000279362	protein_coding	gap	chr16-81171075-81174719	0	5.02238e-08	0.0331268	0.004	0	0.010391	open
CM vs HM	4 - Mono	4a - CD14+ Mono	chr19-14542296-14543348	ENST00000601652	TECR	ENSG00000099797	protein_coding	gap	chr19-14529712-14562524	0	5.10586e-08	0.0621604	0.016	0.007	0.0105638	open
CM vs HM	4 - Mono	4a - CD14+ Mono	chr1-93607648-93608476	ENST00000479503	BCAR3	ENSG00000137936	protein_coding	gap	chr1-93592394-93642303	0	5.14728e-08	0.0478874	0.011	0.004	0.0106495	open
CM vs HM	4 - Mono	4a - CD14+ Mono	chr10-1159148-1160173	ENST00000583117	LINC00200	ENSG00000229205	lincRNA	gap	chr10-1159991-1160552	0	5.17278e-08	0.0987188	0.016	0.002	0.0107022	open
CM vs HM	4 - Mono	4a - CD14+ Mono	chr17-67390326-67391441	ENST00000584471	PITPNC1	ENSG00000154217	protein_coding	gap	chr17-67379393-67532801	0	5.29238e-08	0.0646299	0.013	0.005	0.0109497	open
CM vs HM	4 - Mono	4a - CD14+ Mono	chr1-35191480-35192552	ENST00000357214	SFPQ	ENSG00000116560	protein_coding	cds	chr1-35192222-35193049	0	5.31342e-08	0.00600706	0.108	0.12	0.0109932	open
CM vs HM	4 - Mono	4a - CD14+ Mono	chr6-149031884-149033006	ENST00000367463	UST	ENSG00000111962	protein_coding	gap	chr6-149021482-149073832	0	5.3629e-08	0.0796628	0.018	0.007	0.0110956	open
CM vs HM	4 - Mono	4a - CD14+ Mono	chr1-52601952-52602965	ENST00000361314	GPX7	ENSG00000116157	protein_coding	cds	chr1-52602410-52602547	0	5.3823e-08	0.0507195	0.036	0.026	0.0111357	open
CM vs HM	4 - Mono	4a - CD14+ Mono	chr1-246788556-246789562	ENST00000505748	LINC01341	ENSG00000227953	processed_transcript	gap	chr1-246780584-246789507	0	5.39702e-08	0.0440497	0.008	0.002	0.0111662	open
CM vs HM	4 - Mono	4a - CD14+ Mono	chr14-20796298-20797642	ENST00000397967	RNASE1	ENSG00000129538	protein_coding	utr	chr14-20801228-20801597	3585	5.41748e-08	0.0782286	0.033	0.021	0.0112085	open
CM vs HM	4 - Mono	4a - CD14+ Mono	chr5-61313676-61314697	ENST00000252744	ZSWIM6	ENSG00000130449	protein_coding	exon	chr5-61332273-61332948	17575	5.4206e-08	0.0654906	0.043	0.034	0.0112149	open
CM vs HM	4 - Mono	4a - CD14+ Mono	chr12-12384505-12385801	ENST00000543990	BORCS5	ENSG00000165714	protein_coding	gap	chr12-12361350-12435627	0	5.43034e-08	0.0339972	0.01	0.005	0.0112351	open
CM vs HM	4 - Mono	4a - CD14+ Mono	chr16-46387388-46388244	ENST00000303383	SHCBP1	ENSG00000171241	protein_coding	utr	chr16-46580554-46581728	192309	5.44809e-08	0.103607	0.027	0.011	0.0112718	open
CM vs HM	4 - Mono	4a - CD14+ Mono	chr21-42422936-42423924	ENST00000635325	UBASH3A	ENSG00000160185	protein_coding	gap	chr21-42418610-42426696	0	5.50976e-08	0.0404263	0.008	0.002	0.0113994	open
CM vs HM	4 - Mono	4a - CD14+ Mono	chr3-194986023-194987235	ENST00000310380	XXYLT1	ENSG00000173950	protein_coding	utr	chr3-195068279-195069714	81043	5.51607e-08	0.0640912	0.032	0.022	0.0114125	open
CM vs HM	4 - Mono	4a - CD14+ Mono	chr5-180718456-180719539	ENST00000307832	OR2Y1	ENSG00000174339	protein_coding	utr	chr5-180739042-180739122	19502	5.55492e-08	0.0271758	0.003	0	0.0114929	open
CM vs HM	4 - Mono	4a - CD14+ Mono	chr1-32263440-32264479	ENST00000495610	LCK	ENSG00000182866	protein_coding	gap	chr1-32251372-32274324	0	5.55618e-08	0.0489831	0.007	0.001	0.0114955	open
CM vs HM	4 - Mono	4a - CD14+ Mono	chr14-101819210-101820207	ENST00000557714	PPP2R5C	ENSG00000078304	protein_coding	gap	chr14-101810037-101831700	0	5.56286e-08	0.0374413	0.016	0.011	0.0115093	open
CM vs HM	4 - Mono	4a - CD14+ Mono	chr16-74367648-74368673	ENST00000563701	RP11-252A24.3	ENSG00000261079	lincRNA	exon	chr16-74367462-74369826	0	5.60369e-08	0.0538561	0.171	0.172	0.0115938	open
CM vs HM	4 - Mono	4a - CD14+ Mono	chr19-1180148-1181245	ENST00000585748	STK11	ENSG00000118046	protein_coding	gap	chr19-1179334-1189408	0	5.65943e-08	-0.256185	0.096	0.21	0.0117091	closed
CM vs HM	4 - Mono	4a - CD14+ Mono	chr3-45976355-45977362	ENST00000535325	FYCO1	ENSG00000163820	protein_coding	gap	chr3-45975346-45979704	0	5.68474e-08	0.0259445	0.004	0.001	0.0117614	open
CM vs HM	4 - Mono	4a - CD14+ Mono	chr11-111586035-111587113	ENST00000304987	SIK2	ENSG00000170145	protein_coding	exon	chr11-111602391-111602698	15277	5.69934e-08	0.0415399	0.024	0.017	0.0117917	open
CM vs HM	4 - Mono	4a - CD14+ Mono	chr3-42071930-42073343	ENST00000487159	TRAK1	ENSG00000182606	protein_coding	gap	chr3-42014118-42087103	0	5.71524e-08	-0.230814	0.025	0.084	0.0118245	closed
CM vs HM	4 - Mono	4a - CD14+ Mono	chr4-25312229-25313190	ENST00000612982	ZCCHC4	ENSG00000168228	protein_coding	cds	chr4-25312882-25312936	0	5.72615e-08	-0.275704	0.125	0.264	0.0118471	closed
CM vs HM	4 - Mono	4a - CD14+ Mono	chr9-89421784-89422869	ENST00000540475	SEMA4D	ENSG00000187764	protein_coding	gap	chr9-89405700-89455887	0	5.72734e-08	0.0554542	0.042	0.031	0.0118496	open
CM vs HM	4 - Mono	4a - CD14+ Mono	chr19-17679719-17680812	ENST00000552293	UNC13A	ENSG00000130477	protein_coding	gap	chr19-17676042-17688177	0	5.74754e-08	0.0423484	0.065	0.061	0.0118914	open
CM vs HM	4 - Mono	4a - CD14+ Mono	chr1-226100187-226101492	ENST00000412855	RP11-396C23.2	ENSG00000225518	lincRNA	exon	chr1-226090225-226090292	9894	5.76783e-08	0.0441356	0.046	0.04	0.0119333	open
CM vs HM	4 - Mono	4a - CD14+ Mono	chr20-38043703-38044486	ENST00000495457	RPRD1B	ENSG00000101413	protein_coding	gap	chr20-38040565-38057531	0	5.77569e-08	0.0387808	0.008	0.002	0.0119496	open
CM vs HM	4 - Mono	4a - CD14+ Mono	chr7-66283260-66284137	ENST00000480281	TPST1	ENSG00000169902	protein_coding	gap	chr7-66205523-66286510	0	5.77686e-08	0.0782234	0.015	0.004	0.011952	open
CM vs HM	4 - Mono	4a - CD14+ Mono	chr16-29611942-29612818	ENST00000395389	SPN	ENSG00000197471	protein_coding	exon	chr16-29662979-29663080	50160	5.84653e-08	0.0527568	0.048	0.04	0.0120962	open
CM vs HM	4 - Mono	4a - CD14+ Mono	chr17-78652582-78653575	ENST00000591455	CYTH1	ENSG00000108669	protein_coding	utr	chr17-78674048-78676090	20472	5.85929e-08	0.100906	0.036	0.017	0.0121226	open
CM vs HM	4 - Mono	4a - CD14+ Mono	chr14-97977690-97978749	ENST00000556462	LINC01550	ENSG00000246223	lincRNA	gap	chr14-97969471-97977976	0	5.89256e-08	0.0338563	0.009	0.005	0.0121914	open
CM vs HM	4 - Mono	4a - CD14+ Mono	chr8-61766729-61767790	ENST00000505627	RP11-280G9.1	ENSG00000251127	lincRNA	exon	chr8-61765891-61765969	759	5.8961e-08	0.0532399	0.047	0.039	0.0121987	open
CM vs HM	4 - Mono	4a - CD14+ Mono	chrX-2766746-2768388	ENST00000509484	XG	ENSG00000124343	protein_coding	gap	chrX-2752336-2782065	0	5.90965e-08	0.0598178	0.04	0.029	0.0122268	open
CM vs HM	4 - Mono	4a - CD14+ Mono	chr19-51019826-51020673	ENST00000599077	KLK10	ENSG00000129451	protein_coding	utr	chr19-51020068-51020175	0	6.06153e-08	0.0434821	0.016	0.009	0.012541	open
CM vs HM	4 - Mono	4a - CD14+ Mono	chr14-103372318-103373373	ENST00000440884	MARK3	ENSG00000075413	protein_coding	exon	chr14-103385392-103386080	12018	6.10811e-08	0.0855838	0.024	0.01	0.0126374	open
CM vs HM	4 - Mono	4a - CD14+ Mono	chr17-74416947-74418059	ENST00000363151	RNA5SP448	ENSG00000200021	rRNA	exon	chr17-74417594-74417704	0	6.10867e-08	0.0339279	0.016	0.011	0.0126385	open
CM vs HM	4 - Mono	4a - CD14+ Mono	chr17-68313404-68314256	ENST00000621439	ARSG	ENSG00000141337	protein_coding	gap	chr17-68307712-68343603	0	6.11181e-08	0.0625874	0.072	0.064	0.012645	open
CM vs HM	4 - Mono	4a - CD14+ Mono	chr17-75534805-75535813	ENST00000580578	LLGL2	ENSG00000073350	protein_coding	gap	chr17-75525175-75543396	0	6.14206e-08	0.0353329	0.01	0.006	0.0127076	open
CM vs HM	4 - Mono	4a - CD14+ Mono	chr13-41462903-41463924	ENST00000379359	RGCC	ENSG00000102760	protein_coding	gap	chr13-41458471-41466822	0	6.1612e-08	0.0326351	0.071	0.068	0.0127472	open
CM vs HM	4 - Mono	4a - CD14+ Mono	chr21-30491562-30492428	ENST00000334063	KRTAP19-3	ENSG00000244025	protein_coding	cds	chr21-30491712-30491957	0	6.20724e-08	0.0362646	0.004	0	0.0128425	open
CM vs HM	4 - Mono	4a - CD14+ Mono	chr5-87120205-87121017	ENST00000515750	RP11-72L22.1	ENSG00000249061	lincRNA	gap	chr5-87120195-87137453	0	6.25206e-08	0.065598	0.022	0.012	0.0129352	open
CM vs HM	4 - Mono	4a - CD14+ Mono	chr2-46929494-46930094	ENST00000487121	MCFD2	ENSG00000180398	protein_coding	gap	chr2-46909178-46941571	0	6.25917e-08	0.0342522	0.004	0	0.0129499	open
CM vs HM	4 - Mono	4a - CD14+ Mono	chr6-116392204-116393237	ENST00000607094	DSE	ENSG00000111817	protein_coding	gap	chr6-116279732-116399197	0	6.28701e-08	0.0186951	0.092	0.094	0.0130075	open
CM vs HM	4 - Mono	4a - CD14+ Mono	chr2-98448106-98449088	ENST00000409851	INPP4A	ENSG00000040933	protein_coding	gap	chr2-98445086-98518963	0	6.32391e-08	0.0425913	0.012	0.006	0.0130838	open
CM vs HM	4 - Mono	4a - CD14+ Mono	chr5-175665959-175666885	ENST00000377291	HRH2	ENSG00000113749	protein_coding	gap	chr5-175658156-175682708	0	6.33307e-08	0.0635227	0.017	0.008	0.0131028	open
CM vs HM	4 - Mono	4a - CD14+ Mono	chr2-143263035-143263883	ENST00000552641	ARHGAP15	ENSG00000075884	protein_coding	gap	chr2-143250601-143435600	0	6.35787e-08	0.0553594	0.03	0.021	0.0131541	open
CM vs HM	4 - Mono	4a - CD14+ Mono	chr11-60985876-60986877	ENST00000545320	CD6	ENSG00000013725	protein_coding	gap	chr11-60971915-60987907	0	6.41651e-08	0.0184019	0.021	0.019	0.0132754	open
CM vs HM	4 - Mono	4a - CD14+ Mono	chr19-44760595-44761547	ENST00000164227	BCL3	ENSG00000069399	protein_coding	utr	chr19-44759616-44760044	550	6.45409e-08	0.0456735	0.03	0.023	0.0133532	open
CM vs HM	4 - Mono	4a - CD14+ Mono	chr3-119351861-119352808	ENST00000482743	ARHGAP31	ENSG00000031081	protein_coding	gap	chr3-119324959-119365315	0	6.52392e-08	0.0411787	0.096	0.096	0.0134977	open
CM vs HM	4 - Mono	4a - CD14+ Mono	chr15-73632981-73633922	ENST00000565325	NPTN	ENSG00000156642	protein_coding	cds	chr15-73633125-73633215	0	6.5323e-08	-0.232556	0.208	0.375	0.013515	closed
CM vs HM	4 - Mono	4a - CD14+ Mono	chr17-16418710-16420549	ENST00000455666	TRPV2	ENSG00000187688	protein_coding	cds	chr17-16420115-16420248	0	6.55494e-08	0.0492591	0.025	0.017	0.0135618	open
CM vs HM	4 - Mono	4a - CD14+ Mono	chr2-36951132-36952189	ENST00000379213	STRN	ENSG00000115808	protein_coding	gap	chr2-36925209-36966229	0	6.56372e-08	0.0443698	0.008	0.002	0.01358	open
CM vs HM	4 - Mono	4a - CD14+ Mono	chr2-231425695-231426658	ENST00000287590	B3GNT7	ENSG00000156966	protein_coding	utr	chr2-231398926-231401164	24530	6.60847e-08	0.0411574	0.008	0.003	0.0136726	open
CM vs HM	4 - Mono	4a - CD14+ Mono	chr9-37061741-37062372	ENST00000426358	LINC01400	ENSG00000232920	lincRNA	exon	chr9-37073531-37073867	11158	6.62335e-08	0.0671332	0.008	0	0.0137034	open
CM vs HM	4 - Mono	4a - CD14+ Mono	chr8-96364832-96365825	ENST00000523862	KB-1448A5.1	ENSG00000253105	lincRNA	exon	chr8-96371865-96372230	6039	6.63391e-08	0.0408927	0.012	0.006	0.0137252	open
CM vs HM	4 - Mono	4a - CD14+ Mono	chr20-1415735-1416747	ENST00000439640	FKBP1A	ENSG00000088832	protein_coding	exon	chr20-1392962-1393172	22562	6.65379e-08	0.0507187	0.013	0.006	0.0137664	open
CM vs HM	4 - Mono	4a - CD14+ Mono	chr1-53600100-53601231	ENST00000628545	GLIS1	ENSG00000174332	protein_coding	cds	chr1-53600101-53600278	0	6.67097e-08	0.0519395	0.007	0.001	0.0138019	open
CM vs HM	4 - Mono	4a - CD14+ Mono	chr15-100721438-100722521	ENST00000559755	RP11-66B24.5	ENSG00000259579	lincRNA	gap	chr15-100716372-100819413	0	6.68271e-08	0.072878	0.118	0.107	0.0138262	open
CM vs HM	4 - Mono	4a - CD14+ Mono	chr5-180034500-180035202	ENST00000522208	RNF130	ENSG00000113269	protein_coding	gap	chr5-180013312-180040452	0	6.69761e-08	0.0474627	0.012	0.006	0.013857	open
CM vs HM	4 - Mono	4a - CD14+ Mono	chr2-145593754-145594635	ENST00000420548	AC092484.1	ENSG00000225107	lincRNA	exon	chr2-145587988-145588024	5729	6.70047e-08	0.0515615	0.016	0.008	0.0138629	open
CM vs HM	4 - Mono	4a - CD14+ Mono	chr1-235933063-235934162	ENST00000438371	RP5-940F7.2	ENSG00000237845	lincRNA	exon	chr1-235942553-235943053	8390	6.75448e-08	-0.22794	0.021	0.076	0.0139747	closed
CM vs HM	4 - Mono	4a - CD14+ Mono	chr18-39190212-39191202	ENST00000591629	RP11-244M2.1	ENSG00000267374	lincRNA	exon	chr18-39206924-39208789	15721	6.75766e-08	0.0993486	0.021	0.007	0.0139813	open
CM vs HM	4 - Mono	4a - CD14+ Mono	chr8-8299203-8300343	ENST00000622241	SGK223	ENSG00000275342	protein_coding	utr	chr8-8317736-8318153	17392	6.87743e-08	0.0281429	0.003	0	0.0142291	open
CM vs HM	4 - Mono	4a - CD14+ Mono	chr9-16401312-16402345	ENST00000380672	BNC2	ENSG00000173068	protein_coding	utr	chr9-16409503-16418988	7157	6.99122e-08	-0.129476	0.004	0.026	0.0144645	closed
CM vs HM	4 - Mono	4a - CD14+ Mono	chr4-39044141-39045338	ENST00000508137	KLHL5	ENSG00000109790	protein_coding	utr	chr4-39045060-39045096	0	7.03748e-08	-0.227155	0.165	0.308	0.0145602	closed
CM vs HM	4 - Mono	4a - CD14+ Mono	chr18-48928529-48929585	ENST00000591805	SMAD7	ENSG00000101665	protein_coding	gap	chr18-48921911-48942480	0	7.03869e-08	0.0290868	0.036	0.03	0.0145627	open
CM vs HM	4 - Mono	4a - CD14+ Mono	chr22-33544519-33545670	ENST00000421768	LARGE1	ENSG00000133424	protein_coding	gap	chr22-33432266-33564847	0	7.18143e-08	0.0238088	0.003	0	0.014858	open
CM vs HM	4 - Mono	4a - CD14+ Mono	chr6-137823708-137824969	ENST00000612899	TNFAIP3	ENSG00000118503	protein_coding	exon	chr6-137867188-137867542	42218	7.22386e-08	0.00898696	0.079	0.082	0.0149458	open
CM vs HM	4 - Mono	4a - CD14+ Mono	chr18-69981765-69982665	ENST00000579496	CD226	ENSG00000150637	protein_coding	exon	chr18-69961592-69961803	19961	7.42196e-08	0.0324801	0.004	0	0.0153557	open
CM vs HM	4 - Mono	4a - CD14+ Mono	chr17-80678387-80679686	ENST00000577161	RPTOR	ENSG00000141564	protein_coding	gap	chr17-80643811-80707840	0	7.45731e-08	0.066175	0.044	0.031	0.0154288	open
CM vs HM	4 - Mono	4a - CD14+ Mono	chr8-93888013-93888948	ENST00000523021	PDP1	ENSG00000164951	protein_coding	gap	chr8-93858195-93921226	0	7.46212e-08	0.070619	0.026	0.013	0.0154387	open
CM vs HM	4 - Mono	4a - CD14+ Mono	chr15-38652708-38653714	ENST00000560203	RP11-275I4.2	ENSG00000259747	lincRNA	exon	chr15-38671847-38671940	18132	7.48146e-08	0.0488213	0.012	0.006	0.0154788	open
CM vs HM	4 - Mono	4a - CD14+ Mono	chr17-36182749-36184208	ENST00000616006	TBC1D3B	ENSG00000274808	protein_coding	exon	chr17-36176480-36176636	6112	7.55417e-08	-0.278986	0.051	0.147	0.0156292	closed
CM vs HM	4 - Mono	4a - CD14+ Mono	chrX-13647385-13648388	ENST00000490617	TCEANC	ENSG00000176896	protein_coding	exon	chrX-13653189-13653312	4800	7.57279e-08	0.0734878	0.029	0.017	0.0156677	open
CM vs HM	4 - Mono	4a - CD14+ Mono	chr17-44110778-44111800	ENST00000591714	HDAC5	ENSG00000108840	protein_coding	cds	chr17-44110729-44110879	0	7.60711e-08	-0.245406	0.046	0.124	0.0157387	closed
CM vs HM	4 - Mono	4a - CD14+ Mono	chr4-1511181-1512324	ENST00000608161	RP13-1016M1.2	ENSG00000272783	lincRNA	exon	chr4-1550284-1550572	37959	7.7158e-08	0.119153	0.032	0.014	0.0159636	open
CM vs HM	4 - Mono	4a - CD14+ Mono	chr4-74659353-74660437	ENST00000395743	BTC	ENSG00000174808	protein_coding	utr	chr4-74744759-74746675	84321	7.75166e-08	0.0322999	0.044	0.04	0.0160378	open
CM vs HM	4 - Mono	4a - CD14+ Mono	chr18-48940383-48941414	ENST00000591805	SMAD7	ENSG00000101665	protein_coding	gap	chr18-48921911-48942480	0	7.83141e-08	0.0224046	0.021	0.018	0.0162028	open
CM vs HM	4 - Mono	4a - CD14+ Mono	chr10-97541793-97542739	ENST00000370664	UBTD1	ENSG00000165886	protein_coding	gap	chr10-97499274-97567913	0	7.84689e-08	0.0474735	0.035	0.028	0.0162348	open
CM vs HM	4 - Mono	4a - CD14+ Mono	chr3-71806453-71807816	ENST00000353065	PROK2	ENSG00000163421	protein_coding	exon	chr3-71784957-71785206	21246	7.896e-08	0.108203	0.029	0.012	0.0163364	open
CM vs HM	4 - Mono	4a - CD14+ Mono	chr20-10488208-10489426	ENST00000334534	SLX4IP	ENSG00000149346	protein_coding	gap	chr20-10458232-10556230	0	7.93856e-08	0.0214428	0.103	0.109	0.0164245	open
CM vs HM	4 - Mono	4a - CD14+ Mono	chr9-107760532-107761696	ENST00000410527	RNA5SP293	ENSG00000222459	rRNA	exon	chr9-107918866-107918978	157169	7.96403e-08	-0.277428	0.096	0.225	0.0164772	closed
CM vs HM	4 - Mono	4a - CD14+ Mono	chr22-50576879-50578056	ENST00000457250	CPT1B	ENSG00000205560	protein_coding	cds	chr22-50577775-50577915	0	8.01634e-08	0.0904942	0.022	0.009	0.0165854	open
CM vs HM	4 - Mono	4a - CD14+ Mono	chr6-16762763-16763729	ENST00000606924	RP1-151F17.2	ENSG00000272341	lincRNA	exon	chr6-16764346-16766883	616	8.24622e-08	0.0373816	0.052	0.048	0.017061	open
CM vs HM	4 - Mono	4a - CD14+ Mono	chr12-52566561-52567590	ENST00000549343	KRT74	ENSG00000170484	protein_coding	cds	chr12-52566969-52567168	0	8.28373e-08	0.0574921	0.009	0.002	0.0171386	open
CM vs HM	4 - Mono	4a - CD14+ Mono	chr1-205679422-205680910	ENST00000367145	SLC45A3	ENSG00000158715	protein_coding	utr	chr1-205680394-205680459	0	8.3505e-08	0.0411181	0.042	0.038	0.0172768	open
CM vs HM	4 - Mono	4a - CD14+ Mono	chr15-45278503-45279859	ENST00000347644	SLC28A2	ENSG00000137860	protein_coding	utr	chr15-45275514-45277845	657	8.39407e-08	-0.238637	0.151	0.289	0.0173669	closed
CM vs HM	4 - Mono	4a - CD14+ Mono	chr11-124731879-124732938	ENST00000284292	NRGN	ENSG00000154146	protein_coding	exon	chr11-124739846-124740099	6907	8.43582e-08	-0.228121	0.028	0.091	0.0174533	closed
CM vs HM	4 - Mono	4a - CD14+ Mono	chr7-146645079-146645984	ENST00000637150	CNTNAP2	ENSG00000174469	protein_coding	gap	chr7-146116974-146774270	0	8.43965e-08	0.0432014	0.004	0	0.0174612	open
CM vs HM	4 - Mono	4a - CD14+ Mono	chr7-142798221-142799499	ENST00000632998	PRSS2	ENSG00000275896	protein_coding	utr	chr7-142774509-142774564	23656	8.65886e-08	0.02648	0.008	0.004	0.0179147	open
CM vs HM	4 - Mono	4a - CD14+ Mono	chr17-64362562-64363668	ENST00000563924	PECAM1	ENSG00000261371	protein_coding	cds	chr17-64363149-64363397	0	8.67331e-08	0.0535179	0.031	0.022	0.0179446	open
CM vs HM	4 - Mono	4a - CD14+ Mono	chr2-121699106-121700173	ENST00000285814	NIFK	ENSG00000155438	protein_coding	utr	chr2-121726945-121727723	26771	8.69128e-08	0.0551907	0.113	0.11	0.0179818	open
CM vs HM	4 - Mono	4a - CD14+ Mono	chr17-32127072-32128028	ENST00000613639	CTD-2095E4.5	ENSG00000277511	lincRNA	exon	chr17-32127595-32128454	0	8.71552e-08	-0.261032	0.1	0.216	0.018032	closed
CM vs HM	4 - Mono	4a - CD14+ Mono	chr14-103118732-103119717	ENST00000558224	LINC00677	ENSG00000259717	lincRNA	exon	chr14-103120847-103121031	1129	8.75359e-08	-0.218584	0.159	0.297	0.0181107	closed
CM vs HM	4 - Mono	4a - CD14+ Mono	chr1-171434416-171435608	ENST00000367742	PRRC2C	ENSG00000117523	protein_coding	exon	chr1-171485551-171485735	49942	8.84755e-08	0.0671711	0.044	0.033	0.0183051	open
CM vs HM	4 - Mono	4a - CD14+ Mono	chr8-130527732-130528779	ENST00000523502	KB-1568E2.1	ENSG00000253656	lincRNA	exon	chr8-130595299-130596991	66519	8.89269e-08	0.0435045	0.011	0.005	0.0183985	open
CM vs HM	4 - Mono	4a - CD14+ Mono	chr10-114540928-114542030	ENST00000533213	ABLIM1	ENSG00000099204	protein_coding	gap	chr10-114491879-114545004	0	8.9225e-08	0.0182335	0.017	0.015	0.0184602	open
CM vs HM	4 - Mono	4a - CD14+ Mono	chr4-183830276-183831258	ENST00000513034	STOX2	ENSG00000173320	protein_coding	gap	chr4-183798056-184001324	0	8.94024e-08	0.055359	0.019	0.011	0.0184969	open
CM vs HM	4 - Mono	4a - CD14+ Mono	chr17-68317999-68319001	ENST00000621439	ARSG	ENSG00000141337	protein_coding	gap	chr17-68307712-68343603	0	8.98978e-08	0.0521122	0.037	0.029	0.0185994	open
CM vs HM	4 - Mono	4a - CD14+ Mono	chr2-30231024-30233223	ENST00000412933	LBH	ENSG00000213626	protein_coding	cds	chr2-30231739-30231764	0	8.9969e-08	-0.00401598	0.094	0.106	0.0186141	closed
CM vs HM	4 - Mono	4a - CD14+ Mono	chr19-8355459-8356355	ENST00000601886	ANGPTL4	ENSG00000167772	protein_coding	exon	chr19-8363289-8363362	6933	8.99875e-08	0.0666961	0.02	0.01	0.018618	open
CM vs HM	4 - Mono	4a - CD14+ Mono	chr9-503935-505381	ENST00000619269	KANK1	ENSG00000107104	protein_coding	utr	chr9-504695-504754	0	8.99919e-08	0.0618898	0.056	0.045	0.0186189	open
CM vs HM	4 - Mono	4a - CD14+ Mono	chr19-49921648-49922587	ENST00000601717	IL4I1	ENSG00000104951	protein_coding	gap	chr19-49904322-49927693	0	9.0112e-08	0.0664929	0.012	0.003	0.0186437	open
CM vs HM	4 - Mono	4a - CD14+ Mono	chr11-119218153-119219220	ENST00000637974	CBL	ENSG00000110395	protein_coding	gap	chr11-119206613-119232447	0	9.04918e-08	0.045034	0.008	0.002	0.0187223	open
CM vs HM	4 - Mono	4a - CD14+ Mono	chr1-54230542-54231656	ENST00000610401	SSBP3	ENSG00000157216	protein_coding	gap	chr1-54228827-54239128	0	9.04938e-08	0.0485612	0.04	0.032	0.0187227	open
CM vs HM	4 - Mono	4a - CD14+ Mono	chr9-115008234-115009305	ENST00000535648	TNC	ENSG00000041982	protein_coding	utr	chr9-115019578-115021156	10272	9.08534e-08	0.0592644	0.052	0.043	0.0187971	open
CM vs HM	4 - Mono	4a - CD14+ Mono	chr7-93430636-93431856	ENST00000426151	CALCR	ENSG00000004948	protein_coding	gap	chr7-93426590-93434252	0	9.24654e-08	0.0388058	0.004	0	0.0191306	open
CM vs HM	4 - Mono	4a - CD14+ Mono	chr16-17013355-17014381	ENST00000261381	XYLT1	ENSG00000103489	protein_coding	utr	chr16-17101769-17108694	87387	9.41506e-08	0.0348865	0.015	0.01	0.0194793	open
CM vs HM	4 - Mono	4a - CD14+ Mono	chr5-55868558-55869572	ENST00000611895	IL31RA	ENSG00000164509	protein_coding	cds	chr5-55868791-55868908	0	9.48942e-08	0.0881502	0.037	0.024	0.0196331	open
CM vs HM	4 - Mono	4a - CD14+ Mono	chr2-212938476-212939358	ENST00000437261	AC108066.1	ENSG00000223373	lincRNA	exon	chr2-212919432-212919809	18666	9.5541e-08	0.0161227	0.002	0	0.019767	open
CM vs HM	4 - Mono	4a - CD14+ Mono	chr12-10292956-10294265	ENST00000544747	KLRD1	ENSG00000134539	protein_coding	gap	chr12-10226234-10307977	0	9.68317e-08	0.0345532	0.005	0.001	0.020034	open
CM vs HM	4 - Mono	4a - CD14+ Mono	chr19-39407388-39408284	ENST00000600033	ZFP36	ENSG00000128016	protein_coding	cds	chr19-39407743-39408143	0	9.6973e-08	0.0144738	0.133	0.144	0.0200632	open
CM vs HM	4 - Mono	4a - CD14+ Mono	chr19-43783673-43784768	ENST00000262888	KCNN4	ENSG00000104783	protein_coding	exon	chr19-43780703-43781257	2415	9.83295e-08	0.0495368	0.032	0.024	0.0203439	open
CM vs HM	4 - Mono	4a - CD14+ Mono	chr1-212401530-212402498	ENST00000535273	TMEM206	ENSG00000065600	protein_coding	gap	chr1-212387101-212410424	0	9.88252e-08	0.0432214	0.016	0.01	0.0204464	open
CM vs HM	4 - Mono	4a - CD14+ Mono	chr21-33975384-33977256	ENST00000607953	AP000569.9	ENSG00000273102	lincRNA	exon	chr21-33968233-33968573	6810	1.00037e-07	0.0382676	0.097	0.097	0.0206971	open
CM vs HM	4 - Mono	4a - CD14+ Mono	chr4-3202023-3203242	ENST00000510626	HTT	ENSG00000197386	protein_coding	gap	chr4-3199940-3204006	0	1.00913e-07	0.0480703	0.049	0.042	0.0208785	open
CM vs HM	4 - Mono	4a - CD14+ Mono	chr16-1244815-1246110	ENST00000461509	TPSAB1	ENSG00000172236	protein_coding	utr	chr16-1242241-1242554	2260	1.01686e-07	0.0693843	0.02	0.009	0.0210383	open
CM vs HM	4 - Mono	4a - CD14+ Mono	chr14-91228144-91229126	ENST00000256324	C14orf159	ENSG00000133943	protein_coding	utr	chr14-91224834-91225632	2511	1.02217e-07	0.0395668	0.015	0.01	0.0211482	open
CM vs HM	4 - Mono	4a - CD14+ Mono	chr1-84365342-84366585	ENST00000454967	SAMD13	ENSG00000203943	protein_coding	gap	chr1-84325749-84388279	0	1.03582e-07	0.0542068	0.023	0.014	0.0214306	open
CM vs HM	4 - Mono	4a - CD14+ Mono	chr7-17234055-17235170	ENST00000242057	AHR	ENSG00000106546	protein_coding	exon	chr7-17298622-17299329	63451	1.05434e-07	-0.0124189	0.199	0.234	0.0218139	closed
CM vs HM	4 - Mono	4a - CD14+ Mono	chr8-22443417-22444495	ENST00000522000	PPP3CC	ENSG00000120910	protein_coding	gap	chr8-22441459-22474953	0	1.06034e-07	0.0279013	0.012	0.009	0.0219379	open
CM vs HM	4 - Mono	4a - CD14+ Mono	chr11-72761039-72761582	ENST00000546314	STARD10	ENSG00000214530	protein_coding	gap	chr11-72759382-72780974	0	1.06317e-07	0.0472423	0.008	0.002	0.0219964	open
CM vs HM	4 - Mono	4a - CD14+ Mono	chr19-19597593-19599520	ENST00000558222	PBX4	ENSG00000105717	protein_coding	cds	chr19-19599292-19599365	0	1.07084e-07	0.0258151	0.02	0.016	0.0221551	open
CM vs HM	4 - Mono	4a - CD14+ Mono	chr17-39769721-39770899	ENST00000623724	IKZF3	ENSG00000161405	protein_coding	gap	chr17-39766494-39777650	0	1.07362e-07	0.0454836	0.009	0.003	0.0222126	open
CM vs HM	4 - Mono	4a - CD14+ Mono	chr11-121481710-121482852	ENST00000532451	SORL1	ENSG00000137642	protein_coding	gap	chr11-121478244-121488031	0	1.07427e-07	0.0306692	0.029	0.024	0.0222261	open
CM vs HM	4 - Mono	4a - CD14+ Mono	chr1-235011549-235012583	ENST00000549744	RP11-443B7.3	ENSG00000258082	lincRNA	exon	chr1-234980656-234980804	30744	1.0764e-07	0.000681283	0.187	0.21	0.0222702	open
CM vs HM	4 - Mono	4a - CD14+ Mono	chr14-81401247-81402148	ENST00000557055	STON2	ENSG00000140022	protein_coding	gap	chr14-81398581-81427101	0	1.07701e-07	0.0211824	0.076	0.077	0.0222827	open
CM vs HM	4 - Mono	4a - CD14+ Mono	chr2-88599710-88600796	ENST00000419748	EIF2AK3	ENSG00000172071	protein_coding	gap	chr2-88595664-88613723	0	1.07861e-07	0.0451735	0.032	0.024	0.0223159	open
CM vs HM	4 - Mono	4a - CD14+ Mono	chr11-58577400-58578529	ENST00000528954	LPXN	ENSG00000110031	protein_coding	cds	chr11-58578019-58578046	0	1.10366e-07	0.0116554	0.205	0.235	0.0228342	open
CM vs HM	4 - Mono	4a - CD14+ Mono	chr11-102530250-102531264	ENST00000260227	MMP7	ENSG00000137673	protein_coding	cds	chr11-102530593-102530700	0	1.10426e-07	0.0527663	0.014	0.006	0.0228466	open
CM vs HM	4 - Mono	4a - CD14+ Mono	chr16-88619654-88620687	ENST00000567085	ZC3H18	ENSG00000158545	protein_coding	gap	chr16-88599949-88622196	0	1.11084e-07	0.0206908	0.015	0.012	0.0229827	open
CM vs HM	4 - Mono	4a - CD14+ Mono	chr16-8941534-8942419	ENST00000569230	USP7	ENSG00000187555	protein_coding	gap	chr16-8930398-8964393	0	1.13268e-07	0.0748024	0.042	0.029	0.0234347	open
CM vs HM	4 - Mono	4a - CD14+ Mono	chrX-46279110-46280503	ENST00000446884	LINC01186	ENSG00000236751	lincRNA	exon	chrX-46325924-46326454	45420	1.13512e-07	0.0356566	0.006	0.001	0.023485	open
CM vs HM	4 - Mono	4a - CD14+ Mono	chr4-2689577-2690580	ENST00000637812	FAM193A	ENSG00000125386	protein_coding	cds	chr4-2689506-2689704	0	1.1447e-07	0.0641824	0.015	0.007	0.0236833	open
CM vs HM	4 - Mono	4a - CD14+ Mono	chr20-32154747-32155985	ENST00000398022	TM9SF4	ENSG00000101337	protein_coding	cds	chr20-32155103-32155186	0	1.1488e-07	-0.201538	0.207	0.35	0.0237681	closed
CM vs HM	4 - Mono	4a - CD14+ Mono	chr7-8133931-8134964	ENST00000486677	ICA1	ENSG00000003147	protein_coding	gap	chr7-8128143-8262093	0	1.15048e-07	0.0377292	0.005	0.001	0.0238028	open
CM vs HM	4 - Mono	4a - CD14+ Mono	chr12-116601351-116602384	ENST00000550742	RP11-497G19.3	ENSG00000258249	lincRNA	gap	chr12-116599668-116603497	0	1.15891e-07	0.0471624	0.045	0.038	0.0239773	open
CM vs HM	4 - Mono	4a - CD14+ Mono	chr9-93095402-93096391	ENST00000466409	CARD19	ENSG00000165233	protein_coding	cds	chr9-93096346-93096352	0	1.16008e-07	-0.12273	0.425	0.613	0.0240014	closed
CM vs HM	4 - Mono	4a - CD14+ Mono	chr3-58173420-58174492	ENST00000636316	RP11-456N14.4	ENSG00000283148	lincRNA	exon	chr3-58174478-58174975	0	1.17031e-07	0.041436	0.006	0.001	0.0242132	open
CM vs HM	4 - Mono	4a - CD14+ Mono	chr1-171744698-171745817	ENST00000236192	VAMP4	ENSG00000117533	protein_coding	exon	chr1-171741910-171742247	2450	1.17074e-07	0.08303	0.048	0.035	0.024222	open
CM vs HM	4 - Mono	4a - CD14+ Mono	chr12-6630985-6631976	ENST00000431922	LPAR5	ENSG00000184574	protein_coding	utr	chr12-6631585-6631649	0	1.17585e-07	0.0212044	0.006	0.003	0.0243278	open
CM vs HM	4 - Mono	4a - CD14+ Mono	chr16-34587796-34588658	ENST00000568121	CTD-2144E22.8	ENSG00000260854	lincRNA	exon	chr16-34978744-34979191	390085	1.18726e-07	0.0992494	0.036	0.019	0.0245638	open
CM vs HM	4 - Mono	4a - CD14+ Mono	chr8-96906832-96907809	ENST00000220763	CPQ	ENSG00000104324	protein_coding	gap	chr8-96880006-96965934	0	1.18926e-07	0.0517642	0.022	0.015	0.0246051	open
CM vs HM	4 - Mono	4a - CD14+ Mono	chr6-43798430-43799407	ENST00000637813	RP11-344J7.3	ENSG00000283573	lincRNA	exon	chr6-43803193-43803349	3785	1.19019e-07	0.0643388	0.05	0.038	0.0246245	open
CM vs HM	4 - Mono	4a - CD14+ Mono	chr1-235074797-235075837	ENST00000628622	LINC01348	ENSG00000280587	lincRNA	exon	chr1-235074103-235074220	576	1.19371e-07	0.0411174	0.04	0.033	0.0246972	open
CM vs HM	4 - Mono	4a - CD14+ Mono	GL000219.1-44571-46628	NA	NA	NA	NA	NA	NA	NA	1.19448e-07	0.0678159	0.016	0.006	0.0247131	open
CM vs HM	4 - Mono	4a - CD14+ Mono	chr17-78139991-78141254	ENST00000589691	TMC8	ENSG00000167895	protein_coding	cds	chr17-78140834-78141112	0	1.21785e-07	-0.160477	0.271	0.43	0.0251966	closed
CM vs HM	4 - Mono	4a - CD14+ Mono	chr14-99258993-99259972	ENST00000443726	BCL11B	ENSG00000127152	protein_coding	gap	chr14-99176196-99271160	0	1.22897e-07	0.0326486	0.008	0.003	0.0254268	open
CM vs HM	4 - Mono	4a - CD14+ Mono	chr20-50979896-50980937	ENST00000244051	MOCS3	ENSG00000124217	protein_coding	utr	chr20-50960226-50963931	15964	1.23782e-07	0.0475058	0.046	0.039	0.0256099	open
CM vs HM	4 - Mono	4a - CD14+ Mono	chr17-2396394-2397521	ENST00000575394	MNT	ENSG00000070444	protein_coding	gap	chr17-2388050-2400639	0	1.24339e-07	-0.21262	0.152	0.274	0.025725	closed
CM vs HM	4 - Mono	4a - CD14+ Mono	chr8-113684742-113686003	ENST00000518558	RP11-67H2.1	ENSG00000253207	lincRNA	exon	chr8-113616584-113616958	67783	1.24551e-07	-0.163826	0.01	0.046	0.0257689	closed
CM vs HM	4 - Mono	4a - CD14+ Mono	chr5-75043925-75045155	ENST00000503568	LINC01336	ENSG00000250889	lincRNA	exon	chr5-75047719-75048037	2563	1.24971e-07	0.0504486	0.014	0.006	0.0258558	open
CM vs HM	4 - Mono	4a - CD14+ Mono	chr15-38670109-38671208	ENST00000560203	RP11-275I4.2	ENSG00000259747	lincRNA	exon	chr15-38671847-38671940	638	1.25287e-07	0.020023	0.013	0.01	0.0259213	open
CM vs HM	4 - Mono	4a - CD14+ Mono	chr2-217899292-217900445	ENST00000615025	TNS1	ENSG00000079308	protein_coding	gap	chr2-217897970-217900462	0	1.25919e-07	0.0269445	0.043	0.04	0.0260521	open
CM vs HM	4 - Mono	4a - CD14+ Mono	chr3-52670436-52671484	ENST00000450271	PBRM1	ENSG00000163939	protein_coding	gap	chr3-52668646-52678499	0	1.28541e-07	0.0558704	0.104	0.097	0.0265944	open
CM vs HM	4 - Mono	4a - CD14+ Mono	chr2-144320194-144321187	ENST00000542155	GTDC1	ENSG00000121964	protein_coding	gap	chr2-144235738-144332438	0	1.31004e-07	0.0468747	0.015	0.008	0.0271041	open
CM vs HM	4 - Mono	4a - CD14+ Mono	chr6-16481345-16482326	ENST00000483591	ATXN1	ENSG00000124788	protein_coding	gap	chr6-16433097-16485971	0	1.31167e-07	0.0384405	0.012	0.008	0.0271377	open
CM vs HM	4 - Mono	4a - CD14+ Mono	chr6-14270588-14271719	ENST00000427276	LINC01108	ENSG00000226673	lincRNA	exon	chr6-14280127-14283188	8407	1.32234e-07	0.0239701	0.05	0.048	0.0273586	open
CM vs HM	4 - Mono	4a - CD14+ Mono	chr1-89608030-89608902	ENST00000330947	LRRC8B	ENSG00000197147	protein_coding	utr	chr1-89593044-89597864	10165	1.32793e-07	0.0391511	0.012	0.006	0.0274743	open
CM vs HM	4 - Mono	4a - CD14+ Mono	chr3-151395484-151396440	ENST00000488092	MED12L	ENSG00000144893	protein_coding	gap	chr3-151394868-151416311	0	1.33094e-07	0.0501378	0.027	0.018	0.0275365	open
CM vs HM	4 - Mono	4a - CD14+ Mono	chr22-20566468-20567689	ENST00000423862	MED15	ENSG00000099917	protein_coding	cds	chr22-20566467-20566536	0	1.36685e-07	0.0391587	0.012	0.007	0.0282795	open
CM vs HM	4 - Mono	4a - CD14+ Mono	chr5-132098806-132099821	ENST00000296871	CSF2	ENSG00000164400	protein_coding	utr	chr5-132075853-132076170	22635	1.37123e-07	0.0364454	0.006	0.001	0.02837	open
CM vs HM	4 - Mono	4a - CD14+ Mono	chr22-44154154-44155239	ENST00000619710	PARVB	ENSG00000188677	protein_coding	gap	chr22-44147923-44157981	0	1.39657e-07	0.0403598	0.005	0	0.0288943	open
CM vs HM	4 - Mono	4a - CD14+ Mono	chr4-84814209-84815052	ENST00000426414	WDFY3	ENSG00000163625	protein_coding	gap	chr4-84810345-84817391	0	1.40248e-07	0.0605753	0.01	0.002	0.0290167	open
CM vs HM	4 - Mono	4a - CD14+ Mono	chr2-64750693-64751710	ENST00000608423	SERTAD2	ENSG00000179833	protein_coding	exon	chr2-64750578-64750895	0	1.40463e-07	-0.0947737	0.492	0.668	0.029061	closed
CM vs HM	4 - Mono	4a - CD14+ Mono	chr6-29926625-29927707	ENST00000396634	HLA-A	ENSG00000206503	protein_coding	exon	chr6-29941260-29941319	13552	1.4047e-07	-0.245443	0.084	0.183	0.0290626	closed
CM vs HM	4 - Mono	4a - CD14+ Mono	chr6-41531481-41532719	ENST00000448211	LINC01276	ENSG00000226917	lincRNA	exon	chr6-41519376-41519852	11628	1.42192e-07	0.0396506	0.026	0.02	0.0294188	open
CM vs HM	4 - Mono	4a - CD14+ Mono	chr15-72808989-72810024	ENST00000565814	ADPGK	ENSG00000159322	protein_coding	exon	chr15-72785649-72785846	23142	1.44398e-07	0.0402665	0.007	0.002	0.0298752	open
CM vs HM	4 - Mono	4a - CD14+ Mono	chr15-85456118-85458127	ENST00000560302	AKAP13	ENSG00000170776	protein_coding	gap	chr15-85380799-85485709	0	1.44512e-07	0.0485807	0.011	0.004	0.0298988	open
CM vs HM	4 - Mono	4a - CD14+ Mono	chr5-143311187-143312032	ENST00000504572	NR3C1	ENSG00000113580	protein_coding	gap	chr5-143310214-143313998	0	1.45165e-07	0.0584364	0.012	0.004	0.0300338	open
CM vs HM	4 - Mono	4a - CD14+ Mono	chr20-51128845-51129836	ENST00000371571	KCNG1	ENSG00000026559	protein_coding	exon	chr20-51022870-51023129	105715	1.45324e-07	0.0343543	0.004	0	0.0300668	open
CM vs HM	4 - Mono	4a - CD14+ Mono	chr20-5918896-5919884	ENST00000455042	CHGB	ENSG00000089199	protein_coding	gap	chr20-5916920-5922334	0	1.47122e-07	0.0393166	0.013	0.007	0.0304388	open
CM vs HM	4 - Mono	4a - CD14+ Mono	chr10-26437791-26438963	ENST00000376236	APBB1IP	ENSG00000077420	protein_coding	utr	chr10-26438652-26438853	0	1.49787e-07	-0.223851	0.186	0.33	0.0309902	closed
CM vs HM	4 - Mono	4a - CD14+ Mono	chr9-20297434-20298367	ENST00000380338	MLLT3	ENSG00000171843	protein_coding	utr	chr9-20341665-20346442	43297	1.50014e-07	0.0385375	0.004	0	0.0310371	open
CM vs HM	4 - Mono	4a - CD14+ Mono	chr7-583759-585002	ENST00000544935	PRKAR1B	ENSG00000188191	protein_coding	cds	chr7-584508-584568	0	1.50098e-07	0.0443158	0.032	0.024	0.0310546	open
CM vs HM	4 - Mono	4a - CD14+ Mono	chr1-156096534-156097559	ENST00000502751	LMNA	ENSG00000160789	protein_coding	gap	chr1-156083185-156130616	0	1.50448e-07	0.0132229	0.132	0.141	0.0311269	open
CM vs HM	4 - Mono	4a - CD14+ Mono	chr2-196175827-196176798	ENST00000420683	STK17B	ENSG00000081320	protein_coding	utr	chr2-196176226-196176327	0	1.50796e-07	0.0369768	0.017	0.011	0.0311989	open
CM vs HM	4 - Mono	4a - CD14+ Mono	chr6-7260721-7261920	ENST00000474597	SSR1	ENSG00000124783	protein_coding	utr	chr6-7268306-7269129	6385	1.51427e-07	-0.238047	0.103	0.213	0.0313295	closed
CM vs HM	4 - Mono	4a - CD14+ Mono	chr9-8045934-8046794	ENST00000435444	RP11-29B9.2	ENSG00000231902	lincRNA	exon	chr9-7960830-7961080	84853	1.52813e-07	0.0223322	0.002	0	0.0316163	open
CM vs HM	4 - Mono	4a - CD14+ Mono	chr7-90816377-90817216	ENST00000436577	CDK14	ENSG00000058091	protein_coding	gap	chr7-90790653-90863174	0	1.52829e-07	0.0289948	0.004	0	0.0316196	open
CM vs HM	4 - Mono	4a - CD14+ Mono	chr6-116165322-116166306	ENST00000460749	NT5DC1	ENSG00000178425	protein_coding	gap	chr6-116117946-116221077	0	1.53293e-07	0.0356666	0.004	0	0.0317155	open
CM vs HM	4 - Mono	4a - CD14+ Mono	chr10-3330476-3331395	ENST00000436340	RP11-195B3.1	ENSG00000227338	lincRNA	exon	chr10-3266658-3267015	63460	1.53675e-07	0.04066	0.013	0.006	0.0317946	open
CM vs HM	4 - Mono	4a - CD14+ Mono	chr6-33694191-33695173	ENST00000605930	ITPR3	ENSG00000096433	protein_coding	cds	chr6-33694924-33695085	0	1.5397e-07	0.0253791	0.006	0.003	0.0318557	open
CM vs HM	4 - Mono	4a - CD14+ Mono	chr6-158994901-158995984	ENST00000449822	RSPH3	ENSG00000130363	protein_coding	gap	chr6-158993927-158999434	0	1.56098e-07	0.0697893	0.035	0.024	0.0322959	open
CM vs HM	4 - Mono	4a - CD14+ Mono	chr20-4665636-4666678	ENST00000379440	PRNP	ENSG00000171867	protein_coding	exon	chr20-4686236-4686512	19557	1.57614e-07	0.0103006	0.086	0.092	0.0326095	open
CM vs HM	4 - Mono	4a - CD14+ Mono	chr16-21518706-21519394	ENST00000613759	CTB-31N19.5	ENSG00000273956	lincRNA	exon	chr16-21526824-21527214	7429	1.57623e-07	0.0717962	0.051	0.039	0.0326114	open
CM vs HM	4 - Mono	4a - CD14+ Mono	chr1-32251022-32251887	ENST00000495610	LCK	ENSG00000182866	protein_coding	utr	chr1-32251274-32251371	0	1.60489e-07	0.024505	0.009	0.006	0.0332043	open
CM vs HM	4 - Mono	4a - CD14+ Mono	chrX-149479991-149480685	ENST00000340855	IDS	ENSG00000010404	protein_coding	utr	chrX-149476990-149482745	0	1.60559e-07	0.0431242	0.007	0.002	0.0332189	open
CM vs HM	4 - Mono	4a - CD14+ Mono	chr6-215297-216333	ENST00000381078	RP3-416J7.5	ENSG00000205653	lincRNA	exon	chr6-205487-206392	8904	1.61112e-07	0.027625	0.007	0.003	0.0333333	open
CM vs HM	4 - Mono	4a - CD14+ Mono	chr12-54412949-54414021	ENST00000553071	ITGA5	ENSG00000161638	protein_coding	gap	chr12-54411965-54418980	0	1.61727e-07	0.0116029	0.095	0.099	0.0334604	open
CM vs HM	4 - Mono	4a - CD14+ Mono	chr14-99605164-99606132	ENST00000502101	RP11-543C4.1	ENSG00000247970	lincRNA	gap	chr14-99604616-99624761	0	1.63958e-07	0.0321944	0.016	0.011	0.0339221	open
CM vs HM	4 - Mono	4a - CD14+ Mono	chr8-63220028-63220822	ENST00000569835	RP11-16E18.3	ENSG00000261542	lincRNA	exon	chr8-63215981-63218034	1993	1.64729e-07	0.0555687	0.011	0.003	0.0340816	open
CM vs HM	4 - Mono	4a - CD14+ Mono	chr19-703546-704539	ENST00000264560	PALM	ENSG00000099864	protein_coding	exon	chr19-708939-709151	4399	1.65712e-07	-0.173667	0.307	0.487	0.0342849	closed
CM vs HM	4 - Mono	4a - CD14+ Mono	chr18-63869151-63870195	ENST00000404622	SERPINB2	ENSG00000197632	protein_coding	exon	chr18-63871692-63871800	1496	1.66525e-07	0.0717365	0.081	0.072	0.0344532	open
CM vs HM	4 - Mono	4a - CD14+ Mono	chr13-110705737-110706709	ENST00000542709	CARS2	ENSG00000134905	protein_coding	cds	chr13-110705521-110705768	0	1.66651e-07	-0.18238	0.237	0.391	0.0344792	closed
CM vs HM	4 - Mono	4a - CD14+ Mono	chr5-132362980-132363755	ENST00000621103	AC034220.3	ENSG00000233006	processed_transcript	gap	chr5-132360117-132364934	0	1.66767e-07	0.05495	0.009	0.003	0.0345033	open
CM vs HM	4 - Mono	4a - CD14+ Mono	chr16-19091808-19092685	ENST00000568032	RP11-626G11.4	ENSG00000260430	lincRNA	gap	chr16-19087001-19093220	0	1.6712e-07	0.0287165	0.017	0.013	0.0345763	open
CM vs HM	4 - Mono	4a - CD14+ Mono	chr14-91947132-91948208	ENST00000557570	FBLN5	ENSG00000140092	protein_coding	cds	chr14-91947213-91947229	0	1.67132e-07	0.0468508	0.013	0.007	0.0345788	open
CM vs HM	4 - Mono	4a - CD14+ Mono	chr15-39171624-39172634	ENST00000561058	RP11-624L4.1	ENSG00000259345	lincRNA	gap	chr15-39071609-39273839	0	1.67981e-07	0.0675677	0.027	0.017	0.0347545	open
CM vs HM	4 - Mono	4a - CD14+ Mono	chr19-45730392-45731573	ENST00000317683	FBXO46	ENSG00000177051	protein_coding	utr	chr19-45730849-45730904	0	1.69099e-07	-0.275121	0.129	0.277	0.0349857	closed
CM vs HM	4 - Mono	4a - CD14+ Mono	chr3-51024762-51025892	ENST00000266037	DOCK3	ENSG00000088538	protein_coding	gap	chr3-50934078-51064447	0	1.72009e-07	0.0270372	0.016	0.011	0.0355879	open
CM vs HM	4 - Mono	4a - CD14+ Mono	chr13-80040440-80041587	ENST00000627044	LINC01080	ENSG00000281721	lincRNA	exon	chr13-80026219-80028283	12156	1.74888e-07	0.0335633	0.032	0.027	0.0361834	open
CM vs HM	4 - Mono	4a - CD14+ Mono	chr17-7841156-7843167	ENST00000571047	KDM6B	ENSG00000132510	protein_coding	gap	chr17-7840371-7844900	0	1.74989e-07	-0.000707269	0.378	0.452	0.0362043	closed
CM vs HM	4 - Mono	4a - CD14+ Mono	chr22-36374592-36375339	ENST00000216181	MYH9	ENSG00000100345	protein_coding	gap	chr22-36349256-36387806	0	1.75207e-07	0.0442406	0.021	0.014	0.0362494	open
CM vs HM	4 - Mono	4a - CD14+ Mono	chr22-40247645-40248695	ENST00000454349	TNRC6B	ENSG00000100354	protein_coding	gap	chr22-40246103-40251178	0	1.76122e-07	0.0238254	0.008	0.005	0.0364388	open
CM vs HM	4 - Mono	4a - CD14+ Mono	chr2-200634935-200635961	ENST00000485106	AOX1	ENSG00000138356	protein_coding	gap	chr2-200634916-200636910	0	1.77287e-07	0.0885151	0.044	0.029	0.0366798	open
CM vs HM	4 - Mono	4a - CD14+ Mono	chr14-20848272-20849437	ENST00000556197	RP11-219E7.3	ENSG00000259130	lincRNA	exon	chr14-20870278-20870456	20840	1.78034e-07	0.0310715	0.032	0.027	0.0368344	open
CM vs HM	4 - Mono	4a - CD14+ Mono	chr2-241740757-241741704	ENST00000436747	D2HGDH	ENSG00000180902	protein_coding	cds	chr2-241741033-241741090	0	1.78313e-07	0.0914305	0.033	0.018	0.036892	open
CM vs HM	4 - Mono	4a - CD14+ Mono	chr14-99286888-99287923	ENST00000443726	BCL11B	ENSG00000127152	protein_coding	exon	chr14-99271161-99271524	15363	1.80077e-07	0.0345556	0.006	0.002	0.037257	open
CM vs HM	4 - Mono	4a - CD14+ Mono	chr7-155306253-155307141	ENST00000476756	INSIG1	ENSG00000186480	protein_coding	gap	chr7-155303896-155308240	0	1.84632e-07	0.056283	0.012	0.004	0.0381995	open
CM vs HM	4 - Mono	4a - CD14+ Mono	chr21-44897409-44898453	ENST00000523323	ITGB2	ENSG00000160255	protein_coding	gap	chr21-44895061-44899066	0	1.85364e-07	-0.164449	0.028	0.08	0.038351	closed
CM vs HM	4 - Mono	4a - CD14+ Mono	chr2-136327072-136328119	ENST00000241393	CXCR4	ENSG00000121966	protein_coding	exon	chr2-136118046-136118165	208906	1.85893e-07	0.0319698	0.021	0.017	0.0384602	open
CM vs HM	4 - Mono	4a - CD14+ Mono	chr17-28576516-28577450	ENST00000584086	ALDOC	ENSG00000109107	protein_coding	utr	chr17-28576801-28576895	0	1.88593e-07	-0.205541	0.141	0.259	0.0390189	closed
CM vs HM	4 - Mono	4a - CD14+ Mono	chr9-115118330-115119254	ENST00000350763	TNC	ENSG00000041982	protein_coding	exon	chr9-115117982-115118257	72	1.88632e-07	0.0276627	0.003	0	0.0390271	open
CM vs HM	4 - Mono	4a - CD14+ Mono	chr13-114031285-114031972	ENST00000542651	RASA3	ENSG00000185989	protein_coding	gap	chr13-114029888-114035625	0	1.88643e-07	0.0396465	0.007	0.002	0.0390292	open
CM vs HM	4 - Mono	4a - CD14+ Mono	chr18-25544340-25545539	ENST00000579111	ZNF521	ENSG00000198795	protein_coding	exon	chr18-25352005-25352190	192149	1.88795e-07	-0.228186	0.015	0.068	0.0390608	closed
CM vs HM	4 - Mono	4a - CD14+ Mono	chr6-139539896-139541063	ENST00000454788	LINC01625	ENSG00000238099	lincRNA	exon	chr6-139474566-139474596	65299	1.89564e-07	0.0665341	0.029	0.019	0.0392198	open
CM vs HM	4 - Mono	4a - CD14+ Mono	chr11-64185491-64186620	ENST00000543847	STIP1	ENSG00000168439	protein_coding	cds	chr11-64186262-64186270	0	1.89785e-07	-0.167778	0.358	0.549	0.0392656	closed
CM vs HM	4 - Mono	4a - CD14+ Mono	chr1-2275830-2276845	ENST00000508416	SKI	ENSG00000157933	protein_coding	gap	chr1-2232670-2302977	0	1.90578e-07	0.0800717	0.03	0.017	0.0394295	open
CM vs HM	4 - Mono	4a - CD14+ Mono	chr18-564976-565862	ENST00000327228	CETN1	ENSG00000177143	protein_coding	exon	chr18-580357-582114	14494	1.90799e-07	0.0291388	0.003	0	0.0394755	open
CM vs HM	4 - Mono	4a - CD14+ Mono	chr2-112624031-112625169	ENST00000457336	AC079922.3	ENSG00000237753	lincRNA	exon	chr2-112641832-112641982	16662	1.91253e-07	0.0490146	0.06	0.054	0.0395693	open
CM vs HM	4 - Mono	4a - CD14+ Mono	chr22-41217311-41218405	ENST00000481902	L3MBTL2	ENSG00000100395	protein_coding	gap	chr22-41217203-41219418	0	1.91553e-07	-0.250422	0.096	0.206	0.0396314	closed
CM vs HM	4 - Mono	4a - CD14+ Mono	chr6-10659163-10661393	ENST00000460742	C6orf52	ENSG00000137434	protein_coding	utr	chr6-10671418-10671455	10024	1.92681e-07	0.0861591	0.019	0.006	0.0398648	open
CM vs HM	4 - Mono	4a - CD14+ Mono	chr1-51234456-51235405	ENST00000366181	LINC01562	ENSG00000203356	lincRNA	gap	chr1-51197329-51234964	0	1.9358e-07	0.0455004	0.043	0.035	0.0400508	open
CM vs HM	4 - Mono	4a - CD14+ Mono	chr1-226798320-226799492	ENST00000366784	ITPKB	ENSG00000143772	protein_coding	exon	chr1-226739041-226739323	58996	1.93943e-07	0.0431244	0.013	0.007	0.0401259	open
CM vs HM	4 - Mono	4a - CD14+ Mono	chr6-16765683-16766803	ENST00000606924	RP1-151F17.2	ENSG00000272341	lincRNA	exon	chr6-16764346-16766883	0	1.93967e-07	0.0570238	0.017	0.009	0.0401307	open
CM vs HM	4 - Mono	4a - CD14+ Mono	chr8-27614026-27615126	ENST00000523589	CLU	ENSG00000120885	protein_coding	utr	chr8-27614655-27614690	0	1.94124e-07	0.0566073	0.06	0.053	0.0401634	open
CM vs HM	4 - Mono	4a - CD14+ Mono	chr17-40319891-40320712	ENST00000577646	RARA	ENSG00000131759	protein_coding	gap	chr17-40309287-40326474	0	1.94608e-07	0.0359679	0.082	0.079	0.0402634	open
CM vs HM	4 - Mono	4a - CD14+ Mono	chr11-64873983-64874944	ENST00000621096	EHD1	ENSG00000110047	protein_coding	cds	chr11-64874421-64874518	0	1.94612e-07	0.0515853	0.012	0.004	0.0402642	open
CM vs HM	4 - Mono	4a - CD14+ Mono	chr22-41939703-41940728	ENST00000472374	CENPM	ENSG00000100162	protein_coding	cds	chr22-41940139-41940174	0	1.95181e-07	0.0416743	0.027	0.021	0.040382	open
CM vs HM	4 - Mono	4a - CD14+ Mono	chr4-53914050-53915161	ENST00000507166	RP11-231C18.3	ENSG00000282278	protein_coding	gap	chr4-53425966-54274924	0	1.95489e-07	0.0505053	0.117	0.111	0.0404457	open
CM vs HM	4 - Mono	4a - CD14+ Mono	chr17-75517957-75518911	ENST00000583818	TSEN54	ENSG00000182173	protein_coding	gap	chr17-75517656-75518994	0	1.9562e-07	0.0405548	0.018	0.012	0.0404729	open
CM vs HM	4 - Mono	4a - CD14+ Mono	chr15-85667702-85668676	ENST00000560676	AKAP13	ENSG00000170776	protein_coding	gap	chr15-85664756-85669721	0	1.97307e-07	0.0201632	0.072	0.074	0.0408218	open
CM vs HM	4 - Mono	4a - CD14+ Mono	chr16-46388390-46389283	ENST00000303383	SHCBP1	ENSG00000171241	protein_coding	utr	chr16-46580554-46581728	191270	1.97444e-07	0.092939	0.033	0.018	0.0408502	open
CM vs HM	4 - Mono	4a - CD14+ Mono	chr11-128627828-128629315	ENST00000531784	RP11-264E20.1	ENSG00000255465	lincRNA	exon	chr11-128621705-128621806	6021	2.00232e-07	0.0249822	0.007	0.003	0.0414269	open
CM vs HM	4 - Mono	4a - CD14+ Mono	chr4-94995501-94996676	ENST00000515059	BMPR1B	ENSG00000138696	protein_coding	utr	chr4-94996040-94996134	0	2.01704e-07	0.0466832	0.007	0.001	0.0417316	open
CM vs HM	4 - Mono	4a - CD14+ Mono	chr1-150577502-150578492	ENST00000620947	MCL1	ENSG00000143384	protein_coding	cds	chr1-150578244-150578491	0	2.02698e-07	0.0358626	0.044	0.039	0.0419372	open
CM vs HM	4 - Mono	4a - CD14+ Mono	chr2-173151357-173152403	ENST00000539448	AC013461.1	ENSG00000091436	protein_coding	gap	chr2-173091191-173169804	0	2.03964e-07	0.0573589	0.031	0.022	0.0421991	open
CM vs HM	4 - Mono	4a - CD14+ Mono	chr1-117660749-117661709	ENST00000369448	FAM46C	ENSG00000183508	protein_coding	utr	chr1-117624045-117628372	32376	2.04022e-07	0.00965863	0.009	0.008	0.0422111	open
CM vs HM	4 - Mono	4a - CD14+ Mono	chr19-16278841-16279872	ENST00000291439	AP1M1	ENSG00000072958	protein_coding	utr	chr19-16234436-16245907	32933	2.04785e-07	0.0858395	0.071	0.058	0.042369	open
CM vs HM	4 - Mono	4a - CD14+ Mono	chr14-99038045-99039034	ENST00000554025	RP11-1127D7.1	ENSG00000259119	lincRNA	exon	chr14-98927544-98927805	110239	2.06773e-07	0.0681039	0.052	0.041	0.0427803	open
CM vs HM	4 - Mono	4a - CD14+ Mono	chr1-155990824-155991800	ENST00000609126	ARHGEF2	ENSG00000116584	protein_coding	gap	chr1-155989352-155990840	0	2.07561e-07	0.0272459	0.063	0.059	0.0429433	open
CM vs HM	4 - Mono	4a - CD14+ Mono	chr3-188788237-188789321	ENST00000618621	LPP	ENSG00000145012	protein_coding	gap	chr3-188760283-188866199	0	2.07913e-07	0.0443664	0.063	0.054	0.0430162	open
CM vs HM	4 - Mono	4a - CD14+ Mono	chr3-195586392-195587535	ENST00000343267	APOD	ENSG00000189058	protein_coding	exon	chr3-195583878-195584205	2186	2.08006e-07	0.0581669	0.027	0.018	0.0430354	open
CM vs HM	4 - Mono	4a - CD14+ Mono	chr12-52066261-52067155	ENST00000547409	ATG101	ENSG00000123395	protein_coding	exon	chr12-52069246-52069942	2090	2.08646e-07	0.0618118	0.023	0.012	0.0431679	open
CM vs HM	4 - Mono	4a - CD14+ Mono	chr8-20865648-20866901	ENST00000523496	RP11-369E15.1	ENSG00000254260	lincRNA	exon	chr8-20941428-20941500	74526	2.09003e-07	0.0431853	0.008	0.002	0.0432417	open
CM vs HM	4 - Mono	4a - CD14+ Mono	chr5-95973608-95974598	ENST00000506070	AC008592.7	ENSG00000250955	lincRNA	gap	chr5-95970297-95980336	0	2.10703e-07	0.0275975	0.005	0.002	0.0435933	open
CM vs HM	4 - Mono	4a - CD14+ Mono	chr15-26891336-26892215	ENST00000557449	GABRA5	ENSG00000186297	protein_coding	gap	chr15-26880968-26914802	0	2.11399e-07	0.0516434	0.005	0	0.0437373	open
CM vs HM	4 - Mono	4a - CD14+ Mono	chr5-68121942-68123435	ENST00000520762	RP11-404L6.2	ENSG00000253787	lincRNA	exon	chr5-68189876-68189991	66440	2.14586e-07	0.0409785	0.005	0.001	0.0443968	open
CM vs HM	4 - Mono	4a - CD14+ Mono	chr12-124754747-124756067	ENST00000339570	SCARB1	ENSG00000073060	protein_coding	utr	chr12-124776856-124778466	20788	2.14681e-07	-0.245911	0.051	0.133	0.0444164	closed
CM vs HM	4 - Mono	4a - CD14+ Mono	chr1-225896859-225898626	ENST00000492457	LEFTY1	ENSG00000243709	protein_coding	gap	chr1-225888033-225911118	0	2.15328e-07	0.0343392	0.017	0.013	0.0445502	open
CM vs HM	4 - Mono	4a - CD14+ Mono	chr1-45802309-45803047	ENST00000470809	MAST2	ENSG00000086015	protein_coding	gap	chr1-45787133-45824432	0	2.16662e-07	0.0663359	0.075	0.064	0.0448262	open
CM vs HM	4 - Mono	4a - CD14+ Mono	chr19-2711346-2712062	ENST00000323469	DIRAS1	ENSG00000176490	protein_coding	utr	chr19-2714567-2717209	2504	2.18314e-07	0.054308	0.011	0.003	0.0451681	open
CM vs HM	4 - Mono	4a - CD14+ Mono	chr7-7923519-7924920	ENST00000482067	UMAD1	ENSG00000219545	protein_coding	gap	chr7-7801744-7967698	0	2.19014e-07	0.0294466	0.003	0	0.0453129	open
CM vs HM	4 - Mono	4a - CD14+ Mono	chr8-23540999-23542158	ENST00000523930	SLC25A37	ENSG00000147454	protein_coding	gap	chr8-23529213-23566107	0	2.19404e-07	0.0369247	0.113	0.112	0.0453937	open
CM vs HM	4 - Mono	4a - CD14+ Mono	chr7-1010997-1011990	ENST00000491163	C7orf50	ENSG00000146540	protein_coding	gap	chr7-1010144-1127256	0	2.19543e-07	0.0265941	0.008	0.004	0.0454224	open
CM vs HM	4 - Mono	4a - CD14+ Mono	chr4-52721955-52722973	ENST00000454756	ERVMER34-1	ENSG00000226887	protein_coding	gap	chr4-52722745-52750929	0	2.22098e-07	-0.23169	0.161	0.31	0.045951	closed
CM vs HM	4 - Mono	4a - CD14+ Mono	chr16-87407305-87408408	ENST00000568020	ZCCHC14	ENSG00000140948	protein_coding	utr	chr16-87407678-87410279	0	2.22721e-07	0.0588471	0.057	0.048	0.0460798	open
CM vs HM	4 - Mono	4a - CD14+ Mono	chr17-14351188-14352800	ENST00000360954	HS3ST3B1	ENSG00000125430	protein_coding	utr	chr17-14345647-14349404	1783	2.2373e-07	0.0252158	0.112	0.117	0.0462886	open
CM vs HM	4 - Mono	4a - CD14+ Mono	chr3-39152154-39154171	ENST00000273153	CSRNP1	ENSG00000144655	protein_coding	utr	chr3-39153438-39153575	0	2.25204e-07	0.0364281	0.312	0.351	0.0465935	open
CM vs HM	4 - Mono	4a - CD14+ Mono	chr18-77359929-77361088	ENST00000583629	RP11-176N18.2	ENSG00000264015	lincRNA	exon	chr18-77421619-77422024	60530	2.25433e-07	0.0266276	0.003	0	0.046641	open
CM vs HM	4 - Mono	4a - CD14+ Mono	chr14-105646141-105647123	ENST00000460164	RP11-731F5.2	ENSG00000253364	lincRNA	gap	chr14-105644790-105648325	0	2.2665e-07	0.0370581	0.004	0	0.0468929	open
CM vs HM	4 - Mono	4a - CD14+ Mono	chr3-119352999-119353956	ENST00000482743	ARHGAP31	ENSG00000031081	protein_coding	gap	chr3-119324959-119365315	0	2.28145e-07	0.0639373	0.067	0.056	0.0472021	open
CM vs HM	4 - Mono	4a - CD14+ Mono	chr13-30743855-30745032	ENST00000617770	ALOX5AP	ENSG00000132965	protein_coding	cds	chr13-30744060-30744159	0	2.28467e-07	0.0309558	0.101	0.104	0.0472687	open
CM vs HM	4 - Mono	4a - CD14+ Mono	chr12-10182210-10183340	ENST00000543484	TMEM52B	ENSG00000165685	protein_coding	cds	chr12-10182550-10182593	0	2.28552e-07	-0.00133274	0.092	0.101	0.0472862	closed
CM vs HM	4 - Mono	4a - CD14+ Mono	chr12-106454827-106455811	ENST00000539066	POLR3B	ENSG00000013503	protein_coding	gap	chr12-106454712-106457137	0	2.29138e-07	-0.216923	0.013	0.062	0.0474075	closed
CM vs HM	4 - Mono	4a - CD14+ Mono	chr3-71503904-71504976	ENST00000615603	FOXP1	ENSG00000114861	protein_coding	gap	chr3-71493556-71581548	0	2.29306e-07	0.0421847	0.032	0.024	0.0474423	open
CM vs HM	4 - Mono	4a - CD14+ Mono	chrX-70219835-70220928	ENST00000374521	AWAT1	ENSG00000204195	protein_coding	exon	chrX-70234655-70234771	13726	2.30437e-07	0.0347335	0.004	0	0.0476763	open
CM vs HM	4 - Mono	4a - CD14+ Mono	chr9-108478387-108479421	ENST00000415465	RP11-339N8.1	ENSG00000231678	lincRNA	exon	chr9-108701370-108701442	221948	2.33972e-07	0.0513466	0.018	0.01	0.0484077	open
CM vs HM	4 - Mono	4a - CD14+ Mono	chr15-66682667-66683677	ENST00000558797	LINC01169	ENSG00000259471	lincRNA	gap	chr15-66668455-66683998	0	2.34916e-07	0.0490999	0.012	0.004	0.048603	open
CM vs HM	4 - Mono	4a - CD14+ Mono	chr1-204452732-204453852	ENST00000424712	PIK3C2B	ENSG00000133056	protein_coding	gap	chr1-204450018-204454668	0	2.35499e-07	0.0443358	0.011	0.005	0.0487235	open
CM vs HM	4 - Mono	4a - CD14+ Mono	chr2-117980622-117981755	ENST00000460781	CCDC93	ENSG00000125633	protein_coding	gap	chr2-117978031-117985968	0	2.40366e-07	0.0275856	0.081	0.079	0.0497304	open
CM vs HM	4 - Mono	4a - CD14+ Mono	chr5-14925651-14926643	ENST00000607026	CTB-40H15.4	ENSG00000272057	lincRNA	exon	chr5-14872332-14872713	52937	2.40865e-07	0.0509001	0.02	0.012	0.0498338	open
CM vs HM	4 - Mono	4b - Int Mono	chr6-111759547-111760528	ENST00000517419	FYN	ENSG00000010810	protein_coding	utr	chr6-111759845-111759917	0	3.40996e-08	0.550045	0.12	0.008	0.00705503	open
CM vs HM	4 - Mono	4b - Int Mono	chr22-18528382-18529603	ENST00000613577	TMEM191B	ENSG00000278558	protein_coding	cds	chr22-18529441-18529497	0	1.10234e-07	0.577399	0.267	0.039	0.0228068	open
CM vs HM	4 - Mono	4c - CD16+ Mono	chr3-131361062-131362454	ENST00000513905	RP11-933H2.4	ENSG00000250608	processed_transcript	gap	chr3-131330868-131361565	0	3.44617e-08	0.59655	0.417	0.173	0.00712995	open
CM vs HM	4 - Mono	4c - CD16+ Mono	chr22-18528382-18529603	ENST00000613577	TMEM191B	ENSG00000278558	protein_coding	cds	chr22-18529441-18529497	0	4.71268e-08	0.546036	0.271	0.081	0.0097503	open
CM vs HM	4 - Mono	4c - CD16+ Mono	chr1-115654862-115655864	ENST00000369510	VANGL1	ENSG00000173218	protein_coding	gap	chr1-115651485-115659640	0	1.54019e-07	0.257065	0.042	0	0.0318657	open
CM vs HM	5 - B cells	/	chr22-18528382-18529603	ENST00000613577	TMEM191B	ENSG00000278558	protein_coding	cds	chr22-18529441-18529497	0	1.80475e-24	0.300622	0.235	0.128	3.73395e-19	open
CM vs HM	5 - B cells	/	chr1-166988742-166989637	ENST00000447624	MAEL	ENSG00000143194	protein_coding	cds	chr1-166989353-166989484	0	2.55195e-17	-0.315886	0	0.045	5.27986e-12	closed
CM vs HM	5 - B cells	/	chr17-67574453-67575461	ENST00000584554	PITPNC1	ENSG00000154217	protein_coding	gap	chr17-67553618-67578185	0	4.13263e-17	-0.412377	0.013	0.091	8.5502e-12	closed
CM vs HM	5 - B cells	/	chr2-9409908-9410891	ENST00000497031	ITGB1BP1	ENSG00000119185	protein_coding	gap	chr2-9408206-9412268	0	7.76492e-17	0.154807	0.023	0	1.60652e-11	open
CM vs HM	5 - B cells	/	chr19-872465-873779	ENST00000607471	MED16	ENSG00000175221	protein_coding	cds	chr19-873449-873582	0	3.49122e-16	-0.391075	0.059	0.184	7.22316e-11	closed
CM vs HM	5 - B cells	/	chr2-113234994-113236052	ENST00000465084	PAX8	ENSG00000125618	protein_coding	cds	chr2-113235394-113235443	0	4.8534e-16	0.230533	0.064	0.015	1.00414e-10	open
CM vs HM	5 - B cells	/	chr16-4364683-4365968	ENST00000575334	CORO7-PAM16	ENSG00000103426	protein_coding	cds	chr16-4365491-4365545	0	6.13863e-16	-0.434726	0.056	0.17	1.27005e-10	closed
CM vs HM	5 - B cells	/	chr19-35712591-35713879	ENST00000481182	ZBTB32	ENSG00000011590	protein_coding	utr	chr19-35713433-35713454	0	6.90682e-16	-0.435089	0.036	0.139	1.42899e-10	closed
CM vs HM	5 - B cells	/	chr4-9152476-9153480	ENST00000512047	FAM90A26	ENSG00000229924	protein_coding	exon	chr4-9170409-9170522	16928	8.91217e-16	0.219989	0.444	0.36	1.84388e-10	open
CM vs HM	5 - B cells	/	chr18-76990533-76991588	ENST00000483025	MBP	ENSG00000197971	protein_coding	cds	chr18-76990891-76990914	0	1.41226e-15	0.25616	0.077	0.025	2.9219e-10	open
CM vs HM	5 - B cells	/	chr4-140151678-140152668	ENST00000509479	MAML3	ENSG00000196782	protein_coding	gap	chr4-139890968-140152859	0	2.614e-15	0.204801	0.159	0.089	5.40823e-10	open
CM vs HM	5 - B cells	/	chr9-39809189-39810297	ENST00000627065	GLIDR	ENSG00000278175	lincRNA	gap	chr9-39809616-39809730	0	3.59376e-15	-0.321023	0.029	0.127	7.43532e-10	closed
CM vs HM	5 - B cells	/	chr13-42377264-42378440	ENST00000637462	RP11-413N19.2	ENSG00000283554	lincRNA	gap	chr13-42342603-42384256	0	3.76173e-15	-0.32418	0.168	0.343	7.78283e-10	closed
CM vs HM	5 - B cells	/	chr2-68120792-68121847	ENST00000492039	WDR92	ENSG00000243667	protein_coding	exon	chr2-68122936-68123011	1088	7.90012e-15	-0.37538	0.049	0.157	1.6345e-09	closed
CM vs HM	5 - B cells	/	chr7-29288600-29290127	ENST00000539406	CHN2	ENSG00000106069	protein_coding	gap	chr7-29194991-29354624	0	8.3186e-15	-0.285506	0.009	0.068	1.72108e-09	closed
CM vs HM	5 - B cells	/	chr2-240621226-240622251	ENST00000430267	GPR35	ENSG00000178623	protein_coding	gap	chr2-240619032-240629948	0	8.57457e-15	-0.316457	0.03	0.116	1.77404e-09	closed
CM vs HM	5 - B cells	/	chr2-25421793-25422769	ENST00000496972	DTNB	ENSG00000138101	protein_coding	gap	chr2-25388362-25427534	0	9.43802e-15	-0.382156	0.039	0.137	1.95268e-09	closed
CM vs HM	5 - B cells	/	chr13-113445369-113446835	ENST00000612156	ADPRHL1	ENSG00000153531	protein_coding	gap	chr13-113444590-113453223	0	1.34018e-14	-0.284903	0.03	0.118	2.77276e-09	closed
CM vs HM	5 - B cells	/	chr2-223881619-223882555	ENST00000233055	WDFY1	ENSG00000085449	protein_coding	cds	chr2-223881942-223882072	0	1.3488e-14	-0.388477	0.019	0.09	2.79059e-09	closed
CM vs HM	5 - B cells	/	chr2-96838948-96840071	ENST00000418232	ANKRD23	ENSG00000163126	protein_coding	cds	chr2-96839997-96840095	0	1.95377e-14	-0.328205	0.101	0.237	4.04226e-09	closed
CM vs HM	5 - B cells	/	chr15-70196416-70197430	ENST00000561310	AC011648.1	ENSG00000259252	lincRNA	gap	chr15-70197081-70198318	0	3.01493e-14	-0.426091	0.068	0.185	6.23774e-09	closed
CM vs HM	5 - B cells	/	chr19-49390615-49392774	ENST00000597993	CCDC155	ENSG00000161609	protein_coding	cds	chr19-49391686-49391771	0	3.26846e-14	-0.295278	0.068	0.184	6.76229e-09	closed
CM vs HM	5 - B cells	/	chr9-37531388-37532634	ENST00000432825	FBXO10	ENSG00000147912	protein_coding	cds	chr9-37531909-37532058	0	3.63814e-14	-0.420956	0.047	0.148	7.52713e-09	closed
CM vs HM	5 - B cells	/	chr2-174752170-174753917	ENST00000636168	CHRNA1	ENSG00000138435	protein_coding	cds	chr2-174753503-174753740	0	6.01857e-14	-0.398303	0.07	0.189	1.24521e-08	closed
CM vs HM	5 - B cells	/	chr4-2745889-2746912	ENST00000510267	TNIP2	ENSG00000168884	protein_coding	gap	chr4-2745536-2747654	0	6.68026e-14	-0.338454	0.11	0.245	1.38211e-08	closed
CM vs HM	5 - B cells	/	chr1-205822990-205823933	ENST00000367136	PM20D1	ENSG00000162877	protein_coding	utr	chr1-205828022-205828619	4088	7.95989e-14	-0.249348	0.003	0.049	1.64686e-08	closed
CM vs HM	5 - B cells	/	chr13-52920820-52921905	ENST00000338862	PCDH8	ENSG00000136099	protein_coding	exon	chr13-52846097-52848641	72178	1.34448e-13	-0.385323	0.036	0.125	2.78166e-08	closed
CM vs HM	5 - B cells	/	chr10-103470861-103471887	ENST00000369783	CALHM3	ENSG00000183128	protein_coding	utr	chr10-103472804-103473212	916	1.60106e-13	-0.360582	0.074	0.197	3.31251e-08	closed
CM vs HM	5 - B cells	/	GL000219.1-99223-100168	NA	NA	NA	NA	NA	NA	NA	1.63963e-13	0.187463	0.347	0.293	3.39231e-08	open
CM vs HM	5 - B cells	/	chr11-116342913-116343969	ENST00000452629	AP001891.1	ENSG00000236437	lincRNA	exon	chr11-116496899-116497730	152929	1.92137e-13	-0.356328	0.022	0.093	3.97523e-08	closed
CM vs HM	5 - B cells	/	chr6-16419412-16420311	ENST00000436367	ATXN1	ENSG00000124788	protein_coding	gap	chr6-16328471-16485971	0	2.62805e-13	-0.362484	0.023	0.095	5.4373e-08	closed
CM vs HM	5 - B cells	/	chr20-57708474-57709213	ENST00000472841	PMEPA1	ENSG00000124225	protein_coding	gap	chr20-57659698-57711323	0	9.07584e-13	0.158516	0.063	0.026	1.87775e-07	open
CM vs HM	5 - B cells	/	chr6-16420619-16421674	ENST00000436367	ATXN1	ENSG00000124788	protein_coding	gap	chr6-16328471-16485971	0	1.07665e-12	-0.401436	0.069	0.187	2.22754e-07	closed
CM vs HM	5 - B cells	/	chr10-30751568-30752544	ENST00000416310	RP11-14C22.6	ENSG00000230720	lincRNA	exon	chr10-30723419-30723740	27827	1.80855e-12	0.141331	0.024	0.001	3.7418e-07	open
CM vs HM	5 - B cells	/	chr10-26738954-26739943	ENST00000491711	PDSS1	ENSG00000148459	protein_coding	gap	chr10-26735580-26740644	0	2.55208e-12	-0.331323	0.031	0.105	5.28012e-07	closed
CM vs HM	5 - B cells	/	chr20-38091295-38092380	ENST00000373433	RPRD1B	ENSG00000101413	protein_coding	utr	chr20-38089876-38092366	0	3.94799e-12	-0.314648	0.015	0.074	8.1682e-07	closed
CM vs HM	5 - B cells	/	chr6-16305067-16306133	ENST00000436367	ATXN1	ENSG00000124788	protein_coding	utr	chr6-16299112-16306328	0	4.62539e-12	-0.277013	0.037	0.122	9.5697e-07	closed
CM vs HM	5 - B cells	/	chr21-43352348-43353398	ENST00000442815	TCONS_00029157	ENSG00000237989	lincRNA	exon	chr21-43358147-43359486	4748	5.40547e-12	-0.382094	0.094	0.219	1.11836e-06	closed
CM vs HM	5 - B cells	/	chr17-14300406-14301430	ENST00000466596	HS3ST3B1	ENSG00000125430	protein_coding	utr	chr17-14301083-14301518	0	5.49385e-12	0.171741	0.274	0.223	1.13665e-06	open
CM vs HM	5 - B cells	/	chr10-116847759-116848751	ENST00000635765	HSPA12A	ENSG00000165868	protein_coding	gap	chr10-116835023-116849565	0	5.72394e-12	-0.354107	0.043	0.127	1.18425e-06	closed
CM vs HM	5 - B cells	/	chr2-20676740-20677869	ENST00000272224	GDF7	ENSG00000143869	protein_coding	utr	chr2-20671426-20679245	0	5.83771e-12	-0.366837	0.053	0.155	1.20779e-06	closed
CM vs HM	5 - B cells	/	chr7-4204527-4205444	ENST00000615806	SDK1	ENSG00000146555	protein_coding	gap	chr7-4178587-4205878	0	7.15218e-12	0.0968092	0.013	0	1.47975e-06	open
CM vs HM	5 - B cells	/	chr9-130358157-130359037	ENST00000624552	HMCN2	ENSG00000148357	protein_coding	cds	chr9-130358390-130358486	0	7.44264e-12	-0.303055	0.008	0.056	1.53984e-06	closed
CM vs HM	5 - B cells	/	chr5-1502976-1504210	ENST00000514484	LPCAT1	ENSG00000153395	protein_coding	gap	chr5-1501604-1521346	0	1.27054e-11	-0.313311	0.075	0.182	2.62869e-06	closed
CM vs HM	5 - B cells	/	chr3-177246653-177247860	ENST00000635794	TBL1XR1	ENSG00000177565	protein_coding	exon	chr3-177227868-177228000	18652	1.38204e-11	-0.313629	0.022	0.088	2.85938e-06	closed
CM vs HM	5 - B cells	/	chr1-226779266-226780231	ENST00000366784	ITPKB	ENSG00000143772	protein_coding	exon	chr1-226739041-226739323	39942	1.49044e-11	-0.230235	0.001	0.03	3.08364e-06	closed
CM vs HM	5 - B cells	/	chr8-19013315-19014443	ENST00000440756	PSD3	ENSG00000156011	protein_coding	cds	chr8-19013563-19013583	0	1.51953e-11	0.174503	0.134	0.079	3.14382e-06	open
CM vs HM	5 - B cells	/	chr22-38260012-38261257	ENST00000466117	TMEM184B	ENSG00000198792	protein_coding	gap	chr22-38248020-38272883	0	1.60487e-11	-0.394859	0.049	0.147	3.32039e-06	closed
CM vs HM	5 - B cells	/	chr2-16712683-16713717	ENST00000423925	AC008069.1	ENSG00000223536	lincRNA	exon	chr2-16728124-16728179	14406	1.63478e-11	-0.336275	0.038	0.122	3.38227e-06	closed
CM vs HM	5 - B cells	/	chr4-140150418-140151410	ENST00000509479	MAML3	ENSG00000196782	protein_coding	gap	chr4-139890968-140152859	0	1.76317e-11	0.15325	0.141	0.092	3.64792e-06	open
CM vs HM	5 - B cells	/	chr1-236156177-236157512	ENST00000419162	GPR137B	ENSG00000077585	protein_coding	gap	chr1-236143037-236178413	0	1.82516e-11	-0.314367	0.046	0.14	3.77616e-06	closed
CM vs HM	5 - B cells	/	chr1-220219675-220220552	ENST00000478976	RAB3GAP2	ENSG00000118873	protein_coding	gap	chr1-220190426-220271156	0	1.9048e-11	-0.320862	0.02	0.081	3.94093e-06	closed
CM vs HM	5 - B cells	/	chr17-3558307-3559286	ENST00000576742	TRPV3	ENSG00000167723	protein_coding	exon	chr17-3557676-3557995	311	2.90605e-11	-0.327541	0.052	0.142	6.01246e-06	closed
CM vs HM	5 - B cells	/	chr1-9162375-9163361	ENST00000635687	MIR34A	ENSG00000228526	lincRNA	gap	chr1-9151836-9182006	0	3.03936e-11	-0.294595	0.007	0.055	6.28828e-06	closed
CM vs HM	5 - B cells	/	chr17-59837312-59838323	ENST00000591877	VMP1	ENSG00000062716	protein_coding	cds	chr17-59838295-59838397	0	3.96102e-11	-0.343952	0.06	0.164	8.19516e-06	closed
CM vs HM	5 - B cells	/	chr1-159076539-159077742	ENST00000368130	AIM2	ENSG00000163568	protein_coding	utr	chr1-159076633-159076901	0	4.45928e-11	-0.383585	0.106	0.238	9.22603e-06	closed
CM vs HM	5 - B cells	/	chrX-119755796-119756787	ENST00000343905	SOWAHD	ENSG00000187808	protein_coding	exon	chrX-119758613-119760164	1825	4.75119e-11	-0.312881	0.031	0.106	9.82998e-06	closed
CM vs HM	5 - B cells	/	chr17-41308177-41309185	ENST00000391352	KRTAP16-1	ENSG00000212657	protein_coding	cds	chr17-41307700-41309253	0	5.06206e-11	0.152322	0.252	0.202	1.04731e-05	open
CM vs HM	5 - B cells	/	chr1-175598752-175599897	ENST00000367674	TNR	ENSG00000116147	protein_coding	gap	chr1-175528370-175743225	0	5.67329e-11	-0.32158	0.065	0.162	1.17377e-05	closed
CM vs HM	5 - B cells	/	chr1-13713150-13714128	ENST00000484063	PRDM2	ENSG00000116731	protein_coding	gap	chr1-13700301-13715540	0	5.85859e-11	-0.328263	0.036	0.114	1.21211e-05	closed
CM vs HM	5 - B cells	/	chr15-42457310-42458437	ENST00000565948	ZNF106	ENSG00000103994	protein_coding	utr	chr15-42457217-42457556	0	6.13706e-11	-0.224339	0.009	0.063	1.26973e-05	closed
CM vs HM	5 - B cells	/	chr7-38348946-38350474	ENST00000609522	RP11-121A8.1	ENSG00000272908	lincRNA	exon	chr7-38329240-38329643	19302	6.32255e-11	-0.2426	0.016	0.071	1.3081e-05	closed
CM vs HM	5 - B cells	/	chr11-44600719-44601954	ENST00000532544	CD82	ENSG00000085117	protein_coding	gap	chr11-44600231-44605057	0	6.39599e-11	-0.286246	0.077	0.179	1.3233e-05	closed
CM vs HM	5 - B cells	/	chr5-180313412-180314453	ENST00000253778	GFPT2	ENSG00000131459	protein_coding	cds	chr5-180313807-180313964	0	7.90348e-11	-0.259499	0.013	0.072	1.63519e-05	closed
CM vs HM	5 - B cells	/	chr11-69055729-69056753	ENST00000637504	TPCN2	ENSG00000162341	protein_coding	gap	chr11-69055353-69057577	0	8.80847e-11	-0.283276	0.169	0.313	1.82243e-05	closed
CM vs HM	5 - B cells	/	chr3-119562144-119563249	ENST00000264246	CD80	ENSG00000121594	protein_coding	exon	chr3-119559440-119559602	2541	1.02389e-10	-0.323935	0.119	0.245	2.11838e-05	closed
CM vs HM	5 - B cells	/	chr5-156402131-156403247	ENST00000524347	SGCD	ENSG00000170624	protein_coding	gap	chr5-156393866-156508600	0	1.06477e-10	-0.357674	0.095	0.213	2.20296e-05	closed
CM vs HM	5 - B cells	/	chr7-98930515-98931806	ENST00000628380	TRRAP	ENSG00000196367	protein_coding	cds	chr7-98931405-98931665	0	1.12697e-10	-0.329615	0.022	0.083	2.33165e-05	closed
CM vs HM	5 - B cells	/	chr3-184755907-184756934	ENST00000457449	RP11-329B9.1	ENSG00000229433	lincRNA	exon	chr3-184756389-184758653	0	1.19229e-10	-0.241587	0.016	0.076	2.46679e-05	closed
CM vs HM	5 - B cells	/	chr9-133238226-133239665	ENST00000453660	ABO	ENSG00000175164	protein_coding	exon	chr9-133250401-133256356	10735	1.39387e-10	0.166957	0.055	0.021	2.88384e-05	open
CM vs HM	5 - B cells	/	chr2-174750705-174751660	ENST00000636168	CHRNA1	ENSG00000138435	protein_coding	gap	chr2-174750170-174753502	0	1.41482e-10	-0.288835	0.044	0.124	2.92719e-05	closed
CM vs HM	5 - B cells	/	chr4-140807569-140808580	ENST00000609937	RP11-102N12.3	ENSG00000273472	lincRNA	exon	chr4-140756528-140757921	49647	1.62988e-10	-0.267687	0.074	0.177	3.37213e-05	closed
CM vs HM	5 - B cells	/	chr1-36400540-36402256	ENST00000315732	LSM10	ENSG00000181817	protein_coding	exon	chr1-36397767-36397892	2647	1.76291e-10	-0.368096	0.031	0.114	3.64738e-05	closed
CM vs HM	5 - B cells	/	chr16-84593892-84594905	ENST00000564662	COTL1	ENSG00000103187	protein_coding	gap	chr16-84590263-84617500	0	2.13611e-10	-0.314653	0.12	0.244	4.4195e-05	closed
CM vs HM	5 - B cells	/	chr4-150827909-150828996	ENST00000510413	LRBA	ENSG00000198589	protein_coding	cds	chr4-150828180-150828621	0	2.30397e-10	-0.355675	0.04	0.123	4.7668e-05	closed
CM vs HM	5 - B cells	/	chr20-35539480-35540479	ENST00000348547	ERGIC3	ENSG00000125991	protein_coding	exon	chr20-35542021-35542185	1541	2.40374e-10	-0.230223	0.023	0.083	4.97322e-05	closed
CM vs HM	5 - B cells	/	chr7-55086262-55087273	ENST00000463948	EGFR	ENSG00000146648	protein_coding	gap	chr7-55019366-55119055	0	2.55352e-10	-0.21506	0.005	0.039	5.28311e-05	closed
CM vs HM	5 - B cells	/	chr5-1498670-1499632	ENST00000514484	LPCAT1	ENSG00000153395	protein_coding	gap	chr5-1494915-1501460	0	3.06206e-10	-0.293015	0.027	0.096	6.33525e-05	closed
CM vs HM	5 - B cells	/	chr4-25878353-25879318	ENST00000515764	SMIM20	ENSG00000250317	protein_coding	gap	chr4-25862154-25928312	0	3.46429e-10	-0.328197	0.045	0.127	7.16744e-05	closed
CM vs HM	5 - B cells	/	chr22-24400674-24401743	ENST00000541492	SPECC1L	ENSG00000100014	protein_coding	gap	chr22-24369321-24412647	0	3.61956e-10	-0.341664	0.029	0.105	7.48868e-05	closed
CM vs HM	5 - B cells	/	chr13-73967456-73968517	ENST00000472022	KLF12	ENSG00000118922	protein_coding	gap	chr13-73944071-73994989	0	4.84203e-10	-0.28122	0.075	0.174	0.000100179	closed
CM vs HM	5 - B cells	/	chr3-183535844-183536834	ENST00000489245	KLHL6	ENSG00000172578	protein_coding	gap	chr3-183528011-183555360	0	4.94419e-10	-0.30996	0.026	0.09	0.000102293	closed
CM vs HM	5 - B cells	/	chr2-121699106-121700173	ENST00000285814	NIFK	ENSG00000155438	protein_coding	utr	chr2-121726945-121727723	26771	6.08623e-10	0.11969	0.067	0.039	0.000125921	open
CM vs HM	5 - B cells	/	chr1-228457249-228458393	ENST00000620438	HIST3H2BB	ENSG00000196890	protein_coding	cds	chr1-228458130-228458510	0	6.23022e-10	-0.369852	0.117	0.25	0.0001289	closed
CM vs HM	5 - B cells	/	chr12-2248726-2249700	ENST00000480911	CACNA1C	ENSG00000151067	protein_coding	gap	chr12-2120431-2448975	0	6.90443e-10	-0.291373	0.022	0.079	0.000142849	closed
CM vs HM	5 - B cells	/	chr2-96343648-96344694	ENST00000455200	NCAPH	ENSG00000121152	protein_coding	cds	chr2-96344105-96344229	0	7.16961e-10	-0.321483	0.025	0.092	0.000148336	closed
CM vs HM	5 - B cells	/	chr7-35253533-35254738	ENST00000408931	TBX20	ENSG00000164532	protein_coding	cds	chr7-35253494-35253620	0	7.26493e-10	0.162067	0.045	0.014	0.000150308	open
CM vs HM	5 - B cells	/	chr12-120132539-120133575	ENST00000300648	GCN1	ENSG00000089154	protein_coding	gap	chr12-120132023-120134290	0	7.49138e-10	-0.290556	0.046	0.123	0.000154993	closed
CM vs HM	5 - B cells	/	chr12-112998713-112999752	ENST00000620097	OAS2	ENSG00000111335	protein_coding	gap	chr12-112998411-113002931	0	7.95968e-10	-0.271639	0.044	0.126	0.000164682	closed
CM vs HM	5 - B cells	/	chr8-127977515-127978475	ENST00000519481	PVT1	ENSG00000249859	lincRNA	gap	chr8-127890999-127989161	0	8.02563e-10	-0.277225	0.032	0.103	0.000166046	closed
CM vs HM	5 - B cells	/	chr19-23682706-23683659	ENST00000601935	ZNF675	ENSG00000197372	protein_coding	gap	chr19-23663159-23687030	0	8.2797e-10	0.119609	0.015	0	0.000171303	open
CM vs HM	5 - B cells	/	chr16-69371224-69372271	ENST00000569584	TERF2	ENSG00000132604	protein_coding	cds	chr16-69372269-69372282	0	8.47998e-10	-0.277411	0.028	0.094	0.000175447	closed
CM vs HM	5 - B cells	/	chr4-40515059-40516176	ENST00000381795	RBM47	ENSG00000163694	protein_coding	utr	chr4-40515867-40515973	0	8.89902e-10	-0.297457	0.068	0.16	0.000184116	closed
CM vs HM	5 - B cells	/	chr1-167429790-167431453	ENST00000392122	CD247	ENSG00000198821	protein_coding	utr	chr1-167430640-167431680	0	1.00993e-09	-0.30206	0.037	0.109	0.00020895	closed
CM vs HM	5 - B cells	/	chr8-23420952-23422098	ENST00000524144	LOXL2	ENSG00000134013	protein_coding	gap	chr8-23404074-23425050	0	1.03321e-09	-0.306061	0.04	0.114	0.000213766	closed
CM vs HM	5 - B cells	/	chr12-3962248-3963409	ENST00000543206	RP11-320N7.2	ENSG00000256969	lincRNA	exon	chr12-4020977-4021081	57567	1.06356e-09	0.119696	0.055	0.023	0.000220045	open
CM vs HM	5 - B cells	/	chr17-40095669-40097010	ENST00000246672	NR1D1	ENSG00000126368	protein_coding	cds	chr17-40096691-40096779	0	1.09106e-09	-0.283868	0.143	0.274	0.000225734	closed
CM vs HM	5 - B cells	/	chr1-11335049-11336218	ENST00000483738	UBIAD1	ENSG00000120942	protein_coding	utr	chr1-11294891-11296049	38999	1.09418e-09	-0.25403	0.019	0.075	0.00022638	closed
CM vs HM	5 - B cells	/	chr7-141649394-141650588	ENST00000629555	AGK	ENSG00000006530	protein_coding	gap	chr7-141649334-141651524	0	1.40926e-09	-0.352095	0.046	0.135	0.000291569	closed
CM vs HM	5 - B cells	/	chr14-77371969-77372983	ENST00000216468	TMED8	ENSG00000100580	protein_coding	gap	chr14-77351752-77376935	0	1.43885e-09	-0.253794	0.029	0.09	0.000297691	closed
CM vs HM	5 - B cells	/	chr22-41883521-41884677	ENST00000612482	SREBF2	ENSG00000198911	protein_coding	gap	chr22-41880993-41884841	0	1.53629e-09	-0.341249	0.053	0.144	0.000317851	closed
CM vs HM	5 - B cells	/	chr14-95725553-95726552	ENST00000402399	TCL1A	ENSG00000100721	protein_coding	exon	chr14-95713947-95714196	11356	1.57405e-09	0.160208	0.081	0.038	0.000325664	open
CM vs HM	5 - B cells	/	chr13-49619779-49620805	ENST00000282026	ARL11	ENSG00000152213	protein_coding	exon	chr13-49628299-49628615	7493	1.63835e-09	0.173956	0.034	0.006	0.000338966	open
CM vs HM	5 - B cells	/	chr8-8227498-8228922	ENST00000594215	RP11-556O5.6	ENSG00000268955	lincRNA	exon	chr8-8188535-8189195	38302	1.65452e-09	-0.19309	0.212	0.385	0.000342312	closed
CM vs HM	5 - B cells	/	chr4-73589034-73590922	ENST00000395777	RASSF6	ENSG00000169435	protein_coding	gap	chr4-73587935-73593450	0	1.6854e-09	-0.245034	0.021	0.078	0.0003487	closed
CM vs HM	5 - B cells	/	chr2-68792511-68793432	ENST00000497079	ARHGAP25	ENSG00000163219	protein_coding	gap	chr2-68787957-68807272	0	1.71736e-09	-0.274616	0.017	0.074	0.000355314	closed
CM vs HM	5 - B cells	/	chr7-38357905-38359754	ENST00000356264	AMPH	ENSG00000078053	protein_coding	utr	chr7-38383704-38384817	23949	1.84361e-09	-0.259837	0.04	0.12	0.000381435	closed
CM vs HM	5 - B cells	/	chr19-4214264-4215432	ENST00000600132	ANKRD24	ENSG00000089847	protein_coding	gap	chr19-4212699-4215977	0	1.88878e-09	-0.277309	0.014	0.059	0.00039078	closed
CM vs HM	5 - B cells	/	chr12-10394153-10396068	ENST00000591937	KLRC4-KLRK1	ENSG00000255819	protein_coding	gap	chr12-10391892-10405849	0	1.91467e-09	0.152392	0.141	0.093	0.000396136	open
CM vs HM	5 - B cells	/	chr3-53554804-53555579	ENST00000637424	CACNA1D	ENSG00000157388	protein_coding	gap	chr3-53501721-53650778	0	2.07782e-09	-0.271487	0.01	0.054	0.000429891	closed
CM vs HM	5 - B cells	/	chr16-8891211-8892293	ENST00000344836	USP7	ENSG00000187555	protein_coding	utr	chr16-8892094-8893997	0	2.19571e-09	-0.292129	0.187	0.328	0.000454281	closed
CM vs HM	5 - B cells	/	chr19-53867010-53868141	ENST00000448420	MYADM	ENSG00000179820	protein_coding	utr	chr19-53867883-53867943	0	2.39436e-09	0.14925	0.427	0.389	0.000495381	open
CM vs HM	5 - B cells	/	chr18-38940598-38941685	ENST00000598549	RP11-687D19.1	ENSG00000268566	lincRNA	exon	chr18-38687933-38687998	252599	2.52483e-09	-0.33974	0.044	0.124	0.000522374	closed
CM vs HM	5 - B cells	/	chr17-16987435-16988818	ENST00000419151	AC104024.2	ENSG00000230969	lincRNA	gap	chr17-16988524-16988914	0	2.53749e-09	-0.241365	0.179	0.322	0.000524994	closed
CM vs HM	5 - B cells	/	chr5-35319281-35320343	ENST00000618457	PRLR	ENSG00000113494	protein_coding	exon	chr5-35230268-35230589	88691	2.68197e-09	-0.236207	0.024	0.089	0.000554887	closed
CM vs HM	5 - B cells	/	chr16-84507136-84508119	ENST00000565079	TLDC1	ENSG00000140950	protein_coding	gap	chr16-84498112-84553945	0	2.72135e-09	-0.233717	0.016	0.066	0.000563034	closed
CM vs HM	5 - B cells	/	chr20-43750890-43753308	ENST00000373003	GTSF1L	ENSG00000124196	protein_coding	exon	chr20-43726164-43726998	23891	2.82878e-09	-0.295597	0.02	0.083	0.00058526	closed
CM vs HM	5 - B cells	/	chr3-133619762-133620848	ENST00000260810	TOPBP1	ENSG00000163781	protein_coding	cds	chr3-133620155-133620347	0	2.86212e-09	-0.278225	0.044	0.117	0.000592158	closed
CM vs HM	5 - B cells	/	chr1-9425921-9427006	ENST00000517147	RNA5SP40	ENSG00000252956	rRNA	exon	chr1-9437669-9437778	10662	3.08182e-09	0.125744	0.273	0.232	0.000637614	open
CM vs HM	5 - B cells	/	chr7-2258713-2259881	ENST00000479689	SNX8	ENSG00000106266	protein_coding	gap	chr7-2257804-2263229	0	3.13505e-09	-0.325537	0.046	0.123	0.000648626	closed
CM vs HM	5 - B cells	/	chr22-39464921-39465987	ENST00000341184	MGAT3	ENSG00000128268	protein_coding	gap	chr22-39457558-39487346	0	3.2213e-09	-0.279198	0.035	0.105	0.000666471	closed
CM vs HM	5 - B cells	/	chr11-100910490-100911599	ENST00000534060	ARHGAP42	ENSG00000165895	protein_coding	gap	chr11-100859626-100913451	0	3.30869e-09	-0.18131	0.003	0.034	0.000684552	closed
CM vs HM	5 - B cells	/	chr11-75503261-75504237	ENST00000532435	GDPD5	ENSG00000158555	protein_coding	gap	chr11-75490321-75525209	0	3.80018e-09	-0.275836	0.013	0.062	0.000786239	closed
CM vs HM	5 - B cells	/	chr3-59261734-59262956	ENST00000497258	RP11-285B24.1	ENSG00000243903	lincRNA	exon	chr3-59380024-59380583	117067	3.80195e-09	-0.228036	0.015	0.067	0.000786604	closed
CM vs HM	5 - B cells	/	chr16-77190410-77191385	ENST00000545553	MON1B	ENSG00000103111	protein_coding	cds	chr16-77191222-77191258	0	4.11779e-09	0.112139	0.472	0.48	0.000851951	open
CM vs HM	5 - B cells	/	chr9-137737866-137738880	ENST00000638071	EHMT1	ENSG00000181090	protein_coding	gap	chr9-137728530-137743370	0	4.14223e-09	-0.29418	0.102	0.217	0.000857006	closed
CM vs HM	5 - B cells	/	chr10-62018461-62019384	ENST00000279873	ARID5B	ENSG00000150347	protein_coding	gap	chr10-62000322-62050887	0	4.18169e-09	-0.256823	0.015	0.062	0.000865171	closed
CM vs HM	5 - B cells	/	chr6-52497369-52498301	ENST00000182527	TRAM2	ENSG00000065308	protein_coding	utr	chr6-52497402-52503196	0	4.20541e-09	-0.338051	0.081	0.187	0.000870079	closed
CM vs HM	5 - B cells	/	chr19-45455667-45456721	ENST00000423698	ERCC1	ENSG00000012061	protein_coding	gap	chr19-45423382-45478735	0	4.32868e-09	0.118795	0.103	0.071	0.000895582	open
CM vs HM	5 - B cells	/	chr6-12065207-12066368	ENST00000627968	HIVEP1	ENSG00000095951	protein_coding	gap	chr6-12015669-12089183	0	4.58203e-09	-0.306755	0.028	0.092	0.000947999	closed
CM vs HM	5 - B cells	/	chr20-43941351-43942475	ENST00000423191	TOX2	ENSG00000124191	protein_coding	gap	chr20-43916209-43973366	0	4.70671e-09	-0.211717	0.005	0.043	0.000973795	closed
CM vs HM	5 - B cells	/	chr18-67516415-67517338	ENST00000310045	DSEL	ENSG00000171451	protein_coding	utr	chr18-67516361-67516980	0	4.81232e-09	0.157838	0.342	0.296	0.000995646	open
CM vs HM	5 - B cells	/	chr12-112926122-112927080	ENST00000552526	OAS1	ENSG00000089127	protein_coding	gap	chr12-112919433-112931877	0	4.83716e-09	-0.217501	0.013	0.058	0.00100078	closed
CM vs HM	5 - B cells	/	chr16-56857837-56859047	ENST00000438926	SLC12A3	ENSG00000070915	protein_coding	exon	chr16-56865207-56865517	6159	5.82706e-09	0.0933387	0.015	0.001	0.00120559	open
CM vs HM	5 - B cells	/	chr2-238346116-238347487	ENST00000391993	TRAF3IP1	ENSG00000204104	protein_coding	cds	chr2-238347455-238347475	0	6.1895e-09	-0.231192	0.006	0.044	0.00128058	closed
CM vs HM	5 - B cells	/	chr2-25399238-25400234	ENST00000496972	DTNB	ENSG00000138101	protein_coding	gap	chr2-25388362-25427534	0	6.30279e-09	-0.25545	0.033	0.098	0.00130402	closed
CM vs HM	5 - B cells	/	chr8-8568700-8569673	ENST00000522661	CTD-3023L14.2	ENSG00000253130	lincRNA	gap	chr8-8561535-8569186	0	6.47147e-09	-0.303688	0.026	0.088	0.00133891	closed
CM vs HM	5 - B cells	/	chr20-4989271-4990192	ENST00000468355	SLC23A2	ENSG00000089057	protein_coding	gap	chr20-4970916-5010181	0	6.84252e-09	-0.25143	0.024	0.077	0.00141568	closed
CM vs HM	5 - B cells	/	chr14-103689087-103690155	ENST00000634686	KLC1	ENSG00000126214	protein_coding	gap	chr14-103679519-103692359	0	6.987e-09	-0.231595	0.007	0.045	0.00144558	closed
CM vs HM	5 - B cells	/	chr6-12047040-12048089	ENST00000627968	HIVEP1	ENSG00000095951	protein_coding	gap	chr6-12015669-12089183	0	7.10367e-09	-0.274905	0.015	0.066	0.00146971	closed
CM vs HM	5 - B cells	/	chr3-131361062-131362454	ENST00000513905	RP11-933H2.4	ENSG00000250608	processed_transcript	gap	chr3-131330868-131361565	0	7.4113e-09	0.139269	0.038	0.014	0.00153336	open
CM vs HM	5 - B cells	/	chr1-44220451-44221343	ENST00000372289	DMAP1	ENSG00000178028	protein_coding	cds	chr1-44220559-44220618	0	7.43628e-09	-0.249449	0.007	0.044	0.00153853	closed
CM vs HM	5 - B cells	/	chr14-106537192-106538798	ENST00000619530	LINC00221	ENSG00000270816	lincRNA	exon	chr14-106520612-106521073	16118	7.45401e-09	-0.209991	0.019	0.07	0.0015422	closed
CM vs HM	5 - B cells	/	chr15-56364905-56365880	ENST00000561221	TEX9	ENSG00000151575	protein_coding	cds	chr15-56365579-56365670	0	7.45844e-09	-0.274132	0.054	0.131	0.00154311	closed
CM vs HM	5 - B cells	/	chr5-72297897-72298911	ENST00000523654	MRPS27	ENSG00000113048	protein_coding	gap	chr5-72297703-72314080	0	7.6878e-09	-0.235959	0.024	0.081	0.00159057	closed
CM vs HM	5 - B cells	/	chr11-1588874-1589857	ENST00000624434	AP006285.2	ENSG00000278919	protein_coding	utr	chr11-1585429-1585989	2884	7.7519e-09	-0.273501	0.011	0.057	0.00160383	closed
CM vs HM	5 - B cells	/	chr16-89122242-89123300	ENST00000543676	ACSF3	ENSG00000176715	protein_coding	cds	chr16-89122374-89122442	0	7.82533e-09	-0.287172	0.036	0.105	0.00161902	closed
CM vs HM	5 - B cells	/	chr15-85317838-85319019	ENST00000560571	AKAP13	ENSG00000170776	protein_coding	exon	chr15-85380571-85380798	61551	8.05744e-09	-0.268143	0.017	0.072	0.00166704	closed
CM vs HM	5 - B cells	/	chr12-11546987-11547869	ENST00000536492	RP11-434C1.2	ENSG00000256237	lincRNA	gap	chr12-11541527-11555782	0	8.09938e-09	-0.164939	0.003	0.033	0.00167572	closed
CM vs HM	5 - B cells	/	chr11-692552-693535	ENST00000529717	DEAF1	ENSG00000177030	protein_coding	gap	chr11-691599-694678	0	8.14708e-09	0.0978885	0.022	0.005	0.00168559	open
CM vs HM	5 - B cells	/	chr11-30342302-30343450	ENST00000282032	ARL14EP	ENSG00000152219	protein_coding	utr	chr11-30336796-30338227	4074	8.26544e-09	-0.275628	0.063	0.153	0.00171008	closed
CM vs HM	5 - B cells	/	chr2-149021013-149022044	ENST00000482151	KIF5C	ENSG00000168280	protein_coding	gap	chr2-149011684-149023077	0	9.26388e-09	-0.287716	0.028	0.09	0.00191665	closed
CM vs HM	5 - B cells	/	chr19-2663793-2664864	ENST00000587867	GNG7	ENSG00000176533	protein_coding	gap	chr19-2646281-2683479	0	1.01964e-08	-0.242409	0.19	0.332	0.00210959	closed
CM vs HM	5 - B cells	/	chr11-69140334-69141291	ENST00000637084	TPCN2	ENSG00000162341	protein_coding	gap	chr11-69135533-69159445	0	1.03571e-08	-0.15272	0	0.021	0.00214283	closed
CM vs HM	5 - B cells	/	chr9-89501617-89502846	ENST00000455551	SEMA4D	ENSG00000187764	protein_coding	exon	chr9-89497919-89498130	3486	1.03901e-08	0.143338	0.035	0.013	0.00214965	open
CM vs HM	5 - B cells	/	chr11-128324243-128325372	ENST00000608492	RP11-702B10.1	ENSG00000272575	lincRNA	exon	chr11-128241278-128241441	82801	1.06159e-08	0.0750122	0.042	0.028	0.00219637	open
CM vs HM	5 - B cells	/	chr7-2109834-2111702	ENST00000491858	MAD1L1	ENSG00000002822	protein_coding	gap	chr7-2069339-2149151	0	1.08072e-08	-0.211788	0.013	0.063	0.00223595	closed
CM vs HM	5 - B cells	/	chr2-60971236-60972997	ENST00000407787	PUS10	ENSG00000162927	protein_coding	cds	chr2-60971523-60971557	0	1.08428e-08	-0.314801	0.111	0.23	0.00224332	closed
CM vs HM	5 - B cells	/	chr11-69972062-69973352	ENST00000534086	RP11-626H12.1	ENSG00000255191	lincRNA	exon	chr11-69985876-69986166	12523	1.09455e-08	0.138599	0.049	0.015	0.00226456	open
CM vs HM	5 - B cells	/	chr3-18444438-18446003	ENST00000493952	SATB1	ENSG00000182568	protein_coding	utr	chr3-18444607-18444873	0	1.12265e-08	0.163086	0.27	0.21	0.00232271	open
CM vs HM	5 - B cells	/	chr11-75536886-75537933	ENST00000336898	GDPD5	ENSG00000158555	protein_coding	exon	chr11-75525210-75525903	10982	1.16821e-08	-0.304044	0.054	0.137	0.00241697	closed
CM vs HM	5 - B cells	/	chr18-9710307-9712230	ENST00000583137	RAB31	ENSG00000168461	protein_coding	gap	chr18-9708445-9722741	0	1.18631e-08	-0.26325	0.044	0.118	0.00245442	closed
CM vs HM	5 - B cells	/	chr4-144644387-144646537	ENST00000434550	HHIP	ENSG00000164161	protein_coding	utr	chr4-144646172-144646675	0	1.29374e-08	0.0972135	0.038	0.013	0.00267668	open
CM vs HM	5 - B cells	/	chr8-30655562-30656440	ENST00000523499	GTF2E2	ENSG00000197265	protein_coding	gap	chr8-30653603-30657972	0	1.39852e-08	-0.273559	0.03	0.092	0.00289348	closed
CM vs HM	5 - B cells	/	chr17-75242043-75243095	ENST00000621217	GGA3	ENSG00000125447	protein_coding	cds	chr17-75242874-75242911	0	1.42055e-08	-0.348726	0.052	0.137	0.00293904	closed
CM vs HM	5 - B cells	/	chr2-174749767-174750503	ENST00000636168	CHRNA1	ENSG00000138435	protein_coding	cds	chr2-174749946-174750169	0	1.4307e-08	-0.279375	0.021	0.075	0.00296004	closed
CM vs HM	5 - B cells	/	chr15-69979280-69980515	ENST00000558939	TLE3	ENSG00000140332	protein_coding	utr	chr15-70047790-70050096	67274	1.6e-08	-0.266366	0.139	0.267	0.00331031	closed
CM vs HM	5 - B cells	/	chr7-121372265-121373256	ENST00000426156	FAM3C	ENSG00000196937	protein_coding	gap	chr7-121372140-121378909	0	1.60934e-08	-0.237537	0.022	0.08	0.00332965	closed
CM vs HM	5 - B cells	/	chr22-23207559-23208574	ENST00000487679	BCR	ENSG00000186716	protein_coding	gap	chr22-23199353-23253798	0	1.61522e-08	0.131454	0.06	0.028	0.00334181	open
CM vs HM	5 - B cells	/	chr8-133531392-133532441	ENST00000522873	ST3GAL1	ENSG00000008513	protein_coding	gap	chr8-133499190-133539636	0	1.6598e-08	-0.255395	0.018	0.071	0.00343403	closed
CM vs HM	5 - B cells	/	chr17-4073925-4075402	ENST00000572699	ZZEF1	ENSG00000074755	protein_coding	cds	chr17-4075097-4075180	0	1.66172e-08	-0.296838	0.037	0.107	0.00343802	closed
CM vs HM	5 - B cells	/	chr18-58970578-58971750	ENST00000592249	ZNF532	ENSG00000074657	protein_coding	gap	chr18-58953800-58979054	0	1.67571e-08	-0.330071	0.04	0.112	0.00346695	closed
CM vs HM	5 - B cells	/	chr16-58418957-58419962	ENST00000562322	RP11-481J2.2	ENSG00000260186	lincRNA	exon	chr16-58421326-58421385	1363	1.67737e-08	-0.219581	0.011	0.052	0.0034704	closed
CM vs HM	5 - B cells	/	chr14-80930608-80931645	ENST00000557411	CEP128	ENSG00000100629	protein_coding	gap	chr14-80916541-80939384	0	1.74296e-08	-0.280316	0.056	0.141	0.00360609	closed
CM vs HM	5 - B cells	/	chr1-111448759-111449793	ENST00000483994	ATP5F1	ENSG00000116459	protein_coding	cds	chr1-111449542-111449581	0	1.86197e-08	-0.246666	0.178	0.313	0.00385233	closed
CM vs HM	5 - B cells	/	chr8-102823997-102825053	ENST00000337198	AZIN1	ENSG00000155096	protein_coding	utr	chr8-102826357-102828566	1303	1.89805e-08	-0.258507	0.034	0.1	0.00392698	closed
CM vs HM	5 - B cells	/	chr1-87449186-87450237	ENST00000362448	RNA5SP52	ENSG00000199318	rRNA	exon	chr1-87453240-87453373	3002	1.95995e-08	-0.298648	0.038	0.105	0.00405504	closed
CM vs HM	5 - B cells	/	chr15-99555656-99556684	ENST00000560493	MEF2A	ENSG00000068305	protein_coding	exon	chr15-99565417-99565669	8732	2.00904e-08	-0.191614	0.017	0.064	0.0041566	closed
CM vs HM	5 - B cells	/	chr2-87824591-87826386	ENST00000398146	RGPD2	ENSG00000185304	protein_coding	cds	chr2-87825658-87825729	0	2.01779e-08	0.12407	0.022	0.003	0.0041747	open
CM vs HM	5 - B cells	/	chr13-27044669-27045739	ENST00000282344	USP12	ENSG00000152484	protein_coding	utr	chr13-27066142-27069282	20402	2.02029e-08	-0.261343	0.013	0.057	0.00417987	closed
CM vs HM	5 - B cells	/	chr6-7960623-7961593	ENST00000439343	BLOC1S5-TXNDC5	ENSG00000259040	protein_coding	gap	chr6-7904724-8026366	0	2.05922e-08	-0.219096	0.005	0.038	0.00426043	closed
CM vs HM	5 - B cells	/	chr5-69135951-69136981	ENST00000396591	SLC30A5	ENSG00000145740	protein_coding	utr	chr5-69129618-69131069	4881	2.09248e-08	-0.257798	0.025	0.081	0.00432924	closed
CM vs HM	5 - B cells	/	chr11-75507903-75508925	ENST00000532435	GDPD5	ENSG00000158555	protein_coding	gap	chr11-75490321-75525209	0	2.1251e-08	-0.294729	0.059	0.143	0.00439672	closed
CM vs HM	5 - B cells	/	chr15-97960009-97961047	ENST00000268042	ARRDC4	ENSG00000140450	protein_coding	cds	chr15-97960862-97961168	0	2.17025e-08	0.146989	0.409	0.37	0.00449014	open
CM vs HM	5 - B cells	/	chr11-60396356-60397646	ENST00000534688	MS4A14	ENSG00000166928	protein_coding	cds	chr11-60396703-60396716	0	2.19631e-08	-0.243851	0.04	0.109	0.00454405	closed
CM vs HM	5 - B cells	/	chr5-114957183-114958086	ENST00000509718	RP11-438C19.2	ENSG00000251132	lincRNA	exon	chr5-115031273-115031894	73186	2.2186e-08	-0.233685	0.005	0.038	0.00459018	closed
CM vs HM	5 - B cells	/	chr3-114427923-114428873	ENST00000492665	ZBTB20	ENSG00000181722	protein_coding	gap	chr3-114389106-114500351	0	2.2339e-08	-0.334307	0.055	0.134	0.00462183	closed
CM vs HM	5 - B cells	/	chr17-78705959-78706925	ENST00000591574	CYTH1	ENSG00000108669	protein_coding	gap	chr17-78702241-78708196	0	2.27291e-08	-0.268088	0.022	0.075	0.00470253	closed
CM vs HM	5 - B cells	/	chr2-227163206-227165608	ENST00000396578	COL4A3	ENSG00000169031	protein_coding	cds	chr2-227164727-227164813	0	2.30432e-08	-0.326657	0.082	0.179	0.00476752	closed
CM vs HM	5 - B cells	/	chr17-81560574-81561741	ENST00000571714	NPLOC4	ENSG00000182446	protein_coding	cds	chr17-81560562-81560629	0	2.32475e-08	-0.270179	0.025	0.084	0.00480978	closed
CM vs HM	5 - B cells	/	chr5-134925587-134927616	ENST00000512783	PCBD2	ENSG00000132570	protein_coding	gap	chr5-134910467-134959039	0	2.41255e-08	0.164871	0.028	0.005	0.00499144	open
CM vs HM	5 - B cells	/	chr1-24923137-24924226	ENST00000496967	RUNX3	ENSG00000020633	protein_coding	gap	chr1-24919345-24927573	0	2.41588e-08	-0.273851	0.036	0.107	0.00499835	closed
CM vs HM	5 - B cells	/	chr19-55677813-55679009	ENST00000411543	EPN1	ENSG00000063245	protein_coding	cds	chr19-55678527-55678855	0	2.48163e-08	-0.243464	0.172	0.306	0.00513438	closed
CM vs HM	5 - B cells	/	chr16-1713597-1714877	ENST00000610761	MAPK8IP3	ENSG00000138834	protein_coding	gap	chr16-1706658-1724556	0	2.6246e-08	-0.272636	0.133	0.25	0.00543016	closed
CM vs HM	5 - B cells	/	chr21-42266725-42267694	ENST00000462050	ABCG1	ENSG00000160179	protein_coding	gap	chr21-42225915-42271069	0	2.69491e-08	0.0736239	0.014	0.002	0.00557563	open
CM vs HM	5 - B cells	/	chr19-56476234-56478395	ENST00000592189	ZNF667	ENSG00000198046	protein_coding	utr	chr19-56477272-56477367	0	2.69838e-08	0.154079	0.187	0.128	0.00558282	open
CM vs HM	5 - B cells	/	chr10-70494514-70495614	ENST00000263563	PALD1	ENSG00000107719	protein_coding	gap	chr10-70479060-70525922	0	2.84728e-08	0.100276	0.024	0.006	0.00589088	open
CM vs HM	5 - B cells	/	chr7-3078186-3079233	ENST00000437145	AC024028.1	ENSG00000228334	lincRNA	exon	chr7-3083252-3083618	4018	2.90281e-08	-0.202801	0.009	0.044	0.00600578	closed
CM vs HM	5 - B cells	/	chr9-131621049-131622203	ENST00000419442	RAPGEF1	ENSG00000107263	protein_coding	cds	chr9-131621796-131621998	0	2.95857e-08	-0.281149	0.04	0.111	0.00612113	closed
CM vs HM	5 - B cells	/	chr18-76494828-76495888	ENST00000443185	ZNF516	ENSG00000101493	protein_coding	utr	chr18-76495144-76495190	0	3.03447e-08	0.115831	0.063	0.034	0.00627818	open
CM vs HM	5 - B cells	/	chr3-122066715-122068555	ENST00000493101	CD86	ENSG00000114013	protein_coding	gap	chr3-122055504-122091600	0	3.25369e-08	-0.22435	0.015	0.062	0.00673172	closed
CM vs HM	5 - B cells	/	chr17-1200773-1201935	ENST00000575934	ABR	ENSG00000159842	protein_coding	gap	chr17-1125368-1228792	0	3.30195e-08	-0.316591	0.042	0.115	0.00683158	closed
CM vs HM	5 - B cells	/	chr6-169958751-169959844	ENST00000427017	RP1-182D15.2	ENSG00000236173	lincRNA	exon	chr6-169809585-169810102	148648	3.6323e-08	0.169829	0.087	0.047	0.00751505	open
CM vs HM	5 - B cells	/	chr13-28707620-28708678	ENST00000380814	SLC46A3	ENSG00000139508	protein_coding	gap	chr13-28704100-28710759	0	3.68183e-08	-0.266153	0.016	0.064	0.00761752	closed
CM vs HM	5 - B cells	/	chr2-46545031-46545950	ENST00000489471	RHOQ	ENSG00000119729	protein_coding	gap	chr2-46543813-46560523	0	3.7779e-08	-0.26967	0.035	0.101	0.00781629	closed
CM vs HM	5 - B cells	/	chr15-38672713-38673598	ENST00000560203	RP11-275I4.2	ENSG00000259747	lincRNA	gap	chr15-38671941-38688893	0	3.83682e-08	-0.232668	0.034	0.099	0.00793819	closed
CM vs HM	5 - B cells	/	chr12-110717785-110718951	ENST00000335007	PPP1CC	ENSG00000186298	protein_coding	utr	chr12-110719680-110721075	728	3.86062e-08	-0.231765	0.041	0.109	0.00798743	closed
CM vs HM	5 - B cells	/	chr14-61337498-61338471	ENST00000556778	PRKCH	ENSG00000027075	protein_coding	gap	chr14-61187669-61443110	0	4.08003e-08	0.085052	0.024	0.01	0.00844138	open
CM vs HM	5 - B cells	/	chr5-168481139-168482091	ENST00000231572	RARS	ENSG00000113643	protein_coding	exon	chr5-168486445-168486543	4353	4.18159e-08	-0.188476	0.002	0.027	0.0086515	closed
CM vs HM	5 - B cells	/	chr17-3870614-3871897	ENST00000381769	CAMKK1	ENSG00000004660	protein_coding	gap	chr17-3869889-3872553	0	4.49227e-08	0.117998	0.038	0.016	0.00929428	open
CM vs HM	5 - B cells	/	chr9-107488056-107488992	ENST00000610832	KLF4	ENSG00000136826	protein_coding	cds	chr9-107488930-107489028	0	4.54123e-08	0.11485	0.063	0.034	0.00939558	open
CM vs HM	5 - B cells	/	chr5-159427153-159428314	ENST00000518418	AC008703.1	ENSG00000253298	lincRNA	exon	chr5-159448556-159449456	20241	4.61952e-08	-0.249885	0.024	0.078	0.00955757	closed
CM vs HM	5 - B cells	/	chr3-195657454-195658446	ENST00000457233	LINC00969	ENSG00000242086	lincRNA	gap	chr3-195658166-195661755	0	4.86568e-08	-0.262733	0.036	0.105	0.0100668	closed
CM vs HM	5 - B cells	/	chr17-64323548-64324652	ENST00000563924	PECAM1	ENSG00000261371	protein_coding	cds	chr17-64323816-64323845	0	4.91506e-08	-0.228959	0.016	0.06	0.010169	closed
CM vs HM	5 - B cells	/	chr12-121248324-121249318	ENST00000545538	CAMKK2	ENSG00000110931	protein_coding	cds	chr12-121248606-121248734	0	4.95737e-08	-0.256789	0.013	0.058	0.0102566	closed
CM vs HM	5 - B cells	/	chr5-35211917-35213102	ENST00000618457	PRLR	ENSG00000113494	protein_coding	gap	chr5-35118123-35230267	0	5.00915e-08	-0.245204	0.016	0.062	0.0103637	closed
CM vs HM	5 - B cells	/	chr12-126771911-126773012	ENST00000542248	LINC00944	ENSG00000256128	lincRNA	gap	chr12-126763499-126772078	0	5.29066e-08	-0.346608	0.051	0.132	0.0109461	closed
CM vs HM	5 - B cells	/	chr19-10639519-10640461	ENST00000591194	SLC44A2	ENSG00000129353	protein_coding	gap	chr19-10638316-10642366	0	5.30603e-08	-0.277934	0.021	0.078	0.0109779	closed
CM vs HM	5 - B cells	/	chr19-14015182-14016245	ENST00000586913	RFX1	ENSG00000132005	protein_coding	exon	chr19-14006750-14007039	8142	5.40105e-08	-0.285207	0.031	0.101	0.0111745	closed
CM vs HM	5 - B cells	/	chr11-73308868-73309856	ENST00000263674	ARHGEF17	ENSG00000110237	protein_coding	cds	chr11-73308639-73311830	0	5.49112e-08	0.0856505	0.018	0.004	0.0113609	open
CM vs HM	5 - B cells	/	chr19-18277160-18278159	ENST00000252818	JUND	ENSG00000130522	protein_coding	utr	chr19-18279760-18280440	1600	5.78216e-08	0.115096	0.117	0.092	0.011963	open
CM vs HM	5 - B cells	/	chr7-152027349-152028597	ENST00000431668	GALNT11	ENSG00000178234	protein_coding	utr	chr7-152027597-152027718	0	5.87481e-08	0.0738933	0.016	0.005	0.0121547	open
CM vs HM	5 - B cells	/	chr7-150891443-150892461	ENST00000493429	AOC1	ENSG00000002726	protein_coding	utr	chr7-150861210-150861504	29938	5.94299e-08	-0.205845	0.006	0.035	0.0122958	closed
CM vs HM	5 - B cells	/	chr12-31806876-31807978	ENST00000340398	H3F3C	ENSG00000188375	protein_coding	exon	chr12-31791185-31792241	14634	6.04574e-08	-0.262912	0.021	0.068	0.0125083	closed
CM vs HM	5 - B cells	/	chr2-223895215-223896178	ENST00000429915	WDFY1	ENSG00000085449	protein_coding	cds	chr2-223895504-223895630	0	6.06931e-08	-0.262818	0.02	0.074	0.0125571	closed
CM vs HM	5 - B cells	/	chr7-121385458-121386403	ENST00000426156	FAM3C	ENSG00000196937	protein_coding	gap	chr7-121383011-121396161	0	6.37022e-08	-0.227458	0.059	0.14	0.0131797	closed
CM vs HM	5 - B cells	/	chr6-97668717-97669870	ENST00000634677	RP11-436D23.1	ENSG00000271860	lincRNA	gap	chr6-97618232-97702282	0	6.53151e-08	-0.263334	0.015	0.063	0.0135134	closed
CM vs HM	5 - B cells	/	chr7-151400386-151401390	ENST00000628331	WDR86	ENSG00000187260	protein_coding	gap	chr7-151400242-151409426	0	6.54081e-08	-0.205974	0.105	0.208	0.0135326	closed
CM vs HM	5 - B cells	/	chr3-14215907-14216991	ENST00000306024	LSM3	ENSG00000170860	protein_coding	utr	chr3-14198117-14201119	14787	6.60318e-08	0.148509	0.092	0.052	0.0136617	open
CM vs HM	5 - B cells	/	chr20-38164810-38165889	ENST00000453095	TGM2	ENSG00000198959	protein_coding	cds	chr20-38165189-38165198	0	6.78464e-08	-0.268609	0.029	0.092	0.0140371	closed
CM vs HM	5 - B cells	/	chr1-160307011-160308058	ENST00000368069	COPA	ENSG00000122218	protein_coding	cds	chr1-160307163-160307245	0	6.96203e-08	-0.244812	0.02	0.068	0.0144041	closed
CM vs HM	5 - B cells	/	chr9-124264486-124265521	ENST00000545174	NEK6	ENSG00000119408	protein_coding	gap	chr9-124258362-124301935	0	7.01592e-08	-0.253083	0.03	0.09	0.0145156	closed
CM vs HM	5 - B cells	/	chr19-2393971-2395068	ENST00000613480	TMPRSS9	ENSG00000178297	protein_coding	gap	chr19-2389928-2396538	0	7.11005e-08	-0.208588	0.014	0.054	0.0147103	closed
CM vs HM	5 - B cells	/	chr12-106759807-106760809	ENST00000392842	RFX4	ENSG00000111783	protein_coding	gap	chr12-106750794-106761196	0	7.13355e-08	-0.224634	0.044	0.109	0.0147589	closed
CM vs HM	5 - B cells	/	chr19-58033345-58034512	ENST00000601162	ZSCAN1	ENSG00000152467	protein_coding	utr	chr19-58034106-58034161	0	7.14863e-08	0.163449	0.052	0.021	0.0147902	open
CM vs HM	5 - B cells	/	chr3-8501266-8502207	ENST00000456506	LMCD1	ENSG00000071282	protein_coding	cds	chr3-8501939-8501980	0	7.17598e-08	-0.273621	0.081	0.174	0.0148467	closed
CM vs HM	5 - B cells	/	chr1-236159515-236160592	ENST00000419162	GPR137B	ENSG00000077585	protein_coding	gap	chr1-236143037-236178413	0	7.23607e-08	-0.233268	0.009	0.049	0.0149711	closed
CM vs HM	5 - B cells	/	chr14-77081143-77082018	ENST00000554043	RP11-7F17.4	ENSG00000258473	lincRNA	gap	chr14-77081501-77086366	0	7.2673e-08	-0.212312	0.005	0.036	0.0150357	closed
CM vs HM	5 - B cells	/	chr2-231394433-231396076	ENST00000287590	B3GNT7	ENSG00000156966	protein_coding	cds	chr2-231395804-231395814	0	7.34991e-08	-0.270374	0.079	0.171	0.0152066	closed
CM vs HM	5 - B cells	/	chr8-100901441-100902447	ENST00000395957	YWHAZ	ENSG00000164924	protein_coding	utr	chr8-100916525-100920692	14077	7.39969e-08	-0.231432	0.058	0.138	0.0153096	closed
CM vs HM	5 - B cells	/	chr21-38861812-38862853	ENST00000626259	AF064858.6	ENSG00000205622	lincRNA	exon	chr21-38863676-38864225	822	7.44242e-08	0.13039	0.077	0.041	0.015398	open
CM vs HM	5 - B cells	/	chr19-6527877-6529469	ENST00000245817	TNFSF9	ENSG00000125657	protein_coding	exon	chr19-6530999-6531303	1529	7.48814e-08	-0.320029	0.076	0.17	0.0154926	closed
CM vs HM	5 - B cells	/	chr12-70049561-70050677	ENST00000547771	MYRFL	ENSG00000166268	protein_coding	utr	chr12-69958532-69959097	90463	7.54773e-08	-0.25651	0.018	0.067	0.0156159	closed
CM vs HM	5 - B cells	/	chr7-25966747-25969120	ENST00000602992	CTD-2227E11.1	ENSG00000270933	lincRNA	exon	chr7-25948657-25949403	17343	7.6064e-08	-0.315383	0.092	0.198	0.0157373	closed
CM vs HM	5 - B cells	/	chr1-149176322-149177337	ENST00000619653	CH17-189H20.1	ENSG00000274265	lincRNA	gap	chr1-149176251-149180295	0	7.75569e-08	0.131992	0.058	0.028	0.0160461	open
CM vs HM	5 - B cells	/	chr16-4363803-4364673	ENST00000575334	CORO7-PAM16	ENSG00000103426	protein_coding	cds	chr16-4364597-4364689	0	7.95954e-08	-0.293132	0.027	0.087	0.0164679	closed
CM vs HM	5 - B cells	/	chr1-39525444-39526537	ENST00000331593	BMP8A	ENSG00000183682	protein_coding	cds	chr1-39525649-39525798	0	8.10397e-08	-0.260863	0.061	0.138	0.0167667	closed
CM vs HM	5 - B cells	/	chr2-174600079-174601115	ENST00000409415	WIPF1	ENSG00000115935	protein_coding	gap	chr2-174585612-174682773	0	8.2383e-08	-0.246589	0.079	0.172	0.0170446	closed
CM vs HM	5 - B cells	/	chr2-43595553-43596601	ENST00000408045	THADA	ENSG00000115970	protein_coding	utr	chr2-43595931-43596038	0	8.41099e-08	-0.239789	0.19	0.329	0.0174019	closed
CM vs HM	5 - B cells	/	chr9-133683257-133684340	ENST00000439388	SARDH	ENSG00000123453	protein_coding	gap	chr9-133671698-133685192	0	8.78907e-08	0.0705704	0.015	0.003	0.0181842	open
CM vs HM	5 - B cells	/	chrX-74419684-74420834	ENST00000587091	SLC16A2	ENSG00000147100	protein_coding	exon	chrX-74421461-74422067	626	8.79871e-08	0.112757	0.02	0.003	0.0182041	open
CM vs HM	5 - B cells	/	chr19-11581415-11582420	ENST00000593279	ZNF627	ENSG00000198551	protein_coding	gap	chr19-11575354-11604209	0	8.83009e-08	-0.233882	0.122	0.233	0.018269	closed
CM vs HM	5 - B cells	/	chr11-27233744-27234727	ENST00000529615	CCDC34	ENSG00000109881	protein_coding	exon	chr11-27330827-27330855	96099	8.97001e-08	-0.302363	0.033	0.095	0.0185585	closed
CM vs HM	5 - B cells	/	chr17-83080366-83082628	ENST00000570778	METRNL	ENSG00000176845	protein_coding	gap	chr17-83080230-83084937	0	9.03986e-08	-0.272629	0.093	0.187	0.018703	closed
CM vs HM	5 - B cells	/	chr7-134669428-134670602	ENST00000418040	BPGM	ENSG00000172331	protein_coding	gap	chr7-134662109-134678852	0	9.13763e-08	0.0885797	0.031	0.014	0.0189053	open
CM vs HM	5 - B cells	/	chr1-1419688-1420582	ENST00000537107	ANKRD65	ENSG00000235098	protein_coding	cds	chr1-1420052-1420592	0	9.30092e-08	0.0834961	0.011	0.001	0.0192431	open
CM vs HM	5 - B cells	/	chr4-123616580-123617631	ENST00000514823	LINC01091	ENSG00000249464	lincRNA	exon	chr4-123650267-123650332	32635	9.52909e-08	0.110355	0.059	0.032	0.0197152	open
CM vs HM	5 - B cells	/	chr10-311736-312785	ENST00000634311	DIP2C	ENSG00000151240	protein_coding	gap	chr10-311567-327005	0	9.69593e-08	0.136775	0.07	0.034	0.0200604	open
CM vs HM	5 - B cells	/	chr4-14177800-14178890	ENST00000514863	RP11-669M16.1	ENSG00000249988	lincRNA	gap	chr4-14164604-14242645	0	9.86086e-08	-0.216103	0.036	0.1	0.0204016	closed
CM vs HM	5 - B cells	/	chr11-96013684-96014790	ENST00000618849	MAML2	ENSG00000184384	protein_coding	gap	chr11-95991724-96091891	0	9.96515e-08	0.115596	0.032	0.01	0.0206174	open
CM vs HM	5 - B cells	/	chr14-95576721-95577733	ENST00000556346	RP11-1070N10.4	ENSG00000258390	lincRNA	gap	chr14-95573685-95580767	0	9.98494e-08	-0.27075	0.048	0.118	0.0206583	closed
CM vs HM	5 - B cells	/	chr10-103467170-103468192	ENST00000369783	CALHM3	ENSG00000183128	protein_coding	utr	chr10-103472804-103473212	4611	1.00978e-07	-0.270452	0.02	0.072	0.0208918	closed
CM vs HM	5 - B cells	/	chr18-44729444-44730417	ENST00000426838	SETBP1	ENSG00000152217	protein_coding	gap	chr18-44701833-44869229	0	1.0576e-07	-0.245857	0.017	0.065	0.0218812	closed
CM vs HM	5 - B cells	/	chr7-24877375-24878553	ENST00000441059	OSBPL3	ENSG00000070882	protein_coding	gap	chr7-24872070-24892376	0	1.08142e-07	-0.228361	0.025	0.081	0.022374	closed
CM vs HM	5 - B cells	/	chr12-27823869-27824856	ENST00000381271	KLHL42	ENSG00000087448	protein_coding	utr	chr12-27798167-27803040	20828	1.11418e-07	-0.280179	0.026	0.077	0.0230517	closed
CM vs HM	5 - B cells	/	chr1-162529991-162531057	ENST00000545294	UHMK1	ENSG00000152332	protein_coding	utr	chr1-162522551-162529629	361	1.12798e-07	-0.249804	0.056	0.131	0.0233373	closed
CM vs HM	5 - B cells	/	chr10-108594108-108594986	ENST00000366253	RP11-163F15.1	ENSG00000203434	lincRNA	exon	chr10-108561677-108561815	32292	1.13182e-07	-0.205625	0.004	0.031	0.0234168	closed
CM vs HM	5 - B cells	/	chr3-1380949-1381966	ENST00000446702	CNTN6	ENSG00000134115	protein_coding	gap	chr3-1377076-1382941	0	1.13776e-07	-0.216268	0.008	0.043	0.0235396	closed
CM vs HM	5 - B cells	/	chr14-100546022-100547161	ENST00000637716	BEGAIN	ENSG00000183092	protein_coding	cds	chr14-100546501-100546662	0	1.14491e-07	0.15002	0.089	0.049	0.0236876	open
CM vs HM	5 - B cells	/	chr17-41972800-41973949	ENST00000472031	CNP	ENSG00000173786	protein_coding	cds	chr17-41973475-41973481	0	1.15191e-07	-0.262753	0.02	0.068	0.0238325	closed
CM vs HM	5 - B cells	/	chr2-223893622-223894562	ENST00000429915	WDFY1	ENSG00000085449	protein_coding	cds	chr2-223894290-223894339	0	1.16487e-07	-0.255513	0.027	0.082	0.0241006	closed
CM vs HM	5 - B cells	/	chr6-137715324-137716583	ENST00000635999	RP11-95M15.1	ENSG00000230533	lincRNA	gap	chr6-137674125-137763816	0	1.18098e-07	0.0780477	0.032	0.019	0.0244338	open
CM vs HM	5 - B cells	/	chr5-67192705-67193734	ENST00000256447	CD180	ENSG00000134061	protein_coding	gap	chr5-67186018-67196551	0	1.18464e-07	-0.215074	0.036	0.096	0.0245096	closed
CM vs HM	5 - B cells	/	chr14-65168518-65169868	ENST00000531609	CTD-2509G16.2	ENSG00000255002	lincRNA	exon	chr14-65212893-65213926	43024	1.21111e-07	-0.229396	0.011	0.053	0.0250572	closed
CM vs HM	5 - B cells	/	chr1-232629668-232630889	ENST00000366630	SIPA1L2	ENSG00000116991	protein_coding	exon	chr1-232561469-232561558	68109	1.21636e-07	0.111777	0.108	0.078	0.0251658	open
CM vs HM	5 - B cells	/	chr6-25053436-25054578	ENST00000416595	RP3-425P12.1	ENSG00000223623	lincRNA	gap	chr6-25054550-25057011	0	1.24808e-07	-0.227119	0.022	0.073	0.0258221	closed
CM vs HM	5 - B cells	/	chr8-125698289-125699388	ENST00000518339	RP11-697B24.1	ENSG00000253470	lincRNA	exon	chr8-125749055-125749348	49666	1.2531e-07	-0.292699	0.057	0.135	0.025926	closed
CM vs HM	5 - B cells	/	chr2-58023251-58024466	ENST00000478687	VRK2	ENSG00000028116	protein_coding	gap	chr2-58018087-58025664	0	1.2581e-07	-0.273112	0.032	0.088	0.0260294	closed
CM vs HM	5 - B cells	/	chr13-73765554-73766540	ENST00000377669	KLF12	ENSG00000118922	protein_coding	gap	chr13-73765001-73813151	0	1.40012e-07	0.124067	0.082	0.053	0.0289679	open
CM vs HM	5 - B cells	/	chr19-55276166-55277265	ENST00000593263	HSPBP1	ENSG00000133265	protein_coding	gap	chr19-55274623-55277641	0	1.41923e-07	-0.25139	0.074	0.162	0.0293632	closed
CM vs HM	5 - B cells	/	chr10-11677825-11678860	ENST00000604086	RP11-138I18.2	ENSG00000271046	lincRNA	exon	chr10-11679675-11680514	814	1.42755e-07	-0.253142	0.058	0.134	0.0295352	closed
CM vs HM	5 - B cells	/	chr6-37679753-37680954	ENST00000515437	MDGA1	ENSG00000112139	protein_coding	gap	chr6-37664107-37699201	0	1.46745e-07	-0.233544	0.073	0.161	0.0303608	closed
CM vs HM	5 - B cells	/	chr15-101156166-101157201	ENST00000557903	RP11-424I19.2	ENSG00000259182	lincRNA	exon	chr15-101168530-101168646	11328	1.47362e-07	-0.264137	0.034	0.094	0.0304885	closed
CM vs HM	5 - B cells	/	chr15-80009726-80010676	ENST00000267953	BCL2A1	ENSG00000140379	protein_coding	exon	chr15-79970700-79971446	38279	1.50795e-07	-0.23621	0.013	0.052	0.0311987	closed
CM vs HM	5 - B cells	/	chr7-157502490-157503633	ENST00000449903	AC006372.5	ENSG00000223872	lincRNA	gap	chr7-157503110-157503351	0	1.51046e-07	0.0825297	0.022	0.009	0.0312507	open
CM vs HM	5 - B cells	/	chr15-22775613-22776675	ENST00000437912	NIPA1	ENSG00000170113	protein_coding	gap	chr15-22774314-22810748	0	1.51535e-07	-0.251656	0.013	0.055	0.0313518	closed
CM vs HM	5 - B cells	/	chr3-277923-279093	ENST00000453040	CHL1	ENSG00000134121	protein_coding	gap	chr3-244693-319682	0	1.51619e-07	-0.236937	0.073	0.152	0.0313693	closed
CM vs HM	5 - B cells	/	chr17-4395727-4397799	ENST00000571980	UBE2G1	ENSG00000132388	protein_coding	exon	chr17-4366271-4366628	29098	1.52823e-07	-0.255398	0.1	0.194	0.0316183	closed
CM vs HM	5 - B cells	/	chr4-123442986-123444983	ENST00000622283	SPRY1	ENSG00000164056	protein_coding	utr	chr4-123402552-123403760	39225	1.54626e-07	0.131765	0.112	0.073	0.0319914	open
CM vs HM	5 - B cells	/	chr22-37633078-37634455	ENST00000406772	GGA1	ENSG00000100083	protein_coding	utr	chr22-37632712-37633563	0	1.56291e-07	-0.248298	0.102	0.197	0.0323358	closed
CM vs HM	5 - B cells	/	chr12-24378447-24379546	ENST00000540811	RP11-444D3.1	ENSG00000255864	lincRNA	gap	chr12-24368640-24407484	0	1.57098e-07	-0.258087	0.035	0.098	0.0325029	closed
CM vs HM	5 - B cells	/	chr12-10212023-10214103	ENST00000629504	GABARAPL1	ENSG00000139112	protein_coding	cds	chr12-10213836-10213877	0	1.6088e-07	0.063826	0.188	0.172	0.0332853	open
CM vs HM	5 - B cells	/	chr8-98246917-98247932	ENST00000522188	NIPAL2	ENSG00000104361	protein_coding	gap	chr8-98236215-98252462	0	1.61287e-07	-0.242531	0.017	0.063	0.0333696	closed
CM vs HM	5 - B cells	/	chr19-40465489-40466631	ENST00000597870	BLVRB	ENSG00000090013	protein_coding	cds	chr19-40465610-40465688	0	1.62566e-07	-0.189219	0.383	0.564	0.033634	closed
CM vs HM	5 - B cells	/	chr17-78275989-78277053	ENST00000374945	RP11-219G17.4	ENSG00000204277	lincRNA	gap	chr17-78271968-78278443	0	1.67931e-07	-0.261065	0.044	0.109	0.034744	closed
CM vs HM	5 - B cells	/	chr12-69906135-69907476	ENST00000552032	MYRFL	ENSG00000166268	protein_coding	gap	chr12-69903845-69909968	0	1.70723e-07	-0.218424	0.014	0.06	0.0353218	closed
CM vs HM	5 - B cells	/	chr10-22596852-22597808	ENST00000545335	PIP4K2A	ENSG00000150867	protein_coding	gap	chr10-22591782-22607926	0	1.72257e-07	-0.302441	0.032	0.097	0.0356391	closed
CM vs HM	5 - B cells	/	chr1-75338883-75339728	ENST00000370859	SLC44A5	ENSG00000137968	protein_coding	cds	chr1-75339582-75339630	0	1.72275e-07	-0.24235	0.011	0.048	0.0356429	closed
CM vs HM	5 - B cells	/	chr4-3484187-3485853	ENST00000507039	DOK7	ENSG00000175920	protein_coding	cds	chr4-3485539-3485658	0	1.73634e-07	-0.217536	0.18	0.313	0.0359241	closed
CM vs HM	5 - B cells	/	chr7-99081055-99082157	ENST00000480055	SMURF1	ENSG00000198742	protein_coding	gap	chr7-99061838-99081074	0	1.75173e-07	0.0746557	0.011	0.001	0.0362424	open
CM vs HM	5 - B cells	/	chr20-43914278-43915870	ENST00000341197	TOX2	ENSG00000124191	protein_coding	cds	chr20-43914892-43914990	0	1.76636e-07	-0.250471	0.034	0.096	0.036545	closed
CM vs HM	5 - B cells	/	chr12-9721397-9722437	ENST00000621400	CLECL1	ENSG00000184293	protein_coding	gap	chr12-9718775-9722643	0	1.77081e-07	-0.225037	0.057	0.137	0.0366372	closed
CM vs HM	5 - B cells	/	chr12-9442823-9443778	ENST00000567749	RP13-735L24.1	ENSG00000260423	lincRNA	exon	chr12-9395719-9397617	45205	1.82774e-07	-0.188059	0.002	0.025	0.037815	closed
CM vs HM	5 - B cells	/	chr17-77320442-77321451	ENST00000591934	2024-09-09	ENSG00000184640	protein_coding	gap	chr17-77320349-77322788	0	1.82833e-07	-0.253958	0.038	0.103	0.0378273	closed
CM vs HM	5 - B cells	/	chr12-32550180-32551096	ENST00000583694	FGD4	ENSG00000139132	protein_coding	gap	chr12-32502339-32556873	0	1.84296e-07	-0.139529	0.002	0.023	0.0381298	closed
CM vs HM	5 - B cells	/	chr1-226662598-226663551	ENST00000429204	ITPKB	ENSG00000143772	protein_coding	gap	chr1-226648772-226735526	0	1.84318e-07	-0.209287	0.248	0.391	0.0381344	closed
CM vs HM	5 - B cells	/	chr4-83083739-83084784	ENST00000311507	PLAC8	ENSG00000145287	protein_coding	utr	chr4-83090048-83090971	5263	1.8865e-07	-0.229868	0.043	0.11	0.0390308	closed
CM vs HM	5 - B cells	/	chr19-51606643-51607625	ENST00000534261	SIGLEC5	ENSG00000105501	protein_coding	utr	chr19-51611927-51612230	4301	1.93746e-07	-0.250336	0.094	0.187	0.0400851	closed
CM vs HM	5 - B cells	/	chr4-89898014-89899082	ENST00000394980	MMRN1	ENSG00000138722	protein_coding	gap	chr4-89895595-89909275	0	1.9849e-07	0.0997757	0.017	0.002	0.0410665	open
CM vs HM	5 - B cells	/	chr9-63816980-63818410	ENST00000417843	RP11-764K9.1	ENSG00000225411	lincRNA	exon	chr9-63814093-63814159	2820	1.98644e-07	-0.278646	0.166	0.293	0.0410984	closed
CM vs HM	5 - B cells	/	chr2-176490949-176492044	ENST00000412153	AC017048.1	ENSG00000229434	lincRNA	exon	chr2-176506245-176506536	14200	1.99902e-07	-0.231238	0.026	0.079	0.0413588	closed
CM vs HM	5 - B cells	/	chr4-39031912-39032970	ENST00000381938	TMEM156	ENSG00000121895	protein_coding	cds	chr4-39032226-39032313	0	2.0268e-07	-0.23332	0.042	0.111	0.0419335	closed
CM vs HM	5 - B cells	/	chr8-142325408-142326912	ENST00000524325	TSNARE1	ENSG00000171045	protein_coding	gap	chr8-142318635-142330900	0	2.03131e-07	-0.307559	0.031	0.092	0.0420268	closed
CM vs HM	5 - B cells	/	chr2-100393821-100394819	ENST00000409701	CHST10	ENSG00000115526	protein_coding	gap	chr2-100393783-100395508	0	2.04844e-07	-0.286375	0.1	0.2	0.0423812	closed
CM vs HM	5 - B cells	/	chr20-45419237-45420345	ENST00000543458	PIGT	ENSG00000124155	protein_coding	cds	chr20-45420332-45420429	0	2.08442e-07	-0.299686	0.047	0.12	0.0431257	closed
CM vs HM	5 - B cells	/	chr20-49630275-49631292	ENST00000371711	B4GALT5	ENSG00000158470	protein_coding	utr	chr20-49632945-49636311	1652	2.08869e-07	-0.223452	0.007	0.041	0.043214	closed
CM vs HM	5 - B cells	/	chr19-29695834-29696843	ENST00000623113	C19orf12	ENSG00000131943	protein_coding	utr	chr19-29698886-29702711	2042	2.11737e-07	0.101045	0.018	0.003	0.0438074	open
CM vs HM	5 - B cells	/	chr3-114450867-114451970	ENST00000628886	RP11-197K3.1	ENSG00000242290	lincRNA	gap	chr3-114445650-114453576	0	2.14936e-07	-0.28821	0.052	0.131	0.0444691	closed
CM vs HM	5 - B cells	/	chr16-80518161-80519146	ENST00000562982	DYNLRB2	ENSG00000168589	protein_coding	exon	chr16-80540734-80540854	21587	2.19572e-07	-0.217622	0.011	0.047	0.0454283	closed
CM vs HM	5 - B cells	/	chr2-239911020-239912099	ENST00000419408	NDUFA10	ENSG00000130414	protein_coding	gap	chr2-239895315-239990073	0	2.20344e-07	-0.200583	0.019	0.064	0.0455881	closed
CM vs HM	5 - B cells	/	chr14-93962305-93963656	ENST00000557613	ASB2	ENSG00000100628	protein_coding	gap	chr14-93954484-93964333	0	2.21696e-07	-0.252799	0.106	0.21	0.0458679	closed
CM vs HM	5 - B cells	/	chr12-682228-683307	ENST00000541881	RP11-218M22.2	ENSG00000256672	lincRNA	gap	chr12-681896-683994	0	2.24874e-07	-0.260986	0.067	0.153	0.0465253	closed
CM vs HM	5 - B cells	/	chr1-40400023-40400883	ENST00000614549	SMAP2	ENSG00000084070	protein_coding	gap	chr1-40393505-40406735	0	2.26001e-07	-0.247997	0.016	0.062	0.0467584	closed
CM vs HM	5 - B cells	/	chr16-29007680-29008675	ENST00000395461	LAT	ENSG00000213658	protein_coding	utr	chr16-28990189-28990783	16896	2.32449e-07	0.0619497	0.009	0.001	0.0480925	open
CM vs HM	5 - B cells	/	chr5-1501638-1502719	ENST00000514484	LPCAT1	ENSG00000153395	protein_coding	gap	chr5-1501604-1521346	0	2.3659e-07	-0.280327	0.055	0.139	0.0489493	closed
CM vs HM	5 - B cells	/	chr10-102711331-102712458	ENST00000260746	ARL3	ENSG00000138175	protein_coding	gap	chr10-102705490-102714272	0	2.37446e-07	-0.200106	0.012	0.051	0.0491265	closed
CM vs HM	5 - B cells	/	chr2-109193956-109195066	ENST00000309415	SH3RF3	ENSG00000172985	protein_coding	gap	chr2-109130114-109347673	0	2.38084e-07	0.135921	0.054	0.024	0.0492585	open
CM vs HM	5 - B cells	/	chr1-171252204-171253181	ENST00000617670	FMO1	ENSG00000010932	protein_coding	gap	chr1-171248624-171258081	0	2.38704e-07	-0.171434	0.015	0.053	0.0493867	closed
CM vs HM	5 - B cells	/	chr9-91414996-91416028	ENST00000297689	NFIL3	ENSG00000165030	protein_coding	gap	chr9-91410907-91423639	0	2.3966e-07	-0.208786	0.014	0.061	0.0495844	closed
CM vs HM	5 - B cells	/	chr7-155741423-155742502	ENST00000401878	RBM33	ENSG00000184863	protein_coding	cds	chr7-155741819-155742106	0	2.39971e-07	-0.278931	0.022	0.075	0.0496488	closed
CM vs HM	6 - NK + T	6a - CD4+ TN	chr7-4204527-4205444	ENST00000615806	SDK1	ENSG00000146555	protein_coding	gap	chr7-4178587-4205878	0	1.32379e-37	0.442098	0.092	0.001	2.73885e-32	open
CM vs HM	6 - NK + T	6a - CD4+ TN	chr22-18528382-18529603	ENST00000613577	TMEM191B	ENSG00000278558	protein_coding	cds	chr22-18529441-18529497	0	1.33702e-35	0.404912	0.297	0.1	2.76622e-30	open
CM vs HM	6 - NK + T	6a - CD4+ TN	chr11-692552-693535	ENST00000529717	DEAF1	ENSG00000177030	protein_coding	gap	chr11-691599-694678	0	4.40983e-27	0.444732	0.226	0.058	9.12373e-22	open
CM vs HM	6 - NK + T	6a - CD4+ TN	chr22-45341166-45342115	ENST00000216214	FAM118A	ENSG00000100376	protein_coding	utr	chr22-45340406-45341955	0	9.51071e-26	0.343465	0.111	0.016	1.96772e-20	open
CM vs HM	6 - NK + T	6a - CD4+ TN	chr10-30751568-30752544	ENST00000416310	RP11-14C22.6	ENSG00000230720	lincRNA	exon	chr10-30723419-30723740	27827	4.03463e-24	0.257307	0.05	0	8.34744e-19	open
CM vs HM	6 - NK + T	6a - CD4+ TN	chr9-39809189-39810297	ENST00000627065	GLIDR	ENSG00000278175	lincRNA	gap	chr9-39809616-39809730	0	6.40641e-22	-0.26518	0.024	0.091	1.32545e-16	closed
CM vs HM	6 - NK + T	6a - CD4+ TN	chr10-6606855-6607938	ENST00000625147	PRKCQ-AS1	ENSG00000237943	processed_transcript	gap	chr10-6596895-6608347	0	2.39063e-19	0.350882	0.137	0.031	4.94609e-14	open
CM vs HM	6 - NK + T	6a - CD4+ TN	chr17-7306777-7307800	ENST00000336452	EIF5A	ENSG00000132507	protein_coding	cds	chr17-7307047-7307115	0	2.02503e-18	-0.146778	0.473	0.531	4.18968e-13	closed
CM vs HM	6 - NK + T	6a - CD4+ TN	chr2-30162655-30163764	ENST00000402003	YPEL5	ENSG00000119801	protein_coding	utr	chr2-30158844-30160533	2121	2.46095e-18	0.315543	0.091	0.014	5.09158e-13	open
CM vs HM	6 - NK + T	6a - CD4+ TN	chr16-50338593-50339699	ENST00000475877	BRD7	ENSG00000166164	protein_coding	gap	chr16-50334896-50339975	0	2.60286e-18	-0.259069	0.019	0.082	5.38518e-13	closed
CM vs HM	6 - NK + T	6a - CD4+ TN	chr12-52585667-52586683	ENST00000537672	KRT72	ENSG00000170486	protein_coding	cds	chr12-52585982-52586172	0	8.07231e-18	0.347521	0.297	0.131	1.67012e-12	open
CM vs HM	6 - NK + T	6a - CD4+ TN	chr1-166988742-166989637	ENST00000447624	MAEL	ENSG00000143194	protein_coding	cds	chr1-166989353-166989484	0	1.03463e-17	-0.227216	0.003	0.038	2.14059e-12	closed
CM vs HM	6 - NK + T	6a - CD4+ TN	chr2-102227368-102228453	ENST00000481806	IL1RL2	ENSG00000115598	protein_coding	gap	chr2-102226042-102232962	0	1.97943e-17	0.292643	0.108	0.024	4.09534e-12	open
CM vs HM	6 - NK + T	6a - CD4+ TN	chr8-12436360-12437318	ENST00000262365	FAM86B2	ENSG00000145002	protein_coding	exon	chr8-12436248-12436343	16	3.03901e-17	0.323826	0.094	0.017	6.28757e-12	open
CM vs HM	6 - NK + T	6a - CD4+ TN	chr6-90458195-90459345	ENST00000369332	MAP3K7	ENSG00000135341	protein_coding	utr	chr6-90513573-90516500	54227	3.44203e-17	0.327556	0.08	0.011	7.1214e-12	open
CM vs HM	6 - NK + T	6a - CD4+ TN	GL000219.1-42149-43319	NA	NA	NA	NA	NA	NA	NA	3.81963e-17	0.297542	0.235	0.094	7.90263e-12	open
CM vs HM	6 - NK + T	6a - CD4+ TN	chr3-172517679-172518758	ENST00000494851	TNFSF10	ENSG00000121858	protein_coding	gap	chr3-172514999-172523252	0	7.04435e-16	0.342738	0.099	0.019	1.45744e-10	open
CM vs HM	6 - NK + T	6a - CD4+ TN	chrX-1452526-1453654	ENST00000381333	ASMTL	ENSG00000169093	protein_coding	cds	chrX-1452748-1452840	0	8.51048e-16	-0.148068	0.496	0.552	1.76078e-10	closed
CM vs HM	6 - NK + T	6a - CD4+ TN	chr17-45583057-45584098	ENST00000586348	RP11-798G7.6	ENSG00000267198	lincRNA	exon	chr17-45562646-45563230	19826	9.64072e-16	0.345407	0.214	0.077	1.99462e-10	open
CM vs HM	6 - NK + T	6a - CD4+ TN	chr12-15050285-15051326	ENST00000542689	LINC01489	ENSG00000255727	lincRNA	exon	chr12-15006361-15006683	43601	1.25506e-15	-0.242422	0.002	0.034	2.59665e-10	closed
CM vs HM	6 - NK + T	6a - CD4+ TN	chr16-1308618-1309967	ENST00000567383	UBE2I	ENSG00000103275	protein_coding	utr	chr16-1309656-1309773	0	4.49697e-15	-0.157289	0.293	0.337	9.304e-10	closed
CM vs HM	6 - NK + T	6a - CD4+ TN	chr14-75282640-75284684	ENST00000303562	FOS	ENSG00000170345	protein_coding	utr	chr14-75281425-75282230	409	5.24003e-15	0.324295	0.236	0.091	1.08414e-09	open
CM vs HM	6 - NK + T	6a - CD4+ TN	chr14-101760239-101761168	ENST00000422945	PPP2R5C	ENSG00000078304	protein_coding	exon	chr14-101761798-101761920	629	6.62091e-15	-0.145005	0.457	0.529	1.36983e-09	closed
CM vs HM	6 - NK + T	6a - CD4+ TN	chr7-143619748-143621485	ENST00000518791	TCAF2	ENSG00000170379	protein_coding	cds	chr7-143620955-143621020	0	8.7327e-15	-0.1837	0.003	0.035	1.80675e-09	closed
CM vs HM	6 - NK + T	6a - CD4+ TN	chr2-113234994-113236052	ENST00000465084	PAX8	ENSG00000125618	protein_coding	cds	chr2-113235394-113235443	0	9.87704e-15	0.222666	0.056	0.007	2.04351e-09	open
CM vs HM	6 - NK + T	6a - CD4+ TN	chr19-18271054-18271948	ENST00000612316	KIAA1683	ENSG00000130518	protein_coding	gap	chr19-18269588-18274402	0	1.17797e-14	0.303875	0.092	0.017	2.43717e-09	open
CM vs HM	6 - NK + T	6a - CD4+ TN	chr19-18274298-18275363	ENST00000612316	KIAA1683	ENSG00000130518	protein_coding	utr	chr19-18274403-18274509	0	2.09223e-14	0.29643	0.133	0.04	4.32872e-09	open
CM vs HM	6 - NK + T	6a - CD4+ TN	chr19-50724404-50725537	ENST00000617718	CLEC11A	ENSG00000105472	protein_coding	cds	chr19-50725316-50725467	0	6.2567e-14	-0.16939	0.185	0.237	1.29448e-08	closed
CM vs HM	6 - NK + T	6a - CD4+ TN	chr1-172449602-172451705	ENST00000488100	C1orf105	ENSG00000180999	protein_coding	gap	chr1-172448532-172456414	0	1.01542e-13	0.293808	0.107	0.025	2.10084e-08	open
CM vs HM	6 - NK + T	6a - CD4+ TN	chr7-1926590-1927555	ENST00000450235	MAD1L1	ENSG00000002822	protein_coding	gap	chr7-1898391-1936686	0	3.02617e-13	-0.181237	0.109	0.154	6.261e-08	closed
CM vs HM	6 - NK + T	6a - CD4+ TN	chr2-10880308-10881317	ENST00000607419	RP11-245G13.2	ENSG00000271952	lincRNA	gap	chr2-10878445-10884833	0	3.05654e-13	0.168519	0.027	0	6.32383e-08	open
CM vs HM	6 - NK + T	6a - CD4+ TN	chr2-136113002-136114092	ENST00000409817	CXCR4	ENSG00000121966	protein_coding	utr	chr2-136114349-136114868	256	3.47213e-13	0.29424	0.108	0.027	7.18367e-08	open
CM vs HM	6 - NK + T	6a - CD4+ TN	chr11-587622-588867	ENST00000534320	PHRF1	ENSG00000070047	protein_coding	gap	chr11-587465-591383	0	4.04537e-13	0.291565	0.22	0.085	8.36966e-08	open
CM vs HM	6 - NK + T	6a - CD4+ TN	chr19-18192565-18193565	ENST00000599612	MPV17L2	ENSG00000254858	protein_coding	cds	chr19-18193282-18193468	0	4.44466e-13	-0.128018	0.473	0.518	9.19578e-08	closed
CM vs HM	6 - NK + T	6a - CD4+ TN	chr20-30376603-30377694	ENST00000380888	LINC01597	ENSG00000205611	lincRNA	exon	chr20-30288271-30288479	88123	4.66938e-13	-0.160094	0.123	0.166	9.66071e-08	closed
CM vs HM	6 - NK + T	6a - CD4+ TN	chr19-39401011-39402129	ENST00000315588	MED29	ENSG00000063322	protein_coding	utr	chr19-39397700-39400637	373	5.80111e-13	0.245146	0.25	0.109	1.20022e-07	open
CM vs HM	6 - NK + T	6a - CD4+ TN	chr17-81860401-81861354	ENST00000576541	P4HB	ENSG00000185624	protein_coding	cds	chr17-81860327-81860471	0	6.37795e-13	-0.115719	0.506	0.534	1.31957e-07	closed
CM vs HM	6 - NK + T	6a - CD4+ TN	chr7-102671308-102672234	ENST00000476151	RP11-577H5.5	ENSG00000267645	protein_coding	cds	chr7-102671552-102671601	0	6.89807e-13	-0.223597	0.052	0.121	1.42718e-07	closed
CM vs HM	6 - NK + T	6a - CD4+ TN	chr3-195803929-195804979	ENST00000480843	MUC4	ENSG00000145113	protein_coding	gap	chr3-195791498-195811735	0	9.0741e-13	0.276959	0.069	0.011	1.87739e-07	open
CM vs HM	6 - NK + T	6a - CD4+ TN	chr19-6199182-6200327	ENST00000592883	RFX2	ENSG00000087903	protein_coding	utr	chr19-6199476-6199529	0	9.9751e-13	-0.151585	0.251	0.296	2.0638e-07	closed
CM vs HM	6 - NK + T	6a - CD4+ TN	chr22-45336692-45337821	ENST00000483102	FAM118A	ENSG00000100376	protein_coding	gap	chr22-45336412-45340385	0	1.21392e-12	0.212074	0.067	0.013	2.51153e-07	open
CM vs HM	6 - NK + T	6a - CD4+ TN	chr6-141483340-141484277	ENST00000565399	RP11-63E9.1	ENSG00000259828	lincRNA	exon	chr6-141447011-141451006	32333	1.48235e-12	-0.188901	0.119	0.172	3.06692e-07	closed
CM vs HM	6 - NK + T	6a - CD4+ TN	chr4-38949079-38950297	ENST00000358869	FAM114A1	ENSG00000197712	protein_coding	utr	chr4-38943558-38945739	3339	1.51574e-12	0.277852	0.163	0.06	3.13599e-07	open
CM vs HM	6 - NK + T	6a - CD4+ TN	chr19-45474868-45475979	ENST00000591858	FOSB	ENSG00000125740	protein_coding	utr	chr19-45473013-45475178	0	1.62946e-12	0.289273	0.184	0.068	3.37128e-07	open
CM vs HM	6 - NK + T	6a - CD4+ TN	chr14-63650067-63651114	ENST00000620835	CTD-2302E22.6	ENSG00000274015	lincRNA	exon	chr14-63642143-63642696	7370	1.68786e-12	-0.208635	0.1	0.155	3.49209e-07	closed
CM vs HM	6 - NK + T	6a - CD4+ TN	chr2-30171791-30173041	ENST00000402003	YPEL5	ENSG00000119801	protein_coding	utr	chr2-30158844-30160533	11257	1.75934e-12	0.245401	0.063	0.01	3.63998e-07	open
CM vs HM	6 - NK + T	6a - CD4+ TN	chr16-31695432-31696468	ENST00000563338	CTD-2358C21.3	ENSG00000260568	lincRNA	exon	chr16-31699676-31699954	3207	1.81901e-12	-0.2026	0.102	0.161	3.76343e-07	closed
CM vs HM	6 - NK + T	6a - CD4+ TN	chr1-101127896-101129329	ENST00000488789	DPH5	ENSG00000117543	protein_coding	exon	chr1-101025805-101026088	101807	1.93541e-12	0.27269	0.143	0.044	4.00427e-07	open
CM vs HM	6 - NK + T	6a - CD4+ TN	chr12-104695107-104696239	ENST00000549260	CHST11	ENSG00000171310	protein_coding	gap	chr12-104601992-104756948	0	2.43376e-12	-0.190421	0.035	0.079	5.03534e-07	closed
CM vs HM	6 - NK + T	6a - CD4+ TN	chr9-135907175-135908209	ENST00000409386	CAMSAP1	ENSG00000130559	protein_coding	utr	chr9-135907160-135907228	0	3.18476e-12	-0.140121	0.279	0.323	6.5891e-07	closed
CM vs HM	6 - NK + T	6a - CD4+ TN	chr16-970562-971542	ENST00000568964	LMF1	ENSG00000103227	protein_coding	cds	chr16-970788-970963	0	3.53966e-12	-0.130204	0.299	0.335	7.32338e-07	closed
CM vs HM	6 - NK + T	6a - CD4+ TN	chr12-9283130-9284365	ENST00000538219	RP11-118B22.4	ENSG00000256427	lincRNA	exon	chr12-9257923-9257960	25169	4.07401e-12	-0.179508	0.074	0.119	8.42891e-07	closed
CM vs HM	6 - NK + T	6a - CD4+ TN	chr13-20488914-20489835	ENST00000480748	CRYL1	ENSG00000165475	protein_coding	cds	chr13-20489370-20489436	0	4.09202e-12	0.207984	0.039	0.002	8.46618e-07	open
CM vs HM	6 - NK + T	6a - CD4+ TN	chr16-50334945-50335980	ENST00000475877	BRD7	ENSG00000166164	protein_coding	gap	chr16-50334896-50339975	0	4.19952e-12	-0.184753	0.029	0.075	8.68859e-07	closed
CM vs HM	6 - NK + T	6a - CD4+ TN	chr6-139290389-139291256	ENST00000358430	TXLNB	ENSG00000164440	protein_coding	gap	chr6-139288914-139291920	0	5.24368e-12	-0.20153	0.066	0.132	1.08489e-06	closed
CM vs HM	6 - NK + T	6a - CD4+ TN	chrX-1471368-1472592	ENST00000460672	P2RY8	ENSG00000182162	protein_coding	gap	chrX-1466583-1494092	0	6.08457e-12	0.246904	0.166	0.06	1.25887e-06	open
CM vs HM	6 - NK + T	6a - CD4+ TN	chr8-144465283-144466325	ENST00000533764	CYHR1	ENSG00000187954	protein_coding	utr	chr8-144465208-144465434	0	6.30606e-12	-0.132777	0.379	0.427	1.30469e-06	closed
CM vs HM	6 - NK + T	6a - CD4+ TN	chr16-31141951-31142942	ENST00000569305	PRSS36	ENSG00000178226	protein_coding	cds	chr16-31142737-31142993	0	7.41396e-12	-0.137354	0.354	0.397	1.53391e-06	closed
CM vs HM	6 - NK + T	6a - CD4+ TN	chr6-42048308-42049406	ENST00000616010	CCND3	ENSG00000112576	protein_coding	utr	chr6-42048501-42048894	0	1.33628e-11	-0.157917	0.17	0.214	2.76469e-06	closed
CM vs HM	6 - NK + T	6a - CD4+ TN	chr6-42045395-42046604	ENST00000616010	CCND3	ENSG00000112576	protein_coding	gap	chr6-42030191-42048500	0	1.56032e-11	-0.16928	0.211	0.265	3.22823e-06	closed
CM vs HM	6 - NK + T	6a - CD4+ TN	chr5-96702296-96703809	ENST00000511782	CAST	ENSG00000153113	protein_coding	utr	chr5-96702806-96702915	0	2.25475e-11	0.255803	0.261	0.131	4.66497e-06	open
CM vs HM	6 - NK + T	6a - CD4+ TN	chr16-4253509-4254599	ENST00000573268	LINC01569	ENSG00000262468	lincRNA	gap	chr16-4248429-4253646	0	2.28565e-11	-0.113034	0.462	0.484	4.72889e-06	closed
CM vs HM	6 - NK + T	6a - CD4+ TN	chr19-29837169-29838215	ENST00000357943	CCNE1	ENSG00000105173	protein_coding	utr	chr19-29823778-29824308	12860	2.34165e-11	-0.166267	0.052	0.089	4.84476e-06	closed
CM vs HM	6 - NK + T	6a - CD4+ TN	chr9-177963-179655	ENST00000616944	CBWD1	ENSG00000172785	protein_coding	cds	chr9-178816-178969	0	2.36412e-11	-0.175077	0.013	0.049	4.89125e-06	closed
CM vs HM	6 - NK + T	6a - CD4+ TN	chr9-128551874-128552927	ENST00000636257	SPTAN1	ENSG00000197694	protein_coding	utr	chr9-128552746-128552805	0	3.67138e-11	-0.12436	0.304	0.333	7.59591e-06	closed
CM vs HM	6 - NK + T	6a - CD4+ TN	chr1-9425921-9427006	ENST00000517147	RNA5SP40	ENSG00000252956	rRNA	exon	chr1-9437669-9437778	10662	3.75565e-11	0.259552	0.255	0.124	7.77025e-06	open
CM vs HM	6 - NK + T	6a - CD4+ TN	chr20-35741961-35742946	ENST00000528062	RBM39	ENSG00000131051	protein_coding	utr	chr20-35741941-35742238	0	4.13283e-11	-0.117492	0.445	0.48	8.55061e-06	closed
CM vs HM	6 - NK + T	6a - CD4+ TN	chr19-7903264-7904304	ENST00000397983	MAP2K7	ENSG00000076984	protein_coding	cds	chr19-7903945-7904068	0	4.43888e-11	-0.112766	0.342	0.362	9.18381e-06	closed
CM vs HM	6 - NK + T	6a - CD4+ TN	chr6-24546931-24547984	ENST00000616673	KIAA0319	ENSG00000137261	protein_coding	cds	chr6-24547165-24547343	0	4.63278e-11	0.199395	0.044	0.007	9.58499e-06	open
CM vs HM	6 - NK + T	6a - CD4+ TN	chr2-28613830-28614828	ENST00000444257	PLB1	ENSG00000163803	protein_coding	cds	chr2-28614031-28614096	0	5.88807e-11	0.28602	0.097	0.027	1.21821e-05	open
CM vs HM	6 - NK + T	6a - CD4+ TN	chr1-154558175-154559344	ENST00000292211	UBE2Q1	ENSG00000160714	protein_coding	cds	chr1-154558227-154558553	0	6.47543e-11	-0.116285	0.441	0.481	1.33973e-05	closed
CM vs HM	6 - NK + T	6a - CD4+ TN	chr19-1490046-1491505	ENST00000591201	PCSK4	ENSG00000115257	protein_coding	cds	chr19-1490158-1490335	0	6.61673e-11	-0.115451	0.452	0.485	1.36897e-05	closed
CM vs HM	6 - NK + T	6a - CD4+ TN	chr1-192516319-192517627	ENST00000457321	RP5-1011O1.3	ENSG00000236069	lincRNA	exon	chr1-192529579-192529715	11951	7.04185e-11	0.235558	0.278	0.144	1.45692e-05	open
CM vs HM	6 - NK + T	6a - CD4+ TN	chr19-4471450-4472735	ENST00000621835	CTB-50L17.10	ENSG00000167674	protein_coding	cds	chr19-4472351-4472422	0	7.32282e-11	-0.10614	0.577	0.614	1.51505e-05	closed
CM vs HM	6 - NK + T	6a - CD4+ TN	chr6-116461629-116462647	ENST00000368605	FAM26F	ENSG00000188820	protein_coding	cds	chr6-116461930-116462454	0	7.499e-11	-0.156846	0.023	0.06	1.5515e-05	closed
CM vs HM	6 - NK + T	6a - CD4+ TN	chr1-203277696-203278874	ENST00000460619	CHIT1	ENSG00000133063	protein_coding	exon	chr1-203273376-203273641	4054	7.60218e-11	0.270817	0.129	0.045	1.57285e-05	open
CM vs HM	6 - NK + T	6a - CD4+ TN	chr17-32518955-32520959	ENST00000577352	MYO1D	ENSG00000176658	protein_coding	gap	chr17-32494916-32605086	0	7.62623e-11	0.249361	0.157	0.057	1.57783e-05	open
CM vs HM	6 - NK + T	6a - CD4+ TN	chr17-59898744-59899766	ENST00000489824	RPS6KB1	ENSG00000108443	protein_coding	gap	chr17-59893925-59910561	0	8.19552e-11	-0.189955	0.02	0.058	1.69561e-05	closed
CM vs HM	6 - NK + T	6a - CD4+ TN	chr13-108306417-108307627	ENST00000430559	TNFSF13B	ENSG00000102524	protein_coding	cds	chr13-108306826-108306938	0	8.4326e-11	0.242665	0.062	0.011	1.74466e-05	open
CM vs HM	6 - NK + T	6a - CD4+ TN	chr19-18277160-18278159	ENST00000252818	JUND	ENSG00000130522	protein_coding	utr	chr19-18279760-18280440	1600	1.44596e-10	0.257702	0.145	0.056	2.99163e-05	open
CM vs HM	6 - NK + T	6a - CD4+ TN	chr9-125240978-125241950	ENST00000324460	HSPA5	ENSG00000044574	protein_coding	cds	chr9-125241005-125241126	0	1.47615e-10	-0.111927	0.363	0.398	3.05409e-05	closed
CM vs HM	6 - NK + T	6a - CD4+ TN	chr6-142232049-142233102	ENST00000367630	VTA1	ENSG00000009844	protein_coding	utr	chr6-142218644-142224689	7359	1.49069e-10	0.229754	0.135	0.051	3.08417e-05	open
CM vs HM	6 - NK + T	6a - CD4+ TN	chr19-1094892-1096129	ENST00000619917	POLR2E	ENSG00000099817	protein_coding	cds	chr19-1095259-1095315	0	1.50427e-10	-0.134296	0.224	0.266	3.11227e-05	closed
CM vs HM	6 - NK + T	6a - CD4+ TN	chr6-26157534-26158486	ENST00000377777	HIST1H2BD	ENSG00000158373	protein_coding	cds	chr6-26158170-26158550	0	1.74421e-10	-0.123657	0.34	0.364	3.60868e-05	closed
CM vs HM	6 - NK + T	6a - CD4+ TN	chr1-628755-630979	ENST00000635509	RP5-857K21.4	ENSG00000230021	lincRNA	gap	chr1-601578-711710	0	1.90464e-10	-0.249833	0.042	0.112	3.94061e-05	closed
CM vs HM	6 - NK + T	6a - CD4+ TN	chr7-36784606-36785576	ENST00000415356	AC007349.5	ENSG00000235728	lincRNA	exon	chr7-36782064-36782789	1816	2.077e-10	0.224933	0.2	0.085	4.29721e-05	open
CM vs HM	6 - NK + T	6a - CD4+ TN	chr14-75274505-75275494	ENST00000303562	FOS	ENSG00000170345	protein_coding	exon	chr14-75278774-75279123	3279	2.23886e-10	0.20163	0.111	0.035	4.63209e-05	open
CM vs HM	6 - NK + T	6a - CD4+ TN	chr14-22561473-22562430	ENST00000557595	AE000662.92	ENSG00000259003	lincRNA	exon	chr14-22558727-22559037	2435	2.36845e-10	-0.131768	0.256	0.294	4.9002e-05	closed
CM vs HM	6 - NK + T	6a - CD4+ TN	chr14-105293880-105295035	ENST00000619151	BRF1	ENSG00000185024	protein_coding	gap	chr14-105286377-105300445	0	2.37027e-10	0.248012	0.136	0.048	4.90396e-05	open
CM vs HM	6 - NK + T	6a - CD4+ TN	chr8-144412754-144413858	ENST00000301305	SLC39A4	ENSG00000147804	protein_coding	cds	chr8-144413750-144413881	0	2.3747e-10	-0.134289	0.275	0.32	4.91314e-05	closed
CM vs HM	6 - NK + T	6a - CD4+ TN	chr10-102641792-102642739	ENST00000607967	RP11-47A8.5	ENSG00000272933	lincRNA	exon	chr10-102642792-102644140	52	2.4018e-10	-0.122064	0.288	0.317	4.9692e-05	closed
CM vs HM	6 - NK + T	6a - CD4+ TN	chr3-42600017-42601023	ENST00000445842	NKTR	ENSG00000114857	protein_coding	cds	chr3-42601007-42601064	0	2.40692e-10	-0.115301	0.415	0.442	4.9798e-05	closed
CM vs HM	6 - NK + T	6a - CD4+ TN	chr1-19687775-19689077	ENST00000489814	TMCO4	ENSG00000162542	protein_coding	gap	chr1-19683445-19694433	0	2.46294e-10	0.184573	0.056	0.011	5.0957e-05	open
CM vs HM	6 - NK + T	6a - CD4+ TN	chr4-1346613-1347969	ENST00000511216	UVSSA	ENSG00000163945	protein_coding	utr	chr4-1347266-1347609	0	2.66652e-10	-0.112074	0.42	0.458	5.51689e-05	closed
CM vs HM	6 - NK + T	6a - CD4+ TN	chr1-204452732-204453852	ENST00000424712	PIK3C2B	ENSG00000133056	protein_coding	gap	chr1-204450018-204454668	0	2.78761e-10	-0.144007	0.033	0.068	5.76743e-05	closed
CM vs HM	6 - NK + T	6a - CD4+ TN	chr4-145481343-145483365	ENST00000515385	SMAD1	ENSG00000170365	protein_coding	utr	chr4-145482811-145483176	0	2.81185e-10	0.216731	0.082	0.02	5.81758e-05	open
CM vs HM	6 - NK + T	6a - CD4+ TN	chr19-40750230-40751329	ENST00000601545	SNRPA	ENSG00000077312	protein_coding	utr	chr19-40750637-40750701	0	3.09055e-10	-0.102493	0.486	0.507	6.39418e-05	closed
CM vs HM	6 - NK + T	6a - CD4+ TN	chr14-50396153-50397511	ENST00000216378	CDKL1	ENSG00000100490	protein_coding	utr	chr14-50397218-50397404	0	3.23144e-10	0.253565	0.11	0.034	6.68568e-05	open
CM vs HM	6 - NK + T	6a - CD4+ TN	chr19-10653567-10654534	ENST00000589998	ILF3	ENSG00000129351	protein_coding	utr	chr19-10654361-10654487	0	3.25779e-10	-0.0979072	0.506	0.525	6.7402e-05	closed
CM vs HM	6 - NK + T	6a - CD4+ TN	chr19-41936236-41937176	ENST00000599589	ARHGEF1	ENSG00000076928	protein_coding	utr	chr19-41929655-41930150	6085	3.37026e-10	0.138598	0.037	0.004	6.97289e-05	open
CM vs HM	6 - NK + T	6a - CD4+ TN	chr17-7841156-7843167	ENST00000571047	KDM6B	ENSG00000132510	protein_coding	gap	chr17-7840371-7844900	0	3.48112e-10	0.19517	0.494	0.341	7.20226e-05	open
CM vs HM	6 - NK + T	6a - CD4+ TN	chr17-57045516-57047464	ENST00000576871	RP11-166P13.3	ENSG00000263004	lincRNA	exon	chr17-57078298-57078703	30833	5.95086e-10	0.228099	0.061	0.011	0.00012312	open
CM vs HM	6 - NK + T	6a - CD4+ TN	chr22-39319255-39320212	ENST00000427905	RPL3	ENSG00000100316	protein_coding	cds	chr22-39319499-39319595	0	6.36733e-10	-0.110848	0.35	0.382	0.000131737	closed
CM vs HM	6 - NK + T	6a - CD4+ TN	chr2-96838948-96840071	ENST00000418232	ANKRD23	ENSG00000163126	protein_coding	cds	chr2-96839997-96840095	0	7.13733e-10	-0.139532	0.121	0.157	0.000147668	closed
CM vs HM	6 - NK + T	6a - CD4+ TN	chr2-241881160-241882305	ENST00000457686	LINC01237	ENSG00000233806	processed_transcript	gap	chr2-241881475-241882559	0	7.80464e-10	-0.121757	0.439	0.485	0.000161474	closed
CM vs HM	6 - NK + T	6a - CD4+ TN	chr20-48768985-48770084	ENST00000371941	PREX1	ENSG00000124126	protein_coding	gap	chr20-48747881-48827641	0	7.80676e-10	0.194855	0.181	0.076	0.000161518	open
CM vs HM	6 - NK + T	6a - CD4+ TN	chr15-38671457-38672419	ENST00000560203	RP11-275I4.2	ENSG00000259747	lincRNA	gap	chr15-38671941-38688893	0	7.93302e-10	-0.163308	0.056	0.096	0.00016413	closed
CM vs HM	6 - NK + T	6a - CD4+ TN	chr13-73715195-73716273	ENST00000377669	KLF12	ENSG00000118922	protein_coding	cds	chr13-73715368-73715525	0	9.0393e-10	0.264554	0.222	0.102	0.000187019	open
CM vs HM	6 - NK + T	6a - CD4+ TN	chr2-24792699-24793784	ENST00000473706	CENPO	ENSG00000138092	protein_coding	cds	chr2-24793474-24793501	0	9.03931e-10	-0.114455	0.296	0.327	0.000187019	closed
CM vs HM	6 - NK + T	6a - CD4+ TN	chr7-134669428-134670602	ENST00000418040	BPGM	ENSG00000172331	protein_coding	gap	chr7-134662109-134678852	0	9.96327e-10	0.256458	0.249	0.126	0.000206135	open
CM vs HM	6 - NK + T	6a - CD4+ TN	chr7-42227382-42228486	ENST00000448703	GLI3	ENSG00000106571	protein_coding	utr	chr7-42227651-42227721	0	1.00655e-09	0.154626	0.034	0.003	0.00020825	open
CM vs HM	6 - NK + T	6a - CD4+ TN	chr19-41225200-41227082	ENST00000593513	AXL	ENSG00000167601	protein_coding	utr	chr19-41226755-41226912	0	1.02856e-09	0.245406	0.098	0.028	0.000212804	open
CM vs HM	6 - NK + T	6a - CD4+ TN	chr17-79996678-79997712	ENST00000310924	TBC1D16	ENSG00000167291	protein_coding	gap	chr17-79952819-80010159	0	1.09673e-09	-0.128441	0.202	0.24	0.000226907	closed
CM vs HM	6 - NK + T	6a - CD4+ TN	chr17-82292412-82293503	ENST00000581489	RP13-516M14.4	ENSG00000265692	lincRNA	gap	chr17-82291564-82292522	0	1.16648e-09	-0.119851	0.257	0.28	0.000241339	closed
CM vs HM	6 - NK + T	6a - CD4+ TN	chr19-52569679-52570770	ENST00000596514	ZNF701	ENSG00000167562	protein_coding	utr	chr19-52570273-52570330	0	1.36619e-09	-0.13226	0.253	0.292	0.000282658	closed
CM vs HM	6 - NK + T	6a - CD4+ TN	chr11-61962948-61964089	ENST00000449131	BEST1	ENSG00000167995	protein_coding	cds	chr11-61962255-61963149	0	1.3683e-09	0.255651	0.118	0.038	0.000283095	open
CM vs HM	6 - NK + T	6a - CD4+ TN	chr14-24141192-24142148	ENST00000560600	EMC9	ENSG00000100908	protein_coding	cds	chr14-24141107-24141304	0	1.37405e-09	-0.106022	0.403	0.422	0.000284284	closed
CM vs HM	6 - NK + T	6a - CD4+ TN	chr11-96463568-96465485	ENST00000546177	JRKL	ENSG00000183340	protein_coding	gap	chr11-96404392-96507036	0	1.38849e-09	0.249349	0.091	0.026	0.000287272	open
CM vs HM	6 - NK + T	6a - CD4+ TN	chr6-164039635-164040744	ENST00000564697	RP1-155D22.2	ENSG00000260422	lincRNA	exon	chr6-164084023-164085661	43278	1.43915e-09	-0.158962	0.011	0.038	0.000297754	closed
CM vs HM	6 - NK + T	6a - CD4+ TN	chr17-28951110-28952043	ENST00000584685	PHF12	ENSG00000109118	protein_coding	cds	chr17-28951467-28951604	0	1.57175e-09	-0.114971	0.354	0.393	0.000325186	closed
CM vs HM	6 - NK + T	6a - CD4+ TN	chr3-49411717-49412698	ENST00000273590	TCTA	ENSG00000145022	protein_coding	cds	chr3-49412427-49412640	0	1.61675e-09	-0.108965	0.429	0.464	0.000334497	closed
CM vs HM	6 - NK + T	6a - CD4+ TN	chr9-136790625-136791576	ENST00000456614	RP11-216L13.17	ENSG00000272896	protein_coding	cds	chr9-136791379-136791424	0	1.63514e-09	-0.108133	0.53	0.573	0.000338303	closed
CM vs HM	6 - NK + T	6a - CD4+ TN	chr1-2255271-2256452	ENST00000508416	SKI	ENSG00000157933	protein_coding	gap	chr1-2232670-2302977	0	1.66134e-09	-0.11944	0.255	0.296	0.000343723	closed
CM vs HM	6 - NK + T	6a - CD4+ TN	chr5-50489182-50490177	ENST00000506190	EMB	ENSG00000170571	protein_coding	exon	chr5-50443190-50443248	45933	1.75488e-09	-0.149575	0.006	0.028	0.000363076	closed
CM vs HM	6 - NK + T	6a - CD4+ TN	chr2-218567829-218568935	ENST00000627282	CNOT9	ENSG00000144580	protein_coding	utr	chr2-218568580-218568954	0	1.80871e-09	-0.102625	0.465	0.493	0.000374213	closed
CM vs HM	6 - NK + T	6a - CD4+ TN	chr16-11783200-11784256	ENST00000576018	ZC3H7A	ENSG00000122299	protein_coding	gap	chr16-11782389-11796218	0	1.82096e-09	-0.146375	0.145	0.183	0.000376747	closed
CM vs HM	6 - NK + T	6a - CD4+ TN	chr17-40287164-40288193	ENST00000580824	CDC6	ENSG00000094804	protein_coding	utr	chr17-40287902-40288037	0	1.91083e-09	-0.0990173	0.33	0.352	0.00039534	closed
CM vs HM	6 - NK + T	6a - CD4+ TN	chr1-153633613-153634636	ENST00000614256	CHTOP	ENSG00000160679	protein_coding	utr	chr1-153633982-153634343	0	1.94309e-09	-0.122601	0.307	0.341	0.000402015	closed
CM vs HM	6 - NK + T	6a - CD4+ TN	chr15-78072211-78073210	ENST00000409931	TBC1D2B	ENSG00000167202	protein_coding	gap	chr15-78054188-78077292	0	1.98023e-09	0.305445	0.146	0.055	0.000409699	open
CM vs HM	6 - NK + T	6a - CD4+ TN	chr18-48928529-48929585	ENST00000591805	SMAD7	ENSG00000101665	protein_coding	gap	chr18-48921911-48942480	0	2.00462e-09	0.213393	0.129	0.045	0.000414745	open
CM vs HM	6 - NK + T	6a - CD4+ TN	chr22-23984152-23985138	ENST00000404092	DDT	ENSG00000099977	protein_coding	exon	chr22-23980412-23980469	3682	2.04702e-09	-0.150795	0.005	0.03	0.000423518	closed
CM vs HM	6 - NK + T	6a - CD4+ TN	chr19-35712591-35713879	ENST00000481182	ZBTB32	ENSG00000011590	protein_coding	utr	chr19-35713433-35713454	0	2.34391e-09	0.20396	0.071	0.019	0.000484944	open
CM vs HM	6 - NK + T	6a - CD4+ TN	chr6-35731393-35732353	ENST00000536438	FKBP5	ENSG00000096060	protein_coding	exon	chr6-35728508-35728583	2809	2.36686e-09	-0.112084	0.305	0.329	0.000489692	closed
CM vs HM	6 - NK + T	6a - CD4+ TN	chr14-97993831-97994831	ENST00000499006	LINC01550	ENSG00000246223	lincRNA	exon	chr14-97977977-97978124	15706	2.50435e-09	-0.161573	0.093	0.131	0.000518137	closed
CM vs HM	6 - NK + T	6a - CD4+ TN	chr19-4401999-4403087	ENST00000585854	CHAF1A	ENSG00000167670	protein_coding	cds	chr19-4402763-4402814	0	2.55152e-09	-0.11109	0.326	0.356	0.000527898	closed
CM vs HM	6 - NK + T	6a - CD4+ TN	chr2-174729625-174730748	ENST00000348749	CHRNA1	ENSG00000138435	protein_coding	utr	chr2-174747592-174748123	16843	2.57612e-09	0.23692	0.093	0.032	0.000532986	open
CM vs HM	6 - NK + T	6a - CD4+ TN	chr19-5719806-5720861	ENST00000593119	LONP1	ENSG00000196365	protein_coding	cds	chr19-5720009-5720132	0	2.58814e-09	-0.0921701	0.452	0.465	0.000535474	closed
CM vs HM	6 - NK + T	6a - CD4+ TN	chr7-100428212-100429606	ENST00000472716	ZCWPW1	ENSG00000078487	protein_coding	utr	chr7-100428568-100428792	0	2.68864e-09	-0.0899006	0.548	0.571	0.000556266	closed
CM vs HM	6 - NK + T	6a - CD4+ TN	chr19-17488572-17489696	ENST00000599380	SLC27A1	ENSG00000130304	protein_coding	cds	chr19-17488848-17488901	0	2.73452e-09	0.187383	0.064	0.012	0.000565758	open
CM vs HM	6 - NK + T	6a - CD4+ TN	chr19-10870719-10872004	ENST00000590699	CARM1	ENSG00000142453	protein_coding	cds	chr19-10871703-10871922	0	2.79466e-09	-0.100043	0.514	0.556	0.000578201	closed
CM vs HM	6 - NK + T	6a - CD4+ TN	chr16-30370315-30371576	ENST00000563718	MYLPF	ENSG00000180209	protein_coding	utr	chr16-30370934-30371004	0	2.96816e-09	-0.0909188	0.542	0.565	0.000614098	closed
CM vs HM	6 - NK + T	6a - CD4+ TN	chr13-99433990-99435159	ENST00000494576	UBAC2	ENSG00000134882	protein_coding	exon	chr13-99385228-99386434	47555	3.08227e-09	0.23943	0.311	0.18	0.000637706	open
CM vs HM	6 - NK + T	6a - CD4+ TN	chr1-6784751-6785899	ENST00000557126	CAMTA1	ENSG00000171735	protein_coding	cds	chr1-6785531-6785575	0	3.12005e-09	-0.0947663	0.504	0.528	0.000645522	closed
CM vs HM	6 - NK + T	6a - CD4+ TN	chr11-66420918-66422354	ENST00000525148	NPAS4	ENSG00000174576	protein_coding	cds	chr11-66422120-66422271	0	3.51457e-09	-0.130658	0.135	0.168	0.000727146	closed
CM vs HM	6 - NK + T	6a - CD4+ TN	chr2-224585085-224586043	ENST00000344951	CUL3	ENSG00000036257	protein_coding	utr	chr2-224585010-224585397	0	3.54616e-09	-0.0994946	0.458	0.465	0.000733684	closed
CM vs HM	6 - NK + T	6a - CD4+ TN	chr19-45178008-45178963	ENST00000592647	TRAPPC6A	ENSG00000007255	protein_coding	cds	chr19-45178093-45178218	0	3.58724e-09	-0.0872917	0.583	0.615	0.000742182	closed
CM vs HM	6 - NK + T	6a - CD4+ TN	chr7-3120240-3121228	ENST00000458648	AC091801.1	ENSG00000217455	lincRNA	exon	chr7-3140234-3140296	19005	3.60953e-09	-0.179821	0.029	0.066	0.000746794	closed
CM vs HM	6 - NK + T	6a - CD4+ TN	chr1-192578992-192579862	ENST00000367459	RGS1	ENSG00000090104	protein_coding	cds	chr1-192579137-192579322	0	3.96103e-09	0.127667	0.029	0.003	0.000819518	open
CM vs HM	6 - NK + T	6a - CD4+ TN	KI270713.1-21334-22393	NA	NA	NA	NA	NA	NA	NA	4.02844e-09	-0.109442	0.293	0.316	0.000833465	closed
CM vs HM	6 - NK + T	6a - CD4+ TN	chr19-1881813-1883100	ENST00000292577	ABHD17A	ENSG00000129968	protein_coding	gap	chr19-1881805-1885351	0	4.04288e-09	0.235559	0.248	0.121	0.000836452	open
CM vs HM	6 - NK + T	6a - CD4+ TN	chr9-137240615-137241547	ENST00000340384	TUBB4B	ENSG00000188229	protein_coding	cds	chr9-137241361-137241417	0	4.25444e-09	-0.0938535	0.436	0.447	0.000880222	closed
CM vs HM	6 - NK + T	6a - CD4+ TN	chr1-633516-634634	ENST00000635509	RP5-857K21.4	ENSG00000230021	lincRNA	gap	chr1-601578-711710	0	4.31317e-09	-0.234674	0.066	0.131	0.000892373	closed
CM vs HM	6 - NK + T	6a - CD4+ TN	chr19-48332593-48333479	ENST00000435956	TMEM143	ENSG00000161558	protein_coding	cds	chr19-48333219-48333433	0	4.52179e-09	-0.113503	0.399	0.427	0.000935536	closed
CM vs HM	6 - NK + T	6a - CD4+ TN	chr1-48471742-48472699	ENST00000487543	SPATA6	ENSG00000132122	protein_coding	cds	chr1-48471958-48472008	0	4.60616e-09	-0.11434	0.237	0.259	0.000952992	closed
CM vs HM	6 - NK + T	6a - CD4+ TN	chr12-121686591-121687610	ENST00000542364	MORN3	ENSG00000139714	protein_coding	exon	chr12-121672579-121672631	13959	4.86847e-09	-0.107079	0.293	0.311	0.00100726	closed
CM vs HM	6 - NK + T	6a - CD4+ TN	chr4-180394104-180395102	ENST00000506917	RP11-460H9.1	ENSG00000249883	lincRNA	exon	chr4-180731164-180731348	336061	5.23669e-09	-0.0924353	0	0.014	0.00108345	closed
CM vs HM	6 - NK + T	6a - CD4+ TN	chr11-65121780-65122843	ENST00000534078	MRPL49	ENSG00000149792	protein_coding	cds	chr11-65122347-65122424	0	5.58024e-09	-0.108799	0.311	0.335	0.00115452	closed
CM vs HM	6 - NK + T	6a - CD4+ TN	chr2-121699106-121700173	ENST00000285814	NIFK	ENSG00000155438	protein_coding	utr	chr2-121726945-121727723	26771	5.97685e-09	0.154991	0.094	0.026	0.00123658	open
CM vs HM	6 - NK + T	6a - CD4+ TN	chr14-106268059-106269013	ENST00000618204	LINC00226	ENSG00000276210	lincRNA	exon	chr14-106287674-106287966	18660	6.50779e-09	-0.152285	0.131	0.161	0.00134643	closed
CM vs HM	6 - NK + T	6a - CD4+ TN	chr19-40442664-40443646	ENST00000599706	SERTAD3	ENSG00000167565	protein_coding	gap	chr19-40442087-40443854	0	6.52823e-09	-0.110105	0.327	0.357	0.00135066	closed
CM vs HM	6 - NK + T	6a - CD4+ TN	chr6-154732996-154734511	ENST00000417268	SCAF8	ENSG00000213079	protein_coding	cds	chr6-154733795-154733930	0	6.63328e-09	-0.0946901	0.368	0.381	0.00137239	closed
CM vs HM	6 - NK + T	6a - CD4+ TN	chr2-197231717-197232758	ENST00000463879	ANKRD44	ENSG00000065413	protein_coding	gap	chr2-197187107-197310577	0	6.65053e-09	-0.168635	0.015	0.043	0.00137596	closed
CM vs HM	6 - NK + T	6a - CD4+ TN	chr22-37608187-37609276	ENST00000449944	GGA1	ENSG00000100083	protein_coding	cds	chr22-37609136-37609154	0	6.81505e-09	-0.091885	0.418	0.429	0.00141	closed
CM vs HM	6 - NK + T	6a - CD4+ TN	chr11-4187081-4188127	ENST00000525365	RP11-23F23.2	ENSG00000254480	lincRNA	gap	chr11-4187205-4202258	0	6.94679e-09	0.246319	0.12	0.041	0.00143726	open
CM vs HM	6 - NK + T	6a - CD4+ TN	chr21-35428047-35429166	ENST00000475045	RUNX1	ENSG00000159216	protein_coding	gap	chr21-35065073-35461960	0	6.9946e-09	0.230391	0.091	0.026	0.00144715	open
CM vs HM	6 - NK + T	6a - CD4+ TN	chr19-16110909-16112128	ENST00000586682	RAB8A	ENSG00000167461	protein_coding	cds	chr19-16111902-16112025	0	7.05533e-09	-0.0942828	0.499	0.528	0.00145971	closed
CM vs HM	6 - NK + T	6a - CD4+ TN	chr6-150865209-150866889	ENST00000618312	MTHFD1L	ENSG00000120254	protein_coding	cds	chr6-150866359-150866387	0	7.28012e-09	0.225474	0.232	0.119	0.00150622	open
CM vs HM	6 - NK + T	6a - CD4+ TN	chr17-75854937-75856076	ENST00000626827	WBP2	ENSG00000132471	protein_coding	cds	chr17-75855239-75855297	0	7.30116e-09	-0.091863	0.429	0.448	0.00151057	closed
CM vs HM	6 - NK + T	6a - CD4+ TN	chr7-50147932-50148976	ENST00000297001	C7orf72	ENSG00000164500	protein_coding	gap	chr7-50141389-50151449	0	7.53636e-09	-0.156269	0.057	0.097	0.00155924	closed
CM vs HM	6 - NK + T	6a - CD4+ TN	chr1-207362932-207363965	ENST00000635614	CD55	ENSG00000196352	protein_coding	gap	chr1-207339418-207367369	0	7.63416e-09	0.222491	0.077	0.021	0.00157947	open
CM vs HM	6 - NK + T	6a - CD4+ TN	chr1-61452840-61454062	ENST00000493627	NFIA	ENSG00000162599	protein_coding	gap	chr1-61439519-61455302	0	8.00371e-09	0.216663	0.077	0.023	0.00165593	open
CM vs HM	6 - NK + T	6a - CD4+ TN	chr19-2950160-2951419	ENST00000588050	ZNF77	ENSG00000175691	protein_coding	exon	chr19-2944838-2944971	5188	8.66164e-09	-0.0924559	0.409	0.423	0.00179205	closed
CM vs HM	6 - NK + T	6a - CD4+ TN	chr19-18152347-18153334	ENST00000593731	AC007192.4	ENSG00000268173	protein_coding	utr	chr19-18153158-18153294	0	9.22459e-09	-0.0856585	0.456	0.468	0.00190852	closed
CM vs HM	6 - NK + T	6a - CD4+ TN	chr3-42347674-42348594	ENST00000287748	LYZL4	ENSG00000157093	protein_coding	utr	chr3-42397078-42397264	48483	9.23044e-09	0.150222	0.021	0	0.00190973	open
CM vs HM	6 - NK + T	6a - CD4+ TN	chr19-39445038-39446079	ENST00000601515	SUPT5H	ENSG00000196235	protein_coding	cds	chr19-39445891-39445965	0	9.28224e-09	-0.098081	0.326	0.35	0.00192045	closed
CM vs HM	6 - NK + T	6a - CD4+ TN	chr19-872465-873779	ENST00000607471	MED16	ENSG00000175221	protein_coding	cds	chr19-873449-873582	0	9.44229e-09	-0.141737	0.143	0.182	0.00195356	closed
CM vs HM	6 - NK + T	6a - CD4+ TN	chr6-33417763-33418717	ENST00000488478	CUTA	ENSG00000112514	protein_coding	cds	chr6-33417959-33418000	0	9.75846e-09	-0.0947695	0.484	0.498	0.00201898	closed
CM vs HM	6 - NK + T	6a - CD4+ TN	chr4-140095566-140096810	ENST00000509479	MAML3	ENSG00000196782	protein_coding	gap	chr4-139890968-140152859	0	9.82836e-09	0.25325	0.194	0.095	0.00203344	open
CM vs HM	6 - NK + T	6a - CD4+ TN	chr5-168291166-168292326	ENST00000521089	WWC1	ENSG00000113645	protein_coding	cds	chr5-168292153-168292271	0	9.92141e-09	-0.192562	0.035	0.078	0.00205269	closed
CM vs HM	6 - NK + T	6a - CD4+ TN	chr17-7239214-7240180	ENST00000613632	PHF23	ENSG00000040633	protein_coding	cds	chr17-7239246-7239279	0	1.00689e-08	-0.103963	0.296	0.321	0.0020832	closed
CM vs HM	6 - NK + T	6a - CD4+ TN	chr6-24948615-24949707	ENST00000510784	AL078584.1	ENSG00000283467	protein_coding	gap	chr6-24875818-25041850	0	1.0169e-08	-0.148943	0.104	0.142	0.00210391	closed
CM vs HM	6 - NK + T	6a - CD4+ TN	chr3-183789489-183790431	ENST00000432781	YEATS2	ENSG00000163872	protein_coding	gap	chr3-183786302-183790796	0	1.03002e-08	-0.158513	0.005	0.026	0.00213105	closed
CM vs HM	6 - NK + T	6a - CD4+ TN	chrX-55056819-55058256	ENST00000374974	PAGE2B	ENSG00000238269	protein_coding	exon	chrX-55075063-55075114	16806	1.03251e-08	0.221988	0.087	0.025	0.00213621	open
CM vs HM	6 - NK + T	6a - CD4+ TN	chr16-87853362-87854392	ENST00000565644	SLC7A5	ENSG00000103257	protein_coding	gap	chr16-87851850-87863589	0	1.04027e-08	0.175501	0.11	0.036	0.00215226	open
CM vs HM	6 - NK + T	6a - CD4+ TN	chr1-58812482-58813669	ENST00000419531	LINC01135	ENSG00000234807	lincRNA	gap	chr1-58785306-58893544	0	1.06697e-08	0.167712	0.059	0.015	0.00220751	open
CM vs HM	6 - NK + T	6a - CD4+ TN	chr17-50094750-50095885	ENST00000503176	PDK2	ENSG00000005882	protein_coding	cds	chr17-50095436-50095553	0	1.08595e-08	-0.102376	0.36	0.38	0.00224677	closed
CM vs HM	6 - NK + T	6a - CD4+ TN	chr1-66333459-66334421	ENST00000531025	PDE4B	ENSG00000184588	protein_coding	gap	chr1-66332621-66355526	0	1.10415e-08	0.204808	0.055	0.014	0.00228444	open
CM vs HM	6 - NK + T	6a - CD4+ TN	chr1-192538458-192540130	ENST00000457321	RP5-1011O1.3	ENSG00000236069	lincRNA	exon	chr1-192537754-192538102	355	1.18713e-08	0.224781	0.168	0.073	0.00245611	open
CM vs HM	6 - NK + T	6a - CD4+ TN	chr22-22797762-22798818	ENST00000526893	IGLL5	ENSG00000254709	protein_coding	exon	chr22-22887780-22888259	88961	1.18928e-08	0.117661	0.022	0.001	0.00246056	open
CM vs HM	6 - NK + T	6a - CD4+ TN	chr21-14121421-14122434	ENST00000614229	LIPI	ENSG00000188992	protein_coding	gap	chr21-14109081-14144622	0	1.22017e-08	-0.123021	0.001	0.017	0.00252448	closed
CM vs HM	6 - NK + T	6a - CD4+ TN	chr9-4596218-4597326	ENST00000461761	SPATA6L	ENSG00000106686	protein_coding	utr	chr9-4596435-4596530	0	1.28721e-08	-0.151413	0.14	0.175	0.00266317	closed
CM vs HM	6 - NK + T	6a - CD4+ TN	chr15-33194173-33195336	ENST00000616417	FMN1	ENSG00000248905	protein_coding	utr	chr15-33194578-33194733	0	1.34428e-08	-0.125945	0.209	0.242	0.00278124	closed
CM vs HM	6 - NK + T	6a - CD4+ TN	chr22-28882894-28885098	ENST00000544604	ZNRF3	ENSG00000183579	protein_coding	cds	chr22-28883767-28884066	0	1.35716e-08	-0.0940493	0.376	0.392	0.00280789	closed
CM vs HM	6 - NK + T	6a - CD4+ TN	chr17-21000830-21002186	ENST00000537526	USP22	ENSG00000124422	protein_coding	utr	chr17-20999597-21003030	0	1.44802e-08	0.178486	0.032	0.004	0.00299589	open
CM vs HM	6 - NK + T	6a - CD4+ TN	chr9-21413300-21414380	ENST00000613815	IFNA1	ENSG00000197919	protein_coding	gap	chr9-21409459-21440789	0	1.50526e-08	0.186743	0.037	0.006	0.0031143	open
CM vs HM	6 - NK + T	6a - CD4+ TN	chr6-31001420-31002363	ENST00000561890	MUC22	ENSG00000261272	protein_coding	exon	chr6-31010474-31010776	8110	1.51204e-08	0.160885	0.025	0.001	0.00312834	open
CM vs HM	6 - NK + T	6a - CD4+ TN	chr9-133335782-133336817	ENST00000372022	SURF6	ENSG00000148296	protein_coding	cds	chr9-133336039-133336132	0	1.5384e-08	-0.110855	0.232	0.259	0.00318286	closed
CM vs HM	6 - NK + T	6a - CD4+ TN	chr6-2940004-2941020	ENST00000380546	SERPINB6	ENSG00000124570	protein_coding	utr	chr6-2948159-2948297	7138	1.56899e-08	-0.114994	0.156	0.18	0.00324617	closed
CM vs HM	6 - NK + T	6a - CD4+ TN	chr9-129110353-129111590	ENST00000458362	CRAT	ENSG00000095321	protein_coding	cds	chr9-129110483-129110509	0	1.5711e-08	-0.0953158	0.362	0.385	0.00325052	closed
CM vs HM	6 - NK + T	6a - CD4+ TN	chr15-72117786-72118747	ENST00000569314	MYO9A	ENSG00000066933	protein_coding	utr	chr15-72118157-72118223	0	1.58388e-08	-0.0981682	0.413	0.431	0.00327697	closed
CM vs HM	6 - NK + T	6a - CD4+ TN	chr19-17074993-17076053	ENST00000601564	HAUS8	ENSG00000131351	protein_coding	cds	chr19-17075394-17075422	0	1.58395e-08	-0.0930195	0.429	0.456	0.00327712	closed
CM vs HM	6 - NK + T	6a - CD4+ TN	chr1-149887487-149888704	ENST00000331128	HIST2H2AB	ENSG00000184270	protein_coding	cds	chr1-149887524-149887916	0	1.65948e-08	-0.0998956	0.328	0.346	0.00343339	closed
CM vs HM	6 - NK + T	6a - CD4+ TN	chr9-128275483-128276645	ENST00000611957	GOLGA2	ENSG00000167110	protein_coding	cds	chr9-128275893-128275976	0	1.70782e-08	-0.0963133	0.373	0.397	0.0035334	closed
CM vs HM	6 - NK + T	6a - CD4+ TN	chr8-102528287-102529257	ENST00000523572	KB-1980E6.3	ENSG00000253633	lincRNA	gap	chr8-102528856-102529310	0	1.76098e-08	0.213691	0.141	0.055	0.00364338	open
CM vs HM	6 - NK + T	6a - CD4+ TN	chr20-543154-544351	ENST00000608066	CSNK2A1	ENSG00000101266	protein_coding	utr	chr20-543672-543729	0	1.76567e-08	-0.0922667	0.324	0.332	0.00365309	closed
CM vs HM	6 - NK + T	6a - CD4+ TN	chr18-13611923-13612957	ENST00000587757	LDLRAD4	ENSG00000168675	protein_coding	cds	chr18-13612705-13612774	0	1.785e-08	0.19807	0.147	0.065	0.00369308	open
CM vs HM	6 - NK + T	6a - CD4+ TN	chr9-20514326-20515382	ENST00000630269	MLLT3	ENSG00000171843	protein_coding	gap	chr9-20456787-20620653	0	1.80199e-08	0.271029	0.115	0.044	0.00372822	open
CM vs HM	6 - NK + T	6a - CD4+ TN	chr11-64304799-64306022	ENST00000539594	ESRRA	ENSG00000173153	protein_coding	utr	chr11-64305580-64305736	0	1.94254e-08	-0.100063	0.42	0.444	0.00401902	closed
CM vs HM	6 - NK + T	6a - CD4+ TN	chr7-5529470-5530339	ENST00000443528	ACTB	ENSG00000075624	protein_coding	cds	chr7-5529535-5529657	0	1.95459e-08	-0.101068	0.372	0.387	0.00404395	closed
CM vs HM	6 - NK + T	6a - CD4+ TN	chr21-44817282-44818448	ENST00000411651	SUMO3	ENSG00000184900	protein_coding	cds	chr21-44817948-44817968	0	1.9558e-08	-0.101698	0.311	0.334	0.00404645	closed
CM vs HM	6 - NK + T	6a - CD4+ TN	chr19-47514836-47515795	ENST00000601208	NAPA	ENSG00000105402	protein_coding	cds	chr19-47514843-47514940	0	1.96496e-08	-0.0797633	0.537	0.548	0.0040654	closed
CM vs HM	6 - NK + T	6a - CD4+ TN	chr11-64240806-64241874	ENST00000535135	FKBP2	ENSG00000173486	protein_coding	utr	chr11-64241666-64241994	0	1.98094e-08	-0.0845556	0.511	0.513	0.00409847	closed
CM vs HM	6 - NK + T	6a - CD4+ TN	chr13-43057426-43058404	ENST00000474320	DNAJC15	ENSG00000120675	protein_coding	gap	chr13-43023735-43065685	0	1.98552e-08	0.257625	0.176	0.078	0.00410793	open
CM vs HM	6 - NK + T	6a - CD4+ TN	chr15-74545844-74546926	ENST00000622429	ARID3B	ENSG00000179361	protein_coding	gap	chr15-74544489-74572861	0	2.16603e-08	0.256454	0.137	0.053	0.00448141	open
CM vs HM	6 - NK + T	6a - CD4+ TN	chr14-24114320-24115337	ENST00000561375	DCAF11	ENSG00000100897	protein_coding	utr	chr14-24114777-24114924	0	2.18612e-08	-0.0876585	0.589	0.608	0.00452296	closed
CM vs HM	6 - NK + T	6a - CD4+ TN	chr22-41381160-41382127	ENST00000266304	TEF	ENSG00000167074	protein_coding	cds	chr22-41382045-41382201	0	2.33736e-08	-0.0881913	0.437	0.442	0.00483587	closed
CM vs HM	6 - NK + T	6a - CD4+ TN	chr5-172767146-172768005	ENST00000239223	DUSP1	ENSG00000120129	protein_coding	utr	chr5-172768090-172768761	84	2.49698e-08	0.237684	0.159	0.068	0.00516613	open
CM vs HM	6 - NK + T	6a - CD4+ TN	chr19-49555631-49556659	ENST00000601015	NOSIP	ENSG00000142546	protein_coding	cds	chr19-49556317-49556425	0	2.53718e-08	-0.118474	0.188	0.211	0.0052493	closed
CM vs HM	6 - NK + T	6a - CD4+ TN	chr7-1159805-1160986	ENST00000401903	ZFAND2A	ENSG00000178381	protein_coding	utr	chr7-1159964-1160178	0	2.61728e-08	-0.102042	0.291	0.312	0.00541502	closed
CM vs HM	6 - NK + T	6a - CD4+ TN	chr22-50507484-50508504	ENST00000523045	NCAPH2	ENSG00000025770	protein_coding	cds	chr22-50508338-50508445	0	2.62407e-08	-0.0835433	0.401	0.417	0.00542908	closed
CM vs HM	6 - NK + T	6a - CD4+ TN	chr12-112012757-112013758	ENST00000552052	ERP29	ENSG00000089248	protein_coding	cds	chr12-112013480-112013609	0	2.62475e-08	-0.10116	0.425	0.452	0.00543048	closed
CM vs HM	6 - NK + T	6a - CD4+ TN	chr14-75280788-75281774	ENST00000555686	FOS	ENSG00000170345	protein_coding	cds	chr14-75280783-75281424	0	2.6479e-08	0.244074	0.184	0.09	0.00547837	open
CM vs HM	6 - NK + T	6a - CD4+ TN	chr14-68792798-68793775	ENST00000553375	ZFP36L1	ENSG00000185650	protein_coding	cds	chr14-68792882-68793070	0	2.69995e-08	-0.0945053	0.336	0.345	0.00558607	closed
CM vs HM	6 - NK + T	6a - CD4+ TN	chr18-50287415-50288428	ENST00000591474	CXXC1	ENSG00000154832	protein_coding	cds	chr18-50287587-50287589	0	2.74062e-08	-0.0996316	0.438	0.467	0.0056702	closed
CM vs HM	6 - NK + T	6a - CD4+ TN	chr17-82751297-82752317	ENST00000539345	TBCD	ENSG00000141556	protein_coding	cds	chr17-82752194-82752377	0	2.76056e-08	-0.0994827	0.273	0.295	0.00571147	closed
CM vs HM	6 - NK + T	6a - CD4+ TN	chr22-41468448-41469494	ENST00000396512	ACO2	ENSG00000100412	protein_coding	cds	chr22-41469147-41469182	0	2.78003e-08	-0.0922672	0.399	0.416	0.00575174	closed
CM vs HM	6 - NK + T	6a - CD4+ TN	chr1-44721221-44722351	ENST00000535358	C1orf228	ENSG00000198520	protein_coding	gap	chr1-44704174-44724121	0	2.81004e-08	-0.126377	0.111	0.145	0.00581384	closed
CM vs HM	6 - NK + T	6a - CD4+ TN	chr1-66335714-66336717	ENST00000531025	PDE4B	ENSG00000184588	protein_coding	gap	chr1-66332621-66355526	0	2.83843e-08	0.239967	0.33	0.18	0.00587257	open
CM vs HM	6 - NK + T	6a - CD4+ TN	chr4-83212121-83213084	ENST00000515670	RP11-576N17.5	ENSG00000250057	lincRNA	exon	chr4-83233512-83233657	20427	2.95963e-08	-0.132243	0.228	0.281	0.00612332	closed
CM vs HM	6 - NK + T	6a - CD4+ TN	chr3-183115744-183116795	ENST00000492597	MCCC1	ENSG00000078070	protein_coding	utr	chr3-183115474-183116075	0	2.97303e-08	-0.138827	0.029	0.055	0.00615104	closed
CM vs HM	6 - NK + T	6a - CD4+ TN	chr6-32971471-32972529	ENST00000496118	BRD2	ENSG00000204256	protein_coding	cds	chr6-32971595-32971976	0	3.03989e-08	-0.0896005	0.478	0.495	0.00628939	closed
CM vs HM	6 - NK + T	6a - CD4+ TN	chr2-231411950-231413157	ENST00000287590	B3GNT7	ENSG00000156966	protein_coding	utr	chr2-231398926-231401164	10785	3.05761e-08	0.180058	0.066	0.019	0.00632604	open
CM vs HM	6 - NK + T	6a - CD4+ TN	chr17-48024769-48025818	ENST00000583414	COPZ2	ENSG00000005243	protein_coding	utr	chr17-48026167-48026475	348	3.1569e-08	-0.104286	0.329	0.357	0.00653147	closed
CM vs HM	6 - NK + T	6a - CD4+ TN	chr2-231707910-231708837	ENST00000409683	PTMA	ENSG00000187514	protein_coding	cds	chr2-231708707-231708751	0	3.24198e-08	-0.0951726	0.482	0.494	0.0067075	closed
CM vs HM	6 - NK + T	6a - CD4+ TN	chr19-3035337-3036255	ENST00000591529	TLE2	ENSG00000065717	protein_coding	gap	chr19-3028804-3045725	0	3.29743e-08	-0.0901761	0.229	0.239	0.00682221	closed
CM vs HM	6 - NK + T	6a - CD4+ TN	chr14-21455774-21456723	ENST00000557364	CHD8	ENSG00000100888	protein_coding	utr	chr14-21456032-21456080	0	3.40919e-08	-0.0979136	0.457	0.477	0.00705344	closed
CM vs HM	6 - NK + T	6a - CD4+ TN	chr4-140060963-140061944	ENST00000509479	MAML3	ENSG00000196782	protein_coding	gap	chr4-139890968-140152859	0	3.49768e-08	0.247203	0.096	0.03	0.00723651	open
CM vs HM	6 - NK + T	6a - CD4+ TN	chr17-117982-118904	ENST00000624936	RP11-1228E12.2	ENSG00000280136	lincRNA	gap	chr17-106865-118382	0	3.52594e-08	0.13558	0.021	0	0.007295	open
CM vs HM	6 - NK + T	6a - CD4+ TN	chr19-3060851-3061988	ENST00000586742	AES	ENSG00000104964	protein_coding	cds	chr19-3061160-3061257	0	3.60859e-08	-0.128335	0.148	0.18	0.007466	closed
CM vs HM	6 - NK + T	6a - CD4+ TN	chr16-56860070-56861102	ENST00000438926	SLC12A3	ENSG00000070915	protein_coding	exon	chr16-56865207-56865517	4104	3.6684e-08	0.198677	0.065	0.015	0.00758974	open
CM vs HM	6 - NK + T	6a - CD4+ TN	chr19-53103057-53104002	ENST00000599637	ZNF160	ENSG00000170949	protein_coding	utr	chr19-53103265-53103436	0	3.76496e-08	-0.0995269	0.33	0.357	0.00778951	closed
CM vs HM	6 - NK + T	6a - CD4+ TN	chr15-99106188-99107131	ENST00000594047	SYNM	ENSG00000182253	protein_coding	gap	chr15-99106010-99113590	0	3.80273e-08	0.190826	0.053	0.01	0.00786766	open
CM vs HM	6 - NK + T	6a - CD4+ TN	chr19-18557297-18558247	ENST00000601630	KXD1	ENSG00000105700	protein_coding	utr	chr19-18557876-18557914	0	3.81177e-08	-0.102638	0.247	0.266	0.00788636	closed
CM vs HM	6 - NK + T	6a - CD4+ TN	chr16-4307271-4308330	ENST00000262366	GLIS2	ENSG00000126603	protein_coding	exon	chr16-4314761-4315455	6430	3.89945e-08	-0.0846262	0.364	0.38	0.00806777	closed
CM vs HM	6 - NK + T	6a - CD4+ TN	chr3-151183017-151184069	ENST00000474524	MED12L	ENSG00000144893	protein_coding	gap	chr3-151165983-151185329	0	3.95001e-08	-0.133545	0.026	0.052	0.00817237	closed
CM vs HM	6 - NK + T	6a - CD4+ TN	chr3-195954076-195955099	ENST00000570130	RP11-480A16.1	ENSG00000260261	lincRNA	exon	chr3-195949188-195952695	1380	3.96046e-08	0.200623	0.068	0.018	0.00819399	open
CM vs HM	6 - NK + T	6a - CD4+ TN	chr12-57520195-57521154	ENST00000552740	DDIT3	ENSG00000175197	protein_coding	utr	chr12-57520418-57520511	0	4.12e-08	-0.0888327	0.397	0.421	0.00852407	closed
CM vs HM	6 - NK + T	6a - CD4+ TN	chr4-1720842-1721876	ENST00000617535	TACC3	ENSG00000013810	protein_coding	utr	chr4-1721545-1721643	0	4.24737e-08	-0.0966214	0.321	0.34	0.00878759	closed
CM vs HM	6 - NK + T	6a - CD4+ TN	chr6-139112803-139113943	ENST00000367658	HECA	ENSG00000112406	protein_coding	exon	chr6-139135112-139135667	21168	4.35488e-08	-0.143311	0.139	0.177	0.00901004	closed
CM vs HM	6 - NK + T	6a - CD4+ TN	chr18-9090790-9091823	ENST00000318388	NDUFV2	ENSG00000178127	protein_coding	exon	chr18-9102630-9102797	10806	4.39945e-08	0.26914	0.275	0.151	0.00910225	open
CM vs HM	6 - NK + T	6a - CD4+ TN	chr16-27203313-27204296	ENST00000441782	KDM8	ENSG00000155666	protein_coding	cds	chr16-27204093-27204175	0	4.4168e-08	-0.111598	0.358	0.391	0.00913815	closed
CM vs HM	6 - NK + T	6a - CD4+ TN	chr16-3150105-3151084	ENST00000570843	RP11-473M20.16	ENSG00000261889	lincRNA	exon	chr16-3156736-3157483	5651	4.43755e-08	-0.120482	0.227	0.256	0.00918107	closed
CM vs HM	6 - NK + T	6a - CD4+ TN	chr1-23979792-23980839	ENST00000495785	SRSF10	ENSG00000188529	protein_coding	cds	chr1-23980191-23980255	0	4.49216e-08	-0.0951353	0.322	0.34	0.00929406	closed
CM vs HM	6 - NK + T	6a - CD4+ TN	chr16-81006794-81007808	ENST00000630396	CMC2	ENSG00000103121	protein_coding	utr	chr16-81006734-81006897	0	4.49217e-08	-0.084094	0.483	0.495	0.00929408	closed
CM vs HM	6 - NK + T	6a - CD4+ TN	chr19-41327312-41329533	ENST00000598758	TGFB1	ENSG00000105329	protein_coding	gap	chr19-41302721-41332127	0	4.4971e-08	0.182628	0.229	0.111	0.00930427	open
CM vs HM	6 - NK + T	6a - CD4+ TN	chr6-137883212-137884180	ENST00000612899	TNFAIP3	ENSG00000118503	protein_coding	utr	chr6-137881320-137883311	0	4.49912e-08	0.206031	0.082	0.023	0.00930846	open
CM vs HM	6 - NK + T	6a - CD4+ TN	chr8-127977515-127978475	ENST00000519481	PVT1	ENSG00000249859	lincRNA	gap	chr8-127890999-127989161	0	4.52212e-08	-0.133855	0.089	0.125	0.00935604	closed
CM vs HM	6 - NK + T	6a - CD4+ TN	chr15-58517003-58519316	ENST00000559845	LIPC	ENSG00000166035	protein_coding	gap	chr15-58432121-58541784	0	4.92989e-08	0.215004	0.183	0.08	0.0101997	open
CM vs HM	6 - NK + T	6a - CD4+ TN	chr14-61343755-61345856	ENST00000553831	PRKCH	ENSG00000027075	protein_coding	utr	chr14-61344242-61344416	0	5.19527e-08	0.249439	0.167	0.073	0.0107487	open
CM vs HM	6 - NK + T	6a - CD4+ TN	chr1-228082136-228083103	ENST00000540651	ARF1	ENSG00000143761	protein_coding	utr	chr1-228082660-228082850	0	5.22281e-08	-0.10582	0.308	0.328	0.0108057	closed
CM vs HM	6 - NK + T	6a - CD4+ TN	chr22-40950823-40951901	ENST00000216225	RBX1	ENSG00000100387	protein_coding	cds	chr22-40951399-40951476	0	5.30761e-08	-0.0887405	0.527	0.551	0.0109812	closed
CM vs HM	6 - NK + T	6a - CD4+ TN	chr19-49876106-49877085	ENST00000391835	AKT1S1	ENSG00000204673	protein_coding	cds	chr19-49876603-49876655	0	5.43923e-08	-0.0918711	0.372	0.378	0.0112535	closed
CM vs HM	6 - NK + T	6a - CD4+ TN	chr5-157166162-157167930	ENST00000302938	FAM71B	ENSG00000170613	protein_coding	cds	chr5-157165563-157166168	0	5.50236e-08	0.247297	0.075	0.022	0.0113841	open
CM vs HM	6 - NK + T	6a - CD4+ TN	chr19-38930239-38931205	ENST00000600042	SARS2	ENSG00000104835	protein_coding	cds	chr19-38930470-38930736	0	5.58772e-08	-0.0846833	0.392	0.411	0.0115607	closed
CM vs HM	6 - NK + T	6a - CD4+ TN	chr1-15524124-15525283	ENST00000546424	CASP9	ENSG00000132906	protein_coding	cds	chr1-15524069-15524200	0	5.6088e-08	-0.0739275	0.602	0.608	0.0116043	closed
CM vs HM	6 - NK + T	6a - CD4+ TN	chr16-352227-353573	ENST00000354866	AXIN1	ENSG00000103126	protein_coding	utr	chr16-352369-352449	0	5.72326e-08	-0.0934417	0.449	0.477	0.0118411	closed
CM vs HM	6 - NK + T	6a - CD4+ TN	chr19-10251463-10252458	ENST00000592514	MRPL4	ENSG00000105364	protein_coding	cds	chr19-10252397-10252463	0	5.74583e-08	-0.0942897	0.285	0.302	0.0118878	closed
CM vs HM	6 - NK + T	6a - CD4+ TN	chr21-32492758-32494059	ENST00000496615	EVA1C	ENSG00000166979	protein_coding	gap	chr21-32493763-32495026	0	5.89694e-08	0.140154	0.042	0.006	0.0122005	open
CM vs HM	6 - NK + T	6a - CD4+ TN	chr19-49641589-49642836	ENST00000598359	SCAF1	ENSG00000126461	protein_coding	utr	chr19-49642660-49642706	0	6.16938e-08	-0.0848411	0.438	0.46	0.0127641	closed
CM vs HM	6 - NK + T	6a - CD4+ TN	chr19-50607424-50608767	ENST00000595557	SYT3	ENSG00000213023	protein_coding	utr	chr19-50621307-50621428	12539	6.23147e-08	-0.137054	0.024	0.047	0.0128926	closed
CM vs HM	6 - NK + T	6a - CD4+ TN	chrX-1661063-1662149	ENST00000432523	ASMT	ENSG00000196433	protein_coding	utr	chrX-1643015-1643081	17981	6.30983e-08	0.162513	0.291	0.182	0.0130547	open
CM vs HM	6 - NK + T	6a - CD4+ TN	chr16-30334609-30335616	ENST00000305596	CD2BP2	ENSG00000169217	protein_coding	utr	chr16-30350766-30352984	15149	6.36476e-08	-0.0989014	0.244	0.262	0.0131684	closed
CM vs HM	6 - NK + T	6a - CD4+ TN	chr9-137604844-137605898	ENST00000461627	ARRDC1	ENSG00000197070	protein_coding	cds	chr9-137605718-137605835	0	6.40145e-08	-0.0932206	0.382	0.397	0.0132443	closed
CM vs HM	6 - NK + T	6a - CD4+ TN	chr13-20475426-20476654	ENST00000480748	CRYL1	ENSG00000165475	protein_coding	gap	chr13-20439755-20489369	0	6.61645e-08	-0.108284	0.206	0.226	0.0136891	closed
CM vs HM	6 - NK + T	6a - CD4+ TN	chr10-17205834-17207010	ENST00000479046	TRDMT1	ENSG00000107614	protein_coding	exon	chr10-17201571-17202054	3779	6.62863e-08	0.220994	0.163	0.07	0.0137143	open
CM vs HM	6 - NK + T	6a - CD4+ TN	chr1-161612007-161613067	ENST00000537821	RP11-25K21.6	ENSG00000273112	processed_transcript	exon	chr1-161604943-161605099	6907	6.8155e-08	-0.121201	0.239	0.266	0.0141009	closed
CM vs HM	6 - NK + T	6a - CD4+ TN	chr19-49639866-49640859	ENST00000246792	RRAS	ENSG00000126458	protein_coding	cds	chr19-49639946-49640098	0	7.28099e-08	-0.0904094	0.464	0.485	0.015064	closed
CM vs HM	6 - NK + T	6a - CD4+ TN	chr1-212738109-212739022	ENST00000366977	NSL1	ENSG00000117697	protein_coding	cds	chr1-212738408-212738686	0	7.33482e-08	0.149792	0.022	0.001	0.0151754	open
CM vs HM	6 - NK + T	6a - CD4+ TN	chr12-32138853-32140456	ENST00000548411	BICD1	ENSG00000151746	protein_coding	gap	chr12-32107545-32216246	0	7.51312e-08	0.203164	0.071	0.022	0.0155443	open
CM vs HM	6 - NK + T	6a - CD4+ TN	chr19-18272082-18273025	ENST00000612316	KIAA1683	ENSG00000130518	protein_coding	gap	chr19-18269588-18274402	0	7.596e-08	0.223672	0.089	0.029	0.0157157	open
CM vs HM	6 - NK + T	6a - CD4+ TN	chr6-134246924-134247884	ENST00000531575	SGK1	ENSG00000118515	protein_coding	gap	chr6-134207432-134249455	0	7.62126e-08	-0.105743	0.157	0.179	0.015768	closed
CM vs HM	6 - NK + T	6a - CD4+ TN	chr19-19668048-19669123	ENST00000592502	ZNF101	ENSG00000181896	protein_coding	cds	chr19-19668964-19668966	0	7.62957e-08	-0.111939	0.285	0.322	0.0157852	closed
CM vs HM	6 - NK + T	6a - CD4+ TN	chr1-6447524-6448469	ENST00000475228	ESPN	ENSG00000187017	protein_coding	utr	chr1-6448467-6448561	0	7.673e-08	0.229755	0.09	0.029	0.0158751	open
CM vs HM	6 - NK + T	6a - CD4+ TN	chr14-22588924-22590184	ENST00000543337	DAD1	ENSG00000129562	protein_coding	cds	chr14-22589031-22589157	0	7.68039e-08	-0.0964388	0.415	0.442	0.0158903	closed
CM vs HM	6 - NK + T	6a - CD4+ TN	chr17-77957841-77959048	ENST00000636222	TNRC6C	ENSG00000078687	protein_coding	exon	chr17-77959240-77959268	191	7.70904e-08	-0.0867323	0.467	0.492	0.0159496	closed
CM vs HM	6 - NK + T	6a - CD4+ TN	chr22-50191203-50192361	ENST00000463233	TRABD	ENSG00000170638	protein_coding	gap	chr22-50186002-50193026	0	7.71792e-08	0.215384	0.332	0.196	0.015968	open
CM vs HM	6 - NK + T	6a - CD4+ TN	chr19-41263569-41264537	ENST00000617774	HNRNPUL1	ENSG00000105323	protein_coding	cds	chr19-41264504-41264692	0	7.73093e-08	-0.0742412	0.516	0.522	0.0159949	closed
CM vs HM	6 - NK + T	6a - CD4+ TN	chr7-12403258-12404780	ENST00000521169	VWDE	ENSG00000146530	protein_coding	cds	chr7-12403659-12403716	0	7.87394e-08	0.239459	0.109	0.038	0.0162908	open
CM vs HM	6 - NK + T	6a - CD4+ TN	chr6-142146744-142147666	ENST00000620996	VTA1	ENSG00000009844	protein_coding	cds	chr6-142147288-142147399	0	8.18647e-08	-0.108836	0.317	0.343	0.0169374	closed
CM vs HM	6 - NK + T	6a - CD4+ TN	chr17-41688452-41689097	ENST00000591776	EIF1	ENSG00000173812	protein_coding	cds	chr17-41689039-41689069	0	8.3434e-08	-0.0878604	0.41	0.429	0.0172621	closed
CM vs HM	6 - NK + T	6a - CD4+ TN	chr12-25859640-25860642	ENST00000544399	RP11-443N24.4	ENSG00000256256	lincRNA	exon	chr12-25882955-25883309	22312	8.34626e-08	0.208191	0.173	0.081	0.017268	open
CM vs HM	6 - NK + T	6a - CD4+ TN	chr5-176361350-176362391	ENST00000620366	KIAA1191	ENSG00000122203	protein_coding	utr	chr5-176361602-176361807	0	8.38297e-08	-0.0949727	0.326	0.342	0.0173439	closed
CM vs HM	6 - NK + T	6a - CD4+ TN	chr19-662823-663876	ENST00000605891	RNF126	ENSG00000070423	protein_coding	cds	chr19-663047-663121	0	8.51853e-08	-0.0995119	0.181	0.207	0.0176244	closed
CM vs HM	6 - NK + T	6a - CD4+ TN	chr1-44730471-44731619	ENST00000535358	C1orf228	ENSG00000198520	protein_coding	utr	chr1-44725404-44725591	4879	8.66673e-08	-0.110985	0.243	0.281	0.017931	closed
CM vs HM	6 - NK + T	6a - CD4+ TN	chr12-8319990-8321136	ENST00000544461	LINC00937	ENSG00000226091	lincRNA	gap	chr12-8316540-8390269	0	8.96619e-08	0.170684	0.073	0.022	0.0185506	open
CM vs HM	6 - NK + T	6a - CD4+ TN	chr12-3962248-3963409	ENST00000543206	RP11-320N7.2	ENSG00000256969	lincRNA	exon	chr12-4020977-4021081	57567	9.20644e-08	0.218119	0.282	0.16	0.0190477	open
CM vs HM	6 - NK + T	6a - CD4+ TN	chr17-40417544-40418534	ENST00000423485	TOP2A	ENSG00000131747	protein_coding	cds	chr17-40417771-40417791	0	9.39997e-08	-0.0939863	0.288	0.304	0.0194481	closed
CM vs HM	6 - NK + T	6a - CD4+ TN	chr9-6756911-6758170	ENST00000543771	KDM4C	ENSG00000107077	protein_coding	utr	chr9-6758143-6758203	0	9.55233e-08	-0.0888364	0.408	0.418	0.0197633	closed
CM vs HM	6 - NK + T	6a - CD4+ TN	chr3-101520866-101521991	ENST00000314261	SENP7	ENSG00000138468	protein_coding	exon	chr3-101513091-101513241	7624	9.69412e-08	0.23145	0.144	0.06	0.0200567	open
CM vs HM	6 - NK + T	6a - CD4+ TN	chr12-6708551-6709675	ENST00000320591	PIANP	ENSG00000139200	protein_coding	exon	chr12-6700614-6700800	7750	1.01131e-07	0.194526	0.051	0.013	0.0209235	open
CM vs HM	6 - NK + T	6a - CD4+ TN	chr16-2155068-2156229	ENST00000567653	TRAF7	ENSG00000131653	protein_coding	utr	chr16-2155804-2155858	0	1.04371e-07	-0.0876956	0.437	0.453	0.0215939	closed
CM vs HM	6 - NK + T	6a - CD4+ TN	chr16-50065574-50066693	ENST00000299192	HEATR3	ENSG00000155393	protein_coding	cds	chr16-50066367-50066539	0	1.05472e-07	-0.106758	0.205	0.225	0.0218217	closed
CM vs HM	6 - NK + T	6a - CD4+ TN	chr16-50337321-50338105	ENST00000475877	BRD7	ENSG00000166164	protein_coding	gap	chr16-50334896-50339975	0	1.07097e-07	-0.130908	0.006	0.026	0.0221578	closed
CM vs HM	6 - NK + T	6a - CD4+ TN	chr1-153990105-153991237	ENST00000392558	RPS27	ENSG00000177954	protein_coding	cds	chr1-153991115-153991309	0	1.07478e-07	-0.0908659	0.232	0.242	0.0222366	closed
CM vs HM	6 - NK + T	6a - CD4+ TN	chr1-211862128-211863058	ENST00000366997	LPGAT1	ENSG00000123684	protein_coding	exon	chr1-211830573-211830772	31355	1.14732e-07	0.127287	0.019	0	0.0237376	open
CM vs HM	6 - NK + T	6a - CD4+ TN	chr17-44186355-44187347	ENST00000592825	TMUB2	ENSG00000168591	protein_coding	utr	chr17-44187272-44187743	0	1.17075e-07	-0.0851807	0.436	0.442	0.0242222	closed
CM vs HM	6 - NK + T	6a - CD4+ TN	chr11-68119886-68120884	ENST00000356135	CHKA	ENSG00000110721	protein_coding	cds	chr11-68120828-68121177	0	1.18687e-07	0.247854	0.184	0.079	0.0245558	open
CM vs HM	6 - NK + T	6a - CD4+ TN	chr5-14870002-14870868	ENST00000505140	ANKH	ENSG00000154122	protein_coding	utr	chr5-14870183-14871066	0	1.23373e-07	0.223555	0.09	0.03	0.0255253	open
CM vs HM	6 - NK + T	6a - CD4+ TN	chr20-45934733-45935648	ENST00000372409	PCIF1	ENSG00000100982	protein_coding	utr	chr20-45934628-45934804	0	1.24085e-07	-0.0937379	0.35	0.367	0.0256726	closed
CM vs HM	6 - NK + T	6a - CD4+ TN	chr17-45161216-45162250	ENST00000593138	HEXIM2	ENSG00000168517	protein_coding	utr	chr17-45161078-45161248	0	1.25197e-07	-0.0941659	0.37	0.385	0.0259025	closed
CM vs HM	6 - NK + T	6a - CD4+ TN	chr1-52365657-52366872	ENST00000371586	CC2D1B	ENSG00000154222	protein_coding	utr	chr1-52366069-52366193	0	1.25477e-07	-0.0889252	0.408	0.421	0.0259606	closed
CM vs HM	6 - NK + T	6a - CD4+ TN	chr20-17682003-17682937	ENST00000455029	RRBP1	ENSG00000125844	protein_coding	utr	chr20-17682028-17682060	0	1.2617e-07	-0.0872642	0.406	0.429	0.026104	closed
CM vs HM	6 - NK + T	6a - CD4+ TN	chr2-196259995-196261247	ENST00000462290	HECW2	ENSG00000138411	protein_coding	gap	chr2-196257907-196271192	0	1.27571e-07	0.259119	0.204	0.1	0.0263937	open
CM vs HM	6 - NK + T	6a - CD4+ TN	chr19-58572952-58573818	ENST00000599369	MZF1	ENSG00000099326	protein_coding	utr	chr19-58573373-58573575	0	1.2785e-07	-0.0730858	0.485	0.496	0.0264516	closed
CM vs HM	6 - NK + T	6a - CD4+ TN	chr19-9785282-9786390	ENST00000589412	ZNF846	ENSG00000196605	protein_coding	utr	chr19-9785926-9785996	0	1.28052e-07	-0.0875556	0.363	0.384	0.0264934	closed
CM vs HM	6 - NK + T	6a - CD4+ TN	chr7-140084809-140085855	ENST00000472616	KDM7A	ENSG00000006459	protein_coding	utr	chr7-140084855-140091188	0	1.29659e-07	0.141507	0.027	0.003	0.0268257	open
CM vs HM	6 - NK + T	6a - CD4+ TN	chr8-11100456-11101444	ENST00000416569	XKR6	ENSG00000171044	protein_coding	gap	chr8-10924831-11200575	0	1.32412e-07	0.148497	0.025	0.002	0.0273954	open
CM vs HM	6 - NK + T	6a - CD4+ TN	chr14-69773540-69774470	ENST00000216540	SLC10A1	ENSG00000100652	protein_coding	utr	chr14-69775417-69776281	946	1.33128e-07	0.185747	0.055	0.012	0.0275436	open
CM vs HM	6 - NK + T	6a - CD4+ TN	chr16-30922388-30923542	ENST00000562798	FBXL19	ENSG00000099364	protein_coding	utr	chr16-30923055-30923152	0	1.35004e-07	-0.0775287	0.582	0.591	0.0279317	closed
CM vs HM	6 - NK + T	6a - CD4+ TN	chr10-6088455-6089687	ENST00000437845	RBM17	ENSG00000134453	protein_coding	cds	chr10-6089167-6089193	0	1.36577e-07	-0.100284	0.267	0.29	0.0282571	closed
CM vs HM	6 - NK + T	6a - CD4+ TN	chr14-23469024-23470048	ENST00000408901	NGDN	ENSG00000129460	protein_coding	cds	chr14-23470042-23470101	0	1.39531e-07	-0.0817653	0.434	0.453	0.0288683	closed
CM vs HM	6 - NK + T	6a - CD4+ TN	chr14-100192465-100193555	ENST00000305631	DEGS2	ENSG00000168350	protein_coding	exon	chr14-100159506-100160163	32301	1.41474e-07	-0.0949207	0.429	0.445	0.0292703	closed
CM vs HM	6 - NK + T	6a - CD4+ TN	chr17-81662736-81663751	ENST00000571224	PDE6G	ENSG00000185527	protein_coding	utr	chr17-81663059-81663112	0	1.46806e-07	0.181054	0.051	0.01	0.0303734	open
CM vs HM	6 - NK + T	6a - CD4+ TN	chr11-63838413-63839355	ENST00000508192	MARK2	ENSG00000072518	protein_coding	utr	chr11-63839005-63839506	0	1.4838e-07	-0.0861398	0.511	0.52	0.030699	closed
CM vs HM	6 - NK + T	6a - CD4+ TN	chr19-3984859-3985846	ENST00000309311	EEF2	ENSG00000167658	protein_coding	cds	chr19-3985378-3985380	0	1.58299e-07	-0.0892626	0.218	0.231	0.0327512	closed
CM vs HM	6 - NK + T	6a - CD4+ TN	chr19-45584162-45585179	ENST00000323060	OPA3	ENSG00000125741	protein_coding	cds	chr19-45584623-45584764	0	1.60698e-07	-0.0764245	0.533	0.553	0.0332475	closed
CM vs HM	6 - NK + T	6a - CD4+ TN	chr20-34302689-34303941	ENST00000217426	AHCY	ENSG00000101444	protein_coding	cds	chr20-34303243-34303270	0	1.61882e-07	-0.0867073	0.309	0.314	0.0334925	closed
CM vs HM	6 - NK + T	6a - CD4+ TN	chr17-4795617-4796611	ENST00000614486	PSMB6	ENSG00000142507	protein_coding	cds	chr17-4796195-4796296	0	1.632e-07	-0.107658	0.196	0.216	0.0337652	closed
CM vs HM	6 - NK + T	6a - CD4+ TN	chr1-223834524-223835547	ENST00000472180	TP53BP2	ENSG00000143514	protein_coding	gap	chr1-223821368-223845653	0	1.67755e-07	0.236256	0.064	0.017	0.0347077	open
CM vs HM	6 - NK + T	6a - CD4+ TN	chr19-995869-997087	ENST00000591997	WDR18	ENSG00000065268	protein_coding	gap	chr19-989916-998312	0	1.67757e-07	0.208359	0.157	0.07	0.0347081	open
CM vs HM	6 - NK + T	6a - CD4+ TN	chr19-7829405-7830628	ENST00000270530	EVI5L	ENSG00000142459	protein_coding	utr	chr19-7830233-7830381	0	1.67828e-07	-0.0857212	0.547	0.559	0.0347228	closed
CM vs HM	6 - NK + T	6a - CD4+ TN	chr1-12452861-12454045	ENST00000620676	VPS13D	ENSG00000048707	protein_coding	gap	chr1-12416828-12455997	0	1.71378e-07	0.233391	0.082	0.025	0.0354573	open
CM vs HM	6 - NK + T	6a - CD4+ TN	chr4-145487342-145488504	ENST00000515527	SMAD1	ENSG00000170365	protein_coding	gap	chr4-145482821-145514437	0	1.71564e-07	0.137538	0.026	0.002	0.0354958	open
CM vs HM	6 - NK + T	6a - CD4+ TN	chr6-31332487-31333548	ENST00000412585	HLA-B	ENSG00000234745	protein_coding	utr	chr6-31353872-31354296	20323	1.72974e-07	0.147673	0.032	0.004	0.0357875	open
CM vs HM	6 - NK + T	6a - CD4+ TN	chr16-68447897-68449292	ENST00000561749	SMPD3	ENSG00000103056	protein_coding	utr	chr16-68448353-68448492	0	1.75232e-07	-0.0944227	0.348	0.36	0.0362545	closed
CM vs HM	6 - NK + T	6a - CD4+ TN	chr17-75083720-75084793	ENST00000580123	SLC16A5	ENSG00000170190	protein_coding	exon	chr17-75087727-75087896	2933	1.77039e-07	0.220902	0.059	0.015	0.0366285	open
CM vs HM	6 - NK + T	6a - CD4+ TN	chr4-153111674-153112750	ENST00000515232	RP11-285C1.2	ENSG00000249022	lincRNA	exon	chr4-153091044-153091165	20508	1.77805e-07	0.220374	0.087	0.03	0.0367871	open
CM vs HM	6 - NK + T	6a - CD4+ TN	chr11-17013369-17015631	ENST00000532079	PLEKHA7	ENSG00000166689	protein_coding	cds	chr11-17014316-17014337	0	1.89446e-07	0.185512	0.064	0.02	0.0391955	open
CM vs HM	6 - NK + T	6a - CD4+ TN	chr8-1817774-1818471	ENST00000636175	RP11-439C15.6	ENSG00000283239	protein_coding	gap	chr8-1771598-1843352	0	1.90752e-07	0.194851	0.046	0.012	0.0394656	open
CM vs HM	6 - NK + T	6a - CD4+ TN	chr1-58779378-58780457	ENST00000371222	JUN	ENSG00000177606	protein_coding	utr	chr1-58780788-58782074	330	1.92032e-07	0.222096	0.081	0.025	0.0397305	open
CM vs HM	6 - NK + T	6a - CD4+ TN	chr20-62861207-62862455	ENST00000335351	TCFL5	ENSG00000101190	protein_coding	cds	chr20-62861024-62861670	0	1.93161e-07	-0.0944645	0.249	0.27	0.039964	closed
CM vs HM	6 - NK + T	6a - CD4+ TN	chr19-38849859-38850827	ENST00000601813	HNRNPL	ENSG00000104824	protein_coding	cds	chr19-38849871-38849940	0	1.94284e-07	-0.0842477	0.668	0.684	0.0401965	closed
CM vs HM	6 - NK + T	6a - CD4+ TN	chr1-204411467-204412422	ENST00000367188	PPP1R15B	ENSG00000158615	protein_coding	utr	chr1-204411412-204411791	0	1.94565e-07	-0.0754862	0.407	0.41	0.0402545	closed
CM vs HM	6 - NK + T	6a - CD4+ TN	chr9-125407713-125408676	ENST00000373511	MAPKAP1	ENSG00000119487	protein_coding	utr	chr9-125437393-125438886	28716	1.98926e-07	0.215062	0.075	0.02	0.0411568	open
CM vs HM	6 - NK + T	6a - CD4+ TN	chr3-137032211-137033200	ENST00000469964	IL20RB	ENSG00000174564	protein_coding	utr	chr3-137010113-137011085	21125	1.99205e-07	0.188845	0.054	0.012	0.0412146	open
CM vs HM	6 - NK + T	6a - CD4+ TN	chr1-108746056-108747150	ENST00000370008	STXBP3	ENSG00000116266	protein_coding	cds	chr1-108746738-108746786	0	1.99399e-07	-0.0945341	0.359	0.386	0.0412547	closed
CM vs HM	6 - NK + T	6a - CD4+ TN	chr17-22520816-22522225	ENST00000540040	MTRNR2L1	ENSG00000256618	protein_coding	exon	chr17-22523111-22524663	885	2.02755e-07	-0.196212	0.051	0.106	0.041949	closed
CM vs HM	6 - NK + T	6a - CD4+ TN	chr16-80931775-80932806	ENST00000219400	CMC2	ENSG00000103121	protein_coding	utr	chr16-80966448-80976092	33641	2.03858e-07	0.0953495	0.013	0	0.0421773	open
CM vs HM	6 - NK + T	6a - CD4+ TN	chr1-155858785-155859935	ENST00000368324	SYT11	ENSG00000132718	protein_coding	cds	chr1-155859762-155859795	0	2.04565e-07	-0.0964663	0.212	0.235	0.0423234	closed
CM vs HM	6 - NK + T	6a - CD4+ TN	chr16-29961375-29962468	ENST00000602948	TMEM219	ENSG00000149932	protein_coding	utr	chr16-29962030-29962132	0	2.14211e-07	-0.088966	0.255	0.27	0.0443191	closed
CM vs HM	6 - NK + T	6a - CD4+ TN	chr17-76997818-76998812	ENST00000564292	RP11-87G24.3	ENSG00000267568	processed_transcript	exon	chr17-76968884-76969156	28661	2.15627e-07	-0.123477	0.069	0.102	0.044612	closed
CM vs HM	6 - NK + T	6a - CD4+ TN	chr19-2900330-2901318	ENST00000614108	ZNF57	ENSG00000171970	protein_coding	cds	chr19-2901046-2901048	0	2.18492e-07	-0.0924079	0.267	0.291	0.0452048	closed
CM vs HM	6 - NK + T	6a - CD4+ TN	chr19-10731142-10732249	ENST00000586939	DNM2	ENSG00000079805	protein_coding	gap	chr19-10718647-10759737	0	2.21059e-07	0.213945	0.161	0.07	0.045736	open
CM vs HM	6 - NK + T	6a - CD4+ TN	chr1-200152858-200153855	ENST00000544748	NR5A2	ENSG00000116833	protein_coding	gap	chr1-200120956-200173962	0	2.23495e-07	-0.114321	0.011	0.035	0.04624	closed
CM vs HM	6 - NK + T	6a - CD4+ TN	chr10-11141053-11142200	ENST00000638035	CELF2	ENSG00000048740	protein_coding	gap	chr10-10920000-11165485	0	2.25768e-07	0.21597	0.063	0.017	0.0467102	open
CM vs HM	6 - NK + T	6a - CD4+ TN	chr12-124988630-124989659	ENST00000308736	DHX37	ENSG00000150990	protein_coding	cds	chr12-124988917-124989022	0	2.26929e-07	-0.115232	0.136	0.165	0.0469505	closed
CM vs HM	6 - NK + T	6a - CD4+ TN	chr1-10032375-10033309	ENST00000377153	UBE4B	ENSG00000130939	protein_coding	utr	chr1-10033274-10033670	0	2.30675e-07	-0.0839239	0.403	0.407	0.0477255	closed
CM vs HM	6 - NK + T	6a - CD4+ TN	chr19-7920118-7921194	ENST00000595637	SNAPC2	ENSG00000104976	protein_coding	cds	chr19-7920387-7920549	0	2.3509e-07	-0.084839	0.5	0.508	0.048639	closed
CM vs HM	6 - NK + T	6a - CD4+ TN	chr19-45385182-45386292	ENST00000591986	PPP1R13L	ENSG00000104881	protein_coding	cds	chr19-45385562-45385618	0	2.36428e-07	0.139286	0.023	0.002	0.0489157	open
CM vs HM	6 - NK + T	6a - CD4+ TN	chr14-102139193-102140257	ENST00000558600	HSP90AA1	ENSG00000080824	protein_coding	cds	chr14-102139250-102139404	0	2.37672e-07	-0.0879351	0.373	0.383	0.0491732	closed
CM vs HM	6 - NK + T	6a - CD4+ TN	chr1-226779266-226780231	ENST00000366784	ITPKB	ENSG00000143772	protein_coding	exon	chr1-226739041-226739323	39942	2.40929e-07	-0.120852	0.003	0.019	0.049847	closed
CM vs HM	6 - NK + T	6b - CD4+ Treg	chr17-32518955-32520959	ENST00000577352	MYO1D	ENSG00000176658	protein_coding	gap	chr17-32494916-32605086	0	2.20662e-11	0.349575	0.126	0.024	4.56539e-06	open
CM vs HM	6 - NK + T	6b - CD4+ Treg	chr2-113234994-113236052	ENST00000465084	PAX8	ENSG00000125618	protein_coding	cds	chr2-113235394-113235443	0	4.43599e-10	0.287407	0.054	0	9.17783e-05	open
CM vs HM	6 - NK + T	6b - CD4+ Treg	chr16-30657743-30658924	ENST00000356166	FBRS	ENSG00000156860	protein_coding	utr	chr16-30658431-30659518	0	1.67211e-09	-0.238309	0.486	0.676	0.000345951	closed
CM vs HM	6 - NK + T	6b - CD4+ Treg	chr19-9818868-9819839	ENST00000592067	FBXL12	ENSG00000127452	protein_coding	utr	chr19-9818814-9819079	0	5.86108e-09	-0.262365	0.366	0.569	0.00121263	closed
CM vs HM	6 - NK + T	6b - CD4+ Treg	chr19-45474868-45475979	ENST00000591858	FOSB	ENSG00000125740	protein_coding	utr	chr19-45473013-45475178	0	1.25714e-08	0.300232	0.131	0.043	0.00260095	open
CM vs HM	6 - NK + T	6b - CD4+ Treg	chr19-41327312-41329533	ENST00000598758	TGFB1	ENSG00000105329	protein_coding	gap	chr19-41302721-41332127	0	2.95167e-08	0.289266	0.251	0.123	0.00610686	open
CM vs HM	6 - NK + T	6b - CD4+ Treg	chr14-101760239-101761168	ENST00000422945	PPP2R5C	ENSG00000078304	protein_coding	exon	chr14-101761798-101761920	629	3.14549e-08	-0.269515	0.313	0.508	0.00650787	closed
CM vs HM	6 - NK + T	6b - CD4+ Treg	chr7-4204527-4205444	ENST00000615806	SDK1	ENSG00000146555	protein_coding	gap	chr7-4178587-4205878	0	3.75827e-08	0.212844	0.036	0	0.00777567	open
CM vs HM	6 - NK + T	6b - CD4+ Treg	chr12-52585667-52586683	ENST00000537672	KRT72	ENSG00000170486	protein_coding	cds	chr12-52585982-52586172	0	3.99121e-08	0.220754	0.064	0.006	0.00825762	open
CM vs HM	6 - NK + T	6b - CD4+ Treg	chr1-12178838-12179847	ENST00000536782	TNFRSF1B	ENSG00000028137	protein_coding	gap	chr1-12167170-12188795	0	4.04644e-08	0.313815	0.173	0.061	0.00837188	open
CM vs HM	6 - NK + T	6b - CD4+ Treg	chr19-39401011-39402129	ENST00000315588	MED29	ENSG00000063322	protein_coding	utr	chr19-39397700-39400637	373	6.6654e-08	0.301141	0.242	0.125	0.0137904	open
CM vs HM	6 - NK + T	6b - CD4+ Treg	chrX-1452526-1453654	ENST00000381333	ASMTL	ENSG00000169093	protein_coding	cds	chrX-1452748-1452840	0	7.3597e-08	-0.255798	0.366	0.543	0.0152268	closed
CM vs HM	6 - NK + T	6b - CD4+ Treg	chr19-50025198-50026220	ENST00000601364	ZNF473	ENSG00000142528	protein_coding	utr	chr19-50026040-50026122	0	1.47042e-07	-0.27043	0.283	0.437	0.0304222	closed
CM vs HM	6 - NK + T	6b - CD4+ Treg	chr11-125062625-125063585	ENST00000403796	SLC37A2	ENSG00000134955	protein_coding	cds	chr11-125063368-125063426	0	1.93054e-07	0.196746	0.036	0	0.0399419	open
CM vs HM	6 - NK + T	6b - CD4+ Treg	chr14-91366923-91368006	ENST00000554872	CCDC88C	ENSG00000015133	protein_coding	gap	chr14-91359712-91408658	0	2.07472e-07	0.285102	0.113	0.038	0.042925	open
CM vs HM	6 - NK + T	6c - CD4+ TCM	chr19-16368521-16370527	ENST00000602022	EPS15L1	ENSG00000127527	protein_coding	gap	chr19-16361985-16385128	0	3.54117e-08	-0.448835	0.213	0.41	0.00732651	closed
CM vs HM	6 - NK + T	6d - CD4+ TEM	chr22-18528382-18529603	ENST00000613577	TMEM191B	ENSG00000278558	protein_coding	cds	chr22-18529441-18529497	0	9.79567e-44	0.469682	0.344	0.106	2.02667e-38	open
CM vs HM	6 - NK + T	6d - CD4+ TEM	chr17-32518955-32520959	ENST00000577352	MYO1D	ENSG00000176658	protein_coding	gap	chr17-32494916-32605086	0	2.85822e-38	0.538712	0.277	0.05	5.91352e-33	open
CM vs HM	6 - NK + T	6d - CD4+ TEM	chr2-231425695-231426658	ENST00000287590	B3GNT7	ENSG00000156966	protein_coding	utr	chr2-231398926-231401164	24530	1.81266e-33	0.463961	0.171	0.02	3.7503e-28	open
CM vs HM	6 - NK + T	6d - CD4+ TEM	chr7-4204527-4205444	ENST00000615806	SDK1	ENSG00000146555	protein_coding	gap	chr7-4178587-4205878	0	1.36503e-30	0.421847	0.089	0	2.82418e-25	open
CM vs HM	6 - NK + T	6d - CD4+ TEM	chr11-692552-693535	ENST00000529717	DEAF1	ENSG00000177030	protein_coding	gap	chr11-691599-694678	0	1.00612e-26	0.458626	0.206	0.034	2.08161e-21	open
CM vs HM	6 - NK + T	6d - CD4+ TEM	chr6-90458195-90459345	ENST00000369332	MAP3K7	ENSG00000135341	protein_coding	utr	chr6-90513573-90516500	54227	7.26614e-21	0.509998	0.15	0.027	1.50333e-15	open
CM vs HM	6 - NK + T	6d - CD4+ TEM	chr8-29408061-29409016	ENST00000240100	DUSP4	ENSG00000120875	protein_coding	exon	chr8-29349846-29350668	57392	7.73037e-20	0.458032	0.204	0.055	1.59937e-14	open
CM vs HM	6 - NK + T	6d - CD4+ TEM	chr9-39809189-39810297	ENST00000627065	GLIDR	ENSG00000278175	lincRNA	gap	chr9-39809616-39809730	0	3.03298e-19	-0.24154	0.029	0.091	6.27508e-14	closed
CM vs HM	6 - NK + T	6d - CD4+ TEM	chr11-587622-588867	ENST00000534320	PHRF1	ENSG00000070047	protein_coding	gap	chr11-587465-591383	0	1.75246e-18	0.374632	0.238	0.067	3.62576e-13	open
CM vs HM	6 - NK + T	6d - CD4+ TEM	chr1-166988742-166989637	ENST00000447624	MAEL	ENSG00000143194	protein_coding	cds	chr1-166989353-166989484	0	3.53074e-18	-0.220521	0.001	0.037	7.30492e-13	closed
CM vs HM	6 - NK + T	6d - CD4+ TEM	GL000219.1-42149-43319	NA	NA	NA	NA	NA	NA	NA	7.86684e-18	0.359581	0.336	0.136	1.62761e-12	open
CM vs HM	6 - NK + T	6d - CD4+ TEM	chr1-19687775-19689077	ENST00000489814	TMCO4	ENSG00000162542	protein_coding	gap	chr1-19683445-19694433	0	1.13269e-16	0.337917	0.117	0.023	2.34348e-11	open
CM vs HM	6 - NK + T	6d - CD4+ TEM	chr5-50489182-50490177	ENST00000506190	EMB	ENSG00000170571	protein_coding	exon	chr5-50443190-50443248	45933	7.59424e-16	-0.218139	0.002	0.037	1.57121e-10	closed
CM vs HM	6 - NK + T	6d - CD4+ TEM	chr4-145481343-145483365	ENST00000515385	SMAD1	ENSG00000170365	protein_coding	utr	chr4-145482811-145483176	0	1.07136e-15	0.301668	0.107	0.017	2.21658e-10	open
CM vs HM	6 - NK + T	6d - CD4+ TEM	chr9-73171728-73173187	ENST00000376911	ANXA1	ENSG00000135046	protein_coding	utr	chr9-73170108-73170393	1334	5.88608e-15	0.309415	0.059	0.004	1.2178e-09	open
CM vs HM	6 - NK + T	6d - CD4+ TEM	chr10-95831951-95833010	ENST00000635677	ENTPD1	ENSG00000138185	protein_coding	gap	chr10-95823365-95839690	0	7.34511e-15	0.357504	0.161	0.05	1.51967e-09	open
CM vs HM	6 - NK + T	6d - CD4+ TEM	chr9-89501617-89502846	ENST00000455551	SEMA4D	ENSG00000187764	protein_coding	exon	chr9-89497919-89498130	3486	1.21222e-14	0.290381	0.239	0.098	2.50802e-09	open
CM vs HM	6 - NK + T	6d - CD4+ TEM	chr10-30751568-30752544	ENST00000416310	RP11-14C22.6	ENSG00000230720	lincRNA	exon	chr10-30723419-30723740	27827	3.28367e-14	0.224182	0.048	0.002	6.79376e-09	open
CM vs HM	6 - NK + T	6d - CD4+ TEM	chr7-134669428-134670602	ENST00000418040	BPGM	ENSG00000172331	protein_coding	gap	chr7-134662109-134678852	0	3.53808e-14	0.352507	0.294	0.117	7.32011e-09	open
CM vs HM	6 - NK + T	6d - CD4+ TEM	chr19-50383678-50384752	ENST00000613923	POLD1	ENSG00000062822	protein_coding	utr	chr19-50384323-50384390	0	3.83945e-14	-0.144615	0.403	0.442	7.94363e-09	closed
CM vs HM	6 - NK + T	6d - CD4+ TEM	chr19-41327312-41329533	ENST00000598758	TGFB1	ENSG00000105329	protein_coding	gap	chr19-41302721-41332127	0	4.26996e-14	0.285309	0.437	0.246	8.83433e-09	open
CM vs HM	6 - NK + T	6d - CD4+ TEM	chr2-241689008-241689932	ENST00000636051	ING5	ENSG00000168395	protein_coding	utr	chr2-241689838-241690610	0	1.58692e-13	0.232479	0.037	0.001	3.28326e-08	open
CM vs HM	6 - NK + T	6d - CD4+ TEM	chr3-32296239-32297900	ENST00000458535	CMTM8	ENSG00000170293	protein_coding	gap	chr3-32239120-32367871	0	1.86974e-13	0.384793	0.274	0.103	3.86839e-08	open
CM vs HM	6 - NK + T	6d - CD4+ TEM	chr18-13611923-13612957	ENST00000587757	LDLRAD4	ENSG00000168675	protein_coding	cds	chr18-13612705-13612774	0	4.11154e-13	0.324305	0.27	0.11	8.50656e-08	open
CM vs HM	6 - NK + T	6d - CD4+ TEM	chr19-872465-873779	ENST00000607471	MED16	ENSG00000175221	protein_coding	cds	chr19-873449-873582	0	4.74257e-13	-0.201366	0.174	0.236	9.81214e-08	closed
CM vs HM	6 - NK + T	6d - CD4+ TEM	chr2-151423448-151424509	ENST00000453091	RIF1	ENSG00000080345	protein_coding	gap	chr2-151423043-151428783	0	1.13355e-12	0.35803	0.165	0.044	2.34526e-07	open
CM vs HM	6 - NK + T	6d - CD4+ TEM	chr8-8788486-8790309	ENST00000521881	MFHAS1	ENSG00000147324	protein_coding	gap	chr8-8786056-8790323	0	1.13688e-12	0.256525	0.05	0.002	2.35215e-07	open
CM vs HM	6 - NK + T	6d - CD4+ TEM	chr19-41936236-41937176	ENST00000599589	ARHGEF1	ENSG00000076928	protein_coding	utr	chr19-41929655-41930150	6085	1.18249e-12	0.265326	0.082	0.011	2.44651e-07	open
CM vs HM	6 - NK + T	6d - CD4+ TEM	chr19-35000759-35001757	ENST00000603669	GRAMD1A	ENSG00000089351	protein_coding	gap	chr19-35000487-35002421	0	1.20097e-12	0.342798	0.22	0.079	2.48475e-07	open
CM vs HM	6 - NK + T	6d - CD4+ TEM	chr1-58929430-58930352	ENST00000634502	LINC01358	ENSG00000237352	lincRNA	exon	chr1-58933643-58933795	3290	1.46855e-12	0.289379	0.065	0.006	3.03835e-07	open
CM vs HM	6 - NK + T	6d - CD4+ TEM	chrX-1661063-1662149	ENST00000432523	ASMT	ENSG00000196433	protein_coding	utr	chrX-1643015-1643081	17981	2.55709e-12	0.217224	0.374	0.218	5.29049e-07	open
CM vs HM	6 - NK + T	6d - CD4+ TEM	chr5-139443471-139444570	ENST00000515823	ECSCR	ENSG00000279686	protein_coding	utr	chr5-139443685-139443767	0	2.95818e-12	0.388615	0.139	0.035	6.12032e-07	open
CM vs HM	6 - NK + T	6d - CD4+ TEM	chr6-168884134-168885262	ENST00000444586	RP3-495K2.3	ENSG00000225879	lincRNA	exon	chr6-168962610-168962901	77347	3.09336e-12	0.271028	0.142	0.04	6.40001e-07	open
CM vs HM	6 - NK + T	6d - CD4+ TEM	chr4-38949079-38950297	ENST00000358869	FAM114A1	ENSG00000197712	protein_coding	utr	chr4-38943558-38945739	3339	3.58316e-12	0.358046	0.259	0.106	7.41339e-07	open
CM vs HM	6 - NK + T	6d - CD4+ TEM	chr16-87842062-87843083	ENST00000565644	SLC7A5	ENSG00000103257	protein_coding	gap	chr16-87841156-87851723	0	3.76407e-12	0.243479	0.062	0.004	7.78768e-07	open
CM vs HM	6 - NK + T	6d - CD4+ TEM	chr8-8227498-8228922	ENST00000594215	RP11-556O5.6	ENSG00000268955	lincRNA	exon	chr8-8188535-8189195	38302	4.44445e-12	-0.0776744	0.354	0.308	9.19534e-07	closed
CM vs HM	6 - NK + T	6d - CD4+ TEM	chr7-38353060-38354912	ENST00000609522	RP11-121A8.1	ENSG00000272908	lincRNA	exon	chr7-38329240-38329643	23416	4.61337e-12	-0.162464	0.032	0.066	9.54484e-07	closed
CM vs HM	6 - NK + T	6d - CD4+ TEM	chr14-75282640-75284684	ENST00000303562	FOS	ENSG00000170345	protein_coding	utr	chr14-75281425-75282230	409	5.61055e-12	0.329032	0.318	0.144	1.16079e-06	open
CM vs HM	6 - NK + T	6d - CD4+ TEM	chr16-1308618-1309967	ENST00000567383	UBE2I	ENSG00000103275	protein_coding	utr	chr16-1309656-1309773	0	7.54929e-12	-0.123856	0.339	0.372	1.56191e-06	closed
CM vs HM	6 - NK + T	6d - CD4+ TEM	chr20-30376603-30377694	ENST00000380888	LINC01597	ENSG00000205611	lincRNA	exon	chr20-30288271-30288479	88123	8.08522e-12	-0.157295	0.184	0.224	1.67279e-06	closed
CM vs HM	6 - NK + T	6d - CD4+ TEM	chr21-42737773-42738850	ENST00000497805	PDE9A	ENSG00000160191	protein_coding	gap	chr21-42733427-42743775	0	9.37066e-12	-0.195564	0.007	0.044	1.93874e-06	closed
CM vs HM	6 - NK + T	6d - CD4+ TEM	chr1-628755-630979	ENST00000635509	RP5-857K21.4	ENSG00000230021	lincRNA	gap	chr1-601578-711710	0	1.12189e-11	-0.230537	0.024	0.084	2.32114e-06	closed
CM vs HM	6 - NK + T	6d - CD4+ TEM	chr18-54086039-54087138	ENST00000256429	MBD2	ENSG00000134046	protein_coding	utr	chr18-54151601-54155311	64462	1.20223e-11	-0.230392	0.008	0.044	2.48735e-06	closed
CM vs HM	6 - NK + T	6d - CD4+ TEM	chr17-16997247-16998176	ENST00000419151	AC104024.2	ENSG00000230969	lincRNA	exon	chr17-16990109-16990177	7069	1.31267e-11	-0.152505	0	0.023	2.71584e-06	closed
CM vs HM	6 - NK + T	6d - CD4+ TEM	chr9-177963-179655	ENST00000616944	CBWD1	ENSG00000172785	protein_coding	cds	chr9-178816-178969	0	1.35689e-11	-0.211923	0.025	0.072	2.80735e-06	closed
CM vs HM	6 - NK + T	6d - CD4+ TEM	chr15-33125905-33127010	ENST00000616417	FMN1	ENSG00000248905	protein_coding	gap	chr15-33088975-33153047	0	1.62878e-11	-0.222643	0.05	0.1	3.36986e-06	closed
CM vs HM	6 - NK + T	6d - CD4+ TEM	chr17-35171214-35172255	ENST00000591048	UNC45B	ENSG00000141161	protein_coding	cds	chr17-35171322-35171462	0	1.84098e-11	-0.201759	0.018	0.064	3.8089e-06	closed
CM vs HM	6 - NK + T	6d - CD4+ TEM	chr3-101520866-101521991	ENST00000314261	SENP7	ENSG00000138468	protein_coding	exon	chr3-101513091-101513241	7624	2.05185e-11	0.337521	0.216	0.081	4.24518e-06	open
CM vs HM	6 - NK + T	6d - CD4+ TEM	chr19-659144-659941	ENST00000605891	RNF126	ENSG00000070423	protein_coding	gap	chr19-652885-663046	0	2.46664e-11	0.292107	0.12	0.03	5.10335e-06	open
CM vs HM	6 - NK + T	6d - CD4+ TEM	chr5-76790412-76791512	ENST00000514165	F2RL1	ENSG00000164251	protein_coding	exon	chr5-76818933-76819001	27420	2.57591e-11	0.290461	0.074	0.011	5.32942e-06	open
CM vs HM	6 - NK + T	6d - CD4+ TEM	chr2-113234994-113236052	ENST00000465084	PAX8	ENSG00000125618	protein_coding	cds	chr2-113235394-113235443	0	2.82016e-11	0.257945	0.079	0.016	5.83477e-06	open
CM vs HM	6 - NK + T	6d - CD4+ TEM	GL000219.1-44571-46628	NA	NA	NA	NA	NA	NA	NA	2.8469e-11	0.297111	0.118	0.029	5.8901e-06	open
CM vs HM	6 - NK + T	6d - CD4+ TEM	chr2-87824591-87826386	ENST00000398146	RGPD2	ENSG00000185304	protein_coding	cds	chr2-87825658-87825729	0	3.20944e-11	0.214842	0.04	0.003	6.64018e-06	open
CM vs HM	6 - NK + T	6d - CD4+ TEM	chr1-9425921-9427006	ENST00000517147	RNA5SP40	ENSG00000252956	rRNA	exon	chr1-9437669-9437778	10662	3.2515e-11	0.294937	0.316	0.153	6.72719e-06	open
CM vs HM	6 - NK + T	6d - CD4+ TEM	chr11-11149447-11150545	ENST00000525758	RP11-179A10.1	ENSG00000254401	lincRNA	gap	chr11-11120536-11167822	0	3.45225e-11	0.273597	0.373	0.195	7.14253e-06	open
CM vs HM	6 - NK + T	6d - CD4+ TEM	chr2-37344391-37345482	ENST00000404976	QPCT	ENSG00000115828	protein_coding	cds	chr2-37344732-37344851	0	3.74987e-11	0.332176	0.164	0.052	7.75829e-06	open
CM vs HM	6 - NK + T	6d - CD4+ TEM	chr19-680277-681276	ENST00000589185	FSTL3	ENSG00000070404	protein_coding	cds	chr19-680318-680489	0	4.80385e-11	-0.106375	0.508	0.532	9.93893e-06	closed
CM vs HM	6 - NK + T	6d - CD4+ TEM	chr10-21740675-21741721	ENST00000631589	MLLT10	ENSG00000078403	protein_coding	gap	chr10-21740237-21741938	0	6.14126e-11	0.314752	0.184	0.059	1.2706e-05	open
CM vs HM	6 - NK + T	6d - CD4+ TEM	chr11-61962948-61964089	ENST00000449131	BEST1	ENSG00000167995	protein_coding	cds	chr11-61962255-61963149	0	6.35939e-11	0.341352	0.173	0.058	1.31573e-05	open
CM vs HM	6 - NK + T	6d - CD4+ TEM	chr17-68059993-68060996	ENST00000537025	KPNA2	ENSG00000182481	protein_coding	utr	chr17-68046597-68046842	13150	6.69903e-11	-0.214091	0.03	0.065	1.386e-05	closed
CM vs HM	6 - NK + T	6d - CD4+ TEM	chr16-56860070-56861102	ENST00000438926	SLC12A3	ENSG00000070915	protein_coding	exon	chr16-56865207-56865517	4104	8.52814e-11	0.316222	0.12	0.03	1.76443e-05	open
CM vs HM	6 - NK + T	6d - CD4+ TEM	chr17-8382934-8383900	ENST00000584343	RPL26	ENSG00000161970	protein_coding	utr	chr17-8382775-8383193	0	9.27115e-11	-0.0974019	0.428	0.431	1.91815e-05	closed
CM vs HM	6 - NK + T	6d - CD4+ TEM	chr10-130300906-130302009	ENST00000481034	GLRX3	ENSG00000108010	protein_coding	utr	chr10-130183868-130184521	116384	1.15272e-10	-0.16838	0.112	0.158	2.38493e-05	closed
CM vs HM	6 - NK + T	6d - CD4+ TEM	chr19-18192565-18193565	ENST00000599612	MPV17L2	ENSG00000254858	protein_coding	cds	chr19-18193282-18193468	0	1.33118e-10	-0.108986	0.559	0.564	2.75414e-05	closed
CM vs HM	6 - NK + T	6d - CD4+ TEM	chr21-42266725-42267694	ENST00000462050	ABCG1	ENSG00000160179	protein_coding	gap	chr21-42225915-42271069	0	1.40431e-10	0.26858	0.057	0.006	2.90545e-05	open
CM vs HM	6 - NK + T	6d - CD4+ TEM	chr7-38348946-38350474	ENST00000609522	RP11-121A8.1	ENSG00000272908	lincRNA	exon	chr7-38329240-38329643	19302	1.45904e-10	-0.183905	0.02	0.059	3.01868e-05	closed
CM vs HM	6 - NK + T	6d - CD4+ TEM	chr12-52585667-52586683	ENST00000537672	KRT72	ENSG00000170486	protein_coding	cds	chr12-52585982-52586172	0	2.10671e-10	0.250468	0.159	0.048	4.35867e-05	open
CM vs HM	6 - NK + T	6d - CD4+ TEM	chr3-93470147-93471082	ENST00000394236	PROS1	ENSG00000184500	protein_coding	utr	chr3-93873033-93874244	401950	2.21823e-10	0.228093	0.482	0.3	4.58941e-05	open
CM vs HM	6 - NK + T	6d - CD4+ TEM	chr2-136113002-136114092	ENST00000409817	CXCR4	ENSG00000121966	protein_coding	utr	chr2-136114349-136114868	256	2.26804e-10	0.334904	0.136	0.034	4.69245e-05	open
CM vs HM	6 - NK + T	6d - CD4+ TEM	chr15-41894366-41895505	ENST00000320955	SPTBN5	ENSG00000137877	protein_coding	exon	chr15-41893899-41894077	288	2.99448e-10	0.26802	0.321	0.159	6.19542e-05	open
CM vs HM	6 - NK + T	6d - CD4+ TEM	chrX-1471368-1472592	ENST00000460672	P2RY8	ENSG00000182162	protein_coding	gap	chrX-1466583-1494092	0	3.50037e-10	0.26771	0.255	0.119	7.24208e-05	open
CM vs HM	6 - NK + T	6d - CD4+ TEM	chr16-27318038-27319273	ENST00000563002	IL4R	ENSG00000077238	protein_coding	utr	chr16-27318635-27318767	0	3.63113e-10	0.343227	0.165	0.051	7.51262e-05	open
CM vs HM	6 - NK + T	6d - CD4+ TEM	chr19-18271054-18271948	ENST00000612316	KIAA1683	ENSG00000130518	protein_coding	gap	chr19-18269588-18274402	0	4.09247e-10	0.31491	0.111	0.028	8.46711e-05	open
CM vs HM	6 - NK + T	6d - CD4+ TEM	chr15-44986116-44987021	ENST00000340827	TERB2	ENSG00000167014	protein_coding	utr	chr15-44978629-44979229	6886	4.5081e-10	0.213254	0.028	0	9.32704e-05	open
CM vs HM	6 - NK + T	6d - CD4+ TEM	chr19-56538153-56539235	ENST00000591844	ZFP28	ENSG00000196867	protein_coding	cds	chr19-56539019-56539226	0	4.64059e-10	-0.141545	0.152	0.185	9.60115e-05	closed
CM vs HM	6 - NK + T	6d - CD4+ TEM	chr16-66984433-66985592	ENST00000540947	CES4A	ENSG00000172824	protein_coding	exon	chr16-66988589-66988830	2996	5.39611e-10	0.380716	0.117	0.033	0.000111643	open
CM vs HM	6 - NK + T	6d - CD4+ TEM	chr16-50338593-50339699	ENST00000475877	BRD7	ENSG00000166164	protein_coding	gap	chr16-50334896-50339975	0	5.6967e-10	-0.20201	0.07	0.124	0.000117862	closed
CM vs HM	6 - NK + T	6d - CD4+ TEM	chr20-57708474-57709213	ENST00000472841	PMEPA1	ENSG00000124225	protein_coding	gap	chr20-57659698-57711323	0	6.29521e-10	0.281461	0.079	0.013	0.000130245	open
CM vs HM	6 - NK + T	6d - CD4+ TEM	chr20-48876993-48877952	ENST00000618168	RP5-906C1.1	ENSG00000278231	lincRNA	exon	chr20-48849435-48849458	27534	6.73233e-10	0.178179	0.025	0.001	0.000139289	open
CM vs HM	6 - NK + T	6d - CD4+ TEM	chr19-58278343-58279455	ENST00000621650	ZNF8	ENSG00000278129	protein_coding	cds	chr19-58279082-58279147	0	7.35857e-10	-0.109624	0.348	0.363	0.000152245	closed
CM vs HM	6 - NK + T	6d - CD4+ TEM	chr19-38506732-38507829	ENST00000594335	RYR1	ENSG00000196218	protein_coding	cds	chr19-38507712-38507827	0	7.95498e-10	-0.138396	0.21	0.233	0.000164585	closed
CM vs HM	6 - NK + T	6d - CD4+ TEM	chr7-143619748-143621485	ENST00000518791	TCAF2	ENSG00000170379	protein_coding	cds	chr7-143620955-143621020	0	8.66812e-10	-0.153348	0.007	0.037	0.000179339	closed
CM vs HM	6 - NK + T	6d - CD4+ TEM	chr13-73715195-73716273	ENST00000377669	KLF12	ENSG00000118922	protein_coding	cds	chr13-73715368-73715525	0	8.77095e-10	0.298433	0.264	0.123	0.000181467	open
CM vs HM	6 - NK + T	6d - CD4+ TEM	chr17-45583057-45584098	ENST00000586348	RP11-798G7.6	ENSG00000267198	lincRNA	exon	chr17-45562646-45563230	19826	1.03484e-09	0.319362	0.253	0.106	0.000214103	open
CM vs HM	6 - NK + T	6d - CD4+ TEM	chr6-45677144-45678185	ENST00000576263	RUNX2	ENSG00000124813	protein_coding	utr	chr6-45663723-45664349	12794	1.07093e-09	0.268231	0.113	0.036	0.00022157	open
CM vs HM	6 - NK + T	6d - CD4+ TEM	chr6-25881710-25882967	ENST00000360657	SLC17A3	ENSG00000124564	protein_coding	utr	chr6-25882034-25882286	0	1.10841e-09	0.295534	0.098	0.027	0.000229325	open
CM vs HM	6 - NK + T	6d - CD4+ TEM	chr19-6160844-6161973	ENST00000592677	ACSBG2	ENSG00000130377	protein_coding	cds	chr19-6161215-6161233	0	1.10943e-09	-0.184613	0.07	0.115	0.000229536	closed
CM vs HM	6 - NK + T	6d - CD4+ TEM	chr19-39401011-39402129	ENST00000315588	MED29	ENSG00000063322	protein_coding	utr	chr19-39397700-39400637	373	1.16079e-09	0.262215	0.45	0.26	0.000240161	open
CM vs HM	6 - NK + T	6d - CD4+ TEM	chr15-67081954-67082854	ENST00000559937	SMAD3	ENSG00000166949	protein_coding	gap	chr15-67078042-67164894	0	1.19385e-09	-0.157451	0.074	0.107	0.000247001	closed
CM vs HM	6 - NK + T	6d - CD4+ TEM	chr22-23984152-23985138	ENST00000404092	DDT	ENSG00000099977	protein_coding	exon	chr22-23980412-23980469	3682	1.2811e-09	-0.154851	0.005	0.032	0.000265052	closed
CM vs HM	6 - NK + T	6d - CD4+ TEM	chr16-50334945-50335980	ENST00000475877	BRD7	ENSG00000166164	protein_coding	gap	chr16-50334896-50339975	0	1.28378e-09	-0.17824	0.026	0.067	0.000265608	closed
CM vs HM	6 - NK + T	6d - CD4+ TEM	chr19-9818868-9819839	ENST00000592067	FBXL12	ENSG00000127452	protein_coding	utr	chr19-9818814-9819079	0	1.29003e-09	-0.113295	0.617	0.638	0.0002669	closed
CM vs HM	6 - NK + T	6d - CD4+ TEM	chr1-161612007-161613067	ENST00000537821	RP11-25K21.6	ENSG00000273112	processed_transcript	exon	chr1-161604943-161605099	6907	1.30284e-09	-0.128548	0.257	0.279	0.000269552	closed
CM vs HM	6 - NK + T	6d - CD4+ TEM	chr1-144076127-144077912	ENST00000369175	FAM72C	ENSG00000263513	protein_coding	exon	chr1-143970990-143971965	104161	1.57783e-09	0.279646	0.082	0.014	0.000326446	open
CM vs HM	6 - NK + T	6d - CD4+ TEM	chr6-33696369-33697323	ENST00000607484	UQCC2	ENSG00000137288	protein_coding	utr	chr6-33696761-33697652	0	1.83471e-09	0.306237	0.12	0.033	0.000379593	open
CM vs HM	6 - NK + T	6d - CD4+ TEM	chr18-48917102-48918172	ENST00000262158	SMAD7	ENSG00000101665	protein_coding	utr	chr18-48919853-48921371	1680	1.84962e-09	0.172132	0.03	0.001	0.000382676	open
CM vs HM	6 - NK + T	6d - CD4+ TEM	chr5-1518318-1519358	ENST00000514484	LPCAT1	ENSG00000153395	protein_coding	gap	chr5-1501604-1521346	0	1.90295e-09	0.219668	0.1	0.025	0.00039371	open
CM vs HM	6 - NK + T	6d - CD4+ TEM	chr1-6447524-6448469	ENST00000475228	ESPN	ENSG00000187017	protein_coding	utr	chr1-6448467-6448561	0	1.95498e-09	0.336732	0.143	0.041	0.000404475	open
CM vs HM	6 - NK + T	6d - CD4+ TEM	chr6-36027049-36028135	ENST00000622903	MAPK14	ENSG00000112062	protein_coding	utr	chr6-36027677-36028157	0	2.03592e-09	-0.0976095	0.414	0.431	0.000421222	closed
CM vs HM	6 - NK + T	6d - CD4+ TEM	chr3-194687474-194688621	ENST00000329759	FAM43A	ENSG00000185112	protein_coding	cds	chr3-194686827-194688098	0	2.18942e-09	0.304236	0.242	0.105	0.00045298	open
CM vs HM	6 - NK + T	6d - CD4+ TEM	chr12-96258105-96259069	ENST00000552142	ELK3	ENSG00000111145	protein_coding	gap	chr12-96223774-96259730	0	2.302e-09	0.221545	0.066	0.017	0.000476272	open
CM vs HM	6 - NK + T	6d - CD4+ TEM	chr2-1509054-1510086	ENST00000497517	TPO	ENSG00000115705	protein_coding	gap	chr2-1504080-1516882	0	2.91511e-09	-0.198986	0.052	0.097	0.000603122	closed
CM vs HM	6 - NK + T	6d - CD4+ TEM	chr11-63838413-63839355	ENST00000508192	MARK2	ENSG00000072518	protein_coding	utr	chr11-63839005-63839506	0	2.97456e-09	-0.103645	0.56	0.571	0.000615422	closed
CM vs HM	6 - NK + T	6d - CD4+ TEM	chr11-61021410-61022377	ENST00000313421	CD6	ENSG00000013725	protein_coding	utr	chr11-61019319-61020377	1032	3.01964e-09	-0.136947	0.231	0.263	0.000624748	closed
CM vs HM	6 - NK + T	6d - CD4+ TEM	chr2-241110330-241111883	ENST00000544142	PASK	ENSG00000115687	protein_coding	gap	chr2-241108301-241112239	0	3.13629e-09	0.302259	0.109	0.028	0.000648882	open
CM vs HM	6 - NK + T	6d - CD4+ TEM	chr20-57697988-57698847	ENST00000472841	PMEPA1	ENSG00000124225	protein_coding	gap	chr20-57659698-57711323	0	3.2065e-09	0.22246	0.037	0.003	0.00066341	open
CM vs HM	6 - NK + T	6d - CD4+ TEM	chr10-103986006-103987071	ENST00000369755	SLK	ENSG00000065613	protein_coding	gap	chr10-103967896-103990674	0	3.93188e-09	0.254757	0.055	0.006	0.000813487	open
CM vs HM	6 - NK + T	6d - CD4+ TEM	chr1-16709442-16710413	ENST00000624517	RP1-163M9.7	ENSG00000279151	lincRNA	exon	chr1-16705459-16705594	3847	5.10485e-09	0.253999	0.064	0.011	0.00105617	open
CM vs HM	6 - NK + T	6d - CD4+ TEM	chr9-40991714-40992787	ENST00000613309	PGM5-AS1	ENSG00000225655	lincRNA	exon	chr9-41073710-41073973	80922	5.22599e-09	-0.113099	0.587	0.602	0.00108123	closed
CM vs HM	6 - NK + T	6d - CD4+ TEM	chr1-152869467-152870457	ENST00000368765	SMCP	ENSG00000163206	protein_coding	exon	chr1-152878317-152878446	7859	5.27484e-09	0.188433	0.03	0.001	0.00109134	open
CM vs HM	6 - NK + T	6d - CD4+ TEM	chr19-35747828-35749012	ENST00000595455	LIN37	ENSG00000267796	protein_coding	cds	chr19-35748725-35748758	0	5.34988e-09	-0.107604	0.357	0.373	0.00110686	closed
CM vs HM	6 - NK + T	6d - CD4+ TEM	chr17-29148528-29149735	ENST00000628822	MYO18A	ENSG00000196535	protein_coding	gap	chr17-29122254-29165941	0	5.39523e-09	-0.124155	0.236	0.259	0.00111625	closed
CM vs HM	6 - NK + T	6d - CD4+ TEM	chr8-11820026-11821089	ENST00000623368	FDFT1	ENSG00000079459	protein_coding	gap	chr8-11809851-11821749	0	5.4708e-09	-0.184813	0.108	0.161	0.00113188	closed
CM vs HM	6 - NK + T	6d - CD4+ TEM	chr19-6199182-6200327	ENST00000592883	RFX2	ENSG00000087903	protein_coding	utr	chr19-6199476-6199529	0	5.52716e-09	-0.0858037	0.297	0.299	0.00114354	closed
CM vs HM	6 - NK + T	6d - CD4+ TEM	chr3-183815230-183816264	ENST00000318631	MAP6D1	ENSG00000180834	protein_coding	utr	chr3-183815876-183817355	0	5.9186e-09	0.21278	0.048	0.006	0.00122453	open
CM vs HM	6 - NK + T	6d - CD4+ TEM	chr17-75083720-75084793	ENST00000580123	SLC16A5	ENSG00000170190	protein_coding	exon	chr17-75087727-75087896	2933	6.03487e-09	0.172409	0.035	0.002	0.00124858	open
CM vs HM	6 - NK + T	6d - CD4+ TEM	chr4-153111674-153112750	ENST00000515232	RP11-285C1.2	ENSG00000249022	lincRNA	exon	chr4-153091044-153091165	20508	6.6081e-09	0.167921	0.046	0.005	0.00136718	open
CM vs HM	6 - NK + T	6d - CD4+ TEM	chr3-172517679-172518758	ENST00000494851	TNFSF10	ENSG00000121858	protein_coding	gap	chr3-172514999-172523252	0	6.72778e-09	0.349477	0.133	0.041	0.00139194	open
CM vs HM	6 - NK + T	6d - CD4+ TEM	chr1-61452840-61454062	ENST00000493627	NFIA	ENSG00000162599	protein_coding	gap	chr1-61439519-61455302	0	7.37818e-09	0.285471	0.107	0.026	0.00152651	open
CM vs HM	6 - NK + T	6d - CD4+ TEM	chr19-29695834-29696843	ENST00000623113	C19orf12	ENSG00000131943	protein_coding	utr	chr19-29698886-29702711	2042	7.59217e-09	0.245003	0.06	0.011	0.00157078	open
CM vs HM	6 - NK + T	6d - CD4+ TEM	chr19-995869-997087	ENST00000591997	WDR18	ENSG00000065268	protein_coding	gap	chr19-989916-998312	0	7.77283e-09	0.284527	0.262	0.117	0.00160816	open
CM vs HM	6 - NK + T	6d - CD4+ TEM	chr8-9011558-9012758	ENST00000523898	ERI1	ENSG00000104626	protein_coding	cds	chr8-9011542-9011752	0	8.4072e-09	-0.217487	0.037	0.084	0.00173941	closed
CM vs HM	6 - NK + T	6d - CD4+ TEM	chr11-96011826-96012822	ENST00000618849	MAML2	ENSG00000184384	protein_coding	gap	chr11-95991724-96091891	0	8.55429e-09	0.28587	0.245	0.099	0.00176984	open
CM vs HM	6 - NK + T	6d - CD4+ TEM	chr3-183348941-183349903	ENST00000488149	MCF2L2	ENSG00000053524	protein_coding	gap	chr3-183341631-183379296	0	8.63216e-09	0.204768	0.063	0.011	0.00178595	open
CM vs HM	6 - NK + T	6d - CD4+ TEM	chr18-23870911-23872006	ENST00000399516	LAMA3	ENSG00000053747	protein_coding	cds	chr18-23871431-23871661	0	8.85234e-09	0.273036	0.221	0.085	0.0018315	open
CM vs HM	6 - NK + T	6d - CD4+ TEM	chr19-2840760-2841829	ENST00000591539	ZNF555	ENSG00000186300	protein_coding	cds	chr19-2841573-2841575	0	8.91635e-09	-0.103559	0.38	0.383	0.00184475	closed
CM vs HM	6 - NK + T	6d - CD4+ TEM	chr3-32285192-32286403	ENST00000458535	CMTM8	ENSG00000170293	protein_coding	gap	chr3-32239120-32367871	0	1.07015e-08	0.280882	0.075	0.018	0.00221409	open
CM vs HM	6 - NK + T	6d - CD4+ TEM	chr1-8946232-8947209	ENST00000549778	CA6	ENSG00000131686	protein_coding	gap	chr1-8945966-8949262	0	1.09189e-08	0.263224	0.116	0.035	0.00225906	open
CM vs HM	6 - NK + T	6d - CD4+ TEM	chr16-1782307-1783257	ENST00000569898	NUBP2	ENSG00000095906	protein_coding	cds	chr16-1783021-1783036	0	1.12842e-08	-0.105945	0.504	0.51	0.00233464	closed
CM vs HM	6 - NK + T	6d - CD4+ TEM	chr19-1490046-1491505	ENST00000591201	PCSK4	ENSG00000115257	protein_coding	cds	chr19-1490158-1490335	0	1.39583e-08	-0.101515	0.537	0.549	0.00288791	closed
CM vs HM	6 - NK + T	6d - CD4+ TEM	chr4-2281516-2282553	ENST00000515312	ZFYVE28	ENSG00000159733	protein_coding	gap	chr4-2274217-2304288	0	1.39825e-08	0.203806	0.461	0.289	0.0028929	open
CM vs HM	6 - NK + T	6d - CD4+ TEM	chr22-37608187-37609276	ENST00000449944	GGA1	ENSG00000100083	protein_coding	cds	chr22-37609136-37609154	0	1.44024e-08	-0.0843951	0.506	0.503	0.00297978	closed
CM vs HM	6 - NK + T	6d - CD4+ TEM	chr18-23872558-23873497	ENST00000587184	LAMA3	ENSG00000053747	protein_coding	cds	chr18-23873045-23873215	0	1.45102e-08	0.285646	0.085	0.019	0.00300209	open
CM vs HM	6 - NK + T	6d - CD4+ TEM	chr1-203277696-203278874	ENST00000460619	CHIT1	ENSG00000133063	protein_coding	exon	chr1-203273376-203273641	4054	1.46613e-08	0.270433	0.131	0.038	0.00303334	open
CM vs HM	6 - NK + T	6d - CD4+ TEM	chr14-97993831-97994831	ENST00000499006	LINC01550	ENSG00000246223	lincRNA	exon	chr14-97977977-97978124	15706	1.46917e-08	-0.161761	0.098	0.137	0.00303964	closed
CM vs HM	6 - NK + T	6d - CD4+ TEM	chr16-11783200-11784256	ENST00000576018	ZC3H7A	ENSG00000122299	protein_coding	gap	chr16-11782389-11796218	0	1.74775e-08	-0.136628	0.189	0.221	0.00361601	closed
CM vs HM	6 - NK + T	6d - CD4+ TEM	chr7-36784606-36785576	ENST00000415356	AC007349.5	ENSG00000235728	lincRNA	exon	chr7-36782064-36782789	1816	1.93167e-08	0.251036	0.261	0.118	0.00399652	open
CM vs HM	6 - NK + T	6d - CD4+ TEM	chr22-50191203-50192361	ENST00000463233	TRABD	ENSG00000170638	protein_coding	gap	chr22-50186002-50193026	0	1.98164e-08	0.245211	0.387	0.213	0.00409992	open
CM vs HM	6 - NK + T	6d - CD4+ TEM	chr11-102360370-102362212	ENST00000621637	BIRC2	ENSG00000110330	protein_coding	gap	chr11-102350944-102362895	0	2.04115e-08	0.25312	0.279	0.136	0.00422303	open
CM vs HM	6 - NK + T	6d - CD4+ TEM	chr10-17238020-17239387	ENST00000487938	VIM	ENSG00000026025	protein_coding	utr	chr10-17237230-17237593	426	2.04736e-08	0.266512	0.061	0.011	0.00423588	open
CM vs HM	6 - NK + T	6d - CD4+ TEM	chr14-91366923-91368006	ENST00000554872	CCDC88C	ENSG00000015133	protein_coding	gap	chr14-91359712-91408658	0	2.07764e-08	0.310208	0.248	0.108	0.00429854	open
CM vs HM	6 - NK + T	6d - CD4+ TEM	chr17-40320906-40321650	ENST00000577646	RARA	ENSG00000131759	protein_coding	gap	chr17-40309287-40326474	0	2.09891e-08	0.278303	0.127	0.041	0.00434254	open
CM vs HM	6 - NK + T	6d - CD4+ TEM	chrX-1452526-1453654	ENST00000381333	ASMTL	ENSG00000169093	protein_coding	cds	chrX-1452748-1452840	0	2.12111e-08	-0.0955059	0.57	0.575	0.00438847	closed
CM vs HM	6 - NK + T	6d - CD4+ TEM	chr11-47767008-47767951	ENST00000540172	FNBP4	ENSG00000109920	protein_coding	cds	chr11-47767069-47767288	0	2.34826e-08	-0.0946602	0.505	0.513	0.00485844	closed
CM vs HM	6 - NK + T	6d - CD4+ TEM	chr18-13614518-13616255	ENST00000593236	LDLRAD4	ENSG00000168675	protein_coding	gap	chr18-13491470-13621116	0	2.41045e-08	0.277311	0.12	0.037	0.00498711	open
CM vs HM	6 - NK + T	6d - CD4+ TEM	chr10-84330014-84330945	ENST00000372088	CCSER2	ENSG00000107771	protein_coding	gap	chr10-84328809-84371013	0	2.51366e-08	0.270188	0.301	0.143	0.00520063	open
CM vs HM	6 - NK + T	6d - CD4+ TEM	chr22-25062076-25063075	ENST00000494730	KIAA1671	ENSG00000197077	protein_coding	gap	chr22-25049365-25170819	0	2.60466e-08	0.243586	0.214	0.09	0.00538892	open
CM vs HM	6 - NK + T	6d - CD4+ TEM	chr1-12178838-12179847	ENST00000536782	TNFRSF1B	ENSG00000028137	protein_coding	gap	chr1-12167170-12188795	0	2.62974e-08	0.266073	0.303	0.139	0.00544081	open
CM vs HM	6 - NK + T	6d - CD4+ TEM	chr20-21125516-21126520	ENST00000619574	KIZ	ENSG00000088970	protein_coding	cds	chr20-21126037-21126204	0	2.64241e-08	-0.105696	0.407	0.421	0.00546701	closed
CM vs HM	6 - NK + T	6d - CD4+ TEM	chr17-74852018-74853090	ENST00000347612	GRIN2C	ENSG00000161509	protein_coding	cds	chr17-74852013-74852611	0	2.73126e-08	-0.145131	0.055	0.087	0.00565083	closed
CM vs HM	6 - NK + T	6d - CD4+ TEM	chr2-10880308-10881317	ENST00000607419	RP11-245G13.2	ENSG00000271952	lincRNA	gap	chr2-10878445-10884833	0	2.85862e-08	0.139986	0.024	0	0.00591435	open
CM vs HM	6 - NK + T	6d - CD4+ TEM	chr16-354881-355858	ENST00000481769	AXIN1	ENSG00000103126	protein_coding	exon	chr16-352369-352673	2207	3.09237e-08	-0.18503	0.04	0.085	0.00639795	closed
CM vs HM	6 - NK + T	6d - CD4+ TEM	chr3-183515863-183516995	ENST00000489245	KLHL6	ENSG00000172578	protein_coding	gap	chr3-183508509-183527844	0	3.2849e-08	0.266611	0.184	0.07	0.00679629	open
CM vs HM	6 - NK + T	6d - CD4+ TEM	chr16-22189728-22190304	ENST00000602312	SDR42E2	ENSG00000183921	protein_coding	cds	chr16-22190139-22190393	0	3.53947e-08	-0.111568	0.317	0.335	0.00732298	closed
CM vs HM	6 - NK + T	6d - CD4+ TEM	chr1-26620212-26621176	ENST00000374163	RPS6KA1	ENSG00000117676	protein_coding	utr	chr1-26574079-26575030	45181	3.60599e-08	-0.0902986	0.407	0.421	0.00746062	closed
CM vs HM	6 - NK + T	6d - CD4+ TEM	chr1-16440206-16441637	ENST00000513161	NECAP2	ENSG00000157191	protein_coding	cds	chr1-16440772-16440853	0	3.85301e-08	-0.103638	0.245	0.256	0.00797169	closed
CM vs HM	6 - NK + T	6d - CD4+ TEM	chr15-83164677-83165734	ENST00000568129	RP11-382A20.3	ENSG00000166503	protein_coding	gap	chr15-83164076-83207330	0	3.89751e-08	0.211002	0.063	0.01	0.00806376	open
CM vs HM	6 - NK + T	6d - CD4+ TEM	chr12-12070717-12072759	ENST00000464885	BCL2L14	ENSG00000121380	protein_coding	utr	chr12-12072225-12072499	0	3.96461e-08	0.301274	0.107	0.032	0.00820259	open
CM vs HM	6 - NK + T	6d - CD4+ TEM	chr21-46626245-46627521	ENST00000355680	PRMT2	ENSG00000160310	protein_coding	exon	chr21-46635167-46635763	7645	3.98135e-08	0.21716	0.073	0.014	0.00823721	open
CM vs HM	6 - NK + T	6d - CD4+ TEM	chr16-84593892-84594905	ENST00000564662	COTL1	ENSG00000103187	protein_coding	gap	chr16-84590263-84617500	0	3.98873e-08	0.243906	0.306	0.164	0.00825249	open
CM vs HM	6 - NK + T	6d - CD4+ TEM	chr1-243916862-243917999	ENST00000440494	RP11-278H7.1	ENSG00000226828	lincRNA	gap	chr1-243917527-243978409	0	4.23253e-08	0.224017	0.052	0.008	0.0087569	open
CM vs HM	6 - NK + T	6d - CD4+ TEM	chr21-36113685-36114773	ENST00000422473	AP000688.29	ENSG00000233393	lincRNA	exon	chr21-36107598-36109690	3994	4.34511e-08	-0.129265	0.095	0.121	0.00898981	closed
CM vs HM	6 - NK + T	6d - CD4+ TEM	chr4-7875946-7877065	ENST00000420658	AFAP1	ENSG00000196526	protein_coding	gap	chr4-7872081-7939655	0	4.4963e-08	0.34124	0.115	0.035	0.00930261	open
CM vs HM	6 - NK + T	6d - CD4+ TEM	chr12-11546987-11547869	ENST00000536492	RP11-434C1.2	ENSG00000256237	lincRNA	gap	chr12-11541527-11555782	0	4.57992e-08	-0.129644	0.008	0.03	0.00947562	closed
CM vs HM	6 - NK + T	6d - CD4+ TEM	chr2-241881160-241882305	ENST00000457686	LINC01237	ENSG00000233806	processed_transcript	gap	chr2-241881475-241882559	0	4.73027e-08	-0.113633	0.475	0.513	0.00978668	closed
CM vs HM	6 - NK + T	6d - CD4+ TEM	chr13-114128627-114129608	ENST00000334062	RASA3	ENSG00000185989	protein_coding	gap	chr13-114073838-114132434	0	4.76163e-08	-0.128638	0.143	0.171	0.00985157	closed
CM vs HM	6 - NK + T	6d - CD4+ TEM	chr11-35046924-35047921	ENST00000477173	PDHX	ENSG00000110435	protein_coding	exon	chr11-35020208-35020591	26332	4.86558e-08	-0.113383	0.155	0.176	0.0100666	closed
CM vs HM	6 - NK + T	6d - CD4+ TEM	chr15-33226249-33227236	ENST00000616417	FMN1	ENSG00000248905	protein_coding	exon	chr15-33194578-33194733	31515	4.87986e-08	-0.186714	0.059	0.105	0.0100962	closed
CM vs HM	6 - NK + T	6d - CD4+ TEM	chr15-45376209-45377071	ENST00000558336	GATM	ENSG00000171766	protein_coding	cds	chr15-45376601-45376819	0	4.96368e-08	0.154316	0.021	0	0.0102696	open
CM vs HM	6 - NK + T	6d - CD4+ TEM	chr19-7920118-7921194	ENST00000595637	SNAPC2	ENSG00000104976	protein_coding	cds	chr19-7920387-7920549	0	5.25552e-08	-0.0825801	0.556	0.565	0.0108734	closed
CM vs HM	6 - NK + T	6d - CD4+ TEM	chr20-47205255-47206343	ENST00000619049	ZMYND8	ENSG00000101040	protein_coding	utr	chr20-47209214-47210657	2870	5.29753e-08	0.175734	0.029	0.002	0.0109603	open
CM vs HM	6 - NK + T	6d - CD4+ TEM	chr17-47066984-47067994	ENST00000575930	RP11-156P1.3	ENSG00000262879	processed_transcript	gap	chr17-47056754-47067413	0	5.31296e-08	-0.122336	0.144	0.173	0.0109922	closed
CM vs HM	6 - NK + T	6d - CD4+ TEM	chr7-6422898-6423807	ENST00000454738	DAGLB	ENSG00000164535	protein_coding	gap	chr7-6421805-6424751	0	5.33135e-08	0.224185	0.044	0.004	0.0110303	open
CM vs HM	6 - NK + T	6d - CD4+ TEM	chr17-77409336-77410445	ENST00000592420	2024-09-09	ENSG00000184640	protein_coding	gap	chr17-77402704-77482143	0	5.54615e-08	-0.163287	0.027	0.062	0.0114747	closed
CM vs HM	6 - NK + T	6d - CD4+ TEM	chr19-2900330-2901318	ENST00000614108	ZNF57	ENSG00000171970	protein_coding	cds	chr19-2901046-2901048	0	5.58904e-08	-0.105908	0.318	0.343	0.0115634	closed
CM vs HM	6 - NK + T	6d - CD4+ TEM	chr20-44068929-44070974	ENST00000413823	TOX2	ENSG00000124191	protein_coding	cds	chr20-44068650-44068936	0	5.62532e-08	0.229494	0.402	0.213	0.0116385	open
CM vs HM	6 - NK + T	6d - CD4+ TEM	chr8-19398926-19399998	ENST00000265807	SH2D4A	ENSG00000104611	protein_coding	utr	chr8-19394643-19396218	2707	5.6359e-08	0.249517	0.063	0.011	0.0116604	open
CM vs HM	6 - NK + T	6d - CD4+ TEM	chr22-40247645-40248695	ENST00000454349	TNRC6B	ENSG00000100354	protein_coding	gap	chr22-40246103-40251178	0	5.65255e-08	-0.161097	0.104	0.142	0.0116948	closed
CM vs HM	6 - NK + T	6d - CD4+ TEM	chr6-137982154-137983156	ENST00000417800	RP11-240M16.1	ENSG00000229922	lincRNA	exon	chr6-137972243-137972522	9631	5.82264e-08	0.279168	0.094	0.027	0.0120467	open
CM vs HM	6 - NK + T	6d - CD4+ TEM	chr3-14215907-14216991	ENST00000306024	LSM3	ENSG00000170860	protein_coding	utr	chr3-14198117-14201119	14787	5.83306e-08	0.166128	0.086	0.045	0.0120683	open
CM vs HM	6 - NK + T	6d - CD4+ TEM	chr9-137240615-137241547	ENST00000340384	TUBB4B	ENSG00000188229	protein_coding	cds	chr9-137241361-137241417	0	5.92753e-08	-0.0860318	0.508	0.518	0.0122638	closed
CM vs HM	6 - NK + T	6d - CD4+ TEM	chr2-30171791-30173041	ENST00000402003	YPEL5	ENSG00000119801	protein_coding	utr	chr2-30158844-30160533	11257	5.99386e-08	0.261847	0.081	0.017	0.012401	open
CM vs HM	6 - NK + T	6d - CD4+ TEM	chr8-1817774-1818471	ENST00000636175	RP11-439C15.6	ENSG00000283239	protein_coding	gap	chr8-1771598-1843352	0	6.07829e-08	0.195909	0.045	0.012	0.0125757	open
CM vs HM	6 - NK + T	6d - CD4+ TEM	chr8-144465283-144466325	ENST00000533764	CYHR1	ENSG00000187954	protein_coding	utr	chr8-144465208-144465434	0	6.09436e-08	-0.0993487	0.442	0.46	0.0126089	closed
CM vs HM	6 - NK + T	6d - CD4+ TEM	chr14-91573609-91574743	ENST00000557036	CATSPERB	ENSG00000133962	protein_coding	utr	chr14-91580696-91581107	5952	6.21467e-08	0.269233	0.137	0.046	0.0128578	open
CM vs HM	6 - NK + T	6d - CD4+ TEM	chr19-38636567-38637586	ENST00000614624	EIF3K	ENSG00000178982	protein_coding	cds	chr19-38636889-38636920	0	6.74925e-08	-0.128715	0.127	0.156	0.0139639	closed
CM vs HM	6 - NK + T	6d - CD4+ TEM	chr2-121699106-121700173	ENST00000285814	NIFK	ENSG00000155438	protein_coding	utr	chr2-121726945-121727723	26771	7.09618e-08	0.235962	0.306	0.166	0.0146816	open
CM vs HM	6 - NK + T	6d - CD4+ TEM	chr22-45341166-45342115	ENST00000216214	FAM118A	ENSG00000100376	protein_coding	utr	chr22-45340406-45341955	0	7.09669e-08	0.124321	0.037	0.004	0.0146827	open
CM vs HM	6 - NK + T	6d - CD4+ TEM	chrX-149479991-149480685	ENST00000340855	IDS	ENSG00000010404	protein_coding	utr	chrX-149476990-149482745	0	7.11944e-08	0.153113	0.02	0	0.0147298	open
CM vs HM	6 - NK + T	6d - CD4+ TEM	chr3-129120201-129121118	ENST00000615093	RAB43	ENSG00000172780	protein_coding	gap	chr3-129095170-129121285	0	7.16251e-08	-0.112424	0.255	0.272	0.0148189	closed
CM vs HM	6 - NK + T	6d - CD4+ TEM	chr17-47253272-47254433	ENST00000571680	ITGB3	ENSG00000259207	protein_coding	cds	chr17-47253862-47253940	0	7.37528e-08	0.278055	0.121	0.04	0.0152591	open
CM vs HM	6 - NK + T	6d - CD4+ TEM	chr19-57769115-57770199	ENST00000599802	ZNF586	ENSG00000083828	protein_coding	cds	chr19-57769843-57769878	0	7.3985e-08	-0.104204	0.216	0.228	0.0153071	closed
CM vs HM	6 - NK + T	6d - CD4+ TEM	chr11-35387126-35388125	ENST00000606205	SLC1A2	ENSG00000110436	protein_coding	gap	chr11-35317517-35418949	0	7.50574e-08	0.187587	0.03	0.002	0.015529	open
CM vs HM	6 - NK + T	6d - CD4+ TEM	chr19-11434872-11435848	ENST00000591345	CCDC151	ENSG00000198003	protein_coding	cds	chr19-11434773-11435016	0	7.84962e-08	-0.0887378	0.531	0.54	0.0162405	closed
CM vs HM	6 - NK + T	6d - CD4+ TEM	chr12-76556094-76557075	ENST00000611266	OSBPL8	ENSG00000091039	protein_coding	gap	chr12-76487619-76559396	0	8.02092e-08	0.215249	0.075	0.018	0.0165949	open
CM vs HM	6 - NK + T	6d - CD4+ TEM	chr11-506175-507725	ENST00000533410	RNH1	ENSG00000023191	protein_coding	utr	chr11-507113-507218	0	8.05082e-08	-0.0849219	0.518	0.531	0.0166567	closed
CM vs HM	6 - NK + T	6d - CD4+ TEM	chr17-7306777-7307800	ENST00000336452	EIF5A	ENSG00000132507	protein_coding	cds	chr17-7307047-7307115	0	8.70527e-08	-0.0787067	0.56	0.564	0.0180108	closed
CM vs HM	6 - NK + T	6d - CD4+ TEM	chr19-17488572-17489696	ENST00000599380	SLC27A1	ENSG00000130304	protein_coding	cds	chr19-17488848-17488901	0	8.80158e-08	0.212186	0.081	0.019	0.01821	open
CM vs HM	6 - NK + T	6d - CD4+ TEM	chr14-68506471-68508497	ENST00000554244	RAD51B	ENSG00000182185	protein_coding	gap	chr14-68468251-68563549	0	8.80351e-08	0.263823	0.255	0.117	0.018214	open
CM vs HM	6 - NK + T	6d - CD4+ TEM	chr17-7483812-7484944	ENST00000617998	POLR2A	ENSG00000181222	protein_coding	cds	chr17-7484765-7484857	0	8.84634e-08	-0.0742366	0.554	0.538	0.0183026	closed
CM vs HM	6 - NK + T	6d - CD4+ TEM	chr13-20488914-20489835	ENST00000480748	CRYL1	ENSG00000165475	protein_coding	cds	chr13-20489370-20489436	0	8.90303e-08	0.185811	0.037	0.002	0.0184199	open
CM vs HM	6 - NK + T	6d - CD4+ TEM	chr2-38542522-38543600	ENST00000449105	HNRNPLL	ENSG00000143889	protein_coding	utr	chr2-38561978-38564181	18377	9.00666e-08	0.290306	0.143	0.053	0.0186343	open
CM vs HM	6 - NK + T	6d - CD4+ TEM	chr16-72658908-72659904	ENST00000624829	LINC01572	ENSG00000261008	lincRNA	gap	chr16-72570516-72664891	0	9.09029e-08	-0.130819	0.002	0.022	0.0188074	closed
CM vs HM	6 - NK + T	6d - CD4+ TEM	chr2-48343736-48344746	ENST00000413569	FOXN2	ENSG00000170802	protein_coding	gap	chr2-48314815-48346200	0	9.40767e-08	-0.124418	0.082	0.108	0.019464	closed
CM vs HM	6 - NK + T	6d - CD4+ TEM	chr12-122966012-122967005	ENST00000540285	ABCB9	ENSG00000150967	protein_coding	utr	chr12-122966287-122966500	0	9.52208e-08	-0.0990839	0.26	0.274	0.0197007	closed
CM vs HM	6 - NK + T	6d - CD4+ TEM	chr20-63553033-63553978	ENST00000615526	FNDC11	ENSG00000125531	protein_coding	utr	chr20-63553715-63555663	0	9.68343e-08	-0.122721	0.332	0.363	0.0200345	closed
CM vs HM	6 - NK + T	6d - CD4+ TEM	chr6-148203645-148204752	ENST00000417838	RP11-631F7.2	ENSG00000230205	lincRNA	exon	chr6-148137309-148137404	66240	9.98922e-08	-0.135666	0.051	0.085	0.0206672	closed
CM vs HM	6 - NK + T	6d - CD4+ TEM	chr3-183349946-183350950	ENST00000488149	MCF2L2	ENSG00000053524	protein_coding	gap	chr3-183341631-183379296	0	1.00022e-07	0.163246	0.068	0.015	0.020694	open
CM vs HM	6 - NK + T	6d - CD4+ TEM	chr6-139290389-139291256	ENST00000358430	TXLNB	ENSG00000164440	protein_coding	gap	chr6-139288914-139291920	0	1.04741e-07	-0.149575	0.102	0.149	0.0216705	closed
CM vs HM	6 - NK + T	6d - CD4+ TEM	chr14-105293880-105295035	ENST00000619151	BRF1	ENSG00000185024	protein_coding	gap	chr14-105286377-105300445	0	1.0845e-07	0.237165	0.14	0.049	0.0224378	open
CM vs HM	6 - NK + T	6d - CD4+ TEM	chr17-35900209-35901315	ENST00000604907	AC015849.16	ENSG00000270977	lincRNA	gap	chr17-35894324-35906167	0	1.14885e-07	0.185588	0.059	0.012	0.0237692	open
CM vs HM	6 - NK + T	6d - CD4+ TEM	chr16-352227-353573	ENST00000354866	AXIN1	ENSG00000103126	protein_coding	utr	chr16-352369-352449	0	1.21965e-07	-0.0969352	0.493	0.501	0.0252338	closed
CM vs HM	6 - NK + T	6d - CD4+ TEM	chr19-36972857-36974131	ENST00000592567	ZNF568	ENSG00000198453	protein_coding	utr	chr19-36973218-36973410	0	1.23047e-07	-0.104599	0.168	0.188	0.0254577	closed
CM vs HM	6 - NK + T	6d - CD4+ TEM	chr15-73920256-73921277	ENST00000566011	LOXL1	ENSG00000129038	protein_coding	exon	chr15-73925989-73927885	4711	1.23344e-07	-0.229652	0.043	0.084	0.0255192	closed
CM vs HM	6 - NK + T	6d - CD4+ TEM	chr17-335814-336788	ENST00000618002	RPH3AL	ENSG00000181031	protein_coding	gap	chr17-327580-352711	0	1.2667e-07	0.203816	0.065	0.01	0.0262073	open
CM vs HM	6 - NK + T	6d - CD4+ TEM	chr14-35203572-35204613	ENST00000605870	KIAA0391	ENSG00000100890	protein_coding	gap	chr14-35180778-35266726	0	1.27515e-07	-0.177226	0.089	0.126	0.0263822	closed
CM vs HM	6 - NK + T	6d - CD4+ TEM	chr7-100148369-100149364	ENST00000474141	LAMTOR4	ENSG00000188186	protein_coding	cds	chr7-100148973-100148975	0	1.3396e-07	-0.0822237	0.435	0.432	0.0277157	closed
CM vs HM	6 - NK + T	6d - CD4+ TEM	chr5-270930-272016	ENST00000628729	PDCD6	ENSG00000249915	protein_coding	cds	chr5-271721-271821	0	1.36579e-07	-0.0870077	0.472	0.468	0.0282575	closed
CM vs HM	6 - NK + T	6d - CD4+ TEM	chr2-127407659-127408976	ENST00000433673	AC068282.3	ENSG00000236682	lincRNA	exon	chr2-127397947-127400580	7078	1.37369e-07	0.284289	0.285	0.135	0.028421	open
CM vs HM	6 - NK + T	6d - CD4+ TEM	chr5-1536047-1537084	ENST00000503113	CTD-2245E15.3	ENSG00000251532	lincRNA	exon	chr5-1544107-1544216	7022	1.40464e-07	0.263692	0.188	0.079	0.0290613	open
CM vs HM	6 - NK + T	6d - CD4+ TEM	chr11-65888089-65889218	ENST00000533045	FIBP	ENSG00000172500	protein_coding	cds	chr11-65888343-65888418	0	1.42554e-07	-0.0929453	0.277	0.291	0.0294938	closed
CM vs HM	6 - NK + T	6d - CD4+ TEM	chr11-18411795-18412812	ENST00000546146	LDHC	ENSG00000166796	protein_coding	cds	chr11-18412718-18412843	0	1.44979e-07	0.180786	0.051	0.014	0.0299955	open
CM vs HM	6 - NK + T	6d - CD4+ TEM	chr17-45161216-45162250	ENST00000593138	HEXIM2	ENSG00000168517	protein_coding	utr	chr17-45161078-45161248	0	1.45503e-07	-0.0797428	0.433	0.425	0.0301039	closed
CM vs HM	6 - NK + T	6d - CD4+ TEM	chr11-47862935-47863901	ENST00000526870	NUP160	ENSG00000030066	protein_coding	exon	chr11-47848219-47848555	14379	1.50572e-07	-0.150174	0.059	0.091	0.0311526	closed
CM vs HM	6 - NK + T	6d - CD4+ TEM	chr14-23352363-23353374	ENST00000636431	SLC22A17	ENSG00000092096	protein_coding	cds	chr14-23352646-23352741	0	1.51512e-07	0.276813	0.111	0.034	0.031347	open
CM vs HM	6 - NK + T	6d - CD4+ TEM	chr19-37317291-37318280	ENST00000589801	HKR1	ENSG00000181666	protein_coding	utr	chr19-37318039-37318186	0	1.5182e-07	-0.0902822	0.383	0.392	0.0314108	closed
CM vs HM	6 - NK + T	6d - CD4+ TEM	chr19-40425487-40426437	ENST00000357949	SERTAD1	ENSG00000197019	protein_coding	utr	chr19-40425867-40426025	0	1.56148e-07	-0.0743934	0.497	0.484	0.0323063	closed
CM vs HM	6 - NK + T	6d - CD4+ TEM	chr17-21284077-21285017	ENST00000627447	MAP2K3	ENSG00000034152	protein_coding	cds	chr17-21284921-21284969	0	1.57426e-07	-0.113981	0.335	0.358	0.0325706	closed
CM vs HM	6 - NK + T	6d - CD4+ TEM	chr3-158644061-158645044	ENST00000486715	GFM1	ENSG00000168827	protein_coding	cds	chr3-158644635-158644715	0	1.7312e-07	-0.0940322	0.234	0.24	0.0358177	closed
CM vs HM	6 - NK + T	6d - CD4+ TEM	chr3-183789489-183790431	ENST00000432781	YEATS2	ENSG00000163872	protein_coding	gap	chr3-183786302-183790796	0	1.73442e-07	-0.119945	0.002	0.019	0.0358844	closed
CM vs HM	6 - NK + T	6d - CD4+ TEM	chr17-75154119-75155116	ENST00000581874	HN1	ENSG00000189159	protein_coding	cds	chr17-75154342-75154397	0	1.77339e-07	-0.0994795	0.351	0.375	0.0366907	closed
CM vs HM	6 - NK + T	6d - CD4+ TEM	chr6-137880633-137881769	ENST00000619035	TNFAIP3	ENSG00000118503	protein_coding	cds	chr6-137881163-137881198	0	1.77483e-07	0.268657	0.159	0.061	0.0367203	open
CM vs HM	6 - NK + T	6d - CD4+ TEM	chr1-234213718-234215040	ENST00000366617	SLC35F3	ENSG00000183780	protein_coding	cds	chr1-234214499-234214574	0	1.78436e-07	0.258979	0.086	0.022	0.0369174	open
CM vs HM	6 - NK + T	6d - CD4+ TEM	chr20-1588277-1589195	ENST00000567028	RP4-576H24.4	ENSG00000260861	protein_coding	cds	chr20-1588560-1588632	0	1.80092e-07	0.25926	0.066	0.011	0.0372602	open
CM vs HM	6 - NK + T	6d - CD4+ TEM	chr14-102139193-102140257	ENST00000558600	HSP90AA1	ENSG00000080824	protein_coding	cds	chr14-102139250-102139404	0	1.84769e-07	-0.0814671	0.409	0.406	0.0382278	closed
CM vs HM	6 - NK + T	6d - CD4+ TEM	chr19-52189398-52190467	ENST00000628959	PPP2R1A	ENSG00000105568	protein_coding	cds	chr19-52190097-52190174	0	1.88938e-07	-0.0839196	0.672	0.666	0.0390903	closed
CM vs HM	6 - NK + T	6d - CD4+ TEM	chr8-100913515-100914447	ENST00000395957	YWHAZ	ENSG00000164924	protein_coding	utr	chr8-100916525-100920692	2077	1.92133e-07	0.217077	0.044	0.007	0.0397515	open
CM vs HM	6 - NK + T	6d - CD4+ TEM	chr20-52438037-52439085	ENST00000454600	LINC01524	ENSG00000234948	lincRNA	gap	chr20-52355360-52530887	0	1.95167e-07	0.172333	0.028	0.002	0.0403792	open
CM vs HM	6 - NK + T	6d - CD4+ TEM	chr19-14518102-14519144	ENST00000254322	DNAJB1	ENSG00000132002	protein_coding	cds	chr19-14518139-14518349	0	2.04115e-07	-0.0771867	0.524	0.513	0.0422304	closed
CM vs HM	6 - NK + T	6d - CD4+ TEM	chr12-25859640-25860642	ENST00000544399	RP11-443N24.4	ENSG00000256256	lincRNA	exon	chr12-25882955-25883309	22312	2.08578e-07	0.124058	0.059	0.009	0.0431538	open
CM vs HM	6 - NK + T	6d - CD4+ TEM	chr18-48928529-48929585	ENST00000591805	SMAD7	ENSG00000101665	protein_coding	gap	chr18-48921911-48942480	0	2.10561e-07	0.263316	0.261	0.124	0.0435639	open
CM vs HM	6 - NK + T	6d - CD4+ TEM	chr22-50507484-50508504	ENST00000523045	NCAPH2	ENSG00000025770	protein_coding	cds	chr22-50508338-50508445	0	2.14229e-07	-0.0686416	0.472	0.46	0.0443229	closed
CM vs HM	6 - NK + T	6d - CD4+ TEM	chr19-50607424-50608767	ENST00000595557	SYT3	ENSG00000213023	protein_coding	utr	chr19-50621307-50621428	12539	2.1967e-07	-0.124224	0.015	0.037	0.0454486	closed
CM vs HM	6 - NK + T	6d - CD4+ TEM	chr22-32137475-32138639	ENST00000436294	RP1-127L4.7	ENSG00000239674	lincRNA	exon	chr22-32141267-32141339	2627	2.19952e-07	-0.155314	0.07	0.101	0.0455069	closed
CM vs HM	6 - NK + T	6d - CD4+ TEM	chr1-161158989-161159971	ENST00000492950	USP21	ENSG00000143258	protein_coding	utr	chr1-161159450-161159678	0	2.25201e-07	-0.0849111	0.236	0.24	0.0465929	closed
CM vs HM	6 - NK + T	6d - CD4+ TEM	chr3-46538442-46539593	ENST00000395905	LRRC2	ENSG00000163827	protein_coding	cds	chr3-46539045-46539201	0	2.31456e-07	0.22864	0.359	0.2	0.047887	open
CM vs HM	6 - NK + T	6d - CD4+ TEM	chr19-16586719-16588102	ENST00000598492	MED26	ENSG00000105085	protein_coding	utr	chr19-16587404-16587601	0	2.32178e-07	0.284126	0.2	0.079	0.0480364	open
CM vs HM	6 - NK + T	6d - CD4+ TEM	chr1-202861061-202862180	ENST00000367262	RABIF	ENSG00000183155	protein_coding	utr	chr1-202878957-202880977	16776	2.34554e-07	0.21215	0.084	0.027	0.048528	open
CM vs HM	6 - NK + T	6d - CD4+ TEM	chr8-133067979-133069185	ENST00000524345	SLA	ENSG00000155926	protein_coding	gap	chr8-133050916-133102552	0	2.40192e-07	0.238705	0.264	0.129	0.0496945	open
CM vs HM	6 - NK + T	6g - CD8+ TN	chr13-73715195-73716273	ENST00000377669	KLF12	ENSG00000118922	protein_coding	cds	chr13-73715368-73715525	0	2.92836e-25	0.392633	0.177	0.032	6.05862e-20	open
CM vs HM	6 - NK + T	6g - CD8+ TN	chr7-4204527-4205444	ENST00000615806	SDK1	ENSG00000146555	protein_coding	gap	chr7-4178587-4205878	0	1.45734e-22	0.353247	0.069	0	3.01515e-17	open
CM vs HM	6 - NK + T	6g - CD8+ TN	chr9-39809189-39810297	ENST00000627065	GLIDR	ENSG00000278175	lincRNA	gap	chr9-39809616-39809730	0	1.56731e-21	-0.414341	0.031	0.147	3.24269e-16	closed
CM vs HM	6 - NK + T	6g - CD8+ TN	chr19-9818868-9819839	ENST00000592067	FBXL12	ENSG00000127452	protein_coding	utr	chr19-9818814-9819079	0	3.71533e-20	-0.231644	0.522	0.685	7.68683e-15	closed
CM vs HM	6 - NK + T	6g - CD8+ TN	chr2-96838948-96840071	ENST00000418232	ANKRD23	ENSG00000163126	protein_coding	cds	chr2-96839997-96840095	0	8.3878e-19	-0.348929	0.099	0.223	1.73539e-13	closed
CM vs HM	6 - NK + T	6g - CD8+ TN	chr2-241881160-241882305	ENST00000457686	LINC01237	ENSG00000233806	processed_transcript	gap	chr2-241881475-241882559	0	5.71984e-16	-0.232481	0.493	0.627	1.18341e-10	closed
CM vs HM	6 - NK + T	6g - CD8+ TN	chr10-30751568-30752544	ENST00000416310	RP11-14C22.6	ENSG00000230720	lincRNA	exon	chr10-30723419-30723740	27827	9.61859e-16	0.288571	0.057	0.002	1.99004e-10	open
CM vs HM	6 - NK + T	6g - CD8+ TN	chr10-132537096-132538423	ENST00000423490	INPP5A	ENSG00000068383	protein_coding	cds	chr10-132538139-132538171	0	1.20523e-14	-0.193628	0.546	0.691	2.49356e-09	closed
CM vs HM	6 - NK + T	6g - CD8+ TN	chr12-52585667-52586683	ENST00000537672	KRT72	ENSG00000170486	protein_coding	cds	chr12-52585982-52586172	0	2.5426e-14	0.344758	0.291	0.139	5.26051e-09	open
CM vs HM	6 - NK + T	6g - CD8+ TN	chr22-45341166-45342115	ENST00000216214	FAM118A	ENSG00000100376	protein_coding	utr	chr22-45340406-45341955	0	3.13947e-14	0.32928	0.118	0.029	6.49541e-09	open
CM vs HM	6 - NK + T	6g - CD8+ TN	chr2-113234994-113236052	ENST00000465084	PAX8	ENSG00000125618	protein_coding	cds	chr2-113235394-113235443	0	3.89771e-14	0.254486	0.061	0.004	8.06418e-09	open
CM vs HM	6 - NK + T	6g - CD8+ TN	chr22-45336692-45337821	ENST00000483102	FAM118A	ENSG00000100376	protein_coding	gap	chr22-45336412-45340385	0	4.62033e-14	0.324447	0.121	0.028	9.55923e-09	open
CM vs HM	6 - NK + T	6g - CD8+ TN	chr11-692552-693535	ENST00000529717	DEAF1	ENSG00000177030	protein_coding	gap	chr11-691599-694678	0	5.79911e-14	0.336039	0.197	0.071	1.19981e-08	open
CM vs HM	6 - NK + T	6g - CD8+ TN	chr1-166988742-166989637	ENST00000447624	MAEL	ENSG00000143194	protein_coding	cds	chr1-166989353-166989484	0	1.5151e-13	-0.294821	0.003	0.052	3.13467e-08	closed
CM vs HM	6 - NK + T	6g - CD8+ TN	chr13-73702217-73703300	ENST00000377669	KLF12	ENSG00000118922	protein_coding	gap	chr13-73695672-73715367	0	2.98454e-13	0.288042	0.215	0.084	6.17486e-08	open
CM vs HM	6 - NK + T	6g - CD8+ TN	chr3-93470147-93471082	ENST00000394236	PROS1	ENSG00000184500	protein_coding	utr	chr3-93873033-93874244	401950	4.28122e-12	0.250172	0.404	0.249	8.85762e-07	open
CM vs HM	6 - NK + T	6g - CD8+ TN	chr2-231425695-231426658	ENST00000287590	B3GNT7	ENSG00000156966	protein_coding	utr	chr2-231398926-231401164	24530	4.40058e-12	0.185818	0.054	0.004	9.10459e-07	open
CM vs HM	6 - NK + T	6g - CD8+ TN	chr11-64916907-64917832	ENST00000421419	ATG2A	ENSG00000110046	protein_coding	cds	chr11-64916965-64917127	0	7.72508e-12	-0.196289	0.4	0.518	1.59828e-06	closed
CM vs HM	6 - NK + T	6g - CD8+ TN	chr8-1854670-1855464	ENST00000636175	RP11-439C15.6	ENSG00000283239	protein_coding	gap	chr8-1843437-1857959	0	8.28454e-12	0.266274	0.034	0	1.71403e-06	open
CM vs HM	6 - NK + T	6g - CD8+ TN	chr1-1918913-1919974	ENST00000470931	TMEM52	ENSG00000178821	protein_coding	cds	chr1-1919182-1919265	0	9.34997e-12	-0.200628	0.427	0.551	1.93446e-06	closed
CM vs HM	6 - NK + T	6g - CD8+ TN	chr11-66312096-66313158	ENST00000311330	CD248	ENSG00000174807	protein_coding	utr	chr11-66314487-66314753	1328	1.05397e-11	-0.155457	0.646	0.762	2.18061e-06	closed
CM vs HM	6 - NK + T	6g - CD8+ TN	chr3-125915785-125916802	ENST00000626312	RP11-379B18.5	ENSG00000241288	processed_transcript	gap	chr3-125915476-125916283	0	1.27117e-11	-0.166511	0.598	0.729	2.62998e-06	closed
CM vs HM	6 - NK + T	6g - CD8+ TN	chr12-104695107-104696239	ENST00000549260	CHST11	ENSG00000171310	protein_coding	gap	chr12-104601992-104756948	0	1.39667e-11	-0.299367	0.066	0.153	2.88964e-06	closed
CM vs HM	6 - NK + T	6g - CD8+ TN	chr12-25958121-25959256	ENST00000615708	RASSF8	ENSG00000123094	protein_coding	utr	chr12-25959065-25959148	0	1.71514e-11	0.218455	0.05	0.004	3.54854e-06	open
CM vs HM	6 - NK + T	6g - CD8+ TN	chr9-136790625-136791576	ENST00000456614	RP11-216L13.17	ENSG00000272896	protein_coding	cds	chr9-136791379-136791424	0	1.8608e-11	-0.169931	0.54	0.657	3.8499e-06	closed
CM vs HM	6 - NK + T	6g - CD8+ TN	chr11-64304799-64306022	ENST00000539594	ESRRA	ENSG00000173153	protein_coding	utr	chr11-64305580-64305736	0	2.60498e-11	-0.185674	0.439	0.534	5.38958e-06	closed
CM vs HM	6 - NK + T	6g - CD8+ TN	chr9-40991714-40992787	ENST00000613309	PGM5-AS1	ENSG00000225655	lincRNA	exon	chr9-41073710-41073973	80922	2.66927e-11	-0.174125	0.505	0.622	5.52259e-06	closed
CM vs HM	6 - NK + T	6g - CD8+ TN	chr3-194687474-194688621	ENST00000329759	FAM43A	ENSG00000185112	protein_coding	cds	chr3-194686827-194688098	0	2.7675e-11	0.252809	0.128	0.038	5.72582e-06	open
CM vs HM	6 - NK + T	6g - CD8+ TN	chr14-24141192-24142148	ENST00000560600	EMC9	ENSG00000100908	protein_coding	cds	chr14-24141107-24141304	0	3.22667e-11	-0.203095	0.385	0.501	6.67582e-06	closed
CM vs HM	6 - NK + T	6g - CD8+ TN	chr19-55461019-55462307	ENST00000589080	ISOC2	ENSG00000063241	protein_coding	utr	chr19-55461512-55461626	0	5.11986e-11	-0.193577	0.389	0.501	1.05927e-05	closed
CM vs HM	6 - NK + T	6g - CD8+ TN	chr19-18271054-18271948	ENST00000612316	KIAA1683	ENSG00000130518	protein_coding	gap	chr19-18269588-18274402	0	5.30269e-11	0.287226	0.089	0.018	1.0971e-05	open
CM vs HM	6 - NK + T	6g - CD8+ TN	chr21-36156008-36157029	ENST00000270190	DOPEY2	ENSG00000142197	protein_coding	utr	chr21-36156782-36156943	0	6.91125e-11	-0.157503	0.595	0.699	1.4299e-05	closed
CM vs HM	6 - NK + T	6g - CD8+ TN	GL000219.1-42149-43319	NA	NA	NA	NA	NA	NA	NA	7.68042e-11	0.248754	0.203	0.083	1.58904e-05	open
CM vs HM	6 - NK + T	6g - CD8+ TN	chr11-64185491-64186620	ENST00000543847	STIP1	ENSG00000168439	protein_coding	cds	chr11-64186262-64186270	0	7.77357e-11	-0.159094	0.557	0.663	1.60831e-05	closed
CM vs HM	6 - NK + T	6g - CD8+ TN	chr6-52393923-52394976	ENST00000637849	EFHC1	ENSG00000096093	protein_coding	gap	chr6-52362250-52423945	0	1.07149e-10	-0.291897	0.046	0.121	2.21687e-05	closed
CM vs HM	6 - NK + T	6g - CD8+ TN	chr22-18528382-18529603	ENST00000613577	TMEM191B	ENSG00000278558	protein_coding	cds	chr22-18529441-18529497	0	1.59765e-10	0.256255	0.269	0.144	3.30545e-05	open
CM vs HM	6 - NK + T	6g - CD8+ TN	chr14-101760239-101761168	ENST00000422945	PPP2R5C	ENSG00000078304	protein_coding	exon	chr14-101761798-101761920	629	1.70139e-10	-0.17416	0.475	0.575	3.52009e-05	closed
CM vs HM	6 - NK + T	6g - CD8+ TN	chr2-203704829-203705717	ENST00000374481	CD28	ENSG00000178562	protein_coding	exon	chr2-203706475-203706748	757	1.74362e-10	-0.287448	0.082	0.16	3.60747e-05	closed
CM vs HM	6 - NK + T	6g - CD8+ TN	chr4-781515-782502	ENST00000304062	CPLX1	ENSG00000168993	protein_coding	utr	chr4-784957-786500	2454	1.89172e-10	-0.178157	0.437	0.558	3.91388e-05	closed
CM vs HM	6 - NK + T	6g - CD8+ TN	chr16-50334945-50335980	ENST00000475877	BRD7	ENSG00000166164	protein_coding	gap	chr16-50334896-50339975	0	2.26313e-10	-0.244632	0.023	0.088	4.6823e-05	closed
CM vs HM	6 - NK + T	6g - CD8+ TN	chr12-11546987-11547869	ENST00000536492	RP11-434C1.2	ENSG00000256237	lincRNA	gap	chr12-11541527-11555782	0	2.33885e-10	-0.231441	0.005	0.048	4.83897e-05	closed
CM vs HM	6 - NK + T	6g - CD8+ TN	chr16-56860070-56861102	ENST00000438926	SLC12A3	ENSG00000070915	protein_coding	exon	chr16-56865207-56865517	4104	2.39091e-10	0.247336	0.072	0.014	4.94667e-05	open
CM vs HM	6 - NK + T	6g - CD8+ TN	chr16-50338593-50339699	ENST00000475877	BRD7	ENSG00000166164	protein_coding	gap	chr16-50334896-50339975	0	2.44329e-10	-0.243704	0.021	0.083	5.05504e-05	closed
CM vs HM	6 - NK + T	6g - CD8+ TN	chr4-145481343-145483365	ENST00000515385	SMAD1	ENSG00000170365	protein_coding	utr	chr4-145482811-145483176	0	2.63617e-10	0.209762	0.067	0.011	5.45411e-05	open
CM vs HM	6 - NK + T	6g - CD8+ TN	chr1-30717922-30718914	ENST00000373765	MATN1	ENSG00000162510	protein_coding	cds	chr1-30718735-30718957	0	3.18944e-10	-0.146972	0.641	0.733	6.5988e-05	closed
CM vs HM	6 - NK + T	6g - CD8+ TN	chr7-38348946-38350474	ENST00000609522	RP11-121A8.1	ENSG00000272908	lincRNA	exon	chr7-38329240-38329643	19302	4.75486e-10	-0.220473	0.014	0.063	9.83756e-05	closed
CM vs HM	6 - NK + T	6g - CD8+ TN	chr12-63668177-63669228	ENST00000542209	DPY19L2	ENSG00000177990	protein_coding	cds	chr12-63668122-63668393	0	5.22249e-10	0.277264	0.1	0.029	0.000108051	open
CM vs HM	6 - NK + T	6g - CD8+ TN	chr7-44082164-44083206	ENST00000458246	POLM	ENSG00000122678	protein_coding	cds	chr7-44082251-44082438	0	6.60779e-10	-0.164187	0.495	0.606	0.000136712	closed
CM vs HM	6 - NK + T	6g - CD8+ TN	chr17-48892110-48893153	ENST00000514808	ATP5G1	ENSG00000159199	protein_coding	utr	chr17-48892802-48892840	0	7.06682e-10	-0.165169	0.453	0.555	0.000146209	closed
[truncated: 1,442 more rows]

## Sheet: Full_DA_Peak_List_CB1_vs_HB1
comparison_group	major_cell_type	minor_cell_type	peak_name	tx_id	gene_name	gene_id	gene_biotype	type	closest_region	distance	p_val	avg_log2FC	pct.1	pct.2	p_val_adj	trend
CB1 vs HB1	4 - Mono	4a - CD14+ Mono	chr22-18528382-18529603	ENST00000613577	TMEM191B	ENSG00000278558	protein_coding	cds	chr22-18529441-18529497	0	5.99566e-39	0.449892	0.169	0.053	1.24047e-33	open
CB1 vs HB1	4 - Mono	4a - CD14+ Mono	chr18-22323937-22325154	ENST00000608890	RP11-535A5.1	ENSG00000273348	lincRNA	exon	chr18-22347846-22348252	22691	2.00633e-11	-0.17582	0.013	0.047	4.15099e-06	closed
CB1 vs HB1	4 - Mono	4a - CD14+ Mono	chr12-114762278-114763292	ENST00000551875	RP4-601P9.2	ENSG00000257817	lincRNA	gap	chr12-114748211-114767283	0	2.20224e-10	0.222098	0.057	0.015	4.55633e-05	open
CB1 vs HB1	4 - Mono	4a - CD14+ Mono	chr7-102671308-102672234	ENST00000476151	RP11-577H5.5	ENSG00000267645	protein_coding	cds	chr7-102671552-102671601	0	4.01717e-09	-0.133248	0.004	0.026	0.000831132	closed
CB1 vs HB1	4 - Mono	4a - CD14+ Mono	chr2-123073072-123074063	ENST00000432894	AC062020.1	ENSG00000232740	lincRNA	gap	chr2-123070365-123073151	0	4.21657e-09	0.157989	0.029	0.005	0.000872388	open
CB1 vs HB1	4 - Mono	4a - CD14+ Mono	chr21-8234021-8234951	ENST00000623664	CH507-513H4.1	ENSG00000278996	lincRNA	exon	chr21-8227180-8227646	6374	6.65179e-09	0.193195	0.05	0.016	0.00137622	open
CB1 vs HB1	4 - Mono	4a - CD14+ Mono	chr4-184329673-184330690	ENST00000317596	RP11-290F5.2	ENSG00000180712	lincRNA	exon	chr4-184340756-184342053	10065	6.98613e-09	0.156166	0.057	0.021	0.00144539	open
CB1 vs HB1	4 - Mono	4a - CD14+ Mono	chr5-115940777-115941912	ENST00000504467	LVRN	ENSG00000172901	protein_coding	exon	chr5-115962454-115963312	20541	1.26375e-08	-0.172746	0.01	0.036	0.00261463	closed
CB1 vs HB1	4 - Mono	4a - CD14+ Mono	chr7-901102-902221	ENST00000617043	ADAP1	ENSG00000105963	protein_coding	gap	chr7-900617-904125	0	1.95579e-08	-0.183893	0.079	0.128	0.00404644	closed
CB1 vs HB1	4 - Mono	4a - CD14+ Mono	chr6-44820005-44821203	ENST00000475057	SUPT3H	ENSG00000196284	protein_coding	gap	chr6-44809502-44829763	0	2.00162e-08	0.118285	0.019	0.001	0.00414126	open
CB1 vs HB1	4 - Mono	4a - CD14+ Mono	chr2-172515958-172516951	ENST00000409080	ITGA6	ENSG00000091409	protein_coding	utr	chr2-172504253-172506282	9675	3.13763e-08	0.117891	0.017	0.001	0.0064916	open
CB1 vs HB1	4 - Mono	4a - CD14+ Mono	chr10-6238925-6239967	ENST00000536985	PFKFB3	ENSG00000170525	protein_coding	utr	chr10-6232943-6235545	3379	4.23502e-08	0.185536	0.062	0.026	0.00876204	open
CB1 vs HB1	4 - Mono	4a - CD14+ Mono	chr1-153633613-153634636	ENST00000614256	CHTOP	ENSG00000160679	protein_coding	utr	chr1-153633982-153634343	0	4.87469e-08	-0.156068	0.159	0.214	0.0100855	closed
CB1 vs HB1	4 - Mono	4a - CD14+ Mono	chr21-5065266-5066245	ENST00000625036	CH507-9B2.3	ENSG00000280071	protein_coding	cds	chr21-5079294-5079296	13048	7.34284e-08	-0.112972	0.002	0.019	0.015192	closed
CB1 vs HB1	4 - Mono	4a - CD14+ Mono	chr4-3045165-3046123	ENST00000504933	GRK4	ENSG00000125388	protein_coding	utr	chr4-3040626-3040747	4417	7.38624e-08	-0.149862	0.047	0.081	0.0152818	closed
CB1 vs HB1	4 - Mono	4a - CD14+ Mono	chr6-37697613-37698582	ENST00000434837	MDGA1	ENSG00000112139	protein_coding	utr	chr6-37696812-37697990	0	7.49413e-08	0.144387	0.039	0.012	0.015505	open
CB1 vs HB1	4 - Mono	4a - CD14+ Mono	chr21-44195918-44196865	ENST00000423967	AP001058.3	ENSG00000232698	lincRNA	exon	chr21-44206525-44206790	9659	8.23709e-08	0.117168	0.021	0.003	0.0170421	open
CB1 vs HB1	4 - Mono	4a - CD14+ Mono	chr1-224235428-224236550	ENST00000482491	NVL	ENSG00000143748	protein_coding	cds	chr1-224236506-224236582	0	1.00535e-07	-0.097087	0.001	0.014	0.0208002	closed
CB1 vs HB1	4 - Mono	4a - CD14+ Mono	chr19-4327992-4328977	ENST00000600324	STAP2	ENSG00000178078	protein_coding	cds	chr19-4328675-4328809	0	1.11714e-07	-0.159817	0.103	0.15	0.0231132	closed
CB1 vs HB1	4 - Mono	4a - CD14+ Mono	chr1-628755-630979	ENST00000635509	RP5-857K21.4	ENSG00000230021	lincRNA	gap	chr1-601578-711710	0	1.33472e-07	0.182322	0.058	0.027	0.0276147	open
CB1 vs HB1	4 - Mono	4a - CD14+ Mono	chr1-38012140-38013135	ENST00000373014	UTP11	ENSG00000183520	protein_coding	cds	chr1-38012803-38012865	0	1.47091e-07	-0.150105	0.106	0.148	0.0304324	closed
CB1 vs HB1	4 - Mono	4a - CD14+ Mono	chr3-185937644-185938652	ENST00000456380	TRA2B	ENSG00000136527	protein_coding	cds	chr3-185937825-185937860	0	1.50114e-07	-0.143605	0.166	0.218	0.0310578	closed
CB1 vs HB1	4 - Mono	4a - CD14+ Mono	chr5-67998444-67999568	ENST00000510621	RP11-83M16.6	ENSG00000250421	lincRNA	exon	chr5-67902544-67902600	95843	1.74915e-07	-0.165495	0.109	0.159	0.036189	closed
CB1 vs HB1	4 - Mono	4a - CD14+ Mono	chr11-35214495-35215547	ENST00000526000	CD44	ENSG00000026508	protein_coding	cds	chr11-35214852-35214861	0	2.25204e-07	0.177875	0.109	0.059	0.0465937	open
CB1 vs HB1	4 - Mono	4a - CD14+ Mono	chr5-180313412-180314453	ENST00000253778	GFPT2	ENSG00000131459	protein_coding	cds	chr5-180313807-180313964	0	2.27528e-07	-0.121803	0.008	0.028	0.0470743	closed
CB1 vs HB1	4 - Mono	4b - Int Mono	chr10-118729214-118730321	ENST00000493518	CACUL1	ENSG00000151893	protein_coding	cds	chr10-118730284-118730410	0	2.08266e-08	-0.291002	0.027	0.092	0.00430893	closed
CB1 vs HB1	5 - B cells	/	chr8-8227498-8228922	ENST00000594215	RP11-556O5.6	ENSG00000268955	lincRNA	exon	chr8-8188535-8189195	38302	2.4357e-35	-0.367829	0.156	0.303	5.03935e-30	closed
CB1 vs HB1	5 - B cells	/	chr22-18528382-18529603	ENST00000613577	TMEM191B	ENSG00000278558	protein_coding	cds	chr22-18529441-18529497	0	1.55047e-27	0.425748	0.246	0.086	3.20785e-22	open
CB1 vs HB1	5 - B cells	/	chr7-102671308-102672234	ENST00000476151	RP11-577H5.5	ENSG00000267645	protein_coding	cds	chr7-102671552-102671601	0	3.60247e-24	-0.275548	0.005	0.071	7.45333e-19	closed
CB1 vs HB1	5 - B cells	/	chr18-76990533-76991588	ENST00000483025	MBP	ENSG00000197971	protein_coding	cds	chr18-76990891-76990914	0	4.93289e-20	0.333242	0.069	0.005	1.02059e-14	open
CB1 vs HB1	5 - B cells	/	chr12-47426472-47427590	ENST00000552320	RP1-90J4.1	ENSG00000257906	lincRNA	exon	chr12-47419922-47420179	6292	3.42087e-14	-0.199779	0.001	0.027	7.07761e-09	closed
CB1 vs HB1	5 - B cells	/	chr1-628755-630979	ENST00000635509	RP5-857K21.4	ENSG00000230021	lincRNA	gap	chr1-601578-711710	0	9.81177e-14	0.264578	0.118	0.055	2.03001e-08	open
CB1 vs HB1	5 - B cells	/	chr14-59107481-59108508	ENST00000556596	DAAM1	ENSG00000100592	protein_coding	exon	chr14-59188646-59188768	80137	2.79248e-12	-0.235326	0.007	0.045	5.77751e-07	closed
CB1 vs HB1	5 - B cells	/	KI270713.1-36858-37864	NA	NA	NA	NA	NA	NA	NA	1.17393e-11	-0.224205	0.019	0.066	2.4288e-06	closed
CB1 vs HB1	5 - B cells	/	chr13-49619779-49620805	ENST00000282026	ARL11	ENSG00000152213	protein_coding	exon	chr13-49628299-49628615	7493	3.95681e-11	0.278882	0.063	0.007	8.18645e-06	open
CB1 vs HB1	5 - B cells	/	chr1-15524124-15525283	ENST00000546424	CASP9	ENSG00000132906	protein_coding	cds	chr1-15524069-15524200	0	2.41934e-10	-0.10482	0.462	0.472	5.0055e-05	closed
CB1 vs HB1	5 - B cells	/	chr2-148880386-148882232	ENST00000435030	KIF5C	ENSG00000168280	protein_coding	gap	chr2-148875744-148922136	0	5.16678e-10	-0.186797	0	0.026	0.000106898	closed
CB1 vs HB1	5 - B cells	/	chr12-9283130-9284365	ENST00000538219	RP11-118B22.4	ENSG00000256427	lincRNA	exon	chr12-9257923-9257960	25169	1.03355e-09	-0.191721	0.035	0.086	0.000213837	closed
CB1 vs HB1	5 - B cells	/	chr7-24718669-24719766	ENST00000446822	DFNA5	ENSG00000105928	protein_coding	cds	chr7-24719047-24719096	0	1.61225e-09	0.264474	0.183	0.084	0.000333567	open
CB1 vs HB1	5 - B cells	/	chr4-6590938-6592052	ENST00000505907	MAN2B2	ENSG00000013288	protein_coding	gap	chr4-6589161-6593172	0	2.87135e-09	-0.175822	0.073	0.11	0.000594067	closed
CB1 vs HB1	5 - B cells	/	chr17-22520816-22522225	ENST00000540040	MTRNR2L1	ENSG00000256618	protein_coding	exon	chr17-22523111-22524663	885	3.01827e-09	0.200413	0.123	0.07	0.000624465	open
CB1 vs HB1	5 - B cells	/	chr9-177963-179655	ENST00000616944	CBWD1	ENSG00000172785	protein_coding	cds	chr9-178816-178969	0	5.77008e-09	-0.112383	0.013	0.032	0.0011938	closed
CB1 vs HB1	5 - B cells	/	chr12-11546987-11547869	ENST00000536492	RP11-434C1.2	ENSG00000256237	lincRNA	gap	chr12-11541527-11555782	0	6.29561e-09	-0.125522	0.003	0.022	0.00130253	closed
CB1 vs HB1	5 - B cells	/	chr17-80876803-80877976	ENST00000577161	RPTOR	ENSG00000141564	protein_coding	gap	chr17-80857901-80880414	0	6.32176e-09	-0.172944	0.025	0.054	0.00130794	closed
CB1 vs HB1	5 - B cells	/	chr21-44195918-44196865	ENST00000423967	AP001058.3	ENSG00000232698	lincRNA	exon	chr21-44206525-44206790	9659	8.14923e-09	0.182459	0.043	0.004	0.00168604	open
CB1 vs HB1	5 - B cells	/	chrX-1661063-1662149	ENST00000432523	ASMT	ENSG00000196433	protein_coding	utr	chrX-1643015-1643081	17981	1.17713e-08	-0.165384	0.155	0.167	0.00243542	closed
CB1 vs HB1	5 - B cells	/	chr16-46394211-46395213	ENST00000303383	SHCBP1	ENSG00000171241	protein_coding	utr	chr16-46580554-46581728	185340	2.41736e-08	-0.264277	0.055	0.104	0.0050014	closed
CB1 vs HB1	5 - B cells	/	KI270713.1-21334-22393	NA	NA	NA	NA	NA	NA	NA	4.02491e-08	-0.158244	0.181	0.236	0.00832734	closed
CB1 vs HB1	5 - B cells	/	chr14-37171839-37172839	ENST00000555449	SLC25A21	ENSG00000183032	protein_coding	cds	chr14-37172281-37172350	0	5.06168e-08	0.172228	0.022	0.001	0.0104724	open
CB1 vs HB1	5 - B cells	/	chr5-179559181-179560226	ENST00000502984	RUFY1	ENSG00000176783	protein_coding	cds	chr5-179560025-179560198	0	6.88481e-08	-0.159254	0.083	0.131	0.0142443	closed
CB1 vs HB1	5 - B cells	/	chrX-1452526-1453654	ENST00000381333	ASMTL	ENSG00000169093	protein_coding	cds	chrX-1452748-1452840	0	8.87368e-08	-0.105693	0.403	0.416	0.0183592	closed
CB1 vs HB1	5 - B cells	/	chr17-41308177-41309185	ENST00000391352	KRTAP16-1	ENSG00000212657	protein_coding	cds	chr17-41307700-41309253	0	9.78958e-08	0.250824	0.29	0.15	0.0202541	open
CB1 vs HB1	5 - B cells	/	chr5-124951604-124952741	ENST00000509456	RP11-284A20.1	ENSG00000249423	lincRNA	exon	chr5-124921571-124921598	30005	1.07171e-07	-0.138883	0.058	0.079	0.0221731	closed
CB1 vs HB1	5 - B cells	/	chr6-41228134-41229462	ENST00000461240	TREML4	ENSG00000188056	protein_coding	cds	chr6-41228955-41229044	0	1.23143e-07	0.211688	0.034	0.002	0.0254777	open
CB1 vs HB1	6 - NK + T	6a - CD4+ TN	chr7-102671308-102672234	ENST00000476151	RP11-577H5.5	ENSG00000267645	protein_coding	cds	chr7-102671552-102671601	0	2.81261e-84	-0.310125	0.003	0.075	5.81916e-79	closed
CB1 vs HB1	6 - NK + T	6a - CD4+ TN	chr22-18528382-18529603	ENST00000613577	TMEM191B	ENSG00000278558	protein_coding	cds	chr22-18529441-18529497	0	4.03858e-56	0.384238	0.233	0.073	8.35562e-51	open
CB1 vs HB1	6 - NK + T	6a - CD4+ TN	chr17-22520816-22522225	ENST00000540040	MTRNR2L1	ENSG00000256618	protein_coding	exon	chr17-22523111-22524663	885	2.89228e-45	0.242077	0.095	0.04	5.98399e-40	open
CB1 vs HB1	6 - NK + T	6a - CD4+ TN	chr1-628755-630979	ENST00000635509	RP5-857K21.4	ENSG00000230021	lincRNA	gap	chr1-601578-711710	0	4.5749e-38	0.205654	0.081	0.039	9.46525e-33	open
CB1 vs HB1	6 - NK + T	6a - CD4+ TN	chr12-52585667-52586683	ENST00000537672	KRT72	ENSG00000170486	protein_coding	cds	chr12-52585982-52586172	0	8.15993e-38	0.48761	0.251	0.041	1.68825e-32	open
CB1 vs HB1	6 - NK + T	6a - CD4+ TN	chr12-47426472-47427590	ENST00000552320	RP1-90J4.1	ENSG00000257906	lincRNA	exon	chr12-47419922-47420179	6292	1.19344e-36	-0.143634	0.006	0.03	2.46917e-31	closed
CB1 vs HB1	6 - NK + T	6a - CD4+ TN	chrX-56788538-56789453	ENST00000637096	LINC01420	ENSG00000204272	protein_coding	gap	chrX-56732200-56811019	0	4.94351e-34	-0.153618	0.007	0.031	1.02279e-28	closed
CB1 vs HB1	6 - NK + T	6a - CD4+ TN	chr17-81662736-81663751	ENST00000571224	PDE6G	ENSG00000185527	protein_coding	utr	chr17-81663059-81663112	0	6.48583e-31	0.400499	0.095	0.005	1.34189e-25	open
CB1 vs HB1	6 - NK + T	6a - CD4+ TN	chr8-8227498-8228922	ENST00000594215	RP11-556O5.6	ENSG00000268955	lincRNA	exon	chr8-8188535-8189195	38302	6.43273e-30	-0.160744	0.251	0.246	1.3309e-24	closed
CB1 vs HB1	6 - NK + T	6a - CD4+ TN	chr1-633516-634634	ENST00000635509	RP5-857K21.4	ENSG00000230021	lincRNA	gap	chr1-601578-711710	0	1.76568e-28	0.167392	0.085	0.047	3.6531e-23	open
[truncated: 510 more rows]

## Sheet: Full_DA_Peak_List_CB3_vs_HB3
comparison_group	major_cell_type	minor_cell_type	peak_name	tx_id	gene_name	gene_id	gene_biotype	type	closest_region	distance	p_val	avg_log2FC	pct.1	pct.2	p_val_adj	trend
[truncated: 1,321 more rows]

[truncated: 6 more sheets: CD14+_Mono_3Mths_vs_Birth, Enriched_GO_CD4_CD8_TN_DA_Peak, Enriched_GO_CD14+_Mono, Diff_Motif_List_CM_vs_HM, Diff_Motif_List_CB1_vs_HB1, Diff_Motif_List_CB3_vs_HB3]
