# Supplementary material for: Epigenetic imprinting of infant immunity by prenatal SARS-CoV-2
Source: Research Square preprint supplement (doi:10.21203/rs.3.rs-8150998/v1), 2025-12-12
Supplement: Supplementary file 2 [file b740e718d76cc6ef874cc16c.xlsx]

## Sheet: Summary
Table	Description
Enrolled_Mother_Infant_Dyads	Characteristics of enrolled mother-infant dyads
Infant_Vaccination_Schedule	The compulsory Singapore National Childhood Immunization Schedule
Summary_of_Multi-omics_Strategy	Summary of samples used in each experiment

## Sheet: Enrolled_Mother_Infant_Dyads
Study group		Dyads with antenatal COVID-19 (n=7)							Dyads with no antenatal COVID-19 (n=6)
Dyad ID		CS02	CS03	CS04	CS05	CS06	CS07	CS08	CT01	CT02	CT03	CT05	CT07	CT09
Characteristics of Enrolled Mothers	Maternal age (Years)	29	36	34	27	31	27	30	33	31	29	38	38	24
	Smoking history	No	No	Yes	No	No	No	No	No	No	No	No	No	No
	Comorbidities	No	No	Yes, chronic hepatitis C carrier	No	No	No	No	No	No	No	No	No	No
	Maternal ethnicity	Caucasian	Caucasian	Malay	Malay	Chinese	Indian	Malay	Malay	Chinese	Chinese	Chinese	Chinese	Chinese
	Parity (G, gravida; P, para)	G1P0	G1P0	G6P1	G1P0	G1P0	G3P1	G2P0	G2P0	G1P0	G3P1	G4P3	G2P1	G1P0
	Diagnosis of COVID-19 (Gestation, weeks)	32	29	24	22	10	28	4	/	/	/	/	/	/
	COVID severity (WHO classification)	Mild	Mild	Mild	Mild	Moderate	Asymptomatic	Mild	/	/	/	/	/	/
	Interval from COVID diagnosis to delivery (Days)	56	76	108	111	226	92	250	/	/	/	/	/	/
Peri-delivery Laboratory Results of Convalescent Mothers	COVID-19 nasopharyngeal swab (closest swab done prior to delivery)	Negative	Negative	Negative	Negative	Not done	Not done	Not done	/	/	/	/	/	/
	COVID-19 in serum	Negative	Negative	Negative	Negative	Negative	Negative	Negative	/	/	/	/	/	/
	COVID-19 in vaginal swab	Not done	Not done	Not done	Not done	Negative	Negative	Negative	/	/	/	/	/	/
	COVID-19 swab of umbilical cord	Negative	Negative	Negative	Negative	Negative	Negative	Negative	/	/	/	/	/	/
	COVID-19 swab of placenta	Negative	Negative	Negative	Negative	Negative	Negative	Negative	/	/	/	/	/	/
	COVID-19 swab of amniotic fluid	Not done	Not done	Not done	Negative	Negative	Negative	Not done	/	/	/	/	/	/
	COVID-19 swab of breast milk	Negative	Negative	Negative	Not done	Negative	Inconclusive	Not done	/	/	/	/	/	/
Characteristics of Infants	Mode of delivery	Vaginal	Vaginal	Vaginal	Vaginal	Vaginal	Vaginal	Vaginal	Vaginal	Vaginal	Caesarean Section	Vaginal	Vaginal	Vaginal
	Gestational Age (weeks + days)	40+0	39+4	39+4	38+0	41+3	39+0	40+1	38+4	38+2	40+3	40+5	40+5	40+2
	Sex	Female	Female	Female	Female	Male	Female	Female	Female	Male	Female	Male	Male	Female
	Birth weight (g)	3210	3895	3505	2695	3525	3645	3750	2935	3195	3280	4300	4300	3445
	Occipital frontal circumference (cm)	48	36	33.5	33	35	34	35	34	32	33.5	35.5	35.5	34
	Length at birth (cm)	34	52	51.5	47	52	50	51	52	51	49	54	54	51
	APGAR score at 1, 5 minutes of life respectively	9,9	9,9	9,9	9,9	9,9	9,9	9,9	9,9	9,9	9,9	9,9	9,9	9,9
	Mode of feeding	Exclusively breastfed	Exclusively breastfed	Mixed breast and formula feeding	Exclusively breastfed	Exclusively breastfed	Exclusively breastfed	Exclusively breastfed	Exclusively breastfed	Exclusively breastfed	Exclusively breastfed	Exclusively breastfed	Exclusively breastfed	Exclusively breastfed

## Sheet: Infant_Vaccination_Schedule
Vaccine	Birth	2Mths	4Mths	6Mths
Bacillus Calmette-Guerin (BCG)	D1
Hepatitis B (HepB)	D1	D2		D3
Diphtheria, tetanus and acellular pertussis (paediatric) (DTaP)		D1	D2	D3
Inactivated poliovirus (IPV)		D1	D2	D3
Haemophilus influenzae type b (Hib)
Pneumococcal conjugate (PCV10 or PCV13)		D1		D2

## Sheet: Summary_of_Multi-omics_Strategy
			26 single-cell datasets	30 data series	30 single-cell datasets	29 single-cell datasets	33 data series (11 samples × 3 conditions)	54 data series (9 samples × 6 conditions)
Subject/Time Point	Sample	Group	CyTOF analysis of PBMCs	Plasma cytokine/chemokine concentration measurement	scRNA-seq of PBMCs	scATAC-seq of PBMCs	T cell assay (FACS)	Cytokine/chemokine production after TLR-ligand stimulation
Mother	CS02-M	CM
	CS03-M		Yes	Yes	Yes	Yes
	CS04-M
	CS05-M			Yes	Yes
	CS06-M		Yes	Yes	Yes	Yes
	CS07-M		Yes	Yes	Yes	Yes
	CS08-M		Yes	Yes	Yes	Yes
	CT01-M	HM	Yes	Yes	Yes	Yes
	CT02-M		Yes	Yes	Yes	Yes
	CT03-M			Yes	Yes	Yes
	CT05-M		Yes	Yes	Yes	Yes
	CT07-M
	CT09-M		Yes	Yes	Yes	Yes
Infant (Birth)	CS02-B1	CB1
	CS03-B1		Yes	Yes	Yes	Yes
	CS04-B1
	CS05-B1		Yes	Yes	Yes	Yes
	CS06-B1		Yes	Yes	Yes	Yes
	CS07-B1		Yes	Yes	Yes	Yes
	CS08-B1		Yes	Yes	Yes	Yes
	CT01-B1	HB1	Yes	Yes	Yes	Yes
	CT02-B1		Yes	Yes	Yes	Yes
	CT03-B1			Yes	Yes	Yes
	CT05-B1		Yes	Yes	Yes	Yes
	CT07-B1
	CT09-B1		Yes	Yes	Yes	Yes
Infant (3Mths)	CS02-B3	CB3
	CS03-B3		Yes	Yes	Yes	Yes
	CS04-B3
	CS05-B3		Yes	Yes	Yes	Yes
	CS06-B3		Yes	Yes	Yes	Yes
	CS07-B3		Yes	Yes	Yes	Yes
	CS08-B3		Yes	Yes	Yes	Yes
	CT01-B3	HB3	Yes	Yes	Yes	Yes
	CT02-B3		Yes	Yes	Yes	Yes
	CT03-B3			Yes	Yes	Yes
	CT05-B3		Yes	Yes	Yes	Yes
	CT07-B3
	CT09-B3		Yes	Yes	Yes	Yes
Infant (6Mths)	CS02-B6	CB6					Yes	Yes
	CS03-B6						Yes	Yes
	CS04-B6						Yes	Yes
	CS05-B6						Yes	Yes
	CS06-B6						Yes	Yes
	CS07-B6
	CS08-B6
	CT01-B6	HB6					Yes
	CT02-B6						Yes	Yes
	CT03-B6						Yes
	CT05-B6						Yes	Yes
	CT07-B6						Yes	Yes
	CT09-B6						Yes	Yes
