# Supplementary material for: Epigenetic imprinting of infant immunity by prenatal SARS-CoV-2
Source: Research Square preprint supplement (doi:10.21203/rs.3.rs-8150998/v1), 2025-12-12
Supplement: Supplementary file 3 [file dc87bdc62740230c4a3cab49.xlsx]

## Sheet: Summary
Table	Description
CyTOF_Panel	Detailed information of antibodies used in CyTOF panel
CyTOF_Cell_Abundance	CyTOF cell abundance of immunotypes in maternal and infant PBMCs
Cytokine_Conc.	Plasma cytokine/chemokine concentrations measured by Luminex

## Sheet: CyTOF_Panel
Isotop Tag	Antibody	Clone	Company	Catalogue Number	Function
Y 89	CD45	HI30	Fluidigm	3089003B	-
Cd 112/114	CD14	TüK4	eBioscience	Q10064	-
Sn 115	CD57	HNK-1	Biolegend	359602	Maturation
	gdTCR-PE	5A6.E9	eBioscience	MHGD04	-
Pr 141	IgA	G18-1	BD Bioscience	555886	B
Nd 142	CD5	UCHT2	Biolegend	300602	Activated B
Nd 143	CD2	TS1/8	Biolegend	309212	Tmem, NK
Nd 144	HLA-DR	L243	Biolegend	307602	non-T
Nd 145	CD8	SK1	Biolegend	344702	-
Nd 146	CD19	HIB19	Biolegend	302202	B
Sm 147	CD3	UCHT1	Biolegend	300402	-
Nd 148	TCR Vd2	B6	Biolegend	331402	-
Sm 149	CD4	SK3	Biolegend	344602	-
Nd 150	CD45RA	HI100	Biolegend	304102	Naïve/TEMRA
Eu 151	CD64/FcγRI	10.1	Biolegend	305002	Mono
Sm 152	CD1c	L161	Biolegend	331502	non-T
Eu 153	CD27	LG.7F9	eBioscience	14-0271-82	Activation
Sm 154	CD127	A019D5	Biolegend	351302	Activation
Gd 155	ICOS	C398.4A	Biolegend	313502	Activation
Gd 156	CD23	EBVCS-5	Biolegend	338502	B, Myeloid
Gd 157	CD122/IL-2Rβ	TU27	Biolegend	339002	non-T
Gd 158	CD56	NCAM16.2	BD Bioscience	559043	NK
Tb 159	CD141	1A4	BD Bioscience	559780	Priming DCs
Gd 160	CD169	7-239	Biolegend	346002	Myeloid
Dy 161	CD24	ML5	Biolegend	311102	T/B
Dy 162	CD38	HIT2	Biolegend	303502	Activation
Dy 163	CD123	6H6	Biolegend	306002	Baso/pDC
Dy 164	Vd1_FITC	REA173	Miltenyi Biotec	130-100-532	-
Ho 165	Va7.2	3C10	Biolegend	351702	-
Er 166	CXCR5	RF8B2	BD Bioscience	552032	Homing Follicular T/B
Er 167	CD161	HP-3G10	Biolegend	339902	MAIT/ NK
Er 168	CCR2	K036C2	Biolegend	357202	Homing T
Tm 169	CD25	M-A251	Biolegend	356102	Activation
Er 170	CCR6	G034E3	Biolegend	353401	Homing/ Activation/ IL-17A+ gdT
Yb 171	CD45RO	UCHL1	Biolegend	304202	Memory T
Yb 172	CD193/CCR3	5E8	Biolegend	310702	T
Yb 173	CD13	WM15	Biolegend	301702	DC
Yb 174	CD86	IT2.2	BD Bioscience	555663	B, Myeloid/ APCs
Lu 175	CD11c	B-ly6	BD Bioscience	555390	DC
Yb 176	CD11b	ICRF44	Biolegend	301302	Mono/ NK/ Myeloid
Bi 209	CD16	3G8	Fluidigm	3209002B	-

## Sheet: CyTOF_Cell_Abundance
Sample	Dyad ID	Dyad Group	Subject/Time Point	Sample Group	CD4+ T (%)	CD4+CD45RA+ TN (%)	CD4+CD45RO+ TM (%)	CD4+ Treg (%)	CD8+ T (%)	CD8+CD45RA+ TN (%)	CD8+CD45RO+ TM (%)	CD8+ MAIT (%)	Total γδ T (%)	Vδ1 (%)	Vδ2 (%)	Vδ3 (%)	NKT (%)	Total NK (%)	CD16hi NK (%)	CD56hi NK (%)	Total B (%)	B cells (%)	Plasmablasts (%)	Total Mono (%)	CD14+ Mono (%)	Int Mono (%)	CD16+ Mono (%)	cDCs (%)	pDCs (%)	Basophils (%)
CS03-B1	CS03	COVID-19	Infant (Birth)	CB1	61.6	54.8	3.45	0.15	12.1	8.72	0.84	1.67	1.9	0.99	0.15	0.74	0.09	1.25	0.93	0.24	7.02	7.02	0	7.39	3.64	0.45	1.6	0.84	0.15	0.05
CS03-B3	CS03	COVID-19	Infant (3Mths)	CB3	68.2	61.9	3.95	0.59	13.6	12.6	0.5	0.02	2.76	0.79	0.61	1.35	0.06	3.32	2.66	0.56	9.09	8.93	0.13	0.33	0.19	0.01	0.05	0.05	0.06	0.03
CS03-M	CS03	COVID-19	Mother	CM	50.3	15.5	33.1	0.2	21.7	9.23	7.83	3.96	6.57	0.21	5.95	0.4	1.29	7.03	6.33	0.54	2.31	2.28	0.02	3.28	2.06	0.07	0.35	0.1	0.05	0.05
CS05-B1	CS05	COVID-19	Infant (Birth)	CB1	63.6	56.2	3.43	0.37	8.85	7.24	0.69	0.01	2.9	1.21	0.59	1.1	0.13	3.05	2.35	0.47	15.9	15.9	0.01	1.35	0.97	0	0.04	0.11	0.07	0.01
CS05-B3	CS05	COVID-19	Infant (3Mths)	CB3	66.2	59.4	3.29	0.46	8.42	6.35	0.7	0.04	4.15	1.05	0.2	2.9	0.32	3.22	2.51	0.54	8.57	8.57	0	3.2	1.59	0.35	1.06	0.11	0.04	0
CS06-B1	CS06	COVID-19	Infant (Birth)	CB1	25.2	9.19	15.3	0.05	17.5	8.74	6.97	0.54	2.63	0.4	1.9	0.33	8.03	24.4	22.6	0.77	11	10.8	0.15	1.4	0.2	0.02	0.88	0.21	0.25	0.45
CS06-B3	CS06	COVID-19	Infant (3Mths)	CB3	44.4	40.7	2.55	0.082	31.7	29	1.67	0	1.15	0.31	0.18	0.65	0.018	1.55	1.03	0.29	9.83	9.83	0	0.26	0.027	0	0.16	0.018	0.21	0.15
CS06-M	CS06	COVID-19	Mother	CM	31.6	25.5	3.84	0.00909	21	18.6	0.95	0.036	2.85	0.19	1.7	0.95	0.045	0.95	0.62	0.28	29.8	29.8	0.018	1.29	0.65	0.036	0.34	0.17	0.23	0.25
CS07-B1	CS07	COVID-19	Infant (Birth)	CB1	32.7	27.9	3.17	0.00909	10.4	7.43	2.06	0.018	2.15	0.63	0.55	0.96	0.00909	3.35	2.57	0.14	40.3	40.3	0	1.96	0.98	0.036	0.64	0.16	0.17	0.018
CS07-B3	CS07	COVID-19	Infant (3Mths)	CB3	18.5	5.24	12.4	0	18.4	11.8	5.03	0.52	0.67	0.17	0.24	0.27	0.49	8.45	7.23	0.77	35.3	35.3	0	2.33	1.4	0.045	0.35	0.23	0.24	0.2
CS07-M	CS07	COVID-19	Mother	CM	62.1	57	3.41	0.13	11.6	10	0.66	0.018	1.19	0.5	0.091	0.59	0.064	2.2	1.73	0.24	11.9	11.9	0	0.65	0.42	0	0.1	0.11	0.12	0.17
CS08-B1	CS08	COVID-19	Infant (Birth)	CB1	45.8	38.3	2.27	0.12	20.8	19.3	0.42	0	1.03	0.22	0.1	0.7	0.082	0.85	0.52	0.28	13.9	13.9	0	0.2	0.055	0.00909	0.091	0.036	0.15	0.25
CS08-B3	CS08	COVID-19	Infant (3Mths)	CB3	26.6	10.5	12.1	0.036	30.6	16	7.24	3.03	4.25	0.18	3.25	0.81	0.83	2.06	1.59	0.31	12.3	12.1	0.073	0.65	0.38	0.045	0.1	0.091	0.073	0.19
CS08-M	CS08	COVID-19	Mother	CM	50.9	45	2.6	0.13	18.3	17	0.35	0.018	1.51	0.22	0.65	0.65	0.055	1.93	1.37	0.45	12.7	12.6	0.073	0.14	0	0	0.064	0.036	0.082	0.13
CT01-B1	CT01	Healthy	Infant (Birth)	HB1	43.2	35.5	3.85	0.26	20	17.5	1.43	0.00909	2.01	0.97	0.091	0.94	0.12	1.33	0.75	0.34	18.9	18.9	0.045	3.28	1.46	0.43	1.15	0.12	0.42	0.17
CT01-B3	CT01	Healthy	Infant (3Mths)	HB3	53.8	47	4.71	0.027	25.3	21.9	1.8	0.018	1.28	0.54	0.073	0.66	0.036	1.4	1.01	0.25	7.68	7.68	0	0.49	0.064	0.00909	0.19	0.055	0.073	0.12
CT01-M	CT01	Healthy	Mother	HM	23.8	6.69	15.7	0.064	11.9	8.81	2.46	0.091	5.74	1.72	3.35	0.66	11.4	9.15	7.95	0.53	8.85	8.73	0.11	12	6.15	0.65	4.07	0.22	0.35	0.027
CT02-B1	CT02	Healthy	Infant (Birth)	HB1	27.8	14.1	12	0	18.8	14.1	2.56	0.58	21.2	0.055	20.5	0.62	0.8	13.6	12.4	0.86	8.79	8.65	0.036	0.2	0.018	0.00909	0.12	0.00909	0.064	0.082
CT02-B3	CT02	Healthy	Infant (3Mths)	HB3	51.5	47	3.12	0.72	24.4	22.8	1.11	0.045	5	1.01	2.37	1.57	0.13	2.51	1.96	0.45	10.1	9.97	0.17	2.61	1.99	0.045	0.33	0.17	0.34	0.064
CT02-M	CT02	Healthy	Mother	HM	27.1	21.9	3.85	0.00909	12.9	9.75	1.92	0.018	2.52	0.68	0.9	0.92	0	0.56	0.41	0.15	46.3	46.3	0	0.45	0.036	0.018	0.29	0.055	0.12	0.036
CT05-B1	CT05	Healthy	Infant (Birth)	HB1	27	16	9.31	0.018	25.1	21.7	2.15	0.045	4.21	0.11	0.49	3.61	0.12	8.12	5.02	1.75	8.59	8.58	0	2.8	0.31	0.073	1.85	0	0	0.027
CT05-B3	CT05	Healthy	Infant (3Mths)	HB3	29.2	21.8	3.55	0.018	18.7	16.8	0.99	0	1.74	0.35	0.036	1.35	0.00909	3.31	1.8	0.43	7.45	7.45	0.00909	13.2	10.6	0.14	0.96	0.59	1.43	0.036
CT05-M	CT05	Healthy	Mother	HM	39.7	34.5	3.86	0.091	14.8	13.7	0.62	0.036	1.33	0.22	0.59	0.52	0.018	2.81	2.28	0.42	33.1	33	0.027	0.44	0.036	0	0.25	0.055	0.082	0.036
CT09-B1	CT09	Healthy	Infant (Birth)	HB1	28.1	14.6	12.6	0.25	27.7	22.5	3.75	0.85	7.15	2.47	3.52	1.14	2.72	14.7	12.9	1.14	6.66	6.42	0.2	7.38	4.82	0.31	1.45	0.57	0.33	0.091
CT09-B3	CT09	Healthy	Infant (3Mths)	HB3	41.3	36	2.99	0.65	12.8	11	1.01	0.073	5.21	1.15	2.21	1.83	0.45	10.3	9	1.04	13	12.9	0.027	6.01	3.5	0.37	1.53	0.36	0.69	0.2
CT09-M	CT09	Healthy	Mother	HM	50.8	43.3	5.7	0.79	12.6	11.7	0.72	0.045	5.2	1.16	2.9	1.12	0.24	3.4	2.71	0.59	22	21.8	0.23	2.23	1.06	0.082	0.82	0.24	0.38	0.12

## Sheet: Cytokine_Conc.
Sample	Dyad ID	Dyad Group	Subject/Time Point	Group	EGF	FGF-2	Eotaxin	TGF-α	G-CSF	Flt-3L	GM-CSF	CX3CL1	IFN-α2	IFN-γ	GRO	IL-10	IL-12P40	MDC	IL-12P70	PDGF-AA	IL-13	PDGF-AB/BB	IL-15	sCD40L	IL-17A	IL-1RA	IL-1α	IL-9	IL-1β	IL-2	IL-4	IL-5	IL-6	IL-7	IL-8	IP-10	MCP-1	MIP-1α	MIP-1β	RANTES	TNF-α	VEGF
CS03-M	CS03	COVID-19	Mother	CM	21.09	79.73	43.93	0.96	43.31	39.04	1.79	119.91	18.8	6.53	157.24	10.86	12.64	301.8	7.51	149.61	1.52	249.55	4.85	111.66	3.99	44.52	3.97	1.48	1.61	0.87	41.76	1.34	11.22	5.63	7.33	117.39	133.74	1.53	6.52	1203.57	9.89	52.88
CS03-B1	CS03	COVID-19	Infant (Birth)	CB1	74.9322	105.549	288.77	3.7506	88.5514	79.7734	6.0914	330.904	56.392	13.1138	192.185	61.712	114.593	1435.26	13.2468	787.36	4.7348	518.567	8.5652	388.919	18.2476	144.864	10.1612	4.8678	2.66	2.527	69.7984	5.6658	28.8078	6.5436	20.8012	234.399	1659.55	13.9384	112.811	5557.43	44.289	132.016
CS03-B3	CS03	COVID-19	Infant (3Mths)	CB3	64.771	165.479	250.572	2.6068	125.552	54.131	5.3466	388.387	70.5432	13.1138	337.368	42.3472	74.5598	1940.02	17.7422	513.646	4.389	824.999	8.9642	237.112	20.9342	125.632	8.911	3.1654	3.1388	2.4206	235.889	0.7448	15.96	8.1396	17.6624	307.523	566.261	7.182	41.097	5188.62	39.9	132.016
CS05-M	CS05	COVID-19	Mother	CM	11.5482	67.716	42.2598	3.4086	64.638	34.1886	1.8012	86.583	24.168	8.3562	231.272	26.6532	14.6262	341.373	6.1674	221.365	1.5846	272.779	7.866	81.7722	5.4606	105.598	1.6416	1.2996	1.0944	0.9462	28.6368	9.0402	9.0858	15.96	10.089	303.115	145.988	3.8646	11.1834	1777.8	24.9546	41.7468
CS05-B1	CS05	COVID-19	Infant (Birth)	CB1	64.2124	83.0718	122.014	4.0964	39.1286	54.131	4.2028	209.129	117.758	7.448	317.072	41.4162	98.3136	1182.26	7.5278	708.438	1.9418	451.774	7.7672	402.857	15.5344	288.184	7.4746	3.0324	1.2502	2.0482	7.315	0	0	6.5436	20.2692	245.146	1073.68	11.4646	97.622	4225.76	31.2816	85.5722
CS05-B3	CS05	COVID-19	Infant (3Mths)	CB3	167.021	115.524	131.643	4.7082	54.4502	54.9556	4.9476	393.946	37.6922	7.9002	1998.67	40.033	50.6464	1979.89	9.842	3138.21	2.1014	8449.25	7.7672	1948.96	12.0498	112.624	5.0274	4.7082	2.66	2.7132	69.7984	0	4.2826	24.2326	15.1354	273.794	911.795	14.0714	120.817	5916.4	38.7296	140.661
CS06-M	CS06	COVID-19	Mother	CM	22.61	133.745	85.4126	1.596	66.1542	59.7436	5.3466	194.845	27.9832	8.778	212.108	10.6932	42.028	2287.55	14.3906	525.323	3.0058	929.51	9.3632	62.7228	14.6034	220.168	4.4422	1.9684	2.793	1.6492	39.4212	0	0	13.699	8.3524	270.655	626.35	3.8836	15.8802	1589.62	14.497	122.919
CS06-B1	CS06	COVID-19	Infant (Birth)	CB1	23.6	142.6	70.76	2.48	112.32	52.36	5.76	365.88	44	7.84	0	38.56	135.44	1377.04	13.08	69.6	2.92	57.64	8.72	27.28	24.72	288.04	6.96	2.52	1.88	2.88	11	0	14.32	12.24	40.76	299.36	2033.08	15.24	43.32	544	21.08	108.68
CS06-B3	CS06	COVID-19	Infant (3Mths)	CB3	23.94	165.479	66.7128	2.1812	88.5514	59.7436	4.5752	187.557	26.7064	12.6882	460.34	44.1826	73.6554	4479.84	12.6882	1511.62	3.3516	4129.89	8.1662	136.538	16.891	77.0868	2.8196	1.9684	2.8994	1.862	17.29	0.9044	0	14.9758	11.97	338.485	614.433	7.8736	116.082	5289.52	39.7936	113.263
CS07-M	CS07	COVID-19	Mother	CM	18.2476	165.479	67.8034	6.1712	165.612	87.5672	4.9476	256.477	36.5218	9.6558	662.819	41.4162	26.9724	482.657	10.9858	829.361	2.2876	1619.06	14.8428	75.677	14.6034	144.172	3.724	2.4206	4.2826	1.9684	45.5924	0	87.248	14.9758	17.6092	160.478	458.823	4.256	16.359	3682.16	21.546	108.182
CS07-B1	CS07	COVID-19	Infant (Birth)	CB1	25.1636	115.524	73.9746	2.66	109.964	67.9896	6.0914	342.688	42.294	5.2136	124.408	41.4162	88.7376	865.085	12.1296	376.789	2.2876	888.413	9.3632	96.6378	15.5344	263.074	7.8736	2.7132	2.66	3.2452	14.0182	1.5694	41.0172	6.5436	19.5244	205.538	1333.33	12.6882	44.3156	3272.15	29.8718	85.5722
CS07-B3	CS07	COVID-19	Infant (3Mths)	CB3	21.945	105.549	69.1068	1.995	42.2674	34.8194	4.0166	342.688	37.6922	12.236	60.515	40.4852	95.7334	1185.27	10.9858	224.77	2.2876	995.718	6.9692	63.7602	15.0822	83.125	6.8628	2.5802	1.2502	2.2078	14.0182	0	0	8.1396	8.8844	894.984	539.741	7.98	18.2476	1610.74	35.378	85.5722
CS08-M	CS08	COVID-19	Mother	CM	20.9076	150.237	46.7096	1.9418	63.2548	48.1992	4.2028	269.405	31.7338	7.9002	89.8814	23.7804	16.1728	256.238	16.625	140.82	5.054	377.933	9.3632	38.6764	13.6724	121.296	4.6284	2.261	1.9684	2.1546	26.9192	0	7.3948	8.1396	5.7988	228.733	482.63	6.8894	11.6242	2263.29	17.9284	129.808
CS08-B1	CS08	COVID-19	Infant (Birth)	CB1	36.974	83.0718	174.336	4.389	29.4462	46.417	3.8304	236.607	32.9574	5.2136	260.068	41.4162	84.8008	1145.18	7.5278	1303.19	4.2028	1916.24	6.5968	419.376	16.891	263.074	6.4638	2.793	1.3832	2.4206	17.29	2.7398	3.4314	6.5436	14.4704	232.511	1634.06	14.3374	185.482	5271.19	28.462	140.661
CS08-B3	CS08	COVID-19	Infant (3Mths)	CB3	24.5518	133.745	107.677	4.2028	54.4502	56.5782	5.3466	256.477	64.5848	8.778	190.217	54.3438	68.7078	1253.45	16.0664	462.175	5.054	445.231	8.9642	55.2748	14.8428	60.249	12.635	3.4846	2.793	2.527	111.082	1.0906	32.9042	11.7306	17.423	163.457	671.703	7.9534	65.303	4921.05	36.4154	132.016
CT01-M	CT01	Healthy	Mother	HM	7.99	88.54	69.62	1.12	73.57	43.87	2.01	83.85	8.06	25.59	135.72	19.39	10.92	338.27	8.76	9.72	4.35	93.93	9.09	22.78	9.35	46.69	4.13	0.71	2.44	1.61	30.72	2.41	4.34	16.58	12.81	119.8	224.9	2.03	7.26	1016.55	13.95	57.47
CT01-B1	CT01	Healthy	Infant (Birth)	HB1	52.6946	105.549	90.307	3.8038	66.1542	71.5806	4.5752	306.858	36.5218	8.778	576.209	36.7878	110.762	832.899	8.6982	1551.79	3.3516	613.955	8.1662	439.219	14.1512	365.431	9.3366	2.5802	1.9684	1.596	20.5352	0	9.5228	11.039	36.8676	115.657	1105.18	18.0348	94.6428	7541.42	33.6224	113.263
CT01-B3	CT01	Healthy	Infant (3Mths)	HB3	45.6722	165.479	120.365	4.9476	99.3776	52.4818	7.6076	399.505	52.1626	13.965	896.819	64.0262	114.167	2631.64	25.5094	2697.96	9.8154	6004.07	10.1346	605.496	16.4388	116.987	22.8494	9.5494	3.8304	1.9684	165.665	2.4472	63.7868	33.4096	24.6316	784.062	674.097	11.3848	93.8182	9228.66	56.6314	197.212
CT02-M	CT02	Healthy	Mother	HM	9.46	62.21	43.93	1.29	43.31	37.5	2.29	59.13	7.01	3.3	276.53	12.96	19.75	608.87	10.83	159.08	1.33	405.63	8.66	64.11	3.17	43.43	1.63	0.97	1.35	0.66	14.82	0.47	4.83	4.66	8.07	121.71	117.53	2.96	8.35	2196.64	7.65	34.45
CT02-B1	CT02	Healthy	Infant (Birth)	HB1	71.0486	129.356	131.803	4.655	63.2548	66.5532	4.9476	300.74	36.5218	16.5186	663.377	48.811	80.8108	1625.92	15.5078	2384.5	2.2876	3257.2	10.5336	1039.24	15.5344	307.842	79.6404	3.0324	3.1388	3.5112	39.4212	2.3142	5.9052	12.3956	33.649	253.445	1574.85	25.1104	152.524	7992.45	35.9632	171.676
CT02-B3	CT02	Healthy	Infant (3Mths)	HB3	34.2076	158.004	95.4674	3.1122	66.1542	96.7974	5.719	294.568	34.1544	11.3848	209.315	49.2632	100.043	3485.88	13.2468	440.922	3.3516	443.608	10.1346	113.555	13.6724	86.1042	6.251	3.4846	3.1388	1.995	39.4212	0.5586	2.5004	12.3956	12.6882	530.75	773.422	10.6134	84.455	5297.79	42.1078	132.016
CT03-M	CT03	Healthy	Mother	HM	14.1474	70.9194	52.5996	1.425	32.0112	46.2156	1.9608	73.9974	18.126	5.985	211.766	17.7498	5.9508	247.585	6.1674	117.169	1.4364	598.637	8.1966	68.8674	5.5632	93.195	1.6416	1.1058	1.14	0.5358	53.8194	12.198	10.0434	6.954	12.8478	243.732	219.108	2.5536	13.0986	1551.1	6.27	39.273
CT03-B1	CT03	Healthy	Infant (Birth)	HB1	65.6222	94.829	104.91	2.7398	29.4462	25.6956	4.2028	243.31	20.0564	4.3358	424.509	29.8186	65.0636	821.195	7.5278	850.482	2.2876	1626.75	6.1978	474.704	13.9118	172.208	4.0166	1.6758	1.4896	2.1014	23.7272	0	1.463	4.8412	17.1038	196.095	1054.13	12.6882	112.013	3801.43	31.9732	79.1616
CT03-B3	CT03	Healthy	Infant (3Mths)	HB3	17.423	89.0834	10.7464	1.4098	45.3796	30.457	2.7132	229.851	36.5218	9.6558	180.268	17.2634	12.1296	449.593	5.187	84.721	2.66	253.232	6.5968	19.4446	14.6034	179.124	5.453	2.261	1.2502	1.995	14.0182	0	0	4.8412	4.0432	934.671	394.824	6.4904	23.5942	2010.59	18.886	64.8508
CT05-M	CT05	Healthy	Mother	HM	23.5676	71.0885	67.1118	15.2152	53.6655	30.6432	2.8595	114.925	18.2609	3.9501	492.339	20.7081	9.7489	312.949	6.0648	341.93	1.1438	1988.38	4.4821	137.682	5.6658	237.086	1.9684	0.6783	1.7955	0.8512	25.8552	0.0665	6.1047	6.1978	13.2601	159.972	529.859	3.458	14.0581	2726.9	9.576	59.0919
CT05-B1	CT05	Healthy	Infant (Birth)	HB1	50.8326	89.0834	231.553	23.9666	93.9778	78.4434	7.2352	371.496	149.04	8.778	1660.35	85.6254	62.776	974.438	14.3906	758.845	3.1654	665.399	7.7672	291.323	15.9866	2181.94	6.5702	2.9526	3.1388	2.4738	51.7104	0.133	72.6446	20.9076	64.4518	462.574	5893.26	22.477	109.22	8416.72	36.7612	156.78
CT05-B3	CT05	Healthy	Infant (3Mths)	HB3	24.64	100.56	61.08	1.88	64.52	57.98	4.16	239.82	53.04	7.26	522.08	45.72	22.6	2757.52	10.82	1678.02	3.04	3288.54	7.92	106.46	9.94	70.34	3.94	2.9	1.82	1.82	76.94	3.28	0	13.56	13.5	189.68	886.1	8.24	50.14	4561.78	40.18	131.78
CT09-M	CT09	Healthy	Mother	HM	21.2534	150.237	78.869	1.596	35.9632	49.9282	4.7614	588.897	26.7064	9.6558	150.503	25.6424	36.1228	324.999	12.1296	212.747	7.714	316.7	7.7672	39.7936	13.9118	61.7918	7.4746	3.4846	3.591	2.1014	196.734	3.4314	28.0098	18.62	7.2884	365.378	260.733	2.1546	7.0756	2567.67	11.039	102.915
CT09-B1	CT09	Healthy	Infant (Birth)	HB1	36.974	94.829	81.7152	1.9418	42.2674	78.4434	3.458	282.093	38.8626	7.9002	349.285	31.2284	91.371	863.835	8.6982	1683.81	1.9418	2450.05	6.783	312.763	15.5344	67.963	6.0382	2.5802	1.0108	2.1014	14.0182	0	0	13.699	9.8154	169.309	1072.99	3.3516	24.3656	14465.4	28.462	85.5722
CT09-B3	CT09	Healthy	Infant (3Mths)	HB3	29.7122	115.524	81.0236	1.8354	48.4386	65.8084	4.9476	282.093	21.4396	5.2136	295.313	37.7188	103.501	2260.63	10.9858	1063.28	2.66	2103.47	6.9692	128.638	13.2202	67.963	4.4422	2.128	1.8354	1.862	33.1968	0	0	9.6292	17.024	271.107	815.689	7.0224	33.5692	6300.95	40.0064	85.5722
