# Supplementary material for: Epigenetic imprinting of infant immunity by prenatal SARS-CoV-2
Source: Research Square preprint supplement (doi:10.21203/rs.3.rs-8150998/v1), 2025-12-12
Supplement: Supplementary file 4 [file f2cfe5b8d4e4e7f704fa9174.xlsx]

## Sheet: Summary
Table	Description
scRNA-seq_Sample_Information	Sample information and analysis outcome of scRNA-seq datasets
Full_DEG_List_CM_vs_HM	Full list of DEGs between CM vs HM
Full_DEG_List_CB1_vs_HB1	Full list of DEGs between CB1 vs HB1
Full_DEG_List_CB3_vs_HB3	Full list of DEGs between CB3 vs HB3
CD14+_Mono_3Mths_vs_Birth	List of DEGs between infants at 3Mths vs Birth in CD14+ monocytes
γδ_T_DEGs_CD8+_vs_CD8-	List of DEGs between CD8+ vs CD8- cell states of infant γδ T cells
Enriched_GO_6_Cell_Type_DEGs	GO enrichment results of DEGs in 6 major cell types, including erythroid cells, MKs, HSPCs, B cells, pDCs with cDC2, and MPAs
Enriched_GO_CD4+_TN_DEGs	GO enrichment results of DEGs in CD4+ TN, separated into up- and down-regulated genes in CB1 vs HB1, and CB3 vs HB3, respectively
Enriched_GO_CD8+_TN_DEGs	GO enrichment results of DEGs in CD8+ TN, separated into up- and down-regulated genes in CB1 vs HB1, and CB3 vs HB3, respectively
Enriched_GO_CD16hi_NK_DEGs	GO enrichment results of DEGs in CD16hi NK, separated into up- and down-regulated genes in CB1 vs HB1, and CB3 vs HB3, respectively
Enriched_GO_CD14+_Mono_DEGs	GO enrichment results of DEGs in CD14+ monocytes, separated into up- and down-regulated genes in CB1 vs HB1, and CB3 vs HB3, respectively
Enriched_GO_CD8+_vs_CD8-_γδ_T	GO enrichment results of DEGs between CD8+ vs CD8- cell states of infant γδ T cells

## Sheet: scRNA-seq_Sample_Information
Sample	Dyad ID	Dyad Group	Subject/Time Point	Group	# Reads	# Cells	# Cells Post Filtering	# Cells Annotated	1 - Erythorid	2 - MKs	3 - HSPCs	4 - Mono	5 - B cells	6 - NK + T	7 - pDCs + cDC2	8 - MPAs
CS03-M	CS03	COVID-19	Mother	CM	237403166	4012	3424	3416	0	0	0	156	85	3172	1	2
CS05-M	CS05	COVID-19	Mother	CM	92353024	216	173	/	/	/	/	/	/	/	/	/
CS06-M	CS06	COVID-19	Mother	CM	268468335	8008	7064	6820	1	111	2	911	569	5151	8	67
CS07-M	CS07	COVID-19	Mother	CM	340903982	6642	5696	5637	10	8	5	1735	1308	2381	5	185
CS08-M	CS08	COVID-19	Mother	CM	252184949	1798	1539	1529	1	7	0	333	207	925	0	56
CT01-M	CT01	Control	Mother	HM	294003491	3768	3219	3174	0	28	2	1372	85	1643	2	42
CT02-M	CT02	Control	Mother	HM	278007759	4466	3815	/	/	/	/	/	/	/	/	/
CT03-M	CT03	Control	Mother	HM	256670500	1281	834	832	1	5	1	32	28	765	0	0
CT05-M	CT05	Control	Mother	HM	248759136	3838	3197	3161	0	6	0	698	353	2091	2	11
CT09-M	CT09	Control	Mother	HM	323873506	4360	3641	3620	0	23	1	770	272	2521	0	33
CS03-B1	CS03	COVID-19	Infant (Birth)	CB1	213296507	4104	3552	3542	27	2	0	233	188	3072	12	8
CS05-B1	CS05	COVID-19	Infant (Birth)	CB1	259595264	2072	1713	1708	6	4	2	525	187	968	0	16
CS06-B1	CS06	COVID-19	Infant (Birth)	CB1	313632101	8709	6400	6362	1041	78	10	230	662	4324	9	8
CS07-B1	CS07	COVID-19	Infant (Birth)	CB1	327831654	8041	6293	6107	421	66	3	1001	700	3822	2	92
CS08-B1	CS08	COVID-19	Infant (Birth)	CB1	293113612	5457	4604	4571	53	8	3	1451	658	2252	0	146
CT01-B1	CT01	Control	Infant (Birth)	HB1	279614840	4157	3489	3471	27	16	7	725	762	1907	0	27
CT02-B1	CT02	Control	Infant (Birth)	HB1	307487335	4966	4256	4240	23	14	4	361	356	3468	4	10
CT03-B1	CT03	Control	Infant (Birth)	HB1	226819982	804	630	628	5	6	2	201	26	385	2	1
CT05-B1	CT05	Control	Infant (Birth)	HB1	248335443	3583	3012	2899	133	65	36	1429	112	1034	27	63
CT09-B1	CT09	Control	Infant (Birth)	HB1	343772282	3997	3278	3259	4	29	11	634	561	1979	0	41
CS03-B3	CS03	COVID-19	Infant (3Mths)	CB3	277575151	2868	2470	2446	0	11	0	187	283	1955	1	9
CS05-B3	CS05	COVID-19	Infant (3Mths)	CB3	352780920	3841	3213	3210	2	0	0	77	383	2746	2	0
CS06-B3	CS06	COVID-19	Infant (3Mths)	CB3	304245690	7182	6354	6249	3	96	1	215	2135	3763	26	10
CS07-B3	CS07	COVID-19	Infant (3Mths)	CB3	286776959	7521	6445	6322	1	47	0	51	2737	3476	8	2
CS08-B3	CS08	COVID-19	Infant (3Mths)	CB3	233556472	1171	1045	1043	1	4	1	26	178	830	0	3
CT01-B3	CT01	Control	Infant (3Mths)	HB3	338968878	10421	9183	9098	1	23	1	542	4051	4457	4	19
CT02-B3	CT02	Control	Infant (3Mths)	HB3	412860427	5404	4505	4469	0	23	0	371	999	3051	2	23
CT03-B3	CT03	Control	Infant (3Mths)	HB3	232549314	2648	2277	2268	0	6	2	409	422	1412	0	17
CT05-B3	CT05	Control	Infant (3Mths)	HB3	300036605	8727	7617	7524	0	26	1	251	2690	4515	0	41
CT09-B3	CT09	Control	Infant (3Mths)	HB3	289222452	4247	3696	3664	0	25	0	153	1165	2281	18	22
Total					8434699736	138309	116634	111269	1761	737	95	15079	22162	70346	135	954
Average					2.81157e+08	4610.3	3887.8	3973.89	62.8929	26.3214	3.39286	538.536	791.5	2512.36	4.82143	34.0714

## Sheet: Full_DEG_List_CM_vs_HM
comparison_group	major_cell_type	minor_cell_type	gene_name	p_val	avg_log2FC	pct.1	pct.2	p_val_adj	trend
CM vs HM	2 - MKs	/	FTH1	1.25869e-22	2.69395	1	0.565	2.72858e-18	up
CM vs HM	2 - MKs	/	ITM2B	3.48389e-15	2.16744	0.873	0.323	7.55237e-11	up
CM vs HM	2 - MKs	/	TPM1	3.54435e-13	2.22272	0.77	0.21	7.68344e-09	up
CM vs HM	2 - MKs	/	ACTN1	1.934e-12	1.96808	0.802	0.306	4.19253e-08	up
CM vs HM	2 - MKs	/	KIF2A	2.05716e-12	1.38384	0.873	0.484	4.4595e-08	up
CM vs HM	2 - MKs	/	CCND3	1.53113e-10	2.00572	0.778	0.339	3.31918e-06	up
CM vs HM	2 - MKs	/	HLA-B	3.20648e-10	-1.13089	0.833	0.952	6.95101e-06	down
CM vs HM	2 - MKs	/	PFN1	4.50554e-10	1.40439	0.778	0.323	9.76711e-06	up
CM vs HM	2 - MKs	/	TPM4	1.21008e-09	1.43911	0.881	0.597	2.62321e-05	up
CM vs HM	2 - MKs	/	CALM1	5.71108e-09	1.38429	0.833	0.5	0.000123805	up
CM vs HM	2 - MKs	/	ESAM	1.33301e-08	1.93611	0.667	0.226	0.000288969	up
CM vs HM	2 - MKs	/	FNTB	1.6831e-08	-2.04093	0.008	0.258	0.000364863	down
CM vs HM	2 - MKs	/	ATP6V0C	2.93306e-08	2.14552	0.5	0.097	0.00063583	up
CM vs HM	2 - MKs	/	SPARC	3.11138e-07	-0.76815	0.937	0.935	0.00674484	down
CM vs HM	2 - MKs	/	CLDN5	3.74138e-07	2.01962	0.484	0.097	0.00811057	up
CM vs HM	2 - MKs	/	NRGN	3.9692e-07	0.876746	0.952	0.839	0.00860442	up
CM vs HM	2 - MKs	/	MT-ND1	5.77972e-07	-1.31272	0.532	0.758	0.0125293	down
CM vs HM	2 - MKs	/	PLA2G12A	6.18523e-07	1.43479	0.643	0.274	0.0134083	up
CM vs HM	2 - MKs	/	DAD1	9.16173e-07	1.66543	0.54	0.177	0.0198608	up
CM vs HM	2 - MKs	/	NDFIP1	1.05616e-06	2.37533	0.333	0.016	0.0228955	up
CM vs HM	2 - MKs	/	AC127502.2	1.57671e-06	-1.37733	0.222	0.548	0.03418	down
CM vs HM	4 - Mono	4a - CD14+ Mono	SERP1	0	1.53786	0.879	0.362	0	up
CM vs HM	4 - Mono	4a - CD14+ Mono	VIM	0	1.09946	0.992	0.981	0	up
CM vs HM	4 - Mono	4a - CD14+ Mono	FTH1	0	2.03019	0.998	0.977	0	up
CM vs HM	4 - Mono	4a - CD14+ Mono	PFN1	0	1.63148	0.96	0.718	0	up
CM vs HM	4 - Mono	4a - CD14+ Mono	CFD	0	1.55558	0.767	0.202	0	up
CM vs HM	4 - Mono	4a - CD14+ Mono	TRAPPC5	0	1.54459	0.787	0.15	0	up
CM vs HM	4 - Mono	4a - CD14+ Mono	CST3	0	1.20315	0.964	0.775	0	up
CM vs HM	4 - Mono	4a - CD14+ Mono	MT-CO2	0	-1.03503	0.995	0.999	0	down
CM vs HM	4 - Mono	4a - CD14+ Mono	MT-CO3	0	-0.921974	0.994	0.997	0	down
CM vs HM	4 - Mono	4a - CD14+ Mono	MT-ND3	0	-1.14276	0.946	0.988	0	down
CM vs HM	4 - Mono	4a - CD14+ Mono	MT-ND4L	0	-1.47274	0.862	0.963	0	down
CM vs HM	4 - Mono	4a - CD14+ Mono	MT-CO1	5.31538e-300	-0.810134	0.998	0.998	1.15227e-295	down
CM vs HM	4 - Mono	4a - CD14+ Mono	CD74	1.42974e-264	-1.13312	0.972	0.996	3.0994e-260	down
CM vs HM	4 - Mono	4a - CD14+ Mono	MT-CYB	7.11753e-263	-0.969102	0.977	0.996	1.54294e-258	down
CM vs HM	4 - Mono	4a - CD14+ Mono	PGLS	2.27377e-259	1.25544	0.771	0.277	4.92908e-255	up
CM vs HM	4 - Mono	4a - CD14+ Mono	COX5A	1.0252e-255	1.20893	0.69	0.176	2.22242e-251	up
CM vs HM	4 - Mono	4a - CD14+ Mono	RPL13	2.35277e-240	0.876619	0.982	0.899	5.10034e-236	up
CM vs HM	4 - Mono	4a - CD14+ Mono	MT-ATP6	8.10715e-235	-0.749432	0.977	0.992	1.75747e-230	down
CM vs HM	4 - Mono	4a - CD14+ Mono	MT-ND1	4.48683e-228	-0.706838	0.982	0.996	9.72654e-224	down
CM vs HM	4 - Mono	4a - CD14+ Mono	MT-ATP8	9.88004e-227	-1.14419	0.74	0.901	2.14179e-222	down
CM vs HM	4 - Mono	4a - CD14+ Mono	MT-ND5	8.79946e-205	-0.897148	0.888	0.964	1.90755e-200	down
CM vs HM	4 - Mono	4a - CD14+ Mono	DUSP6	1.26522e-202	1.19923	0.838	0.524	2.74275e-198	up
CM vs HM	4 - Mono	4a - CD14+ Mono	KLF6	1.26906e-202	0.991124	0.929	0.763	2.75108e-198	up
CM vs HM	4 - Mono	4a - CD14+ Mono	MRPL41	4.58843e-191	0.939492	0.51	0.089	9.94681e-187	up
CM vs HM	4 - Mono	4a - CD14+ Mono	IER2	3.84702e-190	0.982837	0.909	0.644	8.33956e-186	up
CM vs HM	4 - Mono	4a - CD14+ Mono	CYBA	1.15506e-182	0.917278	0.79	0.369	2.50393e-178	up
CM vs HM	4 - Mono	4a - CD14+ Mono	SPI1	1.49632e-171	0.946537	0.736	0.338	3.24373e-167	up
CM vs HM	4 - Mono	4a - CD14+ Mono	ACAP2	1.6158e-171	0.982131	0.723	0.335	3.50273e-167	up
CM vs HM	4 - Mono	4a - CD14+ Mono	JUNB	1.71065e-162	0.732151	0.938	0.804	3.70835e-158	up
CM vs HM	4 - Mono	4a - CD14+ Mono	CALM1	6.63322e-161	0.87125	0.855	0.604	1.43795e-156	up
CM vs HM	4 - Mono	4a - CD14+ Mono	ITM2B	2.53746e-160	0.926439	0.869	0.621	5.5007e-156	up
CM vs HM	4 - Mono	4a - CD14+ Mono	HLA-DPA1	1.40406e-159	-1.25442	0.505	0.777	3.04373e-155	down
CM vs HM	4 - Mono	4a - CD14+ Mono	REX1BD	1.0592e-156	0.864949	0.552	0.155	2.29613e-152	up
CM vs HM	4 - Mono	4a - CD14+ Mono	NCF1	8.49002e-153	1.01778	0.844	0.546	1.84047e-148	up
CM vs HM	4 - Mono	4a - CD14+ Mono	RPL15	1.73274e-152	-0.524752	0.972	0.99	3.75623e-148	down
CM vs HM	4 - Mono	4a - CD14+ Mono	KLF2	4.05014e-150	1.01006	0.546	0.17	8.7799e-146	up
CM vs HM	4 - Mono	4a - CD14+ Mono	EEF1A1	2.1686e-147	-0.497139	0.994	0.999	4.70109e-143	down
CM vs HM	4 - Mono	4a - CD14+ Mono	YWHAB	6.26304e-145	0.686185	0.905	0.775	1.3577e-140	up
CM vs HM	4 - Mono	4a - CD14+ Mono	ATP6V0C	2.51581e-143	0.739405	0.886	0.693	5.45377e-139	up
CM vs HM	4 - Mono	4a - CD14+ Mono	GUK1	2.9694e-143	0.849007	0.659	0.277	6.43707e-139	up
CM vs HM	4 - Mono	4a - CD14+ Mono	HLA-DPB1	2.70325e-140	-1.23462	0.457	0.724	5.8601e-136	down
CM vs HM	4 - Mono	4a - CD14+ Mono	MTDH	1.81952e-138	0.839355	0.728	0.373	3.94436e-134	up
CM vs HM	4 - Mono	4a - CD14+ Mono	MNDA	1.4161e-136	0.660403	0.944	0.894	3.06983e-132	up
CM vs HM	4 - Mono	4a - CD14+ Mono	LYZ	3.18526e-135	-0.514681	0.997	0.998	6.90501e-131	down
CM vs HM	4 - Mono	4a - CD14+ Mono	RETN	6.43929e-134	1.24656	0.634	0.297	1.39591e-129	up
CM vs HM	4 - Mono	4a - CD14+ Mono	ARL6IP4	8.0844e-133	0.803728	0.705	0.341	1.75254e-128	up
CM vs HM	4 - Mono	4a - CD14+ Mono	JTB	2.07147e-131	0.789715	0.595	0.225	4.49054e-127	up
CM vs HM	4 - Mono	4a - CD14+ Mono	CDC42EP3	2.92691e-129	0.944083	0.684	0.347	6.34494e-125	up
CM vs HM	4 - Mono	4a - CD14+ Mono	RPL14	1.92796e-128	-0.462041	0.971	0.994	4.17943e-124	down
CM vs HM	4 - Mono	4a - CD14+ Mono	UQCRFS1	3.4779e-128	0.772743	0.547	0.194	7.5394e-124	up
CM vs HM	4 - Mono	4a - CD14+ Mono	PAK2	1.09772e-127	0.831415	0.689	0.349	2.37963e-123	up
CM vs HM	4 - Mono	4a - CD14+ Mono	HLA-DRA	5.26634e-125	-0.902924	0.798	0.923	1.14164e-120	down
CM vs HM	4 - Mono	4a - CD14+ Mono	RPS15A	5.7607e-122	-0.340213	0.993	0.997	1.2488e-117	down
CM vs HM	4 - Mono	4a - CD14+ Mono	UBE2D2	2.20505e-120	0.75372	0.56	0.215	4.78011e-116	up
CM vs HM	4 - Mono	4a - CD14+ Mono	S100A8	2.39721e-120	0.787282	0.999	0.995	5.19668e-116	up
CM vs HM	4 - Mono	4a - CD14+ Mono	MRPS34	3.46474e-120	0.733899	0.469	0.136	7.51086e-116	up
CM vs HM	4 - Mono	4a - CD14+ Mono	RPL4	4.20911e-120	-0.611615	0.896	0.941	9.12451e-116	down
CM vs HM	4 - Mono	4a - CD14+ Mono	RPL22	5.58637e-119	-0.455178	0.966	0.989	1.21101e-114	down
CM vs HM	4 - Mono	4a - CD14+ Mono	MT-ND2	1.8955e-117	-0.522631	0.967	0.989	4.10906e-113	down
CM vs HM	4 - Mono	4a - CD14+ Mono	PRELID1	3.09475e-117	0.672393	0.623	0.256	6.7088e-113	up
CM vs HM	4 - Mono	4a - CD14+ Mono	TPM4	7.83777e-117	0.810109	0.611	0.276	1.69907e-112	up
CM vs HM	4 - Mono	4a - CD14+ Mono	NACA	9.38726e-117	-0.430185	0.978	0.993	2.03497e-112	down
CM vs HM	4 - Mono	4a - CD14+ Mono	S100A10	3.05884e-116	0.555815	0.973	0.959	6.63094e-112	up
CM vs HM	4 - Mono	4a - CD14+ Mono	ZFP36	3.44013e-116	0.727456	0.948	0.896	7.45752e-112	up
CM vs HM	4 - Mono	4a - CD14+ Mono	RNASET2	6.95799e-116	0.76613	0.738	0.425	1.50835e-111	up
CM vs HM	4 - Mono	4a - CD14+ Mono	CLTA	5.67291e-114	0.733989	0.673	0.338	1.22977e-109	up
CM vs HM	4 - Mono	4a - CD14+ Mono	UBE2D1	8.48686e-113	0.808415	0.527	0.201	1.83978e-108	up
CM vs HM	4 - Mono	4a - CD14+ Mono	RPL28	1.76821e-112	-0.270782	0.996	0.999	3.83313e-108	down
CM vs HM	4 - Mono	4a - CD14+ Mono	GRB2	2.76751e-111	0.705692	0.817	0.555	5.99941e-107	up
CM vs HM	4 - Mono	4a - CD14+ Mono	JUND	8.17465e-110	0.792763	0.591	0.256	1.7721e-105	up
CM vs HM	4 - Mono	4a - CD14+ Mono	ANP32B	2.41656e-107	0.738263	0.629	0.308	5.23861e-103	up
CM vs HM	4 - Mono	4a - CD14+ Mono	S100A9	1.20848e-105	0.692318	0.999	0.998	2.61974e-101	up
CM vs HM	4 - Mono	4a - CD14+ Mono	RPL29	1.21923e-105	-0.348952	0.984	0.996	2.64305e-101	down
CM vs HM	4 - Mono	4a - CD14+ Mono	RPL21	2.86744e-105	0.470162	0.96	0.922	6.21603e-101	up
CM vs HM	4 - Mono	4a - CD14+ Mono	TSPO	3.34732e-105	0.565579	0.971	0.896	7.25631e-101	up
CM vs HM	4 - Mono	4a - CD14+ Mono	CD37	5.78941e-104	-0.631005	0.887	0.952	1.25503e-99	down
CM vs HM	4 - Mono	4a - CD14+ Mono	RNF130	1.50662e-103	0.719492	0.7	0.403	3.26605e-99	up
CM vs HM	4 - Mono	4a - CD14+ Mono	RPL11	3.29855e-103	-0.321729	0.995	0.999	7.1506e-99	down
CM vs HM	4 - Mono	4a - CD14+ Mono	RPL18A	8.17899e-102	-0.339472	0.992	0.997	1.77304e-97	down
CM vs HM	4 - Mono	4a - CD14+ Mono	AKIRIN2	3.5501e-101	0.727275	0.5	0.194	7.69591e-97	up
CM vs HM	4 - Mono	4a - CD14+ Mono	RPL9	2.39691e-99	-0.457826	0.948	0.976	5.19601e-95	down
CM vs HM	4 - Mono	4a - CD14+ Mono	MAP1LC3B	2.36872e-97	0.638392	0.54	0.218	5.1349e-93	up
CM vs HM	4 - Mono	4a - CD14+ Mono	JUN	3.11926e-97	0.92002	0.782	0.534	6.76192e-93	up
CM vs HM	4 - Mono	4a - CD14+ Mono	RPS14	8.18336e-97	-0.271097	0.995	0.999	1.77399e-92	down
CM vs HM	4 - Mono	4a - CD14+ Mono	RPS3	7.69869e-96	-0.346287	0.989	0.995	1.66892e-91	down
CM vs HM	4 - Mono	4a - CD14+ Mono	ARPC5	8.88649e-96	0.583679	0.903	0.786	1.92641e-91	up
CM vs HM	4 - Mono	4a - CD14+ Mono	AHR	9.62805e-96	0.77645	0.46	0.168	2.08717e-91	up
CM vs HM	4 - Mono	4a - CD14+ Mono	MPG	1.74988e-94	0.601067	0.358	0.093	3.79339e-90	up
CM vs HM	4 - Mono	4a - CD14+ Mono	LGALS2	5.56597e-94	0.791166	0.72	0.44	1.20659e-89	up
CM vs HM	4 - Mono	4a - CD14+ Mono	RPL7A	1.00882e-93	-0.341643	0.988	0.994	2.18693e-89	down
CM vs HM	4 - Mono	4a - CD14+ Mono	AC020916.1	5.68785e-93	0.826947	0.685	0.395	1.23301e-88	up
CM vs HM	4 - Mono	4a - CD14+ Mono	NOL7	5.7584e-93	0.585192	0.381	0.107	1.24831e-88	up
CM vs HM	4 - Mono	4a - CD14+ Mono	OSBPL8	2.24219e-91	0.679457	0.596	0.294	4.86062e-87	up
CM vs HM	4 - Mono	4a - CD14+ Mono	STK17B	2.70916e-91	0.692925	0.724	0.471	5.87292e-87	up
CM vs HM	4 - Mono	4a - CD14+ Mono	ALKBH7	1.89288e-90	0.640765	0.554	0.248	4.10338e-86	up
CM vs HM	4 - Mono	4a - CD14+ Mono	TKT	3.05197e-90	-0.573424	0.946	0.97	6.61607e-86	down
CM vs HM	4 - Mono	4a - CD14+ Mono	RPS16	6.82679e-90	-0.405339	0.966	0.972	1.47991e-85	down
CM vs HM	4 - Mono	4a - CD14+ Mono	RPL23A	8.36999e-90	-0.503554	0.93	0.955	1.81445e-85	down
CM vs HM	4 - Mono	4a - CD14+ Mono	RPL10	2.29415e-89	-0.298113	0.996	0.999	4.97326e-85	down
CM vs HM	4 - Mono	4a - CD14+ Mono	LSP1	2.66099e-89	0.469832	0.964	0.932	5.7685e-85	up
CM vs HM	4 - Mono	4a - CD14+ Mono	DEK	2.78426e-89	0.663866	0.585	0.287	6.03571e-85	up
CM vs HM	4 - Mono	4a - CD14+ Mono	METTL26	4.94014e-89	0.588539	0.355	0.094	1.07092e-84	up
CM vs HM	4 - Mono	4a - CD14+ Mono	PNPLA2	5.2606e-89	0.596644	0.417	0.137	1.14039e-84	up
CM vs HM	4 - Mono	4a - CD14+ Mono	SCAND1	2.47867e-88	0.6216	0.722	0.415	5.37327e-84	up
CM vs HM	4 - Mono	4a - CD14+ Mono	RPL26	2.7626e-88	-0.316193	0.99	0.994	5.98875e-84	down
CM vs HM	4 - Mono	4a - CD14+ Mono	RPS24	7.15549e-88	-0.263871	0.995	0.999	1.55117e-83	down
CM vs HM	4 - Mono	4a - CD14+ Mono	PLBD1	7.59247e-88	0.816167	0.667	0.388	1.6459e-83	up
CM vs HM	4 - Mono	4a - CD14+ Mono	MT-ND4	3.24826e-87	-0.408502	0.982	0.992	7.04159e-83	down
CM vs HM	4 - Mono	4a - CD14+ Mono	ARPC2	4.49744e-87	0.435313	0.939	0.905	9.74955e-83	up
CM vs HM	4 - Mono	4a - CD14+ Mono	ISCU	6.67922e-87	0.619075	0.404	0.134	1.44792e-82	up
CM vs HM	4 - Mono	4a - CD14+ Mono	PYURF	1.44039e-86	0.573344	0.37	0.109	3.12247e-82	up
CM vs HM	4 - Mono	4a - CD14+ Mono	PYCARD	1.80427e-86	0.536373	0.918	0.708	3.91129e-82	up
CM vs HM	4 - Mono	4a - CD14+ Mono	EIF3F	5.65544e-86	0.618745	0.746	0.508	1.22599e-81	up
CM vs HM	4 - Mono	4a - CD14+ Mono	CEBPD	1.72959e-85	0.670597	0.497	0.208	3.74941e-81	up
CM vs HM	4 - Mono	4a - CD14+ Mono	MCL1	1.3417e-84	0.624092	0.864	0.683	2.90853e-80	up
CM vs HM	4 - Mono	4a - CD14+ Mono	RPL6	6.34694e-82	-0.309021	0.988	0.996	1.37589e-77	down
CM vs HM	4 - Mono	4a - CD14+ Mono	NOP53	1.36179e-81	0.575845	0.382	0.123	2.95209e-77	up
CM vs HM	4 - Mono	4a - CD14+ Mono	TYMP	1.46885e-81	0.692941	0.701	0.427	3.18417e-77	up
CM vs HM	4 - Mono	4a - CD14+ Mono	TMEM160	3.34387e-81	0.512696	0.281	0.059	7.24885e-77	up
CM vs HM	4 - Mono	4a - CD14+ Mono	CCNI	5.11109e-81	0.572943	0.84	0.682	1.10798e-76	up
CM vs HM	4 - Mono	4a - CD14+ Mono	RPS4X	1.64248e-80	-0.347146	0.983	0.996	3.56057e-76	down
CM vs HM	4 - Mono	4a - CD14+ Mono	FLNA	1.98862e-80	0.580879	0.855	0.639	4.31094e-76	up
CM vs HM	4 - Mono	4a - CD14+ Mono	RAB2A	3.78729e-80	0.589439	0.492	0.211	8.21009e-76	up
CM vs HM	4 - Mono	4a - CD14+ Mono	RPL5	4.03447e-79	-0.418618	0.95	0.979	8.74593e-75	down
CM vs HM	4 - Mono	4a - CD14+ Mono	RAB11FIP1	1.244e-78	0.656488	0.612	0.334	2.69675e-74	up
CM vs HM	4 - Mono	4a - CD14+ Mono	RPLP2	2.27752e-78	-0.307795	0.99	0.996	4.93721e-74	down
CM vs HM	4 - Mono	4a - CD14+ Mono	EMP3	2.65117e-78	0.493709	0.942	0.864	5.7472e-74	up
CM vs HM	4 - Mono	4a - CD14+ Mono	TGFB1	4.27632e-77	0.603547	0.434	0.168	9.2702e-73	up
CM vs HM	4 - Mono	4a - CD14+ Mono	AHNAK	5.10307e-77	0.619264	0.925	0.84	1.10624e-72	up
CM vs HM	4 - Mono	4a - CD14+ Mono	RACK1	1.03084e-76	-0.354178	0.972	0.992	2.23466e-72	down
CM vs HM	4 - Mono	4a - CD14+ Mono	RPL19	1.55724e-75	-0.246035	0.995	1	3.37578e-71	down
CM vs HM	4 - Mono	4a - CD14+ Mono	PSAP	1.01901e-73	-0.362782	0.981	0.99	2.20901e-69	down
CM vs HM	4 - Mono	4a - CD14+ Mono	RPL24	1.44137e-73	-0.342368	0.963	0.983	3.1246e-69	down
CM vs HM	4 - Mono	4a - CD14+ Mono	CD55	1.66529e-73	0.624947	0.53	0.256	3.61002e-69	up
CM vs HM	4 - Mono	4a - CD14+ Mono	RPL12	9.41107e-73	-0.28741	0.99	0.998	2.04013e-68	down
CM vs HM	4 - Mono	4a - CD14+ Mono	FBXO9	2.4475e-72	0.540432	0.373	0.13	5.3057e-68	up
CM vs HM	4 - Mono	4a - CD14+ Mono	SNHG5	9.11212e-72	0.612613	0.503	0.243	1.97533e-67	up
CM vs HM	4 - Mono	4a - CD14+ Mono	RPL18	1.01435e-71	-0.259961	0.994	0.996	2.19891e-67	down
CM vs HM	4 - Mono	4a - CD14+ Mono	EIF5A	2.38673e-71	0.554206	0.552	0.274	5.17396e-67	up
CM vs HM	4 - Mono	4a - CD14+ Mono	RPL35A	3.04285e-71	-0.280805	0.991	0.997	6.59628e-67	down
CM vs HM	4 - Mono	4a - CD14+ Mono	ODF3B	3.84395e-71	0.572848	0.506	0.238	8.33293e-67	up
CM vs HM	4 - Mono	4a - CD14+ Mono	RPL36A	4.52196e-71	-0.436111	0.918	0.953	9.8027e-67	down
CM vs HM	4 - Mono	4a - CD14+ Mono	UBE2J1	5.02297e-70	0.606042	0.495	0.237	1.08888e-65	up
CM vs HM	4 - Mono	4a - CD14+ Mono	RPS27A	7.01424e-70	-0.280591	0.994	0.997	1.52055e-65	down
CM vs HM	4 - Mono	4a - CD14+ Mono	FBXL15	8.38318e-70	0.459427	0.243	0.05	1.81731e-65	up
CM vs HM	4 - Mono	4a - CD14+ Mono	POLE4	1.1789e-69	0.581993	0.505	0.24	2.55562e-65	up
CM vs HM	4 - Mono	4a - CD14+ Mono	MT-ND6	1.21006e-69	-0.801724	0.37	0.563	2.62317e-65	down
CM vs HM	4 - Mono	4a - CD14+ Mono	RPL17	1.47415e-69	-0.384264	0.966	0.985	3.19565e-65	down
CM vs HM	4 - Mono	4a - CD14+ Mono	ITGB2	2.72821e-69	-0.378052	0.942	0.975	5.91421e-65	down
CM vs HM	4 - Mono	4a - CD14+ Mono	EIF1	5.65776e-69	-0.319921	0.99	0.996	1.22649e-64	down
CM vs HM	4 - Mono	4a - CD14+ Mono	FXYD5	9.89408e-69	-0.491406	0.931	0.96	2.14484e-64	down
CM vs HM	4 - Mono	4a - CD14+ Mono	RPL37A	1.58119e-68	-0.424621	0.934	0.947	3.42771e-64	down
CM vs HM	4 - Mono	4a - CD14+ Mono	RPL7	3.64217e-68	-0.383114	0.935	0.967	7.89549e-64	down
CM vs HM	4 - Mono	4a - CD14+ Mono	RPS25	3.5179e-66	-0.341001	0.957	0.98	7.62611e-62	down
CM vs HM	4 - Mono	4a - CD14+ Mono	S100A12	1.00848e-65	0.752962	0.953	0.901	2.18618e-61	up
CM vs HM	4 - Mono	4a - CD14+ Mono	DUT	1.84054e-65	0.462028	0.278	0.077	3.98992e-61	up
CM vs HM	4 - Mono	4a - CD14+ Mono	ALDH2	3.56579e-65	0.599358	0.667	0.435	7.72992e-61	up
CM vs HM	4 - Mono	4a - CD14+ Mono	EEF2	3.92972e-65	-0.449095	0.886	0.943	8.51885e-61	down
CM vs HM	4 - Mono	4a - CD14+ Mono	HLA-DQA1	5.90218e-65	-0.819056	0.138	0.329	1.27948e-60	down
CM vs HM	4 - Mono	4a - CD14+ Mono	RPL32	1.31819e-64	-0.223584	0.994	0.998	2.85758e-60	down
CM vs HM	4 - Mono	4a - CD14+ Mono	RPS12	1.60061e-64	-0.241691	0.996	0.997	3.46979e-60	down
CM vs HM	4 - Mono	4a - CD14+ Mono	SUMO3	2.33166e-64	0.503331	0.423	0.18	5.05457e-60	up
CM vs HM	4 - Mono	4a - CD14+ Mono	RPL13A	4.3172e-64	-0.427772	0.933	0.951	9.35883e-60	down
CM vs HM	4 - Mono	4a - CD14+ Mono	RPS6	4.76083e-64	-0.398235	0.953	0.976	1.03205e-59	down
CM vs HM	4 - Mono	4a - CD14+ Mono	PLEK	4.84284e-63	0.529627	0.819	0.623	1.04983e-58	up
CM vs HM	4 - Mono	4a - CD14+ Mono	GABARAP	8.65622e-63	-0.29932	0.991	0.995	1.87649e-58	down
CM vs HM	4 - Mono	4a - CD14+ Mono	HINT2	1.09439e-62	0.434212	0.235	0.054	2.37242e-58	up
CM vs HM	4 - Mono	4a - CD14+ Mono	PDCD6	1.14489e-62	0.467768	0.458	0.204	2.48188e-58	up
CM vs HM	4 - Mono	4a - CD14+ Mono	NFKBIZ	1.85823e-62	0.524862	0.606	0.352	4.02826e-58	up
CM vs HM	4 - Mono	4a - CD14+ Mono	WASF2	3.80122e-62	0.509405	0.74	0.52	8.24029e-58	up
CM vs HM	4 - Mono	4a - CD14+ Mono	CCDC85B	6.37313e-62	0.407731	0.236	0.055	1.38157e-57	up
CM vs HM	4 - Mono	4a - CD14+ Mono	TCEA1	1.2625e-61	0.549666	0.537	0.285	2.73685e-57	up
CM vs HM	4 - Mono	4a - CD14+ Mono	TUBA1A	1.97392e-61	0.632196	0.853	0.741	4.27906e-57	up
CM vs HM	4 - Mono	4a - CD14+ Mono	GTF3A	2.04607e-61	0.476077	0.414	0.176	4.43548e-57	up
CM vs HM	4 - Mono	4a - CD14+ Mono	MYDGF	5.4562e-61	0.447343	0.365	0.138	1.1828e-56	up
CM vs HM	4 - Mono	4a - CD14+ Mono	RPL10A	1.547e-60	-0.406274	0.904	0.946	3.35358e-56	down
CM vs HM	4 - Mono	4a - CD14+ Mono	GADD45GIP1	1.84555e-60	0.426329	0.26	0.071	4.00078e-56	up
CM vs HM	4 - Mono	4a - CD14+ Mono	BTF3	2.2548e-60	-0.384592	0.918	0.965	4.88794e-56	down
CM vs HM	4 - Mono	4a - CD14+ Mono	RALY	5.32918e-60	0.482472	0.402	0.168	1.15526e-55	up
CM vs HM	4 - Mono	4a - CD14+ Mono	TPT1	5.59589e-60	-0.327014	0.995	0.996	1.21308e-55	down
CM vs HM	4 - Mono	4a - CD14+ Mono	RPS13	5.69519e-60	-0.240532	0.993	0.998	1.2346e-55	down
CM vs HM	4 - Mono	4a - CD14+ Mono	TUSC2	1.1772e-59	0.405857	0.23	0.054	2.55193e-55	up
CM vs HM	4 - Mono	4a - CD14+ Mono	TPM3	3.53278e-59	0.377341	0.955	0.892	7.65836e-55	up
CM vs HM	4 - Mono	4a - CD14+ Mono	CYP27A1	9.45767e-59	0.556215	0.334	0.125	2.05023e-54	up
CM vs HM	4 - Mono	4a - CD14+ Mono	RPS18	2.1368e-58	-0.319245	0.981	0.99	4.63216e-54	down
CM vs HM	4 - Mono	4a - CD14+ Mono	EGR1	8.43868e-58	0.581119	0.46	0.228	1.82934e-53	up
CM vs HM	4 - Mono	4a - CD14+ Mono	ATP2B1-AS1	1.01412e-57	0.640255	0.704	0.485	2.19841e-53	up
CM vs HM	4 - Mono	4a - CD14+ Mono	ZNF467	1.07941e-57	0.41564	0.232	0.058	2.33995e-53	up
CM vs HM	4 - Mono	4a - CD14+ Mono	APBB1IP	1.14423e-56	0.484711	0.565	0.314	2.48046e-52	up
CM vs HM	4 - Mono	4a - CD14+ Mono	ROGDI	1.30947e-56	0.514125	0.395	0.176	2.83867e-52	up
CM vs HM	4 - Mono	4a - CD14+ Mono	RPS7	3.22191e-56	-0.249776	0.993	0.998	6.98446e-52	down
CM vs HM	4 - Mono	4a - CD14+ Mono	B2M	8.0542e-56	-0.302618	0.997	0.999	1.74599e-51	down
CM vs HM	4 - Mono	4a - CD14+ Mono	DDT	4.55414e-55	0.514232	0.621	0.388	9.87246e-51	up
CM vs HM	4 - Mono	4a - CD14+ Mono	HLA-DQA2	1.14806e-54	-0.282292	0.001	0.086	2.48876e-50	down
CM vs HM	4 - Mono	4a - CD14+ Mono	EMB	1.95114e-54	0.528559	0.416	0.195	4.22968e-50	up
CM vs HM	4 - Mono	4a - CD14+ Mono	ZFAS1	1.01407e-53	-0.489119	0.724	0.798	2.1983e-49	down
CM vs HM	4 - Mono	4a - CD14+ Mono	FBP1	1.30525e-53	0.47895	0.384	0.172	2.82952e-49	up
CM vs HM	4 - Mono	4a - CD14+ Mono	PPBP	2.37684e-53	0.735021	0.397	0.186	5.15252e-49	up
CM vs HM	4 - Mono	4a - CD14+ Mono	PTGER2	5.38765e-53	0.435885	0.242	0.071	1.16793e-48	up
CM vs HM	4 - Mono	4a - CD14+ Mono	ARF5	6.33709e-53	0.484092	0.712	0.495	1.37376e-48	up
CM vs HM	4 - Mono	4a - CD14+ Mono	RPL3	8.10423e-53	-0.365209	0.942	0.966	1.75683e-48	down
CM vs HM	4 - Mono	4a - CD14+ Mono	RNF149	9.05778e-53	0.550192	0.629	0.394	1.96355e-48	up
CM vs HM	4 - Mono	4a - CD14+ Mono	RPL34	2.61542e-52	-0.234831	0.994	0.997	5.66971e-48	down
CM vs HM	4 - Mono	4a - CD14+ Mono	NCBP2AS2	5.39656e-52	0.344835	0.221	0.058	1.16987e-47	up
CM vs HM	4 - Mono	4a - CD14+ Mono	RCSD1	7.22183e-52	0.487865	0.687	0.469	1.56555e-47	up
CM vs HM	4 - Mono	4a - CD14+ Mono	HBB	1.91014e-51	1.21087	0.124	0.007	4.1408e-47	up
CM vs HM	4 - Mono	4a - CD14+ Mono	SNHG29	2.29751e-51	-0.445745	0.754	0.848	4.98054e-47	down
CM vs HM	4 - Mono	4a - CD14+ Mono	TRIR	2.69321e-51	0.453593	0.431	0.209	5.83834e-47	up
CM vs HM	4 - Mono	4a - CD14+ Mono	NINJ1	8.01754e-51	0.491573	0.582	0.345	1.73804e-46	up
CM vs HM	4 - Mono	4a - CD14+ Mono	IMPDH1	9.81198e-51	0.461941	0.535	0.299	2.12704e-46	up
CM vs HM	4 - Mono	4a - CD14+ Mono	STX11	1.65201e-50	0.518948	0.531	0.307	3.58122e-46	up
CM vs HM	4 - Mono	4a - CD14+ Mono	RPS15	2.54734e-50	-0.208003	0.992	0.998	5.52213e-46	down
CM vs HM	4 - Mono	4a - CD14+ Mono	SMAP1	2.83003e-50	0.417265	0.284	0.101	6.13494e-46	up
CM vs HM	4 - Mono	4a - CD14+ Mono	GADD45B	7.98526e-50	-0.684137	0.407	0.557	1.73104e-45	down
CM vs HM	4 - Mono	4a - CD14+ Mono	H3F3B	1.0346e-49	0.31263	0.989	0.98	2.24281e-45	up
CM vs HM	4 - Mono	4a - CD14+ Mono	DUSP23	1.0916e-49	0.403164	0.343	0.142	2.36636e-45	up
CM vs HM	4 - Mono	4a - CD14+ Mono	HLA-DMA	2.10879e-49	-0.597209	0.468	0.61	4.57144e-45	down
CM vs HM	4 - Mono	4a - CD14+ Mono	COMMD7	3.04299e-49	0.382837	0.307	0.118	6.5966e-45	up
CM vs HM	4 - Mono	4a - CD14+ Mono	OSBPL11	4.95032e-49	0.426741	0.392	0.181	1.07313e-44	up
CM vs HM	4 - Mono	4a - CD14+ Mono	HLA-DQB1	5.38483e-49	-0.606049	0.283	0.455	1.16732e-44	down
CM vs HM	4 - Mono	4a - CD14+ Mono	UBE2F	7.55832e-49	0.389046	0.353	0.151	1.63849e-44	up
CM vs HM	4 - Mono	4a - CD14+ Mono	DDX17	2.57056e-48	0.484218	0.688	0.483	5.57246e-44	up
CM vs HM	4 - Mono	4a - CD14+ Mono	IL1B	2.64358e-48	0.653632	0.363	0.167	5.73076e-44	up
CM vs HM	4 - Mono	4a - CD14+ Mono	ARGLU1	3.55118e-48	0.504341	0.595	0.374	7.69824e-44	up
CM vs HM	4 - Mono	4a - CD14+ Mono	CAST	4.13577e-48	0.43781	0.726	0.533	8.96553e-44	up
CM vs HM	4 - Mono	4a - CD14+ Mono	SDF2L1	6.86756e-48	0.348514	0.196	0.049	1.48875e-43	up
CM vs HM	4 - Mono	4a - CD14+ Mono	MYADM	7.80028e-48	0.516184	0.649	0.44	1.69094e-43	up
CM vs HM	4 - Mono	4a - CD14+ Mono	LDLR	8.14503e-48	0.425661	0.249	0.082	1.76568e-43	up
CM vs HM	4 - Mono	4a - CD14+ Mono	C9orf16	1.3937e-47	0.449864	0.644	0.4	3.02126e-43	up
CM vs HM	4 - Mono	4a - CD14+ Mono	TOLLIP	1.68862e-47	0.416908	0.336	0.141	3.66059e-43	up
CM vs HM	4 - Mono	4a - CD14+ Mono	PAXX	2.09013e-47	0.404109	0.362	0.16	4.53099e-43	up
CM vs HM	4 - Mono	4a - CD14+ Mono	TMPO	1.01443e-46	0.473808	0.444	0.231	2.19907e-42	up
CM vs HM	4 - Mono	4a - CD14+ Mono	UBE2B	3.46109e-46	0.43157	0.42	0.212	7.50295e-42	up
CM vs HM	4 - Mono	4a - CD14+ Mono	ATP5MC2	4.06202e-46	-0.276031	0.969	0.986	8.80565e-42	down
CM vs HM	4 - Mono	4a - CD14+ Mono	FOS	7.14002e-46	0.318731	0.996	0.994	1.54781e-41	up
CM vs HM	4 - Mono	4a - CD14+ Mono	THBS1	1.0391e-45	0.543873	0.205	0.059	2.25257e-41	up
CM vs HM	4 - Mono	4a - CD14+ Mono	OSCAR	3.86016e-45	0.421143	0.482	0.261	8.36806e-41	up
CM vs HM	4 - Mono	4a - CD14+ Mono	CDKN1A	1.23643e-44	-0.491525	0.236	0.402	2.68034e-40	down
CM vs HM	4 - Mono	4a - CD14+ Mono	FOSB	1.62704e-44	0.547153	0.843	0.696	3.5271e-40	up
CM vs HM	4 - Mono	4a - CD14+ Mono	RRBP1	3.50542e-44	0.394633	0.327	0.14	7.59905e-40	up
CM vs HM	4 - Mono	4a - CD14+ Mono	AC007952.4	3.51442e-44	0.504015	0.478	0.268	7.61856e-40	up
CM vs HM	4 - Mono	4a - CD14+ Mono	H1FX	3.95085e-44	0.337045	0.154	0.03	8.56465e-40	up
CM vs HM	4 - Mono	4a - CD14+ Mono	ZNF524	1.66101e-43	0.371075	0.3	0.121	3.60074e-39	up
CM vs HM	4 - Mono	4a - CD14+ Mono	TMUB1	2.11412e-43	0.286042	0.132	0.019	4.58298e-39	up
CM vs HM	4 - Mono	4a - CD14+ Mono	RPS23	2.87432e-43	-0.20662	0.992	0.996	6.23096e-39	down
CM vs HM	4 - Mono	4a - CD14+ Mono	CHIC2	3.30846e-43	0.342746	0.247	0.087	7.17207e-39	up
CM vs HM	4 - Mono	4a - CD14+ Mono	HEBP1	3.95088e-43	0.355918	0.277	0.107	8.56472e-39	up
CM vs HM	4 - Mono	4a - CD14+ Mono	MTPN	6.79276e-43	0.421053	0.76	0.577	1.47254e-38	up
CM vs HM	4 - Mono	4a - CD14+ Mono	SLAIN2	7.76491e-43	0.361211	0.231	0.077	1.68328e-38	up
CM vs HM	4 - Mono	4a - CD14+ Mono	PHF11	8.87772e-43	0.362543	0.282	0.112	1.92451e-38	up
CM vs HM	4 - Mono	4a - CD14+ Mono	MPST	1.04642e-42	0.339399	0.255	0.092	2.26842e-38	up
CM vs HM	4 - Mono	4a - CD14+ Mono	KDM6B	1.19137e-42	0.417153	0.339	0.153	2.58265e-38	up
CM vs HM	4 - Mono	4a - CD14+ Mono	SENP6	1.72601e-42	0.411129	0.361	0.173	3.74164e-38	up
CM vs HM	4 - Mono	4a - CD14+ Mono	ADSS	2.46669e-42	0.409577	0.393	0.196	5.34728e-38	up
CM vs HM	4 - Mono	4a - CD14+ Mono	CCL3L1	2.62584e-42	-0.613326	0.045	0.157	5.69229e-38	down
CM vs HM	4 - Mono	4a - CD14+ Mono	ADI1	2.90498e-42	0.35234	0.296	0.12	6.29742e-38	up
CM vs HM	4 - Mono	4a - CD14+ Mono	LTB4R	4.4216e-42	0.343973	0.217	0.069	9.58513e-38	up
CM vs HM	4 - Mono	4a - CD14+ Mono	LRRFIP2	7.66329e-42	0.381846	0.296	0.125	1.66125e-37	up
CM vs HM	4 - Mono	4a - CD14+ Mono	CPNE1	1.55795e-41	0.378783	0.353	0.165	3.37732e-37	up
CM vs HM	4 - Mono	4a - CD14+ Mono	RPS8	1.57989e-41	-0.181358	0.993	0.999	3.42488e-37	down
CM vs HM	4 - Mono	4a - CD14+ Mono	MAFB	2.02966e-41	0.49031	0.444	0.248	4.3999e-37	up
CM vs HM	4 - Mono	4a - CD14+ Mono	HLA-DRB1	2.24386e-41	-0.421058	0.82	0.896	4.86425e-37	down
CM vs HM	4 - Mono	4a - CD14+ Mono	TREM1	2.57362e-41	0.503157	0.444	0.244	5.5791e-37	up
CM vs HM	4 - Mono	4a - CD14+ Mono	PPP1R15A	3.11054e-41	0.412016	0.798	0.624	6.74303e-37	up
CM vs HM	4 - Mono	4a - CD14+ Mono	UBA52	4.28708e-41	-0.219331	0.981	0.988	9.29353e-37	down
CM vs HM	4 - Mono	4a - CD14+ Mono	ANXA5	1.33638e-40	0.354867	0.867	0.777	2.89701e-36	up
CM vs HM	4 - Mono	4a - CD14+ Mono	CALM3	2.81144e-40	0.418437	0.594	0.386	6.09463e-36	up
CM vs HM	4 - Mono	4a - CD14+ Mono	PTPMT1	2.82339e-40	0.293443	0.186	0.053	6.12055e-36	up
CM vs HM	4 - Mono	4a - CD14+ Mono	SAT1	4.1201e-40	-0.387105	0.97	0.982	8.93155e-36	down
CM vs HM	4 - Mono	4a - CD14+ Mono	TOP1	4.4498e-40	0.394866	0.414	0.22	9.64628e-36	up
CM vs HM	4 - Mono	4a - CD14+ Mono	CYP1B1	4.94339e-40	0.525853	0.483	0.29	1.07163e-35	up
CM vs HM	4 - Mono	4a - CD14+ Mono	PTPRE	5.89978e-40	0.423791	0.763	0.585	1.27895e-35	up
CM vs HM	4 - Mono	4a - CD14+ Mono	YWHAZ	1.11031e-39	0.386211	0.834	0.703	2.40692e-35	up
CM vs HM	4 - Mono	4a - CD14+ Mono	IDS	3.69245e-39	0.440241	0.414	0.226	8.00449e-35	up
CM vs HM	4 - Mono	4a - CD14+ Mono	PPIA	4.15586e-39	-0.286589	0.923	0.953	9.00908e-35	down
CM vs HM	4 - Mono	4a - CD14+ Mono	ADGRE5	5.1992e-39	0.480511	0.723	0.548	1.12708e-34	up
CM vs HM	4 - Mono	4a - CD14+ Mono	PTTG1IP	6.00001e-39	0.419459	0.496	0.29	1.30068e-34	up
CM vs HM	4 - Mono	4a - CD14+ Mono	CSNK1A1	9.15431e-39	0.424899	0.525	0.32	1.98447e-34	up
CM vs HM	4 - Mono	4a - CD14+ Mono	TRIB1	1.44094e-38	0.394772	0.275	0.115	3.12368e-34	up
CM vs HM	4 - Mono	4a - CD14+ Mono	OVCA2	3.0891e-38	0.247226	0.128	0.023	6.69656e-34	up
CM vs HM	4 - Mono	4a - CD14+ Mono	VAPA	3.20537e-38	0.418657	0.591	0.389	6.94861e-34	up
CM vs HM	4 - Mono	4a - CD14+ Mono	ARPC5L	3.50943e-38	0.32468	0.219	0.076	7.60774e-34	up
CM vs HM	4 - Mono	4a - CD14+ Mono	BNIP2	3.82352e-38	0.41541	0.511	0.31	8.28863e-34	up
CM vs HM	4 - Mono	4a - CD14+ Mono	A1BG	3.99534e-38	0.377239	0.357	0.174	8.66111e-34	up
CM vs HM	4 - Mono	4a - CD14+ Mono	PF4	4.22462e-38	0.448282	0.195	0.062	9.15812e-34	up
CM vs HM	4 - Mono	4a - CD14+ Mono	ANXA11	6.07621e-38	0.386524	0.549	0.342	1.3172e-33	up
CM vs HM	4 - Mono	4a - CD14+ Mono	SLC25A6	7.35023e-38	-0.301273	0.922	0.957	1.59338e-33	down
CM vs HM	4 - Mono	4a - CD14+ Mono	ADIPOR1	1.12983e-37	0.368752	0.382	0.196	2.44925e-33	up
CM vs HM	4 - Mono	4a - CD14+ Mono	RHEB	1.26809e-37	0.335154	0.233	0.087	2.74897e-33	up
CM vs HM	4 - Mono	4a - CD14+ Mono	VTI1B	1.30866e-37	0.344403	0.398	0.209	2.83692e-33	up
CM vs HM	4 - Mono	4a - CD14+ Mono	EIF4EBP1	1.50377e-37	0.345245	0.514	0.3	3.25986e-33	up
CM vs HM	4 - Mono	4a - CD14+ Mono	UVRAG	1.56741e-37	0.333086	0.245	0.096	3.39783e-33	up
CM vs HM	4 - Mono	4a - CD14+ Mono	FAAP20	2.11337e-37	0.303496	0.194	0.063	4.58136e-33	up
CM vs HM	4 - Mono	4a - CD14+ Mono	FLOT1	5.2624e-37	0.371962	0.485	0.283	1.14078e-32	up
CM vs HM	4 - Mono	4a - CD14+ Mono	GPX4	7.38261e-37	-0.350789	0.784	0.842	1.6004e-32	down
CM vs HM	4 - Mono	4a - CD14+ Mono	EEF1G	9.98762e-37	-0.291741	0.906	0.941	2.16512e-32	down
CM vs HM	4 - Mono	4a - CD14+ Mono	NDUFAB1	1.05603e-36	0.340274	0.524	0.316	2.28926e-32	up
CM vs HM	4 - Mono	4a - CD14+ Mono	RER1	1.52825e-36	0.322755	0.357	0.175	3.31294e-32	up
CM vs HM	4 - Mono	4a - CD14+ Mono	RPS11	1.85055e-36	-0.291616	0.926	0.939	4.01162e-32	down
CM vs HM	4 - Mono	4a - CD14+ Mono	METRNL	1.93936e-36	0.366587	0.234	0.09	4.20415e-32	up
CM vs HM	4 - Mono	4a - CD14+ Mono	KIF2A	2.75179e-36	0.310237	0.207	0.072	5.96533e-32	up
CM vs HM	4 - Mono	4a - CD14+ Mono	ACAA1	3.10884e-36	0.346796	0.371	0.19	6.73934e-32	up
CM vs HM	4 - Mono	4a - CD14+ Mono	S100A6	3.32759e-36	0.205806	0.997	0.999	7.21356e-32	up
CM vs HM	4 - Mono	4a - CD14+ Mono	EEF1D	3.49152e-36	-0.270289	0.957	0.974	7.56892e-32	down
CM vs HM	4 - Mono	4a - CD14+ Mono	RPS19BP1	4.23148e-36	0.352282	0.438	0.24	9.17299e-32	up
CM vs HM	4 - Mono	4a - CD14+ Mono	TRADD	4.24337e-36	0.291761	0.173	0.051	9.19878e-32	up
CM vs HM	4 - Mono	4a - CD14+ Mono	CD302	4.3331e-36	0.442083	0.668	0.484	9.3933e-32	up
CM vs HM	4 - Mono	4a - CD14+ Mono	LTBR	4.82218e-36	0.345704	0.416	0.226	1.04535e-31	up
CM vs HM	4 - Mono	4a - CD14+ Mono	SNRNP70	8.72184e-36	0.347097	0.263	0.11	1.89072e-31	up
CM vs HM	4 - Mono	4a - CD14+ Mono	CALM2	1.17088e-35	0.357328	0.865	0.794	2.53824e-31	up
CM vs HM	4 - Mono	4a - CD14+ Mono	PPM1G	1.46347e-35	0.344499	0.311	0.146	3.1725e-31	up
CM vs HM	4 - Mono	4a - CD14+ Mono	SHTN1	1.57523e-35	0.387685	0.353	0.182	3.41478e-31	up
CM vs HM	4 - Mono	4a - CD14+ Mono	LRRFIP1	1.69365e-35	0.396487	0.78	0.629	3.6715e-31	up
CM vs HM	4 - Mono	4a - CD14+ Mono	VSTM1	2.2745e-35	0.349936	0.31	0.144	4.93067e-31	up
CM vs HM	4 - Mono	4a - CD14+ Mono	NAAA	3.14798e-35	0.372222	0.443	0.254	6.8242e-31	up
CM vs HM	4 - Mono	4a - CD14+ Mono	RANBP1	3.90464e-35	0.274677	0.203	0.071	8.46448e-31	up
CM vs HM	4 - Mono	4a - CD14+ Mono	SLC25A39	5.59599e-35	0.278663	0.214	0.079	1.2131e-30	up
CM vs HM	4 - Mono	4a - CD14+ Mono	RASGRP2	5.85014e-35	0.398437	0.441	0.254	1.26819e-30	up
CM vs HM	4 - Mono	4a - CD14+ Mono	MCEMP1	6.1068e-35	0.43496	0.439	0.254	1.32383e-30	up
CM vs HM	4 - Mono	4a - CD14+ Mono	NPC2	7.65831e-35	-0.340458	0.856	0.898	1.66017e-30	down
CM vs HM	4 - Mono	4a - CD14+ Mono	MED30	7.7608e-35	0.275897	0.186	0.061	1.68239e-30	up
CM vs HM	4 - Mono	4a - CD14+ Mono	PREB	8.14719e-35	0.282485	0.182	0.059	1.76615e-30	up
CM vs HM	4 - Mono	4a - CD14+ Mono	SLC66A3	9.16665e-35	0.313215	0.27	0.118	1.98715e-30	up
CM vs HM	4 - Mono	4a - CD14+ Mono	MRPS26	1.0547e-34	0.247662	0.146	0.037	2.28637e-30	up
CM vs HM	4 - Mono	4a - CD14+ Mono	RWDD4	1.64469e-34	0.243325	0.147	0.037	3.56535e-30	up
CM vs HM	4 - Mono	4a - CD14+ Mono	NAA10	2.51161e-34	0.340645	0.311	0.148	5.44467e-30	up
CM vs HM	4 - Mono	4a - CD14+ Mono	LINC01637	2.78227e-34	0.234157	0.124	0.025	6.0314e-30	up
CM vs HM	4 - Mono	4a - CD14+ Mono	RPL39	3.13949e-34	-0.186799	0.994	0.997	6.80578e-30	down
CM vs HM	4 - Mono	4a - CD14+ Mono	NT5C	3.22095e-34	0.298	0.166	0.05	6.98238e-30	up
CM vs HM	4 - Mono	4a - CD14+ Mono	RPL27A	4.38637e-34	-0.412283	0.798	0.818	9.50876e-30	down
CM vs HM	4 - Mono	4a - CD14+ Mono	BTG2	4.83952e-34	0.509574	0.618	0.441	1.04911e-29	up
CM vs HM	4 - Mono	4a - CD14+ Mono	METTL9	5.17371e-34	0.376233	0.546	0.354	1.12156e-29	up
CM vs HM	4 - Mono	4a - CD14+ Mono	MAP3K8	7.51866e-34	0.409552	0.3	0.145	1.62989e-29	up
CM vs HM	4 - Mono	4a - CD14+ Mono	TSEN34	1.99452e-33	0.309276	0.281	0.127	4.32372e-29	up
CM vs HM	4 - Mono	4a - CD14+ Mono	TMEM259	2.00282e-33	0.28073	0.222	0.085	4.34171e-29	up
CM vs HM	4 - Mono	4a - CD14+ Mono	AC100810.1	2.25428e-33	0.244603	0.144	0.037	4.88683e-29	up
CM vs HM	4 - Mono	4a - CD14+ Mono	HP1BP3	3.85892e-33	0.373363	0.473	0.284	8.36536e-29	up
CM vs HM	4 - Mono	4a - CD14+ Mono	TMEM91	6.18095e-33	0.344305	0.279	0.127	1.33991e-28	up
CM vs HM	4 - Mono	4a - CD14+ Mono	ITPRIP	9.55237e-33	0.319556	0.204	0.077	2.07076e-28	up
CM vs HM	4 - Mono	4a - CD14+ Mono	PFDN5	1.12971e-32	-0.194415	0.983	0.992	2.44899e-28	down
CM vs HM	4 - Mono	4a - CD14+ Mono	RPSA	1.17004e-32	-0.314517	0.88	0.911	2.53642e-28	down
CM vs HM	4 - Mono	4a - CD14+ Mono	COMTD1	1.74905e-32	0.231991	0.114	0.022	3.7916e-28	up
CM vs HM	4 - Mono	4a - CD14+ Mono	VCAN	1.99803e-32	0.312112	0.975	0.949	4.33132e-28	up
CM vs HM	4 - Mono	4a - CD14+ Mono	NDFIP1	2.39503e-32	0.319511	0.321	0.16	5.19195e-28	up
CM vs HM	4 - Mono	4a - CD14+ Mono	RPL30	3.80633e-32	-0.171529	0.996	0.998	8.25136e-28	down
CM vs HM	4 - Mono	4a - CD14+ Mono	SERF2	3.94721e-32	0.217011	0.991	0.994	8.55677e-28	up
CM vs HM	4 - Mono	4a - CD14+ Mono	HK3	5.27737e-32	0.391423	0.575	0.389	1.14403e-27	up
CM vs HM	4 - Mono	4a - CD14+ Mono	TMEM183A	6.41497e-32	0.289331	0.288	0.135	1.39064e-27	up
CM vs HM	4 - Mono	4a - CD14+ Mono	IFNAR2	8.50574e-32	0.292243	0.24	0.102	1.84387e-27	up
CM vs HM	4 - Mono	4a - CD14+ Mono	RPS27	1.0078e-31	-0.274565	0.962	0.968	2.18472e-27	down
CM vs HM	4 - Mono	4a - CD14+ Mono	PTCH2	1.04957e-31	0.624303	0.312	0.164	2.27527e-27	up
CM vs HM	4 - Mono	4a - CD14+ Mono	RFLNB	1.13238e-31	0.312779	0.247	0.107	2.45478e-27	up
CM vs HM	4 - Mono	4a - CD14+ Mono	EDF1	1.17601e-31	-0.330533	0.778	0.828	2.54935e-27	down
CM vs HM	4 - Mono	4a - CD14+ Mono	HDAC10	1.80696e-31	0.252411	0.159	0.049	3.91712e-27	up
CM vs HM	4 - Mono	4a - CD14+ Mono	EML3	1.80952e-31	0.250896	0.168	0.054	3.92269e-27	up
CM vs HM	4 - Mono	4a - CD14+ Mono	C7orf50	2.43722e-31	0.278875	0.264	0.119	5.2834e-27	up
CM vs HM	4 - Mono	4a - CD14+ Mono	EIF3H	2.45336e-31	-0.344783	0.736	0.803	5.31839e-27	down
CM vs HM	4 - Mono	4a - CD14+ Mono	CD99	2.80665e-31	0.400945	0.738	0.592	6.08427e-27	up
CM vs HM	4 - Mono	4a - CD14+ Mono	BST1	4.80432e-31	0.343159	0.428	0.249	1.04148e-26	up
CM vs HM	4 - Mono	4a - CD14+ Mono	ERP29	5.23853e-31	-0.361431	0.767	0.815	1.13561e-26	down
CM vs HM	4 - Mono	4a - CD14+ Mono	NR4A1	7.40574e-31	-0.406307	0.163	0.294	1.60542e-26	down
CM vs HM	4 - Mono	4a - CD14+ Mono	ALOX5AP	7.47453e-31	0.333174	0.353	0.186	1.62033e-26	up
CM vs HM	4 - Mono	4a - CD14+ Mono	MTMR14	8.31897e-31	0.324283	0.379	0.207	1.80339e-26	up
CM vs HM	4 - Mono	4a - CD14+ Mono	XPA	1.11178e-30	0.228033	0.164	0.053	2.41012e-26	up
CM vs HM	4 - Mono	4a - CD14+ Mono	TMX4	1.23701e-30	0.333967	0.251	0.115	2.68159e-26	up
CM vs HM	4 - Mono	4a - CD14+ Mono	RPL41	1.32949e-30	-0.231941	0.964	0.979	2.88207e-26	down
CM vs HM	4 - Mono	4a - CD14+ Mono	ANKRD28	1.49147e-30	0.280059	0.149	0.044	3.23321e-26	up
CM vs HM	4 - Mono	4a - CD14+ Mono	HNRNPA1	1.72341e-30	-0.323565	0.819	0.858	3.73602e-26	down
CM vs HM	4 - Mono	4a - CD14+ Mono	SF1	2.13865e-30	0.388855	0.614	0.434	4.63616e-26	up
CM vs HM	4 - Mono	4a - CD14+ Mono	ANXA1	2.16083e-30	0.320277	0.907	0.85	4.68424e-26	up
CM vs HM	4 - Mono	4a - CD14+ Mono	SMCO4	2.20234e-30	0.35837	0.467	0.286	4.77423e-26	up
CM vs HM	4 - Mono	4a - CD14+ Mono	AL135905.2	2.39827e-30	0.189774	0.101	0.017	5.19896e-26	up
CM vs HM	4 - Mono	4a - CD14+ Mono	TIPARP	3.76143e-30	0.2963	0.188	0.07	8.15402e-26	up
CM vs HM	4 - Mono	4a - CD14+ Mono	NAPRT	6.42573e-30	0.340145	0.374	0.207	1.39297e-25	up
CM vs HM	4 - Mono	4a - CD14+ Mono	VASP	6.751e-30	0.357215	0.649	0.477	1.46348e-25	up
CM vs HM	4 - Mono	4a - CD14+ Mono	MBP	7.43821e-30	0.330646	0.388	0.219	1.61245e-25	up
CM vs HM	4 - Mono	4a - CD14+ Mono	DPP7	7.472e-30	0.335454	0.382	0.216	1.61978e-25	up
CM vs HM	4 - Mono	4a - CD14+ Mono	CCND3	7.87952e-30	0.347549	0.442	0.269	1.70812e-25	up
CM vs HM	4 - Mono	4a - CD14+ Mono	UHMK1	1.22604e-29	0.283654	0.268	0.124	2.65781e-25	up
CM vs HM	4 - Mono	4a - CD14+ Mono	GDI2	1.25707e-29	-0.385245	0.656	0.714	2.72507e-25	down
CM vs HM	4 - Mono	4a - CD14+ Mono	FTL	1.74329e-29	-0.156896	0.999	1	3.7791e-25	down
CM vs HM	4 - Mono	4a - CD14+ Mono	CDK2AP2	1.82286e-29	0.352377	0.395	0.229	3.95159e-25	up
CM vs HM	4 - Mono	4a - CD14+ Mono	MEF2A	2.5255e-29	0.267482	0.279	0.133	5.47477e-25	up
CM vs HM	4 - Mono	4a - CD14+ Mono	CMTM7	2.53399e-29	0.291945	0.305	0.154	5.49318e-25	up
CM vs HM	4 - Mono	4a - CD14+ Mono	VCP	2.5911e-29	0.340964	0.435	0.261	5.617e-25	up
CM vs HM	4 - Mono	4a - CD14+ Mono	VAT1	2.59135e-29	0.215221	0.137	0.039	5.61754e-25	up
CM vs HM	4 - Mono	4a - CD14+ Mono	RNASEK	3.13903e-29	-0.225618	0.977	0.987	6.80479e-25	down
CM vs HM	4 - Mono	4a - CD14+ Mono	NOTCH2NLB	3.16867e-29	-0.170469	0.004	0.056	6.86904e-25	down
CM vs HM	4 - Mono	4a - CD14+ Mono	TSC22D3	4.22902e-29	0.410341	0.751	0.616	9.16766e-25	up
CM vs HM	4 - Mono	4a - CD14+ Mono	RPLP0	4.87622e-29	-0.227222	0.965	0.981	1.05707e-24	down
CM vs HM	4 - Mono	4a - CD14+ Mono	GALK1	8.37964e-29	0.280045	0.304	0.153	1.81654e-24	up
CM vs HM	4 - Mono	4a - CD14+ Mono	ADA2	9.1985e-29	-0.409981	0.537	0.627	1.99405e-24	down
CM vs HM	4 - Mono	4a - CD14+ Mono	DSC2	9.38886e-29	0.294075	0.182	0.069	2.03532e-24	up
CM vs HM	4 - Mono	4a - CD14+ Mono	UBXN4	9.48259e-29	0.315215	0.432	0.26	2.05564e-24	up
CM vs HM	4 - Mono	4a - CD14+ Mono	NUDT14	1.29958e-28	0.225544	0.121	0.031	2.81724e-24	up
CM vs HM	4 - Mono	4a - CD14+ Mono	SARAF	1.58521e-28	0.347181	0.668	0.509	3.43642e-24	up
CM vs HM	4 - Mono	4a - CD14+ Mono	XRCC5	1.66787e-28	0.359403	0.604	0.432	3.61561e-24	up
CM vs HM	4 - Mono	4a - CD14+ Mono	IARS2	2.07967e-28	0.269238	0.241	0.109	4.50831e-24	up
CM vs HM	4 - Mono	4a - CD14+ Mono	CIRBP	2.27135e-28	-0.380387	0.586	0.666	4.92384e-24	down
CM vs HM	4 - Mono	4a - CD14+ Mono	PAFAH1B1	3.44713e-28	0.322306	0.381	0.216	7.47268e-24	up
CM vs HM	4 - Mono	4a - CD14+ Mono	ANO6	3.8359e-28	0.302593	0.293	0.151	8.31547e-24	up
CM vs HM	4 - Mono	4a - CD14+ Mono	EMC6	4.12572e-28	0.235089	0.334	0.175	8.94375e-24	up
CM vs HM	4 - Mono	4a - CD14+ Mono	SH3GLB1	4.28591e-28	0.339464	0.407	0.24	9.291e-24	up
CM vs HM	4 - Mono	4a - CD14+ Mono	RILPL2	4.69743e-28	0.326538	0.662	0.48	1.01831e-23	up
CM vs HM	4 - Mono	4a - CD14+ Mono	YTHDC1	5.20322e-28	0.337482	0.358	0.199	1.12796e-23	up
CM vs HM	4 - Mono	4a - CD14+ Mono	TESC	6.51794e-28	0.296468	0.23	0.103	1.41296e-23	up
CM vs HM	4 - Mono	4a - CD14+ Mono	RPL35	7.29817e-28	-0.23175	0.944	0.96	1.5821e-23	down
CM vs HM	4 - Mono	4a - CD14+ Mono	DDIT4	8.08927e-28	-0.358461	0.041	0.123	1.75359e-23	down
CM vs HM	4 - Mono	4a - CD14+ Mono	RNASEH2C	8.29809e-28	0.312342	0.415	0.245	1.79886e-23	up
CM vs HM	4 - Mono	4a - CD14+ Mono	LAPTM5	8.59119e-28	-0.241934	0.936	0.964	1.8624e-23	down
CM vs HM	4 - Mono	4a - CD14+ Mono	ZNF106	1.01446e-27	0.326271	0.666	0.486	2.19914e-23	up
CM vs HM	4 - Mono	4a - CD14+ Mono	HNRNPU	1.21984e-27	0.396448	0.71	0.557	2.64437e-23	up
CM vs HM	4 - Mono	4a - CD14+ Mono	PRKAR1A	1.64229e-27	0.333579	0.578	0.395	3.56016e-23	up
CM vs HM	4 - Mono	4a - CD14+ Mono	NRGN	2.01331e-27	0.358026	0.402	0.239	4.36446e-23	up
CM vs HM	4 - Mono	4a - CD14+ Mono	C22orf39	2.73076e-27	0.265468	0.165	0.06	5.91975e-23	up
CM vs HM	4 - Mono	4a - CD14+ Mono	MIF	2.82257e-27	0.280775	0.68	0.466	6.11876e-23	up
CM vs HM	4 - Mono	4a - CD14+ Mono	EFCAB2	2.92523e-27	0.244777	0.133	0.04	6.34131e-23	up
CM vs HM	4 - Mono	4a - CD14+ Mono	IPMK	2.99916e-27	0.275973	0.186	0.073	6.50158e-23	up
CM vs HM	4 - Mono	4a - CD14+ Mono	RPS19	3.24751e-27	-0.196208	0.988	0.994	7.03996e-23	down
CM vs HM	4 - Mono	4a - CD14+ Mono	RRAGA	3.9504e-27	0.228667	0.174	0.065	8.56367e-23	up
CM vs HM	4 - Mono	4a - CD14+ Mono	CISD3	3.97724e-27	0.228413	0.174	0.065	8.62187e-23	up
CM vs HM	4 - Mono	4a - CD14+ Mono	KIF5B	4.32894e-27	0.324265	0.441	0.271	9.38427e-23	up
CM vs HM	4 - Mono	4a - CD14+ Mono	SUDS3	6.026e-27	0.219059	0.128	0.038	1.30632e-22	up
CM vs HM	4 - Mono	4a - CD14+ Mono	JUP	7.54685e-27	0.247983	0.166	0.061	1.63601e-22	up
CM vs HM	4 - Mono	4a - CD14+ Mono	LAGE3	7.96736e-27	0.236371	0.125	0.036	1.72716e-22	up
CM vs HM	4 - Mono	4a - CD14+ Mono	FAU	9.06496e-27	-0.135684	0.995	0.999	1.9651e-22	down
CM vs HM	4 - Mono	4a - CD14+ Mono	AP1M1	9.21661e-27	0.290032	0.305	0.16	1.99798e-22	up
CM vs HM	4 - Mono	4a - CD14+ Mono	MAF1	1.04e-26	0.269866	0.292	0.149	2.25452e-22	up
CM vs HM	4 - Mono	4a - CD14+ Mono	VIM-AS1	1.20267e-26	0.31492	0.194	0.081	2.60715e-22	up
CM vs HM	4 - Mono	4a - CD14+ Mono	PADI4	1.49652e-26	0.369527	0.342	0.194	3.24416e-22	up
CM vs HM	4 - Mono	4a - CD14+ Mono	ATF3	2.89762e-26	0.272	0.198	0.083	6.28147e-22	up
CM vs HM	4 - Mono	4a - CD14+ Mono	TMOD3	4.4287e-26	0.291978	0.478	0.304	9.60053e-22	up
CM vs HM	4 - Mono	4a - CD14+ Mono	BCL2A1	4.43604e-26	0.372052	0.61	0.435	9.61645e-22	up
CM vs HM	4 - Mono	4a - CD14+ Mono	TRABD	4.48626e-26	0.332592	0.423	0.257	9.72532e-22	up
CM vs HM	4 - Mono	4a - CD14+ Mono	SEC11A	5.36355e-26	-0.350855	0.692	0.745	1.16271e-21	down
CM vs HM	4 - Mono	4a - CD14+ Mono	HMGXB3	5.6919e-26	0.24452	0.161	0.059	1.23389e-21	up
CM vs HM	4 - Mono	4a - CD14+ Mono	GSK3B	5.91265e-26	0.257843	0.228	0.104	1.28174e-21	up
CM vs HM	4 - Mono	4a - CD14+ Mono	MALAT1	5.9792e-26	-0.161517	0.997	0.996	1.29617e-21	down
CM vs HM	4 - Mono	4a - CD14+ Mono	SMARCB1	6.17083e-26	0.238336	0.223	0.1	1.33771e-21	up
CM vs HM	4 - Mono	4a - CD14+ Mono	CPD	7.28738e-26	0.269737	0.274	0.138	1.57976e-21	up
CM vs HM	4 - Mono	4a - CD14+ Mono	SELENOS	7.44672e-26	0.272191	0.277	0.142	1.6143e-21	up
CM vs HM	4 - Mono	4a - CD14+ Mono	LILRA5	9.07724e-26	0.369436	0.705	0.565	1.96776e-21	up
CM vs HM	4 - Mono	4a - CD14+ Mono	SAMHD1	1.08613e-25	0.253418	0.884	0.803	2.35452e-21	up
CM vs HM	4 - Mono	4a - CD14+ Mono	CAPRIN1	1.09768e-25	0.295294	0.318	0.173	2.37955e-21	up
CM vs HM	4 - Mono	4a - CD14+ Mono	CD63	1.35076e-25	0.411432	0.716	0.587	2.92819e-21	up
CM vs HM	4 - Mono	4a - CD14+ Mono	MRPL23	1.79023e-25	0.214836	0.131	0.041	3.88086e-21	up
CM vs HM	4 - Mono	4a - CD14+ Mono	PABPC1	1.99503e-25	-0.245976	0.96	0.981	4.32483e-21	down
CM vs HM	4 - Mono	4a - CD14+ Mono	STAB1	2.36489e-25	0.367022	0.519	0.355	5.12661e-21	up
CM vs HM	4 - Mono	4a - CD14+ Mono	AC245014.3	2.49311e-25	0.397229	0.273	0.145	5.40456e-21	up
CM vs HM	4 - Mono	4a - CD14+ Mono	CR1	2.5295e-25	0.326896	0.326	0.182	5.48345e-21	up
CM vs HM	4 - Mono	4a - CD14+ Mono	SLC39A3	3.19774e-25	0.190136	0.12	0.035	6.93206e-21	up
CM vs HM	4 - Mono	4a - CD14+ Mono	TMEM147	3.38442e-25	0.253013	0.314	0.167	7.33674e-21	up
CM vs HM	4 - Mono	4a - CD14+ Mono	CDC42	3.97805e-25	0.273838	0.833	0.741	8.62362e-21	up
CM vs HM	4 - Mono	4a - CD14+ Mono	SDF4	5.25682e-25	0.256243	0.206	0.092	1.13957e-20	up
CM vs HM	4 - Mono	4a - CD14+ Mono	IMP3	6.36543e-25	0.226298	0.317	0.17	1.3799e-20	up
CM vs HM	4 - Mono	4a - CD14+ Mono	PPP1R2	6.52885e-25	0.289099	0.392	0.231	1.41532e-20	up
CM vs HM	4 - Mono	4a - CD14+ Mono	YWHAG	6.56807e-25	0.280767	0.339	0.191	1.42383e-20	up
CM vs HM	4 - Mono	4a - CD14+ Mono	AC087239.1	7.2903e-25	0.234465	0.132	0.042	1.58039e-20	up
CM vs HM	4 - Mono	4a - CD14+ Mono	BCL6	9.92388e-25	0.303607	0.245	0.12	2.1513e-20	up
CM vs HM	4 - Mono	4a - CD14+ Mono	NPM1	1.07e-24	-0.357206	0.637	0.693	2.31954e-20	down
CM vs HM	4 - Mono	4a - CD14+ Mono	AGTPBP1	1.2635e-24	0.311558	0.395	0.24	2.73902e-20	up
CM vs HM	4 - Mono	4a - CD14+ Mono	LUCAT1	1.51577e-24	0.365429	0.133	0.044	3.28588e-20	up
CM vs HM	4 - Mono	4a - CD14+ Mono	PHF3	1.70701e-24	0.284282	0.356	0.206	3.70046e-20	up
CM vs HM	4 - Mono	4a - CD14+ Mono	MVB12A	1.73727e-24	0.22272	0.228	0.106	3.76606e-20	up
CM vs HM	4 - Mono	4a - CD14+ Mono	ITPRID2	1.75245e-24	0.278137	0.247	0.122	3.79897e-20	up
CM vs HM	4 - Mono	4a - CD14+ Mono	MALSU1	1.95575e-24	0.227935	0.142	0.049	4.23968e-20	up
CM vs HM	4 - Mono	4a - CD14+ Mono	UNC119	2.12437e-24	0.231714	0.261	0.131	4.60521e-20	up
CM vs HM	4 - Mono	4a - CD14+ Mono	YDJC	2.57983e-24	0.213335	0.122	0.038	5.59255e-20	up
CM vs HM	4 - Mono	4a - CD14+ Mono	GSTK1	2.88672e-24	-0.337372	0.667	0.715	6.25783e-20	down
CM vs HM	4 - Mono	4a - CD14+ Mono	SMIM25	3.45781e-24	0.342524	0.582	0.409	7.49583e-20	up
CM vs HM	4 - Mono	4a - CD14+ Mono	AGGF1	4.32339e-24	0.250921	0.225	0.107	9.37224e-20	up
CM vs HM	4 - Mono	4a - CD14+ Mono	PID1	4.41728e-24	0.303704	0.189	0.083	9.57579e-20	up
CM vs HM	4 - Mono	4a - CD14+ Mono	AC253572.2	4.44826e-24	0.502354	0.346	0.208	9.64293e-20	up
CM vs HM	4 - Mono	4a - CD14+ Mono	P4HB	4.54082e-24	0.2998	0.589	0.414	9.84359e-20	up
CM vs HM	4 - Mono	4a - CD14+ Mono	ARHGDIB	4.67622e-24	-0.24321	0.932	0.956	1.01371e-19	down
CM vs HM	4 - Mono	4a - CD14+ Mono	TLN1	4.95998e-24	0.326893	0.736	0.606	1.07522e-19	up
CM vs HM	4 - Mono	4a - CD14+ Mono	AIF1	6.2149e-24	0.190219	0.984	0.988	1.34727e-19	up
CM vs HM	4 - Mono	4a - CD14+ Mono	RBM17	6.70095e-24	0.245097	0.3	0.162	1.45263e-19	up
CM vs HM	4 - Mono	4a - CD14+ Mono	CHI3L2	6.95874e-24	0.180092	0.063	0.006	1.50852e-19	up
CM vs HM	4 - Mono	4a - CD14+ Mono	ACADVL	7.90843e-24	0.329965	0.412	0.259	1.71439e-19	up
CM vs HM	4 - Mono	4a - CD14+ Mono	TMEM134	8.02625e-24	0.217661	0.142	0.05	1.73993e-19	up
CM vs HM	4 - Mono	4a - CD14+ Mono	LSM4	8.42773e-24	0.244236	0.356	0.206	1.82696e-19	up
CM vs HM	4 - Mono	4a - CD14+ Mono	EFCAB14	1.08284e-23	0.245972	0.292	0.157	2.34737e-19	up
CM vs HM	4 - Mono	4a - CD14+ Mono	TMEM107	1.18375e-23	0.447884	0.326	0.192	2.56613e-19	up
CM vs HM	4 - Mono	4a - CD14+ Mono	PDIA3	1.18741e-23	0.29884	0.432	0.278	2.57406e-19	up
CM vs HM	4 - Mono	4a - CD14+ Mono	AGPAT2	1.32483e-23	0.222588	0.263	0.133	2.87198e-19	up
CM vs HM	4 - Mono	4a - CD14+ Mono	C15orf61	1.74179e-23	0.16902	0.101	0.026	3.77585e-19	up
CM vs HM	4 - Mono	4a - CD14+ Mono	ID2	1.77188e-23	-0.571149	0.363	0.459	3.84109e-19	down
CM vs HM	4 - Mono	4a - CD14+ Mono	CAVIN2	1.77407e-23	0.309022	0.149	0.057	3.84584e-19	up
CM vs HM	4 - Mono	4a - CD14+ Mono	2024-03-05	1.82622e-23	0.198474	0.13	0.043	3.95887e-19	up
CM vs HM	4 - Mono	4a - CD14+ Mono	PKN1	1.9353e-23	0.248201	0.412	0.248	4.19534e-19	up
CM vs HM	4 - Mono	4a - CD14+ Mono	NLRP12	2.54968e-23	0.284752	0.362	0.216	5.5272e-19	up
CM vs HM	4 - Mono	4a - CD14+ Mono	ACSL4	2.55621e-23	0.243415	0.302	0.166	5.54136e-19	up
CM vs HM	4 - Mono	4a - CD14+ Mono	FERMT3	2.80326e-23	0.290368	0.702	0.55	6.0769e-19	up
CM vs HM	4 - Mono	4a - CD14+ Mono	CWC25	3.1989e-23	0.285935	0.32	0.183	6.93458e-19	up
CM vs HM	4 - Mono	4a - CD14+ Mono	ID1	3.7197e-23	0.300275	0.151	0.058	8.06356e-19	up
CM vs HM	4 - Mono	4a - CD14+ Mono	IFI30	4.64246e-23	-0.18124	0.992	0.998	1.00639e-18	down
CM vs HM	4 - Mono	4a - CD14+ Mono	SMIM10L1	5.0369e-23	0.219087	0.16	0.064	1.0919e-18	up
CM vs HM	4 - Mono	4a - CD14+ Mono	CTBS	5.31676e-23	0.257079	0.223	0.109	1.15257e-18	up
CM vs HM	4 - Mono	4a - CD14+ Mono	EFR3A	5.67034e-23	0.218889	0.211	0.098	1.22922e-18	up
CM vs HM	4 - Mono	4a - CD14+ Mono	PSME2	6.8208e-23	-0.397483	0.629	0.682	1.47861e-18	down
CM vs HM	4 - Mono	4a - CD14+ Mono	INSIG1	6.98325e-23	0.263967	0.125	0.041	1.51383e-18	up
CM vs HM	4 - Mono	4a - CD14+ Mono	CYC1	7.54808e-23	0.219839	0.249	0.126	1.63627e-18	up
CM vs HM	4 - Mono	4a - CD14+ Mono	S100A4	7.97499e-23	0.154247	0.996	1	1.72882e-18	up
CM vs HM	4 - Mono	4a - CD14+ Mono	CAPZA2	8.20691e-23	0.284122	0.594	0.432	1.77909e-18	up
CM vs HM	4 - Mono	4a - CD14+ Mono	ZDHHC3	8.42388e-23	0.227195	0.214	0.101	1.82613e-18	up
CM vs HM	4 - Mono	4a - CD14+ Mono	LTB	9.44744e-23	0.20658	0.114	0.035	2.04802e-18	up
CM vs HM	4 - Mono	4a - CD14+ Mono	CAVIN3	1.26193e-22	0.164716	0.073	0.012	2.7356e-18	up
CM vs HM	4 - Mono	4a - CD14+ Mono	SLC25A37	1.71058e-22	0.338449	0.396	0.247	3.7082e-18	up
CM vs HM	4 - Mono	4a - CD14+ Mono	SLC11A1	1.76956e-22	0.365174	0.8	0.672	3.83605e-18	up
CM vs HM	4 - Mono	4a - CD14+ Mono	SOCS3	2.06459e-22	0.43843	0.436	0.298	4.47562e-18	up
CM vs HM	4 - Mono	4a - CD14+ Mono	PRDX5	2.146e-22	0.317834	0.725	0.597	4.65209e-18	up
CM vs HM	4 - Mono	4a - CD14+ Mono	LHPP	2.34823e-22	0.186971	0.133	0.047	5.0905e-18	up
CM vs HM	4 - Mono	4a - CD14+ Mono	HIGD2A	3.0352e-22	-0.254293	0.854	0.889	6.57971e-18	down
CM vs HM	4 - Mono	4a - CD14+ Mono	SLC25A11	3.54928e-22	0.213403	0.28	0.15	7.69413e-18	up
CM vs HM	4 - Mono	4a - CD14+ Mono	SYNGR1	3.62877e-22	0.191406	0.134	0.048	7.86645e-18	up
CM vs HM	4 - Mono	4a - CD14+ Mono	PPP2CA	3.64764e-22	0.272444	0.334	0.197	7.90735e-18	up
CM vs HM	4 - Mono	4a - CD14+ Mono	MICU2	3.80471e-22	0.214921	0.152	0.06	8.24785e-18	up
CM vs HM	4 - Mono	4a - CD14+ Mono	IDH2	3.82011e-22	0.217119	0.244	0.123	8.28123e-18	up
CM vs HM	4 - Mono	4a - CD14+ Mono	RAB24	4.01998e-22	0.265103	0.537	0.366	8.71451e-18	up
CM vs HM	4 - Mono	4a - CD14+ Mono	AC073332.1	4.1116e-22	0.140666	0.068	0.01	8.91313e-18	up
CM vs HM	4 - Mono	4a - CD14+ Mono	IL17RA	4.38866e-22	0.301908	0.623	0.466	9.51373e-18	up
CM vs HM	4 - Mono	4a - CD14+ Mono	HIST1H1E	4.5927e-22	0.279144	0.336	0.199	9.95606e-18	up
CM vs HM	4 - Mono	4a - CD14+ Mono	HMG20B	4.89382e-22	0.192992	0.193	0.086	1.06088e-17	up
CM vs HM	4 - Mono	4a - CD14+ Mono	SRD5A1	6.15943e-22	0.201338	0.135	0.049	1.33524e-17	up
CM vs HM	4 - Mono	4a - CD14+ Mono	HAGH	6.61904e-22	0.193076	0.165	0.069	1.43487e-17	up
CM vs HM	4 - Mono	4a - CD14+ Mono	CLPP	7.31703e-22	0.20929	0.21	0.1	1.58619e-17	up
CM vs HM	4 - Mono	4a - CD14+ Mono	UQCRB	7.94029e-22	-0.271308	0.821	0.849	1.7213e-17	down
CM vs HM	4 - Mono	4a - CD14+ Mono	PTPN11	8.07786e-22	0.199253	0.166	0.07	1.75112e-17	up
CM vs HM	4 - Mono	4a - CD14+ Mono	KIAA0100	8.14511e-22	0.220635	0.21	0.101	1.7657e-17	up
CM vs HM	4 - Mono	4a - CD14+ Mono	MTA2	9.1033e-22	0.19606	0.154	0.062	1.97341e-17	up
CM vs HM	4 - Mono	4a - CD14+ Mono	RPL36	9.56862e-22	-0.182134	0.967	0.979	2.07428e-17	down
CM vs HM	4 - Mono	4a - CD14+ Mono	HIST1H4C	1.05308e-21	0.223433	0.331	0.191	2.28287e-17	up
CM vs HM	4 - Mono	4a - CD14+ Mono	SBNO2	1.13278e-21	0.255236	0.175	0.077	2.45564e-17	up
CM vs HM	4 - Mono	4a - CD14+ Mono	RB1	1.24239e-21	0.227847	0.218	0.107	2.69326e-17	up
CM vs HM	4 - Mono	4a - CD14+ Mono	SGK1	1.26206e-21	0.366389	0.495	0.345	2.73589e-17	up
CM vs HM	4 - Mono	4a - CD14+ Mono	SNHG6	1.52881e-21	-0.368571	0.505	0.568	3.31416e-17	down
CM vs HM	4 - Mono	4a - CD14+ Mono	RPLP1	1.59441e-21	-0.132273	0.996	0.998	3.45637e-17	down
CM vs HM	4 - Mono	4a - CD14+ Mono	PIK3R1	1.61411e-21	0.213007	0.168	0.072	3.49907e-17	up
CM vs HM	4 - Mono	4a - CD14+ Mono	PCBP2	1.63656e-21	0.276048	0.804	0.713	3.54773e-17	up
CM vs HM	4 - Mono	4a - CD14+ Mono	DNAJC3	1.689e-21	0.279384	0.301	0.171	3.66141e-17	up
CM vs HM	4 - Mono	4a - CD14+ Mono	EMD	1.98025e-21	0.250726	0.308	0.173	4.29278e-17	up
CM vs HM	4 - Mono	4a - CD14+ Mono	SYNGR2	1.99294e-21	0.298082	0.545	0.389	4.32029e-17	up
CM vs HM	4 - Mono	4a - CD14+ Mono	ABCA7	2.00252e-21	0.208689	0.153	0.062	4.34107e-17	up
CM vs HM	4 - Mono	4a - CD14+ Mono	PLK3	2.19392e-21	0.299177	0.194	0.09	4.75598e-17	up
CM vs HM	4 - Mono	4a - CD14+ Mono	GSTP1	2.28344e-21	-0.216452	0.944	0.963	4.95004e-17	down
CM vs HM	4 - Mono	4a - CD14+ Mono	CTSH	2.36802e-21	0.286041	0.659	0.513	5.1334e-17	up
CM vs HM	4 - Mono	4a - CD14+ Mono	ACTN1	2.59533e-21	0.228469	0.398	0.246	5.62616e-17	up
CM vs HM	4 - Mono	4a - CD14+ Mono	MIS18BP1	2.61696e-21	0.290431	0.411	0.265	5.67304e-17	up
CM vs HM	4 - Mono	4a - CD14+ Mono	C19orf38	2.73336e-21	-0.364362	0.668	0.703	5.92538e-17	down
CM vs HM	4 - Mono	4a - CD14+ Mono	CTSD	2.79498e-21	0.263212	0.933	0.896	6.05895e-17	up
CM vs HM	4 - Mono	4a - CD14+ Mono	IRAK3	3.21755e-21	0.303562	0.421	0.27	6.97501e-17	up
CM vs HM	4 - Mono	4a - CD14+ Mono	CCR1	3.90152e-21	0.272781	0.334	0.2	8.45772e-17	up
CM vs HM	4 - Mono	4a - CD14+ Mono	ECE1	3.91097e-21	0.268036	0.226	0.115	8.4782e-17	up
CM vs HM	4 - Mono	4a - CD14+ Mono	HTATIP2	4.48169e-21	0.218638	0.23	0.116	9.71541e-17	up
CM vs HM	4 - Mono	4a - CD14+ Mono	MRPL12	4.9971e-21	0.214415	0.215	0.106	1.08327e-16	up
CM vs HM	4 - Mono	4a - CD14+ Mono	RPL37	5.68005e-21	-0.164294	0.985	0.992	1.23132e-16	down
CM vs HM	4 - Mono	4a - CD14+ Mono	CLEC11A	5.83166e-21	0.182287	0.095	0.026	1.26419e-16	up
CM vs HM	4 - Mono	4a - CD14+ Mono	TMEM123	5.90626e-21	0.287189	0.405	0.261	1.28036e-16	up
CM vs HM	4 - Mono	4a - CD14+ Mono	FAM49B	5.91778e-21	0.285492	0.469	0.312	1.28286e-16	up
CM vs HM	4 - Mono	4a - CD14+ Mono	HOOK3	6.02298e-21	0.286799	0.368	0.229	1.30566e-16	up
CM vs HM	4 - Mono	4a - CD14+ Mono	CAPN7	6.03857e-21	0.204496	0.148	0.06	1.30904e-16	up
CM vs HM	4 - Mono	4a - CD14+ Mono	EVI5	6.33019e-21	0.24425	0.259	0.14	1.37226e-16	up
CM vs HM	4 - Mono	4a - CD14+ Mono	ITGAM	6.52343e-21	0.313713	0.596	0.448	1.41415e-16	up
CM vs HM	4 - Mono	4a - CD14+ Mono	LMNB1	6.54426e-21	0.241901	0.205	0.1	1.41866e-16	up
CM vs HM	4 - Mono	4a - CD14+ Mono	SQSTM1	6.89676e-21	0.275604	0.611	0.452	1.49508e-16	up
CM vs HM	4 - Mono	4a - CD14+ Mono	CLEC12A	7.37745e-21	-0.345266	0.603	0.656	1.59928e-16	down
CM vs HM	4 - Mono	4a - CD14+ Mono	CLU	9.22646e-21	0.2506	0.271	0.149	2.00011e-16	up
CM vs HM	4 - Mono	4a - CD14+ Mono	NBEAL2	1.05563e-20	0.243727	0.233	0.121	2.2884e-16	up
CM vs HM	4 - Mono	4a - CD14+ Mono	TYROBP	1.05649e-20	-0.133443	0.996	0.998	2.29025e-16	down
CM vs HM	4 - Mono	4a - CD14+ Mono	HLA-DMB	1.12684e-20	-0.35263	0.364	0.459	2.44277e-16	down
CM vs HM	4 - Mono	4a - CD14+ Mono	GNPTG	1.13197e-20	0.206454	0.245	0.126	2.45388e-16	up
CM vs HM	4 - Mono	4a - CD14+ Mono	RAB31	1.14907e-20	0.303184	0.574	0.417	2.49096e-16	up
CM vs HM	4 - Mono	4a - CD14+ Mono	GIMAP7	1.45353e-20	0.321088	0.587	0.441	3.15096e-16	up
CM vs HM	4 - Mono	4a - CD14+ Mono	MXD1	1.92961e-20	0.280389	0.36	0.221	4.18301e-16	up
CM vs HM	4 - Mono	4a - CD14+ Mono	PHYKPL	1.96345e-20	0.245885	0.281	0.159	4.25638e-16	up
CM vs HM	4 - Mono	4a - CD14+ Mono	SLC25A24	1.99999e-20	0.203585	0.224	0.113	4.33557e-16	up
CM vs HM	4 - Mono	4a - CD14+ Mono	DPH1	2.07344e-20	0.176779	0.115	0.04	4.49479e-16	up
CM vs HM	4 - Mono	4a - CD14+ Mono	PGRMC1	2.32421e-20	0.18907	0.14	0.055	5.03843e-16	up
CM vs HM	4 - Mono	4a - CD14+ Mono	PLEKHG2	2.61128e-20	0.183123	0.121	0.042	5.66074e-16	up
CM vs HM	4 - Mono	4a - CD14+ Mono	ASPH	2.62611e-20	0.20043	0.127	0.047	5.69288e-16	up
CM vs HM	4 - Mono	4a - CD14+ Mono	GPAA1	2.8902e-20	0.216022	0.22	0.111	6.26539e-16	up
CM vs HM	4 - Mono	4a - CD14+ Mono	PLP2	3.25139e-20	-0.329131	0.765	0.797	7.04836e-16	down
CM vs HM	4 - Mono	4a - CD14+ Mono	POLR1D	3.28757e-20	-0.354214	0.538	0.595	7.12679e-16	down
CM vs HM	4 - Mono	4a - CD14+ Mono	MFSD1	3.29808e-20	0.250836	0.449	0.295	7.14958e-16	up
CM vs HM	4 - Mono	4a - CD14+ Mono	FCAR	4.23625e-20	0.222213	0.194	0.092	9.18334e-16	up
CM vs HM	4 - Mono	4a - CD14+ Mono	TNNT1	4.56161e-20	0.35698	0.202	0.103	9.88866e-16	up
CM vs HM	4 - Mono	4a - CD14+ Mono	STARD3NL	5.08648e-20	0.186517	0.19	0.089	1.10265e-15	up
CM vs HM	4 - Mono	4a - CD14+ Mono	RAB5IF	5.23364e-20	0.230182	0.392	0.242	1.13455e-15	up
CM vs HM	4 - Mono	4a - CD14+ Mono	CMAS	5.29219e-20	0.165638	0.138	0.054	1.14724e-15	up
CM vs HM	4 - Mono	4a - CD14+ Mono	LGALS12	6.66512e-20	0.152253	0.074	0.016	1.44486e-15	up
CM vs HM	4 - Mono	4a - CD14+ Mono	CHD1	7.28552e-20	0.295035	0.364	0.23	1.57936e-15	up
CM vs HM	4 - Mono	4a - CD14+ Mono	C12orf57	7.47346e-20	0.547655	0.445	0.311	1.6201e-15	up
CM vs HM	4 - Mono	4a - CD14+ Mono	EAF1	7.52989e-20	0.223134	0.189	0.09	1.63233e-15	up
CM vs HM	4 - Mono	4a - CD14+ Mono	CYBB	7.67114e-20	0.282309	0.852	0.768	1.66295e-15	up
CM vs HM	4 - Mono	4a - CD14+ Mono	USP48	9.11259e-20	0.22899	0.246	0.133	1.97543e-15	up
CM vs HM	4 - Mono	4a - CD14+ Mono	DDX21	1.34015e-19	0.307201	0.612	0.464	2.90518e-15	up
CM vs HM	4 - Mono	4a - CD14+ Mono	MT1F	1.37401e-19	0.217666	0.187	0.089	2.97858e-15	up
CM vs HM	4 - Mono	4a - CD14+ Mono	PPP1CC	1.39173e-19	0.262585	0.385	0.245	3.01699e-15	up
CM vs HM	4 - Mono	4a - CD14+ Mono	HOOK2	1.46132e-19	0.192263	0.134	0.053	3.16785e-15	up
CM vs HM	4 - Mono	4a - CD14+ Mono	UBE3A	1.48301e-19	0.245756	0.23	0.121	3.21486e-15	up
CM vs HM	4 - Mono	4a - CD14+ Mono	NDUFB1	1.49147e-19	0.284201	0.527	0.372	3.23322e-15	up
CM vs HM	4 - Mono	4a - CD14+ Mono	CBX3	1.57915e-19	0.262841	0.432	0.287	3.42328e-15	up
CM vs HM	4 - Mono	4a - CD14+ Mono	PDIA6	1.63992e-19	0.216719	0.309	0.179	3.55502e-15	up
CM vs HM	4 - Mono	4a - CD14+ Mono	NXT1	1.65102e-19	0.187151	0.165	0.074	3.57908e-15	up
CM vs HM	4 - Mono	4a - CD14+ Mono	MCUB	1.84937e-19	0.201504	0.227	0.119	4.00906e-15	up
CM vs HM	4 - Mono	4a - CD14+ Mono	GNG5	2.32288e-19	0.219557	0.873	0.781	5.03555e-15	up
CM vs HM	4 - Mono	4a - CD14+ Mono	RIN3	2.48998e-19	0.235016	0.423	0.274	5.39778e-15	up
CM vs HM	4 - Mono	4a - CD14+ Mono	CDC42EP1	2.49704e-19	0.152364	0.082	0.021	5.41309e-15	up
CM vs HM	4 - Mono	4a - CD14+ Mono	TMEM191C	2.9859e-19	0.156623	0.1	0.032	6.47283e-15	up
CM vs HM	4 - Mono	4a - CD14+ Mono	PIM1	3.00261e-19	0.235063	0.172	0.08	6.50907e-15	up
CM vs HM	4 - Mono	4a - CD14+ Mono	USP15	3.3411e-19	0.311097	0.658	0.509	7.24284e-15	up
CM vs HM	4 - Mono	4a - CD14+ Mono	MT2A	3.43992e-19	-0.436079	0.419	0.504	7.45705e-15	down
CM vs HM	4 - Mono	4a - CD14+ Mono	ACTR2	3.48262e-19	0.265442	0.737	0.623	7.54963e-15	up
CM vs HM	4 - Mono	4a - CD14+ Mono	EHD1	3.57438e-19	0.246431	0.229	0.12	7.74855e-15	up
CM vs HM	4 - Mono	4a - CD14+ Mono	SRPK2	3.60738e-19	0.205918	0.269	0.151	7.82008e-15	up
CM vs HM	4 - Mono	4a - CD14+ Mono	BLVRB	3.60807e-19	0.240452	0.856	0.784	7.82158e-15	up
CM vs HM	4 - Mono	4a - CD14+ Mono	APAF1	3.88896e-19	0.249022	0.37	0.233	8.43049e-15	up
CM vs HM	4 - Mono	4a - CD14+ Mono	APLP2	4.20771e-19	0.249594	0.864	0.795	9.12147e-15	up
CM vs HM	4 - Mono	4a - CD14+ Mono	SHKBP1	5.03331e-19	0.241519	0.604	0.447	1.09112e-14	up
CM vs HM	4 - Mono	4a - CD14+ Mono	C3AR1	5.97067e-19	0.238273	0.197	0.099	1.29432e-14	up
CM vs HM	4 - Mono	4a - CD14+ Mono	MARCO	6.5854e-19	0.263813	0.28	0.164	1.42758e-14	up
CM vs HM	4 - Mono	4a - CD14+ Mono	SPG21	6.7128e-19	0.223732	0.44	0.284	1.4552e-14	up
CM vs HM	4 - Mono	4a - CD14+ Mono	CERT1	7.35493e-19	0.230628	0.343	0.211	1.5944e-14	up
CM vs HM	4 - Mono	4a - CD14+ Mono	ATP1B3	7.40675e-19	0.212453	0.259	0.143	1.60563e-14	up
CM vs HM	4 - Mono	4a - CD14+ Mono	NAMPT	7.48511e-19	0.367388	0.716	0.593	1.62262e-14	up
CM vs HM	4 - Mono	4a - CD14+ Mono	AC004687.1	7.50808e-19	-0.350512	0.274	0.367	1.6276e-14	down
CM vs HM	4 - Mono	4a - CD14+ Mono	MGRN1	8.25646e-19	0.21761	0.254	0.14	1.78984e-14	up
CM vs HM	4 - Mono	4a - CD14+ Mono	TOR2A	8.93791e-19	0.180917	0.181	0.087	1.93756e-14	up
CM vs HM	4 - Mono	4a - CD14+ Mono	DR1	9.75837e-19	0.195563	0.227	0.12	2.11542e-14	up
CM vs HM	4 - Mono	4a - CD14+ Mono	RPS29	1.06427e-18	-0.314996	0.754	0.77	2.30713e-14	down
CM vs HM	4 - Mono	4a - CD14+ Mono	TP53I13	1.14136e-18	0.121126	0.068	0.014	2.47424e-14	up
CM vs HM	4 - Mono	4a - CD14+ Mono	FAM118A	1.14207e-18	0.170139	0.167	0.077	2.47579e-14	up
CM vs HM	4 - Mono	4a - CD14+ Mono	C1QBP	1.14368e-18	0.187406	0.151	0.066	2.47926e-14	up
CM vs HM	4 - Mono	4a - CD14+ Mono	SMARCA5	1.15857e-18	0.259056	0.279	0.163	2.51155e-14	up
CM vs HM	4 - Mono	4a - CD14+ Mono	MTA1	1.23315e-18	0.138796	0.074	0.017	2.67322e-14	up
CM vs HM	4 - Mono	4a - CD14+ Mono	HMGN1	1.28418e-18	0.226657	0.254	0.142	2.78384e-14	up
CM vs HM	4 - Mono	4a - CD14+ Mono	RPL31	1.479e-18	-0.217455	0.906	0.934	3.20618e-14	down
CM vs HM	4 - Mono	4a - CD14+ Mono	BLOC1S6	1.60126e-18	0.232989	0.337	0.206	3.47121e-14	up
CM vs HM	4 - Mono	4a - CD14+ Mono	ZNF800	2.45966e-18	0.188057	0.193	0.096	5.33205e-14	up
CM vs HM	4 - Mono	4a - CD14+ Mono	EIF4A1	2.64987e-18	-0.210761	0.907	0.927	5.74438e-14	down
CM vs HM	4 - Mono	4a - CD14+ Mono	ARHGAP18	2.68614e-18	0.191461	0.17	0.08	5.823e-14	up
CM vs HM	4 - Mono	4a - CD14+ Mono	HLA-DRB5	2.7319e-18	-0.0863303	0.474	0.614	5.92221e-14	down
CM vs HM	4 - Mono	4a - CD14+ Mono	GRK2	2.82539e-18	0.236079	0.637	0.465	6.12487e-14	up
CM vs HM	4 - Mono	4a - CD14+ Mono	RELL1	2.89288e-18	0.223181	0.186	0.092	6.27118e-14	up
CM vs HM	4 - Mono	4a - CD14+ Mono	AC005082.1	3.00816e-18	0.115308	0.046	0.004	6.52108e-14	up
CM vs HM	4 - Mono	4a - CD14+ Mono	AFF4	3.15882e-18	0.235476	0.23	0.123	6.84769e-14	up
CM vs HM	4 - Mono	4a - CD14+ Mono	RPS9	3.38391e-18	-0.126324	0.995	0.994	7.33565e-14	down
CM vs HM	4 - Mono	4a - CD14+ Mono	RAP1A	3.77987e-18	0.231198	0.489	0.335	8.19401e-14	up
CM vs HM	4 - Mono	4a - CD14+ Mono	GAS5	3.78932e-18	-0.378717	0.494	0.551	8.21449e-14	down
CM vs HM	4 - Mono	4a - CD14+ Mono	MIER1	3.82968e-18	0.261253	0.332	0.205	8.30198e-14	up
CM vs HM	4 - Mono	4a - CD14+ Mono	B3GALT4	4.25141e-18	0.17887	0.13	0.053	9.2162e-14	up
CM vs HM	4 - Mono	4a - CD14+ Mono	ENO1	4.71697e-18	0.244202	0.86	0.794	1.02254e-13	up
CM vs HM	4 - Mono	4a - CD14+ Mono	MYO1G	5.75308e-18	0.241868	0.653	0.491	1.24715e-13	up
CM vs HM	4 - Mono	4a - CD14+ Mono	PAX8-AS1	5.86763e-18	0.166099	0.1	0.034	1.27198e-13	up
CM vs HM	4 - Mono	4a - CD14+ Mono	USP14	5.93288e-18	0.157881	0.134	0.055	1.28613e-13	up
CM vs HM	4 - Mono	4a - CD14+ Mono	MCOLN1	6.1026e-18	0.206214	0.2	0.102	1.32292e-13	up
CM vs HM	4 - Mono	4a - CD14+ Mono	TERF2IP	6.23035e-18	0.169825	0.252	0.14	1.35062e-13	up
CM vs HM	4 - Mono	4a - CD14+ Mono	ATG16L2	6.38615e-18	0.276577	0.504	0.353	1.38439e-13	up
CM vs HM	4 - Mono	4a - CD14+ Mono	FAM177A1	6.41529e-18	0.208229	0.212	0.112	1.39071e-13	up
CM vs HM	4 - Mono	4a - CD14+ Mono	UBTD1	7.10797e-18	0.16028	0.109	0.04	1.54087e-13	up
CM vs HM	4 - Mono	4a - CD14+ Mono	WASHC5	7.23639e-18	0.171209	0.139	0.06	1.56871e-13	up
CM vs HM	4 - Mono	4a - CD14+ Mono	PLEC	7.66717e-18	0.298682	0.574	0.423	1.66209e-13	up
CM vs HM	4 - Mono	4a - CD14+ Mono	ROCK1	8.24264e-18	0.262749	0.552	0.397	1.78684e-13	up
CM vs HM	4 - Mono	4a - CD14+ Mono	BZW1	8.34468e-18	0.263029	0.433	0.296	1.80896e-13	up
CM vs HM	4 - Mono	4a - CD14+ Mono	CRIP1	8.35585e-18	0.510151	0.792	0.73	1.81138e-13	up
CM vs HM	4 - Mono	4a - CD14+ Mono	LGALS9	8.39122e-18	-0.308019	0.63	0.678	1.81905e-13	down
CM vs HM	4 - Mono	4a - CD14+ Mono	RHOG	8.63449e-18	-0.256035	0.849	0.873	1.87178e-13	down
CM vs HM	4 - Mono	4a - CD14+ Mono	PNKP	8.66863e-18	0.199362	0.193	0.098	1.87919e-13	up
CM vs HM	4 - Mono	4a - CD14+ Mono	DEF6	8.86831e-18	0.219517	0.292	0.172	1.92247e-13	up
CM vs HM	4 - Mono	4a - CD14+ Mono	HSPA1A	8.96988e-18	0.238307	0.444	0.299	1.94449e-13	up
CM vs HM	4 - Mono	4a - CD14+ Mono	LBR	9.25784e-18	0.241977	0.346	0.216	2.00691e-13	up
CM vs HM	4 - Mono	4a - CD14+ Mono	YPEL2	9.93267e-18	0.192434	0.24	0.132	2.1532e-13	up
CM vs HM	4 - Mono	4a - CD14+ Mono	SQLE	9.94258e-18	0.184875	0.098	0.033	2.15535e-13	up
CM vs HM	4 - Mono	4a - CD14+ Mono	TXN	9.95607e-18	0.287042	0.675	0.534	2.15828e-13	up
CM vs HM	4 - Mono	4a - CD14+ Mono	GMIP	1.08865e-17	0.228311	0.337	0.21	2.35998e-13	up
CM vs HM	4 - Mono	4a - CD14+ Mono	AC004556.3	1.17487e-17	0.102512	0.042	0.002	2.54688e-13	up
CM vs HM	4 - Mono	4a - CD14+ Mono	GYPC	1.1973e-17	0.218626	0.224	0.122	2.59551e-13	up
CM vs HM	4 - Mono	4a - CD14+ Mono	RAB14	1.27971e-17	0.208237	0.382	0.244	2.77417e-13	up
CM vs HM	4 - Mono	4a - CD14+ Mono	CAMKK2	1.57763e-17	0.243732	0.293	0.177	3.41999e-13	up
CM vs HM	4 - Mono	4a - CD14+ Mono	SBDS	1.61074e-17	0.223621	0.246	0.138	3.49175e-13	up
CM vs HM	4 - Mono	4a - CD14+ Mono	VPS4B	1.90638e-17	0.222495	0.356	0.224	4.13266e-13	up
CM vs HM	4 - Mono	4a - CD14+ Mono	ZFP36L1	1.97224e-17	0.36782	0.727	0.629	4.27543e-13	up
CM vs HM	4 - Mono	4a - CD14+ Mono	FPR1	2.11425e-17	0.273035	0.792	0.681	4.58326e-13	up
CM vs HM	4 - Mono	4a - CD14+ Mono	ARIH2	2.14917e-17	0.210977	0.254	0.145	4.65898e-13	up
CM vs HM	4 - Mono	4a - CD14+ Mono	AURKAIP1	2.15432e-17	0.254468	0.572	0.416	4.67012e-13	up
CM vs HM	4 - Mono	4a - CD14+ Mono	RILP	2.52246e-17	0.14418	0.084	0.025	5.46818e-13	up
CM vs HM	4 - Mono	4a - CD14+ Mono	SLC25A36	2.58257e-17	0.200121	0.163	0.078	5.59849e-13	up
CM vs HM	4 - Mono	4a - CD14+ Mono	ARHGAP30	2.627e-17	0.259958	0.645	0.508	5.69481e-13	up
CM vs HM	4 - Mono	4a - CD14+ Mono	PROK2	2.81419e-17	0.159145	0.075	0.02	6.10061e-13	up
CM vs HM	4 - Mono	4a - CD14+ Mono	C4orf48	3.31597e-17	0.182544	0.091	0.03	7.18837e-13	up
CM vs HM	4 - Mono	4a - CD14+ Mono	AC015912.3	3.52381e-17	0.216856	0.197	0.103	7.63892e-13	up
CM vs HM	4 - Mono	4a - CD14+ Mono	PNRC1	3.57427e-17	0.267488	0.564	0.419	7.7483e-13	up
CM vs HM	4 - Mono	4a - CD14+ Mono	DNPH1	3.64005e-17	0.159755	0.178	0.087	7.89091e-13	up
CM vs HM	4 - Mono	4a - CD14+ Mono	BLOC1S1	3.76254e-17	0.254101	0.872	0.789	8.15643e-13	up
CM vs HM	4 - Mono	4a - CD14+ Mono	TALDO1	3.80336e-17	0.164202	0.94	0.911	8.24492e-13	up
CM vs HM	4 - Mono	4a - CD14+ Mono	PWWP2A	4.06359e-17	0.15298	0.116	0.045	8.80906e-13	up
CM vs HM	4 - Mono	4a - CD14+ Mono	C1orf162	4.34035e-17	-0.303299	0.798	0.821	9.409e-13	down
CM vs HM	4 - Mono	4a - CD14+ Mono	HIST2H2AC	4.58151e-17	0.152851	0.113	0.043	9.93179e-13	up
CM vs HM	4 - Mono	4a - CD14+ Mono	SNX10	4.63568e-17	0.223906	0.389	0.255	1.00492e-12	up
CM vs HM	4 - Mono	4a - CD14+ Mono	HLX	4.72786e-17	0.195049	0.186	0.094	1.02491e-12	up
CM vs HM	4 - Mono	4a - CD14+ Mono	DIAPH2	5.05373e-17	0.19489	0.199	0.104	1.09555e-12	up
CM vs HM	4 - Mono	4a - CD14+ Mono	CAMTA1	5.16926e-17	0.200525	0.309	0.188	1.12059e-12	up
CM vs HM	4 - Mono	4a - CD14+ Mono	UBE2G1	5.24004e-17	0.16948	0.141	0.062	1.13594e-12	up
CM vs HM	4 - Mono	4a - CD14+ Mono	PLSCR1	5.34339e-17	0.252546	0.487	0.344	1.15834e-12	up
CM vs HM	4 - Mono	4a - CD14+ Mono	CHTF8	5.75084e-17	0.135198	0.07	0.018	1.24667e-12	up
CM vs HM	4 - Mono	4a - CD14+ Mono	FAM110A	5.82034e-17	0.176064	0.206	0.109	1.26173e-12	up
CM vs HM	4 - Mono	4a - CD14+ Mono	GNLY	5.85714e-17	0.150746	0.067	0.016	1.26971e-12	up
CM vs HM	4 - Mono	4a - CD14+ Mono	ADAP2	5.87744e-17	0.248225	0.33	0.21	1.27411e-12	up
CM vs HM	4 - Mono	4a - CD14+ Mono	NBPF26	6.06059e-17	0.229339	0.597	0.445	1.31381e-12	up
CM vs HM	4 - Mono	4a - CD14+ Mono	MRPL4	6.43371e-17	0.188449	0.214	0.116	1.3947e-12	up
CM vs HM	4 - Mono	4a - CD14+ Mono	C5orf24	6.62687e-17	0.146385	0.142	0.063	1.43657e-12	up
CM vs HM	4 - Mono	4a - CD14+ Mono	SLC25A5	6.88985e-17	-0.306006	0.721	0.754	1.49358e-12	down
CM vs HM	4 - Mono	4a - CD14+ Mono	DGCR6L	7.2523e-17	0.185764	0.268	0.155	1.57215e-12	up
CM vs HM	4 - Mono	4a - CD14+ Mono	CFL1	7.52731e-17	0.145119	0.983	0.986	1.63177e-12	up
CM vs HM	4 - Mono	4a - CD14+ Mono	NDUFB10	8.12826e-17	0.240525	0.627	0.478	1.76204e-12	up
CM vs HM	4 - Mono	4a - CD14+ Mono	RAB32	8.65993e-17	0.179178	0.292	0.172	1.8773e-12	up
CM vs HM	4 - Mono	4a - CD14+ Mono	ERICH1	8.74582e-17	0.238401	0.471	0.323	1.89592e-12	up
CM vs HM	4 - Mono	4a - CD14+ Mono	RAB10	8.88127e-17	0.222544	0.539	0.393	1.92528e-12	up
CM vs HM	4 - Mono	4a - CD14+ Mono	SEPTIN7	9.00781e-17	0.23519	0.49	0.347	1.95271e-12	up
CM vs HM	4 - Mono	4a - CD14+ Mono	ZNF428	1.00289e-16	0.181211	0.188	0.096	2.17406e-12	up
CM vs HM	4 - Mono	4a - CD14+ Mono	PGAM1	1.07304e-16	0.2424	0.761	0.654	2.32613e-12	up
CM vs HM	4 - Mono	4a - CD14+ Mono	TBCB	1.08407e-16	0.18448	0.441	0.29	2.35005e-12	up
CM vs HM	4 - Mono	4a - CD14+ Mono	SPATA6	1.26911e-16	0.145495	0.085	0.027	2.75117e-12	up
CM vs HM	4 - Mono	4a - CD14+ Mono	CHKB	1.27354e-16	0.206615	0.241	0.136	2.76079e-12	up
CM vs HM	4 - Mono	4a - CD14+ Mono	TOX4	1.30943e-16	0.233998	0.355	0.23	2.83858e-12	up
CM vs HM	4 - Mono	4a - CD14+ Mono	ARL8B	1.68441e-16	0.233911	0.325	0.207	3.65146e-12	up
CM vs HM	4 - Mono	4a - CD14+ Mono	PGS1	1.74892e-16	0.176636	0.175	0.087	3.7913e-12	up
CM vs HM	4 - Mono	4a - CD14+ Mono	PTAFR	1.81745e-16	0.263984	0.519	0.375	3.93987e-12	up
CM vs HM	4 - Mono	4a - CD14+ Mono	RAB4A	1.85056e-16	0.166011	0.163	0.079	4.01165e-12	up
CM vs HM	4 - Mono	4a - CD14+ Mono	UROS	1.98155e-16	0.158499	0.112	0.044	4.29561e-12	up
CM vs HM	4 - Mono	4a - CD14+ Mono	SKAP2	2.05431e-16	0.230087	0.495	0.354	4.45333e-12	up
CM vs HM	4 - Mono	4a - CD14+ Mono	SMIM15	2.18189e-16	0.222322	0.202	0.109	4.72991e-12	up
CM vs HM	4 - Mono	4a - CD14+ Mono	PTPN1	2.2458e-16	0.205217	0.276	0.167	4.86845e-12	up
CM vs HM	4 - Mono	4a - CD14+ Mono	CLASRP	2.26515e-16	0.197873	0.193	0.101	4.9104e-12	up
CM vs HM	4 - Mono	4a - CD14+ Mono	EEA1	2.4118e-16	0.182411	0.226	0.125	5.2283e-12	up
CM vs HM	4 - Mono	4a - CD14+ Mono	IL6R	2.57262e-16	0.238333	0.383	0.251	5.57692e-12	up
CM vs HM	4 - Mono	4a - CD14+ Mono	COMMD8	3.39077e-16	0.173957	0.311	0.19	7.35052e-12	up
CM vs HM	4 - Mono	4a - CD14+ Mono	FP671120.6	3.50577e-16	-0.120928	0.008	0.043	7.5998e-12	down
CM vs HM	4 - Mono	4a - CD14+ Mono	MAPKAPK3	3.53766e-16	0.222321	0.45	0.314	7.66894e-12	up
CM vs HM	4 - Mono	4a - CD14+ Mono	ELANE	3.64532e-16	0.120732	0.053	0.009	7.90233e-12	up
CM vs HM	4 - Mono	4a - CD14+ Mono	APP	3.97862e-16	0.220544	0.283	0.172	8.62484e-12	up
CM vs HM	4 - Mono	4a - CD14+ Mono	SHOC2	4.24582e-16	0.219779	0.362	0.235	9.20408e-12	up
CM vs HM	4 - Mono	4a - CD14+ Mono	TNFRSF1A	5.07141e-16	0.191378	0.461	0.318	1.09938e-11	up
CM vs HM	4 - Mono	4a - CD14+ Mono	EGR2	5.20377e-16	0.147514	0.067	0.017	1.12807e-11	up
CM vs HM	4 - Mono	4a - CD14+ Mono	RGCC	5.36335e-16	0.258789	0.073	0.021	1.16267e-11	up
CM vs HM	4 - Mono	4a - CD14+ Mono	TDG	5.4691e-16	0.195798	0.265	0.157	1.18559e-11	up
CM vs HM	4 - Mono	4a - CD14+ Mono	RB1CC1	6.72926e-16	0.209879	0.316	0.198	1.45877e-11	up
CM vs HM	4 - Mono	4a - CD14+ Mono	IFNAR1	6.83327e-16	0.211375	0.345	0.222	1.48132e-11	up
CM vs HM	4 - Mono	4a - CD14+ Mono	PELI1	6.87431e-16	0.214831	0.219	0.122	1.49021e-11	up
CM vs HM	4 - Mono	4a - CD14+ Mono	PPP4R2	7.34172e-16	0.165877	0.22	0.121	1.59154e-11	up
CM vs HM	4 - Mono	4a - CD14+ Mono	HDAC4	7.55407e-16	0.192972	0.182	0.095	1.63757e-11	up
CM vs HM	4 - Mono	4a - CD14+ Mono	RASGEF1B	7.76378e-16	0.215771	0.131	0.059	1.68303e-11	up
CM vs HM	4 - Mono	4a - CD14+ Mono	CARD19	7.92876e-16	0.193633	0.309	0.192	1.7188e-11	up
CM vs HM	4 - Mono	4a - CD14+ Mono	CYFIP1	8.6269e-16	0.20581	0.349	0.226	1.87014e-11	up
CM vs HM	4 - Mono	4a - CD14+ Mono	DALRD3	9.64701e-16	0.138544	0.101	0.038	2.09128e-11	up
CM vs HM	4 - Mono	4a - CD14+ Mono	C18orf32	1.08269e-15	0.192121	0.342	0.219	2.34706e-11	up
CM vs HM	4 - Mono	4a - CD14+ Mono	SPPL2A	1.15504e-15	0.167244	0.182	0.095	2.50389e-11	up
CM vs HM	4 - Mono	4a - CD14+ Mono	AQP9	1.17541e-15	0.217905	0.259	0.153	2.54806e-11	up
CM vs HM	4 - Mono	4a - CD14+ Mono	PSMB9	1.21461e-15	-0.305984	0.654	0.683	2.63302e-11	down
CM vs HM	4 - Mono	4a - CD14+ Mono	TAOK3	1.34911e-15	0.20861	0.434	0.298	2.9246e-11	up
CM vs HM	4 - Mono	4a - CD14+ Mono	RPIA	1.39271e-15	0.121059	0.129	0.057	3.01913e-11	up
CM vs HM	4 - Mono	4a - CD14+ Mono	SYTL1	1.39392e-15	0.183469	0.161	0.08	3.02175e-11	up
CM vs HM	4 - Mono	4a - CD14+ Mono	QSOX1	1.41009e-15	0.205609	0.34	0.216	3.05679e-11	up
CM vs HM	4 - Mono	4a - CD14+ Mono	C1D	1.50957e-15	0.187025	0.27	0.163	3.27245e-11	up
CM vs HM	4 - Mono	4a - CD14+ Mono	ITSN2	1.53494e-15	0.228631	0.342	0.221	3.32744e-11	up
CM vs HM	4 - Mono	4a - CD14+ Mono	CHRAC1	1.64765e-15	0.176791	0.175	0.09	3.57178e-11	up
CM vs HM	4 - Mono	4a - CD14+ Mono	EREG	1.68439e-15	0.293303	0.113	0.048	3.65143e-11	up
CM vs HM	4 - Mono	4a - CD14+ Mono	ANTXR2	1.69077e-15	0.157858	0.171	0.086	3.66525e-11	up
CM vs HM	4 - Mono	4a - CD14+ Mono	GABARAPL2	1.8859e-15	0.229455	0.58	0.442	4.08825e-11	up
CM vs HM	4 - Mono	4a - CD14+ Mono	EIF3E	2.08462e-15	-0.297096	0.662	0.693	4.51904e-11	down
CM vs HM	4 - Mono	4a - CD14+ Mono	SMAGP	2.15604e-15	0.117994	0.075	0.022	4.67387e-11	up
CM vs HM	4 - Mono	4a - CD14+ Mono	RRP12	2.28999e-15	0.28736	0.41	0.285	4.96423e-11	up
CM vs HM	4 - Mono	4a - CD14+ Mono	OCEL1	2.32409e-15	0.141136	0.199	0.107	5.03816e-11	up
CM vs HM	4 - Mono	4a - CD14+ Mono	HECTD1	2.35066e-15	0.203038	0.25	0.148	5.09577e-11	up
CM vs HM	4 - Mono	4a - CD14+ Mono	RTF1	2.37833e-15	0.207183	0.196	0.108	5.15573e-11	up
CM vs HM	4 - Mono	4a - CD14+ Mono	ARHGAP45	2.60505e-15	0.238283	0.489	0.356	5.64723e-11	up
CM vs HM	4 - Mono	4a - CD14+ Mono	GRN	2.71543e-15	-0.192938	0.903	0.915	5.88651e-11	down
CM vs HM	4 - Mono	4a - CD14+ Mono	AKIRIN1	2.85787e-15	0.161932	0.171	0.087	6.19529e-11	up
CM vs HM	4 - Mono	4a - CD14+ Mono	EIF3L	3.22818e-15	-0.271061	0.672	0.698	6.99805e-11	down
CM vs HM	4 - Mono	4a - CD14+ Mono	EIF4EBP2	3.2565e-15	0.200133	0.328	0.209	7.05943e-11	up
CM vs HM	4 - Mono	4a - CD14+ Mono	LINC02256	3.33319e-15	0.177135	0.226	0.128	7.22569e-11	up
CM vs HM	4 - Mono	4a - CD14+ Mono	PDCD10	3.33455e-15	0.212063	0.296	0.186	7.22864e-11	up
CM vs HM	4 - Mono	4a - CD14+ Mono	RIPOR2	3.83932e-15	0.265966	0.671	0.545	8.32288e-11	up
CM vs HM	4 - Mono	4a - CD14+ Mono	HOTAIRM1	3.93754e-15	0.174794	0.293	0.178	8.5358e-11	up
CM vs HM	4 - Mono	4a - CD14+ Mono	PTGS2	4.17241e-15	0.217612	0.131	0.061	9.04494e-11	up
CM vs HM	4 - Mono	4a - CD14+ Mono	ANXA6	4.17859e-15	0.240573	0.434	0.303	9.05835e-11	up
CM vs HM	4 - Mono	4a - CD14+ Mono	GNG11	4.19552e-15	0.190832	0.117	0.05	9.09504e-11	up
CM vs HM	4 - Mono	4a - CD14+ Mono	HEXB	4.4813e-15	0.19529	0.338	0.217	9.71456e-11	up
CM vs HM	4 - Mono	4a - CD14+ Mono	FNBP4	4.62034e-15	0.195812	0.257	0.154	1.0016e-10	up
CM vs HM	4 - Mono	4a - CD14+ Mono	OTUD1	4.68423e-15	0.201018	0.185	0.1	1.01545e-10	up
CM vs HM	4 - Mono	4a - CD14+ Mono	GLRX2	4.79794e-15	0.132833	0.105	0.041	1.0401e-10	up
CM vs HM	4 - Mono	4a - CD14+ Mono	SIGIRR	5.03032e-15	0.201747	0.383	0.252	1.09047e-10	up
CM vs HM	4 - Mono	4a - CD14+ Mono	DPH3	5.12501e-15	0.208696	0.271	0.165	1.111e-10	up
CM vs HM	4 - Mono	4a - CD14+ Mono	DESI1	5.14947e-15	0.174456	0.177	0.092	1.1163e-10	up
CM vs HM	4 - Mono	4a - CD14+ Mono	PRKAR2A	5.17796e-15	0.168265	0.237	0.138	1.12248e-10	up
CM vs HM	4 - Mono	4a - CD14+ Mono	CARD9	5.22297e-15	0.179825	0.277	0.168	1.13224e-10	up
CM vs HM	4 - Mono	4a - CD14+ Mono	ZNF414	5.32693e-15	0.111652	0.051	0.01	1.15477e-10	up
CM vs HM	4 - Mono	4a - CD14+ Mono	TMEM87B	5.46222e-15	0.148049	0.125	0.056	1.1841e-10	up
CM vs HM	4 - Mono	4a - CD14+ Mono	ZC3H6	5.88595e-15	0.125052	0.104	0.041	1.27596e-10	up
CM vs HM	4 - Mono	4a - CD14+ Mono	IVNS1ABP	6.56359e-15	0.240257	0.305	0.193	1.42286e-10	up
CM vs HM	4 - Mono	4a - CD14+ Mono	MEGF9	6.60077e-15	0.192474	0.469	0.331	1.43092e-10	up
CM vs HM	4 - Mono	4a - CD14+ Mono	HRH2	6.75237e-15	0.266625	0.508	0.376	1.46378e-10	up
CM vs HM	4 - Mono	4a - CD14+ Mono	KRAS	6.86079e-15	0.188955	0.217	0.123	1.48728e-10	up
CM vs HM	4 - Mono	4a - CD14+ Mono	PLAC8	6.99313e-15	0.360533	0.549	0.44	1.51597e-10	up
CM vs HM	4 - Mono	4a - CD14+ Mono	PLA2G7	8.01152e-15	0.13018	0.1	0.04	1.73674e-10	up
CM vs HM	4 - Mono	4a - CD14+ Mono	CCDC107	8.06635e-15	0.133861	0.179	0.093	1.74862e-10	up
CM vs HM	4 - Mono	4a - CD14+ Mono	GAS7	8.13442e-15	0.219872	0.516	0.375	1.76338e-10	up
CM vs HM	4 - Mono	4a - CD14+ Mono	JOSD2	8.34472e-15	0.205623	0.413	0.284	1.80897e-10	up
CM vs HM	4 - Mono	4a - CD14+ Mono	SIK1B	8.62515e-15	-0.102506	0.009	0.044	1.86976e-10	down
CM vs HM	4 - Mono	4a - CD14+ Mono	LCP1	8.81246e-15	0.168573	0.93	0.888	1.91037e-10	up
CM vs HM	4 - Mono	4a - CD14+ Mono	DUSP1	9.36906e-15	0.234853	0.92	0.896	2.03102e-10	up
CM vs HM	4 - Mono	4a - CD14+ Mono	PRKDC	9.46113e-15	0.175168	0.254	0.152	2.05098e-10	up
CM vs HM	4 - Mono	4a - CD14+ Mono	ATP5F1E	9.54431e-15	0.126884	0.985	0.987	2.06902e-10	up
CM vs HM	4 - Mono	4a - CD14+ Mono	DBNDD2	9.65414e-15	0.107973	0.102	0.04	2.09282e-10	up
CM vs HM	4 - Mono	4a - CD14+ Mono	TAX1BP1	9.83064e-15	0.244075	0.555	0.418	2.13109e-10	up
CM vs HM	4 - Mono	4a - CD14+ Mono	CASP4	1.02275e-14	-0.352678	0.459	0.517	2.21712e-10	down
CM vs HM	4 - Mono	4a - CD14+ Mono	C6orf120	1.02858e-14	0.147472	0.117	0.051	2.22975e-10	up
CM vs HM	4 - Mono	4a - CD14+ Mono	MBNL1	1.06402e-14	0.233481	0.677	0.55	2.30658e-10	up
CM vs HM	4 - Mono	4a - CD14+ Mono	ARHGEF1	1.0735e-14	0.228284	0.523	0.384	2.32713e-10	up
CM vs HM	4 - Mono	4a - CD14+ Mono	AC009951.6	1.09375e-14	0.0994869	0.059	0.014	2.37103e-10	up
CM vs HM	4 - Mono	4a - CD14+ Mono	SLC7A7	1.17027e-14	-0.282753	0.675	0.709	2.53692e-10	down
CM vs HM	4 - Mono	4a - CD14+ Mono	MOSPD2	1.23889e-14	0.177276	0.206	0.117	2.68566e-10	up
CM vs HM	4 - Mono	4a - CD14+ Mono	RIOK3	1.26339e-14	0.210366	0.442	0.308	2.73877e-10	up
CM vs HM	4 - Mono	4a - CD14+ Mono	MAP3K11	1.28042e-14	0.159505	0.365	0.239	2.7757e-10	up
CM vs HM	4 - Mono	4a - CD14+ Mono	RIN1	1.32775e-14	0.153709	0.111	0.047	2.87829e-10	up
CM vs HM	4 - Mono	4a - CD14+ Mono	PCBD1	1.34335e-14	0.145832	0.199	0.11	2.91211e-10	up
CM vs HM	4 - Mono	4a - CD14+ Mono	C1orf122	1.34675e-14	0.122954	0.067	0.019	2.91949e-10	up
CM vs HM	4 - Mono	4a - CD14+ Mono	CYTH2	1.52021e-14	0.129827	0.137	0.064	3.29551e-10	up
CM vs HM	4 - Mono	4a - CD14+ Mono	CFP	1.53468e-14	-0.248572	0.791	0.808	3.32688e-10	down
CM vs HM	4 - Mono	4a - CD14+ Mono	FP236383.4	1.56238e-14	-0.214875	0.029	0.078	3.38692e-10	down
CM vs HM	4 - Mono	4a - CD14+ Mono	DOCK8	1.59657e-14	0.233453	0.648	0.52	3.46103e-10	up
CM vs HM	4 - Mono	4a - CD14+ Mono	ACSS2	1.60242e-14	0.158076	0.159	0.081	3.47374e-10	up
CM vs HM	4 - Mono	4a - CD14+ Mono	SH3BP1	1.63031e-14	0.169172	0.332	0.213	3.53419e-10	up
CM vs HM	4 - Mono	4a - CD14+ Mono	CCPG1	1.63967e-14	0.2019	0.316	0.204	3.55449e-10	up
CM vs HM	4 - Mono	4a - CD14+ Mono	CACYBP	1.64144e-14	0.182574	0.254	0.154	3.55831e-10	up
CM vs HM	4 - Mono	4a - CD14+ Mono	NPEPPS	1.67612e-14	0.198222	0.311	0.197	3.63348e-10	up
CM vs HM	4 - Mono	4a - CD14+ Mono	LINC00937	1.68236e-14	0.183106	0.251	0.15	3.64702e-10	up
CM vs HM	4 - Mono	4a - CD14+ Mono	TXNRD1	1.69329e-14	0.1656	0.215	0.121	3.67071e-10	up
CM vs HM	4 - Mono	4a - CD14+ Mono	ARHGAP4	1.73238e-14	0.243992	0.534	0.396	3.75546e-10	up
CM vs HM	4 - Mono	4a - CD14+ Mono	KTN1	1.88056e-14	0.198124	0.296	0.186	4.07668e-10	up
CM vs HM	4 - Mono	4a - CD14+ Mono	USF2	1.92101e-14	0.189189	0.301	0.19	4.16437e-10	up
CM vs HM	4 - Mono	4a - CD14+ Mono	C11orf58	2.13483e-14	0.237536	0.571	0.433	4.62788e-10	up
CM vs HM	4 - Mono	4a - CD14+ Mono	SERPINB9	2.19735e-14	0.166915	0.221	0.126	4.76342e-10	up
CM vs HM	4 - Mono	4a - CD14+ Mono	TUBB	2.19957e-14	-0.340531	0.421	0.476	4.76822e-10	down
CM vs HM	4 - Mono	4a - CD14+ Mono	CXCR4	2.23557e-14	-0.227015	0.105	0.177	4.84626e-10	down
CM vs HM	4 - Mono	4a - CD14+ Mono	EHD4	2.38721e-14	0.165268	0.182	0.099	5.175e-10	up
CM vs HM	4 - Mono	4a - CD14+ Mono	NCOR1	2.64269e-14	0.208484	0.421	0.294	5.72883e-10	up
CM vs HM	4 - Mono	4a - CD14+ Mono	NDUFA6	2.69309e-14	0.232082	0.532	0.403	5.83809e-10	up
CM vs HM	4 - Mono	4a - CD14+ Mono	OXLD1	2.71213e-14	0.164039	0.171	0.091	5.87935e-10	up
CM vs HM	4 - Mono	4a - CD14+ Mono	RPS6KA4	2.73353e-14	0.173114	0.343	0.224	5.92576e-10	up
CM vs HM	4 - Mono	4a - CD14+ Mono	CLEC2B	2.81195e-14	-0.281869	0.261	0.338	6.09575e-10	down
CM vs HM	4 - Mono	4a - CD14+ Mono	ABHD17A	2.81408e-14	0.133716	0.082	0.029	6.10036e-10	up
CM vs HM	4 - Mono	4a - CD14+ Mono	WASHC2C	2.89954e-14	0.199709	0.3	0.192	6.28563e-10	up
CM vs HM	4 - Mono	4a - CD14+ Mono	RPS2	2.90405e-14	0.159138	0.906	0.86	6.2954e-10	up
CM vs HM	4 - Mono	4a - CD14+ Mono	PPA1	3.04256e-14	-0.319826	0.256	0.327	6.59566e-10	down
CM vs HM	4 - Mono	4a - CD14+ Mono	NUP214	3.16398e-14	-0.270215	0.716	0.739	6.85887e-10	down
CM vs HM	4 - Mono	4a - CD14+ Mono	ZNF511	3.23978e-14	0.173319	0.113	0.049	7.02319e-10	up
CM vs HM	4 - Mono	4a - CD14+ Mono	APOBEC3A	3.29929e-14	0.208612	0.434	0.304	7.15219e-10	up
CM vs HM	4 - Mono	4a - CD14+ Mono	PPP1CB	3.39808e-14	0.210516	0.401	0.277	7.36636e-10	up
CM vs HM	4 - Mono	4a - CD14+ Mono	UQCR11	3.73094e-14	0.180748	0.916	0.877	8.08794e-10	up
CM vs HM	4 - Mono	4a - CD14+ Mono	NPTN	3.8834e-14	0.183362	0.221	0.129	8.41843e-10	up
CM vs HM	4 - Mono	4a - CD14+ Mono	SNHG1	3.96634e-14	-0.235848	0.077	0.141	8.59823e-10	down
CM vs HM	4 - Mono	4a - CD14+ Mono	SIRPB1	4.00303e-14	-0.304888	0.318	0.39	8.67776e-10	down
CM vs HM	4 - Mono	4a - CD14+ Mono	FAM20A	4.01955e-14	0.15812	0.101	0.041	8.71359e-10	up
CM vs HM	4 - Mono	4a - CD14+ Mono	SNX3	4.28509e-14	0.16403	0.358	0.236	9.28923e-10	up
CM vs HM	4 - Mono	4a - CD14+ Mono	GCA	4.33625e-14	0.232326	0.731	0.622	9.40012e-10	up
CM vs HM	4 - Mono	4a - CD14+ Mono	PPP1R15B	4.71352e-14	0.186621	0.26	0.161	1.0218e-09	up
CM vs HM	4 - Mono	4a - CD14+ Mono	NOTCH2NLA	4.79589e-14	0.155724	0.181	0.098	1.03965e-09	up
CM vs HM	4 - Mono	4a - CD14+ Mono	SETD3	4.95771e-14	0.168755	0.183	0.099	1.07473e-09	up
CM vs HM	4 - Mono	4a - CD14+ Mono	NSMCE4A	5.03811e-14	0.125395	0.101	0.041	1.09216e-09	up
CM vs HM	4 - Mono	4a - CD14+ Mono	AKAP8L	5.10113e-14	0.164927	0.108	0.047	1.10582e-09	up
CM vs HM	4 - Mono	4a - CD14+ Mono	RESF1	5.20372e-14	0.221654	0.383	0.263	1.12806e-09	up
CM vs HM	4 - Mono	4a - CD14+ Mono	MYH9	5.27676e-14	0.251384	0.758	0.672	1.1439e-09	up
CM vs HM	4 - Mono	4a - CD14+ Mono	TLR4	5.2953e-14	0.213138	0.437	0.308	1.14792e-09	up
CM vs HM	4 - Mono	4a - CD14+ Mono	ABHD8	5.34254e-14	0.0978216	0.054	0.012	1.15816e-09	up
CM vs HM	4 - Mono	4a - CD14+ Mono	PARP1	5.38748e-14	0.162252	0.198	0.112	1.1679e-09	up
CM vs HM	4 - Mono	4a - CD14+ Mono	CHCHD2	5.41804e-14	-0.194586	0.867	0.882	1.17452e-09	down
CM vs HM	4 - Mono	4a - CD14+ Mono	ZDHHC20	5.60512e-14	0.188187	0.244	0.148	1.21508e-09	up
CM vs HM	4 - Mono	4a - CD14+ Mono	USP3	5.68649e-14	0.24312	0.547	0.416	1.23272e-09	up
CM vs HM	4 - Mono	4a - CD14+ Mono	PSMA7	5.79248e-14	0.220388	0.791	0.7	1.25569e-09	up
CM vs HM	4 - Mono	4a - CD14+ Mono	PHLDA2	5.801e-14	0.124472	0.06	0.016	1.25754e-09	up
CM vs HM	4 - Mono	4a - CD14+ Mono	RPL27	5.80339e-14	-0.19975	0.935	0.935	1.25806e-09	down
CM vs HM	4 - Mono	4a - CD14+ Mono	PSMD2	6.0022e-14	0.206784	0.297	0.189	1.30116e-09	up
CM vs HM	4 - Mono	4a - CD14+ Mono	H2AFV	6.21726e-14	0.176242	0.236	0.139	1.34778e-09	up
CM vs HM	4 - Mono	4a - CD14+ Mono	TRIM4	6.26738e-14	0.122102	0.128	0.06	1.35864e-09	up
CM vs HM	4 - Mono	4a - CD14+ Mono	BACH1	6.41145e-14	0.228314	0.541	0.415	1.38987e-09	up
CM vs HM	4 - Mono	4a - CD14+ Mono	FXN	6.49254e-14	0.113712	0.078	0.027	1.40745e-09	up
CM vs HM	4 - Mono	4a - CD14+ Mono	MYCBP2	6.57001e-14	0.205433	0.422	0.296	1.42425e-09	up
CM vs HM	4 - Mono	4a - CD14+ Mono	NORAD	6.86616e-14	0.196407	0.413	0.286	1.48845e-09	up
CM vs HM	4 - Mono	4a - CD14+ Mono	PPP4C	7.28143e-14	0.192021	0.444	0.311	1.57847e-09	up
CM vs HM	4 - Mono	4a - CD14+ Mono	COMT	7.45713e-14	0.215208	0.603	0.472	1.61656e-09	up
CM vs HM	4 - Mono	4a - CD14+ Mono	MAP3K4	7.57398e-14	0.122524	0.116	0.052	1.64189e-09	up
CM vs HM	4 - Mono	4a - CD14+ Mono	CYP51A1	7.57934e-14	0.149622	0.11	0.048	1.64305e-09	up
CM vs HM	4 - Mono	4a - CD14+ Mono	TUBB1	7.84525e-14	0.188892	0.113	0.05	1.70069e-09	up
CM vs HM	4 - Mono	4a - CD14+ Mono	LUC7L2	7.93641e-14	0.183792	0.274	0.169	1.72046e-09	up
CM vs HM	4 - Mono	4a - CD14+ Mono	BICD2	7.97971e-14	0.177867	0.265	0.163	1.72984e-09	up
CM vs HM	4 - Mono	4a - CD14+ Mono	ITGB1	8.36734e-14	0.187305	0.333	0.219	1.81387e-09	up
CM vs HM	4 - Mono	4a - CD14+ Mono	RNF10	8.90483e-14	0.174105	0.246	0.149	1.93039e-09	up
CM vs HM	4 - Mono	4a - CD14+ Mono	LTBP4	9.36814e-14	0.0957912	0.057	0.015	2.03082e-09	up
CM vs HM	4 - Mono	4a - CD14+ Mono	H2AFY	9.62953e-14	0.212587	0.642	0.516	2.08749e-09	up
CM vs HM	4 - Mono	4a - CD14+ Mono	KLHL18	9.78788e-14	0.191809	0.213	0.123	2.12182e-09	up
CM vs HM	4 - Mono	4a - CD14+ Mono	CD68	9.97988e-14	-0.27933	0.852	0.863	2.16344e-09	down
CM vs HM	4 - Mono	4a - CD14+ Mono	EZR	1.0562e-13	0.224702	0.38	0.263	2.28963e-09	up
CM vs HM	4 - Mono	4a - CD14+ Mono	RBL2	1.17606e-13	0.170616	0.255	0.157	2.54946e-09	up
CM vs HM	4 - Mono	4a - CD14+ Mono	MCAT	1.17811e-13	0.0939372	0.049	0.01	2.5539e-09	up
CM vs HM	4 - Mono	4a - CD14+ Mono	TBC1D17	1.22316e-13	0.119933	0.087	0.033	2.65156e-09	up
CM vs HM	4 - Mono	4a - CD14+ Mono	NACC2	1.26256e-13	0.211174	0.311	0.201	2.73699e-09	up
CM vs HM	4 - Mono	4a - CD14+ Mono	UBC	1.27734e-13	0.161015	0.945	0.93	2.76902e-09	up
CM vs HM	4 - Mono	4a - CD14+ Mono	TMEM30A	1.3126e-13	0.177242	0.225	0.133	2.84545e-09	up
CM vs HM	4 - Mono	4a - CD14+ Mono	LMTK2	1.43609e-13	0.121846	0.063	0.018	3.11316e-09	up
CM vs HM	4 - Mono	4a - CD14+ Mono	ACTB	1.53798e-13	0.0754045	0.998	1	3.33403e-09	up
CM vs HM	4 - Mono	4a - CD14+ Mono	PRICKLE1	1.5652e-13	0.105057	0.046	0.009	3.39305e-09	up
CM vs HM	4 - Mono	4a - CD14+ Mono	CD36	1.65286e-13	0.259978	0.736	0.63	3.58306e-09	up
CM vs HM	4 - Mono	4a - CD14+ Mono	AGFG1	1.6545e-13	0.181536	0.229	0.136	3.58663e-09	up
CM vs HM	4 - Mono	4a - CD14+ Mono	CRYBG3	1.68703e-13	0.180941	0.179	0.098	3.65715e-09	up
CM vs HM	4 - Mono	4a - CD14+ Mono	UBE2J2	1.78541e-13	0.141947	0.163	0.086	3.87041e-09	up
CM vs HM	4 - Mono	4a - CD14+ Mono	OSTM1	1.78763e-13	0.17122	0.159	0.084	3.87523e-09	up
CM vs HM	4 - Mono	4a - CD14+ Mono	TOB2	1.85054e-13	0.13595	0.152	0.078	4.01159e-09	up
CM vs HM	4 - Mono	4a - CD14+ Mono	MAN1A2	1.99886e-13	0.144633	0.244	0.147	4.33313e-09	up
CM vs HM	4 - Mono	4a - CD14+ Mono	MX1	2.0153e-13	-0.332661	0.223	0.308	4.36876e-09	down
CM vs HM	4 - Mono	4a - CD14+ Mono	SMCHD1	2.05438e-13	0.219478	0.357	0.242	4.45348e-09	up
CM vs HM	4 - Mono	4a - CD14+ Mono	PARVG	2.3574e-13	0.223059	0.597	0.459	5.11037e-09	up
CM vs HM	4 - Mono	4a - CD14+ Mono	C1orf35	2.36953e-13	0.171162	0.138	0.07	5.13666e-09	up
CM vs HM	4 - Mono	4a - CD14+ Mono	CDK11A	2.39375e-13	0.183168	0.256	0.158	5.18918e-09	up
CM vs HM	4 - Mono	4a - CD14+ Mono	GOLGA4	2.45183e-13	0.192198	0.258	0.161	5.31508e-09	up
CM vs HM	4 - Mono	4a - CD14+ Mono	TFAM	2.51752e-13	0.16252	0.258	0.159	5.45748e-09	up
CM vs HM	4 - Mono	4a - CD14+ Mono	CPEB4	2.55042e-13	0.12808	0.182	0.1	5.5288e-09	up
CM vs HM	4 - Mono	4a - CD14+ Mono	ADK	2.68111e-13	0.154626	0.185	0.105	5.81212e-09	up
CM vs HM	4 - Mono	4a - CD14+ Mono	TPM1	2.6918e-13	0.126066	0.085	0.033	5.83529e-09	up
CM vs HM	4 - Mono	4a - CD14+ Mono	NEK6	2.87241e-13	0.12972	0.123	0.058	6.22681e-09	up
CM vs HM	4 - Mono	4a - CD14+ Mono	NIPA2	2.87918e-13	0.133439	0.128	0.061	6.2415e-09	up
CM vs HM	4 - Mono	4a - CD14+ Mono	ATE1	2.96954e-13	0.154815	0.09	0.036	6.43738e-09	up
CM vs HM	4 - Mono	4a - CD14+ Mono	LIMS1	2.98419e-13	0.210259	0.446	0.32	6.46914e-09	up
CM vs HM	4 - Mono	4a - CD14+ Mono	SMPD2	2.98722e-13	0.103209	0.057	0.015	6.4757e-09	up
CM vs HM	4 - Mono	4a - CD14+ Mono	FCGR2B	3.06476e-13	-0.206782	0.056	0.112	6.64379e-09	down
CM vs HM	4 - Mono	4a - CD14+ Mono	PTRH1	3.51095e-13	0.106947	0.067	0.021	7.61105e-09	up
CM vs HM	4 - Mono	4a - CD14+ Mono	KCTD12	3.5291e-13	0.200473	0.595	0.466	7.65038e-09	up
CM vs HM	4 - Mono	4a - CD14+ Mono	RBM3	3.54093e-13	-0.23549	0.758	0.767	7.67604e-09	down
CM vs HM	4 - Mono	4a - CD14+ Mono	STAT3	3.7978e-13	0.203876	0.484	0.354	8.23286e-09	up
CM vs HM	4 - Mono	4a - CD14+ Mono	SPHK1	3.81684e-13	0.149697	0.084	0.033	8.27415e-09	up
CM vs HM	4 - Mono	4a - CD14+ Mono	RNMT	3.87485e-13	0.184642	0.211	0.124	8.39991e-09	up
CM vs HM	4 - Mono	4a - CD14+ Mono	EIF2B1	4.24867e-13	0.139978	0.157	0.082	9.21026e-09	up
CM vs HM	4 - Mono	4a - CD14+ Mono	POLR2J3	4.39047e-13	0.155389	0.205	0.119	9.51767e-09	up
CM vs HM	4 - Mono	4a - CD14+ Mono	RNASEH2B	4.60364e-13	0.149993	0.204	0.119	9.97977e-09	up
CM vs HM	4 - Mono	4a - CD14+ Mono	CCDC88B	4.76873e-13	0.20392	0.318	0.209	1.03377e-08	up
CM vs HM	4 - Mono	4a - CD14+ Mono	NIPSNAP2	4.901e-13	0.15091	0.218	0.129	1.06244e-08	up
CM vs HM	4 - Mono	4a - CD14+ Mono	PLSCR3	5.10769e-13	0.143124	0.239	0.145	1.10724e-08	up
CM vs HM	4 - Mono	4a - CD14+ Mono	BRK1	5.19213e-13	-0.231607	0.765	0.795	1.12555e-08	down
CM vs HM	4 - Mono	4a - CD14+ Mono	LEPROT	5.25146e-13	0.189994	0.312	0.205	1.13841e-08	up
CM vs HM	4 - Mono	4a - CD14+ Mono	AL021155.5	5.53087e-13	0.219554	0.223	0.135	1.19898e-08	up
CM vs HM	4 - Mono	4a - CD14+ Mono	FAM107B	5.94349e-13	0.150595	0.189	0.107	1.28843e-08	up
CM vs HM	4 - Mono	4a - CD14+ Mono	GLT1D1	6.24592e-13	0.158482	0.158	0.085	1.35399e-08	up
CM vs HM	4 - Mono	4a - CD14+ Mono	NT5C3A	6.45614e-13	0.173274	0.153	0.081	1.39956e-08	up
CM vs HM	4 - Mono	4a - CD14+ Mono	FBXW5	6.49479e-13	0.148298	0.295	0.187	1.40794e-08	up
CM vs HM	4 - Mono	4a - CD14+ Mono	RAB27A	6.6218e-13	0.170076	0.357	0.238	1.43547e-08	up
CM vs HM	4 - Mono	4a - CD14+ Mono	UBE2L6	7.07999e-13	-0.336564	0.456	0.502	1.5348e-08	down
CM vs HM	4 - Mono	4a - CD14+ Mono	WDSUB1	7.44334e-13	0.111433	0.077	0.028	1.61357e-08	up
CM vs HM	4 - Mono	4a - CD14+ Mono	LGALS1	7.49658e-13	0.203017	0.974	0.975	1.62511e-08	up
CM vs HM	4 - Mono	4a - CD14+ Mono	ATG3	7.65298e-13	0.197967	0.58	0.446	1.65901e-08	up
CM vs HM	4 - Mono	4a - CD14+ Mono	CKLF	7.67392e-13	0.233226	0.701	0.58	1.66355e-08	up
CM vs HM	4 - Mono	4a - CD14+ Mono	DCXR	7.79972e-13	0.166082	0.297	0.193	1.69082e-08	up
CM vs HM	4 - Mono	4a - CD14+ Mono	PAPOLA	8.29187e-13	0.189232	0.483	0.357	1.79751e-08	up
CM vs HM	4 - Mono	4a - CD14+ Mono	CKAP4	8.91814e-13	0.227786	0.326	0.222	1.93327e-08	up
CM vs HM	4 - Mono	4a - CD14+ Mono	ATXN7L3B	8.96228e-13	0.171895	0.244	0.151	1.94284e-08	up
CM vs HM	4 - Mono	4a - CD14+ Mono	NFKBID	9.24534e-13	0.192356	0.147	0.078	2.0042e-08	up
CM vs HM	4 - Mono	4a - CD14+ Mono	ATP2B1	1.02141e-12	0.276124	0.341	0.238	2.2142e-08	up
CM vs HM	4 - Mono	4a - CD14+ Mono	SLC9A3R1	1.03831e-12	0.149429	0.317	0.207	2.25084e-08	up
CM vs HM	4 - Mono	4a - CD14+ Mono	OXA1L	1.06077e-12	-0.297236	0.523	0.557	2.29954e-08	down
CM vs HM	4 - Mono	4a - CD14+ Mono	TTC32	1.08042e-12	0.112125	0.1	0.043	2.34214e-08	up
CM vs HM	4 - Mono	4a - CD14+ Mono	CSNK1G2	1.16069e-12	0.148445	0.197	0.114	2.51614e-08	up
CM vs HM	4 - Mono	4a - CD14+ Mono	FBXW11	1.17851e-12	0.146537	0.122	0.059	2.55478e-08	up
CM vs HM	4 - Mono	4a - CD14+ Mono	BTAF1	1.21462e-12	0.146859	0.155	0.083	2.63305e-08	up
CM vs HM	4 - Mono	4a - CD14+ Mono	CCDC69	1.28805e-12	0.203486	0.434	0.313	2.79224e-08	up
CM vs HM	4 - Mono	4a - CD14+ Mono	PSMD3	1.31583e-12	0.141553	0.206	0.119	2.85245e-08	up
CM vs HM	4 - Mono	4a - CD14+ Mono	SERPINB8	1.34762e-12	0.175841	0.21	0.125	2.92136e-08	up
CM vs HM	4 - Mono	4a - CD14+ Mono	EPHB6	1.39053e-12	0.133893	0.106	0.048	3.01439e-08	up
CM vs HM	4 - Mono	4a - CD14+ Mono	DMXL2	1.42995e-12	0.244732	0.572	0.45	3.09985e-08	up
CM vs HM	4 - Mono	4a - CD14+ Mono	UNC93B1	1.49359e-12	0.142795	0.175	0.098	3.2378e-08	up
CM vs HM	4 - Mono	4a - CD14+ Mono	CYSTM1	1.50168e-12	0.176185	0.246	0.154	3.25534e-08	up
CM vs HM	4 - Mono	4a - CD14+ Mono	WAC-AS1	1.54792e-12	0.148216	0.172	0.096	3.35558e-08	up
CM vs HM	4 - Mono	4a - CD14+ Mono	PRADC1	1.57257e-12	0.103092	0.067	0.022	3.40901e-08	up
CM vs HM	4 - Mono	4a - CD14+ Mono	TPR	1.59747e-12	0.206782	0.414	0.294	3.463e-08	up
CM vs HM	4 - Mono	4a - CD14+ Mono	PTGER4	1.64579e-12	0.148542	0.147	0.078	3.56774e-08	up
CM vs HM	4 - Mono	4a - CD14+ Mono	MIR222HG	1.67886e-12	0.120092	0.064	0.021	3.63944e-08	up
CM vs HM	4 - Mono	4a - CD14+ Mono	UBE2E3	1.68549e-12	0.172205	0.221	0.134	3.65381e-08	up
CM vs HM	4 - Mono	4a - CD14+ Mono	SUPT4H1	1.72362e-12	-0.245491	0.548	0.586	3.73647e-08	down
CM vs HM	4 - Mono	4a - CD14+ Mono	RALA	1.75954e-12	0.130085	0.216	0.127	3.81433e-08	up
CM vs HM	4 - Mono	4a - CD14+ Mono	PLEKHF2	1.79989e-12	0.136473	0.116	0.055	3.90181e-08	up
CM vs HM	4 - Mono	4a - CD14+ Mono	CEP85L	1.93966e-12	0.13183	0.135	0.069	4.20479e-08	up
CM vs HM	4 - Mono	4a - CD14+ Mono	NUS1	1.95303e-12	0.133549	0.123	0.06	4.23378e-08	up
CM vs HM	4 - Mono	4a - CD14+ Mono	NRG1	1.97764e-12	-0.353066	0.274	0.339	4.28714e-08	down
CM vs HM	4 - Mono	4a - CD14+ Mono	IFI6	2.01044e-12	0.272708	0.342	0.24	4.35823e-08	up
CM vs HM	4 - Mono	4a - CD14+ Mono	GPCPD1	2.0364e-12	0.209511	0.45	0.327	4.41451e-08	up
CM vs HM	4 - Mono	4a - CD14+ Mono	RBM42	2.09583e-12	0.142444	0.27	0.17	4.54335e-08	up
CM vs HM	4 - Mono	4a - CD14+ Mono	GINM1	2.13343e-12	0.129178	0.163	0.089	4.62486e-08	up
CM vs HM	4 - Mono	4a - CD14+ Mono	XRN2	2.16048e-12	0.215735	0.579	0.464	4.68349e-08	up
CM vs HM	4 - Mono	4a - CD14+ Mono	RBM47	2.19296e-12	0.196642	0.384	0.269	4.75389e-08	up
CM vs HM	4 - Mono	4a - CD14+ Mono	CD46	2.25554e-12	0.183294	0.388	0.267	4.88955e-08	up
CM vs HM	4 - Mono	4a - CD14+ Mono	ADAM19	2.29717e-12	0.158087	0.087	0.036	4.97981e-08	up
CM vs HM	4 - Mono	4a - CD14+ Mono	TNFAIP3	2.48484e-12	0.259074	0.276	0.182	5.38664e-08	up
CM vs HM	4 - Mono	4a - CD14+ Mono	HNRNPA2B1	2.7152e-12	0.179706	0.883	0.831	5.88602e-08	up
CM vs HM	4 - Mono	4a - CD14+ Mono	ITGB1BP1	2.76361e-12	0.141851	0.25	0.156	5.99096e-08	up
CM vs HM	4 - Mono	4a - CD14+ Mono	SWAP70	2.79858e-12	0.142911	0.18	0.102	6.06676e-08	up
CM vs HM	4 - Mono	4a - CD14+ Mono	MRPL33	2.82589e-12	0.207021	0.511	0.383	6.12596e-08	up
CM vs HM	4 - Mono	4a - CD14+ Mono	TMED7	2.97821e-12	0.158772	0.162	0.089	6.45617e-08	up
CM vs HM	4 - Mono	4a - CD14+ Mono	OGFOD3	3.07649e-12	0.102537	0.075	0.028	6.66922e-08	up
CM vs HM	4 - Mono	4a - CD14+ Mono	RENBP	3.13349e-12	0.185721	0.284	0.185	6.79278e-08	up
CM vs HM	4 - Mono	4a - CD14+ Mono	HSBP1L1	3.18455e-12	0.0850855	0.039	0.007	6.90346e-08	up
CM vs HM	4 - Mono	4a - CD14+ Mono	GOPC	4.15022e-12	0.11735	0.154	0.083	8.99685e-08	up
CM vs HM	4 - Mono	4a - CD14+ Mono	MFF	4.16576e-12	0.121891	0.298	0.192	9.03054e-08	up
CM vs HM	4 - Mono	4a - CD14+ Mono	EIF3K	4.31529e-12	-0.162679	0.91	0.927	9.35468e-08	down
CM vs HM	4 - Mono	4a - CD14+ Mono	ITPR2	4.52701e-12	0.175003	0.217	0.132	9.81366e-08	up
CM vs HM	4 - Mono	4a - CD14+ Mono	ZG16B	4.81803e-12	-0.113437	0.017	0.051	1.04445e-07	down
CM vs HM	4 - Mono	4a - CD14+ Mono	CCDC137	4.91335e-12	0.119266	0.089	0.038	1.06512e-07	up
CM vs HM	4 - Mono	4a - CD14+ Mono	TLE3	4.93473e-12	0.2039	0.22	0.134	1.06975e-07	up
CM vs HM	4 - Mono	4a - CD14+ Mono	MYL12A	5.08365e-12	0.174259	0.876	0.847	1.10203e-07	up
CM vs HM	4 - Mono	4a - CD14+ Mono	MLEC	5.10044e-12	0.150844	0.168	0.095	1.10567e-07	up
CM vs HM	4 - Mono	4a - CD14+ Mono	SDHAF1	5.18439e-12	0.101048	0.079	0.031	1.12387e-07	up
CM vs HM	4 - Mono	4a - CD14+ Mono	MGAT4A	5.32581e-12	0.159819	0.112	0.053	1.15453e-07	up
CM vs HM	4 - Mono	4a - CD14+ Mono	COX17	5.46708e-12	0.165477	0.447	0.317	1.18515e-07	up
CM vs HM	4 - Mono	4a - CD14+ Mono	SON	5.60297e-12	0.187896	0.746	0.629	1.21461e-07	up
CM vs HM	4 - Mono	4a - CD14+ Mono	TMSB4X	5.65513e-12	-0.100914	0.998	1	1.22592e-07	down
CM vs HM	4 - Mono	4a - CD14+ Mono	MOB1A	5.66117e-12	0.18851	0.61	0.488	1.22723e-07	up
CM vs HM	4 - Mono	4a - CD14+ Mono	CD93	5.75409e-12	0.228384	0.543	0.412	1.24737e-07	up
CM vs HM	4 - Mono	4a - CD14+ Mono	CD47	5.8649e-12	0.147986	0.167	0.093	1.27139e-07	up
CM vs HM	4 - Mono	4a - CD14+ Mono	SREBF1	6.43243e-12	0.118246	0.09	0.039	1.39442e-07	up
CM vs HM	4 - Mono	4a - CD14+ Mono	SNAP29	6.60912e-12	0.130468	0.275	0.175	1.43272e-07	up
CM vs HM	4 - Mono	4a - CD14+ Mono	ZDHHC24	6.83646e-12	0.112488	0.102	0.047	1.48201e-07	up
CM vs HM	4 - Mono	4a - CD14+ Mono	HIF1A	6.93496e-12	0.253557	0.479	0.352	1.50336e-07	up
CM vs HM	4 - Mono	4a - CD14+ Mono	UHRF1BP1L	7.05565e-12	0.14372	0.191	0.112	1.52952e-07	up
CM vs HM	4 - Mono	4a - CD14+ Mono	HSPA5	7.06971e-12	0.240328	0.426	0.312	1.53257e-07	up
CM vs HM	4 - Mono	4a - CD14+ Mono	DHRSX	7.14755e-12	0.115599	0.074	0.028	1.54945e-07	up
CM vs HM	4 - Mono	4a - CD14+ Mono	ATP6V1F	7.26688e-12	-0.210423	0.755	0.765	1.57532e-07	down
CM vs HM	4 - Mono	4a - CD14+ Mono	HTRA1	7.28319e-12	0.0771395	0.037	0.006	1.57885e-07	up
CM vs HM	4 - Mono	4a - CD14+ Mono	SH3KBP1	7.51952e-12	0.161015	0.415	0.29	1.63008e-07	up
CM vs HM	4 - Mono	4a - CD14+ Mono	MSN	8.08879e-12	0.185386	0.818	0.729	1.75349e-07	up
CM vs HM	4 - Mono	4a - CD14+ Mono	DESI2	8.49744e-12	0.109424	0.083	0.034	1.84208e-07	up
CM vs HM	4 - Mono	4a - CD14+ Mono	BCLAF1	9.13955e-12	0.200071	0.467	0.347	1.98127e-07	up
CM vs HM	4 - Mono	4a - CD14+ Mono	POMC	9.64539e-12	0.0973703	0.057	0.018	2.09093e-07	up
CM vs HM	4 - Mono	4a - CD14+ Mono	RAB11B	1.0519e-11	0.143682	0.315	0.211	2.28032e-07	up
CM vs HM	4 - Mono	4a - CD14+ Mono	RGS2	1.06193e-11	0.239998	0.808	0.734	2.30206e-07	up
CM vs HM	4 - Mono	4a - CD14+ Mono	INAFM1	1.0805e-11	0.0817683	0.043	0.01	2.34231e-07	up
CM vs HM	4 - Mono	4a - CD14+ Mono	PHRF1	1.08477e-11	0.149993	0.106	0.05	2.35156e-07	up
CM vs HM	4 - Mono	4a - CD14+ Mono	UTP18	1.12663e-11	0.11895	0.163	0.091	2.44231e-07	up
CM vs HM	4 - Mono	4a - CD14+ Mono	TBXAS1	1.13241e-11	-0.273307	0.54	0.575	2.45485e-07	down
CM vs HM	4 - Mono	4a - CD14+ Mono	HCAR2	1.14087e-11	0.125331	0.06	0.02	2.47319e-07	up
CM vs HM	4 - Mono	4a - CD14+ Mono	ARPC1B	1.15617e-11	0.0895399	0.981	0.985	2.50635e-07	up
CM vs HM	4 - Mono	4a - CD14+ Mono	GSR	1.2068e-11	0.126976	0.105	0.049	2.61611e-07	up
CM vs HM	4 - Mono	4a - CD14+ Mono	ZNF703	1.40104e-11	-0.174986	0.034	0.077	3.03716e-07	down
CM vs HM	4 - Mono	4a - CD14+ Mono	PXK	1.42349e-11	0.130166	0.211	0.128	3.08584e-07	up
CM vs HM	4 - Mono	4a - CD14+ Mono	DIPK2A	1.47726e-11	0.139742	0.135	0.071	3.2024e-07	up
CM vs HM	4 - Mono	4a - CD14+ Mono	MTRNR2L12	1.57382e-11	-0.164013	0.036	0.08	3.41172e-07	down
CM vs HM	4 - Mono	4a - CD14+ Mono	RASL11A	1.57483e-11	0.0809929	0.037	0.006	3.41392e-07	up
CM vs HM	4 - Mono	4a - CD14+ Mono	DOHH	1.71593e-11	0.0886112	0.043	0.01	3.7198e-07	up
CM vs HM	4 - Mono	4a - CD14+ Mono	CAMK1	1.75734e-11	0.128887	0.194	0.115	3.80957e-07	up
CM vs HM	4 - Mono	4a - CD14+ Mono	GMCL1	1.8109e-11	0.143587	0.127	0.066	3.92566e-07	up
CM vs HM	4 - Mono	4a - CD14+ Mono	DBI	1.94031e-11	0.202845	0.757	0.655	4.20621e-07	up
CM vs HM	4 - Mono	4a - CD14+ Mono	RPUSD1	2.00273e-11	0.102861	0.098	0.044	4.34153e-07	up
CM vs HM	4 - Mono	4a - CD14+ Mono	LSM12	2.05992e-11	0.177192	0.234	0.15	4.4655e-07	up
CM vs HM	4 - Mono	4a - CD14+ Mono	MTRF1L	2.06918e-11	0.105191	0.104	0.049	4.48558e-07	up
CM vs HM	4 - Mono	4a - CD14+ Mono	CLASP2	2.14503e-11	0.130807	0.149	0.082	4.65e-07	up
CM vs HM	4 - Mono	4a - CD14+ Mono	UBL3	2.17012e-11	0.115574	0.165	0.093	4.7044e-07	up
CM vs HM	4 - Mono	4a - CD14+ Mono	FPR2	2.29796e-11	0.125348	0.163	0.092	4.98152e-07	up
CM vs HM	4 - Mono	4a - CD14+ Mono	GADD45A	2.3992e-11	0.108771	0.077	0.031	5.20098e-07	up
CM vs HM	4 - Mono	4a - CD14+ Mono	RPS17	2.4111e-11	-0.202105	0.791	0.81	5.22678e-07	down
CM vs HM	4 - Mono	4a - CD14+ Mono	B4GALT5	2.43215e-11	0.135674	0.158	0.089	5.27242e-07	up
CM vs HM	4 - Mono	4a - CD14+ Mono	CSNK1G3	2.46264e-11	0.125278	0.108	0.052	5.33851e-07	up
CM vs HM	4 - Mono	4a - CD14+ Mono	ZNF580	2.49775e-11	0.139682	0.114	0.057	5.41463e-07	up
CM vs HM	4 - Mono	4a - CD14+ Mono	PTK2B	2.64423e-11	0.187302	0.395	0.28	5.73216e-07	up
CM vs HM	4 - Mono	4a - CD14+ Mono	LPGAT1	2.65349e-11	0.168328	0.236	0.149	5.75223e-07	up
CM vs HM	4 - Mono	4a - CD14+ Mono	CSF1R	2.82524e-11	-0.339206	0.355	0.409	6.12456e-07	down
CM vs HM	4 - Mono	4a - CD14+ Mono	DCK	2.84156e-11	0.135296	0.108	0.053	6.15994e-07	up
CM vs HM	4 - Mono	4a - CD14+ Mono	KCTD20	2.94006e-11	0.140551	0.226	0.14	6.37347e-07	up
CM vs HM	4 - Mono	4a - CD14+ Mono	SEPTIN1	2.94102e-11	0.0948678	0.042	0.01	6.37555e-07	up
CM vs HM	4 - Mono	4a - CD14+ Mono	SLX1A	2.9653e-11	0.0745996	0.041	0.009	6.42817e-07	up
CM vs HM	4 - Mono	4a - CD14+ Mono	AC011446.2	3.10658e-11	0.166039	0.06	0.02	6.73445e-07	up
CM vs HM	4 - Mono	4a - CD14+ Mono	C20orf27	3.20541e-11	-0.25982	0.522	0.563	6.94868e-07	down
CM vs HM	4 - Mono	4a - CD14+ Mono	SPINT1	3.23795e-11	0.110917	0.142	0.077	7.01922e-07	up
CM vs HM	4 - Mono	4a - CD14+ Mono	HIST1H1D	3.25174e-11	0.165417	0.088	0.039	7.04912e-07	up
CM vs HM	4 - Mono	4a - CD14+ Mono	RNF135	3.39633e-11	0.139336	0.19	0.114	7.36256e-07	up
CM vs HM	4 - Mono	4a - CD14+ Mono	FHOD1	3.45208e-11	0.131902	0.205	0.123	7.48342e-07	up
CM vs HM	4 - Mono	4a - CD14+ Mono	EVI2B	3.48868e-11	-0.217776	0.763	0.791	7.56275e-07	down
CM vs HM	4 - Mono	4a - CD14+ Mono	TRIM27	3.63868e-11	0.147321	0.262	0.17	7.88793e-07	up
CM vs HM	4 - Mono	4a - CD14+ Mono	CLEC4D	3.64918e-11	0.149738	0.18	0.106	7.91069e-07	up
CM vs HM	4 - Mono	4a - CD14+ Mono	SNAPC2	3.82436e-11	0.131626	0.135	0.072	8.29046e-07	up
CM vs HM	4 - Mono	4a - CD14+ Mono	WDR74	3.95519e-11	0.239922	0.333	0.231	8.57407e-07	up
CM vs HM	4 - Mono	4a - CD14+ Mono	CD48	4.25922e-11	-0.208326	0.773	0.782	9.23314e-07	down
CM vs HM	4 - Mono	4a - CD14+ Mono	GPSM3	4.27564e-11	-0.204215	0.855	0.863	9.26874e-07	down
CM vs HM	4 - Mono	4a - CD14+ Mono	GLMP	4.37528e-11	-0.288327	0.18	0.24	9.48474e-07	down
CM vs HM	4 - Mono	4a - CD14+ Mono	YKT6	4.40652e-11	0.123701	0.117	0.059	9.55245e-07	up
CM vs HM	4 - Mono	4a - CD14+ Mono	PRR14L	4.43795e-11	0.142731	0.22	0.138	9.62058e-07	up
CM vs HM	4 - Mono	4a - CD14+ Mono	MAD2L2	4.45749e-11	0.127755	0.206	0.125	9.66296e-07	up
CM vs HM	4 - Mono	4a - CD14+ Mono	TBC1D9B	4.53918e-11	0.131214	0.192	0.115	9.84003e-07	up
CM vs HM	4 - Mono	4a - CD14+ Mono	OSTF1	4.57045e-11	0.183439	0.579	0.463	9.90782e-07	up
CM vs HM	4 - Mono	4a - CD14+ Mono	DNAAF2	4.6366e-11	0.10189	0.077	0.032	1.00512e-06	up
CM vs HM	4 - Mono	4a - CD14+ Mono	DENND10	4.64095e-11	0.176349	0.412	0.303	1.00606e-06	up
CM vs HM	4 - Mono	4a - CD14+ Mono	JAK3	4.72072e-11	0.180665	0.248	0.162	1.02336e-06	up
CM vs HM	4 - Mono	4a - CD14+ Mono	ELF1	4.91377e-11	0.178749	0.458	0.336	1.06521e-06	up
CM vs HM	4 - Mono	4a - CD14+ Mono	TIMM50	4.95449e-11	0.112119	0.124	0.064	1.07403e-06	up
CM vs HM	4 - Mono	4a - CD14+ Mono	PKN2	4.9717e-11	0.185962	0.321	0.225	1.07777e-06	up
CM vs HM	4 - Mono	4a - CD14+ Mono	VPS51	5.11297e-11	0.135615	0.26	0.166	1.10839e-06	up
CM vs HM	4 - Mono	4a - CD14+ Mono	ARRDC1	5.12633e-11	0.15533	0.339	0.232	1.11128e-06	up
CM vs HM	4 - Mono	4a - CD14+ Mono	RTL8C	5.28036e-11	0.142859	0.277	0.183	1.14468e-06	up
CM vs HM	4 - Mono	4a - CD14+ Mono	TRIM25	5.30684e-11	0.146909	0.276	0.181	1.15042e-06	up
CM vs HM	4 - Mono	4a - CD14+ Mono	PPIP5K2	5.39315e-11	0.14062	0.234	0.148	1.16913e-06	up
CM vs HM	4 - Mono	4a - CD14+ Mono	KPNA3	5.44271e-11	0.0917984	0.129	0.067	1.17987e-06	up
CM vs HM	4 - Mono	4a - CD14+ Mono	ATAD2B	5.53037e-11	0.152301	0.171	0.1	1.19887e-06	up
CM vs HM	4 - Mono	4a - CD14+ Mono	OGFR	5.63005e-11	0.137903	0.261	0.169	1.22048e-06	up
CM vs HM	4 - Mono	4a - CD14+ Mono	HSD17B11	5.75292e-11	-0.268176	0.508	0.548	1.24712e-06	down
CM vs HM	4 - Mono	4a - CD14+ Mono	HEBP2	5.79678e-11	0.139662	0.215	0.133	1.25663e-06	up
CM vs HM	4 - Mono	4a - CD14+ Mono	IFITM3	5.85824e-11	-0.352069	0.812	0.823	1.26995e-06	down
CM vs HM	4 - Mono	4a - CD14+ Mono	MESD	6.0318e-11	0.138499	0.23	0.145	1.30757e-06	up
CM vs HM	4 - Mono	4a - CD14+ Mono	SGTB	6.0728e-11	0.164595	0.144	0.08	1.31646e-06	up
CM vs HM	4 - Mono	4a - CD14+ Mono	CPNE3	6.17105e-11	0.163296	0.29	0.196	1.33776e-06	up
CM vs HM	4 - Mono	4a - CD14+ Mono	SLX1B	6.19831e-11	0.077908	0.04	0.009	1.34367e-06	up
CM vs HM	4 - Mono	4a - CD14+ Mono	GPR35	6.3379e-11	0.0996824	0.138	0.074	1.37393e-06	up
CM vs HM	4 - Mono	4a - CD14+ Mono	IRF1	6.61427e-11	0.241334	0.583	0.465	1.43384e-06	up
CM vs HM	4 - Mono	4a - CD14+ Mono	DAPK3	6.62594e-11	0.106948	0.086	0.038	1.43637e-06	up
CM vs HM	4 - Mono	4a - CD14+ Mono	MGST3	7.06791e-11	0.184487	0.539	0.415	1.53218e-06	up
CM vs HM	4 - Mono	4a - CD14+ Mono	SGMS1	7.1929e-11	0.131495	0.113	0.057	1.55928e-06	up
CM vs HM	4 - Mono	4a - CD14+ Mono	TRAM1	7.24771e-11	0.170086	0.352	0.248	1.57116e-06	up
CM vs HM	4 - Mono	4a - CD14+ Mono	TLK1	7.62463e-11	0.144492	0.134	0.073	1.65287e-06	up
CM vs HM	4 - Mono	4a - CD14+ Mono	HNRNPA0	7.62921e-11	0.116194	0.41	0.291	1.65386e-06	up
CM vs HM	4 - Mono	4a - CD14+ Mono	CLEC10A	7.81837e-11	-0.279239	0.049	0.096	1.69487e-06	down
CM vs HM	4 - Mono	4a - CD14+ Mono	RING1	7.9909e-11	0.112399	0.093	0.042	1.73227e-06	up
CM vs HM	4 - Mono	4a - CD14+ Mono	MICAL2	8.07838e-11	0.152058	0.224	0.143	1.75123e-06	up
CM vs HM	4 - Mono	4a - CD14+ Mono	HIPK1	8.23207e-11	0.177001	0.25	0.163	1.78455e-06	up
CM vs HM	4 - Mono	4a - CD14+ Mono	HPS3	8.28896e-11	0.106709	0.152	0.085	1.79688e-06	up
CM vs HM	4 - Mono	4a - CD14+ Mono	FBXL5	8.30396e-11	0.157611	0.652	0.524	1.80013e-06	up
CM vs HM	4 - Mono	4a - CD14+ Mono	RPP38	8.58992e-11	0.0932982	0.098	0.046	1.86212e-06	up
CM vs HM	4 - Mono	4a - CD14+ Mono	PCMTD1	8.64272e-11	0.140048	0.198	0.12	1.87357e-06	up
CM vs HM	4 - Mono	4a - CD14+ Mono	TWF1	8.76524e-11	0.118554	0.104	0.051	1.90013e-06	up
CM vs HM	4 - Mono	4a - CD14+ Mono	METTL7B	8.88047e-11	0.0742571	0.04	0.009	1.92511e-06	up
CM vs HM	4 - Mono	4a - CD14+ Mono	DNAJC8	9.01985e-11	0.182691	0.433	0.317	1.95532e-06	up
CM vs HM	4 - Mono	4a - CD14+ Mono	LTBP3	9.04815e-11	0.0804516	0.038	0.008	1.96146e-06	up
CM vs HM	4 - Mono	4a - CD14+ Mono	HMGN2	9.15292e-11	-0.20507	0.742	0.756	1.98417e-06	down
CM vs HM	4 - Mono	4a - CD14+ Mono	GNA15	9.25354e-11	0.132023	0.241	0.153	2.00598e-06	up
CM vs HM	4 - Mono	4a - CD14+ Mono	PHF20L1	9.30464e-11	0.155215	0.265	0.175	2.01706e-06	up
CM vs HM	4 - Mono	4a - CD14+ Mono	TNRC18	9.36726e-11	0.125387	0.203	0.124	2.03063e-06	up
CM vs HM	4 - Mono	4a - CD14+ Mono	OSBPL9	9.48775e-11	0.13744	0.163	0.095	2.05675e-06	up
CM vs HM	4 - Mono	4a - CD14+ Mono	NFKBIB	1.03663e-10	0.111682	0.174	0.102	2.24721e-06	up
CM vs HM	4 - Mono	4a - CD14+ Mono	RPL23	1.10751e-10	-0.199385	0.794	0.811	2.40086e-06	down
CM vs HM	4 - Mono	4a - CD14+ Mono	CRYZ	1.12227e-10	0.0636557	0.036	0.007	2.43286e-06	up
CM vs HM	4 - Mono	4a - CD14+ Mono	IL6ST	1.14292e-10	0.135547	0.165	0.097	2.47761e-06	up
CM vs HM	4 - Mono	4a - CD14+ Mono	LRP3	1.16272e-10	0.0752578	0.049	0.014	2.52055e-06	up
CM vs HM	4 - Mono	4a - CD14+ Mono	ERC1	1.19413e-10	0.119433	0.115	0.059	2.58864e-06	up
CM vs HM	4 - Mono	4a - CD14+ Mono	CNOT8	1.22792e-10	0.111453	0.237	0.151	2.66189e-06	up
CM vs HM	4 - Mono	4a - CD14+ Mono	ALDH16A1	1.23158e-10	0.113106	0.136	0.074	2.66982e-06	up
CM vs HM	4 - Mono	4a - CD14+ Mono	LYST	1.2413e-10	0.183005	0.672	0.567	2.69088e-06	up
CM vs HM	4 - Mono	4a - CD14+ Mono	CLIC4	1.25705e-10	0.123391	0.145	0.08	2.72504e-06	up
CM vs HM	4 - Mono	4a - CD14+ Mono	CEBPG	1.26054e-10	0.135779	0.26	0.169	2.7326e-06	up
CM vs HM	4 - Mono	4a - CD14+ Mono	CGAS	1.2658e-10	0.106273	0.117	0.06	2.744e-06	up
CM vs HM	4 - Mono	4a - CD14+ Mono	ILF3	1.26609e-10	0.174967	0.37	0.265	2.74463e-06	up
CM vs HM	4 - Mono	4a - CD14+ Mono	SPATA2L	1.26678e-10	0.0983459	0.069	0.027	2.74613e-06	up
CM vs HM	4 - Mono	4a - CD14+ Mono	MORF4L1	1.33128e-10	0.186714	0.627	0.513	2.88595e-06	up
CM vs HM	4 - Mono	4a - CD14+ Mono	SRSF5	1.37695e-10	0.180474	0.787	0.698	2.98495e-06	up
CM vs HM	4 - Mono	4a - CD14+ Mono	CLEC4A	1.37826e-10	-0.281421	0.491	0.524	2.9878e-06	down
CM vs HM	4 - Mono	4a - CD14+ Mono	CD163	1.52506e-10	0.184627	0.398	0.286	3.30602e-06	up
CM vs HM	4 - Mono	4a - CD14+ Mono	FAM98C	1.52995e-10	0.0849378	0.074	0.031	3.31662e-06	up
CM vs HM	4 - Mono	4a - CD14+ Mono	PAFAH1B2	1.60532e-10	0.135409	0.203	0.125	3.48002e-06	up
CM vs HM	4 - Mono	4a - CD14+ Mono	PDLIM2	1.61872e-10	0.122163	0.286	0.188	3.50906e-06	up
CM vs HM	4 - Mono	4a - CD14+ Mono	NIBAN1	1.62823e-10	0.180408	0.291	0.199	3.52967e-06	up
CM vs HM	4 - Mono	4a - CD14+ Mono	TRIM8	1.63472e-10	0.139596	0.258	0.169	3.54375e-06	up
CM vs HM	4 - Mono	4a - CD14+ Mono	SNCA	1.68417e-10	0.109204	0.105	0.052	3.65095e-06	up
CM vs HM	4 - Mono	4a - CD14+ Mono	LPCAT1	1.692e-10	0.132995	0.144	0.08	3.66792e-06	up
CM vs HM	4 - Mono	4a - CD14+ Mono	EPB41L4A-AS1	1.7163e-10	-0.22618	0.129	0.187	3.7206e-06	down
CM vs HM	4 - Mono	4a - CD14+ Mono	RHOB	1.79457e-10	-0.395474	0.245	0.303	3.89027e-06	down
CM vs HM	4 - Mono	4a - CD14+ Mono	NDUFC1	1.85037e-10	0.194672	0.45	0.333	4.01124e-06	up
CM vs HM	4 - Mono	4a - CD14+ Mono	PAIP1	1.87076e-10	0.11053	0.098	0.047	4.05544e-06	up
CM vs HM	4 - Mono	4a - CD14+ Mono	TMED2	1.98795e-10	0.130393	0.298	0.201	4.30948e-06	up
CM vs HM	4 - Mono	4a - CD14+ Mono	UTP3	2.00371e-10	0.103165	0.173	0.102	4.34364e-06	up
CM vs HM	4 - Mono	4a - CD14+ Mono	JMJD6	2.09798e-10	0.149725	0.194	0.12	4.548e-06	up
CM vs HM	4 - Mono	4a - CD14+ Mono	ATP6V0D1	2.25471e-10	0.17654	0.779	0.679	4.88776e-06	up
CM vs HM	4 - Mono	4a - CD14+ Mono	RBPJ	2.33314e-10	0.140255	0.411	0.296	5.05778e-06	up
CM vs HM	4 - Mono	4a - CD14+ Mono	SRSF11	2.34727e-10	0.194238	0.476	0.362	5.08841e-06	up
CM vs HM	4 - Mono	4a - CD14+ Mono	CARD8-AS1	2.43437e-10	0.102395	0.12	0.063	5.27724e-06	up
CM vs HM	4 - Mono	4a - CD14+ Mono	ACPP	2.52355e-10	0.124265	0.11	0.056	5.47056e-06	up
CM vs HM	4 - Mono	4a - CD14+ Mono	FASN	2.55227e-10	0.0784386	0.049	0.015	5.53282e-06	up
CM vs HM	4 - Mono	4a - CD14+ Mono	SRGAP2B	2.60568e-10	0.14451	0.151	0.087	5.64859e-06	up
CM vs HM	4 - Mono	4a - CD14+ Mono	MCRIP2	2.61137e-10	0.103714	0.096	0.046	5.66094e-06	up
CM vs HM	4 - Mono	4a - CD14+ Mono	TCIRG1	2.61651e-10	0.198102	0.709	0.591	5.67207e-06	up
CM vs HM	4 - Mono	4a - CD14+ Mono	TRMT6	2.72008e-10	0.127776	0.13	0.071	5.89658e-06	up
CM vs HM	4 - Mono	4a - CD14+ Mono	SSBP4	2.72634e-10	0.114115	0.105	0.052	5.91015e-06	up
CM vs HM	4 - Mono	4a - CD14+ Mono	SESN3	2.73754e-10	0.125821	0.116	0.061	5.93443e-06	up
CM vs HM	4 - Mono	4a - CD14+ Mono	TOMM20	2.74878e-10	-0.20345	0.511	0.555	5.9588e-06	down
CM vs HM	4 - Mono	4a - CD14+ Mono	AC011472.2	2.76817e-10	0.130241	0.177	0.106	6.00083e-06	up
CM vs HM	4 - Mono	4a - CD14+ Mono	HK2	2.79426e-10	0.12724	0.19	0.117	6.0574e-06	up
CM vs HM	4 - Mono	4a - CD14+ Mono	TMCO3	2.81007e-10	0.103893	0.133	0.073	6.09166e-06	up
CM vs HM	4 - Mono	4a - CD14+ Mono	RASSF2	2.84442e-10	0.186577	0.514	0.394	6.16614e-06	up
CM vs HM	4 - Mono	4a - CD14+ Mono	CCDC88A	2.87024e-10	0.173991	0.517	0.4	6.2221e-06	up
CM vs HM	4 - Mono	4a - CD14+ Mono	JMJD1C	2.88819e-10	0.252241	0.444	0.34	6.26102e-06	up
CM vs HM	4 - Mono	4a - CD14+ Mono	NSD1	3.02203e-10	0.156872	0.31	0.213	6.55115e-06	up
CM vs HM	4 - Mono	4a - CD14+ Mono	GGNBP2	3.09164e-10	0.148259	0.352	0.249	6.70206e-06	up
CM vs HM	4 - Mono	4a - CD14+ Mono	ACAP1	3.22457e-10	0.159034	0.296	0.204	6.99023e-06	up
CM vs HM	4 - Mono	4a - CD14+ Mono	NIBAN2	3.22906e-10	0.16062	0.18	0.111	6.99997e-06	up
CM vs HM	4 - Mono	4a - CD14+ Mono	CPSF2	3.33613e-10	0.122846	0.173	0.104	7.23206e-06	up
CM vs HM	4 - Mono	4a - CD14+ Mono	QDPR	3.37041e-10	0.0810176	0.084	0.038	7.30637e-06	up
CM vs HM	4 - Mono	4a - CD14+ Mono	AP001189.1	3.4905e-10	0.095541	0.057	0.02	7.56671e-06	up
CM vs HM	4 - Mono	4a - CD14+ Mono	NME3	3.49436e-10	0.122212	0.281	0.187	7.57507e-06	up
CM vs HM	4 - Mono	4a - CD14+ Mono	EIF4G2	3.57339e-10	0.180796	0.725	0.616	7.74639e-06	up
CM vs HM	4 - Mono	4a - CD14+ Mono	IRF9	3.58047e-10	-0.260239	0.231	0.291	7.76173e-06	down
CM vs HM	4 - Mono	4a - CD14+ Mono	RTN4	3.6135e-10	0.19261	0.495	0.38	7.83335e-06	up
CM vs HM	4 - Mono	4a - CD14+ Mono	NUP50	3.73753e-10	0.101244	0.233	0.148	8.10222e-06	up
CM vs HM	4 - Mono	4a - CD14+ Mono	PADI2	3.75754e-10	0.1209	0.109	0.056	8.1456e-06	up
CM vs HM	4 - Mono	4a - CD14+ Mono	C5orf56	3.84061e-10	0.0974555	0.088	0.04	8.32567e-06	up
CM vs HM	4 - Mono	4a - CD14+ Mono	MAPK14	3.85784e-10	0.121115	0.23	0.149	8.36303e-06	up
CM vs HM	4 - Mono	4a - CD14+ Mono	HLA-E	3.94853e-10	-0.137822	0.923	0.942	8.55962e-06	down
CM vs HM	4 - Mono	4a - CD14+ Mono	HOMER3	4.00939e-10	0.122442	0.145	0.082	8.69156e-06	up
CM vs HM	4 - Mono	4a - CD14+ Mono	BSG	4.20369e-10	-0.254453	0.371	0.412	9.11277e-06	down
CM vs HM	4 - Mono	4a - CD14+ Mono	UBL5	4.39997e-10	0.181754	0.845	0.769	9.53826e-06	up
CM vs HM	4 - Mono	4a - CD14+ Mono	RFK	4.46654e-10	0.118599	0.097	0.047	9.68257e-06	up
CM vs HM	4 - Mono	4a - CD14+ Mono	MPLKIP	4.54647e-10	0.122966	0.254	0.166	9.85585e-06	up
CM vs HM	4 - Mono	4a - CD14+ Mono	LSM2	4.59755e-10	0.129992	0.288	0.195	9.96656e-06	up
CM vs HM	4 - Mono	4a - CD14+ Mono	AASDHPPT	4.61805e-10	0.125154	0.161	0.095	1.0011e-05	up
CM vs HM	4 - Mono	4a - CD14+ Mono	CDC40	4.63475e-10	0.148236	0.374	0.268	1.00472e-05	up
CM vs HM	4 - Mono	4a - CD14+ Mono	PRRC2C	4.69609e-10	0.168014	0.588	0.47	1.01802e-05	up
CM vs HM	4 - Mono	4a - CD14+ Mono	WDR60	4.75347e-10	0.093022	0.064	0.025	1.03046e-05	up
CM vs HM	4 - Mono	4a - CD14+ Mono	SPAST	4.82997e-10	0.110611	0.099	0.048	1.04704e-05	up
CM vs HM	4 - Mono	4a - CD14+ Mono	ANAPC15	4.90055e-10	0.173848	0.392	0.282	1.06234e-05	up
CM vs HM	4 - Mono	4a - CD14+ Mono	PSMD1	4.94072e-10	0.152369	0.26	0.174	1.07105e-05	up
CM vs HM	4 - Mono	4a - CD14+ Mono	FAM204A	5.06049e-10	0.174479	0.381	0.277	1.09701e-05	up
CM vs HM	4 - Mono	4a - CD14+ Mono	CD14	5.24434e-10	0.151661	0.936	0.907	1.13687e-05	up
CM vs HM	4 - Mono	4a - CD14+ Mono	SUCO	5.36677e-10	0.121519	0.117	0.062	1.16341e-05	up
CM vs HM	4 - Mono	4a - CD14+ Mono	ARFIP1	5.52441e-10	0.106833	0.166	0.098	1.19758e-05	up
CM vs HM	4 - Mono	4a - CD14+ Mono	INPP5K	5.82286e-10	0.097684	0.147	0.084	1.26228e-05	up
CM vs HM	4 - Mono	4a - CD14+ Mono	SHROOM1	5.96529e-10	0.069801	0.05	0.016	1.29316e-05	up
CM vs HM	4 - Mono	4a - CD14+ Mono	HMGB2	6.33076e-10	0.195025	0.55	0.443	1.37238e-05	up
CM vs HM	4 - Mono	4a - CD14+ Mono	CRYBG1	6.38501e-10	0.140241	0.254	0.168	1.38414e-05	up
CM vs HM	4 - Mono	4a - CD14+ Mono	TRG-AS1	6.40231e-10	-0.18544	0.095	0.149	1.38789e-05	down
CM vs HM	4 - Mono	4a - CD14+ Mono	SLC43A2	6.42761e-10	0.189512	0.357	0.256	1.39338e-05	up
CM vs HM	4 - Mono	4a - CD14+ Mono	S100A11	6.47597e-10	0.0861351	0.986	0.996	1.40386e-05	up
CM vs HM	4 - Mono	4a - CD14+ Mono	ADCY3	6.47802e-10	0.0871503	0.056	0.02	1.40431e-05	up
CM vs HM	4 - Mono	4a - CD14+ Mono	CSNK2A1	6.54121e-10	0.143207	0.271	0.184	1.418e-05	up
CM vs HM	4 - Mono	4a - CD14+ Mono	NDST1	6.62262e-10	0.137104	0.116	0.062	1.43565e-05	up
CM vs HM	4 - Mono	4a - CD14+ Mono	NAGPA	6.77515e-10	0.0848341	0.119	0.063	1.46872e-05	up
CM vs HM	4 - Mono	4a - CD14+ Mono	TICAM2	6.90269e-10	0.101965	0.1	0.05	1.49636e-05	up
CM vs HM	4 - Mono	4a - CD14+ Mono	FADD	7.01069e-10	0.0747392	0.07	0.029	1.51978e-05	up
CM vs HM	4 - Mono	4a - CD14+ Mono	NOTCH2NLC	7.02786e-10	0.100963	0.07	0.029	1.5235e-05	up
CM vs HM	4 - Mono	4a - CD14+ Mono	YTHDC2	7.04693e-10	0.0978126	0.102	0.051	1.52763e-05	up
CM vs HM	4 - Mono	4a - CD14+ Mono	FLOT2	7.32849e-10	0.178816	0.421	0.315	1.58867e-05	up
CM vs HM	4 - Mono	4a - CD14+ Mono	NUCKS1	7.33444e-10	0.155659	0.298	0.206	1.58996e-05	up
CM vs HM	4 - Mono	4a - CD14+ Mono	HIPK2	7.39895e-10	0.138006	0.204	0.129	1.60394e-05	up
CM vs HM	4 - Mono	4a - CD14+ Mono	LTA4H	7.80144e-10	-0.178109	0.754	0.762	1.6912e-05	down
CM vs HM	4 - Mono	4a - CD14+ Mono	RECQL	7.92797e-10	0.116101	0.188	0.117	1.71862e-05	up
CM vs HM	4 - Mono	4a - CD14+ Mono	SH2D3C	7.94392e-10	-0.259059	0.137	0.194	1.72208e-05	down
CM vs HM	4 - Mono	4a - CD14+ Mono	SERPINA1	8.09161e-10	-0.18741	0.929	0.938	1.7541e-05	down
CM vs HM	4 - Mono	4a - CD14+ Mono	CRTC1	8.13331e-10	0.0874376	0.079	0.035	1.76314e-05	up
CM vs HM	4 - Mono	4a - CD14+ Mono	DNTTIP2	8.15413e-10	0.181287	0.273	0.187	1.76765e-05	up
CM vs HM	4 - Mono	4a - CD14+ Mono	ASF1A	8.25022e-10	0.0806339	0.08	0.036	1.78848e-05	up
CM vs HM	4 - Mono	4a - CD14+ Mono	CXorf38	8.25182e-10	0.106564	0.191	0.118	1.78883e-05	up
CM vs HM	4 - Mono	4a - CD14+ Mono	ZNF32	8.27115e-10	0.111381	0.106	0.054	1.79302e-05	up
CM vs HM	4 - Mono	4a - CD14+ Mono	UBQLN1	8.45938e-10	0.122232	0.244	0.16	1.83382e-05	up
CM vs HM	4 - Mono	4a - CD14+ Mono	IGLV1-40	9.21855e-10	0.063065	0.018	0	1.9984e-05	up
CM vs HM	4 - Mono	4a - CD14+ Mono	FAM207A	9.2609e-10	0.0862967	0.071	0.03	2.00758e-05	up
CM vs HM	4 - Mono	4a - CD14+ Mono	HBS1L	9.28305e-10	0.131251	0.137	0.079	2.01238e-05	up
CM vs HM	4 - Mono	4a - CD14+ Mono	CBWD1	9.34721e-10	-0.239098	0.167	0.225	2.02629e-05	down
CM vs HM	4 - Mono	4a - CD14+ Mono	FOXN2	9.50981e-10	0.101273	0.258	0.171	2.06154e-05	up
CM vs HM	4 - Mono	4a - CD14+ Mono	MCFD2	9.52168e-10	0.12142	0.174	0.106	2.06411e-05	up
CM vs HM	4 - Mono	4a - CD14+ Mono	PLPPR2	9.59515e-10	0.100683	0.244	0.16	2.08004e-05	up
CM vs HM	4 - Mono	4a - CD14+ Mono	COX7C	9.95762e-10	-0.161723	0.869	0.887	2.15861e-05	down
CM vs HM	4 - Mono	4a - CD14+ Mono	CBX1	1.00415e-09	0.111164	0.165	0.098	2.17681e-05	up
CM vs HM	4 - Mono	4a - CD14+ Mono	DCUN1D5	1.04721e-09	0.0800654	0.131	0.072	2.27014e-05	up
CM vs HM	4 - Mono	4a - CD14+ Mono	SPTLC2	1.05178e-09	0.145037	0.352	0.251	2.28004e-05	up
CM vs HM	4 - Mono	4a - CD14+ Mono	WDR83OS	1.05325e-09	-0.192234	0.754	0.774	2.28324e-05	down
CM vs HM	4 - Mono	4a - CD14+ Mono	PARP10	1.05375e-09	0.117396	0.162	0.097	2.28432e-05	up
CM vs HM	4 - Mono	4a - CD14+ Mono	SIGLEC14	1.0549e-09	0.111442	0.087	0.041	2.28682e-05	up
CM vs HM	4 - Mono	4a - CD14+ Mono	ZPR1	1.0703e-09	0.085319	0.133	0.074	2.3202e-05	up
CM vs HM	4 - Mono	4a - CD14+ Mono	MZT2B	1.07497e-09	0.0950057	0.118	0.063	2.33032e-05	up
CM vs HM	4 - Mono	4a - CD14+ Mono	MAPK8IP3	1.11165e-09	0.150078	0.168	0.102	2.40984e-05	up
CM vs HM	4 - Mono	4a - CD14+ Mono	YWHAQ	1.11552e-09	0.114694	0.304	0.208	2.41822e-05	up
CM vs HM	4 - Mono	4a - CD14+ Mono	BTG1	1.11981e-09	0.233711	0.621	0.517	2.42752e-05	up
CM vs HM	4 - Mono	4a - CD14+ Mono	EIF3J	1.14323e-09	0.115975	0.175	0.107	2.4783e-05	up
CM vs HM	4 - Mono	4a - CD14+ Mono	HERC2	1.21681e-09	0.147802	0.116	0.064	2.6378e-05	up
CM vs HM	4 - Mono	4a - CD14+ Mono	GM2A	1.24409e-09	-0.221277	0.203	0.263	2.69693e-05	down
CM vs HM	4 - Mono	4a - CD14+ Mono	ZNF322	1.33115e-09	0.085973	0.104	0.053	2.88566e-05	up
CM vs HM	4 - Mono	4a - CD14+ Mono	CCL3	1.35698e-09	0.236505	0.231	0.156	2.94165e-05	up
CM vs HM	4 - Mono	4a - CD14+ Mono	RAB3D	1.36235e-09	0.130531	0.356	0.254	2.95331e-05	up
CM vs HM	4 - Mono	4a - CD14+ Mono	FAM120AOS	1.36741e-09	0.0786161	0.136	0.077	2.96427e-05	up
CM vs HM	4 - Mono	4a - CD14+ Mono	KANSL1-AS1	1.41481e-09	0.0646215	0.042	0.012	3.06703e-05	up
CM vs HM	4 - Mono	4a - CD14+ Mono	ASPSCR1	1.43455e-09	0.0850184	0.119	0.064	3.10981e-05	up
CM vs HM	4 - Mono	4a - CD14+ Mono	POLR2L	1.44425e-09	0.177903	0.778	0.68	3.13084e-05	up
CM vs HM	4 - Mono	4a - CD14+ Mono	POLDIP2	1.47257e-09	0.115586	0.129	0.072	3.19225e-05	up
CM vs HM	4 - Mono	4a - CD14+ Mono	NIPBL-DT	1.47941e-09	0.0600089	0.037	0.009	3.20707e-05	up
CM vs HM	4 - Mono	4a - CD14+ Mono	BAX	1.53318e-09	0.177722	0.448	0.337	3.32363e-05	up
CM vs HM	4 - Mono	4a - CD14+ Mono	GMPPB	1.60577e-09	0.0781063	0.066	0.027	3.48098e-05	up
CM vs HM	4 - Mono	4a - CD14+ Mono	CNPY3	1.61657e-09	-0.175205	0.792	0.811	3.5044e-05	down
CM vs HM	4 - Mono	4a - CD14+ Mono	STK11	1.63561e-09	0.0968272	0.057	0.021	3.54568e-05	up
CM vs HM	4 - Mono	4a - CD14+ Mono	CCT8	1.70477e-09	-0.255718	0.455	0.489	3.69559e-05	down
CM vs HM	4 - Mono	4a - CD14+ Mono	ARL3	1.72227e-09	0.104502	0.146	0.085	3.73353e-05	up
CM vs HM	4 - Mono	4a - CD14+ Mono	HMGCR	1.73083e-09	0.0992653	0.112	0.06	3.75209e-05	up
CM vs HM	4 - Mono	4a - CD14+ Mono	NFXL1	1.73939e-09	0.0921368	0.058	0.022	3.77066e-05	up
CM vs HM	4 - Mono	4a - CD14+ Mono	SPINT2	1.79594e-09	0.135015	0.298	0.206	3.89323e-05	up
CM vs HM	4 - Mono	4a - CD14+ Mono	BAZ1A	1.97099e-09	0.123966	0.338	0.239	4.27272e-05	up
CM vs HM	4 - Mono	4a - CD14+ Mono	PILRA	1.97205e-09	-0.253282	0.583	0.603	4.275e-05	down
CM vs HM	4 - Mono	4a - CD14+ Mono	LERFS	2.04464e-09	-0.0419204	0	0.013	4.43238e-05	down
CM vs HM	4 - Mono	4a - CD14+ Mono	AL138963.4	2.07519e-09	-0.108475	0.02	0.052	4.49859e-05	down
CM vs HM	4 - Mono	4a - CD14+ Mono	IL32	2.10028e-09	0.0809257	0.033	0.007	4.55299e-05	up
CM vs HM	4 - Mono	4a - CD14+ Mono	HNRNPK	2.1246e-09	-0.188707	0.731	0.731	4.6057e-05	down
CM vs HM	4 - Mono	4a - CD14+ Mono	MYO5A	2.12828e-09	0.130488	0.208	0.134	4.61368e-05	up
CM vs HM	4 - Mono	4a - CD14+ Mono	PSMD7	2.13144e-09	0.136163	0.43	0.318	4.62053e-05	up
CM vs HM	4 - Mono	4a - CD14+ Mono	TRIOBP	2.16708e-09	0.133837	0.265	0.18	4.69781e-05	up
CM vs HM	4 - Mono	4a - CD14+ Mono	CAPZA1	2.18801e-09	0.180086	0.514	0.408	4.74317e-05	up
CM vs HM	4 - Mono	4a - CD14+ Mono	CST7	2.2288e-09	0.122349	0.048	0.016	4.83158e-05	up
CM vs HM	4 - Mono	4a - CD14+ Mono	TPST2	2.24503e-09	0.145091	0.261	0.177	4.86678e-05	up
CM vs HM	4 - Mono	4a - CD14+ Mono	NSUN2	2.30981e-09	0.10665	0.12	0.066	5.00721e-05	up
CM vs HM	4 - Mono	4a - CD14+ Mono	NGLY1	2.32545e-09	0.0945693	0.126	0.07	5.04111e-05	up
CM vs HM	4 - Mono	4a - CD14+ Mono	TMED3	2.44253e-09	0.0817343	0.138	0.079	5.29491e-05	up
CM vs HM	4 - Mono	4a - CD14+ Mono	RSRC1	2.47396e-09	0.130456	0.17	0.104	5.36306e-05	up
CM vs HM	4 - Mono	4a - CD14+ Mono	TRPC4AP	2.489e-09	0.0883908	0.201	0.128	5.39565e-05	up
CM vs HM	4 - Mono	4a - CD14+ Mono	D2HGDH	2.55268e-09	0.0810989	0.063	0.026	5.53369e-05	up
CM vs HM	4 - Mono	4a - CD14+ Mono	RRP7A	2.62308e-09	0.151964	0.297	0.208	5.68631e-05	up
CM vs HM	4 - Mono	4a - CD14+ Mono	ETF1	2.62428e-09	0.13225	0.278	0.192	5.68892e-05	up
CM vs HM	4 - Mono	4a - CD14+ Mono	SRGAP2	2.64254e-09	0.105848	0.229	0.15	5.7285e-05	up
CM vs HM	4 - Mono	4a - CD14+ Mono	STAM	2.67685e-09	0.0841025	0.09	0.044	5.80287e-05	up
CM vs HM	4 - Mono	4a - CD14+ Mono	CD86	2.67752e-09	-0.233128	0.304	0.36	5.80432e-05	down
CM vs HM	4 - Mono	4a - CD14+ Mono	SIPA1	2.70015e-09	0.148171	0.257	0.175	5.85338e-05	up
CM vs HM	4 - Mono	4a - CD14+ Mono	SERTAD2	2.71005e-09	0.114239	0.255	0.172	5.87484e-05	up
CM vs HM	4 - Mono	4a - CD14+ Mono	CTSS	2.74089e-09	-0.0957087	0.986	0.995	5.9417e-05	down
CM vs HM	4 - Mono	4a - CD14+ Mono	SEC61G	2.76048e-09	0.154454	0.635	0.512	5.98417e-05	up
CM vs HM	4 - Mono	4a - CD14+ Mono	SVBP	2.76372e-09	0.10267	0.254	0.168	5.99119e-05	up
CM vs HM	4 - Mono	4a - CD14+ Mono	TNFSF13B	2.82093e-09	-0.248243	0.68	0.695	6.1152e-05	down
CM vs HM	4 - Mono	4a - CD14+ Mono	2024-03-01	3.03612e-09	0.141313	0.119	0.066	6.58169e-05	up
CM vs HM	4 - Mono	4a - CD14+ Mono	GFER	3.09932e-09	0.0862692	0.076	0.035	6.71871e-05	up
CM vs HM	4 - Mono	4a - CD14+ Mono	USP34	3.11764e-09	0.128785	0.254	0.17	6.75842e-05	up
CM vs HM	4 - Mono	4a - CD14+ Mono	JAK1	3.12454e-09	0.146488	0.397	0.294	6.77339e-05	up
CM vs HM	4 - Mono	4a - CD14+ Mono	NHP2	3.12943e-09	-0.221505	0.275	0.328	6.78399e-05	down
CM vs HM	4 - Mono	4a - CD14+ Mono	ALOX5	3.13154e-09	0.155577	0.505	0.395	6.78855e-05	up
CM vs HM	4 - Mono	4a - CD14+ Mono	F5	3.16535e-09	0.126068	0.16	0.097	6.86185e-05	up
CM vs HM	4 - Mono	4a - CD14+ Mono	RPS26	3.17981e-09	-0.0931477	0.982	0.987	6.89319e-05	down
CM vs HM	4 - Mono	4a - CD14+ Mono	MFSD3	3.25639e-09	0.0603419	0.043	0.013	7.05921e-05	up
CM vs HM	4 - Mono	4a - CD14+ Mono	CCDC112	3.36686e-09	0.106557	0.092	0.046	7.29868e-05	up
CM vs HM	4 - Mono	4a - CD14+ Mono	NAA50	3.39566e-09	0.121413	0.199	0.127	7.3611e-05	up
CM vs HM	4 - Mono	4a - CD14+ Mono	GARS	3.47356e-09	0.0945699	0.167	0.101	7.52999e-05	up
CM vs HM	4 - Mono	4a - CD14+ Mono	MARK2	3.51239e-09	0.10151	0.161	0.096	7.61416e-05	up
CM vs HM	4 - Mono	4a - CD14+ Mono	SNHG32	3.51321e-09	-0.236147	0.172	0.226	7.61594e-05	down
CM vs HM	4 - Mono	4a - CD14+ Mono	EXOSC4	3.5339e-09	0.106494	0.173	0.106	7.66078e-05	up
CM vs HM	4 - Mono	4a - CD14+ Mono	ZNF672	3.58107e-09	0.0907583	0.112	0.06	7.76304e-05	up
CM vs HM	4 - Mono	4a - CD14+ Mono	OXSR1	3.67573e-09	0.114184	0.137	0.08	7.96824e-05	up
CM vs HM	4 - Mono	4a - CD14+ Mono	IGF2R	3.69174e-09	0.148892	0.281	0.193	8.00294e-05	up
CM vs HM	4 - Mono	4a - CD14+ Mono	SCAF11	3.70167e-09	0.165234	0.538	0.427	8.02448e-05	up
CM vs HM	4 - Mono	4a - CD14+ Mono	TBC1D1	3.73357e-09	0.114309	0.221	0.144	8.09364e-05	up
CM vs HM	4 - Mono	4a - CD14+ Mono	WIPI1	3.74008e-09	0.104627	0.096	0.049	8.10774e-05	up
CM vs HM	4 - Mono	4a - CD14+ Mono	HDGFL2	3.78119e-09	0.0712444	0.059	0.023	8.19686e-05	up
CM vs HM	4 - Mono	4a - CD14+ Mono	TUT4	3.87954e-09	0.1233	0.105	0.056	8.41007e-05	up
CM vs HM	4 - Mono	4a - CD14+ Mono	NOA1	4.0644e-09	0.105971	0.132	0.076	8.8108e-05	up
CM vs HM	4 - Mono	4a - CD14+ Mono	SYNRG	4.15702e-09	0.129554	0.163	0.1	9.01158e-05	up
CM vs HM	4 - Mono	4a - CD14+ Mono	VAMP2	4.16217e-09	0.155183	0.475	0.363	9.02275e-05	up
CM vs HM	4 - Mono	4a - CD14+ Mono	IGLV2-18	4.17261e-09	-0.0469774	0	0.012	9.04539e-05	down
CM vs HM	4 - Mono	4a - CD14+ Mono	AL121933.2	4.19213e-09	0.106664	0.125	0.07	9.08771e-05	up
CM vs HM	4 - Mono	4a - CD14+ Mono	ZNF83	4.19721e-09	0.111045	0.081	0.039	9.09872e-05	up
CM vs HM	4 - Mono	4a - CD14+ Mono	SLC16A7	4.24198e-09	0.116101	0.099	0.052	9.19577e-05	up
CM vs HM	4 - Mono	4a - CD14+ Mono	FUS	4.26457e-09	0.175184	0.559	0.446	9.24473e-05	up
CM vs HM	4 - Mono	4a - CD14+ Mono	DUS3L	4.36e-09	0.0881151	0.105	0.055	9.45161e-05	up
CM vs HM	4 - Mono	4a - CD14+ Mono	CASC8	4.43135e-09	-0.0819418	0.003	0.021	9.60628e-05	down
CM vs HM	4 - Mono	4a - CD14+ Mono	SLC22A18	4.4417e-09	0.0824837	0.115	0.063	9.62872e-05	up
CM vs HM	4 - Mono	4a - CD14+ Mono	ATP5MG	4.46438e-09	-0.128073	0.943	0.959	9.67788e-05	down
CM vs HM	4 - Mono	4a - CD14+ Mono	FOSL1	4.58667e-09	0.0679528	0.03	0.006	9.94298e-05	up
CM vs HM	4 - Mono	4a - CD14+ Mono	CFLAR	4.64156e-09	0.173246	0.569	0.455	0.00010062	up
CM vs HM	4 - Mono	4a - CD14+ Mono	AC018755.4	4.6599e-09	0.0742728	0.044	0.014	0.000101017	up
CM vs HM	4 - Mono	4a - CD14+ Mono	MAU2	4.69501e-09	0.0916888	0.147	0.086	0.000101779	up
CM vs HM	4 - Mono	4a - CD14+ Mono	SMS	4.75899e-09	0.143483	0.334	0.237	0.000103165	up
CM vs HM	4 - Mono	4a - CD14+ Mono	AP1AR	4.81076e-09	0.103867	0.098	0.051	0.000104288	up
CM vs HM	4 - Mono	4a - CD14+ Mono	NUCB1	4.8854e-09	-0.233118	0.474	0.506	0.000105906	down
CM vs HM	4 - Mono	4a - CD14+ Mono	SNX6	5.04626e-09	0.189717	0.468	0.367	0.000109393	up
CM vs HM	4 - Mono	4a - CD14+ Mono	SPATC1L	5.08259e-09	0.0606783	0.06	0.024	0.00011018	up
CM vs HM	4 - Mono	4a - CD14+ Mono	TRIM52-AS1	5.44429e-09	0.0895241	0.074	0.034	0.000118021	up
CM vs HM	4 - Mono	4a - CD14+ Mono	FPGS	5.45473e-09	0.108424	0.1	0.052	0.000118248	up
CM vs HM	4 - Mono	4a - CD14+ Mono	DCP2	5.47062e-09	0.13529	0.377	0.273	0.000118592	up
CM vs HM	4 - Mono	4a - CD14+ Mono	SHFL	5.47557e-09	0.107327	0.184	0.116	0.0001187	up
CM vs HM	4 - Mono	4a - CD14+ Mono	MMP25	5.60939e-09	0.0935142	0.056	0.022	0.0001216	up
CM vs HM	4 - Mono	4a - CD14+ Mono	ZBTB45	5.69842e-09	0.0687026	0.043	0.013	0.00012353	up
CM vs HM	4 - Mono	4a - CD14+ Mono	PSMD8	5.86586e-09	0.132039	0.47	0.357	0.00012716	up
CM vs HM	4 - Mono	4a - CD14+ Mono	RUNX1	5.96193e-09	0.134051	0.16	0.098	0.000129243	up
CM vs HM	4 - Mono	4a - CD14+ Mono	SMDT1	5.98515e-09	0.0955073	0.593	0.465	0.000129746	up
CM vs HM	4 - Mono	4a - CD14+ Mono	LPCAT2	5.99439e-09	0.134831	0.166	0.104	0.000129946	up
CM vs HM	4 - Mono	4a - CD14+ Mono	NAPG	6.04941e-09	0.0936324	0.138	0.08	0.000131139	up
CM vs HM	4 - Mono	4a - CD14+ Mono	WRAP73	6.08211e-09	0.0882407	0.103	0.054	0.000131848	up
CM vs HM	4 - Mono	4a - CD14+ Mono	FYTTD1	6.40734e-09	0.130342	0.205	0.134	0.000138898	up
CM vs HM	4 - Mono	4a - CD14+ Mono	KCTD13	6.43047e-09	0.0648332	0.07	0.031	0.0001394	up
CM vs HM	4 - Mono	4a - CD14+ Mono	SURF1	6.60454e-09	0.107149	0.132	0.076	0.000143173	up
CM vs HM	4 - Mono	4a - CD14+ Mono	CD83	6.62878e-09	-0.216385	0.212	0.275	0.000143699	down
CM vs HM	4 - Mono	4a - CD14+ Mono	SPECC1	6.69469e-09	0.157847	0.287	0.202	0.000145128	up
CM vs HM	4 - Mono	4a - CD14+ Mono	FP236383.5	6.77954e-09	-0.128324	0.026	0.058	0.000146967	down
CM vs HM	4 - Mono	4a - CD14+ Mono	UGP2	6.86873e-09	0.146515	0.243	0.165	0.0001489	up
CM vs HM	4 - Mono	4a - CD14+ Mono	PFKL	7.04882e-09	0.150648	0.339	0.243	0.000152804	up
CM vs HM	4 - Mono	4a - CD14+ Mono	SYK	7.15759e-09	0.153815	0.612	0.494	0.000155162	up
CM vs HM	4 - Mono	4a - CD14+ Mono	PIGBOS1	7.20269e-09	0.116949	0.271	0.186	0.00015614	up
CM vs HM	4 - Mono	4a - CD14+ Mono	MTRNR2L8	7.28377e-09	-0.0536942	0.004	0.023	0.000157897	down
CM vs HM	4 - Mono	4a - CD14+ Mono	MBOAT7	7.3429e-09	0.13205	0.325	0.231	0.000159179	up
CM vs HM	4 - Mono	4a - CD14+ Mono	ZNF770	7.41888e-09	0.115694	0.115	0.064	0.000160826	up
CM vs HM	4 - Mono	4a - CD14+ Mono	SERGEF	7.42345e-09	0.0647838	0.079	0.038	0.000160925	up
CM vs HM	4 - Mono	4a - CD14+ Mono	CCL5	7.42598e-09	0.168007	0.188	0.121	0.00016098	up
CM vs HM	4 - Mono	4a - CD14+ Mono	ARL4A	7.44164e-09	0.119636	0.244	0.164	0.00016132	up
CM vs HM	4 - Mono	4a - CD14+ Mono	SECTM1	7.54811e-09	0.0997768	0.116	0.065	0.000163628	up
CM vs HM	4 - Mono	4a - CD14+ Mono	MGAT4B	7.85255e-09	0.0752727	0.043	0.014	0.000170228	up
CM vs HM	4 - Mono	4a - CD14+ Mono	PSME1	7.90334e-09	-0.190486	0.794	0.803	0.000171329	down
CM vs HM	4 - Mono	4a - CD14+ Mono	SVIL	7.97676e-09	0.104394	0.122	0.069	0.00017292	up
CM vs HM	4 - Mono	4a - CD14+ Mono	COG8	8.11344e-09	0.0813447	0.055	0.021	0.000175883	up
CM vs HM	4 - Mono	4a - CD14+ Mono	ITPK1	8.25732e-09	0.113004	0.242	0.162	0.000179002	up
CM vs HM	4 - Mono	4a - CD14+ Mono	RPUSD3	8.33093e-09	0.0897543	0.169	0.104	0.000180598	up
CM vs HM	4 - Mono	4a - CD14+ Mono	USP53	8.59603e-09	-0.0557492	0.002	0.018	0.000186345	down
CM vs HM	4 - Mono	4a - CD14+ Mono	LRRC59	8.74243e-09	0.100497	0.276	0.187	0.000189518	up
CM vs HM	4 - Mono	4a - CD14+ Mono	CDKN2B	8.9727e-09	0.0869044	0.054	0.021	0.00019451	up
CM vs HM	4 - Mono	4a - CD14+ Mono	ABHD13	9.13818e-09	0.0873394	0.115	0.064	0.000198097	up
CM vs HM	4 - Mono	4a - CD14+ Mono	B4GALT1	9.18284e-09	0.103161	0.235	0.156	0.000199066	up
CM vs HM	4 - Mono	4a - CD14+ Mono	NBPF9	9.30287e-09	0.0806395	0.083	0.04	0.000201668	up
CM vs HM	4 - Mono	4a - CD14+ Mono	YIPF4	9.33948e-09	0.131837	0.203	0.132	0.000202461	up
CM vs HM	4 - Mono	4a - CD14+ Mono	MRI1	9.40457e-09	0.0671849	0.076	0.036	0.000203872	up
CM vs HM	4 - Mono	4a - CD14+ Mono	DRAM1	9.42842e-09	0.0832164	0.106	0.057	0.000204389	up
CM vs HM	4 - Mono	4a - CD14+ Mono	FBXL8	9.45397e-09	0.0687129	0.034	0.009	0.000204943	up
CM vs HM	4 - Mono	4a - CD14+ Mono	JAK2	9.58351e-09	0.134219	0.262	0.182	0.000207751	up
CM vs HM	4 - Mono	4a - CD14+ Mono	SNRPD2	9.6989e-09	-0.18076	0.69	0.716	0.000210253	down
CM vs HM	4 - Mono	4a - CD14+ Mono	GNG10	9.72986e-09	0.137782	0.527	0.417	0.000210924	up
CM vs HM	4 - Mono	4a - CD14+ Mono	HSDL2	1.00627e-08	0.0958102	0.145	0.087	0.000218138	up
CM vs HM	4 - Mono	4a - CD14+ Mono	RALB	1.01565e-08	0.102858	0.282	0.196	0.000220174	up
CM vs HM	4 - Mono	4a - CD14+ Mono	GUSB	1.05362e-08	0.0854508	0.245	0.162	0.000228403	up
CM vs HM	4 - Mono	4a - CD14+ Mono	ANP32E	1.06424e-08	0.12263	0.183	0.117	0.000230706	up
CM vs HM	4 - Mono	4a - CD14+ Mono	LRP1	1.09163e-08	0.189329	0.733	0.657	0.000236644	up
CM vs HM	4 - Mono	4a - CD14+ Mono	SMNDC1	1.10045e-08	0.152031	0.249	0.171	0.000238556	up
CM vs HM	4 - Mono	4a - CD14+ Mono	IQGAP2	1.10911e-08	0.129026	0.326	0.233	0.000240432	up
CM vs HM	4 - Mono	4a - CD14+ Mono	ITGA4	1.16368e-08	-0.253942	0.477	0.516	0.000252263	down
CM vs HM	4 - Mono	4a - CD14+ Mono	PAG1	1.16548e-08	0.105565	0.185	0.118	0.000252652	up
CM vs HM	4 - Mono	4a - CD14+ Mono	CDKN2D	1.17965e-08	0.130271	0.211	0.139	0.000255725	up
CM vs HM	4 - Mono	4a - CD14+ Mono	TMF1	1.18656e-08	0.124762	0.27	0.187	0.000257223	up
CM vs HM	4 - Mono	4a - CD14+ Mono	MIIP	1.19793e-08	-0.265081	0.253	0.301	0.000259688	down
CM vs HM	4 - Mono	4a - CD14+ Mono	CCDC186	1.20628e-08	0.127125	0.129	0.076	0.000261497	up
CM vs HM	4 - Mono	4a - CD14+ Mono	CD4	1.22988e-08	-0.195437	0.466	0.507	0.000266614	down
CM vs HM	4 - Mono	4a - CD14+ Mono	UNC13D	1.25752e-08	0.119323	0.259	0.178	0.000272605	up
CM vs HM	4 - Mono	4a - CD14+ Mono	SOCS4	1.28803e-08	0.0994736	0.078	0.038	0.000279219	up
CM vs HM	4 - Mono	4a - CD14+ Mono	SSR4	1.28915e-08	-0.16926	0.734	0.753	0.000279461	down
CM vs HM	4 - Mono	4a - CD14+ Mono	KCNE3	1.30095e-08	0.14734	0.411	0.312	0.00028202	up
CM vs HM	4 - Mono	4a - CD14+ Mono	IER3	1.32758e-08	0.259991	0.279	0.202	0.000287793	up
CM vs HM	4 - Mono	4a - CD14+ Mono	TMEM191B	1.34049e-08	0.0639354	0.031	0.007	0.000290592	up
CM vs HM	4 - Mono	4a - CD14+ Mono	UBQLN2	1.34681e-08	0.0809592	0.149	0.09	0.000291962	up
CM vs HM	4 - Mono	4a - CD14+ Mono	SRSF4	1.3542e-08	0.1159	0.325	0.233	0.000293564	up
CM vs HM	4 - Mono	4a - CD14+ Mono	RDX	1.36168e-08	0.0793364	0.113	0.063	0.000295186	up
CM vs HM	4 - Mono	4a - CD14+ Mono	CRAT	1.45192e-08	0.100563	0.101	0.054	0.000314746	up
CM vs HM	4 - Mono	4a - CD14+ Mono	USP1	1.4752e-08	0.1068	0.17	0.107	0.000319793	up
CM vs HM	4 - Mono	4a - CD14+ Mono	RASA2	1.47743e-08	0.0962428	0.101	0.054	0.000320278	up
CM vs HM	4 - Mono	4a - CD14+ Mono	CCDC106	1.50191e-08	0.0460085	0.028	0.005	0.000325584	up
CM vs HM	4 - Mono	4a - CD14+ Mono	MMD	1.50666e-08	0.0790603	0.037	0.011	0.000326613	up
CM vs HM	4 - Mono	4a - CD14+ Mono	ATRX	1.52645e-08	0.148593	0.385	0.291	0.000330904	up
CM vs HM	4 - Mono	4a - CD14+ Mono	C11orf54	1.55066e-08	0.0807611	0.093	0.048	0.000336151	up
CM vs HM	4 - Mono	4a - CD14+ Mono	HNRNPM	1.56931e-08	0.132751	0.466	0.357	0.000340194	up
CM vs HM	4 - Mono	4a - CD14+ Mono	RPL38	1.57616e-08	-0.185149	0.838	0.83	0.00034168	down
CM vs HM	4 - Mono	4a - CD14+ Mono	METTL23	1.57849e-08	0.101596	0.143	0.086	0.000342186	up
CM vs HM	4 - Mono	4a - CD14+ Mono	RAB8B	1.63169e-08	0.141222	0.261	0.181	0.000353718	up
CM vs HM	4 - Mono	4a - CD14+ Mono	GLIPR2	1.71089e-08	0.141644	0.727	0.623	0.000370887	up
CM vs HM	4 - Mono	4a - CD14+ Mono	DDRGK1	1.77374e-08	0.0898499	0.259	0.177	0.000384512	up
CM vs HM	4 - Mono	4a - CD14+ Mono	DNAJA2	1.82479e-08	0.0950981	0.353	0.253	0.000395578	up
CM vs HM	4 - Mono	4a - CD14+ Mono	ADPRHL2	1.84206e-08	0.0826223	0.088	0.044	0.000399322	up
CM vs HM	4 - Mono	4a - CD14+ Mono	NDUFS1	1.86192e-08	0.10268	0.153	0.094	0.000403627	up
CM vs HM	4 - Mono	4a - CD14+ Mono	IMPA2	1.87655e-08	0.113222	0.158	0.098	0.000406799	up
CM vs HM	4 - Mono	4a - CD14+ Mono	TNKS	1.90007e-08	0.087447	0.078	0.038	0.000411897	up
CM vs HM	4 - Mono	4a - CD14+ Mono	AL355001.2	1.91513e-08	0.0568573	0.036	0.01	0.000415162	up
CM vs HM	4 - Mono	4a - CD14+ Mono	POLD4	1.92278e-08	0.176688	0.679	0.586	0.00041682	up
CM vs HM	4 - Mono	4a - CD14+ Mono	GMFG	1.93996e-08	0.130358	0.926	0.903	0.000420544	up
CM vs HM	4 - Mono	4a - CD14+ Mono	HIVEP3	1.9465e-08	0.0966182	0.099	0.053	0.000421962	up
CM vs HM	4 - Mono	4a - CD14+ Mono	NDUFB9	1.94826e-08	0.197394	0.735	0.654	0.000422343	up
CM vs HM	4 - Mono	4a - CD14+ Mono	BCL10	1.98795e-08	0.0888564	0.212	0.14	0.000430948	up
CM vs HM	4 - Mono	4a - CD14+ Mono	IQGAP1	2.03521e-08	0.144942	0.773	0.684	0.000441193	up
CM vs HM	4 - Mono	4a - CD14+ Mono	PLIN3	2.04974e-08	0.170344	0.463	0.36	0.000444342	up
CM vs HM	4 - Mono	4a - CD14+ Mono	ACSL3	2.05711e-08	0.0740461	0.102	0.055	0.00044594	up
CM vs HM	4 - Mono	4a - CD14+ Mono	KRT10	2.09389e-08	0.106629	0.075	0.036	0.000453914	up
CM vs HM	4 - Mono	4a - CD14+ Mono	RIT1	2.11691e-08	0.118824	0.214	0.142	0.000458904	up
CM vs HM	4 - Mono	4a - CD14+ Mono	LCORL	2.12938e-08	0.103763	0.089	0.045	0.000461607	up
CM vs HM	4 - Mono	4a - CD14+ Mono	SENP5	2.15568e-08	0.0889467	0.086	0.043	0.000467307	up
CM vs HM	4 - Mono	4a - CD14+ Mono	U2AF1L5	2.16032e-08	0.0538944	0.019	0.001	0.000468313	up
CM vs HM	4 - Mono	4a - CD14+ Mono	IMPA1	2.17963e-08	0.09195	0.066	0.03	0.000472501	up
CM vs HM	4 - Mono	4a - CD14+ Mono	THEMIS2	2.22699e-08	0.171668	0.673	0.579	0.000482767	up
CM vs HM	4 - Mono	4a - CD14+ Mono	MAP1S	2.26948e-08	0.105382	0.128	0.075	0.000491978	up
CM vs HM	4 - Mono	4a - CD14+ Mono	RBM25	2.30776e-08	0.129629	0.466	0.356	0.000500277	up
CM vs HM	4 - Mono	4a - CD14+ Mono	SRSF2	2.33363e-08	0.142537	0.39	0.29	0.000505884	up
CM vs HM	4 - Mono	4a - CD14+ Mono	MTF1	2.3494e-08	0.102586	0.222	0.149	0.000509304	up
CM vs HM	4 - Mono	4a - CD14+ Mono	NHSL2	2.35276e-08	0.098113	0.232	0.157	0.000510031	up
CM vs HM	4 - Mono	4a - CD14+ Mono	GPRIN3	2.37522e-08	0.103017	0.082	0.041	0.0005149	up
CM vs HM	4 - Mono	4a - CD14+ Mono	OPLAH	2.48604e-08	0.065233	0.032	0.008	0.000538925	up
CM vs HM	4 - Mono	4a - CD14+ Mono	RABL6	2.48834e-08	0.118929	0.177	0.113	0.000539422	up
CM vs HM	4 - Mono	4a - CD14+ Mono	SLC40A1	2.48924e-08	0.0945782	0.142	0.086	0.000539617	up
CM vs HM	4 - Mono	4a - CD14+ Mono	PLPBP	2.58255e-08	0.093319	0.203	0.133	0.000559845	up
CM vs HM	4 - Mono	4a - CD14+ Mono	AP3B1	2.60692e-08	0.132558	0.255	0.177	0.000565128	up
CM vs HM	4 - Mono	4a - CD14+ Mono	SMC1A	2.64167e-08	0.109961	0.315	0.226	0.00057266	up
CM vs HM	4 - Mono	4a - CD14+ Mono	ARHGAP35	2.67439e-08	0.10281	0.091	0.048	0.000579755	up
CM vs HM	4 - Mono	4a - CD14+ Mono	SNF8	2.69653e-08	0.0787697	0.14	0.083	0.000584554	up
CM vs HM	4 - Mono	4a - CD14+ Mono	UPP1	2.70799e-08	0.193226	0.469	0.366	0.000587039	up
CM vs HM	4 - Mono	4a - CD14+ Mono	SLC16A5	2.76103e-08	0.0760024	0.078	0.038	0.000598536	up
CM vs HM	4 - Mono	4a - CD14+ Mono	GOLGB1	2.77631e-08	0.133219	0.254	0.174	0.000601847	up
CM vs HM	4 - Mono	4a - CD14+ Mono	ROMO1	2.81549e-08	0.139982	0.551	0.436	0.000610341	up
CM vs HM	4 - Mono	4a - CD14+ Mono	ATP6V0B	2.84815e-08	0.156365	0.846	0.783	0.000617421	up
CM vs HM	4 - Mono	4a - CD14+ Mono	HOXB2	2.86231e-08	0.056306	0.034	0.009	0.000620492	up
CM vs HM	4 - Mono	4a - CD14+ Mono	TFG	2.86679e-08	0.0731394	0.137	0.082	0.000621463	up
CM vs HM	4 - Mono	4a - CD14+ Mono	BRI3BP	2.91407e-08	0.0959305	0.117	0.068	0.000631713	up
CM vs HM	4 - Mono	4a - CD14+ Mono	MAST3	2.91953e-08	0.10696	0.185	0.12	0.000632895	up
CM vs HM	4 - Mono	4a - CD14+ Mono	G3BP1	2.94385e-08	0.0992285	0.203	0.133	0.000638169	up
CM vs HM	4 - Mono	4a - CD14+ Mono	PCYT1A	2.99534e-08	0.0875373	0.212	0.141	0.00064933	up
CM vs HM	4 - Mono	4a - CD14+ Mono	SPAG9	3.13923e-08	0.123359	0.158	0.099	0.000680522	up
CM vs HM	4 - Mono	4a - CD14+ Mono	ITPRIPL2	3.16015e-08	0.0866586	0.099	0.054	0.000685057	up
CM vs HM	4 - Mono	4a - CD14+ Mono	MICAL1	3.16563e-08	0.13717	0.253	0.176	0.000686245	up
CM vs HM	4 - Mono	4a - CD14+ Mono	EIF2AK4	3.25013e-08	0.106903	0.143	0.088	0.000704564	up
CM vs HM	4 - Mono	4a - CD14+ Mono	CASC4	3.25481e-08	0.110092	0.182	0.119	0.000705577	up
CM vs HM	4 - Mono	4a - CD14+ Mono	UBA1	3.26727e-08	0.170987	0.414	0.317	0.000708278	up
CM vs HM	4 - Mono	4a - CD14+ Mono	MFSD10	3.26848e-08	0.109146	0.281	0.198	0.00070854	up
CM vs HM	4 - Mono	4a - CD14+ Mono	NID1	3.29648e-08	0.0881056	0.062	0.027	0.00071461	up
CM vs HM	4 - Mono	4a - CD14+ Mono	RTF2	3.30993e-08	0.146606	0.437	0.331	0.000717527	up
CM vs HM	4 - Mono	4a - CD14+ Mono	MTMR3	3.35323e-08	0.119017	0.229	0.155	0.000726912	up
CM vs HM	4 - Mono	4a - CD14+ Mono	PLAGL2	3.36463e-08	0.101377	0.165	0.104	0.000729384	up
CM vs HM	4 - Mono	4a - CD14+ Mono	ENOPH1	3.38883e-08	0.0727907	0.074	0.036	0.000734631	up
CM vs HM	4 - Mono	4a - CD14+ Mono	AC078846.1	3.44133e-08	0.0689774	0.041	0.013	0.000746011	up
CM vs HM	4 - Mono	4a - CD14+ Mono	AC064805.1	3.44784e-08	-0.144354	0.038	0.073	0.000747422	down
CM vs HM	4 - Mono	4a - CD14+ Mono	WASL	3.64309e-08	0.0979937	0.136	0.082	0.000789749	up
CM vs HM	4 - Mono	4a - CD14+ Mono	MTMR6	3.65744e-08	0.143559	0.159	0.1	0.000792859	up
CM vs HM	4 - Mono	4a - CD14+ Mono	EHBP1L1	3.78103e-08	0.101861	0.161	0.101	0.000819652	up
CM vs HM	4 - Mono	4a - CD14+ Mono	CBL	3.79241e-08	0.127211	0.255	0.176	0.000822118	up
CM vs HM	4 - Mono	4a - CD14+ Mono	AKAP13	3.79534e-08	0.164784	0.686	0.584	0.000822753	up
CM vs HM	4 - Mono	4a - CD14+ Mono	HK1	3.79945e-08	0.109464	0.386	0.285	0.000823644	up
CM vs HM	4 - Mono	4a - CD14+ Mono	CTSC	3.83094e-08	-0.276542	0.385	0.42	0.000830472	down
CM vs HM	4 - Mono	4a - CD14+ Mono	IVD	3.85578e-08	0.110943	0.134	0.081	0.000835856	up
CM vs HM	4 - Mono	4a - CD14+ Mono	IDH1	3.85733e-08	0.114067	0.211	0.141	0.000836191	up
CM vs HM	4 - Mono	4a - CD14+ Mono	WARS	3.88086e-08	-0.283769	0.41	0.443	0.000841294	down
CM vs HM	4 - Mono	4a - CD14+ Mono	ZSWIM7	3.97197e-08	0.111289	0.263	0.182	0.000861044	up
CM vs HM	4 - Mono	4a - CD14+ Mono	RALGPS2	4.00741e-08	0.0854543	0.051	0.02	0.000868726	up
CM vs HM	4 - Mono	4a - CD14+ Mono	SF3A1	4.10064e-08	0.132679	0.296	0.212	0.000888936	up
CM vs HM	4 - Mono	4a - CD14+ Mono	ARHGEF40	4.10204e-08	0.139798	0.295	0.21	0.000889239	up
CM vs HM	4 - Mono	4a - CD14+ Mono	PCM1	4.19167e-08	0.14622	0.298	0.214	0.00090867	up
CM vs HM	4 - Mono	4a - CD14+ Mono	RIF1	4.21313e-08	0.106161	0.16	0.101	0.000913322	up
CM vs HM	4 - Mono	4a - CD14+ Mono	ANTKMT	4.21881e-08	0.059943	0.042	0.014	0.000914553	up
CM vs HM	4 - Mono	4a - CD14+ Mono	KLF4	4.22733e-08	0.162457	0.591	0.489	0.0009164	up
CM vs HM	4 - Mono	4a - CD14+ Mono	SYNE3	4.32127e-08	0.130765	0.161	0.102	0.000936765	up
CM vs HM	4 - Mono	4a - CD14+ Mono	PRICKLE3	4.34355e-08	0.0595033	0.062	0.027	0.000941595	up
CM vs HM	4 - Mono	4a - CD14+ Mono	WDR18	4.45627e-08	0.0812701	0.126	0.074	0.00096603	up
CM vs HM	4 - Mono	4a - CD14+ Mono	FAM210A	4.54265e-08	0.0589998	0.047	0.018	0.000984757	up
CM vs HM	4 - Mono	4a - CD14+ Mono	EIF3G	4.66146e-08	-0.173936	0.777	0.775	0.00101051	down
CM vs HM	4 - Mono	4a - CD14+ Mono	NBPF1	4.67277e-08	0.0515486	0.04	0.013	0.00101296	up
CM vs HM	4 - Mono	4a - CD14+ Mono	NAXE	4.69299e-08	0.0618026	0.139	0.083	0.00101735	up
CM vs HM	4 - Mono	4a - CD14+ Mono	RAB20	4.77524e-08	0.132097	0.172	0.111	0.00103518	up
CM vs HM	4 - Mono	4a - CD14+ Mono	MZF1	4.79749e-08	0.0942882	0.078	0.039	0.00104	up
CM vs HM	4 - Mono	4a - CD14+ Mono	MGST2	4.86295e-08	-0.238408	0.232	0.28	0.00105419	down
CM vs HM	4 - Mono	4a - CD14+ Mono	PPP1R10	4.87307e-08	0.0888192	0.276	0.194	0.00105638	up
CM vs HM	4 - Mono	4a - CD14+ Mono	SEPTIN10	4.88624e-08	0.0706507	0.049	0.019	0.00105924	up
CM vs HM	4 - Mono	4a - CD14+ Mono	ARCN1	4.94467e-08	0.10801	0.244	0.167	0.00107191	up
CM vs HM	4 - Mono	4a - CD14+ Mono	ZFR	4.99643e-08	0.103664	0.239	0.163	0.00108313	up
CM vs HM	4 - Mono	4a - CD14+ Mono	GLTP	5.01249e-08	0.117	0.266	0.187	0.00108661	up
CM vs HM	4 - Mono	4a - CD14+ Mono	HDAC5	5.04005e-08	0.0972452	0.173	0.111	0.00109258	up
CM vs HM	4 - Mono	4a - CD14+ Mono	BAZ2B	5.08706e-08	0.131614	0.321	0.235	0.00110277	up
CM vs HM	4 - Mono	4a - CD14+ Mono	CCDC47	5.10655e-08	0.118918	0.187	0.123	0.001107	up
CM vs HM	4 - Mono	4a - CD14+ Mono	ZZEF1	5.11403e-08	0.113664	0.178	0.116	0.00110862	up
CM vs HM	4 - Mono	4a - CD14+ Mono	UQCRH	5.19257e-08	-0.167441	0.828	0.829	0.00112565	down
CM vs HM	4 - Mono	4a - CD14+ Mono	GLRX	5.26241e-08	-0.189268	0.774	0.772	0.00114078	down
CM vs HM	4 - Mono	4a - CD14+ Mono	CCNK	5.3325e-08	0.10882	0.223	0.151	0.00115598	up
CM vs HM	4 - Mono	4a - CD14+ Mono	CHD4	5.43672e-08	0.146097	0.352	0.261	0.00117857	up
CM vs HM	4 - Mono	4a - CD14+ Mono	IL27RA	5.44489e-08	0.123281	0.219	0.149	0.00118034	up
CM vs HM	4 - Mono	4a - CD14+ Mono	ZBTB7B	5.46979e-08	0.092224	0.221	0.149	0.00118574	up
CM vs HM	4 - Mono	4a - CD14+ Mono	RAB4B	5.4791e-08	0.106604	0.231	0.157	0.00118776	up
CM vs HM	4 - Mono	4a - CD14+ Mono	NUDT19	5.79864e-08	0.059698	0.052	0.021	0.00125703	up
CM vs HM	4 - Mono	4a - CD14+ Mono	RASA4B	5.97391e-08	0.0554562	0.032	0.008	0.00129502	up
CM vs HM	4 - Mono	4a - CD14+ Mono	PIAS4	6.13398e-08	0.0838388	0.073	0.036	0.00132972	up
CM vs HM	4 - Mono	4a - CD14+ Mono	HEXA	6.21163e-08	-0.249372	0.265	0.312	0.00134656	down
CM vs HM	4 - Mono	4a - CD14+ Mono	SREBF2	6.21904e-08	0.114573	0.137	0.083	0.00134816	up
CM vs HM	4 - Mono	4a - CD14+ Mono	RPL22L1	6.3029e-08	-0.225462	0.422	0.457	0.00136634	down
CM vs HM	4 - Mono	4a - CD14+ Mono	KDM5B	6.35771e-08	0.0942831	0.106	0.06	0.00137822	up
CM vs HM	4 - Mono	4a - CD14+ Mono	SMU1	6.36236e-08	0.100875	0.239	0.165	0.00137923	up
CM vs HM	4 - Mono	4a - CD14+ Mono	GNG2	6.40759e-08	0.12296	0.301	0.216	0.00138904	up
CM vs HM	4 - Mono	4a - CD14+ Mono	FAM217B	6.61089e-08	0.100405	0.126	0.075	0.00143311	up
CM vs HM	4 - Mono	4a - CD14+ Mono	STIM1	6.6761e-08	0.0985029	0.15	0.093	0.00144724	up
CM vs HM	4 - Mono	4a - CD14+ Mono	PPM1D	6.76882e-08	0.0795605	0.078	0.039	0.00146735	up
CM vs HM	4 - Mono	4a - CD14+ Mono	CD200R1	6.79123e-08	0.0432501	0.02	0.002	0.0014722	up
CM vs HM	4 - Mono	4a - CD14+ Mono	UBE2E2	6.81111e-08	0.0914175	0.125	0.074	0.00147651	up
CM vs HM	4 - Mono	4a - CD14+ Mono	OTULINL	6.9044e-08	0.105501	0.221	0.15	0.00149674	up
CM vs HM	4 - Mono	4a - CD14+ Mono	MAPK13	6.96582e-08	0.0463472	0.02	0.002	0.00151005	up
CM vs HM	4 - Mono	4a - CD14+ Mono	PCMTD2	7.0223e-08	0.0921331	0.096	0.052	0.00152229	up
CM vs HM	4 - Mono	4a - CD14+ Mono	APC	7.05168e-08	0.111932	0.17	0.11	0.00152866	up
CM vs HM	4 - Mono	4a - CD14+ Mono	UBE2K	7.08375e-08	0.0821933	0.27	0.188	0.00153561	up
CM vs HM	4 - Mono	4a - CD14+ Mono	NUP98	7.27702e-08	0.125793	0.166	0.107	0.00157751	up
CM vs HM	4 - Mono	4a - CD14+ Mono	E2F3	7.30879e-08	0.109926	0.144	0.089	0.0015844	up
CM vs HM	4 - Mono	4a - CD14+ Mono	CAT	7.42926e-08	0.126001	0.485	0.372	0.00161051	up
CM vs HM	4 - Mono	4a - CD14+ Mono	NCOR2	7.48842e-08	0.112547	0.235	0.16	0.00162334	up
CM vs HM	4 - Mono	4a - CD14+ Mono	FCN1	7.62913e-08	-0.12539	0.982	0.989	0.00165384	down
CM vs HM	4 - Mono	4a - CD14+ Mono	CIAO1	7.65324e-08	0.115627	0.28	0.199	0.00165907	up
CM vs HM	4 - Mono	4a - CD14+ Mono	PTS	7.73495e-08	0.0815567	0.086	0.045	0.00167678	up
CM vs HM	4 - Mono	4a - CD14+ Mono	UBALD1	7.90322e-08	0.0848971	0.089	0.047	0.00171326	up
CM vs HM	4 - Mono	4a - CD14+ Mono	CWC15	8.03093e-08	0.132874	0.346	0.252	0.00174094	up
CM vs HM	4 - Mono	4a - CD14+ Mono	PLCB2	8.0539e-08	0.132866	0.457	0.349	0.00174593	up
CM vs HM	4 - Mono	4a - CD14+ Mono	CLEC4E	8.08493e-08	-0.290331	0.278	0.323	0.00175265	down
CM vs HM	4 - Mono	4a - CD14+ Mono	MAP3K2	8.20793e-08	0.103421	0.281	0.199	0.00177932	up
CM vs HM	4 - Mono	4a - CD14+ Mono	NOC4L	8.38427e-08	0.080844	0.085	0.044	0.00181754	up
CM vs HM	4 - Mono	4a - CD14+ Mono	MED16	8.49655e-08	0.0690406	0.127	0.076	0.00184188	up
CM vs HM	4 - Mono	4a - CD14+ Mono	LSM14A	8.61529e-08	0.111884	0.294	0.209	0.00186762	up
CM vs HM	4 - Mono	4a - CD14+ Mono	TRIP12	8.77162e-08	0.103404	0.321	0.232	0.00190151	up
CM vs HM	4 - Mono	4a - CD14+ Mono	SPCS3	8.84005e-08	0.128964	0.388	0.293	0.00191635	up
CM vs HM	4 - Mono	4a - CD14+ Mono	FEM1B	8.9749e-08	0.0827087	0.128	0.077	0.00194558	up
CM vs HM	4 - Mono	4a - CD14+ Mono	GPANK1	9.07341e-08	0.102715	0.146	0.091	0.00196693	up
CM vs HM	4 - Mono	4a - CD14+ Mono	LY96	9.24421e-08	-0.245213	0.384	0.415	0.00200396	down
CM vs HM	4 - Mono	4a - CD14+ Mono	AC104695.4	9.25532e-08	-0.095321	0.016	0.04	0.00200637	down
CM vs HM	4 - Mono	4a - CD14+ Mono	G3BP2	9.40858e-08	0.112512	0.288	0.206	0.00203959	up
CM vs HM	4 - Mono	4a - CD14+ Mono	ITGB3	9.48692e-08	0.0523615	0.021	0.003	0.00205658	up
CM vs HM	4 - Mono	4a - CD14+ Mono	BASP1	9.56235e-08	0.127489	0.138	0.085	0.00207293	up
CM vs HM	4 - Mono	4a - CD14+ Mono	MYL6	9.72836e-08	0.106061	0.986	0.993	0.00210891	up
CM vs HM	4 - Mono	4a - CD14+ Mono	RNF11	1.00868e-07	0.0732853	0.112	0.065	0.00218663	up
CM vs HM	4 - Mono	4a - CD14+ Mono	UTS2	1.00879e-07	-0.116037	0.023	0.05	0.00218686	down
CM vs HM	4 - Mono	4a - CD14+ Mono	IER5	1.01542e-07	-0.202984	0.125	0.173	0.00220123	down
CM vs HM	4 - Mono	4a - CD14+ Mono	C1RL	1.0171e-07	0.0987857	0.114	0.066	0.00220488	up
CM vs HM	4 - Mono	4a - CD14+ Mono	LDLRAP1	1.03851e-07	0.0560945	0.061	0.028	0.00225128	up
CM vs HM	4 - Mono	4a - CD14+ Mono	CCDC18	1.06165e-07	0.104041	0.117	0.069	0.00230145	up
CM vs HM	4 - Mono	4a - CD14+ Mono	INKA2	1.09395e-07	0.0826677	0.065	0.03	0.00237147	up
CM vs HM	4 - Mono	4a - CD14+ Mono	SUGT1	1.10391e-07	0.122105	0.293	0.211	0.00239307	up
CM vs HM	4 - Mono	4a - CD14+ Mono	SKIL	1.11057e-07	0.115468	0.101	0.057	0.00240748	up
CM vs HM	4 - Mono	4a - CD14+ Mono	FCGR3A	1.1225e-07	-0.469301	0.071	0.112	0.00243336	down
CM vs HM	4 - Mono	4a - CD14+ Mono	APPL1	1.13311e-07	0.0666587	0.208	0.138	0.00245635	up
CM vs HM	4 - Mono	4a - CD14+ Mono	DGKD	1.15914e-07	0.085182	0.195	0.129	0.00251278	up
CM vs HM	4 - Mono	4a - CD14+ Mono	NUDT16L1	1.16468e-07	0.0983785	0.159	0.101	0.00252478	up
CM vs HM	4 - Mono	4a - CD14+ Mono	KIAA0930	1.19154e-07	0.1437	0.402	0.306	0.00258302	up
CM vs HM	4 - Mono	4a - CD14+ Mono	DHX9	1.20215e-07	0.0673995	0.26	0.181	0.00260602	up
CM vs HM	4 - Mono	4a - CD14+ Mono	Z93241.1	1.20555e-07	0.203567	0.265	0.192	0.00261338	up
CM vs HM	4 - Mono	4a - CD14+ Mono	DHX29	1.20643e-07	0.114457	0.198	0.134	0.00261529	up
CM vs HM	4 - Mono	4a - CD14+ Mono	FAM98A	1.20913e-07	0.0788983	0.063	0.029	0.00262116	up
CM vs HM	4 - Mono	4a - CD14+ Mono	ERAP2	1.21541e-07	0.0849513	0.179	0.116	0.00263477	up
CM vs HM	4 - Mono	4a - CD14+ Mono	NCF4	1.23092e-07	0.161954	0.574	0.477	0.00266838	up
CM vs HM	4 - Mono	4a - CD14+ Mono	SSR2	1.24565e-07	-0.167094	0.64	0.653	0.00270032	down
CM vs HM	4 - Mono	4a - CD14+ Mono	MX2	1.24771e-07	0.136093	0.353	0.263	0.00270479	up
CM vs HM	4 - Mono	4a - CD14+ Mono	SRPRA	1.27332e-07	0.129059	0.276	0.198	0.0027603	up
CM vs HM	4 - Mono	4a - CD14+ Mono	TMOD2	1.27714e-07	0.114338	0.129	0.079	0.00276859	up
CM vs HM	4 - Mono	4a - CD14+ Mono	TAF7	1.28308e-07	0.12512	0.279	0.202	0.00278147	up
CM vs HM	4 - Mono	4a - CD14+ Mono	TP53RK	1.28431e-07	0.0689205	0.053	0.022	0.00278412	up
CM vs HM	4 - Mono	4a - CD14+ Mono	C16orf54	1.29987e-07	0.106052	0.193	0.128	0.00281785	up
CM vs HM	4 - Mono	4a - CD14+ Mono	SAFB2	1.30142e-07	0.0919654	0.216	0.147	0.00282122	up
CM vs HM	4 - Mono	4a - CD14+ Mono	DCAF6	1.34657e-07	0.0864557	0.099	0.055	0.00291909	up
CM vs HM	4 - Mono	4a - CD14+ Mono	SEPHS2	1.35866e-07	0.0640259	0.142	0.087	0.00294531	up
CM vs HM	4 - Mono	4a - CD14+ Mono	SLTM	1.36276e-07	0.148895	0.395	0.303	0.0029542	up
CM vs HM	4 - Mono	4a - CD14+ Mono	AP5B1	1.36768e-07	0.113972	0.265	0.188	0.00296487	up
CM vs HM	4 - Mono	4a - CD14+ Mono	SLC30A5	1.37467e-07	0.0700072	0.085	0.044	0.00298001	up
CM vs HM	4 - Mono	4a - CD14+ Mono	GRK6	1.37612e-07	0.104281	0.229	0.157	0.00298316	up
CM vs HM	4 - Mono	4a - CD14+ Mono	MRPL51	1.37656e-07	0.126855	0.458	0.352	0.0029841	up
CM vs HM	4 - Mono	4a - CD14+ Mono	HNRNPH2	1.37811e-07	0.136397	0.354	0.264	0.00298746	up
CM vs HM	4 - Mono	4a - CD14+ Mono	MSH3	1.37862e-07	0.0993402	0.093	0.051	0.00298858	up
CM vs HM	4 - Mono	4a - CD14+ Mono	CMC1	1.38242e-07	0.0858444	0.186	0.123	0.00299681	up
CM vs HM	4 - Mono	4a - CD14+ Mono	FOXP1	1.38263e-07	0.156019	0.325	0.24	0.00299727	up
CM vs HM	4 - Mono	4a - CD14+ Mono	DHX16	1.38855e-07	0.0979635	0.164	0.106	0.00301009	up
CM vs HM	4 - Mono	4a - CD14+ Mono	ACTG1	1.40395e-07	-0.121896	0.982	0.989	0.00304349	down
CM vs HM	4 - Mono	4a - CD14+ Mono	EML4	1.40678e-07	0.0751059	0.23	0.157	0.00304961	up
CM vs HM	4 - Mono	4a - CD14+ Mono	VPS29	1.41276e-07	0.113073	0.522	0.411	0.00306259	up
CM vs HM	4 - Mono	4a - CD14+ Mono	RIPK2	1.42794e-07	0.0738583	0.183	0.12	0.00309548	up
CM vs HM	4 - Mono	4a - CD14+ Mono	PDZK1IP1	1.47058e-07	0.0425921	0.018	0.002	0.00318792	up
CM vs HM	4 - Mono	4a - CD14+ Mono	FKBP1A	1.48295e-07	0.122273	0.818	0.779	0.00321474	up
CM vs HM	4 - Mono	4a - CD14+ Mono	PRDX2	1.4839e-07	0.120391	0.209	0.144	0.00321679	up
CM vs HM	4 - Mono	4a - CD14+ Mono	ANAPC2	1.49423e-07	0.0788638	0.117	0.068	0.00323919	up
CM vs HM	4 - Mono	4a - CD14+ Mono	AC147067.1	1.50499e-07	0.0621474	0.066	0.032	0.00326252	up
CM vs HM	4 - Mono	4a - CD14+ Mono	NDUFB7	1.50968e-07	0.140314	0.632	0.522	0.00327268	up
CM vs HM	4 - Mono	4a - CD14+ Mono	CALHM6	1.51682e-07	0.0834044	0.093	0.051	0.00328816	up
CM vs HM	4 - Mono	4a - CD14+ Mono	EIF4B	1.5247e-07	0.136818	0.625	0.523	0.00330524	up
CM vs HM	4 - Mono	4a - CD14+ Mono	CAPN2	1.55261e-07	0.116917	0.435	0.331	0.00336575	up
CM vs HM	4 - Mono	4a - CD14+ Mono	HERC5	1.55322e-07	0.155417	0.072	0.037	0.00336706	up
CM vs HM	4 - Mono	4a - CD14+ Mono	BCL9L	1.56699e-07	0.0723676	0.069	0.034	0.00339693	up
CM vs HM	4 - Mono	4a - CD14+ Mono	SCCPDH	1.59344e-07	0.082157	0.093	0.051	0.00345426	up
CM vs HM	4 - Mono	4a - CD14+ Mono	PGK1	1.59372e-07	0.147916	0.756	0.675	0.00345486	up
CM vs HM	4 - Mono	4a - CD14+ Mono	PIP4P2	1.60318e-07	0.116415	0.196	0.133	0.00347537	up
CM vs HM	4 - Mono	4a - CD14+ Mono	KDM5A	1.61362e-07	0.121685	0.33	0.245	0.00349801	up
CM vs HM	4 - Mono	4a - CD14+ Mono	RARA	1.61913e-07	0.133687	0.323	0.239	0.00350994	up
CM vs HM	4 - Mono	4a - CD14+ Mono	MPP7	1.63918e-07	0.0865547	0.133	0.081	0.00355342	up
CM vs HM	4 - Mono	4a - CD14+ Mono	KIAA1841	1.65374e-07	0.0769692	0.036	0.012	0.00358498	up
CM vs HM	4 - Mono	4a - CD14+ Mono	ARRDC4	1.65939e-07	0.0813608	0.133	0.081	0.00359722	up
CM vs HM	4 - Mono	4a - CD14+ Mono	ACOX1	1.66287e-07	0.0922456	0.184	0.121	0.00360476	up
CM vs HM	4 - Mono	4a - CD14+ Mono	ATP6V1A	1.67146e-07	0.0857105	0.317	0.229	0.0036234	up
CM vs HM	4 - Mono	4a - CD14+ Mono	IL15RA	1.67723e-07	0.0767608	0.054	0.023	0.00363589	up
CM vs HM	4 - Mono	4a - CD14+ Mono	CRIP3	1.75282e-07	-0.0710244	0.01	0.031	0.00379976	down
CM vs HM	4 - Mono	4a - CD14+ Mono	PSMG4	1.75798e-07	0.0902838	0.14	0.087	0.00381096	up
CM vs HM	4 - Mono	4a - CD14+ Mono	MON1B	1.76685e-07	0.106396	0.212	0.145	0.00383019	up
CM vs HM	4 - Mono	4a - CD14+ Mono	CUL5	1.76844e-07	0.101095	0.177	0.117	0.00383362	up
CM vs HM	4 - Mono	4a - CD14+ Mono	CDC26	1.77077e-07	0.069553	0.238	0.163	0.00383868	up
CM vs HM	4 - Mono	4a - CD14+ Mono	RBM27	1.78563e-07	0.121668	0.211	0.143	0.0038709	up
CM vs HM	4 - Mono	4a - CD14+ Mono	CLIP1	1.80044e-07	0.0858586	0.27	0.191	0.00390298	up
CM vs HM	4 - Mono	4a - CD14+ Mono	IFI27L2	1.81308e-07	0.139705	0.482	0.377	0.0039304	up
CM vs HM	4 - Mono	4a - CD14+ Mono	SUMF1	1.84333e-07	0.114144	0.134	0.083	0.00399598	up
CM vs HM	4 - Mono	4a - CD14+ Mono	ETS2	1.9021e-07	0.10729	0.155	0.1	0.00412336	up
CM vs HM	4 - Mono	4a - CD14+ Mono	TNNC2	1.90568e-07	0.0386629	0.016	0.001	0.00413113	up
CM vs HM	4 - Mono	4a - CD14+ Mono	DDX18	1.91051e-07	0.0992523	0.305	0.221	0.0041416	up
CM vs HM	4 - Mono	4a - CD14+ Mono	IQSEC1	1.91395e-07	0.175369	0.332	0.248	0.00414906	up
CM vs HM	4 - Mono	4a - CD14+ Mono	AP003307.1	1.93249e-07	0.0776677	0.069	0.034	0.00418926	up
CM vs HM	4 - Mono	4a - CD14+ Mono	SF3B2	1.94073e-07	0.136908	0.649	0.54	0.00420712	up
CM vs HM	4 - Mono	4a - CD14+ Mono	ARSD	1.97085e-07	0.096374	0.176	0.116	0.00427241	up
CM vs HM	4 - Mono	4a - CD14+ Mono	IL1RAP	2.01851e-07	0.0966434	0.064	0.031	0.00437573	up
CM vs HM	4 - Mono	4a - CD14+ Mono	PLCB1	2.05977e-07	0.0787134	0.094	0.052	0.00446518	up
CM vs HM	4 - Mono	4a - CD14+ Mono	PSPC1	2.06534e-07	0.0913477	0.129	0.079	0.00447725	up
CM vs HM	4 - Mono	4a - CD14+ Mono	HSPA6	2.07772e-07	-0.217631	0.156	0.206	0.00450408	down
CM vs HM	4 - Mono	4a - CD14+ Mono	SLC8A1	2.08573e-07	0.100942	0.237	0.166	0.00452144	up
CM vs HM	4 - Mono	4a - CD14+ Mono	CALHM2	2.09708e-07	-0.223166	0.177	0.224	0.00454605	down
CM vs HM	4 - Mono	4a - CD14+ Mono	AC015871.1	2.09738e-07	0.0910058	0.149	0.094	0.0045467	up
CM vs HM	4 - Mono	4a - CD14+ Mono	ATP23	2.12031e-07	0.0654557	0.069	0.034	0.00459641	up
CM vs HM	4 - Mono	4a - CD14+ Mono	ORAI3	2.15259e-07	0.0846741	0.12	0.072	0.00466638	up
CM vs HM	4 - Mono	4a - CD14+ Mono	PKM	2.17726e-07	0.117589	0.907	0.88	0.00471987	up
CM vs HM	4 - Mono	4a - CD14+ Mono	CDK11B	2.18242e-07	0.093099	0.199	0.135	0.00473106	up
CM vs HM	4 - Mono	4a - CD14+ Mono	ANKRD11	2.184e-07	0.140165	0.369	0.28	0.00473447	up
CM vs HM	4 - Mono	4a - CD14+ Mono	IRF2	2.19715e-07	0.112796	0.345	0.257	0.00476298	up
CM vs HM	4 - Mono	4a - CD14+ Mono	TMEM50A	2.21361e-07	0.146217	0.548	0.446	0.00479866	up
CM vs HM	4 - Mono	4a - CD14+ Mono	SAMD9	2.26882e-07	0.093086	0.155	0.1	0.00491836	up
CM vs HM	4 - Mono	4a - CD14+ Mono	SLC25A3	2.31719e-07	0.114552	0.775	0.706	0.00502321	up
CM vs HM	4 - Mono	4a - CD14+ Mono	DEF8	2.34284e-07	0.124121	0.279	0.2	0.0050788	up
CM vs HM	4 - Mono	4a - CD14+ Mono	MOSPD3	2.35899e-07	0.0830939	0.077	0.04	0.00511382	up
CM vs HM	4 - Mono	4a - CD14+ Mono	RNF168	2.37637e-07	0.0870006	0.135	0.084	0.00515149	up
CM vs HM	4 - Mono	4a - CD14+ Mono	PDCD4-AS1	2.43938e-07	0.0495909	0.043	0.016	0.00528808	up
CM vs HM	4 - Mono	4a - CD14+ Mono	BNIP3	2.46945e-07	0.0521883	0.037	0.012	0.00535327	up
CM vs HM	4 - Mono	4a - CD14+ Mono	RC3H1	2.48274e-07	0.0755638	0.177	0.116	0.00538209	up
CM vs HM	4 - Mono	4a - CD14+ Mono	IKBKE	2.56892e-07	0.0891144	0.183	0.122	0.00556891	up
CM vs HM	4 - Mono	4a - CD14+ Mono	SRGAP2C	2.56919e-07	0.0838342	0.132	0.081	0.00556949	up
CM vs HM	4 - Mono	4a - CD14+ Mono	RFX2	2.62133e-07	0.111629	0.069	0.035	0.00568251	up
CM vs HM	4 - Mono	4a - CD14+ Mono	AC010642.2	2.66722e-07	0.0918763	0.156	0.1	0.00578201	up
CM vs HM	4 - Mono	4a - CD14+ Mono	PPP2R5E	2.67358e-07	0.0731899	0.185	0.122	0.00579579	up
CM vs HM	4 - Mono	4a - CD14+ Mono	IWS1	2.68191e-07	0.0991887	0.182	0.121	0.00581385	up
CM vs HM	4 - Mono	4a - CD14+ Mono	FGFR1OP2	2.68493e-07	0.122253	0.33	0.243	0.00582039	up
CM vs HM	4 - Mono	4a - CD14+ Mono	ZNF444	2.70242e-07	0.070873	0.043	0.016	0.00585831	up
CM vs HM	4 - Mono	4a - CD14+ Mono	LDHB	2.72785e-07	-0.224903	0.429	0.457	0.00591344	down
CM vs HM	4 - Mono	4a - CD14+ Mono	PAX8	2.79591e-07	0.0354535	0.015	0.001	0.00606097	up
CM vs HM	4 - Mono	4a - CD14+ Mono	GIGYF2	2.82059e-07	0.125499	0.181	0.122	0.00611448	up
CM vs HM	4 - Mono	4a - CD14+ Mono	PIN1	2.83791e-07	0.0808182	0.321	0.231	0.00615202	up
CM vs HM	4 - Mono	4a - CD14+ Mono	ADM	2.86135e-07	0.120426	0.093	0.053	0.00620284	up
CM vs HM	4 - Mono	4a - CD14+ Mono	RNF115	2.99088e-07	0.06386	0.121	0.072	0.00648362	up
CM vs HM	4 - Mono	4a - CD14+ Mono	ZC3H13	2.99533e-07	0.094558	0.25	0.175	0.00649329	up
CM vs HM	4 - Mono	4a - CD14+ Mono	ACSL1	3.03438e-07	0.146647	0.292	0.213	0.00657793	up
CM vs HM	4 - Mono	4a - CD14+ Mono	IGLV8-61	3.04886e-07	-0.0439883	0	0.009	0.00660931	down
CM vs HM	4 - Mono	4a - CD14+ Mono	MAEL	3.04886e-07	-0.034286	0	0.009	0.00660931	down
CM vs HM	4 - Mono	4a - CD14+ Mono	ZNF326	3.07038e-07	0.0863292	0.124	0.075	0.00665596	up
CM vs HM	4 - Mono	4a - CD14+ Mono	ATP2B4	3.12648e-07	0.114214	0.176	0.117	0.00677758	up
CM vs HM	4 - Mono	4a - CD14+ Mono	TNFAIP6	3.16655e-07	0.0890997	0.063	0.03	0.00686444	up
CM vs HM	4 - Mono	4a - CD14+ Mono	FUT7	3.20649e-07	0.0889434	0.098	0.056	0.00695103	up
CM vs HM	4 - Mono	4a - CD14+ Mono	RANBP2	3.22821e-07	0.126827	0.28	0.202	0.00699812	up
CM vs HM	4 - Mono	4a - CD14+ Mono	TBC1D22A	3.27491e-07	0.112346	0.216	0.15	0.00709936	up
CM vs HM	4 - Mono	4a - CD14+ Mono	FBXO7	3.31887e-07	0.0865211	0.286	0.204	0.00719465	up
CM vs HM	4 - Mono	4a - CD14+ Mono	ARL6IP5	3.34693e-07	0.159818	0.612	0.51	0.00725547	up
CM vs HM	4 - Mono	4a - CD14+ Mono	ZC3H18	3.37709e-07	0.10175	0.193	0.13	0.00732086	up
CM vs HM	4 - Mono	4a - CD14+ Mono	STARD4	3.38342e-07	0.0485991	0.053	0.023	0.00733457	up
CM vs HM	4 - Mono	4a - CD14+ Mono	GID8	3.39698e-07	0.0498064	0.206	0.138	0.00736396	up
CM vs HM	4 - Mono	4a - CD14+ Mono	PSMD12	3.40247e-07	0.0971608	0.205	0.14	0.00737587	up
CM vs HM	4 - Mono	4a - CD14+ Mono	ABCC3	3.44703e-07	0.0745136	0.075	0.039	0.00747247	up
CM vs HM	4 - Mono	4a - CD14+ Mono	SEPTIN5	3.45494e-07	0.0391258	0.014	0	0.00748961	up
CM vs HM	4 - Mono	4a - CD14+ Mono	RHOT1	3.50564e-07	0.0991102	0.173	0.115	0.00759952	up
CM vs HM	4 - Mono	4a - CD14+ Mono	DLEU2	3.58972e-07	0.100229	0.131	0.082	0.0077818	up
CM vs HM	4 - Mono	4a - CD14+ Mono	BX284668.5	3.61719e-07	0.11137	0.247	0.174	0.00784134	up
CM vs HM	4 - Mono	4a - CD14+ Mono	ICK	3.66078e-07	0.0578586	0.062	0.029	0.00793585	up
CM vs HM	4 - Mono	4a - CD14+ Mono	LILRA6	3.67849e-07	0.10255	0.296	0.214	0.00797423	up
CM vs HM	4 - Mono	4a - CD14+ Mono	CTSB	3.68131e-07	-0.173783	0.782	0.774	0.00798034	down
CM vs HM	4 - Mono	4a - CD14+ Mono	DDX46	3.68155e-07	0.15076	0.481	0.377	0.00798087	up
CM vs HM	4 - Mono	4a - CD14+ Mono	RAP1B	3.70683e-07	0.143474	0.618	0.507	0.00803567	up
CM vs HM	4 - Mono	4a - CD14+ Mono	ANKRD10	3.71463e-07	0.0551025	0.191	0.126	0.00805258	up
CM vs HM	4 - Mono	4a - CD14+ Mono	TLE4	3.71993e-07	0.098213	0.251	0.177	0.00806407	up
CM vs HM	4 - Mono	4a - CD14+ Mono	MANF	3.73598e-07	0.0673973	0.096	0.054	0.00809887	up
CM vs HM	4 - Mono	4a - CD14+ Mono	C6orf47	3.78387e-07	0.0739897	0.093	0.052	0.00820266	up
CM vs HM	4 - Mono	4a - CD14+ Mono	HERPUD2	3.78819e-07	0.0790905	0.118	0.072	0.00821203	up
CM vs HM	4 - Mono	4a - CD14+ Mono	ELOC	3.82695e-07	0.128273	0.415	0.319	0.00829607	up
CM vs HM	4 - Mono	4a - CD14+ Mono	AP1S2	3.84613e-07	0.136567	0.594	0.505	0.00833765	up
CM vs HM	4 - Mono	4a - CD14+ Mono	PPCS	3.9601e-07	0.121544	0.417	0.319	0.00858471	up
CM vs HM	4 - Mono	4a - CD14+ Mono	RABEP1	3.9793e-07	0.063795	0.116	0.069	0.00862633	up
CM vs HM	4 - Mono	4a - CD14+ Mono	CTNNB1	4.01566e-07	0.0959341	0.329	0.244	0.00870514	up
CM vs HM	4 - Mono	4a - CD14+ Mono	CEMIP2	4.0241e-07	0.0910946	0.122	0.075	0.00872345	up
CM vs HM	4 - Mono	4a - CD14+ Mono	PHLDA1	4.03514e-07	0.107631	0.022	0.004	0.00874738	up
CM vs HM	4 - Mono	4a - CD14+ Mono	OVCH1-AS1	4.11826e-07	0.0371296	0.013	0	0.00892757	up
CM vs HM	4 - Mono	4a - CD14+ Mono	CBFA2T3	4.12194e-07	0.112049	0.138	0.088	0.00893554	up
CM vs HM	4 - Mono	4a - CD14+ Mono	ELF2	4.19589e-07	0.107925	0.222	0.154	0.00909584	up
CM vs HM	4 - Mono	4a - CD14+ Mono	SNX18	4.28697e-07	0.0823241	0.164	0.108	0.0092933	up
CM vs HM	4 - Mono	4a - CD14+ Mono	CDK9	4.29639e-07	0.0812424	0.121	0.074	0.00931372	up
CM vs HM	4 - Mono	4a - CD14+ Mono	TGFBI	4.30755e-07	-0.21156	0.573	0.582	0.0093379	down
CM vs HM	4 - Mono	4a - CD14+ Mono	UBALD2	4.34314e-07	0.0823344	0.142	0.089	0.00941506	up
CM vs HM	4 - Mono	4a - CD14+ Mono	RGS14	4.38141e-07	0.098296	0.333	0.244	0.00949802	up
CM vs HM	4 - Mono	4a - CD14+ Mono	CES1	4.38634e-07	0.112153	0.233	0.166	0.00950871	up
CM vs HM	4 - Mono	4a - CD14+ Mono	ABHD14A	4.43903e-07	0.0545736	0.041	0.015	0.00962292	up
CM vs HM	4 - Mono	4a - CD14+ Mono	GNB4	4.46514e-07	0.100113	0.21	0.144	0.00967954	up
CM vs HM	4 - Mono	4a - CD14+ Mono	AL034397.3	4.48418e-07	0.111479	0.29	0.21	0.00972081	up
CM vs HM	4 - Mono	4a - CD14+ Mono	VPS26A	4.50535e-07	0.0762225	0.194	0.13	0.0097667	up
CM vs HM	4 - Mono	4a - CD14+ Mono	UBR5	4.52722e-07	0.082186	0.151	0.096	0.00981411	up
CM vs HM	4 - Mono	4a - CD14+ Mono	HCG11	4.5471e-07	0.0739475	0.069	0.035	0.0098572	up
CM vs HM	4 - Mono	4a - CD14+ Mono	ARNTL	4.68883e-07	0.0812948	0.091	0.051	0.0101644	up
CM vs HM	4 - Mono	4a - CD14+ Mono	HERPUD1	4.7025e-07	-0.259262	0.394	0.424	0.0101941	down
CM vs HM	4 - Mono	4a - CD14+ Mono	CMTM5	4.71516e-07	0.0542599	0.039	0.014	0.0102215	up
CM vs HM	4 - Mono	4a - CD14+ Mono	ZDHHC16	4.74674e-07	0.0712627	0.061	0.029	0.01029	up
CM vs HM	4 - Mono	4a - CD14+ Mono	IFITM2	4.82307e-07	0.121054	0.941	0.917	0.0104554	up
CM vs HM	4 - Mono	4a - CD14+ Mono	GNL1	4.83121e-07	0.104056	0.106	0.062	0.0104731	up
CM vs HM	4 - Mono	4a - CD14+ Mono	RBM39	4.84727e-07	0.163558	0.687	0.584	0.0105079	up
CM vs HM	4 - Mono	4a - CD14+ Mono	BCL7B	4.87253e-07	0.11537	0.116	0.07	0.0105627	up
CM vs HM	4 - Mono	4a - CD14+ Mono	TAOK1	4.89408e-07	0.087403	0.26	0.186	0.0106094	up
CM vs HM	4 - Mono	4a - CD14+ Mono	PCGF3	4.90488e-07	0.0854222	0.122	0.074	0.0106328	up
CM vs HM	4 - Mono	4a - CD14+ Mono	NAA38	5.13512e-07	0.174949	0.603	0.503	0.0111319	up
CM vs HM	4 - Mono	4a - CD14+ Mono	NOL3	5.16106e-07	0.0783506	0.052	0.023	0.0111881	up
CM vs HM	4 - Mono	4a - CD14+ Mono	GP9	5.16359e-07	0.102735	0.051	0.023	0.0111936	up
CM vs HM	4 - Mono	4a - CD14+ Mono	ARFGAP3	5.16901e-07	0.104451	0.183	0.124	0.0112054	up
CM vs HM	4 - Mono	4a - CD14+ Mono	CSF3R	5.18588e-07	-0.126194	0.827	0.833	0.011242	down
CM vs HM	4 - Mono	4a - CD14+ Mono	HIPK3	5.25641e-07	0.0901213	0.36	0.27	0.0113949	up
CM vs HM	4 - Mono	4a - CD14+ Mono	RASA4	5.29866e-07	0.103822	0.12	0.074	0.0114864	up
CM vs HM	4 - Mono	4a - CD14+ Mono	SPEN	5.31949e-07	0.086683	0.255	0.181	0.0115316	up
CM vs HM	4 - Mono	4a - CD14+ Mono	NKG7	5.38556e-07	0.125403	0.245	0.176	0.0116748	up
CM vs HM	4 - Mono	4a - CD14+ Mono	ECPAS	5.41173e-07	0.078055	0.141	0.089	0.0117315	up
CM vs HM	4 - Mono	4a - CD14+ Mono	MAP1LC3A	5.44129e-07	0.0594547	0.025	0.006	0.0117956	up
CM vs HM	4 - Mono	4a - CD14+ Mono	ZBTB8OS	5.47256e-07	0.112011	0.261	0.189	0.0118634	up
CM vs HM	4 - Mono	4a - CD14+ Mono	NSA2	5.47788e-07	-0.21211	0.531	0.55	0.0118749	down
CM vs HM	4 - Mono	4a - CD14+ Mono	PIK3CB	5.5525e-07	0.0663733	0.126	0.078	0.0120367	up
CM vs HM	4 - Mono	4a - CD14+ Mono	SECISBP2	5.59566e-07	0.0971871	0.191	0.129	0.0121303	up
CM vs HM	4 - Mono	4a - CD14+ Mono	TBC1D7	5.64819e-07	0.063675	0.083	0.045	0.0122441	up
CM vs HM	4 - Mono	4a - CD14+ Mono	PCSK5	5.71524e-07	0.0697465	0.079	0.042	0.0123895	up
CM vs HM	4 - Mono	4a - CD14+ Mono	KDELR2	5.75553e-07	0.086899	0.168	0.112	0.0124768	up
CM vs HM	4 - Mono	4a - CD14+ Mono	ST14	5.8432e-07	0.0999658	0.116	0.071	0.0126669	up
CM vs HM	4 - Mono	4a - CD14+ Mono	ACAP3	5.92716e-07	0.0918861	0.097	0.056	0.0128489	up
CM vs HM	4 - Mono	4a - CD14+ Mono	PLA2G12A	5.99941e-07	0.0604362	0.048	0.021	0.0130055	up
CM vs HM	4 - Mono	4a - CD14+ Mono	MED19	6.00401e-07	0.0666451	0.08	0.043	0.0130155	up
CM vs HM	4 - Mono	4a - CD14+ Mono	TMED8	6.02308e-07	0.079041	0.092	0.052	0.0130568	up
CM vs HM	4 - Mono	4a - CD14+ Mono	BLOC1S2	6.11635e-07	0.104942	0.333	0.247	0.013259	up
CM vs HM	4 - Mono	4a - CD14+ Mono	TXNRD2	6.12662e-07	0.0944863	0.142	0.09	0.0132813	up
CM vs HM	4 - Mono	4a - CD14+ Mono	PSMB3	6.1536e-07	0.16101	0.767	0.676	0.0133398	up
CM vs HM	4 - Mono	4a - CD14+ Mono	LINC01503	6.18503e-07	0.0614225	0.135	0.085	0.0134079	up
CM vs HM	4 - Mono	4a - CD14+ Mono	BTBD19	6.22563e-07	0.078708	0.03	0.009	0.0134959	up
CM vs HM	4 - Mono	4a - CD14+ Mono	ARAP1	6.23382e-07	0.13253	0.566	0.469	0.0135137	up
CM vs HM	4 - Mono	4a - CD14+ Mono	KMT2C	6.29355e-07	0.112452	0.417	0.323	0.0136432	up
CM vs HM	4 - Mono	4a - CD14+ Mono	BOD1L1	6.34204e-07	0.117261	0.342	0.256	0.0137483	up
CM vs HM	4 - Mono	4a - CD14+ Mono	CLTC	6.50252e-07	0.115089	0.464	0.359	0.0140962	up
CM vs HM	4 - Mono	4a - CD14+ Mono	LRRC58	6.61412e-07	0.0901089	0.15	0.097	0.0143381	up
CM vs HM	4 - Mono	4a - CD14+ Mono	PLBD1-AS1	6.63487e-07	0.0576902	0.049	0.021	0.0143831	up
CM vs HM	4 - Mono	4a - CD14+ Mono	SCYL2	6.70467e-07	0.071114	0.117	0.071	0.0145344	up
CM vs HM	4 - Mono	4a - CD14+ Mono	FBXO34	6.77984e-07	0.0673355	0.069	0.035	0.0146973	up
CM vs HM	4 - Mono	4a - CD14+ Mono	MATR3.1	6.7861e-07	0.101493	0.178	0.121	0.0147109	up
CM vs HM	4 - Mono	4a - CD14+ Mono	TUBGCP3	6.90201e-07	0.0655145	0.123	0.076	0.0149622	up
CM vs HM	4 - Mono	4a - CD14+ Mono	NPL	7.01771e-07	0.0689882	0.252	0.178	0.015213	up
CM vs HM	4 - Mono	4a - CD14+ Mono	TAF10	7.10426e-07	0.0774197	0.099	0.058	0.0154006	up
CM vs HM	4 - Mono	4a - CD14+ Mono	ZC3H11A	7.1843e-07	0.0556285	0.061	0.029	0.0155741	up
CM vs HM	4 - Mono	4a - CD14+ Mono	RAP2B	7.20261e-07	0.106411	0.199	0.137	0.0156138	up
CM vs HM	4 - Mono	4a - CD14+ Mono	PRDM2	7.29066e-07	0.100634	0.191	0.13	0.0158047	up
CM vs HM	4 - Mono	4a - CD14+ Mono	HMGN3	7.38087e-07	-0.225626	0.496	0.512	0.0160003	down
CM vs HM	4 - Mono	4a - CD14+ Mono	PPP1R12A	7.44622e-07	0.125111	0.396	0.308	0.0161419	up
CM vs HM	4 - Mono	4a - CD14+ Mono	NSD3	7.45695e-07	0.0787079	0.234	0.164	0.0161652	up
CM vs HM	4 - Mono	4a - CD14+ Mono	ZFP36L2	7.53925e-07	0.178021	0.57	0.477	0.0163436	up
CM vs HM	4 - Mono	4a - CD14+ Mono	RCBTB2	7.58599e-07	0.113842	0.256	0.185	0.0164449	up
CM vs HM	4 - Mono	4a - CD14+ Mono	ST13	7.58634e-07	-0.208457	0.449	0.473	0.0164457	down
CM vs HM	4 - Mono	4a - CD14+ Mono	EP300	7.62626e-07	0.116093	0.286	0.209	0.0165322	up
CM vs HM	4 - Mono	4a - CD14+ Mono	RNF126	7.63814e-07	0.0744547	0.102	0.06	0.016558	up
CM vs HM	4 - Mono	4a - CD14+ Mono	CFAP410	7.68763e-07	0.0782679	0.08	0.043	0.0166652	up
CM vs HM	4 - Mono	4a - CD14+ Mono	MAFG	7.69378e-07	0.0746471	0.141	0.09	0.0166786	up
CM vs HM	4 - Mono	4a - CD14+ Mono	USP8	7.75767e-07	0.142045	0.324	0.244	0.0168171	up
CM vs HM	4 - Mono	4a - CD14+ Mono	TIMM29	7.76643e-07	0.0564014	0.035	0.012	0.0168361	up
CM vs HM	4 - Mono	4a - CD14+ Mono	KPNA1	7.79444e-07	0.0927237	0.131	0.083	0.0168968	up
CM vs HM	4 - Mono	4a - CD14+ Mono	SERPINB1	7.79945e-07	0.127692	0.858	0.826	0.0169076	up
CM vs HM	4 - Mono	4a - CD14+ Mono	FCGR3B	7.82795e-07	-0.0409547	0.001	0.012	0.0169694	down
CM vs HM	4 - Mono	4a - CD14+ Mono	ME2	7.96388e-07	0.0822282	0.201	0.138	0.0172641	up
CM vs HM	4 - Mono	4a - CD14+ Mono	AL512625.3	8.18759e-07	0.0628668	0.05	0.022	0.0177491	up
CM vs HM	4 - Mono	4a - CD14+ Mono	ABHD14B	8.21246e-07	-0.210414	0.175	0.217	0.017803	down
CM vs HM	4 - Mono	4a - CD14+ Mono	TOR3A	8.22286e-07	0.0790701	0.126	0.079	0.0178255	up
CM vs HM	4 - Mono	4a - CD14+ Mono	ETFB	8.33102e-07	0.137987	0.45	0.354	0.01806	up
CM vs HM	4 - Mono	4a - CD14+ Mono	BPTF	8.48632e-07	0.110749	0.352	0.269	0.0183966	up
CM vs HM	4 - Mono	4a - CD14+ Mono	DMXL1	8.50121e-07	0.0901226	0.153	0.101	0.0184289	up
CM vs HM	4 - Mono	4a - CD14+ Mono	CA2	8.50789e-07	0.0556222	0.073	0.038	0.0184434	up
CM vs HM	4 - Mono	4a - CD14+ Mono	FAM126A	8.70762e-07	0.0686889	0.096	0.055	0.0188764	up
CM vs HM	4 - Mono	4a - CD14+ Mono	XIAP	8.71886e-07	0.1049	0.162	0.108	0.0189008	up
CM vs HM	4 - Mono	4a - CD14+ Mono	MDM2	8.7211e-07	0.0707976	0.177	0.12	0.0189056	up
CM vs HM	4 - Mono	4a - CD14+ Mono	PGLYRP2	8.99976e-07	0.0438908	0.015	0.001	0.0195097	up
CM vs HM	4 - Mono	4a - CD14+ Mono	ABHD2	9.02564e-07	0.120122	0.258	0.187	0.0195658	up
CM vs HM	4 - Mono	4a - CD14+ Mono	UQCRQ	9.0779e-07	0.146673	0.731	0.65	0.0196791	up
CM vs HM	4 - Mono	4a - CD14+ Mono	LIMD2	9.0837e-07	-0.164838	0.789	0.818	0.0196916	down
CM vs HM	4 - Mono	4a - CD14+ Mono	SEPTIN9	9.21225e-07	-0.186785	0.582	0.6	0.0199703	down
CM vs HM	4 - Mono	4a - CD14+ Mono	PDXK	9.23244e-07	0.123831	0.215	0.152	0.0200141	up
CM vs HM	4 - Mono	4a - CD14+ Mono	AC011939.2	9.27235e-07	0.0480556	0.017	0.002	0.0201006	up
CM vs HM	4 - Mono	4a - CD14+ Mono	INTS1	9.27474e-07	0.0972383	0.136	0.087	0.0201058	up
CM vs HM	4 - Mono	4a - CD14+ Mono	TNRC6B	9.46301e-07	0.12824	0.35	0.268	0.0205139	up
CM vs HM	4 - Mono	4a - CD14+ Mono	BRAT1	9.48376e-07	0.0988675	0.168	0.113	0.0205589	up
CM vs HM	4 - Mono	4a - CD14+ Mono	CD84	9.49303e-07	0.0667736	0.195	0.135	0.020579	up
CM vs HM	4 - Mono	4a - CD14+ Mono	TPCN2	9.5482e-07	0.0725278	0.088	0.05	0.0206986	up
CM vs HM	4 - Mono	4a - CD14+ Mono	TNFSF12	9.56164e-07	0.0429525	0.125	0.077	0.0207277	up
CM vs HM	4 - Mono	4a - CD14+ Mono	PTBP3	9.59794e-07	0.12273	0.388	0.3	0.0208064	up
CM vs HM	4 - Mono	4a - CD14+ Mono	SLC22A16	9.66246e-07	-0.0783389	0.013	0.034	0.0209463	down
CM vs HM	4 - Mono	4a - CD14+ Mono	MIEN1	1.00755e-06	0.109676	0.489	0.383	0.0218417	up
CM vs HM	4 - Mono	4a - CD14+ Mono	SLC12A9	1.02341e-06	0.0859716	0.194	0.134	0.0221855	up
CM vs HM	4 - Mono	4a - CD14+ Mono	PHACTR1	1.027e-06	-0.125071	0.116	0.162	0.0222633	down
CM vs HM	4 - Mono	4a - CD14+ Mono	ARL5B	1.02799e-06	0.0852988	0.077	0.042	0.0222849	up
CM vs HM	4 - Mono	4a - CD14+ Mono	LZIC	1.05018e-06	0.101682	0.217	0.152	0.0227658	up
CM vs HM	4 - Mono	4a - CD14+ Mono	MED18	1.05426e-06	0.067352	0.04	0.016	0.0228543	up
CM vs HM	4 - Mono	4a - CD14+ Mono	CLEC5A	1.05978e-06	0.0937179	0.036	0.013	0.0229739	up
CM vs HM	4 - Mono	4a - CD14+ Mono	ATF7IP	1.06653e-06	0.111739	0.256	0.187	0.0231202	up
CM vs HM	4 - Mono	4a - CD14+ Mono	VDAC1	1.06899e-06	0.119889	0.362	0.277	0.0231735	up
CM vs HM	4 - Mono	4a - CD14+ Mono	CLEC7A	1.08681e-06	-0.148738	0.748	0.751	0.0235599	down
CM vs HM	4 - Mono	4a - CD14+ Mono	VHL	1.09564e-06	0.0883959	0.212	0.149	0.0237513	up
CM vs HM	4 - Mono	4a - CD14+ Mono	VSIR	1.12349e-06	0.113643	0.872	0.852	0.024355	up
CM vs HM	4 - Mono	4a - CD14+ Mono	AC079630.1	1.12876e-06	0.0490558	0.024	0.006	0.0244693	up
CM vs HM	4 - Mono	4a - CD14+ Mono	SPATA2	1.12998e-06	0.0655484	0.055	0.026	0.0244957	up
CM vs HM	4 - Mono	4a - CD14+ Mono	IFIT3	1.13044e-06	-0.169989	0.068	0.106	0.0245058	down
CM vs HM	4 - Mono	4a - CD14+ Mono	MLH3	1.13505e-06	0.0730707	0.08	0.044	0.0246056	up
CM vs HM	4 - Mono	4a - CD14+ Mono	EPN1	1.14197e-06	0.083539	0.268	0.193	0.0247556	up
CM vs HM	4 - Mono	4a - CD14+ Mono	PJA2	1.14462e-06	0.122615	0.338	0.252	0.024813	up
CM vs HM	4 - Mono	4a - CD14+ Mono	COX4I1	1.17285e-06	-0.0835464	0.977	0.985	0.0254251	down
CM vs HM	4 - Mono	4a - CD14+ Mono	NBPF14	1.17692e-06	0.122868	0.384	0.297	0.0255132	up
CM vs HM	4 - Mono	4a - CD14+ Mono	NISCH	1.17974e-06	0.0861022	0.22	0.154	0.0255744	up
CM vs HM	4 - Mono	4a - CD14+ Mono	ASRGL1	1.18705e-06	0.0826814	0.167	0.112	0.0257328	up
CM vs HM	4 - Mono	4a - CD14+ Mono	VPS36	1.18979e-06	0.0739218	0.301	0.22	0.0257922	up
CM vs HM	4 - Mono	4a - CD14+ Mono	TSEN15	1.1932e-06	0.0675508	0.06	0.029	0.0258661	up
CM vs HM	4 - Mono	4a - CD14+ Mono	LTB4R2	1.19568e-06	0.0543614	0.027	0.007	0.0259199	up
CM vs HM	4 - Mono	4a - CD14+ Mono	ATP9B	1.20477e-06	0.0699548	0.094	0.054	0.026117	up
CM vs HM	4 - Mono	4a - CD14+ Mono	XBP1	1.21367e-06	0.0858755	0.208	0.146	0.0263098	up
CM vs HM	4 - Mono	4a - CD14+ Mono	DYM	1.22988e-06	0.0905127	0.167	0.112	0.0266614	up
CM vs HM	4 - Mono	4a - CD14+ Mono	BID	1.2509e-06	0.107382	0.46	0.364	0.027117	up
CM vs HM	4 - Mono	4a - CD14+ Mono	RPS6KB2	1.25824e-06	0.0843627	0.272	0.198	0.0272761	up
CM vs HM	4 - Mono	4a - CD14+ Mono	FDX1	1.26084e-06	0.0570854	0.069	0.036	0.0273324	up
CM vs HM	4 - Mono	4a - CD14+ Mono	PHACTR2	1.26158e-06	0.0578051	0.175	0.117	0.0273486	up
CM vs HM	4 - Mono	4a - CD14+ Mono	NFIL3	1.27113e-06	0.05866	0.171	0.114	0.0275556	up
CM vs HM	4 - Mono	4a - CD14+ Mono	HEATR3	1.27113e-06	0.0738544	0.093	0.054	0.0275556	up
CM vs HM	4 - Mono	4a - CD14+ Mono	LRP10	1.27466e-06	0.102134	0.232	0.165	0.0276321	up
CM vs HM	4 - Mono	4a - CD14+ Mono	AGO3	1.28555e-06	0.0802743	0.145	0.094	0.0278682	up
CM vs HM	4 - Mono	4a - CD14+ Mono	NDUFS3	1.2932e-06	0.0865329	0.324	0.241	0.0280341	up
CM vs HM	4 - Mono	4a - CD14+ Mono	TMPO-AS1	1.32227e-06	0.0601813	0.037	0.014	0.0286642	up
CM vs HM	4 - Mono	4a - CD14+ Mono	TACC1	1.32291e-06	0.10796	0.367	0.281	0.028678	up
CM vs HM	4 - Mono	4a - CD14+ Mono	DYNC1H1	1.3387e-06	0.109131	0.435	0.336	0.0290203	up
CM vs HM	4 - Mono	4a - CD14+ Mono	R3HDM4	1.33942e-06	0.114075	0.2	0.14	0.0290359	up
CM vs HM	4 - Mono	4a - CD14+ Mono	BRD2	1.34367e-06	-0.205178	0.434	0.461	0.0291281	down
CM vs HM	4 - Mono	4a - CD14+ Mono	APH1A	1.34541e-06	-0.206815	0.409	0.432	0.0291658	down
CM vs HM	4 - Mono	4a - CD14+ Mono	TACO1	1.34621e-06	0.0406806	0.059	0.029	0.0291832	up
CM vs HM	4 - Mono	4a - CD14+ Mono	KDM4B	1.35135e-06	0.0969368	0.133	0.085	0.0292946	up
CM vs HM	4 - Mono	4a - CD14+ Mono	H2AFX	1.36319e-06	0.0593841	0.05	0.022	0.0295512	up
CM vs HM	4 - Mono	4a - CD14+ Mono	SMG6	1.38239e-06	0.106318	0.075	0.041	0.0299675	up
CM vs HM	4 - Mono	4a - CD14+ Mono	C2orf76	1.38348e-06	0.0576247	0.084	0.046	0.029991	up
CM vs HM	4 - Mono	4a - CD14+ Mono	XPC	1.40036e-06	0.0866027	0.16	0.107	0.0303569	up
CM vs HM	4 - Mono	4a - CD14+ Mono	ARHGAP31	1.40508e-06	0.0778491	0.093	0.054	0.0304594	up
CM vs HM	4 - Mono	4a - CD14+ Mono	KLHL2	1.40864e-06	0.0732032	0.072	0.038	0.0305365	up
CM vs HM	4 - Mono	4a - CD14+ Mono	RSL24D1	1.43528e-06	-0.197159	0.473	0.493	0.0311141	down
CM vs HM	4 - Mono	4a - CD14+ Mono	AP2A2	1.46889e-06	0.0683857	0.152	0.099	0.0318425	up
CM vs HM	4 - Mono	4a - CD14+ Mono	SURF2	1.47889e-06	0.0530669	0.161	0.106	0.0320593	up
CM vs HM	4 - Mono	4a - CD14+ Mono	TASOR	1.48696e-06	0.0900593	0.248	0.178	0.0322343	up
CM vs HM	4 - Mono	4a - CD14+ Mono	SLC15A3	1.53537e-06	0.106745	0.318	0.236	0.0332838	up
CM vs HM	4 - Mono	4a - CD14+ Mono	RPN1	1.54649e-06	-0.211747	0.414	0.438	0.0335247	down
CM vs HM	4 - Mono	4a - CD14+ Mono	UTP23	1.57019e-06	0.0808256	0.149	0.098	0.0340386	up
CM vs HM	4 - Mono	4a - CD14+ Mono	PIGF	1.59167e-06	0.0898967	0.114	0.07	0.0345043	up
CM vs HM	4 - Mono	4a - CD14+ Mono	USP6NL	1.60017e-06	0.0417246	0.049	0.022	0.0346885	up
CM vs HM	4 - Mono	4a - CD14+ Mono	NDUFA1	1.61167e-06	0.132514	0.75	0.655	0.0349378	up
CM vs HM	4 - Mono	4a - CD14+ Mono	UBASH3B	1.6234e-06	0.0603696	0.068	0.036	0.035192	up
CM vs HM	4 - Mono	4a - CD14+ Mono	TSC22D2	1.62836e-06	0.0940289	0.089	0.051	0.0352997	up
CM vs HM	4 - Mono	4a - CD14+ Mono	MYLIP	1.63467e-06	-0.15544	0.07	0.107	0.0354364	down
CM vs HM	4 - Mono	4a - CD14+ Mono	MOB3A	1.64565e-06	0.112955	0.452	0.357	0.0356745	up
CM vs HM	4 - Mono	4a - CD14+ Mono	NDUFAF6	1.66649e-06	0.0570625	0.029	0.009	0.0361261	up
CM vs HM	4 - Mono	4a - CD14+ Mono	CLTB	1.68708e-06	0.0911043	0.142	0.092	0.0365725	up
CM vs HM	4 - Mono	4a - CD14+ Mono	MSR1	1.7168e-06	-0.0625199	0.011	0.03	0.0372169	down
CM vs HM	4 - Mono	4a - CD14+ Mono	BDP1	1.76156e-06	0.0890338	0.23	0.164	0.038187	up
CM vs HM	4 - Mono	4a - CD14+ Mono	TMEM170A	1.76532e-06	0.0542203	0.164	0.108	0.0382686	up
CM vs HM	4 - Mono	4a - CD14+ Mono	ARHGAP5	1.76903e-06	0.0602754	0.058	0.029	0.0383491	up
CM vs HM	4 - Mono	4a - CD14+ Mono	U2AF1	1.77641e-06	0.110866	0.256	0.187	0.038509	up
CM vs HM	4 - Mono	4a - CD14+ Mono	TET2	1.80643e-06	0.139512	0.384	0.297	0.0391598	up
CM vs HM	4 - Mono	4a - CD14+ Mono	SLFN12	1.80762e-06	0.0791416	0.128	0.081	0.0391855	up
CM vs HM	4 - Mono	4a - CD14+ Mono	SCYL1	1.80898e-06	0.0672092	0.185	0.126	0.039215	up
CM vs HM	4 - Mono	4a - CD14+ Mono	VPS37B	1.81816e-06	0.115681	0.204	0.143	0.039414	up
CM vs HM	4 - Mono	4a - CD14+ Mono	RBP7	1.82039e-06	0.117622	0.563	0.467	0.0394624	up
CM vs HM	4 - Mono	4a - CD14+ Mono	DPP9	1.84274e-06	0.0644824	0.127	0.08	0.039947	up
CM vs HM	4 - Mono	4a - CD14+ Mono	RUBCN	1.8614e-06	0.0588795	0.087	0.049	0.0403515	up
CM vs HM	4 - Mono	4a - CD14+ Mono	SMOX	1.87647e-06	0.0611328	0.029	0.009	0.0406782	up
CM vs HM	4 - Mono	4a - CD14+ Mono	LYPLA1	1.88504e-06	0.0949798	0.348	0.264	0.0408638	up
CM vs HM	4 - Mono	4a - CD14+ Mono	ANKIB1	1.90059e-06	0.0754334	0.098	0.059	0.0412011	up
CM vs HM	4 - Mono	4a - CD14+ Mono	RAC2	1.9104e-06	-0.145649	0.787	0.779	0.0414136	down
CM vs HM	4 - Mono	4a - CD14+ Mono	PLAGL1	1.91096e-06	0.0712422	0.099	0.059	0.0414258	up
CM vs HM	4 - Mono	4a - CD14+ Mono	CMIP	1.91865e-06	0.09249	0.29	0.213	0.0415926	up
CM vs HM	4 - Mono	4a - CD14+ Mono	POMZP3	1.92522e-06	0.0503969	0.033	0.011	0.041735	up
CM vs HM	4 - Mono	4a - CD14+ Mono	PBRM1	1.92542e-06	0.104768	0.214	0.151	0.0417392	up
CM vs HM	4 - Mono	4a - CD14+ Mono	DEDD2	1.94847e-06	0.0698819	0.215	0.151	0.0422389	up
CM vs HM	4 - Mono	4a - CD14+ Mono	IDI1	2.00183e-06	0.0903774	0.193	0.134	0.0433956	up
CM vs HM	4 - Mono	4a - CD14+ Mono	USP47	2.00621e-06	0.0918096	0.162	0.109	0.0434907	up
CM vs HM	4 - Mono	4a - CD14+ Mono	ALG2	2.0201e-06	0.0570632	0.073	0.039	0.0437917	up
CM vs HM	4 - Mono	4a - CD14+ Mono	LSS	2.02687e-06	0.0524803	0.039	0.015	0.0439386	up
CM vs HM	4 - Mono	4a - CD14+ Mono	ARRDC3	2.03905e-06	0.0702728	0.112	0.07	0.0442025	up
CM vs HM	4 - Mono	4a - CD14+ Mono	CIITA	2.05672e-06	-0.175154	0.159	0.203	0.0445856	down
CM vs HM	4 - Mono	4a - CD14+ Mono	ARMH1	2.07398e-06	0.0812895	0.175	0.12	0.0449597	up
CM vs HM	4 - Mono	4a - CD14+ Mono	HINT1	2.08007e-06	-0.167977	0.792	0.797	0.0450918	down
CM vs HM	4 - Mono	4a - CD14+ Mono	AC099343.3	2.08595e-06	0.0553916	0.035	0.013	0.0452193	up
CM vs HM	4 - Mono	4a - CD14+ Mono	ME1	2.0969e-06	0.0433742	0.022	0.005	0.0454566	up
CM vs HM	4 - Mono	4a - CD14+ Mono	ELP5	2.10235e-06	-0.16924	0.105	0.144	0.0455748	down
CM vs HM	4 - Mono	4a - CD14+ Mono	NEK9	2.10639e-06	0.0722058	0.149	0.098	0.0456623	up
CM vs HM	4 - Mono	4a - CD14+ Mono	IKBKG	2.11423e-06	0.0824473	0.222	0.158	0.0458322	up
CM vs HM	4 - Mono	4a - CD14+ Mono	PPM1A	2.12788e-06	0.0681457	0.124	0.078	0.0461282	up
CM vs HM	4 - Mono	4a - CD14+ Mono	RASAL3	2.14094e-06	0.0735791	0.098	0.058	0.0464112	up
CM vs HM	4 - Mono	4a - CD14+ Mono	MRPL11	2.14126e-06	0.0729201	0.251	0.179	0.0464182	up
CM vs HM	4 - Mono	4a - CD14+ Mono	DOK3	2.15615e-06	0.0892079	0.438	0.34	0.046741	up
CM vs HM	4 - Mono	4a - CD14+ Mono	SNX21	2.16742e-06	0.058116	0.054	0.026	0.0469852	up
CM vs HM	4 - Mono	4a - CD14+ Mono	ZBTB1	2.22038e-06	0.0711152	0.111	0.068	0.0481333	up
CM vs HM	4 - Mono	4a - CD14+ Mono	SYNCRIP	2.23207e-06	0.106508	0.29	0.215	0.0483868	up
CM vs HM	4 - Mono	4a - CD14+ Mono	GIMAP2	2.25928e-06	-0.209553	0.195	0.235	0.0489766	down
CM vs HM	4 - Mono	4a - CD14+ Mono	REL	2.26801e-06	0.122591	0.467	0.371	0.0491659	up
CM vs HM	4 - Mono	4a - CD14+ Mono	SLC2A3	2.26804e-06	0.0966714	0.596	0.499	0.0491665	up
CM vs HM	4 - Mono	4a - CD14+ Mono	NCL	2.2846e-06	0.131994	0.649	0.55	0.0495255	up
CM vs HM	4 - Mono	4a - CD14+ Mono	PBDC1	2.29305e-06	0.0951276	0.13	0.083	0.0497088	up
CM vs HM	4 - Mono	4a - CD14+ Mono	CHMP2A	2.29683e-06	0.136933	0.569	0.461	0.0497907	up
CM vs HM	4 - Mono	4b - Int Mono	MT-CO2	3.75789e-51	-0.924164	0.996	1	8.14634e-47	down
[truncated: 4,439 more rows]

## Sheet: Full_DEG_List_CB1_vs_HB1
comparison_group	major_cell_type	minor_cell_type	gene_name	p_val	avg_log2FC	pct.1	pct.2	p_val_adj	trend
CB1 vs HB1	1 - Erythroid	/	RRM2	5.3059e-87	-1.56623	0.008	0.307	1.15021e-82	down
CB1 vs HB1	1 - Erythroid	/	PCLAF	6.69327e-86	-1.65774	0.01	0.318	1.45097e-81	down
CB1 vs HB1	1 - Erythroid	/	TUBA1B	2.58414e-84	-3.586	0.065	0.516	5.60189e-80	down
CB1 vs HB1	1 - Erythroid	/	BIRC5	2.53089e-79	-1.30995	0.01	0.297	5.48646e-75	down
CB1 vs HB1	1 - Erythroid	/	CDC20	8.29638e-76	-1.84416	0.012	0.297	1.79849e-71	down
CB1 vs HB1	1 - Erythroid	/	PTTG1	6.03656e-74	-2.06268	0.047	0.438	1.3086e-69	down
CB1 vs HB1	1 - Erythroid	/	ATP5IF1	7.97734e-74	-2.04013	0.026	0.359	1.72933e-69	down
CB1 vs HB1	1 - Erythroid	/	CDKN3	8.68509e-71	-1.32778	0.01	0.276	1.88275e-66	down
CB1 vs HB1	1 - Erythroid	/	DHFR	2.46548e-69	-1.03655	0.003	0.219	5.34467e-65	down
CB1 vs HB1	1 - Erythroid	/	HEBP1	1.06697e-68	-1.28145	0.016	0.297	2.31297e-64	down
CB1 vs HB1	1 - Erythroid	/	H2AFZ	1.6567e-67	-1.83186	0.025	0.333	3.59139e-63	down
CB1 vs HB1	1 - Erythroid	/	NDUFS5	1.88824e-67	-1.46314	0.012	0.271	4.09332e-63	down
CB1 vs HB1	1 - Erythroid	/	TUBB	5.988e-67	-2.74039	0.076	0.484	1.29808e-62	down
CB1 vs HB1	1 - Erythroid	/	MCM7	8.17469e-66	-1.28025	0.014	0.276	1.77211e-61	down
CB1 vs HB1	1 - Erythroid	/	RAN	2.08763e-65	-2.33187	0.07	0.464	4.52558e-61	down
CB1 vs HB1	1 - Erythroid	/	HMGN2	3.68862e-65	-2.5108	0.076	0.474	7.99619e-61	down
CB1 vs HB1	1 - Erythroid	/	HMGB2	1.33985e-63	-2.47422	0.065	0.453	2.90453e-59	down
CB1 vs HB1	1 - Erythroid	/	HMGA1	1.05999e-62	-1.71811	0.017	0.281	2.29784e-58	down
CB1 vs HB1	1 - Erythroid	/	CCNB1	5.80651e-62	-1.65502	0.014	0.271	1.25873e-57	down
CB1 vs HB1	1 - Erythroid	/	DLGAP5	8.20205e-62	-1.0728	0.008	0.234	1.77804e-57	down
CB1 vs HB1	1 - Erythroid	/	PRDX3	2.21227e-61	-1.00545	0.011	0.25	4.79575e-57	down
CB1 vs HB1	1 - Erythroid	/	NUSAP1	2.46369e-61	-1.51923	0.011	0.25	5.34078e-57	down
CB1 vs HB1	1 - Erythroid	/	TROAP	3.09827e-60	-1.20791	0.01	0.24	6.71643e-56	down
CB1 vs HB1	1 - Erythroid	/	MZT1	3.9853e-60	-1.22246	0.016	0.271	8.63932e-56	down
CB1 vs HB1	1 - Erythroid	/	DEK	3.93379e-59	-1.32674	0.032	0.333	8.52766e-55	down
CB1 vs HB1	1 - Erythroid	/	SKA2	4.4201e-59	-0.898975	0.011	0.245	9.58189e-55	down
CB1 vs HB1	1 - Erythroid	/	CENPW	4.89311e-59	-0.845191	0.005	0.208	1.06073e-54	down
CB1 vs HB1	1 - Erythroid	/	TMPO	6.82234e-59	-1.34385	0.019	0.281	1.47895e-54	down
CB1 vs HB1	1 - Erythroid	/	CCNB2	6.86521e-59	-1.27981	0.011	0.245	1.48824e-54	down
CB1 vs HB1	1 - Erythroid	/	MAD2L1	1.81552e-58	-0.688103	0.003	0.193	3.93568e-54	down
CB1 vs HB1	1 - Erythroid	/	SNHG6	3.44542e-58	-0.853819	0.01	0.234	7.46898e-54	down
CB1 vs HB1	1 - Erythroid	/	NME4	1.00628e-57	-1.61814	0.056	0.401	2.18141e-53	down
CB1 vs HB1	1 - Erythroid	/	SNRPB	1.90895e-57	-1.04184	0.012	0.245	4.13823e-53	down
CB1 vs HB1	1 - Erythroid	/	IDH2	4.49305e-57	-1.71491	0.03	0.318	9.74004e-53	down
CB1 vs HB1	1 - Erythroid	/	PRC1	5.88719e-57	-1.1016	0.008	0.219	1.27623e-52	down
CB1 vs HB1	1 - Erythroid	/	FEN1	6.50965e-57	-0.716227	0.001	0.167	1.41116e-52	down
CB1 vs HB1	1 - Erythroid	/	SLC25A3	9.2222e-57	-1.31255	0.043	0.365	1.99919e-52	down
CB1 vs HB1	1 - Erythroid	/	HINT1	6.634e-56	-1.92293	0.078	0.448	1.43812e-51	down
CB1 vs HB1	1 - Erythroid	/	SNCA	1.53753e-55	1.08549	0.994	0.828	3.33306e-51	up
CB1 vs HB1	1 - Erythroid	/	DTYMK	3.54917e-55	-0.628043	0.001	0.161	7.69389e-51	down
CB1 vs HB1	1 - Erythroid	/	DNAJC9	6.39967e-55	-1.11664	0.014	0.245	1.38732e-50	down
CB1 vs HB1	1 - Erythroid	/	EIF4A1	7.01326e-55	-1.80832	0.054	0.385	1.52033e-50	down
CB1 vs HB1	1 - Erythroid	/	NDUFS8	1.29665e-54	-1.14153	0.029	0.307	2.81089e-50	down
CB1 vs HB1	1 - Erythroid	/	CYC1	4.9667e-54	-0.872585	0.008	0.208	1.07668e-49	down
CB1 vs HB1	1 - Erythroid	/	HSP90AA1	1.97885e-53	-2.3193	0.12	0.521	4.28976e-49	down
CB1 vs HB1	1 - Erythroid	/	TPX2	3.49507e-53	-1.29046	0.017	0.255	7.57662e-49	down
CB1 vs HB1	1 - Erythroid	/	LSM5	4.61324e-53	-0.921258	0.012	0.229	1.00006e-48	down
CB1 vs HB1	1 - Erythroid	/	SLC43A3	4.73718e-53	-0.660787	0.001	0.161	1.02693e-48	down
CB1 vs HB1	1 - Erythroid	/	LSM4	1.05507e-52	-0.777388	0.006	0.193	2.28719e-48	down
CB1 vs HB1	1 - Erythroid	/	S100A6	1.36645e-52	-2.92469	0.057	0.38	2.96219e-48	down
CB1 vs HB1	1 - Erythroid	/	SRI	1.62833e-52	-1.22274	0.016	0.245	3.52988e-48	down
CB1 vs HB1	1 - Erythroid	/	DCAF12	4.41359e-52	1.37214	0.963	0.573	9.56778e-48	up
CB1 vs HB1	1 - Erythroid	/	RPA3	6.14798e-52	-1.09907	0.018	0.255	1.33276e-47	down
CB1 vs HB1	1 - Erythroid	/	RRM1	3.29399e-51	-0.680314	0.003	0.167	7.14072e-47	down
CB1 vs HB1	1 - Erythroid	/	CENPF	5.84248e-51	-1.37754	0.013	0.229	1.26653e-46	down
CB1 vs HB1	1 - Erythroid	/	RPS20	7.49033e-51	-1.54572	0.063	0.391	1.62375e-46	down
CB1 vs HB1	1 - Erythroid	/	SSRP1	1.1589e-50	-0.733832	0.008	0.203	2.51226e-46	down
CB1 vs HB1	1 - Erythroid	/	ANAPC11	1.39781e-50	-1.31178	0.039	0.328	3.03018e-46	down
CB1 vs HB1	1 - Erythroid	/	BNIP3L	2.652e-50	1.14069	0.986	0.729	5.74901e-46	up
CB1 vs HB1	1 - Erythroid	/	HMMR	3.55572e-50	-1.01031	0.012	0.224	7.70809e-46	down
CB1 vs HB1	1 - Erythroid	/	PLK1	4.36063e-50	-1.00052	0.005	0.182	9.45297e-46	down
CB1 vs HB1	1 - Erythroid	/	UQCRQ	4.39914e-50	-1.12467	0.023	0.271	9.53645e-46	down
CB1 vs HB1	1 - Erythroid	/	PCNA	1.21868e-49	-0.708228	0.003	0.167	2.64186e-45	down
CB1 vs HB1	1 - Erythroid	/	GMNN	1.82496e-49	-0.621915	0.002	0.156	3.95616e-45	down
CB1 vs HB1	1 - Erythroid	/	UBE2T	2.07945e-49	-0.696514	0.003	0.167	4.50784e-45	down
CB1 vs HB1	1 - Erythroid	/	NUCKS1	2.2322e-49	-1.27152	0.028	0.286	4.83895e-45	down
CB1 vs HB1	1 - Erythroid	/	TUBG1	4.47995e-49	-1.31879	0.029	0.286	9.71163e-45	down
CB1 vs HB1	1 - Erythroid	/	CCNA2	8.85418e-49	-1.01274	0.01	0.208	1.91941e-44	down
CB1 vs HB1	1 - Erythroid	/	KPNA2	1.12696e-48	-0.906381	0.016	0.234	2.44303e-44	down
CB1 vs HB1	1 - Erythroid	/	ATP5F1A	1.17477e-48	-1.34202	0.045	0.339	2.54667e-44	down
CB1 vs HB1	1 - Erythroid	/	CAST	1.23027e-48	-1.05791	0.025	0.271	2.66699e-44	down
CB1 vs HB1	1 - Erythroid	/	IFIT1B	1.26181e-48	1.9928	0.848	0.323	2.73534e-44	up
CB1 vs HB1	1 - Erythroid	/	PSMB3	2.32203e-48	-1.00828	0.032	0.297	5.0337e-44	down
CB1 vs HB1	1 - Erythroid	/	NUF2	2.51973e-48	-0.725797	0.005	0.177	5.46227e-44	down
CB1 vs HB1	1 - Erythroid	/	ATP5MC3	2.54217e-48	-1.46079	0.03	0.286	5.51092e-44	down
CB1 vs HB1	1 - Erythroid	/	HNRNPR	2.80126e-48	-0.967795	0.02	0.25	6.07258e-44	down
CB1 vs HB1	1 - Erythroid	/	RANBP1	3.27929e-48	-0.984217	0.009	0.198	7.10885e-44	down
CB1 vs HB1	1 - Erythroid	/	TUBB6	3.30602e-48	-0.821039	0.01	0.203	7.16679e-44	down
CB1 vs HB1	1 - Erythroid	/	HMGB1	8.78814e-48	-2.66628	0.109	0.469	1.90509e-43	down
CB1 vs HB1	1 - Erythroid	/	CSE1L	1.19906e-47	-0.492803	0.002	0.151	2.59933e-43	down
CB1 vs HB1	1 - Erythroid	/	ENOSF1	1.30646e-47	-0.602141	0.002	0.151	2.83215e-43	down
CB1 vs HB1	1 - Erythroid	/	NCAPG	1.73041e-47	-0.755992	0.007	0.188	3.75119e-43	down
CB1 vs HB1	1 - Erythroid	/	DUT	1.81244e-47	-1.37973	0.018	0.24	3.92901e-43	down
CB1 vs HB1	1 - Erythroid	/	PRELID1	3.08821e-47	-0.776541	0.006	0.177	6.69461e-43	down
CB1 vs HB1	1 - Erythroid	/	BOLA3	6.48489e-47	-1.19929	0.026	0.271	1.40579e-42	down
CB1 vs HB1	1 - Erythroid	/	ILF2	1.95127e-46	-0.988048	0.025	0.266	4.22997e-42	down
CB1 vs HB1	1 - Erythroid	/	ATP5MC1	2.3783e-46	-0.760619	0.01	0.198	5.15569e-42	down
CB1 vs HB1	1 - Erythroid	/	POLR2L	2.39832e-46	-1.25491	0.101	0.469	5.19907e-42	down
CB1 vs HB1	1 - Erythroid	/	LRRC59	4.11564e-46	-0.534901	0.007	0.182	8.92189e-42	down
CB1 vs HB1	1 - Erythroid	/	HMGB3	5.73284e-46	-0.680247	0.01	0.198	1.24276e-41	down
CB1 vs HB1	1 - Erythroid	/	UBE2C	6.59276e-46	-0.827918	0.002	0.146	1.42918e-41	down
CB1 vs HB1	1 - Erythroid	/	MCM4	6.97937e-46	-0.673623	0.002	0.146	1.51299e-41	down
CB1 vs HB1	1 - Erythroid	/	SNRPD2	8.57832e-46	-1.38511	0.056	0.354	1.85961e-41	down
CB1 vs HB1	1 - Erythroid	/	TUBA1C	9.42629e-46	-1.46799	0.029	0.276	2.04343e-41	down
CB1 vs HB1	1 - Erythroid	/	CCT7	1.0828e-45	-0.965865	0.028	0.271	2.3473e-41	down
CB1 vs HB1	1 - Erythroid	/	FDPS	1.62579e-45	-0.686787	0.006	0.172	3.52439e-41	down
CB1 vs HB1	1 - Erythroid	/	HLTF	2.28712e-45	-0.738379	0.014	0.214	4.95802e-41	down
CB1 vs HB1	1 - Erythroid	/	RPS21	3.74459e-45	-2.93641	0.137	0.5	8.11753e-41	down
CB1 vs HB1	1 - Erythroid	/	LSM3	3.78033e-45	-0.836552	0.021	0.245	8.195e-41	down
CB1 vs HB1	1 - Erythroid	/	CDCA8	6.24324e-45	-0.722813	0.005	0.167	1.35341e-40	down
CB1 vs HB1	1 - Erythroid	/	SRSF2	8.40575e-45	-1.03326	0.013	0.208	1.8222e-40	down
CB1 vs HB1	1 - Erythroid	/	SRSF7	1.32748e-44	-0.962518	0.011	0.198	2.87771e-40	down
CB1 vs HB1	1 - Erythroid	/	MRPL51	1.44027e-44	-0.88578	0.019	0.234	3.12223e-40	down
CB1 vs HB1	1 - Erythroid	/	DEPDC1B	2.82199e-44	-0.715638	0.003	0.151	6.11752e-40	down
CB1 vs HB1	1 - Erythroid	/	ANP32E	8.3848e-44	-1.06313	0.037	0.297	1.81766e-39	down
CB1 vs HB1	1 - Erythroid	/	SNRPF	2.02721e-43	-0.731798	0.01	0.188	4.39458e-39	down
CB1 vs HB1	1 - Erythroid	/	PPM1G	2.11307e-43	-0.661968	0.005	0.161	4.58071e-39	down
CB1 vs HB1	1 - Erythroid	/	CCT5	2.23077e-43	-1.09903	0.023	0.245	4.83586e-39	down
CB1 vs HB1	1 - Erythroid	/	RPL27	1.00913e-42	-2.09888	0.103	0.438	2.18759e-38	down
CB1 vs HB1	1 - Erythroid	/	RUVBL2	1.09967e-42	-0.507699	0.004	0.151	2.38387e-38	down
CB1 vs HB1	1 - Erythroid	/	RPS26	1.12753e-42	-1.96177	0.296	0.708	2.44426e-38	down
CB1 vs HB1	1 - Erythroid	/	EIF3F	1.13201e-42	-1.30322	0.041	0.302	2.45398e-38	down
CB1 vs HB1	1 - Erythroid	/	HACD3	1.53039e-42	-0.621569	0.003	0.146	3.31759e-38	down
CB1 vs HB1	1 - Erythroid	/	MCM5	2.33682e-42	-0.749158	0.008	0.177	5.06575e-38	down
CB1 vs HB1	1 - Erythroid	/	ACAT2	2.41781e-42	-0.454981	0.003	0.141	5.24133e-38	down
CB1 vs HB1	1 - Erythroid	/	SLC29A1	2.62439e-42	-0.623796	0.003	0.141	5.68915e-38	down
CB1 vs HB1	1 - Erythroid	/	CDCA3	2.65683e-42	-0.450472	0.001	0.13	5.75948e-38	down
CB1 vs HB1	1 - Erythroid	/	HADH	3.13332e-42	-0.47177	0.002	0.135	6.79241e-38	down
CB1 vs HB1	1 - Erythroid	/	PPIA	7.47174e-42	-2.55508	0.099	0.422	1.61972e-37	down
CB1 vs HB1	1 - Erythroid	/	PSMC5	1.11971e-41	-0.821785	0.019	0.224	2.42732e-37	down
CB1 vs HB1	1 - Erythroid	/	TOMM5	1.14714e-41	-0.903791	0.02	0.229	2.48676e-37	down
CB1 vs HB1	1 - Erythroid	/	CBX5	1.73371e-41	-0.574347	0.008	0.172	3.75833e-37	down
CB1 vs HB1	1 - Erythroid	/	PRKDC	2.29698e-41	-0.742968	0.011	0.188	4.9794e-37	down
CB1 vs HB1	1 - Erythroid	/	SRSF3	2.37215e-41	-1.28316	0.039	0.292	5.14236e-37	down
CB1 vs HB1	1 - Erythroid	/	BUB1	2.37661e-41	-0.519853	0.005	0.156	5.15201e-37	down
CB1 vs HB1	1 - Erythroid	/	UQCC2	3.54557e-41	-0.508082	0.005	0.151	7.68608e-37	down
CB1 vs HB1	1 - Erythroid	/	HSPD1	3.58293e-41	-1.17369	0.022	0.234	7.76708e-37	down
CB1 vs HB1	1 - Erythroid	/	MGST3	4.14189e-41	-2.20883	0.189	0.562	8.97879e-37	down
CB1 vs HB1	1 - Erythroid	/	TYMS	4.25979e-41	-0.622269	0.005	0.151	9.23438e-37	down
CB1 vs HB1	1 - Erythroid	/	SGO2	4.55356e-41	-0.607765	0.005	0.151	9.87121e-37	down
CB1 vs HB1	1 - Erythroid	/	PSMG1	6.16005e-41	-0.413036	0	0.115	1.33538e-36	down
CB1 vs HB1	1 - Erythroid	/	SNRPG	9.13673e-41	-0.964262	0.01	0.182	1.98066e-36	down
CB1 vs HB1	1 - Erythroid	/	PSMA7	1.0136e-40	-1.49777	0.068	0.359	2.19727e-36	down
CB1 vs HB1	1 - Erythroid	/	ATAD2	1.23124e-40	-0.533872	0.003	0.141	2.66907e-36	down
CB1 vs HB1	1 - Erythroid	/	RPL37A	1.27784e-40	-2.55891	0.148	0.5	2.77011e-36	down
CB1 vs HB1	1 - Erythroid	/	MRPS34	1.80965e-40	-0.644264	0.008	0.172	3.92296e-36	down
CB1 vs HB1	1 - Erythroid	/	SPAG5	1.90593e-40	-0.572649	0.002	0.13	4.13168e-36	down
CB1 vs HB1	1 - Erythroid	/	SIVA1	2.05002e-40	-0.668683	0.008	0.172	4.44403e-36	down
CB1 vs HB1	1 - Erythroid	/	DANCR	2.5744e-40	-0.647411	0.006	0.156	5.58078e-36	down
CB1 vs HB1	1 - Erythroid	/	LXN	2.76021e-40	-0.818387	0.012	0.188	5.98359e-36	down
CB1 vs HB1	1 - Erythroid	/	KIFC1	4.27576e-40	-0.649896	0.006	0.156	9.26898e-36	down
CB1 vs HB1	1 - Erythroid	/	METAP2	7.48915e-40	-0.930821	0.022	0.229	1.6235e-35	down
CB1 vs HB1	1 - Erythroid	/	MCM3	1.05162e-39	-0.623841	0.005	0.146	2.2797e-35	down
CB1 vs HB1	1 - Erythroid	/	PSMA2	1.50635e-39	-1.02816	0.047	0.307	3.26546e-35	down
CB1 vs HB1	1 - Erythroid	/	SEM1	1.67233e-39	-0.681523	0.011	0.182	3.62527e-35	down
CB1 vs HB1	1 - Erythroid	/	RANGAP1	1.79699e-39	-0.748763	0.007	0.161	3.89552e-35	down
CB1 vs HB1	1 - Erythroid	/	UROS	1.89406e-39	-1.41747	0.068	0.359	4.10595e-35	down
CB1 vs HB1	1 - Erythroid	/	TSPAN13	2.09073e-39	-0.554047	0.007	0.161	4.53228e-35	down
CB1 vs HB1	1 - Erythroid	/	RPL36A	2.81186e-39	-2.73424	0.172	0.521	6.09554e-35	down
CB1 vs HB1	1 - Erythroid	/	CCT6A	3.32825e-39	-0.858892	0.025	0.24	7.21498e-35	down
CB1 vs HB1	1 - Erythroid	/	XRCC5	3.3745e-39	-1.0135	0.04	0.286	7.31524e-35	down
CB1 vs HB1	1 - Erythroid	/	YWHAQ	3.98687e-39	-0.832766	0.021	0.224	8.64274e-35	down
CB1 vs HB1	1 - Erythroid	/	ELOC	4.1013e-39	-0.792444	0.021	0.224	8.8908e-35	down
CB1 vs HB1	1 - Erythroid	/	MRPS18C	5.35706e-39	-0.538598	0.01	0.177	1.1613e-34	down
CB1 vs HB1	1 - Erythroid	/	KIF23	5.72318e-39	-0.704358	0.003	0.135	1.24067e-34	down
CB1 vs HB1	1 - Erythroid	/	SMC4	6.13375e-39	-1.10011	0.024	0.234	1.32967e-34	down
CB1 vs HB1	1 - Erythroid	/	PKMYT1	6.19082e-39	-0.511515	0.003	0.135	1.34205e-34	down
CB1 vs HB1	1 - Erythroid	/	EIF3L	6.45915e-39	-0.965918	0.037	0.276	1.40021e-34	down
CB1 vs HB1	1 - Erythroid	/	CENPM	7.45432e-39	-0.39671	0.001	0.115	1.61595e-34	down
CB1 vs HB1	1 - Erythroid	/	SEC61G	7.61112e-39	-0.669675	0.026	0.245	1.64994e-34	down
CB1 vs HB1	1 - Erythroid	/	MRPS15	1.40327e-38	-0.678718	0.025	0.24	3.04201e-34	down
CB1 vs HB1	1 - Erythroid	/	SLC25A5	1.56557e-38	-1.44092	0.047	0.302	3.39383e-34	down
CB1 vs HB1	1 - Erythroid	/	IMPDH2	1.83432e-38	-0.765486	0.008	0.161	3.97645e-34	down
CB1 vs HB1	1 - Erythroid	/	LBR	2.18926e-38	-1.00074	0.027	0.245	4.74588e-34	down
CB1 vs HB1	1 - Erythroid	/	HNRNPD	2.23377e-38	-0.581656	0.013	0.188	4.84237e-34	down
CB1 vs HB1	1 - Erythroid	/	RPL35	2.56341e-38	-2.94896	0.176	0.521	5.55696e-34	down
CB1 vs HB1	1 - Erythroid	/	BANF1	2.57003e-38	-0.902083	0.022	0.224	5.57131e-34	down
CB1 vs HB1	1 - Erythroid	/	HINT2	2.98479e-38	-0.563552	0.008	0.161	6.47044e-34	down
CB1 vs HB1	1 - Erythroid	/	H2AFY	4.53944e-38	-0.857925	0.014	0.193	9.84061e-34	down
CB1 vs HB1	1 - Erythroid	/	SNRPC	5.03149e-38	-0.546033	0.011	0.177	1.09073e-33	down
CB1 vs HB1	1 - Erythroid	/	LMNA	5.4302e-38	-0.857475	0.007	0.156	1.17716e-33	down
CB1 vs HB1	1 - Erythroid	/	XRCC6	7.84035e-38	-0.900123	0.025	0.234	1.69963e-33	down
CB1 vs HB1	1 - Erythroid	/	RPS29	8.6025e-38	-1.7057	0.056	0.318	1.86485e-33	down
CB1 vs HB1	1 - Erythroid	/	PHB2	8.62178e-38	-0.894081	0.02	0.214	1.86903e-33	down
CB1 vs HB1	1 - Erythroid	/	ALDOA	9.51496e-38	-1.18175	0.05	0.307	2.06265e-33	down
CB1 vs HB1	1 - Erythroid	/	RACGAP1	9.88587e-38	-0.470634	0.005	0.141	2.14306e-33	down
CB1 vs HB1	1 - Erythroid	/	DDX39A	1.2228e-37	-0.61043	0.009	0.167	2.65079e-33	down
CB1 vs HB1	1 - Erythroid	/	MCM2	1.74983e-37	-0.639149	0.006	0.151	3.79328e-33	down
CB1 vs HB1	1 - Erythroid	/	SMC2	2.04694e-37	-0.532276	0.004	0.135	4.43736e-33	down
CB1 vs HB1	1 - Erythroid	/	KIF20A	3.99368e-37	-0.51955	0.003	0.13	8.65749e-33	down
CB1 vs HB1	1 - Erythroid	/	MRPL57	4.72844e-37	-0.647183	0.01	0.167	1.02503e-32	down
CB1 vs HB1	1 - Erythroid	/	P4HB	9.10678e-37	-0.655427	0.008	0.156	1.97417e-32	down
CB1 vs HB1	1 - Erythroid	/	SNRPD1	1.70648e-36	-0.736273	0.011	0.172	3.69931e-32	down
CB1 vs HB1	1 - Erythroid	/	OXA1L	1.90906e-36	-0.638533	0.016	0.193	4.13846e-32	down
CB1 vs HB1	1 - Erythroid	/	ATP5ME	2.96869e-36	-0.860226	0.025	0.229	6.43553e-32	down
CB1 vs HB1	1 - Erythroid	/	ECI2	3.27923e-36	-0.563574	0.009	0.161	7.10872e-32	down
CB1 vs HB1	1 - Erythroid	/	RIOK3	3.36208e-36	1.10141	0.922	0.62	7.28831e-32	up
CB1 vs HB1	1 - Erythroid	/	NHP2	3.50535e-36	-0.565151	0.011	0.172	7.5989e-32	down
CB1 vs HB1	1 - Erythroid	/	CCT4	3.64141e-36	-1.07845	0.032	0.25	7.89385e-32	down
CB1 vs HB1	1 - Erythroid	/	CCND3	4.29723e-36	-0.729076	0.015	0.188	9.31554e-32	down
CB1 vs HB1	1 - Erythroid	/	SAMM50	4.55094e-36	-0.635179	0.019	0.203	9.86552e-32	down
CB1 vs HB1	1 - Erythroid	/	KMT5A	4.95295e-36	-0.655746	0.005	0.135	1.0737e-31	down
CB1 vs HB1	1 - Erythroid	/	PSMB2	5.05919e-36	-0.588128	0.009	0.161	1.09673e-31	down
CB1 vs HB1	1 - Erythroid	/	RPS17	6.90049e-36	-1.5803	0.089	0.38	1.49589e-31	down
CB1 vs HB1	1 - Erythroid	/	RPL24	7.16333e-36	-2.17865	0.316	0.688	1.55287e-31	down
CB1 vs HB1	1 - Erythroid	/	ZWINT	7.87894e-36	-0.548416	0.004	0.13	1.708e-31	down
CB1 vs HB1	1 - Erythroid	/	PPT2	1.06389e-35	-0.625944	0.008	0.156	2.30629e-31	down
CB1 vs HB1	1 - Erythroid	/	TMA7	1.31036e-35	-1.51809	0.154	0.495	2.84059e-31	down
CB1 vs HB1	1 - Erythroid	/	RPL22	1.65827e-35	-2.23611	0.185	0.526	3.5948e-31	down
CB1 vs HB1	1 - Erythroid	/	TOMM7	2.04615e-35	-1.0136	0.052	0.302	4.43565e-31	down
CB1 vs HB1	1 - Erythroid	/	TPI1	2.33461e-35	-1.01064	0.03	0.24	5.06097e-31	down
CB1 vs HB1	1 - Erythroid	/	HBB	2.37242e-35	0.958179	0.999	0.979	5.14292e-31	up
CB1 vs HB1	1 - Erythroid	/	HMGN1	2.58981e-35	-0.758818	0.013	0.177	5.61419e-31	down
CB1 vs HB1	1 - Erythroid	/	KIF15	3.17256e-35	-0.521264	0.003	0.12	6.87747e-31	down
CB1 vs HB1	1 - Erythroid	/	TAF15	3.72791e-35	-0.556832	0.01	0.161	8.08137e-31	down
CB1 vs HB1	1 - Erythroid	/	GINS2	3.74269e-35	-0.40442	0.001	0.109	8.1134e-31	down
CB1 vs HB1	1 - Erythroid	/	NCOA4	3.83529e-35	0.93957	0.984	0.792	8.31414e-31	up
CB1 vs HB1	1 - Erythroid	/	CYCS	4.42683e-35	-0.90686	0.032	0.245	9.59648e-31	down
CB1 vs HB1	1 - Erythroid	/	SRP9	8.39865e-35	-0.978649	0.045	0.281	1.82066e-30	down
CB1 vs HB1	1 - Erythroid	/	GLIPR2	9.43221e-35	-0.659191	0.017	0.193	2.04472e-30	down
CB1 vs HB1	1 - Erythroid	/	HSPA8	9.63911e-35	-2.39129	0.092	0.38	2.08957e-30	down
CB1 vs HB1	1 - Erythroid	/	CCT2	1.01114e-34	-1.32599	0.094	0.385	2.19194e-30	down
CB1 vs HB1	1 - Erythroid	/	BCAP29	1.01546e-34	-0.452558	0.005	0.135	2.20132e-30	down
CB1 vs HB1	1 - Erythroid	/	VBP1	1.85133e-34	-1.02361	0.082	0.365	4.01332e-30	down
CB1 vs HB1	1 - Erythroid	/	PARVB	1.97891e-34	-0.487046	0.005	0.13	4.28989e-30	down
CB1 vs HB1	1 - Erythroid	/	CENPK	2.01099e-34	-0.535821	0.009	0.156	4.35942e-30	down
CB1 vs HB1	1 - Erythroid	/	ASPM	2.42979e-34	-0.786708	0.007	0.146	5.2673e-30	down
CB1 vs HB1	1 - Erythroid	/	NDUFB1	2.43823e-34	-0.751095	0.027	0.229	5.2856e-30	down
CB1 vs HB1	1 - Erythroid	/	ALAS2	2.47972e-34	0.724472	0.995	0.969	5.37554e-30	up
CB1 vs HB1	1 - Erythroid	/	WDR34	2.5606e-34	-0.42472	0.005	0.13	5.55086e-30	down
CB1 vs HB1	1 - Erythroid	/	RPS27	2.84942e-34	-2.79835	0.233	0.568	6.17697e-30	down
CB1 vs HB1	1 - Erythroid	/	HNRNPH3	3.2034e-34	-0.849021	0.015	0.182	6.94433e-30	down
CB1 vs HB1	1 - Erythroid	/	EEF1E1	4.39397e-34	-0.401632	0.004	0.125	9.52525e-30	down
CB1 vs HB1	1 - Erythroid	/	ACADM	5.29031e-34	-0.550275	0.012	0.167	1.14683e-29	down
CB1 vs HB1	1 - Erythroid	/	RBBP4	5.95376e-34	-0.821335	0.025	0.219	1.29066e-29	down
CB1 vs HB1	1 - Erythroid	/	LIG1	9.59691e-34	-0.441391	0.003	0.12	2.08042e-29	down
CB1 vs HB1	1 - Erythroid	/	NDUFB7	1.17822e-33	-0.691357	0.052	0.302	2.55414e-29	down
CB1 vs HB1	1 - Erythroid	/	S100A4	1.2351e-33	-1.67901	0.056	0.302	2.67745e-29	down
CB1 vs HB1	1 - Erythroid	/	ECT2	1.31475e-33	-0.464061	0.003	0.12	2.85011e-29	down
CB1 vs HB1	1 - Erythroid	/	ERH	1.45434e-33	-0.866729	0.017	0.188	3.15271e-29	down
CB1 vs HB1	1 - Erythroid	/	COX5A	1.50551e-33	-0.678659	0.017	0.188	3.26364e-29	down
CB1 vs HB1	1 - Erythroid	/	TIMM10	1.65479e-33	-0.4039	0.003	0.115	3.58726e-29	down
CB1 vs HB1	1 - Erythroid	/	SPDL1	1.96676e-33	-0.358286	0.001	0.099	4.26353e-29	down
CB1 vs HB1	1 - Erythroid	/	SSBP1	2.23304e-33	-0.834136	0.023	0.208	4.84079e-29	down
CB1 vs HB1	1 - Erythroid	/	BTG3	2.39523e-33	-0.478251	0.001	0.104	5.19238e-29	down
CB1 vs HB1	1 - Erythroid	/	PRG2	2.45299e-33	-0.719647	0.001	0.104	5.31759e-29	down
CB1 vs HB1	1 - Erythroid	/	FANCI	2.46471e-33	-0.309622	0.001	0.104	5.343e-29	down
CB1 vs HB1	1 - Erythroid	/	EBP	2.60973e-33	-0.377764	0.001	0.104	5.65738e-29	down
CB1 vs HB1	1 - Erythroid	/	CKS1B	2.9069e-33	-0.564534	0.011	0.161	6.30159e-29	down
CB1 vs HB1	1 - Erythroid	/	PHPT1	7.91724e-33	-0.712526	0.016	0.182	1.7163e-28	down
CB1 vs HB1	1 - Erythroid	/	EEF1D	8.86078e-33	-1.76129	0.172	0.49	1.92084e-28	down
CB1 vs HB1	1 - Erythroid	/	GMPS	9.20922e-33	-0.525625	0.014	0.172	1.99637e-28	down
CB1 vs HB1	1 - Erythroid	/	NUDT21	1.00279e-32	-0.442302	0.014	0.172	2.17384e-28	down
CB1 vs HB1	1 - Erythroid	/	HNRNPA2B1	1.09737e-32	-2.00654	0.233	0.562	2.37889e-28	down
CB1 vs HB1	1 - Erythroid	/	IER3IP1	1.11637e-32	-0.430856	0.005	0.125	2.42007e-28	down
CB1 vs HB1	1 - Erythroid	/	ARHGAP19	1.21859e-32	-0.488755	0.005	0.125	2.64167e-28	down
CB1 vs HB1	1 - Erythroid	/	MICOS10	1.25827e-32	-0.567789	0.023	0.208	2.72767e-28	down
CB1 vs HB1	1 - Erythroid	/	RPL36	1.29134e-32	-2.62244	0.167	0.479	2.79938e-28	down
CB1 vs HB1	1 - Erythroid	/	GABARAPL2	1.40381e-32	0.859387	0.964	0.703	3.04319e-28	up
CB1 vs HB1	1 - Erythroid	/	NASP	1.76127e-32	-0.680856	0.012	0.161	3.81808e-28	down
CB1 vs HB1	1 - Erythroid	/	C1QBP	1.81397e-32	-0.514793	0.008	0.146	3.93232e-28	down
CB1 vs HB1	1 - Erythroid	/	UBB	1.81657e-32	0.900766	0.993	0.917	3.93795e-28	up
CB1 vs HB1	1 - Erythroid	/	NDUFAB1	2.13021e-32	-0.779438	0.028	0.224	4.61788e-28	down
CB1 vs HB1	1 - Erythroid	/	EIF4H	2.22003e-32	-0.667866	0.021	0.198	4.81258e-28	down
CB1 vs HB1	1 - Erythroid	/	SRPK1	2.27925e-32	-0.537064	0.008	0.146	4.94095e-28	down
CB1 vs HB1	1 - Erythroid	/	MTDH	2.33066e-32	-0.767748	0.013	0.167	5.0524e-28	down
CB1 vs HB1	1 - Erythroid	/	CDCA2	2.95001e-32	-0.59751	0.006	0.135	6.39503e-28	down
CB1 vs HB1	1 - Erythroid	/	NDUFV1	3.28125e-32	-0.560457	0.01	0.151	7.1131e-28	down
CB1 vs HB1	1 - Erythroid	/	GTSE1	3.50599e-32	-0.570693	0.004	0.12	7.60029e-28	down
CB1 vs HB1	1 - Erythroid	/	PTMA	3.86881e-32	-2.84898	0.161	0.469	8.38681e-28	down
CB1 vs HB1	1 - Erythroid	/	BPGM	5.15979e-32	0.954631	0.972	0.615	1.11854e-27	up
CB1 vs HB1	1 - Erythroid	/	AURKA	5.51202e-32	-0.994726	0.018	0.188	1.1949e-27	down
CB1 vs HB1	1 - Erythroid	/	S100A8	6.18993e-32	-1.66747	0.081	0.354	1.34185e-27	down
CB1 vs HB1	1 - Erythroid	/	BRCA1	6.20201e-32	-0.276165	0	0.089	1.34447e-27	down
CB1 vs HB1	1 - Erythroid	/	CKAP2L	7.24666e-32	-0.445429	0.003	0.115	1.57093e-27	down
CB1 vs HB1	1 - Erythroid	/	SUMO2	7.41147e-32	-1.22011	0.059	0.302	1.60666e-27	down
CB1 vs HB1	1 - Erythroid	/	TOP2A	7.5634e-32	-0.868428	0.006	0.13	1.63959e-27	down
CB1 vs HB1	1 - Erythroid	/	BCL2L1	7.92455e-32	0.921563	0.963	0.615	1.71788e-27	up
CB1 vs HB1	1 - Erythroid	/	RNASEH2C	8.57785e-32	-0.915047	0.054	0.292	1.85951e-27	down
CB1 vs HB1	1 - Erythroid	/	CENPE	9.29441e-32	-0.826653	0.011	0.156	2.01484e-27	down
CB1 vs HB1	1 - Erythroid	/	C20orf27	9.89352e-32	-0.718971	0.02	0.193	2.14472e-27	down
CB1 vs HB1	1 - Erythroid	/	RPS28	1.14385e-31	-2.80905	0.362	0.698	2.47964e-27	down
CB1 vs HB1	1 - Erythroid	/	DSN1	1.52129e-31	-0.497931	0.001	0.099	3.29785e-27	down
CB1 vs HB1	1 - Erythroid	/	TACC3	1.57244e-31	-0.634391	0.005	0.125	3.40874e-27	down
CB1 vs HB1	1 - Erythroid	/	LMO2	1.83406e-31	-0.375236	0.005	0.125	3.97587e-27	down
CB1 vs HB1	1 - Erythroid	/	PRPF19	2.1887e-31	-0.435544	0.005	0.125	4.74466e-27	down
CB1 vs HB1	1 - Erythroid	/	PSMB1	2.68794e-31	-0.954382	0.047	0.271	5.82692e-27	down
CB1 vs HB1	1 - Erythroid	/	MKI67	2.86031e-31	-0.917573	0.012	0.161	6.20059e-27	down
CB1 vs HB1	1 - Erythroid	/	SLIRP	2.88162e-31	-0.50274	0.017	0.182	6.24678e-27	down
CB1 vs HB1	1 - Erythroid	/	HNRNPA1	3.33518e-31	-1.87674	0.148	0.448	7.23e-27	down
CB1 vs HB1	1 - Erythroid	/	HTRA2	3.3537e-31	-1.01728	0.035	0.24	7.27016e-27	down
CB1 vs HB1	1 - Erythroid	/	EIF3M	3.40096e-31	-0.818058	0.023	0.203	7.37259e-27	down
CB1 vs HB1	1 - Erythroid	/	CKS2	3.48953e-31	-1.32186	0.05	0.276	7.5646e-27	down
CB1 vs HB1	1 - Erythroid	/	BLVRA	3.53885e-31	-0.508626	0.007	0.135	7.67152e-27	down
CB1 vs HB1	1 - Erythroid	/	RBIS	3.96864e-31	-0.670816	0.023	0.203	8.60322e-27	down
CB1 vs HB1	1 - Erythroid	/	PPIG	4.10163e-31	-0.541682	0.01	0.151	8.89151e-27	down
CB1 vs HB1	1 - Erythroid	/	ATP5PD	4.1253e-31	-0.863395	0.051	0.281	8.94283e-27	down
CB1 vs HB1	1 - Erythroid	/	DDX39B	6.25446e-31	-0.823939	0.017	0.177	1.35584e-26	down
CB1 vs HB1	1 - Erythroid	/	MPDU1	9.72506e-31	-0.478836	0.012	0.156	2.1082e-26	down
CB1 vs HB1	1 - Erythroid	/	TUBB4B	1.00948e-30	-1.97821	0.199	0.526	2.18834e-26	down
CB1 vs HB1	1 - Erythroid	/	HSPE1	1.1787e-30	-0.707989	0.01	0.146	2.55519e-26	down
CB1 vs HB1	1 - Erythroid	/	RBBP7	1.2008e-30	-0.384407	0.006	0.13	2.60308e-26	down
CB1 vs HB1	1 - Erythroid	/	EXOSC8	1.25176e-30	-0.372999	0.004	0.115	2.71357e-26	down
CB1 vs HB1	1 - Erythroid	/	DNAJC8	1.38895e-30	-0.701091	0.032	0.229	3.01096e-26	down
CB1 vs HB1	1 - Erythroid	/	RBM3	1.42871e-30	-1.16242	0.063	0.302	3.09715e-26	down
CB1 vs HB1	1 - Erythroid	/	FARSB	1.55741e-30	-0.342814	0.004	0.115	3.37616e-26	down
CB1 vs HB1	1 - Erythroid	/	HARS	1.65768e-30	-0.523696	0.01	0.146	3.59352e-26	down
CB1 vs HB1	1 - Erythroid	/	CALM3	1.7257e-30	-1.54715	0.127	0.422	3.74098e-26	down
CB1 vs HB1	1 - Erythroid	/	DCTN3	1.96309e-30	-1.08436	0.096	0.375	4.25559e-26	down
CB1 vs HB1	1 - Erythroid	/	YBX1	2.01902e-30	-1.52175	0.267	0.604	4.37684e-26	down
CB1 vs HB1	1 - Erythroid	/	HNRNPA3	2.48442e-30	-1.10745	0.069	0.318	5.38572e-26	down
CB1 vs HB1	1 - Erythroid	/	NUDT1	2.89427e-30	-0.981583	0.039	0.245	6.2742e-26	down
CB1 vs HB1	1 - Erythroid	/	ESD	2.99561e-30	-0.644888	0.011	0.151	6.49388e-26	down
CB1 vs HB1	1 - Erythroid	/	DEPDC1	3.12435e-30	-0.551785	0.01	0.146	6.77297e-26	down
CB1 vs HB1	1 - Erythroid	/	TCP11L2	3.48121e-30	1.0883	0.828	0.432	7.54656e-26	up
CB1 vs HB1	1 - Erythroid	/	NDUFAF8	3.88039e-30	-0.205555	0	0.083	8.41192e-26	down
CB1 vs HB1	1 - Erythroid	/	MRPL34	3.93083e-30	-0.493189	0.008	0.135	8.52125e-26	down
CB1 vs HB1	1 - Erythroid	/	MRPL28	4.10479e-30	-0.545457	0.026	0.208	8.89837e-26	down
CB1 vs HB1	1 - Erythroid	/	IMMT	4.37255e-30	-0.678729	0.02	0.188	9.47882e-26	down
CB1 vs HB1	1 - Erythroid	/	MCM6	4.46355e-30	-0.403888	0.003	0.104	9.67608e-26	down
CB1 vs HB1	1 - Erythroid	/	HAT1	4.56256e-30	-0.394443	0.006	0.125	9.89072e-26	down
CB1 vs HB1	1 - Erythroid	/	COX8A	4.99173e-30	-1.24706	0.069	0.312	1.08211e-25	down
CB1 vs HB1	1 - Erythroid	/	COX4I1	5.42431e-30	-1.46214	0.127	0.422	1.17588e-25	down
CB1 vs HB1	1 - Erythroid	/	PAK1	5.73555e-30	-0.316608	0.003	0.104	1.24335e-25	down
CB1 vs HB1	1 - Erythroid	/	CENPH	6.09298e-30	-0.293099	0.003	0.104	1.32084e-25	down
CB1 vs HB1	1 - Erythroid	/	SRRM1	6.19217e-30	-0.818656	0.025	0.203	1.34234e-25	down
CB1 vs HB1	1 - Erythroid	/	WSB1	6.32265e-30	-0.806632	0.014	0.161	1.37062e-25	down
CB1 vs HB1	1 - Erythroid	/	TSTA3	7.00184e-30	-1.10374	0.12	0.411	1.51786e-25	down
CB1 vs HB1	1 - Erythroid	/	NCAPH	7.55337e-30	-0.457581	0.002	0.099	1.63742e-25	down
CB1 vs HB1	1 - Erythroid	/	RFC4	7.80127e-30	-0.24809	0.001	0.089	1.69116e-25	down
CB1 vs HB1	1 - Erythroid	/	NCAPG2	8.64427e-30	-0.387323	0.002	0.099	1.8739e-25	down
CB1 vs HB1	1 - Erythroid	/	RNASEH2A	8.80107e-30	-0.420703	0.002	0.099	1.90789e-25	down
CB1 vs HB1	1 - Erythroid	/	UQCRH	8.86742e-30	-1.49305	0.164	0.469	1.92228e-25	down
CB1 vs HB1	1 - Erythroid	/	POLD2	9.61519e-30	-0.555778	0.007	0.13	2.08438e-25	down
CB1 vs HB1	1 - Erythroid	/	ROMO1	1.22825e-29	-0.799273	0.039	0.245	2.66261e-25	down
CB1 vs HB1	1 - Erythroid	/	GDI2	1.27746e-29	-0.750241	0.034	0.229	2.76929e-25	down
CB1 vs HB1	1 - Erythroid	/	TIMM8B	1.319e-29	-0.813988	0.03	0.219	2.85933e-25	down
CB1 vs HB1	1 - Erythroid	/	PARPBP	1.32106e-29	-0.429893	0.005	0.12	2.86378e-25	down
CB1 vs HB1	1 - Erythroid	/	GAPDH	1.37257e-29	-2.71056	0.194	0.5	2.97545e-25	down
CB1 vs HB1	1 - Erythroid	/	SNHG8	1.80436e-29	-0.432807	0.01	0.146	3.9115e-25	down
CB1 vs HB1	1 - Erythroid	/	PSMD12	1.94126e-29	-0.486451	0.01	0.146	4.20826e-25	down
CB1 vs HB1	1 - Erythroid	/	PSMD8	2.32976e-29	-0.929911	0.084	0.349	5.05046e-25	down
CB1 vs HB1	1 - Erythroid	/	RPL38	2.62979e-29	-1.51563	0.138	0.427	5.70086e-25	down
CB1 vs HB1	1 - Erythroid	/	CHCHD2	3.00328e-29	-1.43184	0.408	0.719	6.51051e-25	down
CB1 vs HB1	1 - Erythroid	/	NUDC	3.1427e-29	-0.5717	0.016	0.167	6.81275e-25	down
CB1 vs HB1	1 - Erythroid	/	MRPS9	3.48355e-29	-0.565522	0.024	0.198	7.55163e-25	down
CB1 vs HB1	1 - Erythroid	/	SNRPE	3.67389e-29	-0.540377	0.01	0.141	7.96426e-25	down
CB1 vs HB1	1 - Erythroid	/	RPS27A	3.82909e-29	-2.65432	0.413	0.698	8.3007e-25	down
CB1 vs HB1	1 - Erythroid	/	HJURP	4.05405e-29	-0.725848	0.013	0.156	8.78838e-25	down
CB1 vs HB1	1 - Erythroid	/	PSMD14	4.07821e-29	-0.437505	0.013	0.156	8.84074e-25	down
CB1 vs HB1	1 - Erythroid	/	SSR3	4.12694e-29	-0.495228	0.013	0.156	8.94638e-25	down
CB1 vs HB1	1 - Erythroid	/	PMPCB	4.5021e-29	-0.465403	0.017	0.172	9.75966e-25	down
CB1 vs HB1	1 - Erythroid	/	COMMD4	4.62918e-29	-0.452454	0.006	0.125	1.00351e-24	down
CB1 vs HB1	1 - Erythroid	/	NDUFA8	5.13433e-29	-0.420442	0.017	0.172	1.11302e-24	down
CB1 vs HB1	1 - Erythroid	/	HSDL2	6.17904e-29	-0.409159	0.004	0.109	1.33949e-24	down
CB1 vs HB1	1 - Erythroid	/	IPO5	7.48646e-29	-0.338235	0.004	0.109	1.62292e-24	down
CB1 vs HB1	1 - Erythroid	/	TBCA	7.51148e-29	-0.694119	0.025	0.198	1.62834e-24	down
CB1 vs HB1	1 - Erythroid	/	ATP5MD	7.59766e-29	-0.844067	0.054	0.276	1.64702e-24	down
CB1 vs HB1	1 - Erythroid	/	PSMC3	8.63094e-29	-0.777596	0.048	0.266	1.87102e-24	down
CB1 vs HB1	1 - Erythroid	/	ARL2	1.08189e-28	-0.537043	0.006	0.12	2.34532e-24	down
CB1 vs HB1	1 - Erythroid	/	CLTA	1.13141e-28	-0.567603	0.017	0.172	2.45268e-24	down
CB1 vs HB1	1 - Erythroid	/	CDK4	1.19001e-28	-0.529653	0.006	0.12	2.5797e-24	down
CB1 vs HB1	1 - Erythroid	/	KPNB1	1.20133e-28	-0.711894	0.026	0.203	2.60424e-24	down
CB1 vs HB1	1 - Erythroid	/	BUB3	1.20375e-28	-0.664898	0.016	0.167	2.60948e-24	down
CB1 vs HB1	1 - Erythroid	/	STIP1	1.25574e-28	-0.541566	0.008	0.13	2.7222e-24	down
CB1 vs HB1	1 - Erythroid	/	RBM17	1.27298e-28	-0.451091	0.008	0.13	2.75957e-24	down
CB1 vs HB1	1 - Erythroid	/	FBXL5	1.40847e-28	-0.658691	0.012	0.151	3.05327e-24	down
CB1 vs HB1	1 - Erythroid	/	SNRPD3	1.42936e-28	-0.754639	0.025	0.198	3.09857e-24	down
CB1 vs HB1	1 - Erythroid	/	CCT8	1.48823e-28	-0.805794	0.051	0.271	3.22619e-24	down
CB1 vs HB1	1 - Erythroid	/	NSA2	1.49802e-28	-0.634163	0.023	0.193	3.2474e-24	down
CB1 vs HB1	1 - Erythroid	/	LSM2	1.50453e-28	-0.481039	0.012	0.151	3.26153e-24	down
CB1 vs HB1	1 - Erythroid	/	PPA1	1.61825e-28	-0.533837	0.014	0.156	3.50805e-24	down
CB1 vs HB1	1 - Erythroid	/	NUDCD2	1.63981e-28	-0.597036	0.016	0.167	3.55479e-24	down
CB1 vs HB1	1 - Erythroid	/	HNRNPH1	1.97988e-28	-0.73544	0.023	0.193	4.29199e-24	down
CB1 vs HB1	1 - Erythroid	/	DIAPH3	2.08996e-28	-0.272826	0.003	0.104	4.5306e-24	down
CB1 vs HB1	1 - Erythroid	/	KIF18A	3.35597e-28	-0.350575	0.003	0.099	7.27506e-24	down
CB1 vs HB1	1 - Erythroid	/	MRPL16	3.9101e-28	-0.436121	0.005	0.115	8.47631e-24	down
CB1 vs HB1	1 - Erythroid	/	CIP2A	4.07782e-28	-0.34687	0.002	0.094	8.8399e-24	down
CB1 vs HB1	1 - Erythroid	/	RPP30	4.18263e-28	-0.395491	0.005	0.115	9.06711e-24	down
CB1 vs HB1	1 - Erythroid	/	EIF4EBP1	4.37568e-28	-0.396381	0.001	0.083	9.4856e-24	down
CB1 vs HB1	1 - Erythroid	/	PPA2	4.49826e-28	-0.304895	0.002	0.094	9.75132e-24	down
CB1 vs HB1	1 - Erythroid	/	CNIH1	4.62756e-28	-0.465659	0.007	0.125	1.00316e-23	down
CB1 vs HB1	1 - Erythroid	/	RAB6B	4.6674e-28	-0.54519	0.01	0.141	1.0118e-23	down
CB1 vs HB1	1 - Erythroid	/	CHD1L	4.74543e-28	-0.271143	0.002	0.094	1.02871e-23	down
CB1 vs HB1	1 - Erythroid	/	PBK	5.32812e-28	-0.364903	0.002	0.094	1.15503e-23	down
CB1 vs HB1	1 - Erythroid	/	ADIPOR1	5.43457e-28	0.814188	0.942	0.646	1.17811e-23	up
CB1 vs HB1	1 - Erythroid	/	AURKB	5.55529e-28	-0.258834	0.001	0.089	1.20428e-23	down
CB1 vs HB1	1 - Erythroid	/	CENPN	6.10982e-28	-0.532441	0.01	0.141	1.32449e-23	down
CB1 vs HB1	1 - Erythroid	/	SMC1A	6.63565e-28	-0.594418	0.013	0.151	1.43848e-23	down
CB1 vs HB1	1 - Erythroid	/	UQCRB	6.6773e-28	-1.11216	0.234	0.562	1.44751e-23	down
CB1 vs HB1	1 - Erythroid	/	KIF4A	7.21452e-28	-0.404609	0.005	0.115	1.56396e-23	down
CB1 vs HB1	1 - Erythroid	/	RPL37	9.43996e-28	-2.59795	0.269	0.562	2.04639e-23	down
CB1 vs HB1	1 - Erythroid	/	COPS6	1.04747e-27	-0.36136	0.012	0.146	2.27071e-23	down
CB1 vs HB1	1 - Erythroid	/	MTHFD1	1.06685e-27	-0.449555	0.008	0.13	2.31271e-23	down
CB1 vs HB1	1 - Erythroid	/	EPRS	1.12084e-27	-0.859558	0.036	0.224	2.42975e-23	down
CB1 vs HB1	1 - Erythroid	/	ENY2	1.12458e-27	-0.97267	0.067	0.302	2.43787e-23	down
CB1 vs HB1	1 - Erythroid	/	TXN2	1.19436e-27	-0.633426	0.03	0.208	2.58913e-23	down
CB1 vs HB1	1 - Erythroid	/	NDUFA6	1.24154e-27	-1.01034	0.068	0.302	2.69141e-23	down
CB1 vs HB1	1 - Erythroid	/	GGCT	1.24733e-27	-0.393924	0.005	0.109	2.70395e-23	down
CB1 vs HB1	1 - Erythroid	/	CHCHD3	1.35864e-27	-0.609163	0.025	0.193	2.94525e-23	down
CB1 vs HB1	1 - Erythroid	/	FKBP4	1.3676e-27	-0.488646	0.005	0.109	2.96468e-23	down
CB1 vs HB1	1 - Erythroid	/	EBNA1BP2	1.53422e-27	-0.296286	0.005	0.109	3.32588e-23	down
CB1 vs HB1	1 - Erythroid	/	TIMM50	1.65363e-27	-0.483535	0.006	0.12	3.58474e-23	down
CB1 vs HB1	1 - Erythroid	/	VPS29	1.78807e-27	-0.863909	0.043	0.245	3.87617e-23	down
CB1 vs HB1	1 - Erythroid	/	C19orf48	1.91108e-27	-0.49143	0.006	0.12	4.14284e-23	down
CB1 vs HB1	1 - Erythroid	/	SF3A3	1.94342e-27	-0.421375	0.01	0.135	4.21295e-23	down
CB1 vs HB1	1 - Erythroid	/	MTCH2	2.17791e-27	-0.463974	0.011	0.141	4.72128e-23	down
CB1 vs HB1	1 - Erythroid	/	RNPS1	2.64426e-27	-0.625662	0.03	0.208	5.73223e-23	down
CB1 vs HB1	1 - Erythroid	/	PGK1	3.12843e-27	-0.868472	0.04	0.234	6.7818e-23	down
CB1 vs HB1	1 - Erythroid	/	SNRPB2	3.33434e-27	-0.705975	0.017	0.167	7.22818e-23	down
CB1 vs HB1	1 - Erythroid	/	SUCLG1	3.63826e-27	-0.488351	0.011	0.141	7.88702e-23	down
CB1 vs HB1	1 - Erythroid	/	HSPB11	3.66656e-27	-0.36395	0.004	0.104	7.94837e-23	down
CB1 vs HB1	1 - Erythroid	/	SFXN1	3.72486e-27	-0.283437	0.004	0.104	8.07475e-23	down
CB1 vs HB1	1 - Erythroid	/	NUP37	3.93624e-27	-0.349445	0.004	0.104	8.53298e-23	down
CB1 vs HB1	1 - Erythroid	/	NDUFB4	4.14006e-27	-1.03074	0.089	0.339	8.97482e-23	down
CB1 vs HB1	1 - Erythroid	/	KNSTRN	4.15951e-27	-0.548206	0.004	0.104	9.01699e-23	down
CB1 vs HB1	1 - Erythroid	/	UQCRC1	4.25446e-27	-0.707453	0.036	0.224	9.22281e-23	down
CB1 vs HB1	1 - Erythroid	/	RAB8A	4.40742e-27	-0.488333	0.008	0.125	9.55442e-23	down
CB1 vs HB1	1 - Erythroid	/	RPL4	5.19253e-27	-2.18473	0.215	0.5	1.12564e-22	down
CB1 vs HB1	1 - Erythroid	/	RPS3	5.45277e-27	-2.93022	0.513	0.771	1.18205e-22	down
CB1 vs HB1	1 - Erythroid	/	NUTF2	6.10681e-27	-0.92336	0.101	0.365	1.32383e-22	down
CB1 vs HB1	1 - Erythroid	/	HNRNPU	6.38183e-27	-0.721908	0.03	0.208	1.38345e-22	down
CB1 vs HB1	1 - Erythroid	/	RPSA	6.5146e-27	-2.6655	0.288	0.578	1.41224e-22	down
CB1 vs HB1	1 - Erythroid	/	CLPP	6.76292e-27	-0.319103	0.006	0.115	1.46607e-22	down
CB1 vs HB1	1 - Erythroid	/	ARL6IP6	6.96457e-27	-0.438762	0.003	0.099	1.50978e-22	down
CB1 vs HB1	1 - Erythroid	/	KIF2C	8.00044e-27	-0.375607	0.003	0.099	1.73434e-22	down
CB1 vs HB1	1 - Erythroid	/	VPS25	8.67969e-27	-0.241392	0.003	0.099	1.88158e-22	down
CB1 vs HB1	1 - Erythroid	/	TK1	9.19478e-27	-1.01535	0.055	0.266	1.99324e-22	down
CB1 vs HB1	1 - Erythroid	/	RPL9	9.72831e-27	-2.12529	0.187	0.479	2.1089e-22	down
CB1 vs HB1	1 - Erythroid	/	NDUFA7	1.09028e-26	-0.888994	0.078	0.323	2.36352e-22	down
CB1 vs HB1	1 - Erythroid	/	DNMT1	1.29091e-26	-0.394984	0.01	0.135	2.79844e-22	down
CB1 vs HB1	1 - Erythroid	/	FXN	1.29357e-26	-0.47222	0.007	0.12	2.8042e-22	down
CB1 vs HB1	1 - Erythroid	/	ATP1B2	1.29415e-26	-0.805253	0.037	0.224	2.80546e-22	down
CB1 vs HB1	1 - Erythroid	/	FADS2	1.50663e-26	-0.295058	0	0.073	3.26607e-22	down
CB1 vs HB1	1 - Erythroid	/	A4GALT	1.50663e-26	-0.293649	0	0.073	3.26607e-22	down
CB1 vs HB1	1 - Erythroid	/	STMN1	1.52173e-26	-1.26179	0.013	0.146	3.2988e-22	down
CB1 vs HB1	1 - Erythroid	/	CCDC167	1.67646e-26	-0.674164	0.032	0.214	3.63423e-22	down
CB1 vs HB1	1 - Erythroid	/	PHB	1.98057e-26	-0.542862	0.016	0.156	4.29348e-22	down
CB1 vs HB1	1 - Erythroid	/	SKA1	2.8117e-26	-0.349412	0.002	0.089	6.09521e-22	down
CB1 vs HB1	1 - Erythroid	/	SLC25A39	2.82151e-26	0.618204	0.992	0.911	6.11647e-22	up
CB1 vs HB1	1 - Erythroid	/	RPL23A	2.93033e-26	-2.22631	0.292	0.583	6.35237e-22	down
CB1 vs HB1	1 - Erythroid	/	RAD51AP1	2.94836e-26	-0.334315	0.001	0.078	6.39145e-22	down
CB1 vs HB1	1 - Erythroid	/	SNRNP25	3.29107e-26	-0.505575	0.014	0.151	7.13438e-22	down
CB1 vs HB1	1 - Erythroid	/	GNG5	3.33732e-26	-1.32605	0.118	0.38	7.23465e-22	down
CB1 vs HB1	1 - Erythroid	/	RPL3	3.75891e-26	-2.75495	0.283	0.568	8.14857e-22	down
CB1 vs HB1	1 - Erythroid	/	EEF1B2	3.81979e-26	-2.29016	0.161	0.432	8.28055e-22	down
CB1 vs HB1	1 - Erythroid	/	MRPS24	3.85867e-26	-0.740711	0.019	0.167	8.36483e-22	down
CB1 vs HB1	1 - Erythroid	/	UBE2L6	4.0637e-26	-0.684154	0.043	0.24	8.80929e-22	down
CB1 vs HB1	1 - Erythroid	/	ILKAP	4.3931e-26	-0.431918	0.008	0.125	9.52337e-22	down
CB1 vs HB1	1 - Erythroid	/	LARS	4.42172e-26	-0.446809	0.008	0.125	9.58541e-22	down
CB1 vs HB1	1 - Erythroid	/	SYNC	5.54883e-26	-0.394225	0.008	0.125	1.20288e-21	down
CB1 vs HB1	1 - Erythroid	/	HLA-A	5.88042e-26	1.07559	0.572	0.135	1.27476e-21	up
CB1 vs HB1	1 - Erythroid	/	RPS16	6.14352e-26	-2.52271	0.183	0.458	1.33179e-21	down
CB1 vs HB1	1 - Erythroid	/	ODF2	6.28104e-26	-0.420871	0.005	0.104	1.3616e-21	down
CB1 vs HB1	1 - Erythroid	/	ELOVL5	6.52285e-26	-0.321503	0.005	0.104	1.41402e-21	down
CB1 vs HB1	1 - Erythroid	/	YEATS4	6.62215e-26	-0.264507	0.005	0.104	1.43555e-21	down
CB1 vs HB1	1 - Erythroid	/	FUS	7.67964e-26	-0.629934	0.023	0.182	1.66479e-21	down
CB1 vs HB1	1 - Erythroid	/	NDUFS3	8.47907e-26	-0.426707	0.011	0.135	1.83809e-21	down
CB1 vs HB1	1 - Erythroid	/	RPL27A	8.6697e-26	-1.48808	0.098	0.344	1.87942e-21	down
CB1 vs HB1	1 - Erythroid	/	RPL15	9.10056e-26	-2.31966	0.313	0.604	1.97282e-21	down
CB1 vs HB1	1 - Erythroid	/	NDUFS6	9.88116e-26	-0.541839	0.025	0.188	2.14204e-21	down
CB1 vs HB1	1 - Erythroid	/	RHEB	1.15928e-25	-0.513283	0.016	0.156	2.51309e-21	down
CB1 vs HB1	1 - Erythroid	/	MRPL20	1.20901e-25	-0.753012	0.036	0.219	2.6209e-21	down
CB1 vs HB1	1 - Erythroid	/	NDUFB9	1.33633e-25	-0.943828	0.068	0.292	2.8969e-21	down
CB1 vs HB1	1 - Erythroid	/	TECR	1.64859e-25	-0.497633	0.012	0.141	3.57381e-21	down
CB1 vs HB1	1 - Erythroid	/	HAUS1	1.76718e-25	-0.276532	0.004	0.099	3.8309e-21	down
CB1 vs HB1	1 - Erythroid	/	RPS27L	1.80346e-25	-0.891949	0.03	0.203	3.90954e-21	down
CB1 vs HB1	1 - Erythroid	/	KNL1	2.04122e-25	-0.38558	0.008	0.12	4.42496e-21	down
CB1 vs HB1	1 - Erythroid	/	SPCS1	2.20792e-25	-0.63643	0.036	0.219	4.78634e-21	down
CB1 vs HB1	1 - Erythroid	/	TERF2IP	2.39115e-25	0.938282	0.803	0.443	5.18354e-21	up
CB1 vs HB1	1 - Erythroid	/	PAICS	2.53636e-25	-0.434105	0.006	0.109	5.49831e-21	down
CB1 vs HB1	1 - Erythroid	/	NME2	2.61101e-25	-1.0523	0.044	0.234	5.66015e-21	down
CB1 vs HB1	1 - Erythroid	/	NDUFB6	2.6904e-25	-0.984812	0.059	0.271	5.83224e-21	down
CB1 vs HB1	1 - Erythroid	/	NCAPD2	2.80077e-25	-0.358568	0.006	0.109	6.07152e-21	down
CB1 vs HB1	1 - Erythroid	/	ANP32A	3.12729e-25	-0.672975	0.016	0.151	6.77933e-21	down
CB1 vs HB1	1 - Erythroid	/	KIF22	3.16134e-25	-0.835151	0.026	0.188	6.85315e-21	down
CB1 vs HB1	1 - Erythroid	/	ERP29	3.17341e-25	-0.559374	0.024	0.182	6.87931e-21	down
CB1 vs HB1	1 - Erythroid	/	FTL	3.34037e-25	-0.723725	0.99	0.99	7.24126e-21	down
CB1 vs HB1	1 - Erythroid	/	TOMM20	4.11105e-25	-0.661757	0.036	0.214	8.91194e-21	down
CB1 vs HB1	1 - Erythroid	/	LRR1	4.26739e-25	-0.279971	0.003	0.094	9.25084e-21	down
CB1 vs HB1	1 - Erythroid	/	PSME2	4.41784e-25	-0.734157	0.03	0.198	9.57699e-21	down
CB1 vs HB1	1 - Erythroid	/	PSMA4	4.42597e-25	-0.694801	0.02	0.167	9.59461e-21	down
CB1 vs HB1	1 - Erythroid	/	MT-ATP8	4.74385e-25	-1.44244	0.286	0.62	1.02837e-20	down
CB1 vs HB1	1 - Erythroid	/	BCCIP	5.22194e-25	-0.587601	0.019	0.161	1.13201e-20	down
CB1 vs HB1	1 - Erythroid	/	MPC1	5.93242e-25	-0.381897	0.01	0.13	1.28603e-20	down
CB1 vs HB1	1 - Erythroid	/	QARS	6.63271e-25	-0.304703	0.01	0.13	1.43784e-20	down
CB1 vs HB1	1 - Erythroid	/	PFN1	7.13016e-25	-1.62323	0.185	0.458	1.54568e-20	down
CB1 vs HB1	1 - Erythroid	/	DBF4	7.14719e-25	-0.477535	0.007	0.115	1.54937e-20	down
CB1 vs HB1	1 - Erythroid	/	NME1	7.58008e-25	-0.440963	0.005	0.104	1.64321e-20	down
CB1 vs HB1	1 - Erythroid	/	PKLR	7.91448e-25	-0.326959	0.003	0.089	1.7157e-20	down
CB1 vs HB1	1 - Erythroid	/	MAPRE1	7.92587e-25	-0.441183	0.013	0.141	1.71817e-20	down
CB1 vs HB1	1 - Erythroid	/	LSM7	8.08643e-25	-0.430829	0.012	0.135	1.75298e-20	down
CB1 vs HB1	1 - Erythroid	/	KRTCAP2	8.51298e-25	-0.698826	0.028	0.193	1.84544e-20	down
CB1 vs HB1	1 - Erythroid	/	IPO7	8.89147e-25	-0.368957	0.005	0.104	1.92749e-20	down
CB1 vs HB1	1 - Erythroid	/	HPRT1	8.97331e-25	-0.404398	0.007	0.115	1.94523e-20	down
CB1 vs HB1	1 - Erythroid	/	DSCC1	9.35508e-25	-0.16042	0	0.068	2.02799e-20	down
CB1 vs HB1	1 - Erythroid	/	NUP107	9.43224e-25	-0.223323	0.003	0.089	2.04472e-20	down
CB1 vs HB1	1 - Erythroid	/	MRPL13	1.0394e-24	-0.329881	0.007	0.115	2.25321e-20	down
CB1 vs HB1	1 - Erythroid	/	COX6C	1.07687e-24	-1.00729	0.089	0.328	2.33444e-20	down
CB1 vs HB1	1 - Erythroid	/	CDC37	1.3337e-24	-0.692593	0.061	0.276	2.8912e-20	down
CB1 vs HB1	1 - Erythroid	/	MTLN	1.35423e-24	-0.2872	0.002	0.083	2.93569e-20	down
CB1 vs HB1	1 - Erythroid	/	RPL22L1	1.40568e-24	-0.881768	0.016	0.151	3.04724e-20	down
CB1 vs HB1	1 - Erythroid	/	ORC1	1.46503e-24	-0.252047	0.002	0.083	3.17589e-20	down
CB1 vs HB1	1 - Erythroid	/	TIMELESS	1.62685e-24	-0.227293	0.002	0.083	3.52669e-20	down
CB1 vs HB1	1 - Erythroid	/	MCM10	1.65585e-24	-0.162012	0.001	0.073	3.58956e-20	down
CB1 vs HB1	1 - Erythroid	/	NAP1L1	1.7266e-24	-0.646742	0.024	0.177	3.74293e-20	down
CB1 vs HB1	1 - Erythroid	/	CCDC137	1.7562e-24	-0.33164	0.001	0.073	3.80709e-20	down
CB1 vs HB1	1 - Erythroid	/	TIMM21	1.77007e-24	-0.334008	0.001	0.078	3.83716e-20	down
CB1 vs HB1	1 - Erythroid	/	TRIP13	1.79097e-24	-0.24105	0.001	0.073	3.88246e-20	down
CB1 vs HB1	1 - Erythroid	/	RFC5	1.80861e-24	-0.207918	0.001	0.073	3.9207e-20	down
CB1 vs HB1	1 - Erythroid	/	CDK2	1.84441e-24	-0.230226	0.001	0.073	3.9983e-20	down
CB1 vs HB1	1 - Erythroid	/	PDHA1	1.86232e-24	-0.431486	0.022	0.172	4.03714e-20	down
CB1 vs HB1	1 - Erythroid	/	TBC1D31	2.0136e-24	-0.190562	0.001	0.078	4.36509e-20	down
CB1 vs HB1	1 - Erythroid	/	MPC2	2.14831e-24	-1.28155	0.217	0.5	4.65711e-20	down
CB1 vs HB1	1 - Erythroid	/	H1F0	2.48517e-24	-2.07853	0.168	0.443	5.38735e-20	down
CB1 vs HB1	1 - Erythroid	/	KIF20B	2.86749e-24	-0.432982	0.005	0.099	6.21614e-20	down
CB1 vs HB1	1 - Erythroid	/	YIF1B	2.96199e-24	-0.309275	0.01	0.125	6.421e-20	down
CB1 vs HB1	1 - Erythroid	/	GPAA1	2.96916e-24	-0.46853	0.011	0.13	6.43655e-20	down
CB1 vs HB1	1 - Erythroid	/	AUP1	3.16102e-24	-0.574434	0.027	0.188	6.85246e-20	down
CB1 vs HB1	1 - Erythroid	/	S100A12	3.30064e-24	-1.00748	0.012	0.135	7.15513e-20	down
CB1 vs HB1	1 - Erythroid	/	RPL17	3.33147e-24	-2.24143	0.225	0.495	7.22195e-20	down
CB1 vs HB1	1 - Erythroid	/	SMC3	3.60939e-24	-0.310101	0.006	0.109	7.82444e-20	down
CB1 vs HB1	1 - Erythroid	/	CBX3	3.95743e-24	-0.896625	0.083	0.312	8.57892e-20	down
CB1 vs HB1	1 - Erythroid	/	TPRKB	4.10722e-24	-0.292535	0.006	0.109	8.90364e-20	down
CB1 vs HB1	1 - Erythroid	/	POLR2I	4.18338e-24	-0.504373	0.026	0.182	9.06874e-20	down
CB1 vs HB1	1 - Erythroid	/	RPS25	4.45895e-24	-2.09384	0.417	0.703	9.66611e-20	down
CB1 vs HB1	1 - Erythroid	/	S100A9	4.47044e-24	-1.48868	0.117	0.38	9.69102e-20	down
CB1 vs HB1	1 - Erythroid	/	EIF4B	4.52118e-24	-0.887504	0.07	0.292	9.80102e-20	down
CB1 vs HB1	1 - Erythroid	/	ALAD	5.68676e-24	-1.38164	0.213	0.495	1.23278e-19	down
CB1 vs HB1	1 - Erythroid	/	MTHFD2	7.33822e-24	-0.389666	0.004	0.094	1.59078e-19	down
CB1 vs HB1	1 - Erythroid	/	RPL18A	7.55846e-24	-2.59729	0.463	0.708	1.63852e-19	down
CB1 vs HB1	1 - Erythroid	/	ATP5PO	7.66343e-24	-0.927515	0.095	0.333	1.66128e-19	down
CB1 vs HB1	1 - Erythroid	/	TCP1	7.99781e-24	-0.945695	0.072	0.292	1.73376e-19	down
CB1 vs HB1	1 - Erythroid	/	RALY	8.35525e-24	-0.764249	0.053	0.25	1.81125e-19	down
CB1 vs HB1	1 - Erythroid	/	HIKESHI	1.09072e-23	-0.612858	0.032	0.198	2.36446e-19	down
CB1 vs HB1	1 - Erythroid	/	GART	1.1058e-23	-0.252547	0.006	0.104	2.39714e-19	down
CB1 vs HB1	1 - Erythroid	/	EIF3E	1.15218e-23	-0.803518	0.054	0.25	2.4977e-19	down
CB1 vs HB1	1 - Erythroid	/	SRRT	1.18496e-23	-0.511107	0.01	0.125	2.56875e-19	down
CB1 vs HB1	1 - Erythroid	/	AK2	1.2975e-23	-0.262921	0.006	0.104	2.81272e-19	down
CB1 vs HB1	1 - Erythroid	/	RPL31	1.31473e-23	-1.91147	0.208	0.474	2.85007e-19	down
CB1 vs HB1	1 - Erythroid	/	PPP1CC	1.34231e-23	-0.632565	0.041	0.224	2.90986e-19	down
CB1 vs HB1	1 - Erythroid	/	CDC25B	1.40614e-23	-0.528403	0.012	0.13	3.04823e-19	down
CB1 vs HB1	1 - Erythroid	/	RNASEH2B	1.57655e-23	-0.338134	0.012	0.13	3.41764e-19	down
CB1 vs HB1	1 - Erythroid	/	SPCS2	1.60737e-23	-0.606501	0.026	0.182	3.48447e-19	down
CB1 vs HB1	1 - Erythroid	/	SUPT16H	1.62246e-23	-0.329701	0.01	0.125	3.51718e-19	down
CB1 vs HB1	1 - Erythroid	/	RPL23	2.33013e-23	-1.05309	0.056	0.255	5.05125e-19	down
CB1 vs HB1	1 - Erythroid	/	COX17	2.35867e-23	-0.93276	0.095	0.333	5.11312e-19	down
CB1 vs HB1	1 - Erythroid	/	RPL10A	2.36176e-23	-2.22353	0.149	0.401	5.11982e-19	down
CB1 vs HB1	1 - Erythroid	/	ADRM1	2.71784e-23	-0.673597	0.048	0.24	5.89173e-19	down
CB1 vs HB1	1 - Erythroid	/	KCNH2	2.92439e-23	-0.569394	0.015	0.141	6.3395e-19	down
CB1 vs HB1	1 - Erythroid	/	CCT3	3.04255e-23	-0.647702	0.04	0.219	6.59564e-19	down
CB1 vs HB1	1 - Erythroid	/	IARS	3.20727e-23	-0.599781	0.022	0.167	6.95272e-19	down
CB1 vs HB1	1 - Erythroid	/	MRPL48	3.2974e-23	-0.376708	0.005	0.099	7.1481e-19	down
CB1 vs HB1	1 - Erythroid	/	FH	3.32099e-23	-0.280178	0.005	0.099	7.19924e-19	down
CB1 vs HB1	1 - Erythroid	/	PWP1	3.3729e-23	-0.306085	0.007	0.109	7.31176e-19	down
CB1 vs HB1	1 - Erythroid	/	NDUFB11	3.5247e-23	-1.06429	0.106	0.349	7.64085e-19	down
CB1 vs HB1	1 - Erythroid	/	RPS15	3.75701e-23	-2.26772	0.629	0.797	8.14444e-19	down
CB1 vs HB1	1 - Erythroid	/	OAZ1	3.80033e-23	0.74453	0.972	0.885	8.23835e-19	up
CB1 vs HB1	1 - Erythroid	/	KIF14	3.96822e-23	-0.423605	0.005	0.099	8.6023e-19	down
CB1 vs HB1	1 - Erythroid	/	ITGB3BP	4.00244e-23	-0.219231	0.003	0.083	8.6765e-19	down
CB1 vs HB1	1 - Erythroid	/	LPCAT3	4.13624e-23	-0.455542	0.008	0.115	8.96654e-19	down
CB1 vs HB1	1 - Erythroid	/	SHCBP1	4.26078e-23	-0.316601	0.005	0.099	9.23651e-19	down
CB1 vs HB1	1 - Erythroid	/	PCBP2	4.41633e-23	-1.24632	0.33	0.615	9.57372e-19	down
CB1 vs HB1	1 - Erythroid	/	HSPBP1	4.41878e-23	-0.234167	0.003	0.083	9.57902e-19	down
CB1 vs HB1	1 - Erythroid	/	ARHGAP11A	4.75891e-23	-0.384865	0.003	0.083	1.03164e-18	down
CB1 vs HB1	1 - Erythroid	/	CENPU	4.77389e-23	-0.291194	0.005	0.099	1.03488e-18	down
CB1 vs HB1	1 - Erythroid	/	RPL30	5.08562e-23	-2.22177	0.56	0.76	1.10246e-18	down
CB1 vs HB1	1 - Erythroid	/	SNRPA1	5.14855e-23	-0.42773	0.008	0.115	1.1161e-18	down
CB1 vs HB1	1 - Erythroid	/	NDUFC2	5.24047e-23	-0.735075	0.035	0.203	1.13603e-18	down
CB1 vs HB1	1 - Erythroid	/	CDC5L	5.75043e-23	-0.390373	0.01	0.12	1.24658e-18	down
CB1 vs HB1	1 - Erythroid	/	WDHD1	5.79815e-23	-0.170291	0	0.062	1.25692e-18	down
CB1 vs HB1	1 - Erythroid	/	RRP7A	6.73973e-23	-0.33813	0.01	0.12	1.46104e-18	down
CB1 vs HB1	1 - Erythroid	/	ELOVL1	6.77016e-23	-0.663172	0.04	0.219	1.46764e-18	down
CB1 vs HB1	1 - Erythroid	/	ITGA4	7.05804e-23	-0.613674	0.03	0.193	1.53004e-18	down
CB1 vs HB1	1 - Erythroid	/	GPSM2	7.27094e-23	-0.3292	0.002	0.078	1.57619e-18	down
CB1 vs HB1	1 - Erythroid	/	CENPS	7.52658e-23	-0.233745	0.002	0.078	1.63161e-18	down
CB1 vs HB1	1 - Erythroid	/	PSMC6	7.76394e-23	-0.577639	0.026	0.177	1.68307e-18	down
CB1 vs HB1	1 - Erythroid	/	RDX	7.79111e-23	-0.258203	0.002	0.078	1.68896e-18	down
CB1 vs HB1	1 - Erythroid	/	RPAIN	8.0401e-23	-0.374025	0.01	0.12	1.74293e-18	down
CB1 vs HB1	1 - Erythroid	/	PARP1	8.07969e-23	-0.434348	0.011	0.125	1.75152e-18	down
CB1 vs HB1	1 - Erythroid	/	AC073349.1	8.27638e-23	-0.358873	0.002	0.078	1.79415e-18	down
CB1 vs HB1	1 - Erythroid	/	SUB1	8.90254e-23	-0.802263	0.086	0.318	1.92989e-18	down
CB1 vs HB1	1 - Erythroid	/	MIS18A	9.02194e-23	-0.310019	0.002	0.078	1.95578e-18	down
CB1 vs HB1	1 - Erythroid	/	ORC6	9.17884e-23	-0.304436	0.002	0.078	1.98979e-18	down
CB1 vs HB1	1 - Erythroid	/	QTRT1	1.03115e-22	-0.205575	0.001	0.068	2.23534e-18	down
CB1 vs HB1	1 - Erythroid	/	RPS2	1.08258e-22	-1.72364	0.134	0.375	2.34682e-18	down
CB1 vs HB1	1 - Erythroid	/	PYCR1	1.11478e-22	-0.14583	0.001	0.068	2.41663e-18	down
CB1 vs HB1	1 - Erythroid	/	TRAPPC2L	1.12805e-22	-0.309162	0.005	0.094	2.44538e-18	down
CB1 vs HB1	1 - Erythroid	/	DCTPP1	1.13514e-22	-0.169331	0.001	0.073	2.46075e-18	down
CB1 vs HB1	1 - Erythroid	/	ESCO2	1.13514e-22	-0.257748	0.001	0.073	2.46075e-18	down
CB1 vs HB1	1 - Erythroid	/	POC1A	1.14554e-22	-0.224807	0.001	0.073	2.48329e-18	down
CB1 vs HB1	1 - Erythroid	/	SUV39H1	1.16661e-22	-0.240273	0.001	0.073	2.52899e-18	down
CB1 vs HB1	1 - Erythroid	/	RPS12	1.21232e-22	-2.31992	0.866	0.922	2.62807e-18	down
CB1 vs HB1	1 - Erythroid	/	PGD	1.23093e-22	-0.29657	0.006	0.104	2.66841e-18	down
CB1 vs HB1	1 - Erythroid	/	SYNGR1	1.24961e-22	-0.387772	0.005	0.094	2.7089e-18	down
CB1 vs HB1	1 - Erythroid	/	CFL1	1.39488e-22	-1.52711	0.101	0.333	3.02383e-18	down
CB1 vs HB1	1 - Erythroid	/	ATP5F1C	1.5364e-22	-0.801917	0.054	0.245	3.33061e-18	down
CB1 vs HB1	1 - Erythroid	/	RPL34	1.56557e-22	-2.30073	0.318	0.599	3.39384e-18	down
CB1 vs HB1	1 - Erythroid	/	RPS7	1.59295e-22	-2.4056	0.389	0.646	3.4532e-18	down
CB1 vs HB1	1 - Erythroid	/	DDX46	1.68456e-22	-0.600168	0.018	0.151	3.65178e-18	down
CB1 vs HB1	1 - Erythroid	/	SNU13	1.78425e-22	-0.56599	0.032	0.193	3.86789e-18	down
CB1 vs HB1	1 - Erythroid	/	SF3B2	1.98136e-22	-0.674957	0.032	0.193	4.2952e-18	down
CB1 vs HB1	1 - Erythroid	/	ATP5MC2	2.33555e-22	-1.01575	0.048	0.229	5.06301e-18	down
CB1 vs HB1	1 - Erythroid	/	SNRNP40	2.83139e-22	-0.395839	0.006	0.099	6.13789e-18	down
CB1 vs HB1	1 - Erythroid	/	CD58	3.11595e-22	-0.350966	0.008	0.109	6.75476e-18	down
CB1 vs HB1	1 - Erythroid	/	THOC6	3.27729e-22	-0.239304	0.004	0.089	7.10451e-18	down
CB1 vs HB1	1 - Erythroid	/	ARL4A	3.3803e-22	1.08756	0.802	0.469	7.32781e-18	up
CB1 vs HB1	1 - Erythroid	/	DCXR	3.38587e-22	-0.801004	0.076	0.292	7.33989e-18	down
CB1 vs HB1	1 - Erythroid	/	PPIH	3.40315e-22	-0.301762	0.004	0.089	7.37735e-18	down
CB1 vs HB1	1 - Erythroid	/	SNRPA	3.48142e-22	-0.297886	0.009	0.115	7.54703e-18	down
CB1 vs HB1	1 - Erythroid	/	VMA21	3.56051e-22	-0.361911	0.004	0.089	7.71847e-18	down
CB1 vs HB1	1 - Erythroid	/	USP14	3.61598e-22	-0.7849	0.037	0.203	7.83872e-18	down
CB1 vs HB1	1 - Erythroid	/	NDUFA10	3.83639e-22	-0.550747	0.029	0.182	8.31653e-18	down
CB1 vs HB1	1 - Erythroid	/	ACOT7	3.83893e-22	-0.292616	0.004	0.089	8.32203e-18	down
CB1 vs HB1	1 - Erythroid	/	CKAP5	4.86069e-22	-0.576831	0.025	0.172	1.0537e-17	down
CB1 vs HB1	1 - Erythroid	/	GCLM	4.88092e-22	-0.402518	0.009	0.115	1.05809e-17	down
CB1 vs HB1	1 - Erythroid	/	TGS1	4.99303e-22	-0.435859	0.01	0.12	1.08239e-17	down
CB1 vs HB1	1 - Erythroid	/	ARL6IP4	4.99318e-22	-0.85984	0.037	0.203	1.08242e-17	down
CB1 vs HB1	1 - Erythroid	/	DDX1	5.3804e-22	-0.292302	0.006	0.099	1.16636e-17	down
CB1 vs HB1	1 - Erythroid	/	AQP1	5.62418e-22	-0.530932	0.016	0.141	1.21921e-17	down
CB1 vs HB1	1 - Erythroid	/	SSB	5.96808e-22	-0.859953	0.091	0.323	1.29376e-17	down
CB1 vs HB1	1 - Erythroid	/	RPS15A	6.20405e-22	-2.46926	0.564	0.755	1.34491e-17	down
CB1 vs HB1	1 - Erythroid	/	ATP5MF	6.96249e-22	-1.31652	0.3	0.583	1.50933e-17	down
CB1 vs HB1	1 - Erythroid	/	RPL39	7.70837e-22	-2.39599	0.256	0.51	1.67102e-17	down
CB1 vs HB1	1 - Erythroid	/	DCTN2	7.77575e-22	-0.778042	0.052	0.24	1.68563e-17	down
CB1 vs HB1	1 - Erythroid	/	CLNS1A	8.26894e-22	-0.292311	0.013	0.13	1.79254e-17	down
CB1 vs HB1	1 - Erythroid	/	NCAPD3	8.28082e-22	-0.413796	0.003	0.083	1.79512e-17	down
CB1 vs HB1	1 - Erythroid	/	POLR2G	8.47245e-22	-0.370015	0.007	0.104	1.83666e-17	down
CB1 vs HB1	1 - Erythroid	/	TCERG1	8.80638e-22	-0.463906	0.007	0.104	1.90905e-17	down
CB1 vs HB1	1 - Erythroid	/	HELLS	8.95309e-22	-0.210852	0.003	0.083	1.94085e-17	down
CB1 vs HB1	1 - Erythroid	/	RPLP2	8.97692e-22	-1.9757	0.561	0.776	1.94602e-17	down
CB1 vs HB1	1 - Erythroid	/	SHMT2	9.27196e-22	-0.2874	0.007	0.104	2.00998e-17	down
CB1 vs HB1	1 - Erythroid	/	PPP4C	9.5436e-22	-0.499563	0.016	0.141	2.06886e-17	down
CB1 vs HB1	1 - Erythroid	/	CDC123	9.63705e-22	-0.303177	0.007	0.104	2.08912e-17	down
CB1 vs HB1	1 - Erythroid	/	VPS4A	9.8314e-22	-0.268499	0.003	0.083	2.13125e-17	down
CB1 vs HB1	1 - Erythroid	/	SNX5	1.0168e-21	-0.344435	0.019	0.151	2.20422e-17	down
CB1 vs HB1	1 - Erythroid	/	PRIM1	1.0302e-21	-0.291701	0.003	0.083	2.23327e-17	down
CB1 vs HB1	1 - Erythroid	/	SRP14	1.11084e-21	-1.01629	0.368	0.661	2.40808e-17	down
CB1 vs HB1	1 - Erythroid	/	APOBEC3B	1.20375e-21	-0.172318	0.003	0.083	2.60949e-17	down
CB1 vs HB1	1 - Erythroid	/	RPS4Y1	1.2828e-21	-1.24801	0.072	0.276	2.78086e-17	down
CB1 vs HB1	1 - Erythroid	/	GLO1	1.36354e-21	-0.352767	0.016	0.141	2.95589e-17	down
CB1 vs HB1	1 - Erythroid	/	ADD2	1.53727e-21	-0.845587	0.051	0.234	3.3325e-17	down
CB1 vs HB1	1 - Erythroid	/	RPS13	1.57961e-21	-2.53433	0.39	0.63	3.42428e-17	down
CB1 vs HB1	1 - Erythroid	/	ATP5F1E	1.6186e-21	-0.969535	0.855	0.906	3.5088e-17	down
CB1 vs HB1	1 - Erythroid	/	HSPA4	1.64694e-21	-0.437223	0.01	0.115	3.57025e-17	down
CB1 vs HB1	1 - Erythroid	/	NSL1	1.85159e-21	-0.502259	0.012	0.125	4.01389e-17	down
CB1 vs HB1	1 - Erythroid	/	RIPOR1	2.04639e-21	-0.323305	0.003	0.078	4.43617e-17	down
CB1 vs HB1	1 - Erythroid	/	RPL18	2.05646e-21	-2.41464	0.384	0.646	4.45799e-17	down
CB1 vs HB1	1 - Erythroid	/	RPL7A	2.07004e-21	-2.87211	0.441	0.672	4.48743e-17	down
CB1 vs HB1	1 - Erythroid	/	TXN	2.08217e-21	-0.89979	0.138	0.391	4.51372e-17	down
CB1 vs HB1	1 - Erythroid	/	KIF11	2.09689e-21	-0.328937	0.003	0.078	4.54563e-17	down
CB1 vs HB1	1 - Erythroid	/	RPL26L1	2.13123e-21	-0.237809	0.003	0.078	4.62009e-17	down
CB1 vs HB1	1 - Erythroid	/	FKBP3	2.15638e-21	-0.390646	0.01	0.115	4.67459e-17	down
CB1 vs HB1	1 - Erythroid	/	UXT	2.1594e-21	-0.816043	0.083	0.302	4.68115e-17	down
CB1 vs HB1	1 - Erythroid	/	GAS2L3	2.27428e-21	-0.383744	0.003	0.078	4.93017e-17	down
CB1 vs HB1	1 - Erythroid	/	ANAPC15	2.56228e-21	-0.446046	0.019	0.151	5.5545e-17	down
CB1 vs HB1	1 - Erythroid	/	MRPL37	2.97184e-21	-0.755641	0.054	0.24	6.44235e-17	down
CB1 vs HB1	1 - Erythroid	/	LDHB	3.04279e-21	-1.07433	0.05	0.229	6.59616e-17	down
CB1 vs HB1	1 - Erythroid	/	LMAN2	3.39087e-21	-0.394274	0.017	0.141	7.35072e-17	down
CB1 vs HB1	1 - Erythroid	/	MRPS21	3.5668e-21	-0.678626	0.038	0.203	7.73211e-17	down
CB1 vs HB1	1 - Erythroid	/	CHEK1	3.58879e-21	-0.143468	0	0.057	7.77978e-17	down
CB1 vs HB1	1 - Erythroid	/	WDR76	3.58879e-21	-0.147359	0	0.057	7.77978e-17	down
CB1 vs HB1	1 - Erythroid	/	CDC6	3.58879e-21	-0.211389	0	0.057	7.77978e-17	down
CB1 vs HB1	1 - Erythroid	/	CPSF7	3.70986e-21	-0.396034	0.002	0.073	8.04223e-17	down
CB1 vs HB1	1 - Erythroid	/	COPS8	3.71281e-21	-0.2607	0.006	0.099	8.04864e-17	down
CB1 vs HB1	1 - Erythroid	/	PRDX2	3.72565e-21	-1.49697	0.984	0.958	8.07647e-17	down
CB1 vs HB1	1 - Erythroid	/	CENPX	3.73723e-21	-0.290467	0.006	0.099	8.10156e-17	down
CB1 vs HB1	1 - Erythroid	/	CENPP	3.90464e-21	-0.298797	0.002	0.073	8.46448e-17	down
CB1 vs HB1	1 - Erythroid	/	GTF3A	3.99217e-21	-0.55329	0.025	0.167	8.65423e-17	down
CB1 vs HB1	1 - Erythroid	/	DPM3	4.15016e-21	-0.27004	0.006	0.099	8.99672e-17	down
CB1 vs HB1	1 - Erythroid	/	CYB5B	4.32506e-21	-0.281767	0.002	0.073	9.37586e-17	down
CB1 vs HB1	1 - Erythroid	/	APOC1	4.43698e-21	-0.290543	0.002	0.073	9.61848e-17	down
CB1 vs HB1	1 - Erythroid	/	BUB1B	4.55176e-21	-0.254027	0.002	0.073	9.8673e-17	down
CB1 vs HB1	1 - Erythroid	/	SUMO3	4.67189e-21	-0.738023	0.031	0.182	1.01277e-16	down
CB1 vs HB1	1 - Erythroid	/	MRPL9	4.79167e-21	-0.23869	0.005	0.089	1.03874e-16	down
CB1 vs HB1	1 - Erythroid	/	NDC80	4.85558e-21	-0.297753	0.006	0.099	1.05259e-16	down
CB1 vs HB1	1 - Erythroid	/	COA1	5.22228e-21	-0.244668	0.005	0.089	1.13209e-16	down
CB1 vs HB1	1 - Erythroid	/	TMEM106C	5.33578e-21	-0.280715	0.005	0.089	1.15669e-16	down
CB1 vs HB1	1 - Erythroid	/	NUP54	5.37415e-21	-0.226337	0.005	0.089	1.16501e-16	down
CB1 vs HB1	1 - Erythroid	/	RPS6	5.52302e-21	-2.8841	0.349	0.583	1.19728e-16	down
CB1 vs HB1	1 - Erythroid	/	CIB1	5.8846e-21	-0.537129	0.019	0.146	1.27566e-16	down
CB1 vs HB1	1 - Erythroid	/	ALG9	6.02621e-21	-0.29537	0.001	0.062	1.30636e-16	down
CB1 vs HB1	1 - Erythroid	/	IVD	6.10478e-21	-0.227386	0.001	0.068	1.32339e-16	down
CB1 vs HB1	1 - Erythroid	/	FBL	6.11976e-21	-0.521654	0.02	0.151	1.32664e-16	down
CB1 vs HB1	1 - Erythroid	/	BYSL	6.20399e-21	-0.327426	0.001	0.062	1.3449e-16	down
CB1 vs HB1	1 - Erythroid	/	STAG1	6.27234e-21	-0.187727	0.001	0.068	1.35972e-16	down
CB1 vs HB1	1 - Erythroid	/	RAD50	6.30399e-21	-0.36506	0.008	0.104	1.36658e-16	down
CB1 vs HB1	1 - Erythroid	/	RPF2	6.32538e-21	-0.313741	0.001	0.062	1.37122e-16	down
CB1 vs HB1	1 - Erythroid	/	THOP1	6.51189e-21	-0.253882	0.001	0.062	1.41165e-16	down
CB1 vs HB1	1 - Erythroid	/	RFC2	6.56179e-21	-0.194552	0.001	0.068	1.42247e-16	down
CB1 vs HB1	1 - Erythroid	/	PLK4	6.63924e-21	-0.137216	0.001	0.062	1.43925e-16	down
CB1 vs HB1	1 - Erythroid	/	GGH	6.86444e-21	-0.235646	0.001	0.068	1.48807e-16	down
CB1 vs HB1	1 - Erythroid	/	MORF4L2	6.96204e-21	-0.359929	0.008	0.104	1.50923e-16	down
CB1 vs HB1	1 - Erythroid	/	YWHAE	8.22645e-21	-0.891752	0.046	0.219	1.78333e-16	down
CB1 vs HB1	1 - Erythroid	/	TLN1	8.39848e-21	-0.508708	0.019	0.146	1.82062e-16	down
CB1 vs HB1	1 - Erythroid	/	FAU	8.62137e-21	-1.7597	0.439	0.667	1.86894e-16	down
CB1 vs HB1	1 - Erythroid	/	RPS19	8.64314e-21	-2.72046	0.333	0.573	1.87366e-16	down
CB1 vs HB1	1 - Erythroid	/	U2SURP	8.67418e-21	-0.440615	0.014	0.13	1.88039e-16	down
CB1 vs HB1	1 - Erythroid	/	TUFM	9.08617e-21	-0.697007	0.036	0.193	1.9697e-16	down
CB1 vs HB1	1 - Erythroid	/	LSM8	9.11802e-21	-0.408928	0.009	0.109	1.9766e-16	down
CB1 vs HB1	1 - Erythroid	/	GSTP1	9.41132e-21	-0.964788	0.092	0.307	2.04019e-16	down
CB1 vs HB1	1 - Erythroid	/	SNHG16	9.44753e-21	-0.30035	0.009	0.109	2.04804e-16	down
CB1 vs HB1	1 - Erythroid	/	AARS	1.07824e-20	-0.381661	0.012	0.12	2.33741e-16	down
CB1 vs HB1	1 - Erythroid	/	SEC11A	1.09222e-20	-0.324262	0.014	0.13	2.36771e-16	down
CB1 vs HB1	1 - Erythroid	/	TIMM13	1.12116e-20	-0.388382	0.017	0.141	2.43045e-16	down
CB1 vs HB1	1 - Erythroid	/	H2AFV	1.12444e-20	-0.449447	0.013	0.125	2.43757e-16	down
CB1 vs HB1	1 - Erythroid	/	MAP1LC3B	1.13753e-20	0.729065	0.835	0.516	2.46594e-16	up
CB1 vs HB1	1 - Erythroid	/	DKC1	1.15497e-20	-0.284656	0.009	0.109	2.50375e-16	down
CB1 vs HB1	1 - Erythroid	/	DRG1	1.24565e-20	-0.348454	0.01	0.115	2.70031e-16	down
CB1 vs HB1	1 - Erythroid	/	NUP58	1.30278e-20	-0.399351	0.006	0.094	2.82416e-16	down
CB1 vs HB1	1 - Erythroid	/	CS	1.31153e-20	-0.369176	0.006	0.094	2.84313e-16	down
CB1 vs HB1	1 - Erythroid	/	EIF3G	1.404e-20	-0.589888	0.045	0.219	3.04359e-16	down
CB1 vs HB1	1 - Erythroid	/	MRPS18B	1.44034e-20	-0.339487	0.006	0.094	3.12237e-16	down
CB1 vs HB1	1 - Erythroid	/	GGNBP2	1.4717e-20	-0.465145	0.012	0.12	3.19035e-16	down
CB1 vs HB1	1 - Erythroid	/	SMIM7	1.48649e-20	-0.442859	0.022	0.156	3.22242e-16	down
CB1 vs HB1	1 - Erythroid	/	CDK1	1.58455e-20	-0.359098	0.004	0.083	3.43498e-16	down
CB1 vs HB1	1 - Erythroid	/	CCDC34	1.65434e-20	-0.300287	0.009	0.109	3.58628e-16	down
CB1 vs HB1	1 - Erythroid	/	EEF1G	1.67799e-20	-1.80011	0.201	0.448	3.63755e-16	down
CB1 vs HB1	1 - Erythroid	/	SGO1	1.69088e-20	-0.355478	0.006	0.094	3.6655e-16	down
CB1 vs HB1	1 - Erythroid	/	RPL28	1.71693e-20	-2.44513	0.531	0.719	3.72196e-16	down
CB1 vs HB1	1 - Erythroid	/	EMD	1.865e-20	-0.465314	0.03	0.177	4.04294e-16	down
CB1 vs HB1	1 - Erythroid	/	MRPS11	2.05166e-20	-0.248725	0.006	0.094	4.44759e-16	down
CB1 vs HB1	1 - Erythroid	/	EMC6	2.12244e-20	-0.52526	0.017	0.141	4.60103e-16	down
CB1 vs HB1	1 - Erythroid	/	SRSF10	2.50401e-20	-0.758954	0.023	0.156	5.4282e-16	down
CB1 vs HB1	1 - Erythroid	/	MRPL27	2.58578e-20	-0.384751	0.016	0.135	5.60545e-16	down
CB1 vs HB1	1 - Erythroid	/	POLDIP2	2.5974e-20	-0.377593	0.028	0.172	5.63064e-16	down
CB1 vs HB1	1 - Erythroid	/	MPP1	2.60447e-20	0.598103	0.975	0.771	5.64597e-16	up
CB1 vs HB1	1 - Erythroid	/	MZT2B	3.39305e-20	-0.4573	0.007	0.099	7.35546e-16	down
CB1 vs HB1	1 - Erythroid	/	ATP5MPL	3.40732e-20	-0.673601	0.057	0.245	7.3864e-16	down
CB1 vs HB1	1 - Erythroid	/	CCNH	3.99523e-20	-0.228226	0.007	0.099	8.66085e-16	down
CB1 vs HB1	1 - Erythroid	/	UQCC3	4.04878e-20	-0.335568	0.003	0.078	8.77695e-16	down
CB1 vs HB1	1 - Erythroid	/	METTL2A	4.30474e-20	-0.351894	0.003	0.078	9.33181e-16	down
CB1 vs HB1	1 - Erythroid	/	SLC37A4	4.33783e-20	-0.282768	0.003	0.078	9.40356e-16	down
CB1 vs HB1	1 - Erythroid	/	RPL35A	4.53208e-20	-1.93707	0.55	0.766	9.82465e-16	down
CB1 vs HB1	1 - Erythroid	/	FAH	4.56105e-20	-0.271237	0.008	0.104	9.88744e-16	down
CB1 vs HB1	1 - Erythroid	/	TMEM141	4.56374e-20	-0.302055	0.011	0.115	9.89327e-16	down
CB1 vs HB1	1 - Erythroid	/	CTPS1	4.68297e-20	-0.194824	0.003	0.078	1.01517e-15	down
CB1 vs HB1	1 - Erythroid	/	BAX	4.8421e-20	-0.341636	0.008	0.104	1.04967e-15	down
CB1 vs HB1	1 - Erythroid	/	SMARCB1	5.04895e-20	-0.346859	0.008	0.104	1.09451e-15	down
CB1 vs HB1	1 - Erythroid	/	C9orf78	5.12532e-20	0.841382	0.849	0.594	1.11107e-15	up
CB1 vs HB1	1 - Erythroid	/	PRR11	5.1725e-20	-0.268766	0.003	0.078	1.12129e-15	down
CB1 vs HB1	1 - Erythroid	/	NOL12	5.37025e-20	-0.300245	0.005	0.089	1.16416e-15	down
CB1 vs HB1	1 - Erythroid	/	PPP1CA	5.53629e-20	-1.01159	0.085	0.292	1.20016e-15	down
CB1 vs HB1	1 - Erythroid	/	RACK1	5.53966e-20	-2.10733	0.304	0.552	1.20089e-15	down
CB1 vs HB1	1 - Erythroid	/	CAMTA1	5.55715e-20	-0.257865	0.005	0.089	1.20468e-15	down
CB1 vs HB1	1 - Erythroid	/	HP1BP3	5.90361e-20	-1.0417	0.068	0.26	1.27979e-15	down
CB1 vs HB1	1 - Erythroid	/	PSMA1	6.62091e-20	-0.662384	0.047	0.219	1.43528e-15	down
CB1 vs HB1	1 - Erythroid	/	KPNA3	6.63769e-20	-0.323708	0.005	0.089	1.43892e-15	down
CB1 vs HB1	1 - Erythroid	/	RAB2A	7.28182e-20	-0.357898	0.011	0.115	1.57855e-15	down
CB1 vs HB1	1 - Erythroid	/	RPL13A	7.33897e-20	-1.59117	0.203	0.448	1.59094e-15	down
CB1 vs HB1	1 - Erythroid	/	TUBB2A	7.87426e-20	-1.02297	0.161	0.427	1.70698e-15	down
CB1 vs HB1	1 - Erythroid	/	PRKAB1	8.16966e-20	-0.398969	0.011	0.115	1.77102e-15	down
CB1 vs HB1	1 - Erythroid	/	METTL9	8.70265e-20	-0.56184	0.033	0.182	1.88656e-15	down
CB1 vs HB1	1 - Erythroid	/	RTRAF	8.89987e-20	-0.713196	0.063	0.25	1.92931e-15	down
CB1 vs HB1	1 - Erythroid	/	RPL26	9.01136e-20	-2.56642	0.323	0.562	1.95348e-15	down
CB1 vs HB1	1 - Erythroid	/	HNRNPM	9.35963e-20	-0.726746	0.035	0.188	2.02898e-15	down
CB1 vs HB1	1 - Erythroid	/	NDUFA9	1.05126e-19	-0.333525	0.006	0.094	2.27892e-15	down
CB1 vs HB1	1 - Erythroid	/	TMEM14C	1.08016e-19	-1.78393	0.218	0.464	2.34157e-15	down
CB1 vs HB1	1 - Erythroid	/	MAT2A	1.09255e-19	-0.397382	0.006	0.094	2.36843e-15	down
CB1 vs HB1	1 - Erythroid	/	ERVK3-1	1.09598e-19	-0.24472	0.003	0.073	2.37587e-15	down
CB1 vs HB1	1 - Erythroid	/	TENT5C	1.15462e-19	0.701277	0.937	0.641	2.50299e-15	up
CB1 vs HB1	1 - Erythroid	/	RPL14	1.16484e-19	-3.07952	0.253	0.484	2.52515e-15	down
CB1 vs HB1	1 - Erythroid	/	EIF3D	1.1948e-19	-0.61716	0.051	0.224	2.59008e-15	down
CB1 vs HB1	1 - Erythroid	/	PPCDC	1.20609e-19	-0.255427	0.003	0.073	2.61457e-15	down
CB1 vs HB1	1 - Erythroid	/	NDUFB8	1.4109e-19	-1.04644	0.132	0.365	3.05855e-15	down
CB1 vs HB1	1 - Erythroid	/	POLR2E	1.45649e-19	-0.639015	0.048	0.219	3.15737e-15	down
CB1 vs HB1	1 - Erythroid	/	RPS23	1.62657e-19	-2.93215	0.342	0.568	3.52608e-15	down
CB1 vs HB1	1 - Erythroid	/	CEP44	1.68932e-19	-0.36629	0.005	0.083	3.66211e-15	down
CB1 vs HB1	1 - Erythroid	/	H3F3B	1.73187e-19	-1.58206	0.14	0.38	3.75435e-15	down
CB1 vs HB1	1 - Erythroid	/	RPL32	1.77034e-19	-2.54061	0.57	0.745	3.83774e-15	down
CB1 vs HB1	1 - Erythroid	/	BAZ1A	1.81717e-19	-0.393354	0.008	0.099	3.93926e-15	down
CB1 vs HB1	1 - Erythroid	/	PRMT5	1.8252e-19	-0.281302	0.005	0.083	3.95666e-15	down
CB1 vs HB1	1 - Erythroid	/	AIMP1	1.83936e-19	-0.354853	0.008	0.099	3.98736e-15	down
CB1 vs HB1	1 - Erythroid	/	LAP3	1.9038e-19	-0.301539	0.005	0.083	4.12707e-15	down
CB1 vs HB1	1 - Erythroid	/	BCAS2	1.93083e-19	-0.389897	0.008	0.099	4.18566e-15	down
CB1 vs HB1	1 - Erythroid	/	SAE1	2.01384e-19	-0.286889	0.005	0.083	4.3656e-15	down
CB1 vs HB1	1 - Erythroid	/	SNAP29	2.07068e-19	-0.297592	0.012	0.115	4.48881e-15	down
CB1 vs HB1	1 - Erythroid	/	SMPD4	2.11526e-19	-0.266457	0.005	0.083	4.58547e-15	down
CB1 vs HB1	1 - Erythroid	/	NUP93	2.13016e-19	-0.221076	0.005	0.083	4.61775e-15	down
CB1 vs HB1	1 - Erythroid	/	HDDC2	2.13083e-19	-0.365812	0.009	0.104	4.6192e-15	down
CB1 vs HB1	1 - Erythroid	/	UBLCP1	2.16221e-19	-0.217482	0.002	0.068	4.68724e-15	down
CB1 vs HB1	1 - Erythroid	/	AUNIP	2.21971e-19	-0.144245	0	0.052	4.81189e-15	down
CB1 vs HB1	1 - Erythroid	/	FOXRED1	2.25487e-19	-0.236119	0.002	0.068	4.8881e-15	down
CB1 vs HB1	1 - Erythroid	/	MRPS17	2.27386e-19	-0.209187	0.002	0.068	4.92928e-15	down
CB1 vs HB1	1 - Erythroid	/	NOP58	2.34387e-19	-0.267441	0.008	0.099	5.08104e-15	down
CB1 vs HB1	1 - Erythroid	/	ASF1B	2.39121e-19	-0.224395	0.002	0.068	5.18367e-15	down
CB1 vs HB1	1 - Erythroid	/	RPS9	2.47192e-19	-2.39615	0.295	0.526	5.35863e-15	down
CB1 vs HB1	1 - Erythroid	/	TRIM58	2.4908e-19	0.81926	0.782	0.448	5.39957e-15	up
CB1 vs HB1	1 - Erythroid	/	APRT	2.53143e-19	-0.593274	0.03	0.172	5.48764e-15	down
CB1 vs HB1	1 - Erythroid	/	EIF3H	2.61045e-19	-1.00049	0.132	0.359	5.65893e-15	down
CB1 vs HB1	1 - Erythroid	/	NCL	2.74945e-19	-1.03941	0.118	0.344	5.96025e-15	down
CB1 vs HB1	1 - Erythroid	/	TAF9	2.77946e-19	-0.476588	0.028	0.167	6.02531e-15	down
CB1 vs HB1	1 - Erythroid	/	SLC25A6	3.2109e-19	-1.08527	0.156	0.396	6.9606e-15	down
CB1 vs HB1	1 - Erythroid	/	MKRN1	3.38144e-19	0.783305	0.73	0.385	7.33029e-15	up
CB1 vs HB1	1 - Erythroid	/	FADS1	3.39322e-19	-0.258195	0.001	0.062	7.35582e-15	down
CB1 vs HB1	1 - Erythroid	/	PRPS1	3.40287e-19	-0.234949	0.01	0.109	7.37675e-15	down
CB1 vs HB1	1 - Erythroid	/	KIF18B	3.42362e-19	-0.328263	0.001	0.062	7.42173e-15	down
CB1 vs HB1	1 - Erythroid	/	MND1	3.54795e-19	-0.212064	0.001	0.062	7.69124e-15	down
CB1 vs HB1	1 - Erythroid	/	GNG10	3.57626e-19	-0.28204	0.01	0.109	7.75261e-15	down
CB1 vs HB1	1 - Erythroid	/	R3HCC1	3.57972e-19	-0.220196	0.001	0.062	7.76011e-15	down
CB1 vs HB1	1 - Erythroid	/	PSMA5	3.65135e-19	-0.544302	0.028	0.167	7.91539e-15	down
CB1 vs HB1	1 - Erythroid	/	DNA2	3.71291e-19	-0.235179	0.001	0.057	8.04885e-15	down
CB1 vs HB1	1 - Erythroid	/	CLSPN	3.81013e-19	-0.193524	0.001	0.062	8.2596e-15	down
CB1 vs HB1	1 - Erythroid	/	XPNPEP1	3.81013e-19	-0.159966	0.001	0.062	8.2596e-15	down
CB1 vs HB1	1 - Erythroid	/	ACYP1	3.81013e-19	-0.13736	0.001	0.062	8.2596e-15	down
CB1 vs HB1	1 - Erythroid	/	UHRF1	3.8216e-19	-0.158486	0.001	0.057	8.28446e-15	down
CB1 vs HB1	1 - Erythroid	/	HSP90B1	3.85159e-19	-0.599502	0.023	0.151	8.34947e-15	down
CB1 vs HB1	1 - Erythroid	/	DTL	3.89579e-19	-0.227052	0.001	0.057	8.4453e-15	down
CB1 vs HB1	1 - Erythroid	/	TFG	4.0851e-19	-0.503016	0.015	0.125	8.85569e-15	down
CB1 vs HB1	1 - Erythroid	/	RPLP1	4.49988e-19	-2.38789	0.775	0.875	9.75485e-15	down
CB1 vs HB1	1 - Erythroid	/	DNAJB1	4.89319e-19	-0.519045	0.028	0.167	1.06075e-14	down
CB1 vs HB1	1 - Erythroid	/	PCK2	4.9628e-19	-0.502386	0.021	0.146	1.07584e-14	down
CB1 vs HB1	1 - Erythroid	/	POLR2K	5.07037e-19	-0.579054	0.038	0.193	1.09916e-14	down
CB1 vs HB1	1 - Erythroid	/	ARV1	5.32102e-19	-0.286029	0.006	0.089	1.15349e-14	down
CB1 vs HB1	1 - Erythroid	/	RIC8A	5.32147e-19	-0.395485	0.015	0.125	1.15359e-14	down
CB1 vs HB1	1 - Erythroid	/	COPS9	5.3286e-19	-0.52283	0.021	0.146	1.15513e-14	down
CB1 vs HB1	1 - Erythroid	/	SF3B5	5.37738e-19	-0.829394	0.101	0.318	1.16571e-14	down
CB1 vs HB1	1 - Erythroid	/	GUSB	5.60641e-19	-0.277422	0.006	0.089	1.21536e-14	down
CB1 vs HB1	1 - Erythroid	/	TMEM258	6.10189e-19	-0.561471	0.043	0.203	1.32277e-14	down
CB1 vs HB1	1 - Erythroid	/	MT-ND1	6.13661e-19	-1.32594	0.429	0.682	1.33029e-14	down
CB1 vs HB1	1 - Erythroid	/	PPIE	6.69964e-19	-0.222285	0.004	0.078	1.45235e-14	down
CB1 vs HB1	1 - Erythroid	/	TMEM256	6.99849e-19	-0.613481	0.032	0.177	1.51713e-14	down
CB1 vs HB1	1 - Erythroid	/	NDUFB2	7.22571e-19	-0.647683	0.045	0.208	1.56639e-14	down
CB1 vs HB1	1 - Erythroid	/	MRPL40	8.1924e-19	-0.296263	0.007	0.094	1.77595e-14	down
CB1 vs HB1	1 - Erythroid	/	DDX18	8.27263e-19	-0.454236	0.012	0.115	1.79334e-14	down
CB1 vs HB1	1 - Erythroid	/	ADH5	9.15211e-19	-0.346658	0.007	0.094	1.98399e-14	down
CB1 vs HB1	1 - Erythroid	/	PSMD1	9.18821e-19	-0.666734	0.041	0.198	1.99182e-14	down
CB1 vs HB1	1 - Erythroid	/	RPL19	1.06404e-18	-2.52274	0.472	0.667	2.30662e-14	down
CB1 vs HB1	1 - Erythroid	/	VRK1	1.06471e-18	-0.514825	0.023	0.151	2.30809e-14	down
CB1 vs HB1	1 - Erythroid	/	TSPAN17	1.10042e-18	-0.543217	0.012	0.115	2.38548e-14	down
CB1 vs HB1	1 - Erythroid	/	TMX1	1.12086e-18	-0.258928	0.007	0.094	2.4298e-14	down
CB1 vs HB1	1 - Erythroid	/	RPS11	1.19069e-18	-1.20416	0.271	0.526	2.58117e-14	down
CB1 vs HB1	1 - Erythroid	/	EIF2A	1.20038e-18	-0.398878	0.02	0.141	2.60219e-14	down
CB1 vs HB1	1 - Erythroid	/	COX7C	1.20566e-18	-1.21402	0.256	0.505	2.61362e-14	down
CB1 vs HB1	1 - Erythroid	/	DNAJC19	1.27638e-18	-0.356125	0.011	0.109	2.76694e-14	down
CB1 vs HB1	1 - Erythroid	/	COX7A2L	1.28064e-18	-0.899734	0.09	0.292	2.77618e-14	down
CB1 vs HB1	1 - Erythroid	/	CA1	1.33507e-18	0.73242	0.76	0.396	2.89416e-14	up
CB1 vs HB1	1 - Erythroid	/	PARK7	1.36625e-18	-0.779893	0.084	0.281	2.96175e-14	down
CB1 vs HB1	1 - Erythroid	/	COMMD6	1.37033e-18	-0.463837	0.023	0.151	2.9706e-14	down
CB1 vs HB1	1 - Erythroid	/	POLR3GL	1.4057e-18	-0.506406	0.011	0.109	3.04727e-14	down
CB1 vs HB1	1 - Erythroid	/	MRPL3	1.41503e-18	-0.256964	0.008	0.099	3.0675e-14	down
CB1 vs HB1	1 - Erythroid	/	HSP90AB1	1.44107e-18	-1.47801	0.317	0.583	3.12396e-14	down
CB1 vs HB1	1 - Erythroid	/	MRPL38	1.45775e-18	-0.5051	0.01	0.104	3.16011e-14	down
CB1 vs HB1	1 - Erythroid	/	RPL29	1.76102e-18	-2.52141	0.478	0.698	3.81754e-14	down
CB1 vs HB1	1 - Erythroid	/	C11orf98	1.80201e-18	-0.449872	0.016	0.125	3.90641e-14	down
CB1 vs HB1	1 - Erythroid	/	PAM16	1.83156e-18	-0.412453	0.01	0.104	3.97046e-14	down
CB1 vs HB1	1 - Erythroid	/	GOT2	1.84296e-18	-0.239496	0.005	0.083	3.99517e-14	down
CB1 vs HB1	1 - Erythroid	/	C16orf95	1.85534e-18	-0.279795	0.005	0.083	4.022e-14	down
CB1 vs HB1	1 - Erythroid	/	RFC3	1.86779e-18	-0.280826	0.005	0.083	4.049e-14	down
CB1 vs HB1	1 - Erythroid	/	MRPL45	1.86892e-18	-0.283651	0.003	0.073	4.05145e-14	down
CB1 vs HB1	1 - Erythroid	/	RUVBL1	1.95503e-18	-0.248644	0.003	0.073	4.23811e-14	down
CB1 vs HB1	1 - Erythroid	/	HNRNPUL2	2.13916e-18	-0.262322	0.003	0.073	4.63727e-14	down
CB1 vs HB1	1 - Erythroid	/	PLRG1	2.14931e-18	-0.299528	0.005	0.083	4.65927e-14	down
CB1 vs HB1	1 - Erythroid	/	RER1	2.15745e-18	-0.650804	0.036	0.182	4.67693e-14	down
CB1 vs HB1	1 - Erythroid	/	C19orf53	2.18264e-18	-0.752009	0.08	0.276	4.73153e-14	down
CB1 vs HB1	1 - Erythroid	/	NEK2	2.23717e-18	-0.381432	0.005	0.083	4.84974e-14	down
CB1 vs HB1	1 - Erythroid	/	FKBP8	2.57472e-18	0.637108	0.937	0.729	5.58148e-14	up
CB1 vs HB1	1 - Erythroid	/	NDUFB10	2.58459e-18	-0.511579	0.048	0.214	5.60288e-14	down
CB1 vs HB1	1 - Erythroid	/	CAPZA2	2.69621e-18	-0.988593	0.097	0.307	5.84485e-14	down
CB1 vs HB1	1 - Erythroid	/	PSMG2	2.75333e-18	-0.339507	0.019	0.135	5.96867e-14	down
CB1 vs HB1	1 - Erythroid	/	CACYBP	3.05949e-18	-0.665865	0.023	0.146	6.63236e-14	down
CB1 vs HB1	1 - Erythroid	/	MDH1	3.21786e-18	-0.479083	0.036	0.182	6.97568e-14	down
CB1 vs HB1	1 - Erythroid	/	PSMA6	3.31357e-18	-0.799238	0.091	0.292	7.18316e-14	down
CB1 vs HB1	1 - Erythroid	/	LSM6	3.3664e-18	-0.386982	0.006	0.089	7.29768e-14	down
CB1 vs HB1	1 - Erythroid	/	EIF3I	3.51361e-18	-0.506168	0.034	0.177	7.61681e-14	down
CB1 vs HB1	1 - Erythroid	/	NOLC1	3.67493e-18	-0.273592	0.006	0.089	7.96651e-14	down
CB1 vs HB1	1 - Erythroid	/	HMG20B	4.00161e-18	-0.394651	0.017	0.13	8.67469e-14	down
CB1 vs HB1	1 - Erythroid	/	MRPL4	4.11293e-18	-0.315597	0.006	0.089	8.916e-14	down
CB1 vs HB1	1 - Erythroid	/	EIF3A	4.26579e-18	-0.609817	0.047	0.208	9.24738e-14	down
CB1 vs HB1	1 - Erythroid	/	FIBP	4.29684e-18	-0.230806	0.006	0.089	9.31469e-14	down
CB1 vs HB1	1 - Erythroid	/	HAX1	4.38193e-18	-0.511496	0.028	0.161	9.49915e-14	down
CB1 vs HB1	1 - Erythroid	/	HDAC2	4.52559e-18	-0.58478	0.07	0.255	9.81058e-14	down
CB1 vs HB1	1 - Erythroid	/	NOL11	4.68937e-18	-0.256347	0.006	0.089	1.01656e-13	down
CB1 vs HB1	1 - Erythroid	/	NDUFA12	4.74327e-18	-0.313592	0.014	0.12	1.02825e-13	down
CB1 vs HB1	1 - Erythroid	/	GLOD4	4.74789e-18	-0.2963	0.003	0.068	1.02925e-13	down
CB1 vs HB1	1 - Erythroid	/	CDKN2AIPNL	4.89913e-18	-0.188505	0.003	0.068	1.06203e-13	down
CB1 vs HB1	1 - Erythroid	/	JPT2	4.89913e-18	-0.175793	0.003	0.068	1.06203e-13	down
CB1 vs HB1	1 - Erythroid	/	MRPL17	5.01567e-18	-0.249202	0.003	0.068	1.0873e-13	down
CB1 vs HB1	1 - Erythroid	/	UBR7	5.05512e-18	-0.202691	0.003	0.068	1.09585e-13	down
CB1 vs HB1	1 - Erythroid	/	NOP56	5.09487e-18	-0.226999	0.003	0.068	1.10447e-13	down
CB1 vs HB1	1 - Erythroid	/	PPP2R5D	5.25702e-18	-0.273045	0.003	0.068	1.13962e-13	down
CB1 vs HB1	1 - Erythroid	/	CD36	5.37347e-18	-1.13184	0.163	0.401	1.16486e-13	down
CB1 vs HB1	1 - Erythroid	/	CDC7	5.50982e-18	-0.256802	0.003	0.068	1.19442e-13	down
CB1 vs HB1	1 - Erythroid	/	NIP7	5.55311e-18	-0.301345	0.003	0.068	1.2038e-13	down
CB1 vs HB1	1 - Erythroid	/	TMEM126A	5.64069e-18	-0.227651	0.003	0.068	1.22279e-13	down
CB1 vs HB1	1 - Erythroid	/	NFYC	6.0293e-18	-0.282035	0.008	0.094	1.30703e-13	down
CB1 vs HB1	1 - Erythroid	/	SNRNP70	6.06502e-18	-0.347503	0.008	0.094	1.31477e-13	down
CB1 vs HB1	1 - Erythroid	/	SNHG29	6.40499e-18	-1.86424	0.169	0.396	1.38847e-13	down
CB1 vs HB1	1 - Erythroid	/	EDF1	6.78023e-18	-0.841443	0.134	0.359	1.46982e-13	down
CB1 vs HB1	1 - Erythroid	/	CKAP2	7.05507e-18	-0.682899	0.037	0.182	1.5294e-13	down
CB1 vs HB1	1 - Erythroid	/	ANLN	7.30273e-18	-0.514683	0.005	0.078	1.58308e-13	down
CB1 vs HB1	1 - Erythroid	/	MRPL12	7.30273e-18	-0.298551	0.005	0.078	1.58308e-13	down
CB1 vs HB1	1 - Erythroid	/	CDCA7L	7.45464e-18	-0.294931	0.005	0.078	1.61602e-13	down
CB1 vs HB1	1 - Erythroid	/	EXOSC3	7.4748e-18	-0.314212	0.009	0.099	1.62039e-13	down
CB1 vs HB1	1 - Erythroid	/	AATF	7.50597e-18	-0.256841	0.005	0.078	1.62715e-13	down
CB1 vs HB1	1 - Erythroid	/	PPIP5K2	7.70529e-18	-0.474341	0.04	0.193	1.67035e-13	down
CB1 vs HB1	1 - Erythroid	/	DHX15	7.7503e-18	-0.301159	0.01	0.104	1.68011e-13	down
CB1 vs HB1	1 - Erythroid	/	SPC24	7.81523e-18	-0.26905	0.008	0.094	1.69419e-13	down
CB1 vs HB1	1 - Erythroid	/	CAPRIN1	7.81847e-18	-0.288865	0.009	0.099	1.69489e-13	down
CB1 vs HB1	1 - Erythroid	/	MRPL18	8.68344e-18	-0.314271	0.019	0.135	1.8824e-13	down
CB1 vs HB1	1 - Erythroid	/	POMP	8.6879e-18	-0.953888	0.149	0.38	1.88336e-13	down
CB1 vs HB1	1 - Erythroid	/	M6PR	8.84607e-18	-0.365039	0.009	0.099	1.91765e-13	down
CB1 vs HB1	1 - Erythroid	/	RNF138	9.04673e-18	-0.261531	0.009	0.099	1.96115e-13	down
CB1 vs HB1	1 - Erythroid	/	NONO	9.09657e-18	-0.606739	0.021	0.141	1.97195e-13	down
CB1 vs HB1	1 - Erythroid	/	HNRNPF	9.14531e-18	-0.761758	0.065	0.24	1.98252e-13	down
CB1 vs HB1	1 - Erythroid	/	HNRNPC	9.39999e-18	-0.941661	0.098	0.297	2.03773e-13	down
CB1 vs HB1	1 - Erythroid	/	DDX5	9.57991e-18	-0.991111	0.112	0.323	2.07673e-13	down
CB1 vs HB1	1 - Erythroid	/	SEPTIN7	9.65598e-18	-0.71846	0.099	0.307	2.09322e-13	down
CB1 vs HB1	1 - Erythroid	/	RNF10	9.7204e-18	0.576474	0.84	0.536	2.10719e-13	up
CB1 vs HB1	1 - Erythroid	/	CDCA4	1.12113e-17	-0.207612	0.002	0.062	2.43038e-13	down
CB1 vs HB1	1 - Erythroid	/	HIRIP3	1.14922e-17	-0.220357	0.002	0.062	2.49128e-13	down
CB1 vs HB1	1 - Erythroid	/	CIAO2B	1.20383e-17	-0.482698	0.03	0.167	2.60965e-13	down
CB1 vs HB1	1 - Erythroid	/	UBXN2A	1.2075e-17	-0.203984	0.002	0.062	2.61761e-13	down
CB1 vs HB1	1 - Erythroid	/	DERA	1.2075e-17	-0.217999	0.002	0.062	2.61761e-13	down
CB1 vs HB1	1 - Erythroid	/	SLBP	1.37307e-17	-0.125834	0	0.047	2.97655e-13	down
CB1 vs HB1	1 - Erythroid	/	ARL3	1.37307e-17	-0.118824	0	0.047	2.97655e-13	down
CB1 vs HB1	1 - Erythroid	/	ACAD8	1.37307e-17	-0.122769	0	0.047	2.97655e-13	down
CB1 vs HB1	1 - Erythroid	/	POLE2	1.37307e-17	-0.113532	0	0.047	2.97655e-13	down
CB1 vs HB1	1 - Erythroid	/	TIPIN	1.37307e-17	-0.119517	0	0.047	2.97655e-13	down
CB1 vs HB1	1 - Erythroid	/	CDC45	1.37307e-17	-0.15172	0	0.047	2.97655e-13	down
CB1 vs HB1	1 - Erythroid	/	NDUFV2	1.39265e-17	-0.776446	0.085	0.281	3.01898e-13	down
CB1 vs HB1	1 - Erythroid	/	NDUFA11	1.41973e-17	-0.965649	0.269	0.526	3.07769e-13	down
CB1 vs HB1	1 - Erythroid	/	MLH1	1.5526e-17	-0.415958	0.006	0.083	3.36573e-13	down
CB1 vs HB1	1 - Erythroid	/	MTG1	1.77504e-17	-0.23143	0.006	0.083	3.84793e-13	down
CB1 vs HB1	1 - Erythroid	/	PHF6	1.83247e-17	-0.238976	0.006	0.083	3.97243e-13	down
CB1 vs HB1	1 - Erythroid	/	MRPS27	1.8587e-17	-0.174228	0.001	0.057	4.02929e-13	down
CB1 vs HB1	1 - Erythroid	/	DPM1	1.8587e-17	-0.201786	0.001	0.057	4.02929e-13	down
CB1 vs HB1	1 - Erythroid	/	MRPL52	1.86437e-17	-0.459375	0.025	0.151	4.04158e-13	down
CB1 vs HB1	1 - Erythroid	/	MELK	1.89169e-17	-0.258143	0.001	0.057	4.10081e-13	down
CB1 vs HB1	1 - Erythroid	/	PRELID2	1.9084e-17	-0.154669	0.001	0.057	4.13704e-13	down
CB1 vs HB1	1 - Erythroid	/	RPL7	1.92743e-17	-1.48651	0.286	0.536	4.17829e-13	down
CB1 vs HB1	1 - Erythroid	/	CHEK2	1.94226e-17	-0.231018	0.001	0.057	4.21044e-13	down
CB1 vs HB1	1 - Erythroid	/	POLD1	1.97672e-17	-0.170388	0.001	0.057	4.28513e-13	down
CB1 vs HB1	1 - Erythroid	/	CDCA5	2.04744e-17	-0.154319	0.001	0.057	4.43844e-13	down
CB1 vs HB1	1 - Erythroid	/	MAGOHB	2.04744e-17	-0.18638	0.001	0.057	4.43844e-13	down
CB1 vs HB1	1 - Erythroid	/	RPP21	2.1301e-17	-0.429553	0.007	0.089	4.61762e-13	down
CB1 vs HB1	1 - Erythroid	/	CCDC15	2.15824e-17	-0.132893	0.001	0.057	4.67862e-13	down
CB1 vs HB1	1 - Erythroid	/	RPL8	2.16522e-17	-2.44317	0.518	0.688	4.69377e-13	down
CB1 vs HB1	1 - Erythroid	/	UBXN11	2.20933e-17	-0.197146	0.001	0.052	4.78938e-13	down
CB1 vs HB1	1 - Erythroid	/	ATPAF2	2.23049e-17	-0.166762	0.001	0.052	4.83527e-13	down
CB1 vs HB1	1 - Erythroid	/	FUBP1	2.28534e-17	-0.321207	0.012	0.109	4.95415e-13	down
CB1 vs HB1	1 - Erythroid	/	PRIM2	2.29521e-17	-0.183953	0.001	0.052	4.97556e-13	down
CB1 vs HB1	1 - Erythroid	/	TMEM70	2.31719e-17	-0.165392	0.001	0.052	5.02321e-13	down
CB1 vs HB1	1 - Erythroid	/	FAHD2A	2.33938e-17	-0.119058	0.001	0.052	5.0713e-13	down
CB1 vs HB1	1 - Erythroid	/	ACAD9	2.33938e-17	-0.166168	0.001	0.052	5.0713e-13	down
CB1 vs HB1	1 - Erythroid	/	MDM1	2.33938e-17	-0.127837	0.001	0.052	5.0713e-13	down
CB1 vs HB1	1 - Erythroid	/	KREMEN1	2.36178e-17	-0.190418	0.001	0.052	5.11986e-13	down
CB1 vs HB1	1 - Erythroid	/	URM1	2.39593e-17	-0.359443	0.011	0.104	5.19389e-13	down
CB1 vs HB1	1 - Erythroid	/	APEX1	2.46427e-17	-0.391662	0.017	0.125	5.34203e-13	down
CB1 vs HB1	1 - Erythroid	/	CNRIP1	2.60629e-17	-0.351728	0.004	0.073	5.64991e-13	down
CB1 vs HB1	1 - Erythroid	/	TCF12	2.64377e-17	-0.283666	0.007	0.089	5.73116e-13	down
CB1 vs HB1	1 - Erythroid	/	NAA10	2.73076e-17	-0.633927	0.043	0.193	5.91974e-13	down
CB1 vs HB1	1 - Erythroid	/	FANCD2	2.73858e-17	-0.192311	0.004	0.073	5.93669e-13	down
CB1 vs HB1	1 - Erythroid	/	APIP	2.73858e-17	-0.174008	0.004	0.073	5.93669e-13	down
CB1 vs HB1	1 - Erythroid	/	PIN1	2.75033e-17	-0.499662	0.036	0.177	5.96216e-13	down
CB1 vs HB1	1 - Erythroid	/	DHRS4L2	2.79728e-17	-0.493887	0.004	0.073	6.06394e-13	down
CB1 vs HB1	1 - Erythroid	/	RPL12	2.82008e-17	-2.16922	0.521	0.677	6.11337e-13	down
CB1 vs HB1	1 - Erythroid	/	LRRCC1	2.8371e-17	-0.247444	0.004	0.073	6.15027e-13	down
CB1 vs HB1	1 - Erythroid	/	RFC1	2.94465e-17	-0.249273	0.007	0.089	6.38341e-13	down
CB1 vs HB1	1 - Erythroid	/	SIRT3	3.13712e-17	-0.458027	0.01	0.099	6.80066e-13	down
CB1 vs HB1	1 - Erythroid	/	AHCY	3.15422e-17	-0.323622	0.01	0.099	6.83772e-13	down
CB1 vs HB1	1 - Erythroid	/	POLR2D	3.17648e-17	-0.161154	0.004	0.073	6.88596e-13	down
CB1 vs HB1	1 - Erythroid	/	RPL11	3.26347e-17	-2.37067	0.52	0.698	7.07454e-13	down
CB1 vs HB1	1 - Erythroid	/	GRHPR	3.28985e-17	-0.456769	0.019	0.13	7.13174e-13	down
CB1 vs HB1	1 - Erythroid	/	MRPL11	3.31868e-17	-0.273149	0.007	0.089	7.19424e-13	down
CB1 vs HB1	1 - Erythroid	/	NPM1	3.31971e-17	-1.40681	0.076	0.255	7.19647e-13	down
CB1 vs HB1	1 - Erythroid	/	MT-ND4	3.5892e-17	-0.915192	0.313	0.583	7.78066e-13	down
CB1 vs HB1	1 - Erythroid	/	PLIN2	3.61279e-17	-0.418891	0.01	0.099	7.8318e-13	down
CB1 vs HB1	1 - Erythroid	/	RPS5	3.81501e-17	-2.77637	0.329	0.536	8.27018e-13	down
CB1 vs HB1	1 - Erythroid	/	MGME1	3.8489e-17	-0.562015	0.024	0.146	8.34365e-13	down
CB1 vs HB1	1 - Erythroid	/	MPLKIP	3.92041e-17	-0.360955	0.019	0.13	8.49865e-13	down
CB1 vs HB1	1 - Erythroid	/	POLR2H	3.94016e-17	-0.292938	0.01	0.099	8.54148e-13	down
CB1 vs HB1	1 - Erythroid	/	AHSP	4.05842e-17	-0.729863	0.994	0.969	8.79785e-13	down
CB1 vs HB1	1 - Erythroid	/	RAB13	4.13491e-17	-0.251152	0.008	0.094	8.96366e-13	down
CB1 vs HB1	1 - Erythroid	/	ARMC1	4.13699e-17	-0.283585	0.01	0.099	8.96817e-13	down
CB1 vs HB1	1 - Erythroid	/	SFPQ	4.40851e-17	-0.545737	0.026	0.151	9.55678e-13	down
CB1 vs HB1	1 - Erythroid	/	FERMT3	4.54613e-17	-0.516128	0.017	0.125	9.85511e-13	down
CB1 vs HB1	1 - Erythroid	/	NACA	4.98496e-17	-1.58078	0.603	0.76	1.08064e-12	down
CB1 vs HB1	1 - Erythroid	/	XRCC1	6.16491e-17	-0.219366	0.005	0.078	1.33643e-12	down
CB1 vs HB1	1 - Erythroid	/	INSIG1	6.24591e-17	-0.289596	0.005	0.078	1.35399e-12	down
CB1 vs HB1	1 - Erythroid	/	ANAPC5	6.36444e-17	-0.406571	0.017	0.125	1.37968e-12	down
CB1 vs HB1	1 - Erythroid	/	CAPRIN2	6.45301e-17	-0.246529	0.005	0.078	1.39888e-12	down
CB1 vs HB1	1 - Erythroid	/	GTF3C3	6.88775e-17	-0.276235	0.005	0.078	1.49313e-12	down
CB1 vs HB1	1 - Erythroid	/	SARNP	7.11522e-17	-0.372867	0.024	0.146	1.54244e-12	down
CB1 vs HB1	1 - Erythroid	/	NOL8	7.11582e-17	-0.290659	0.005	0.078	1.54257e-12	down
CB1 vs HB1	1 - Erythroid	/	MVD	7.16232e-17	-0.297964	0.005	0.078	1.55265e-12	down
CB1 vs HB1	1 - Erythroid	/	MRPL44	7.20912e-17	-0.289374	0.005	0.078	1.56279e-12	down
CB1 vs HB1	1 - Erythroid	/	RPS24	7.82117e-17	-2.29256	0.511	0.672	1.69547e-12	down
CB1 vs HB1	1 - Erythroid	/	COX6A1	8.33265e-17	-1.10048	0.269	0.51	1.80635e-12	down
CB1 vs HB1	1 - Erythroid	/	VRK2	8.4197e-17	-0.272683	0.003	0.068	1.82522e-12	down
CB1 vs HB1	1 - Erythroid	/	KATNBL1	8.67036e-17	-0.254874	0.003	0.068	1.87956e-12	down
CB1 vs HB1	1 - Erythroid	/	GLUL	8.72132e-17	0.556753	0.926	0.635	1.89061e-12	up
CB1 vs HB1	1 - Erythroid	/	RMDN1	8.86317e-17	-0.161685	0.003	0.068	1.92136e-12	down
CB1 vs HB1	1 - Erythroid	/	BSCL2	8.86317e-17	-0.135766	0.003	0.068	1.92136e-12	down
CB1 vs HB1	1 - Erythroid	/	CCNF	8.86317e-17	-0.402528	0.003	0.068	1.92136e-12	down
CB1 vs HB1	1 - Erythroid	/	TRAP1	8.86317e-17	-0.197437	0.003	0.068	1.92136e-12	down
CB1 vs HB1	1 - Erythroid	/	CWC22	8.99405e-17	-0.204815	0.003	0.068	1.94973e-12	down
CB1 vs HB1	1 - Erythroid	/	MYBL2	9.06021e-17	-0.220785	0.003	0.068	1.96407e-12	down
CB1 vs HB1	1 - Erythroid	/	WBP11	9.60728e-17	-0.352706	0.017	0.125	2.08267e-12	down
CB1 vs HB1	1 - Erythroid	/	VDAC2	9.81541e-17	-0.573655	0.053	0.214	2.12778e-12	down
CB1 vs HB1	1 - Erythroid	/	OTUD6B-AS1	1.05864e-16	-0.43498	0.012	0.104	2.29492e-12	down
CB1 vs HB1	1 - Erythroid	/	MRPL2	1.32204e-16	-0.272393	0.008	0.089	2.86593e-12	down
CB1 vs HB1	1 - Erythroid	/	DRG2	1.3537e-16	-0.207889	0.006	0.083	2.93455e-12	down
CB1 vs HB1	1 - Erythroid	/	KRIT1	1.42977e-16	-0.253594	0.006	0.083	3.09946e-12	down
CB1 vs HB1	1 - Erythroid	/	HIST1H2BH	1.43303e-16	-0.294781	0.008	0.089	3.10652e-12	down
CB1 vs HB1	1 - Erythroid	/	ATP5PB	1.44018e-16	-0.954964	0.103	0.297	3.12202e-12	down
CB1 vs HB1	1 - Erythroid	/	FARSA	1.44179e-16	-0.284112	0.01	0.099	3.12551e-12	down
CB1 vs HB1	1 - Erythroid	/	GMPR2	1.45605e-16	-0.208451	0.006	0.083	3.15644e-12	down
CB1 vs HB1	1 - Erythroid	/	EWSR1	1.46372e-16	-0.838436	0.083	0.266	3.17304e-12	down
CB1 vs HB1	1 - Erythroid	/	NAA20	1.46492e-16	-0.172223	0.006	0.083	3.17566e-12	down
CB1 vs HB1	1 - Erythroid	/	TSR2	1.48281e-16	-0.209533	0.006	0.083	3.21444e-12	down
CB1 vs HB1	1 - Erythroid	/	RPS8	1.50639e-16	-2.78512	0.562	0.714	3.26555e-12	down
CB1 vs HB1	1 - Erythroid	/	UBE2B	1.52098e-16	0.547777	0.795	0.495	3.29718e-12	up
CB1 vs HB1	1 - Erythroid	/	JPT1	1.55243e-16	-0.58474	0.031	0.161	3.36536e-12	down
CB1 vs HB1	1 - Erythroid	/	MRPL19	1.58031e-16	-0.322248	0.016	0.12	3.42579e-12	down
CB1 vs HB1	1 - Erythroid	/	PSMA3	1.59847e-16	-0.272061	0.008	0.089	3.46516e-12	down
CB1 vs HB1	1 - Erythroid	/	CNIH4	1.61661e-16	-0.447793	0.009	0.094	3.5045e-12	down
CB1 vs HB1	1 - Erythroid	/	ATG5	1.69614e-16	-0.334433	0.01	0.099	3.67689e-12	down
CB1 vs HB1	1 - Erythroid	/	EXOC5	1.74226e-16	-0.240109	0.008	0.089	3.77687e-12	down
CB1 vs HB1	1 - Erythroid	/	SMIM26	1.94099e-16	-0.377655	0.021	0.135	4.20768e-12	down
CB1 vs HB1	1 - Erythroid	/	THOC3	2.03218e-16	-0.443911	0.015	0.115	4.40535e-12	down
CB1 vs HB1	1 - Erythroid	/	RPL41	2.05758e-16	-1.69922	0.379	0.599	4.46043e-12	down
CB1 vs HB1	1 - Erythroid	/	GARS	2.14015e-16	-0.587712	0.038	0.177	4.63942e-12	down
CB1 vs HB1	1 - Erythroid	/	NOP10	2.36339e-16	-0.545757	0.038	0.177	5.12336e-12	down
CB1 vs HB1	1 - Erythroid	/	MRPL58	2.36469e-16	-0.151877	0.003	0.062	5.12617e-12	down
CB1 vs HB1	1 - Erythroid	/	SLC1A5	2.38758e-16	0.747418	0.699	0.391	5.17579e-12	up
CB1 vs HB1	1 - Erythroid	/	EZH2	2.40121e-16	-0.201152	0.003	0.062	5.20534e-12	down
CB1 vs HB1	1 - Erythroid	/	SIGMAR1	2.41968e-16	-0.161008	0.003	0.062	5.24538e-12	down
CB1 vs HB1	1 - Erythroid	/	HAUS4	2.43196e-16	-0.260821	0.005	0.073	5.272e-12	down
CB1 vs HB1	1 - Erythroid	/	RUSC1	2.47593e-16	-0.129925	0.003	0.062	5.36732e-12	down
CB1 vs HB1	1 - Erythroid	/	MRPS10	2.4863e-16	-0.49671	0.02	0.13	5.38979e-12	down
CB1 vs HB1	1 - Erythroid	/	GPR89A	2.49797e-16	-0.332758	0.005	0.073	5.4151e-12	down
CB1 vs HB1	1 - Erythroid	/	CNOT9	2.57256e-16	-0.213236	0.003	0.062	5.57679e-12	down
CB1 vs HB1	1 - Erythroid	/	SPHK1	2.57256e-16	-0.140514	0.003	0.062	5.57679e-12	down
CB1 vs HB1	1 - Erythroid	/	PPP1R7	2.62867e-16	-0.293575	0.021	0.135	5.69843e-12	down
CB1 vs HB1	1 - Erythroid	/	CEP57L1	2.73495e-16	-0.117589	0.003	0.062	5.92882e-12	down
CB1 vs HB1	1 - Erythroid	/	UQCRFS1	2.79448e-16	-0.760891	0.055	0.214	6.05787e-12	down
CB1 vs HB1	1 - Erythroid	/	SDHC	2.90578e-16	-0.319282	0.018	0.125	6.29915e-12	down
CB1 vs HB1	1 - Erythroid	/	RPL6	2.93007e-16	-1.93931	0.526	0.719	6.3518e-12	down
CB1 vs HB1	1 - Erythroid	/	PHF5A	2.98141e-16	-0.264894	0.018	0.125	6.46309e-12	down
CB1 vs HB1	1 - Erythroid	/	PMM1	3.03236e-16	-0.24369	0.005	0.073	6.57354e-12	down
CB1 vs HB1	1 - Erythroid	/	PKN2	3.22013e-16	-0.333816	0.018	0.125	6.98059e-12	down
CB1 vs HB1	1 - Erythroid	/	RPLP0	3.29245e-16	-3.00297	0.472	0.641	7.13736e-12	down
CB1 vs HB1	1 - Erythroid	/	PSMD13	3.64677e-16	-0.396618	0.042	0.188	7.90547e-12	down
CB1 vs HB1	1 - Erythroid	/	MRPL47	4.22089e-16	-0.395386	0.026	0.146	9.15004e-12	down
CB1 vs HB1	1 - Erythroid	/	NUCB2	4.36046e-16	-0.299334	0.014	0.109	9.45261e-12	down
CB1 vs HB1	1 - Erythroid	/	COPB2	4.61156e-16	-0.612163	0.062	0.229	9.99693e-12	down
CB1 vs HB1	1 - Erythroid	/	VDAC1	4.83447e-16	-0.37399	0.006	0.078	1.04802e-11	down
CB1 vs HB1	1 - Erythroid	/	SDHD	4.90899e-16	-0.298341	0.012	0.104	1.06417e-11	down
CB1 vs HB1	1 - Erythroid	/	MT-CO3	5.00031e-16	-1.27483	0.642	0.802	1.08397e-11	down
CB1 vs HB1	1 - Erythroid	/	PEBP1	5.034e-16	-0.408744	0.011	0.099	1.09127e-11	down
CB1 vs HB1	1 - Erythroid	/	SEC22C	5.04741e-16	-0.297375	0.014	0.109	1.09418e-11	down
CB1 vs HB1	1 - Erythroid	/	IDH3B	5.15492e-16	-0.348125	0.012	0.104	1.11748e-11	down
CB1 vs HB1	1 - Erythroid	/	SCD	5.65737e-16	-0.231275	0.002	0.057	1.22641e-11	down
CB1 vs HB1	1 - Erythroid	/	SKP2	5.7496e-16	-0.233875	0.002	0.057	1.2464e-11	down
CB1 vs HB1	1 - Erythroid	/	RHNO1	5.7496e-16	-0.187623	0.002	0.057	1.2464e-11	down
CB1 vs HB1	1 - Erythroid	/	DNPH1	5.75123e-16	-0.349542	0.007	0.083	1.24675e-11	down
CB1 vs HB1	1 - Erythroid	/	MRPL15	5.79627e-16	-0.163109	0.002	0.057	1.25651e-11	down
CB1 vs HB1	1 - Erythroid	/	H1FX	5.84331e-16	-0.227104	0.002	0.057	1.26671e-11	down
CB1 vs HB1	1 - Erythroid	/	AC091057.6	5.89072e-16	-0.277426	0.002	0.057	1.27699e-11	down
CB1 vs HB1	1 - Erythroid	/	GTF2H4	6.03526e-16	-0.160118	0.002	0.057	1.30832e-11	down
CB1 vs HB1	1 - Erythroid	/	ZDHHC4	6.03526e-16	-0.14184	0.002	0.057	1.30832e-11	down
CB1 vs HB1	1 - Erythroid	/	BTBD10	6.08421e-16	-0.145699	0.002	0.057	1.31893e-11	down
CB1 vs HB1	1 - Erythroid	/	ETFB	6.47267e-16	-0.571591	0.035	0.167	1.40315e-11	down
CB1 vs HB1	1 - Erythroid	/	AURKAIP1	6.5797e-16	-0.64296	0.056	0.214	1.42635e-11	down
CB1 vs HB1	1 - Erythroid	/	EMC9	6.58944e-16	-0.24151	0.006	0.078	1.42846e-11	down
CB1 vs HB1	1 - Erythroid	/	UROD	6.59772e-16	-1.07231	0.723	0.839	1.43025e-11	down
CB1 vs HB1	1 - Erythroid	/	POLR2F	7.2152e-16	-0.505605	0.03	0.156	1.56411e-11	down
CB1 vs HB1	1 - Erythroid	/	TARS	7.25405e-16	-0.5344	0.057	0.219	1.57253e-11	down
CB1 vs HB1	1 - Erythroid	/	JUNB	7.5039e-16	-0.543621	0.032	0.161	1.6267e-11	down
CB1 vs HB1	1 - Erythroid	/	TSC22D1	8.269e-16	-0.562967	0.03	0.156	1.79255e-11	down
CB1 vs HB1	1 - Erythroid	/	SYNCRIP	8.36231e-16	-0.288967	0.008	0.089	1.81278e-11	down
CB1 vs HB1	1 - Erythroid	/	MARS	8.39944e-16	-0.294888	0.007	0.083	1.82083e-11	down
CB1 vs HB1	1 - Erythroid	/	NIPSNAP2	8.50395e-16	-0.11115	0	0.042	1.84349e-11	down
CB1 vs HB1	1 - Erythroid	/	PPFIA1	8.50395e-16	-0.201046	0	0.042	1.84349e-11	down
CB1 vs HB1	1 - Erythroid	/	DDX11	8.50395e-16	-0.170391	0	0.042	1.84349e-11	down
CB1 vs HB1	1 - Erythroid	/	GALC	8.50395e-16	-0.138973	0	0.042	1.84349e-11	down
CB1 vs HB1	1 - Erythroid	/	FAM98B	8.50395e-16	-0.124617	0	0.042	1.84349e-11	down
CB1 vs HB1	1 - Erythroid	/	WDR4	8.50395e-16	-0.135725	0	0.042	1.84349e-11	down
CB1 vs HB1	1 - Erythroid	/	EPDR1	8.50395e-16	-0.125874	0	0.042	1.84349e-11	down
CB1 vs HB1	1 - Erythroid	/	LINC01133	8.50395e-16	-0.128356	0	0.042	1.84349e-11	down
CB1 vs HB1	1 - Erythroid	/	SDHAF2	8.51319e-16	-0.3812	0.025	0.141	1.84549e-11	down
CB1 vs HB1	1 - Erythroid	/	MICOS13	8.73667e-16	-0.385007	0.01	0.094	1.89394e-11	down
CB1 vs HB1	1 - Erythroid	/	LARP7	8.73958e-16	-0.289444	0.008	0.089	1.89457e-11	down
CB1 vs HB1	1 - Erythroid	/	LYRM7	8.74532e-16	-0.203831	0.004	0.068	1.89581e-11	down
CB1 vs HB1	1 - Erythroid	/	INTS10	9.16388e-16	-0.200502	0.007	0.083	1.98655e-11	down
CB1 vs HB1	1 - Erythroid	/	PCGF5	9.44684e-16	0.799937	0.608	0.318	2.04789e-11	up
CB1 vs HB1	1 - Erythroid	/	MYCBP	1.01752e-15	-0.242617	0.01	0.094	2.20579e-11	down
CB1 vs HB1	1 - Erythroid	/	LYAR	1.03595e-15	-0.171968	0.001	0.052	2.24573e-11	down
CB1 vs HB1	1 - Erythroid	/	ZWILCH	1.06082e-15	-0.249776	0.004	0.068	2.29965e-11	down
CB1 vs HB1	1 - Erythroid	/	POLD3	1.06318e-15	-0.150061	0.001	0.052	2.30477e-11	down
CB1 vs HB1	1 - Erythroid	/	GINS3	1.07242e-15	-0.139771	0.001	0.052	2.32478e-11	down
CB1 vs HB1	1 - Erythroid	/	NOP53	1.07687e-15	-0.408251	0.017	0.12	2.33444e-11	down
CB1 vs HB1	1 - Erythroid	/	ARHGEF39	1.08173e-15	-0.159446	0.001	0.052	2.34497e-11	down
CB1 vs HB1	1 - Erythroid	/	INTS12	1.09045e-15	-0.1808	0.004	0.068	2.36387e-11	down
CB1 vs HB1	1 - Erythroid	/	MRPL39	1.09045e-15	-0.199932	0.004	0.068	2.36387e-11	down
CB1 vs HB1	1 - Erythroid	/	BRIX1	1.09798e-15	-0.158417	0.004	0.068	2.3802e-11	down
CB1 vs HB1	1 - Erythroid	/	OXCT1	1.10059e-15	-0.160265	0.001	0.052	2.38587e-11	down
CB1 vs HB1	1 - Erythroid	/	C16orf91	1.10059e-15	-0.158189	0.001	0.052	2.38587e-11	down
CB1 vs HB1	1 - Erythroid	/	NR1H2	1.10167e-15	-0.728406	0.085	0.271	2.38821e-11	down
CB1 vs HB1	1 - Erythroid	/	USP48	1.11245e-15	-0.215473	0.01	0.094	2.41157e-11	down
CB1 vs HB1	1 - Erythroid	/	COASY	1.13195e-15	-0.166104	0.008	0.089	2.45384e-11	down
CB1 vs HB1	1 - Erythroid	/	DNAJB11	1.14426e-15	-0.169708	0.004	0.068	2.48053e-11	down
CB1 vs HB1	1 - Erythroid	/	FN3KRP	1.14426e-15	-0.141081	0.004	0.068	2.48053e-11	down
CB1 vs HB1	1 - Erythroid	/	LIN9	1.14919e-15	-0.101703	0.001	0.052	2.49121e-11	down
CB1 vs HB1	1 - Erythroid	/	UNC50	1.14919e-15	-0.106165	0.001	0.052	2.49121e-11	down
CB1 vs HB1	1 - Erythroid	/	CHRAC1	1.16011e-15	-0.172625	0.004	0.068	2.51489e-11	down
CB1 vs HB1	1 - Erythroid	/	DDX10	1.29394e-15	-0.259069	0.001	0.047	2.80499e-11	down
CB1 vs HB1	1 - Erythroid	/	MT-ND4L	1.2961e-15	-1.17569	0.419	0.667	2.80969e-11	down
CB1 vs HB1	1 - Erythroid	/	NCAPH2	1.3311e-15	-0.106071	0.001	0.047	2.88555e-11	down
CB1 vs HB1	1 - Erythroid	/	FANCB	1.3311e-15	-0.126603	0.001	0.047	2.88555e-11	down
CB1 vs HB1	1 - Erythroid	/	CENPA	1.3311e-15	-0.25336	0.001	0.047	2.88555e-11	down
CB1 vs HB1	1 - Erythroid	/	PPP2R1A	1.35012e-15	-0.408224	0.013	0.104	2.92678e-11	down
CB1 vs HB1	1 - Erythroid	/	CHAF1A	1.35645e-15	-0.135338	0.001	0.047	2.94052e-11	down
CB1 vs HB1	1 - Erythroid	/	NUP85	1.36931e-15	-0.183816	0.001	0.047	2.96839e-11	down
CB1 vs HB1	1 - Erythroid	/	NAXD	1.39538e-15	-0.111426	0.001	0.047	3.02491e-11	down
CB1 vs HB1	1 - Erythroid	/	B3GALNT1	1.4086e-15	-0.0888621	0.001	0.047	3.05357e-11	down
CB1 vs HB1	1 - Erythroid	/	NDUFC1	1.4966e-15	-0.798257	0.068	0.234	3.24433e-11	down
CB1 vs HB1	1 - Erythroid	/	SRSF1	1.6014e-15	-0.391573	0.016	0.115	3.47151e-11	down
CB1 vs HB1	1 - Erythroid	/	PSMB5	1.69618e-15	-0.386954	0.026	0.146	3.67698e-11	down
CB1 vs HB1	1 - Erythroid	/	ATP1B3	1.78688e-15	-0.560969	0.016	0.115	3.87359e-11	down
CB1 vs HB1	1 - Erythroid	/	MT-ND5	1.92604e-15	-1.136	0.346	0.604	4.17528e-11	down
CB1 vs HB1	1 - Erythroid	/	NSMCE2	2.12851e-15	-0.241804	0.013	0.104	4.61418e-11	down
CB1 vs HB1	1 - Erythroid	/	DCUN1D5	2.20771e-15	-0.381679	0.01	0.094	4.78588e-11	down
CB1 vs HB1	1 - Erythroid	/	HDAC1	2.21725e-15	-0.410579	0.037	0.172	4.80656e-11	down
CB1 vs HB1	1 - Erythroid	/	UBE2S	2.25144e-15	-0.332406	0.005	0.073	4.88066e-11	down
CB1 vs HB1	1 - Erythroid	/	BCL2L12	2.4138e-15	-0.206447	0.005	0.073	5.23263e-11	down
CB1 vs HB1	1 - Erythroid	/	PDIA6	2.52307e-15	-0.307216	0.005	0.073	5.46951e-11	down
CB1 vs HB1	1 - Erythroid	/	ACTB	2.5238e-15	-0.856878	0.876	0.938	5.47109e-11	down
CB1 vs HB1	1 - Erythroid	/	GNPAT	2.58768e-15	-0.252066	0.005	0.073	5.60957e-11	down
CB1 vs HB1	1 - Erythroid	/	HSPA9	2.66201e-15	-0.485616	0.036	0.167	5.7707e-11	down
CB1 vs HB1	1 - Erythroid	/	SCLT1	2.74122e-15	-0.405464	0.015	0.109	5.94242e-11	down
CB1 vs HB1	1 - Erythroid	/	MTX1	2.9014e-15	-0.193356	0.012	0.099	6.28966e-11	down
CB1 vs HB1	1 - Erythroid	/	IMMP1L	3.02169e-15	-0.28137	0.006	0.078	6.55041e-11	down
CB1 vs HB1	1 - Erythroid	/	SFT2D1	3.06154e-15	-0.33803	0.012	0.099	6.63681e-11	down
CB1 vs HB1	1 - Erythroid	/	DDX21	3.09583e-15	-0.24673	0.016	0.115	6.71113e-11	down
CB1 vs HB1	1 - Erythroid	/	VDAC3	3.17595e-15	-0.699268	0.072	0.24	6.88482e-11	down
CB1 vs HB1	1 - Erythroid	/	MCTS1	3.18589e-15	-0.187067	0.003	0.062	6.90638e-11	down
CB1 vs HB1	1 - Erythroid	/	MALSU1	3.27839e-15	-0.187358	0.003	0.062	7.10689e-11	down
CB1 vs HB1	1 - Erythroid	/	ITGB1BP1	3.39774e-15	-0.273585	0.003	0.062	7.36562e-11	down
CB1 vs HB1	1 - Erythroid	/	2024-03-08	3.47236e-15	0.610377	0.724	0.432	7.52739e-11	up
CB1 vs HB1	1 - Erythroid	/	VAMP3	3.49629e-15	-0.191502	0.003	0.062	7.57926e-11	down
CB1 vs HB1	1 - Erythroid	/	REEP4	3.51885e-15	-0.404802	0.018	0.12	7.62815e-11	down
CB1 vs HB1	1 - Erythroid	/	CCNC	3.53054e-15	-0.308628	0.008	0.083	7.65351e-11	down
CB1 vs HB1	1 - Erythroid	/	NUP62	3.54472e-15	-0.244899	0.006	0.078	7.68424e-11	down
CB1 vs HB1	1 - Erythroid	/	GOT1	3.5631e-15	-0.3492	0.018	0.12	7.72409e-11	down
CB1 vs HB1	1 - Erythroid	/	U2AF1	3.67253e-15	-0.338724	0.006	0.078	7.96131e-11	down
CB1 vs HB1	1 - Erythroid	/	OLA1	3.72525e-15	-0.391776	0.022	0.13	8.07561e-11	down
CB1 vs HB1	1 - Erythroid	/	CNPPD1	3.77936e-15	0.743976	0.651	0.365	8.1929e-11	up
CB1 vs HB1	1 - Erythroid	/	C1orf131	3.83642e-15	-0.263037	0.003	0.062	8.31659e-11	down
CB1 vs HB1	1 - Erythroid	/	PAFAH1B3	3.98541e-15	-0.276384	0.009	0.089	8.63958e-11	down
CB1 vs HB1	1 - Erythroid	/	NIPA2	3.98868e-15	-0.239342	0.006	0.078	8.64665e-11	down
CB1 vs HB1	1 - Erythroid	/	TMCO1	4.01399e-15	-0.369206	0.008	0.083	8.70154e-11	down
CB1 vs HB1	1 - Erythroid	/	TYMSOS	4.03285e-15	-0.155106	0.003	0.062	8.74241e-11	down
CB1 vs HB1	1 - Erythroid	/	C11orf74	4.10448e-15	-0.249122	0.008	0.083	8.8977e-11	down
CB1 vs HB1	1 - Erythroid	/	TRAPPC4	4.43094e-15	-0.20215	0.009	0.089	9.60539e-11	down
CB1 vs HB1	1 - Erythroid	/	TRNAU1AP	4.98691e-15	-0.219958	0.008	0.083	1.08106e-10	down
CB1 vs HB1	1 - Erythroid	/	NAPRT	4.98691e-15	-0.174292	0.008	0.083	1.08106e-10	down
CB1 vs HB1	1 - Erythroid	/	SF3A2	5.13849e-15	-0.433093	0.032	0.156	1.11392e-10	down
CB1 vs HB1	1 - Erythroid	/	NGDN	5.24249e-15	-0.174634	0.008	0.083	1.13647e-10	down
CB1 vs HB1	1 - Erythroid	/	UBC	5.27814e-15	-1.1369	0.189	0.406	1.14419e-10	down
CB1 vs HB1	1 - Erythroid	/	MT-CO2	5.52687e-15	-1.09923	0.669	0.823	1.19811e-10	down
CB1 vs HB1	1 - Erythroid	/	ENSA	5.58118e-15	-0.678278	0.109	0.302	1.20989e-10	down
CB1 vs HB1	1 - Erythroid	/	CHD4	5.63457e-15	-0.191843	0.008	0.083	1.22146e-10	down
CB1 vs HB1	1 - Erythroid	/	KRAS	5.83186e-15	-0.368325	0.014	0.104	1.26423e-10	down
CB1 vs HB1	1 - Erythroid	/	GPS1	5.90238e-15	-0.403191	0.034	0.161	1.27952e-10	down
CB1 vs HB1	1 - Erythroid	/	PTBP1	6.26768e-15	-0.447224	0.026	0.141	1.35871e-10	down
CB1 vs HB1	1 - Erythroid	/	FBXO9	6.47811e-15	0.559945	0.791	0.531	1.40432e-10	up
CB1 vs HB1	1 - Erythroid	/	POP4	6.64735e-15	-0.295097	0.014	0.104	1.44101e-10	down
CB1 vs HB1	1 - Erythroid	/	PNP	6.80531e-15	0.685628	0.862	0.594	1.47525e-10	up
CB1 vs HB1	1 - Erythroid	/	SYNGR2	7.18754e-15	-0.299923	0.03	0.151	1.55811e-10	down
CB1 vs HB1	1 - Erythroid	/	LUC7L2	7.26984e-15	-0.634501	0.052	0.198	1.57596e-10	down
CB1 vs HB1	1 - Erythroid	/	MDH2	7.78215e-15	-0.501836	0.049	0.193	1.68702e-10	down
CB1 vs HB1	1 - Erythroid	/	INTS11	8.17836e-15	-0.399093	0.012	0.099	1.77291e-10	down
CB1 vs HB1	1 - Erythroid	/	PTMS	8.60183e-15	-0.932546	0.045	0.182	1.8647e-10	down
CB1 vs HB1	1 - Erythroid	/	CHAC2	8.61119e-15	-0.416629	0.016	0.109	1.86673e-10	down
CB1 vs HB1	1 - Erythroid	/	R3HDM4	8.89836e-15	0.618303	0.603	0.312	1.92899e-10	up
CB1 vs HB1	1 - Erythroid	/	ABCE1	9.31446e-15	-0.213236	0.005	0.068	2.01919e-10	down
CB1 vs HB1	1 - Erythroid	/	COQ4	9.37514e-15	-0.164435	0.005	0.068	2.03234e-10	down
CB1 vs HB1	1 - Erythroid	/	MRPS2	9.37514e-15	-0.23146	0.005	0.068	2.03234e-10	down
CB1 vs HB1	1 - Erythroid	/	C19orf25	9.43622e-15	-0.255205	0.005	0.068	2.04558e-10	down
CB1 vs HB1	1 - Erythroid	/	THYN1	9.74749e-15	-0.212202	0.005	0.068	2.11306e-10	down
CB1 vs HB1	1 - Erythroid	/	CEP78	9.86549e-15	-0.260546	0.003	0.057	2.13864e-10	down
CB1 vs HB1	1 - Erythroid	/	ELP5	1.01651e-14	-0.172738	0.003	0.057	2.20359e-10	down
CB1 vs HB1	1 - Erythroid	/	KATNAL1	1.03335e-14	-0.145366	0.005	0.068	2.24009e-10	down
CB1 vs HB1	1 - Erythroid	/	ARL1	1.04736e-14	-0.205379	0.003	0.057	2.27048e-10	down
CB1 vs HB1	1 - Erythroid	/	C12orf65	1.05364e-14	-0.20664	0.005	0.068	2.28408e-10	down
CB1 vs HB1	1 - Erythroid	/	RAB4A	1.05522e-14	-0.153861	0.003	0.057	2.28751e-10	down
CB1 vs HB1	1 - Erythroid	/	CASP8AP2	1.06049e-14	-0.157341	0.005	0.068	2.29893e-10	down
CB1 vs HB1	1 - Erythroid	/	ZNF511	1.10359e-14	-0.228549	0.003	0.057	2.39237e-10	down
CB1 vs HB1	1 - Erythroid	/	KHSRP	1.10359e-14	-0.194791	0.003	0.057	2.39237e-10	down
CB1 vs HB1	1 - Erythroid	/	IFI27L1	1.11187e-14	-0.162258	0.003	0.057	2.4103e-10	down
CB1 vs HB1	1 - Erythroid	/	CIRBP	1.11864e-14	-0.725689	0.151	0.359	2.42498e-10	down
CB1 vs HB1	1 - Erythroid	/	CPSF3	1.1202e-14	-0.133518	0.003	0.057	2.42837e-10	down
CB1 vs HB1	1 - Erythroid	/	SGF29	1.12859e-14	-0.191323	0.003	0.057	2.44656e-10	down
CB1 vs HB1	1 - Erythroid	/	NCLN	1.12859e-14	-0.183615	0.003	0.057	2.44656e-10	down
CB1 vs HB1	1 - Erythroid	/	FTSJ3	1.13705e-14	-0.131402	0.003	0.057	2.46489e-10	down
CB1 vs HB1	1 - Erythroid	/	ERI2	1.15415e-14	-0.157625	0.003	0.057	2.50196e-10	down
CB1 vs HB1	1 - Erythroid	/	CCDC28B	1.16113e-14	-0.175711	0.005	0.068	2.5171e-10	down
CB1 vs HB1	1 - Erythroid	/	EXOSC1	1.18389e-14	-0.139466	0.005	0.068	2.56643e-10	down
CB1 vs HB1	1 - Erythroid	/	ICAM4	1.21044e-14	-0.56299	0.035	0.161	2.624e-10	down
CB1 vs HB1	1 - Erythroid	/	NSMCE1	1.21408e-14	-0.345768	0.011	0.094	2.63188e-10	down
CB1 vs HB1	1 - Erythroid	/	ADI1	1.28772e-14	-0.294795	0.011	0.094	2.79152e-10	down
CB1 vs HB1	1 - Erythroid	/	RBM27	1.29723e-14	-0.438415	0.01	0.089	2.81213e-10	down
CB1 vs HB1	1 - Erythroid	/	TMOD3	1.38289e-14	-0.323999	0.023	0.13	2.99782e-10	down
CB1 vs HB1	1 - Erythroid	/	DNAJA4	1.38743e-14	-0.859494	0.139	0.349	3.00767e-10	down
CB1 vs HB1	1 - Erythroid	/	RSL24D1	1.49588e-14	-0.550767	0.05	0.193	3.24277e-10	down
CB1 vs HB1	1 - Erythroid	/	HSPH1	1.51432e-14	-0.437622	0.017	0.115	3.28274e-10	down
CB1 vs HB1	1 - Erythroid	/	TIMM22	1.52558e-14	-0.232691	0.006	0.073	3.30715e-10	down
CB1 vs HB1	1 - Erythroid	/	POLR2C	1.52807e-14	-0.26112	0.01	0.089	3.31254e-10	down
CB1 vs HB1	1 - Erythroid	/	MAGOH	1.60281e-14	-0.249884	0.016	0.109	3.47457e-10	down
CB1 vs HB1	1 - Erythroid	/	HNRNPAB	1.74112e-14	-0.223907	0.006	0.073	3.77439e-10	down
CB1 vs HB1	1 - Erythroid	/	TIMM9	1.74112e-14	-0.245339	0.006	0.073	3.77439e-10	down
CB1 vs HB1	1 - Erythroid	/	FMC1	1.75184e-14	-0.269024	0.007	0.078	3.79764e-10	down
CB1 vs HB1	1 - Erythroid	/	FAR1	1.95117e-14	-0.1715	0.006	0.073	4.22974e-10	down
CB1 vs HB1	1 - Erythroid	/	MRPS7	1.99594e-14	-0.412791	0.023	0.13	4.3268e-10	down
CB1 vs HB1	1 - Erythroid	/	TIMMDC1	2.11613e-14	-0.442398	0.021	0.125	4.58734e-10	down
CB1 vs HB1	1 - Erythroid	/	DGCR6L	2.12209e-14	-0.242171	0.007	0.078	4.60026e-10	down
CB1 vs HB1	1 - Erythroid	/	TIPRL	2.20737e-14	-0.244271	0.007	0.078	4.78513e-10	down
CB1 vs HB1	1 - Erythroid	/	DDT	2.2556e-14	-0.363418	0.029	0.146	4.88969e-10	down
CB1 vs HB1	1 - Erythroid	/	CAPZA1	2.2996e-14	-0.368946	0.013	0.099	4.98507e-10	down
CB1 vs HB1	1 - Erythroid	/	ALDH9A1	2.30896e-14	-0.182447	0.007	0.078	5.00537e-10	down
CB1 vs HB1	1 - Erythroid	/	MFAP1	2.4562e-14	-0.245689	0.007	0.078	5.32456e-10	down
CB1 vs HB1	1 - Erythroid	/	TMC6	2.512e-14	-0.200083	0.007	0.078	5.44552e-10	down
CB1 vs HB1	1 - Erythroid	/	MBD4	2.52615e-14	-0.175308	0.007	0.078	5.47618e-10	down
CB1 vs HB1	1 - Erythroid	/	DPH6	2.57392e-14	-0.152644	0.002	0.052	5.57975e-10	down
CB1 vs HB1	1 - Erythroid	/	GTF2F1	2.60099e-14	-0.389304	0.016	0.109	5.63842e-10	down
CB1 vs HB1	1 - Erythroid	/	SUPV3L1	2.61495e-14	-0.164867	0.002	0.052	5.66868e-10	down
CB1 vs HB1	1 - Erythroid	/	GLRX2	2.72035e-14	-0.15726	0.002	0.052	5.89717e-10	down
CB1 vs HB1	1 - Erythroid	/	CPVL	2.78558e-14	-0.163145	0.002	0.052	6.03859e-10	down
CB1 vs HB1	1 - Erythroid	/	C4orf33	2.82993e-14	-0.178787	0.002	0.052	6.13471e-10	down
CB1 vs HB1	1 - Erythroid	/	SARS2	2.82993e-14	-0.114455	0.002	0.052	6.13471e-10	down
CB1 vs HB1	1 - Erythroid	/	THG1L	2.87496e-14	-0.152893	0.002	0.052	6.23234e-10	down
CB1 vs HB1	1 - Erythroid	/	PRMT3	2.94384e-14	-0.185807	0.002	0.052	6.38166e-10	down
CB1 vs HB1	1 - Erythroid	/	DCTN5	2.94384e-14	-0.126132	0.002	0.052	6.38166e-10	down
CB1 vs HB1	1 - Erythroid	/	RPN2	3.04254e-14	-0.352769	0.016	0.109	6.59563e-10	down
CB1 vs HB1	1 - Erythroid	/	DARS2	3.13555e-14	-0.125036	0.002	0.052	6.79725e-10	down
CB1 vs HB1	1 - Erythroid	/	MT-CO1	3.22394e-14	-0.975413	0.925	0.927	6.98886e-10	down
CB1 vs HB1	1 - Erythroid	/	CCNI	3.31828e-14	0.573004	0.776	0.526	7.19336e-10	up
CB1 vs HB1	1 - Erythroid	/	DPP3	3.43035e-14	-0.187134	0.004	0.062	7.43631e-10	down
CB1 vs HB1	1 - Erythroid	/	SF3B6	3.43335e-14	-0.731413	0.103	0.281	7.44281e-10	down
CB1 vs HB1	1 - Erythroid	/	SELENOH	3.52187e-14	-0.540294	0.028	0.141	7.63471e-10	down
CB1 vs HB1	1 - Erythroid	/	BSG	3.67029e-14	0.483911	0.984	0.891	7.95645e-10	up
CB1 vs HB1	1 - Erythroid	/	ACSL3	3.76732e-14	-0.169425	0.004	0.062	8.1668e-10	down
CB1 vs HB1	1 - Erythroid	/	THUMPD3	3.84366e-14	-0.183203	0.004	0.062	8.33228e-10	down
CB1 vs HB1	1 - Erythroid	/	RPL5	3.90498e-14	-2.2568	0.299	0.484	8.46521e-10	down
CB1 vs HB1	1 - Erythroid	/	FAM110A	3.92151e-14	-0.257824	0.004	0.062	8.50105e-10	down
CB1 vs HB1	1 - Erythroid	/	HNRNPDL	3.96662e-14	-0.690285	0.039	0.167	8.59884e-10	down
CB1 vs HB1	1 - Erythroid	/	MRPL55	4.27119e-14	-0.4516	0.022	0.125	9.25909e-10	down
CB1 vs HB1	1 - Erythroid	/	RAB1A	4.33637e-14	-0.31443	0.012	0.094	9.40038e-10	down
CB1 vs HB1	1 - Erythroid	/	SSX2IP	4.49334e-14	-0.314025	0.012	0.094	9.74066e-10	down
CB1 vs HB1	1 - Erythroid	/	SRA1	4.65355e-14	-0.312552	0.018	0.115	1.0088e-09	down
CB1 vs HB1	1 - Erythroid	/	HSD17B4	4.8062e-14	-0.339184	0.018	0.115	1.04189e-09	down
CB1 vs HB1	1 - Erythroid	/	LYRM2	5.058e-14	-0.233016	0.012	0.094	1.09647e-09	down
CB1 vs HB1	1 - Erythroid	/	RBMX	5.18393e-14	-0.620603	0.049	0.188	1.12377e-09	down
CB1 vs HB1	1 - Erythroid	/	TMED9	5.22824e-14	-0.284359	0.012	0.094	1.13338e-09	down
CB1 vs HB1	1 - Erythroid	/	PPIL3	5.28137e-14	-0.10362	0	0.036	1.1449e-09	down
CB1 vs HB1	1 - Erythroid	/	CHCHD4	5.28137e-14	-0.108707	0	0.036	1.1449e-09	down
CB1 vs HB1	1 - Erythroid	/	POLE	5.28137e-14	-0.0763647	0	0.036	1.1449e-09	down
CB1 vs HB1	1 - Erythroid	/	TRIP4	5.28137e-14	-0.151157	0	0.036	1.1449e-09	down
CB1 vs HB1	1 - Erythroid	/	MED9	5.28137e-14	-0.095983	0	0.036	1.1449e-09	down
CB1 vs HB1	1 - Erythroid	/	CDC25A	5.28137e-14	-0.0803664	0	0.036	1.1449e-09	down
CB1 vs HB1	1 - Erythroid	/	BRCA2	5.321e-14	-0.173163	0.001	0.047	1.15349e-09	down
CB1 vs HB1	1 - Erythroid	/	CDC25C	5.45822e-14	-0.314183	0.001	0.047	1.18323e-09	down
CB1 vs HB1	1 - Erythroid	/	RCCD1	5.59891e-14	-0.179862	0.001	0.047	1.21373e-09	down
CB1 vs HB1	1 - Erythroid	/	PRMT6	5.69469e-14	-0.125386	0.001	0.047	1.23449e-09	down
CB1 vs HB1	1 - Erythroid	/	MRM2	5.69469e-14	-0.138124	0.001	0.047	1.23449e-09	down
CB1 vs HB1	1 - Erythroid	/	TEX30	5.74317e-14	-0.179264	0.001	0.047	1.245e-09	down
CB1 vs HB1	1 - Erythroid	/	MMAB	5.79207e-14	-0.12539	0.001	0.047	1.2556e-09	down
CB1 vs HB1	1 - Erythroid	/	TELO2	5.84137e-14	-0.126978	0.001	0.047	1.26629e-09	down
CB1 vs HB1	1 - Erythroid	/	SLC35A4	5.89108e-14	-0.188405	0.001	0.047	1.27707e-09	down
CB1 vs HB1	1 - Erythroid	/	TCF19	5.89108e-14	-0.15111	0.001	0.047	1.27707e-09	down
CB1 vs HB1	1 - Erythroid	/	PSMF1	5.93309e-14	0.548133	0.833	0.609	1.28618e-09	up
CB1 vs HB1	1 - Erythroid	/	BORA	5.94121e-14	-0.205679	0.001	0.047	1.28794e-09	down
CB1 vs HB1	1 - Erythroid	/	MXD3	5.99176e-14	-0.249194	0.001	0.047	1.29889e-09	down
CB1 vs HB1	1 - Erythroid	/	OGFOD3	5.99176e-14	-0.137457	0.001	0.047	1.29889e-09	down
CB1 vs HB1	1 - Erythroid	/	RAD51C	6.04274e-14	-0.125414	0.001	0.047	1.30994e-09	down
CB1 vs HB1	1 - Erythroid	/	EIF4A3	6.04274e-14	-0.0928428	0.001	0.047	1.30994e-09	down
CB1 vs HB1	1 - Erythroid	/	RWDD1	6.45416e-14	-0.374585	0.043	0.177	1.39913e-09	down
CB1 vs HB1	1 - Erythroid	/	OSBPL8	6.86584e-14	-0.201779	0.01	0.089	1.48838e-09	down
CB1 vs HB1	1 - Erythroid	/	CCDC82	7.31968e-14	-0.161228	0.005	0.068	1.58676e-09	down
CB1 vs HB1	1 - Erythroid	/	ADSL	7.4163e-14	-0.351442	0.017	0.109	1.60771e-09	down
CB1 vs HB1	1 - Erythroid	/	NIF3L1	7.54738e-14	-0.212841	0.005	0.068	1.63612e-09	down
CB1 vs HB1	1 - Erythroid	/	NDUFA3	7.63406e-14	-0.683018	0.079	0.245	1.65491e-09	down
CB1 vs HB1	1 - Erythroid	/	EIF1AX	7.63631e-14	-0.331734	0.028	0.141	1.6554e-09	down
CB1 vs HB1	1 - Erythroid	/	NPC2	7.71889e-14	-0.262665	0.009	0.083	1.6733e-09	down
CB1 vs HB1	1 - Erythroid	/	DESI2	7.73676e-14	-0.186987	0.001	0.042	1.67717e-09	down
CB1 vs HB1	1 - Erythroid	/	ZNF530	7.73676e-14	-0.123399	0.001	0.042	1.67717e-09	down
CB1 vs HB1	1 - Erythroid	/	PSMC1	7.86907e-14	-0.621687	0.05	0.188	1.70586e-09	down
CB1 vs HB1	1 - Erythroid	/	RHOBTB3	7.8823e-14	-0.131131	0.001	0.042	1.70873e-09	down
CB1 vs HB1	1 - Erythroid	/	PPP2R1B	7.88354e-14	-0.356765	0.014	0.099	1.70899e-09	down
CB1 vs HB1	1 - Erythroid	/	CCDC86	7.95608e-14	-0.0918153	0.001	0.042	1.72472e-09	down
CB1 vs HB1	1 - Erythroid	/	NDC1	8.03054e-14	-0.124188	0.001	0.042	1.74086e-09	down
CB1 vs HB1	1 - Erythroid	/	RNASEH1	8.07311e-14	-0.109508	0.005	0.068	1.75009e-09	down
CB1 vs HB1	1 - Erythroid	/	ZGRF1	8.10568e-14	-0.158766	0.001	0.042	1.75715e-09	down
CB1 vs HB1	1 - Erythroid	/	MTFR1	8.10568e-14	-0.132964	0.001	0.042	1.75715e-09	down
CB1 vs HB1	1 - Erythroid	/	PTPMT1	8.10568e-14	-0.101491	0.001	0.042	1.75715e-09	down
CB1 vs HB1	1 - Erythroid	/	MRPL49	8.10568e-14	-0.145739	0.001	0.042	1.75715e-09	down
CB1 vs HB1	1 - Erythroid	/	SKA3	8.10568e-14	-0.200996	0.001	0.042	1.75715e-09	down
CB1 vs HB1	1 - Erythroid	/	PCGF6	8.18151e-14	-0.101158	0.001	0.042	1.77359e-09	down
CB1 vs HB1	1 - Erythroid	/	PARP2	8.25804e-14	-0.110732	0.001	0.042	1.79018e-09	down
CB1 vs HB1	1 - Erythroid	/	UBL4A	8.25804e-14	-0.113077	0.001	0.042	1.79018e-09	down
CB1 vs HB1	1 - Erythroid	/	POLQ	8.25804e-14	-0.111679	0.001	0.042	1.79018e-09	down
CB1 vs HB1	1 - Erythroid	/	METAP1	8.68573e-14	-0.237316	0.009	0.083	1.88289e-09	down
CB1 vs HB1	1 - Erythroid	/	SMNDC1	8.73423e-14	-0.359759	0.014	0.099	1.89341e-09	down
CB1 vs HB1	1 - Erythroid	/	PRPF6	9.0106e-14	-0.292674	0.014	0.099	1.95332e-09	down
CB1 vs HB1	1 - Erythroid	/	ZNF22	9.0845e-14	-0.249196	0.008	0.078	1.96934e-09	down
CB1 vs HB1	1 - Erythroid	/	CHMP4A	9.13166e-14	-0.384071	0.014	0.099	1.97956e-09	down
CB1 vs HB1	1 - Erythroid	/	RECQL	9.53621e-14	-0.441881	0.008	0.078	2.06726e-09	down
CB1 vs HB1	1 - Erythroid	/	ATG4B	9.84955e-14	-0.225217	0.008	0.078	2.13519e-09	down
CB1 vs HB1	1 - Erythroid	/	ABHD14B	1.0478e-13	-0.243007	0.017	0.109	2.27142e-09	down
CB1 vs HB1	1 - Erythroid	/	PDHB	1.05636e-13	-0.193801	0.008	0.078	2.28997e-09	down
CB1 vs HB1	1 - Erythroid	/	KDELR2	1.05735e-13	-0.183933	0.014	0.099	2.29212e-09	down
CB1 vs HB1	1 - Erythroid	/	UBE2N	1.12507e-13	-0.251078	0.014	0.099	2.43893e-09	down
CB1 vs HB1	1 - Erythroid	/	RBM25	1.13184e-13	-0.507529	0.039	0.167	2.45359e-09	down
CB1 vs HB1	1 - Erythroid	/	PPID	1.1367e-13	-0.151206	0.006	0.073	2.46414e-09	down
CB1 vs HB1	1 - Erythroid	/	CDKN2AIP	1.14972e-13	-0.149454	0.006	0.073	2.49236e-09	down
CB1 vs HB1	1 - Erythroid	/	TMEM18	1.16995e-13	-0.215087	0.008	0.078	2.53621e-09	down
CB1 vs HB1	1 - Erythroid	/	RPS3A	1.17551e-13	-2.55188	0.472	0.604	2.54828e-09	down
CB1 vs HB1	1 - Erythroid	/	COMMD1	1.18452e-13	-0.338576	0.025	0.13	2.56781e-09	down
CB1 vs HB1	1 - Erythroid	/	SESN3	1.20387e-13	0.715354	0.516	0.26	2.60976e-09	up
CB1 vs HB1	1 - Erythroid	/	MT-ND2	1.21799e-13	-0.822088	0.226	0.469	2.64036e-09	down
CB1 vs HB1	1 - Erythroid	/	IWS1	1.34153e-13	-0.161036	0.003	0.057	2.90816e-09	down
CB1 vs HB1	1 - Erythroid	/	STT3A	1.35086e-13	-0.288748	0.003	0.057	2.9284e-09	down
CB1 vs HB1	1 - Erythroid	/	MTX2	1.37927e-13	-0.181904	0.003	0.057	2.98998e-09	down
CB1 vs HB1	1 - Erythroid	/	METTL21A	1.38887e-13	-0.362547	0.003	0.057	3.01079e-09	down
CB1 vs HB1	1 - Erythroid	/	EEF1A1	1.40979e-13	-2.46897	0.786	0.807	3.05615e-09	down
CB1 vs HB1	1 - Erythroid	/	NAE1	1.41806e-13	-0.209918	0.003	0.057	3.07406e-09	down
CB1 vs HB1	1 - Erythroid	/	MATR3.1	1.42729e-13	-0.434842	0.033	0.151	3.09408e-09	down
CB1 vs HB1	1 - Erythroid	/	ATAD5	1.42792e-13	-0.255365	0.003	0.057	3.09544e-09	down
CB1 vs HB1	1 - Erythroid	/	HMGN5	1.46286e-13	-0.245753	0.012	0.094	3.17119e-09	down
CB1 vs HB1	1 - Erythroid	/	ACAT1	1.47825e-13	-0.114636	0.003	0.057	3.20456e-09	down
CB1 vs HB1	1 - Erythroid	/	TSPAN14	1.71993e-13	-0.349906	0.023	0.125	3.72847e-09	down
CB1 vs HB1	1 - Erythroid	/	TPT1	1.7363e-13	-1.39916	0.817	0.875	3.76396e-09	down
CB1 vs HB1	1 - Erythroid	/	GLRX3	1.86841e-13	-0.411677	0.031	0.146	4.05035e-09	down
CB1 vs HB1	1 - Erythroid	/	MRPL33	1.88124e-13	-0.256978	0.012	0.094	4.07815e-09	down
CB1 vs HB1	1 - Erythroid	/	BZW1	1.90105e-13	-0.405713	0.033	0.151	4.12109e-09	down
CB1 vs HB1	1 - Erythroid	/	LAMTOR4	1.99901e-13	-0.445801	0.033	0.151	4.33345e-09	down
CB1 vs HB1	1 - Erythroid	/	SSNA1	2.18269e-13	-0.548308	0.046	0.177	4.73163e-09	down
CB1 vs HB1	1 - Erythroid	/	HSD17B10	2.23775e-13	-0.334205	0.021	0.12	4.85099e-09	down
CB1 vs HB1	1 - Erythroid	/	SLC25A37	2.34014e-13	0.496714	0.997	0.964	5.07296e-09	up
CB1 vs HB1	1 - Erythroid	/	DPY30	2.73042e-13	-0.332265	0.014	0.099	5.91901e-09	down
CB1 vs HB1	1 - Erythroid	/	CTSE	3.08445e-13	-0.491903	0.036	0.156	6.68647e-09	down
CB1 vs HB1	1 - Erythroid	/	NDUFB3	3.08741e-13	-0.549116	0.079	0.24	6.69289e-09	down
CB1 vs HB1	1 - Erythroid	/	VAPB	3.15003e-13	-0.228182	0.005	0.062	6.82863e-09	down
CB1 vs HB1	1 - Erythroid	/	PDIA3	3.25556e-13	-0.253602	0.023	0.125	7.0574e-09	down
CB1 vs HB1	1 - Erythroid	/	HSBP1	3.27151e-13	-0.294912	0.014	0.099	7.09199e-09	down
CB1 vs HB1	1 - Erythroid	/	KLHL7	3.29148e-13	-0.169588	0.005	0.062	7.13527e-09	down
CB1 vs HB1	1 - Erythroid	/	SPPL2A	3.37509e-13	-0.167625	0.005	0.062	7.31652e-09	down
CB1 vs HB1	1 - Erythroid	/	GTF2A2	3.39419e-13	-0.693879	0.131	0.323	7.35793e-09	down
CB1 vs HB1	1 - Erythroid	/	SF3B4	3.6235e-13	-0.232754	0.023	0.125	7.85503e-09	down
CB1 vs HB1	1 - Erythroid	/	AASDHPPT	3.62619e-13	-0.16624	0.011	0.089	7.86085e-09	down
CB1 vs HB1	1 - Erythroid	/	ICE2	3.63863e-13	-0.116837	0.005	0.062	7.88783e-09	down
CB1 vs HB1	1 - Erythroid	/	EIF2S3	3.84926e-13	-0.48929	0.053	0.193	8.34443e-09	down
CB1 vs HB1	1 - Erythroid	/	UBE2J2	3.96505e-13	-0.298573	0.008	0.078	8.59543e-09	down
CB1 vs HB1	1 - Erythroid	/	EIF3K	4.09043e-13	-1.02522	0.279	0.49	8.86723e-09	down
CB1 vs HB1	1 - Erythroid	/	EIF2S2	4.09702e-13	-0.830744	0.152	0.349	8.88153e-09	down
CB1 vs HB1	1 - Erythroid	/	MORC3	4.14833e-13	-0.430495	0.034	0.151	8.99275e-09	down
CB1 vs HB1	1 - Erythroid	/	HPF1	4.1489e-13	-0.282505	0.003	0.052	8.99398e-09	down
CB1 vs HB1	1 - Erythroid	/	TTF1	4.19664e-13	-0.276488	0.008	0.078	9.09749e-09	down
CB1 vs HB1	1 - Erythroid	/	TWISTNB	4.30236e-13	-0.170958	0.003	0.052	9.32665e-09	down
CB1 vs HB1	1 - Erythroid	/	DDX54	4.31571e-13	-0.163215	0.01	0.083	9.35561e-09	down
CB1 vs HB1	1 - Erythroid	/	AHCTF1	4.33371e-13	-0.154942	0.003	0.052	9.39462e-09	down
CB1 vs HB1	1 - Erythroid	/	SNX12	4.42913e-13	-0.172893	0.003	0.052	9.60147e-09	down
CB1 vs HB1	1 - Erythroid	/	PES1	4.44804e-13	-0.222631	0.013	0.094	9.64246e-09	down
CB1 vs HB1	1 - Erythroid	/	PHF19	4.46139e-13	-0.265571	0.003	0.052	9.6714e-09	down
CB1 vs HB1	1 - Erythroid	/	NAXE	4.52661e-13	-0.133628	0.003	0.052	9.81278e-09	down
CB1 vs HB1	1 - Erythroid	/	TACC1	4.55957e-13	-0.118711	0.003	0.052	9.88423e-09	down
CB1 vs HB1	1 - Erythroid	/	SMG9	4.55957e-13	-0.134645	0.003	0.052	9.88423e-09	down
CB1 vs HB1	1 - Erythroid	/	UTP11	4.65986e-13	-0.137059	0.003	0.052	1.01016e-08	down
CB1 vs HB1	1 - Erythroid	/	NABP2	4.69132e-13	-0.279603	0.007	0.073	1.01698e-08	down
CB1 vs HB1	1 - Erythroid	/	TBP	4.76232e-13	-0.163735	0.003	0.052	1.03238e-08	down
CB1 vs HB1	1 - Erythroid	/	EIF2S1	4.78246e-13	-0.360577	0.044	0.172	1.03674e-08	down
CB1 vs HB1	1 - Erythroid	/	CUL2	4.79456e-13	-0.300853	0.007	0.073	1.03936e-08	down
CB1 vs HB1	1 - Erythroid	/	TTLL12	4.79696e-13	-0.108776	0.003	0.052	1.03989e-08	down
CB1 vs HB1	1 - Erythroid	/	PLEKHJ1	4.8229e-13	-0.272006	0.008	0.078	1.04551e-08	down
CB1 vs HB1	1 - Erythroid	/	MRPL21	4.83562e-13	-0.396273	0.02	0.115	1.04827e-08	down
CB1 vs HB1	1 - Erythroid	/	APH1A	4.87278e-13	-0.222626	0.008	0.078	1.05632e-08	down
CB1 vs HB1	1 - Erythroid	/	BAD	4.92317e-13	-0.276567	0.008	0.078	1.06724e-08	down
CB1 vs HB1	1 - Erythroid	/	MESD	4.93803e-13	-0.12681	0.003	0.052	1.07047e-08	down
CB1 vs HB1	1 - Erythroid	/	EIF6	4.97406e-13	-0.209432	0.008	0.078	1.07828e-08	down
CB1 vs HB1	1 - Erythroid	/	SNHG1	5.03487e-13	-0.148534	0.006	0.068	1.09146e-08	down
CB1 vs HB1	1 - Erythroid	/	PRDX4	5.0641e-13	-0.140104	0.006	0.068	1.0978e-08	down
CB1 vs HB1	1 - Erythroid	/	DSTN	5.10286e-13	-0.247561	0.013	0.094	1.1062e-08	down
CB1 vs HB1	1 - Erythroid	/	GTF3C6	5.38375e-13	-0.334104	0.036	0.156	1.16709e-08	down
CB1 vs HB1	1 - Erythroid	/	NELFCD	5.45281e-13	-0.224242	0.013	0.094	1.18206e-08	down
CB1 vs HB1	1 - Erythroid	/	PRPF31	5.55217e-13	-0.162201	0.007	0.073	1.2036e-08	down
CB1 vs HB1	1 - Erythroid	/	FN3K	5.59824e-13	-0.357605	0.026	0.13	1.21359e-08	down
CB1 vs HB1	1 - Erythroid	/	DDX50	5.86162e-13	-0.198858	0.007	0.073	1.27068e-08	down
CB1 vs HB1	1 - Erythroid	/	BLVRB	6.2191e-13	-0.430588	0.992	0.969	1.34818e-08	down
CB1 vs HB1	1 - Erythroid	/	NDUFS4	7.03069e-13	-0.34098	0.018	0.109	1.52411e-08	down
CB1 vs HB1	1 - Erythroid	/	MAPK1IP1L	7.31934e-13	-0.358079	0.037	0.156	1.58669e-08	down
CB1 vs HB1	1 - Erythroid	/	ZRANB2	7.55487e-13	-0.161838	0.013	0.094	1.63775e-08	down
CB1 vs HB1	1 - Erythroid	/	SET	7.72237e-13	-0.355181	0.012	0.089	1.67405e-08	down
CB1 vs HB1	1 - Erythroid	/	DHX9	7.73184e-13	-0.367641	0.022	0.12	1.67611e-08	down
CB1 vs HB1	1 - Erythroid	/	NPRL3	9.22082e-13	0.716737	0.492	0.234	1.99889e-08	up
CB1 vs HB1	1 - Erythroid	/	ATF6B	1.08327e-12	-0.362981	0.017	0.104	2.34832e-08	down
CB1 vs HB1	1 - Erythroid	/	PPHLN1	1.08681e-12	-0.409951	0.021	0.115	2.35598e-08	down
CB1 vs HB1	1 - Erythroid	/	HNRNPA0	1.08851e-12	-0.418171	0.023	0.12	2.35967e-08	down
CB1 vs HB1	1 - Erythroid	/	PRPF40A	1.17588e-12	-0.403572	0.026	0.13	2.54907e-08	down
CB1 vs HB1	1 - Erythroid	/	TMX4	1.20455e-12	-0.336883	0.004	0.057	2.61122e-08	down
CB1 vs HB1	1 - Erythroid	/	FAM83D	1.24224e-12	-0.343915	0.019	0.109	2.69292e-08	down
CB1 vs HB1	1 - Erythroid	/	SRSF4	1.24296e-12	-0.283981	0.01	0.083	2.69449e-08	down
CB1 vs HB1	1 - Erythroid	/	TTK	1.25222e-12	-0.243056	0.004	0.057	2.71457e-08	down
CB1 vs HB1	1 - Erythroid	/	NNT	1.26035e-12	-0.216802	0.004	0.057	2.73218e-08	down
CB1 vs HB1	1 - Erythroid	/	TMEM50B	1.27675e-12	-0.155352	0.004	0.057	2.76774e-08	down
CB1 vs HB1	1 - Erythroid	/	PFKL	1.27675e-12	-0.177724	0.004	0.057	2.76774e-08	down
CB1 vs HB1	1 - Erythroid	/	SEC61B	1.2811e-12	-0.690109	0.107	0.276	2.77718e-08	down
CB1 vs HB1	1 - Erythroid	/	SLC25A11	1.28503e-12	-0.160846	0.004	0.057	2.78569e-08	down
CB1 vs HB1	1 - Erythroid	/	GRWD1	1.2879e-12	-0.187957	0.002	0.047	2.79192e-08	down
CB1 vs HB1	1 - Erythroid	/	GIHCG	1.29337e-12	-0.272205	0.004	0.057	2.80376e-08	down
CB1 vs HB1	1 - Erythroid	/	TMEM109	1.31019e-12	-0.243476	0.004	0.057	2.84023e-08	down
CB1 vs HB1	1 - Erythroid	/	MRPL50	1.31868e-12	-0.211438	0.004	0.057	2.85864e-08	down
CB1 vs HB1	1 - Erythroid	/	DLD	1.31909e-12	-0.291076	0.025	0.125	2.85952e-08	down
CB1 vs HB1	1 - Erythroid	/	ZBED5	1.33832e-12	-0.218213	0.002	0.047	2.90121e-08	down
CB1 vs HB1	1 - Erythroid	/	MRPL46	1.34449e-12	-0.180512	0.004	0.057	2.91458e-08	down
CB1 vs HB1	1 - Erythroid	/	HIST2H2AA4	1.34863e-12	-0.158872	0.002	0.047	2.92356e-08	down
CB1 vs HB1	1 - Erythroid	/	METTL17	1.34863e-12	-0.108086	0.002	0.047	2.92356e-08	down
CB1 vs HB1	1 - Erythroid	/	PNPT1	1.36197e-12	-0.117239	0.004	0.057	2.95247e-08	down
CB1 vs HB1	1 - Erythroid	/	GPN3	1.36197e-12	-0.156962	0.004	0.057	2.95247e-08	down
CB1 vs HB1	1 - Erythroid	/	CBX1	1.36949e-12	-0.114312	0.002	0.047	2.96878e-08	down
CB1 vs HB1	1 - Erythroid	/	PPARA	1.36949e-12	-0.138761	0.002	0.047	2.96878e-08	down
CB1 vs HB1	1 - Erythroid	/	FAM111A	1.3886e-12	-0.16572	0.004	0.057	3.01021e-08	down
CB1 vs HB1	1 - Erythroid	/	PPP5C	1.3886e-12	-0.111122	0.004	0.057	3.01021e-08	down
CB1 vs HB1	1 - Erythroid	/	ATL3	1.39067e-12	-0.134649	0.002	0.047	3.01469e-08	down
CB1 vs HB1	1 - Erythroid	/	DLAT	1.39067e-12	-0.155577	0.002	0.047	3.01469e-08	down
CB1 vs HB1	1 - Erythroid	/	CPOX	1.39379e-12	-0.753599	0.133	0.323	3.02145e-08	down
CB1 vs HB1	1 - Erythroid	/	GFM2	1.39759e-12	-0.199945	0.004	0.057	3.0297e-08	down
CB1 vs HB1	1 - Erythroid	/	C22orf39	1.4245e-12	-0.275112	0.019	0.109	3.08803e-08	down
CB1 vs HB1	1 - Erythroid	/	ERI3	1.44341e-12	-0.0936966	0.004	0.057	3.12903e-08	down
CB1 vs HB1	1 - Erythroid	/	SRPRA	1.48053e-12	-0.264946	0.01	0.083	3.20949e-08	down
CB1 vs HB1	1 - Erythroid	/	POLE3	1.482e-12	-0.263871	0.014	0.094	3.21267e-08	down
CB1 vs HB1	1 - Erythroid	/	G3BP1	1.48801e-12	-0.302298	0.045	0.172	3.22571e-08	down
CB1 vs HB1	1 - Erythroid	/	NFYB	1.55948e-12	-0.125106	0.004	0.057	3.38065e-08	down
CB1 vs HB1	1 - Erythroid	/	SMS	1.71336e-12	-0.2447	0.009	0.078	3.71422e-08	down
CB1 vs HB1	1 - Erythroid	/	WDR18	1.75099e-12	-0.237011	0.014	0.094	3.7958e-08	down
CB1 vs HB1	1 - Erythroid	/	SLC11A2	1.82923e-12	-0.333064	0.019	0.109	3.9654e-08	down
CB1 vs HB1	1 - Erythroid	/	SNHG3	1.90044e-12	-0.252451	0.009	0.078	4.11976e-08	down
CB1 vs HB1	1 - Erythroid	/	RBM14	1.98723e-12	-0.246259	0.008	0.073	4.30792e-08	down
CB1 vs HB1	1 - Erythroid	/	RPS19BP1	2.02588e-12	-0.586861	0.043	0.167	4.3917e-08	down
CB1 vs HB1	1 - Erythroid	/	TMEM230	2.04749e-12	-0.63014	0.127	0.307	4.43855e-08	down
CB1 vs HB1	1 - Erythroid	/	SUZ12	2.11046e-12	-0.173983	0.005	0.062	4.57506e-08	down
CB1 vs HB1	1 - Erythroid	/	KATNA1	2.13417e-12	-0.445125	0.016	0.099	4.62646e-08	down
CB1 vs HB1	1 - Erythroid	/	TBC1D7	2.1866e-12	-0.122201	0.005	0.062	4.74012e-08	down
CB1 vs HB1	1 - Erythroid	/	USB1	2.19955e-12	-0.170469	0.005	0.062	4.76819e-08	down
CB1 vs HB1	1 - Erythroid	/	MOB4	2.19965e-12	-0.277317	0.021	0.115	4.7684e-08	down
CB1 vs HB1	1 - Erythroid	/	R3HDM1	2.22568e-12	-0.163898	0.005	0.062	4.82482e-08	down
CB1 vs HB1	1 - Erythroid	/	GCAT	2.26261e-12	-0.159626	0.008	0.073	4.90488e-08	down
CB1 vs HB1	1 - Erythroid	/	NDUFA4	2.27142e-12	-0.974554	0.326	0.526	4.92398e-08	down
CB1 vs HB1	1 - Erythroid	/	MRPS33	2.30589e-12	-0.146102	0.005	0.062	4.99871e-08	down
CB1 vs HB1	1 - Erythroid	/	MRPL32	2.33325e-12	-0.141293	0.005	0.062	5.05803e-08	down
CB1 vs HB1	1 - Erythroid	/	NBN	2.3749e-12	-0.160873	0.005	0.062	5.1483e-08	down
CB1 vs HB1	1 - Erythroid	/	PSMC4	2.43247e-12	-0.453307	0.065	0.208	5.27311e-08	down
CB1 vs HB1	1 - Erythroid	/	KIN	2.44545e-12	-0.212302	0.008	0.073	5.30125e-08	down
CB1 vs HB1	1 - Erythroid	/	SSH2	2.45685e-12	-0.277201	0.012	0.089	5.32596e-08	down
CB1 vs HB1	1 - Erythroid	/	PMF1	2.47236e-12	-0.157488	0.006	0.068	5.35957e-08	down
CB1 vs HB1	1 - Erythroid	/	NIPSNAP3A	2.5019e-12	-0.263025	0.033	0.146	5.42362e-08	down
CB1 vs HB1	1 - Erythroid	/	RPS18	2.58815e-12	-2.57596	0.428	0.589	5.61059e-08	down
CB1 vs HB1	1 - Erythroid	/	MPST	2.65344e-12	-0.267298	0.017	0.104	5.75213e-08	down
CB1 vs HB1	1 - Erythroid	/	CUTA	2.72625e-12	-0.318299	0.017	0.104	5.90996e-08	down
CB1 vs HB1	1 - Erythroid	/	RNF114	2.7474e-12	-0.343599	0.017	0.104	5.95582e-08	down
CB1 vs HB1	1 - Erythroid	/	UBE2D2	2.8334e-12	-0.530012	0.095	0.26	6.14224e-08	down
CB1 vs HB1	1 - Erythroid	/	NMI	2.83614e-12	-0.157665	0.006	0.068	6.14819e-08	down
CB1 vs HB1	1 - Erythroid	/	SRP54	2.91729e-12	-0.238417	0.012	0.089	6.32411e-08	down
CB1 vs HB1	1 - Erythroid	/	GFER	2.91988e-12	-0.112192	0.001	0.042	6.32973e-08	down
CB1 vs HB1	1 - Erythroid	/	WARS2	2.94416e-12	-0.14195	0.001	0.042	6.38235e-08	down
CB1 vs HB1	1 - Erythroid	/	MTERF3	2.94416e-12	-0.0977786	0.001	0.042	6.38235e-08	down
CB1 vs HB1	1 - Erythroid	/	TERF1	3.01819e-12	-0.146281	0.001	0.042	6.54282e-08	down
CB1 vs HB1	1 - Erythroid	/	LDB1	3.01819e-12	-0.190924	0.001	0.042	6.54282e-08	down
CB1 vs HB1	1 - Erythroid	/	UTP4	3.01819e-12	-0.121095	0.001	0.042	6.54282e-08	down
CB1 vs HB1	1 - Erythroid	/	HYI	3.04326e-12	-0.182349	0.001	0.042	6.59719e-08	down
CB1 vs HB1	1 - Erythroid	/	PVT1	3.04326e-12	-0.120142	0.001	0.042	6.59719e-08	down
CB1 vs HB1	1 - Erythroid	/	GON7	3.04326e-12	-0.0745596	0.001	0.042	6.59719e-08	down
CB1 vs HB1	1 - Erythroid	/	SLC39A1	3.06855e-12	-0.145449	0.001	0.042	6.65199e-08	down
CB1 vs HB1	1 - Erythroid	/	TRMT2A	3.06855e-12	-0.096346	0.001	0.042	6.65199e-08	down
CB1 vs HB1	1 - Erythroid	/	BAP1	3.09403e-12	-0.179593	0.001	0.042	6.70725e-08	down
CB1 vs HB1	1 - Erythroid	/	SAR1A	3.12099e-12	-0.33122	0.021	0.115	6.76568e-08	down
CB1 vs HB1	1 - Erythroid	/	COX7B	3.13555e-12	-0.860751	0.32	0.521	6.79724e-08	down
CB1 vs HB1	1 - Erythroid	/	PTK2	3.14564e-12	-0.123388	0.001	0.042	6.81911e-08	down
CB1 vs HB1	1 - Erythroid	/	LRRC40	3.19808e-12	-0.0771866	0.001	0.042	6.9328e-08	down
CB1 vs HB1	1 - Erythroid	/	VANGL1	3.2964e-12	-0.0944995	0	0.031	7.14594e-08	down
CB1 vs HB1	1 - Erythroid	/	UCK2	3.2964e-12	-0.0599236	0	0.031	7.14594e-08	down
CB1 vs HB1	1 - Erythroid	/	NME7	3.2964e-12	-0.140653	0	0.031	7.14594e-08	down
CB1 vs HB1	1 - Erythroid	/	FANCL	3.2964e-12	-0.0591063	0	0.031	7.14594e-08	down
CB1 vs HB1	1 - Erythroid	/	PPAT	3.2964e-12	-0.100209	0	0.031	7.14594e-08	down
CB1 vs HB1	1 - Erythroid	/	LMNB1	3.2964e-12	-0.090492	0	0.031	7.14594e-08	down
CB1 vs HB1	1 - Erythroid	/	HCG11	3.2964e-12	-0.139399	0	0.031	7.14594e-08	down
CB1 vs HB1	1 - Erythroid	/	GPALPP1	3.2964e-12	-0.0629468	0	0.031	7.14594e-08	down
CB1 vs HB1	1 - Erythroid	/	TRMT5	3.2964e-12	-0.148655	0	0.031	7.14594e-08	down
CB1 vs HB1	1 - Erythroid	/	CSTF2	3.2964e-12	-0.0839469	0	0.031	7.14594e-08	down
CB1 vs HB1	1 - Erythroid	/	HES6	3.2964e-12	-0.114167	0	0.031	7.14594e-08	down
CB1 vs HB1	1 - Erythroid	/	ARHGAP23	3.2964e-12	-0.171264	0	0.031	7.14594e-08	down
CB1 vs HB1	1 - Erythroid	/	MCRS1	4.02708e-12	-0.317972	0.032	0.141	8.7299e-08	down
CB1 vs HB1	1 - Erythroid	/	H3F3A	4.04864e-12	-0.818767	0.84	0.906	8.77664e-08	down
CB1 vs HB1	1 - Erythroid	/	YTHDF2	4.04873e-12	-0.291544	0.011	0.083	8.77683e-08	down
CB1 vs HB1	1 - Erythroid	/	PRKAG1	4.23752e-12	-0.274404	0.011	0.083	9.18609e-08	down
CB1 vs HB1	1 - Erythroid	/	ZNF207	4.40732e-12	-0.436041	0.059	0.198	9.55419e-08	down
CB1 vs HB1	1 - Erythroid	/	SREK1	4.41479e-12	-0.248601	0.011	0.083	9.57038e-08	down
CB1 vs HB1	1 - Erythroid	/	C1orf35	4.53925e-12	-0.121196	0.001	0.036	9.84019e-08	down
CB1 vs HB1	1 - Erythroid	/	CBX6	4.53925e-12	-0.171907	0.001	0.036	9.84019e-08	down
CB1 vs HB1	1 - Erythroid	/	TMEM14A	4.58108e-12	-0.0831453	0.001	0.036	9.93086e-08	down
CB1 vs HB1	1 - Erythroid	/	C12orf4	4.62328e-12	-0.167514	0.001	0.036	1.00224e-07	down
CB1 vs HB1	1 - Erythroid	/	AFMID	4.62328e-12	-0.112068	0.001	0.036	1.00224e-07	down
CB1 vs HB1	1 - Erythroid	/	PGRMC2	4.66587e-12	-0.144959	0.001	0.036	1.01147e-07	down
CB1 vs HB1	1 - Erythroid	/	IFT22	4.66587e-12	-0.159958	0.001	0.036	1.01147e-07	down
CB1 vs HB1	1 - Erythroid	/	PRDX6	4.6738e-12	-0.695038	0.51	0.698	1.01319e-07	down
CB1 vs HB1	1 - Erythroid	/	LRRC42	4.70884e-12	-0.105689	0.001	0.036	1.02078e-07	down
CB1 vs HB1	1 - Erythroid	/	SLFN13	4.70884e-12	-0.10823	0.001	0.036	1.02078e-07	down
CB1 vs HB1	1 - Erythroid	/	WDR11	4.72591e-12	-0.246733	0.003	0.052	1.02448e-07	down
CB1 vs HB1	1 - Erythroid	/	AQP3	4.74602e-12	-0.563036	0.026	0.125	1.02884e-07	down
CB1 vs HB1	1 - Erythroid	/	TRUB2	4.7522e-12	-0.108906	0.001	0.036	1.03018e-07	down
CB1 vs HB1	1 - Erythroid	/	IL15RA	4.7522e-12	-0.0980829	0.001	0.036	1.03018e-07	down
CB1 vs HB1	1 - Erythroid	/	POLA2	4.7522e-12	-0.104243	0.001	0.036	1.03018e-07	down
CB1 vs HB1	1 - Erythroid	/	CHMP6	4.7522e-12	-0.0633156	0.001	0.036	1.03018e-07	down
CB1 vs HB1	1 - Erythroid	/	ZNF675	4.7522e-12	-0.107373	0.001	0.036	1.03018e-07	down
CB1 vs HB1	1 - Erythroid	/	HSPA14	4.79595e-12	-0.0873134	0.001	0.036	1.03967e-07	down
CB1 vs HB1	1 - Erythroid	/	MT-ND3	4.88137e-12	-0.928116	0.198	0.411	1.05818e-07	down
CB1 vs HB1	1 - Erythroid	/	ELP3	5.0198e-12	-0.178484	0.003	0.052	1.08819e-07	down
CB1 vs HB1	1 - Erythroid	/	HMGXB4	5.1561e-12	-0.149335	0.003	0.052	1.11774e-07	down
CB1 vs HB1	1 - Erythroid	/	TUBGCP3	5.19074e-12	-0.108696	0.003	0.052	1.12525e-07	down
CB1 vs HB1	1 - Erythroid	/	IKZF1	5.22977e-12	-0.450725	0.026	0.125	1.13371e-07	down
CB1 vs HB1	1 - Erythroid	/	STARD3	5.2607e-12	-0.134075	0.003	0.052	1.14042e-07	down
CB1 vs HB1	1 - Erythroid	/	TCTN3	5.33159e-12	-0.110347	0.003	0.052	1.15578e-07	down
CB1 vs HB1	1 - Erythroid	/	LMF2	5.43968e-12	-0.139304	0.003	0.052	1.17921e-07	down
CB1 vs HB1	1 - Erythroid	/	ARF5	5.548e-12	-0.581816	0.063	0.198	1.2027e-07	down
CB1 vs HB1	1 - Erythroid	/	PSMB7	5.55187e-12	-0.65893	0.1	0.26	1.20353e-07	down
CB1 vs HB1	1 - Erythroid	/	SRRM2	5.79017e-12	-0.501184	0.026	0.125	1.25519e-07	down
CB1 vs HB1	1 - Erythroid	/	AP2S1	6.1051e-12	-0.746714	0.464	0.677	1.32346e-07	down
CB1 vs HB1	1 - Erythroid	/	SMARCE1	6.18239e-12	-0.318411	0.03	0.135	1.34022e-07	down
CB1 vs HB1	1 - Erythroid	/	SNHG5	6.35069e-12	-0.246379	0.01	0.078	1.3767e-07	down
CB1 vs HB1	1 - Erythroid	/	RPL36AL	6.44172e-12	-0.82198	0.275	0.495	1.39644e-07	down
CB1 vs HB1	1 - Erythroid	/	COMMD3	6.69637e-12	-0.313552	0.016	0.099	1.45164e-07	down
CB1 vs HB1	1 - Erythroid	/	TMEM69	6.72181e-12	-0.223572	0.01	0.078	1.45715e-07	down
CB1 vs HB1	1 - Erythroid	/	PSMD7	7.03642e-12	-0.468971	0.098	0.266	1.52536e-07	down
CB1 vs HB1	1 - Erythroid	/	LAMTOR2	7.16224e-12	-0.307307	0.024	0.12	1.55263e-07	down
CB1 vs HB1	1 - Erythroid	/	RPA2	7.24987e-12	-0.166028	0.01	0.078	1.57163e-07	down
CB1 vs HB1	1 - Erythroid	/	ENO1	7.29734e-12	-0.42573	0.03	0.135	1.58192e-07	down
CB1 vs HB1	1 - Erythroid	/	COA4	7.62652e-12	-0.259317	0.008	0.073	1.65328e-07	down
CB1 vs HB1	1 - Erythroid	/	NDUFB5	7.76402e-12	-0.331547	0.02	0.109	1.68309e-07	down
CB1 vs HB1	1 - Erythroid	/	TANK	7.78979e-12	0.601849	0.587	0.354	1.68867e-07	up
CB1 vs HB1	1 - Erythroid	/	PDXDC1	8.10302e-12	-0.272024	0.005	0.057	1.75657e-07	down
CB1 vs HB1	1 - Erythroid	/	C5orf51	8.31253e-12	-0.174853	0.01	0.078	1.80199e-07	down
CB1 vs HB1	1 - Erythroid	/	DNAJC11	8.50652e-12	-0.19027	0.008	0.073	1.84404e-07	down
CB1 vs HB1	1 - Erythroid	/	ECHS1	8.85058e-12	-0.209857	0.008	0.073	1.91863e-07	down
CB1 vs HB1	1 - Erythroid	/	FAM118A	8.93871e-12	-0.289457	0.008	0.073	1.93773e-07	down
CB1 vs HB1	1 - Erythroid	/	ATP6V0C	9.09607e-12	0.480038	0.87	0.656	1.97185e-07	up
CB1 vs HB1	1 - Erythroid	/	CNOT3	9.20174e-12	-0.147232	0.005	0.057	1.99475e-07	down
CB1 vs HB1	1 - Erythroid	/	SZRD1	9.38146e-12	-0.439032	0.061	0.198	2.03371e-07	down
CB1 vs HB1	1 - Erythroid	/	SMC5	9.42697e-12	-0.262566	0.005	0.057	2.04358e-07	down
CB1 vs HB1	1 - Erythroid	/	MYL4	9.60968e-12	-0.645546	0.738	0.818	2.08319e-07	down
CB1 vs HB1	1 - Erythroid	/	HTATSF1	9.65761e-12	-0.236392	0.005	0.057	2.09358e-07	down
CB1 vs HB1	1 - Erythroid	/	RPS6KB2	9.66427e-12	-0.41431	0.063	0.203	2.09502e-07	down
CB1 vs HB1	1 - Erythroid	/	C1orf174	9.71613e-12	-0.19228	0.005	0.057	2.10626e-07	down
CB1 vs HB1	1 - Erythroid	/	MRPL30	9.71613e-12	-0.147053	0.005	0.057	2.10626e-07	down
CB1 vs HB1	1 - Erythroid	/	MYDGF	9.76151e-12	-0.288876	0.007	0.068	2.1161e-07	down
CB1 vs HB1	1 - Erythroid	/	FCGR2A	9.77499e-12	-0.174204	0.005	0.057	2.11902e-07	down
CB1 vs HB1	1 - Erythroid	/	ELP4	9.83421e-12	-0.224715	0.005	0.057	2.13186e-07	down
CB1 vs HB1	1 - Erythroid	/	PDRG1	9.95369e-12	-0.158887	0.005	0.057	2.15776e-07	down
CB1 vs HB1	1 - Erythroid	/	PPDPF	9.99825e-12	-0.944786	0.39	0.557	2.16742e-07	down
CB1 vs HB1	1 - Erythroid	/	MED8	1.00862e-11	-0.353328	0.026	0.125	2.18649e-07	down
CB1 vs HB1	1 - Erythroid	/	EXOSC9	1.02863e-11	-0.212548	0.007	0.068	2.22987e-07	down
CB1 vs HB1	1 - Erythroid	/	ZCCHC10	1.03832e-11	-0.127307	0.005	0.057	2.25087e-07	down
CB1 vs HB1	1 - Erythroid	/	MPHOSPH8	1.04312e-11	-0.258467	0.024	0.12	2.26127e-07	down
CB1 vs HB1	1 - Erythroid	/	NMD3	1.0489e-11	-0.290796	0.006	0.062	2.27381e-07	down
CB1 vs HB1	1 - Erythroid	/	ZDHHC12	1.06367e-11	-0.111253	0.005	0.057	2.30583e-07	down
CB1 vs HB1	1 - Erythroid	/	PRPF8	1.06484e-11	-0.357585	0.036	0.146	2.30835e-07	down
CB1 vs HB1	1 - Erythroid	/	PUF60	1.07142e-11	-0.383977	0.021	0.109	2.32262e-07	down
CB1 vs HB1	1 - Erythroid	/	TRAPPC1	1.08421e-11	-0.758915	0.076	0.219	2.35035e-07	down
CB1 vs HB1	1 - Erythroid	/	ATP5PF	1.097e-11	-0.733059	0.136	0.307	2.37807e-07	down
CB1 vs HB1	1 - Erythroid	/	ORMDL1	1.10554e-11	-0.130274	0.008	0.073	2.3966e-07	down
CB1 vs HB1	1 - Erythroid	/	TNPO3	1.11621e-11	-0.104599	0.005	0.057	2.41972e-07	down
CB1 vs HB1	1 - Erythroid	/	PTCD3	1.20323e-11	-0.169342	0.007	0.068	2.60836e-07	down
CB1 vs HB1	1 - Erythroid	/	KLHL18	1.2306e-11	-0.332004	0.019	0.104	2.66768e-07	down
CB1 vs HB1	1 - Erythroid	/	NOA1	1.23656e-11	-0.149173	0.006	0.062	2.68061e-07	down
CB1 vs HB1	1 - Erythroid	/	HAUS2	1.25041e-11	-0.168334	0.006	0.062	2.71063e-07	down
CB1 vs HB1	1 - Erythroid	/	RNF8	1.25739e-11	-0.318925	0.006	0.062	2.72577e-07	down
CB1 vs HB1	1 - Erythroid	/	UBAP2L	1.30002e-11	-0.250935	0.012	0.083	2.81819e-07	down
CB1 vs HB1	1 - Erythroid	/	DRAP1	1.34062e-11	-0.64838	0.065	0.203	2.90619e-07	down
CB1 vs HB1	1 - Erythroid	/	DCAF7	1.38435e-11	-0.404947	0.045	0.167	3.001e-07	down
CB1 vs HB1	1 - Erythroid	/	DHRS3	1.77125e-11	-0.23906	0.003	0.047	3.83972e-07	down
CB1 vs HB1	1 - Erythroid	/	IDH3A	1.79626e-11	-0.158019	0.003	0.047	3.89393e-07	down
CB1 vs HB1	1 - Erythroid	/	TUBE1	1.80889e-11	-0.187706	0.003	0.047	3.92131e-07	down
CB1 vs HB1	1 - Erythroid	/	SPECC1L	1.80889e-11	-0.137116	0.003	0.047	3.92131e-07	down
CB1 vs HB1	1 - Erythroid	/	RAD51	1.82161e-11	-0.121492	0.003	0.047	3.94888e-07	down
CB1 vs HB1	1 - Erythroid	/	COMMD2	1.83442e-11	-0.153644	0.003	0.047	3.97665e-07	down
CB1 vs HB1	1 - Erythroid	/	RAD1	1.84731e-11	-0.216745	0.003	0.047	4.0046e-07	down
CB1 vs HB1	1 - Erythroid	/	ABHD2	1.84731e-11	-0.138495	0.003	0.047	4.0046e-07	down
CB1 vs HB1	1 - Erythroid	/	NFATC2IP	1.84731e-11	-0.116339	0.003	0.047	4.0046e-07	down
CB1 vs HB1	1 - Erythroid	/	B9D1	1.8603e-11	-0.203671	0.003	0.047	4.03275e-07	down
CB1 vs HB1	1 - Erythroid	/	MTCH1	1.8711e-11	-0.299268	0.021	0.109	4.05617e-07	down
CB1 vs HB1	1 - Erythroid	/	INTS14	1.87337e-11	-0.146591	0.003	0.047	4.06109e-07	down
CB1 vs HB1	1 - Erythroid	/	RPS14	1.87359e-11	-2.09912	0.614	0.714	4.06157e-07	down
CB1 vs HB1	1 - Erythroid	/	MPV17	1.91313e-11	-0.153823	0.003	0.047	4.14728e-07	down
CB1 vs HB1	1 - Erythroid	/	HSD17B8	1.9401e-11	-0.0831695	0.003	0.047	4.20574e-07	down
CB1 vs HB1	1 - Erythroid	/	DCPS	1.9401e-11	-0.0941653	0.003	0.047	4.20574e-07	down
CB1 vs HB1	1 - Erythroid	/	OIP5	1.95372e-11	-0.132379	0.003	0.047	4.23527e-07	down
CB1 vs HB1	1 - Erythroid	/	RPL13	1.99771e-11	-2.46888	0.671	0.755	4.33063e-07	down
CB1 vs HB1	1 - Erythroid	/	SERP1	2.0785e-11	-0.459628	0.07	0.214	4.50578e-07	down
CB1 vs HB1	1 - Erythroid	/	CD82	2.11824e-11	-0.234329	0.01	0.078	4.59193e-07	down
CB1 vs HB1	1 - Erythroid	/	PRMT1	2.2332e-11	-0.199382	0.014	0.089	4.84114e-07	down
CB1 vs HB1	1 - Erythroid	/	VCAN	2.24714e-11	-0.250612	0.01	0.078	4.87134e-07	down
CB1 vs HB1	1 - Erythroid	/	TDG	2.28284e-11	-0.537022	0.037	0.146	4.94873e-07	down
CB1 vs HB1	1 - Erythroid	/	UBAC2	2.32114e-11	-0.306582	0.025	0.12	5.03178e-07	down
CB1 vs HB1	1 - Erythroid	/	PDZD11	2.37291e-11	-0.194498	0.01	0.078	5.14399e-07	down
CB1 vs HB1	1 - Erythroid	/	PDAP1	2.41261e-11	-0.679924	0.098	0.255	5.23006e-07	down
CB1 vs HB1	1 - Erythroid	/	DNAJC15	2.47613e-11	-0.558163	0.037	0.146	5.36775e-07	down
CB1 vs HB1	1 - Erythroid	/	MLST8	2.50316e-11	-0.279781	0.016	0.094	5.42635e-07	down
CB1 vs HB1	1 - Erythroid	/	WDR61	2.52025e-11	-0.267914	0.021	0.109	5.46339e-07	down
CB1 vs HB1	1 - Erythroid	/	UBXN1	2.65479e-11	-0.614344	0.155	0.339	5.75505e-07	down
CB1 vs HB1	1 - Erythroid	/	EIF4E2	2.86485e-11	-0.512426	0.044	0.161	6.21042e-07	down
CB1 vs HB1	1 - Erythroid	/	TMEM9	2.88251e-11	-0.363178	0.032	0.135	6.2487e-07	down
CB1 vs HB1	1 - Erythroid	/	MAZ	2.90474e-11	-0.396774	0.009	0.073	6.29689e-07	down
CB1 vs HB1	1 - Erythroid	/	MRPS36	2.94246e-11	-0.3293	0.032	0.135	6.37866e-07	down
CB1 vs HB1	1 - Erythroid	/	GPS2	2.97347e-11	-0.423522	0.054	0.182	6.44588e-07	down
CB1 vs HB1	1 - Erythroid	/	LAGE3	3.04591e-11	-0.304376	0.009	0.073	6.60293e-07	down
CB1 vs HB1	1 - Erythroid	/	LRPPRC	3.08956e-11	-0.243614	0.009	0.073	6.69754e-07	down
CB1 vs HB1	1 - Erythroid	/	HCFC1R1	3.16367e-11	-0.230924	0.009	0.073	6.85819e-07	down
CB1 vs HB1	1 - Erythroid	/	NEDD8	3.37961e-11	-0.761788	0.146	0.318	7.32632e-07	down
CB1 vs HB1	1 - Erythroid	/	CDK11B	3.38054e-11	-0.196893	0.009	0.073	7.32834e-07	down
CB1 vs HB1	1 - Erythroid	/	COX5B	3.40343e-11	-0.824129	0.218	0.411	7.37796e-07	down
CB1 vs HB1	1 - Erythroid	/	NSFL1C	3.58122e-11	-0.570371	0.037	0.146	7.76337e-07	down
CB1 vs HB1	1 - Erythroid	/	RIF1	3.76883e-11	-0.199596	0.009	0.073	8.17006e-07	down
CB1 vs HB1	1 - Erythroid	/	MEA1	3.82353e-11	-0.373848	0.039	0.151	8.28864e-07	down
CB1 vs HB1	1 - Erythroid	/	RAE1	3.89543e-11	-0.164413	0.009	0.073	8.44452e-07	down
CB1 vs HB1	1 - Erythroid	/	PCBP1	3.89598e-11	-0.402591	0.035	0.141	8.44571e-07	down
CB1 vs HB1	1 - Erythroid	/	CCDC47	3.90632e-11	-0.406191	0.037	0.146	8.46811e-07	down
CB1 vs HB1	1 - Erythroid	/	SVIP	3.99008e-11	-0.375835	0.026	0.12	8.64969e-07	down
CB1 vs HB1	1 - Erythroid	/	MRPL41	4.02824e-11	-0.191447	0.012	0.083	8.73242e-07	down
CB1 vs HB1	1 - Erythroid	/	ADIPOR2	4.17292e-11	-0.2124	0.019	0.104	9.04606e-07	down
CB1 vs HB1	1 - Erythroid	/	TRIM21	4.18399e-11	-0.111544	0.004	0.052	9.07006e-07	down
CB1 vs HB1	1 - Erythroid	/	PAK1IP1	4.21006e-11	-0.152829	0.004	0.052	9.12656e-07	down
CB1 vs HB1	1 - Erythroid	/	SEPHS1	4.21006e-11	-0.203841	0.004	0.052	9.12656e-07	down
CB1 vs HB1	1 - Erythroid	/	ZNRD2	4.24754e-11	-0.243013	0.03	0.13	9.20781e-07	down
CB1 vs HB1	1 - Erythroid	/	LCMT1	4.39701e-11	-0.187365	0.004	0.052	9.53184e-07	down
CB1 vs HB1	1 - Erythroid	/	NEIL3	4.5355e-11	-0.106141	0.004	0.052	9.83205e-07	down
CB1 vs HB1	1 - Erythroid	/	KLHDC8B	4.58542e-11	-0.261259	0.008	0.068	9.94028e-07	down
CB1 vs HB1	1 - Erythroid	/	PARL	4.59208e-11	-0.098667	0.004	0.052	9.95471e-07	down
CB1 vs HB1	1 - Erythroid	/	C8orf88	4.78409e-11	-0.45142	0.016	0.094	1.0371e-06	down
CB1 vs HB1	1 - Erythroid	/	DDX24	4.83891e-11	-0.531776	0.028	0.125	1.04898e-06	down
CB1 vs HB1	1 - Erythroid	/	ERGIC2	5.01426e-11	-0.205048	0.008	0.068	1.08699e-06	down
CB1 vs HB1	1 - Erythroid	/	PLA2G12A	5.04596e-11	-0.193364	0.005	0.057	1.09386e-06	down
CB1 vs HB1	1 - Erythroid	/	SAP18	5.05427e-11	-0.667545	0.309	0.536	1.09566e-06	down
CB1 vs HB1	1 - Erythroid	/	SNRNP200	5.06507e-11	-0.411582	0.016	0.094	1.09801e-06	down
CB1 vs HB1	1 - Erythroid	/	TAF8	5.18935e-11	-0.288439	0.014	0.089	1.12495e-06	down
CB1 vs HB1	1 - Erythroid	/	G2E3	5.24648e-11	-0.334453	0.006	0.062	1.13733e-06	down
CB1 vs HB1	1 - Erythroid	/	RPL21	5.33045e-11	-1.65486	0.767	0.792	1.15553e-06	down
CB1 vs HB1	1 - Erythroid	/	CYREN	5.40139e-11	-0.154728	0.008	0.068	1.17091e-06	down
CB1 vs HB1	1 - Erythroid	/	PGAM1	5.42183e-11	-0.293772	0.014	0.089	1.17534e-06	down
CB1 vs HB1	1 - Erythroid	/	VAMP8	5.44757e-11	-0.350437	0.018	0.099	1.18093e-06	down
CB1 vs HB1	1 - Erythroid	/	MSH2	5.47272e-11	-0.1816	0.006	0.062	1.18638e-06	down
CB1 vs HB1	1 - Erythroid	/	NMNAT3	5.48225e-11	-0.135272	0.008	0.068	1.18844e-06	down
CB1 vs HB1	1 - Erythroid	/	CBWD2	5.50166e-11	-0.235685	0.006	0.062	1.19265e-06	down
CB1 vs HB1	1 - Erythroid	/	FAM192A	5.50321e-11	-0.321188	0.022	0.109	1.19298e-06	down
CB1 vs HB1	1 - Erythroid	/	CPSF6	5.52753e-11	-0.329011	0.016	0.094	1.19826e-06	down
CB1 vs HB1	1 - Erythroid	/	ANKFY1	5.55013e-11	-0.113382	0.002	0.042	1.20316e-06	down
CB1 vs HB1	1 - Erythroid	/	CCDC59	5.64199e-11	-0.311477	0.014	0.089	1.22307e-06	down
CB1 vs HB1	1 - Erythroid	/	ARF6	5.64199e-11	-0.192844	0.014	0.089	1.22307e-06	down
CB1 vs HB1	1 - Erythroid	/	TFAM	5.73866e-11	-0.220492	0.006	0.062	1.24403e-06	down
CB1 vs HB1	1 - Erythroid	/	MRPS6	5.74925e-11	-0.258745	0.005	0.057	1.24632e-06	down
CB1 vs HB1	1 - Erythroid	/	NUDT5	5.76897e-11	-0.206985	0.006	0.062	1.2506e-06	down
CB1 vs HB1	1 - Erythroid	/	NAA38	5.78044e-11	-0.525055	0.067	0.203	1.25308e-06	down
CB1 vs HB1	1 - Erythroid	/	FAAP20	5.80317e-11	-0.116155	0.002	0.042	1.25801e-06	down
CB1 vs HB1	1 - Erythroid	/	UBIAD1	5.80317e-11	-0.19406	0.002	0.042	1.25801e-06	down
CB1 vs HB1	1 - Erythroid	/	RCC1	5.80317e-11	-0.12646	0.002	0.042	1.25801e-06	down
CB1 vs HB1	1 - Erythroid	/	WDR43	5.80317e-11	-0.11894	0.002	0.042	1.25801e-06	down
CB1 vs HB1	1 - Erythroid	/	CWF19L1	5.84642e-11	-0.0898795	0.002	0.042	1.26739e-06	down
CB1 vs HB1	1 - Erythroid	/	SLC25A21	5.85977e-11	-0.190414	0.011	0.078	1.27028e-06	down
CB1 vs HB1	1 - Erythroid	/	CERS2	5.88999e-11	-0.111881	0.002	0.042	1.27683e-06	down
CB1 vs HB1	1 - Erythroid	/	TBRG4	5.88999e-11	-0.0837659	0.002	0.042	1.27683e-06	down
CB1 vs HB1	1 - Erythroid	/	TADA2A	5.88999e-11	-0.149112	0.002	0.042	1.27683e-06	down
CB1 vs HB1	1 - Erythroid	/	RAB5IF	5.88999e-11	-0.161793	0.002	0.042	1.27683e-06	down
CB1 vs HB1	1 - Erythroid	/	PABPC4	5.93388e-11	-0.127211	0.002	0.042	1.28635e-06	down
CB1 vs HB1	1 - Erythroid	/	TSFM	5.93388e-11	-0.112974	0.002	0.042	1.28635e-06	down
CB1 vs HB1	1 - Erythroid	/	PSMC2	5.95977e-11	-0.332985	0.024	0.115	1.29196e-06	down
CB1 vs HB1	1 - Erythroid	/	CMSS1	5.97809e-11	-0.0942938	0.002	0.042	1.29593e-06	down
CB1 vs HB1	1 - Erythroid	/	JADE1	5.97809e-11	-0.138826	0.002	0.042	1.29593e-06	down
CB1 vs HB1	1 - Erythroid	/	CDK5RAP2	6.01722e-11	-0.184521	0.006	0.062	1.30441e-06	down
CB1 vs HB1	1 - Erythroid	/	ING5	6.02262e-11	-0.104581	0.002	0.042	1.30558e-06	down
CB1 vs HB1	1 - Erythroid	/	HAUS8	6.02262e-11	-0.164925	0.002	0.042	1.30558e-06	down
CB1 vs HB1	1 - Erythroid	/	CA3	6.04981e-11	-0.118481	0.005	0.057	1.31148e-06	down
CB1 vs HB1	1 - Erythroid	/	NOP14	6.11266e-11	-0.0979897	0.002	0.042	1.3251e-06	down
CB1 vs HB1	1 - Erythroid	/	AC020915.2	6.11266e-11	-0.0812022	0.002	0.042	1.3251e-06	down
CB1 vs HB1	1 - Erythroid	/	APMAP	6.11266e-11	-0.132392	0.002	0.042	1.3251e-06	down
CB1 vs HB1	1 - Erythroid	/	RBL1	6.11266e-11	-0.119381	0.002	0.042	1.3251e-06	down
CB1 vs HB1	1 - Erythroid	/	CLCN4	6.11266e-11	-0.132835	0.002	0.042	1.3251e-06	down
CB1 vs HB1	1 - Erythroid	/	DDA1	6.14926e-11	-0.238626	0.022	0.109	1.33304e-06	down
CB1 vs HB1	1 - Erythroid	/	INCENP	6.15817e-11	-0.097861	0.002	0.042	1.33497e-06	down
CB1 vs HB1	1 - Erythroid	/	TFRC	6.19948e-11	-0.568877	0.195	0.401	1.34392e-06	down
CB1 vs HB1	1 - Erythroid	/	USP37	6.20401e-11	-0.0824477	0.002	0.042	1.3449e-06	down
CB1 vs HB1	1 - Erythroid	/	ANKMY2	6.20401e-11	-0.105271	0.002	0.042	1.3449e-06	down
CB1 vs HB1	1 - Erythroid	/	SEC13	6.2884e-11	-0.502312	0.036	0.141	1.3632e-06	down
CB1 vs HB1	1 - Erythroid	/	CFDP1	6.33548e-11	-0.306308	0.016	0.094	1.3734e-06	down
CB1 vs HB1	1 - Erythroid	/	RBM15	6.34354e-11	-0.0701772	0.002	0.042	1.37515e-06	down
CB1 vs HB1	1 - Erythroid	/	SCNM1	6.53699e-11	-0.134177	0.011	0.078	1.41709e-06	down
CB1 vs HB1	1 - Erythroid	/	C17orf49	6.60037e-11	-0.188958	0.014	0.089	1.43083e-06	down
CB1 vs HB1	1 - Erythroid	/	NCBP2	6.68445e-11	-0.14945	0.006	0.062	1.44906e-06	down
CB1 vs HB1	1 - Erythroid	/	TOMM22	6.71795e-11	-0.374727	0.028	0.125	1.45632e-06	down
CB1 vs HB1	1 - Erythroid	/	SS18L2	6.73524e-11	-0.238601	0.018	0.099	1.46007e-06	down
CB1 vs HB1	1 - Erythroid	/	RHOG	6.82343e-11	-0.266361	0.022	0.109	1.47918e-06	down
CB1 vs HB1	1 - Erythroid	/	API5	7.34573e-11	-0.272196	0.018	0.099	1.59241e-06	down
CB1 vs HB1	1 - Erythroid	/	USP1	7.45115e-11	-0.191079	0.011	0.078	1.61526e-06	down
CB1 vs HB1	1 - Erythroid	/	FAM117A	7.56188e-11	-0.617989	0.078	0.219	1.63926e-06	down
CB1 vs HB1	1 - Erythroid	/	NDUFA1	7.696e-11	-0.553694	0.147	0.328	1.66834e-06	down
CB1 vs HB1	1 - Erythroid	/	RPL10	7.91546e-11	-2.81934	0.495	0.578	1.71591e-06	down
CB1 vs HB1	1 - Erythroid	/	NBAS	8.12722e-11	-0.191499	0.016	0.094	1.76182e-06	down
CB1 vs HB1	1 - Erythroid	/	EIF2AK4	8.2699e-11	-0.214618	0.02	0.104	1.79275e-06	down
CB1 vs HB1	1 - Erythroid	/	RTCA	8.95396e-11	-0.400952	0.039	0.146	1.94104e-06	down
CB1 vs HB1	1 - Erythroid	/	CWC27	9.56584e-11	-0.273232	0.01	0.073	2.07368e-06	down
CB1 vs HB1	1 - Erythroid	/	RAP1A	9.69225e-11	-0.485232	0.101	0.26	2.10109e-06	down
CB1 vs HB1	1 - Erythroid	/	ACTL6A	9.92009e-11	-0.315682	0.01	0.073	2.15048e-06	down
CB1 vs HB1	1 - Erythroid	/	UCHL5	1.01887e-10	-0.314413	0.029	0.125	2.2087e-06	down
CB1 vs HB1	1 - Erythroid	/	ISY1	1.01919e-10	-0.179823	0.018	0.099	2.2094e-06	down
CB1 vs HB1	1 - Erythroid	/	SSBP2	1.05711e-10	-0.206737	0.01	0.073	2.29161e-06	down
CB1 vs HB1	1 - Erythroid	/	MRPS28	1.08136e-10	-0.136962	0.01	0.073	2.34418e-06	down
CB1 vs HB1	1 - Erythroid	/	FKBP2	1.10616e-10	-0.201805	0.01	0.073	2.39792e-06	down
CB1 vs HB1	1 - Erythroid	/	SPINT2	1.1126e-10	-0.185317	0.013	0.083	2.41189e-06	down
CB1 vs HB1	1 - Erythroid	/	TXNRD1	1.13132e-10	-0.35197	0.034	0.135	2.45248e-06	down
CB1 vs HB1	1 - Erythroid	/	CHURC1	1.17024e-10	-0.340843	0.062	0.193	2.53684e-06	down
CB1 vs HB1	1 - Erythroid	/	RSL1D1	1.21519e-10	-0.307645	0.025	0.115	2.63429e-06	down
CB1 vs HB1	1 - Erythroid	/	TLCD4	1.24739e-10	-0.72845	0.131	0.297	2.7041e-06	down
CB1 vs HB1	1 - Erythroid	/	SNX1	1.27843e-10	-0.372301	0.025	0.115	2.77139e-06	down
CB1 vs HB1	1 - Erythroid	/	SMARCA5	1.28726e-10	-0.260054	0.015	0.089	2.79053e-06	down
CB1 vs HB1	1 - Erythroid	/	PSME3	1.29012e-10	-0.150315	0.01	0.073	2.79671e-06	down
CB1 vs HB1	1 - Erythroid	/	DYNC1LI1	1.30225e-10	-0.230069	0.015	0.089	2.82302e-06	down
CB1 vs HB1	1 - Erythroid	/	SEC61A1	1.33154e-10	-0.146917	0.01	0.073	2.88652e-06	down
CB1 vs HB1	1 - Erythroid	/	ELP2	1.33757e-10	-0.191377	0.01	0.073	2.89958e-06	down
CB1 vs HB1	1 - Erythroid	/	GLRX	1.35181e-10	-0.248328	0.008	0.068	2.93045e-06	down
CB1 vs HB1	1 - Erythroid	/	PCID2	1.36193e-10	-0.191651	0.01	0.073	2.95238e-06	down
CB1 vs HB1	1 - Erythroid	/	ZFAS1	1.39696e-10	-0.335129	0.019	0.099	3.02832e-06	down
CB1 vs HB1	1 - Erythroid	/	BLOC1S1	1.40173e-10	-0.788961	0.193	0.37	3.03866e-06	down
CB1 vs HB1	1 - Erythroid	/	NUMA1	1.4066e-10	-0.224695	0.015	0.089	3.04922e-06	down
CB1 vs HB1	1 - Erythroid	/	WDR1	1.41003e-10	-0.303791	0.029	0.125	3.05667e-06	down
CB1 vs HB1	1 - Erythroid	/	DENR	1.41747e-10	-0.219575	0.015	0.089	3.07279e-06	down
CB1 vs HB1	1 - Erythroid	/	RRAGC	1.43557e-10	-0.111229	0.001	0.036	3.11204e-06	down
CB1 vs HB1	1 - Erythroid	/	U2AF2	1.46241e-10	-0.355682	0.019	0.099	3.1702e-06	down
CB1 vs HB1	1 - Erythroid	/	EIPR1	1.47062e-10	-0.207872	0.001	0.036	3.18801e-06	down
CB1 vs HB1	1 - Erythroid	/	TTF2	1.48249e-10	-0.149301	0.001	0.036	3.21374e-06	down
CB1 vs HB1	1 - Erythroid	/	SAYSD1	1.48249e-10	-0.16083	0.001	0.036	3.21374e-06	down
CB1 vs HB1	1 - Erythroid	/	RINT1	1.48249e-10	-0.130173	0.001	0.036	3.21374e-06	down
CB1 vs HB1	1 - Erythroid	/	DCUN1D1	1.48465e-10	0.450952	0.596	0.365	3.21843e-06	up
CB1 vs HB1	1 - Erythroid	/	POLR1E	1.49445e-10	-0.116505	0.001	0.036	3.23966e-06	down
CB1 vs HB1	1 - Erythroid	/	GINS1	1.49445e-10	-0.143721	0.001	0.036	3.23966e-06	down
CB1 vs HB1	1 - Erythroid	/	NOL9	1.5065e-10	-0.1987	0.001	0.036	3.26579e-06	down
CB1 vs HB1	1 - Erythroid	/	TOR3A	1.51865e-10	-0.0887058	0.001	0.036	3.29213e-06	down
CB1 vs HB1	1 - Erythroid	/	CNOT10	1.51865e-10	-0.11512	0.001	0.036	3.29213e-06	down
CB1 vs HB1	1 - Erythroid	/	DVL2	1.51865e-10	-0.111403	0.001	0.036	3.29213e-06	down
CB1 vs HB1	1 - Erythroid	/	PMS2	1.5309e-10	-0.0829597	0.001	0.036	3.31868e-06	down
CB1 vs HB1	1 - Erythroid	/	CENPL	1.54324e-10	-0.183402	0.001	0.036	3.34543e-06	down
CB1 vs HB1	1 - Erythroid	/	EFCAB11	1.54324e-10	-0.122593	0.001	0.036	3.34543e-06	down
CB1 vs HB1	1 - Erythroid	/	FAM49B	1.54428e-10	-0.183511	0.008	0.068	3.34768e-06	down
CB1 vs HB1	1 - Erythroid	/	NAGA	1.55568e-10	-0.126333	0.001	0.036	3.3724e-06	down
CB1 vs HB1	1 - Erythroid	/	RAB11A	1.56606e-10	-0.215334	0.033	0.135	3.39492e-06	down
CB1 vs HB1	1 - Erythroid	/	GFM1	1.56821e-10	-0.0654816	0.001	0.036	3.39957e-06	down
CB1 vs HB1	1 - Erythroid	/	TPMT	1.56821e-10	-0.084757	0.001	0.036	3.39957e-06	down
CB1 vs HB1	1 - Erythroid	/	MTFP1	1.58085e-10	-0.0757909	0.001	0.036	3.42696e-06	down
CB1 vs HB1	1 - Erythroid	/	TMEM41A	1.59358e-10	-0.0864031	0.001	0.036	3.45457e-06	down
CB1 vs HB1	1 - Erythroid	/	SLF2	1.59358e-10	-0.0593267	0.001	0.036	3.45457e-06	down
CB1 vs HB1	1 - Erythroid	/	DHPS	1.60573e-10	-0.281823	0.032	0.13	3.4809e-06	down
CB1 vs HB1	1 - Erythroid	/	TPRA1	1.60853e-10	-0.297298	0.012	0.078	3.48698e-06	down
CB1 vs HB1	1 - Erythroid	/	CSTB	1.62345e-10	-0.335967	0.049	0.167	3.51932e-06	down
CB1 vs HB1	1 - Erythroid	/	SLC39A3	1.62727e-10	-0.206026	0.003	0.047	3.52759e-06	down
CB1 vs HB1	1 - Erythroid	/	AIMP2	1.64835e-10	-0.168668	0.003	0.047	3.5733e-06	down
CB1 vs HB1	1 - Erythroid	/	METTL5	1.66622e-10	-0.429191	0.032	0.13	3.61204e-06	down
CB1 vs HB1	1 - Erythroid	/	ATP6V0B	1.66893e-10	-0.59593	0.178	0.37	3.61791e-06	down
CB1 vs HB1	1 - Erythroid	/	MRPL1	1.66971e-10	-0.215228	0.003	0.047	3.61959e-06	down
CB1 vs HB1	1 - Erythroid	/	SRP19	1.67405e-10	-0.303474	0.036	0.141	3.62902e-06	down
CB1 vs HB1	1 - Erythroid	/	COX15	1.68049e-10	-0.221593	0.003	0.047	3.64296e-06	down
CB1 vs HB1	1 - Erythroid	/	ATIC	1.73857e-10	-0.222604	0.008	0.068	3.76888e-06	down
CB1 vs HB1	1 - Erythroid	/	UCHL3	1.79208e-10	-0.107	0.003	0.047	3.88487e-06	down
CB1 vs HB1	1 - Erythroid	/	REXO5	1.79208e-10	-0.13984	0.003	0.047	3.88487e-06	down
CB1 vs HB1	1 - Erythroid	/	AARSD1	1.79208e-10	-0.183791	0.003	0.047	3.88487e-06	down
CB1 vs HB1	1 - Erythroid	/	MRTO4	1.80363e-10	-0.106955	0.003	0.047	3.9099e-06	down
CB1 vs HB1	1 - Erythroid	/	RRP8	1.80565e-10	-0.147991	0.008	0.068	3.91428e-06	down
CB1 vs HB1	1 - Erythroid	/	COX7A2	1.81541e-10	-0.631455	0.3	0.505	3.93544e-06	down
CB1 vs HB1	1 - Erythroid	/	CNOT1	1.84013e-10	-0.26861	0.008	0.068	3.98903e-06	down
CB1 vs HB1	1 - Erythroid	/	NDUFAF3	1.84993e-10	-0.686006	0.161	0.339	4.01029e-06	down
CB1 vs HB1	1 - Erythroid	/	RELL1	1.85056e-10	-0.129707	0.003	0.047	4.01163e-06	down
CB1 vs HB1	1 - Erythroid	/	DGUOK	1.86664e-10	-0.505089	0.037	0.141	4.04649e-06	down
CB1 vs HB1	1 - Erythroid	/	MYH10	1.88653e-10	-0.128063	0.003	0.047	4.08963e-06	down
CB1 vs HB1	1 - Erythroid	/	UQCR10	1.89105e-10	-0.899088	0.2	0.375	4.09942e-06	down
CB1 vs HB1	1 - Erythroid	/	SNX6	1.90084e-10	-0.285689	0.021	0.104	4.12065e-06	down
CB1 vs HB1	1 - Erythroid	/	SRFBP1	1.92319e-10	-0.0880406	0.003	0.047	4.1691e-06	down
CB1 vs HB1	1 - Erythroid	/	SQOR	1.94802e-10	-0.0824798	0.003	0.047	4.22292e-06	down
CB1 vs HB1	1 - Erythroid	/	WASHC3	1.98459e-10	-0.132712	0.008	0.068	4.3022e-06	down
CB1 vs HB1	1 - Erythroid	/	OSTC	2.0127e-10	-0.215448	0.021	0.104	4.36314e-06	down
CB1 vs HB1	1 - Erythroid	/	EMC7	2.06092e-10	-0.12998	0.008	0.068	4.46766e-06	down
CB1 vs HB1	1 - Erythroid	/	RTL8C	2.06615e-10	-0.381658	0.014	0.083	4.47901e-06	down
CB1 vs HB1	1 - Erythroid	/	MOV10	2.07483e-10	-0.0661747	0	0.026	4.49781e-06	down
CB1 vs HB1	1 - Erythroid	/	EXO1	2.07483e-10	-0.0552499	0	0.026	4.49781e-06	down
CB1 vs HB1	1 - Erythroid	/	MCEE	2.07483e-10	-0.0775688	0	0.026	4.49781e-06	down
CB1 vs HB1	1 - Erythroid	/	DGUOK-AS1	2.07483e-10	-0.150514	0	0.026	4.49781e-06	down
CB1 vs HB1	1 - Erythroid	/	BOLA3-AS1	2.07483e-10	-0.052297	0	0.026	4.49781e-06	down
CB1 vs HB1	1 - Erythroid	/	SPC25	2.07483e-10	-0.0894337	0	0.026	4.49781e-06	down
CB1 vs HB1	1 - Erythroid	/	SCLY	2.07483e-10	-0.0709626	0	0.026	4.49781e-06	down
CB1 vs HB1	1 - Erythroid	/	ZNF620	2.07483e-10	-0.0573382	0	0.026	4.49781e-06	down
CB1 vs HB1	1 - Erythroid	/	KIF9	2.07483e-10	-0.163285	0	0.026	4.49781e-06	down
CB1 vs HB1	1 - Erythroid	/	BDH1	2.07483e-10	-0.0858857	0	0.026	4.49781e-06	down
CB1 vs HB1	1 - Erythroid	/	TRAPPC13	2.07483e-10	-0.0811694	0	0.026	4.49781e-06	down
CB1 vs HB1	1 - Erythroid	/	XRCC2	2.07483e-10	-0.0585085	0	0.026	4.49781e-06	down
CB1 vs HB1	1 - Erythroid	/	AC246817.2	2.07483e-10	-0.0611656	0	0.026	4.49781e-06	down
CB1 vs HB1	1 - Erythroid	/	ENG	2.07483e-10	-0.0689643	0	0.026	4.49781e-06	down
CB1 vs HB1	1 - Erythroid	/	PIDD1	2.07483e-10	-0.0706473	0	0.026	4.49781e-06	down
CB1 vs HB1	1 - Erythroid	/	UNG	2.07483e-10	-0.0907687	0	0.026	4.49781e-06	down
CB1 vs HB1	1 - Erythroid	/	PXMP2	2.07483e-10	-0.112612	0	0.026	4.49781e-06	down
CB1 vs HB1	1 - Erythroid	/	IFT88	2.07483e-10	-0.0442537	0	0.026	4.49781e-06	down
CB1 vs HB1	1 - Erythroid	/	MCRIP2	2.07483e-10	-0.0538728	0	0.026	4.49781e-06	down
CB1 vs HB1	1 - Erythroid	/	CHTF18	2.07483e-10	-0.0618188	0	0.026	4.49781e-06	down
CB1 vs HB1	1 - Erythroid	/	TMEM186	2.07483e-10	-0.0884684	0	0.026	4.49781e-06	down
CB1 vs HB1	1 - Erythroid	/	EDC4	2.07483e-10	-0.0801473	0	0.026	4.49781e-06	down
CB1 vs HB1	1 - Erythroid	/	EMC8	2.07483e-10	-0.073271	0	0.026	4.49781e-06	down
CB1 vs HB1	1 - Erythroid	/	SRR	2.07483e-10	-0.0635023	0	0.026	4.49781e-06	down
CB1 vs HB1	1 - Erythroid	/	WRAP53	2.07483e-10	-0.0594156	0	0.026	4.49781e-06	down
CB1 vs HB1	1 - Erythroid	/	FDXR	2.07483e-10	-0.0671211	0	0.026	4.49781e-06	down
CB1 vs HB1	1 - Erythroid	/	C19orf54	2.07483e-10	-0.140509	0	0.026	4.49781e-06	down
CB1 vs HB1	1 - Erythroid	/	GAS2L1	2.07483e-10	-0.0723721	0	0.026	4.49781e-06	down
CB1 vs HB1	1 - Erythroid	/	PHETA2	2.07483e-10	-0.118412	0	0.026	4.49781e-06	down
CB1 vs HB1	1 - Erythroid	/	SELENOO	2.07483e-10	-0.0921514	0	0.026	4.49781e-06	down
CB1 vs HB1	1 - Erythroid	/	EPCAM	2.07483e-10	-0.0814011	0	0.026	4.49781e-06	down
CB1 vs HB1	1 - Erythroid	/	APOL4	2.07483e-10	-0.139821	0	0.026	4.49781e-06	down
CB1 vs HB1	1 - Erythroid	/	AL451070.1	2.07483e-10	-0.067762	0	0.026	4.49781e-06	down
CB1 vs HB1	1 - Erythroid	/	SLC43A1	2.10833e-10	-0.492451	0.059	0.182	4.57045e-06	down
CB1 vs HB1	1 - Erythroid	/	KRR1	2.24465e-10	-0.208084	0.007	0.062	4.86596e-06	down
CB1 vs HB1	1 - Erythroid	/	ACAA1	2.27857e-10	-0.149682	0.007	0.062	4.93948e-06	down
CB1 vs HB1	1 - Erythroid	/	HPS4	2.31298e-10	-0.253653	0.007	0.062	5.01408e-06	down
CB1 vs HB1	1 - Erythroid	/	MED4	2.32677e-10	-0.223681	0.014	0.083	5.04397e-06	down
CB1 vs HB1	1 - Erythroid	/	TARDBP	2.32781e-10	-0.22796	0.012	0.078	5.04624e-06	down
CB1 vs HB1	1 - Erythroid	/	SELENOF	2.33147e-10	-0.414191	0.045	0.156	5.05416e-06	down
CB1 vs HB1	1 - Erythroid	/	EPN2	2.33599e-10	-0.291876	0.014	0.083	5.06395e-06	down
CB1 vs HB1	1 - Erythroid	/	IMP4	2.3479e-10	-0.215286	0.007	0.062	5.08978e-06	down
CB1 vs HB1	1 - Erythroid	/	NOC2L	2.41929e-10	-0.117962	0.007	0.062	5.24455e-06	down
CB1 vs HB1	1 - Erythroid	/	MAP3K13	2.45681e-10	-0.33921	0.019	0.099	5.32588e-06	down
CB1 vs HB1	1 - Erythroid	/	SYPL1	2.50527e-10	-0.162102	0.007	0.062	5.43092e-06	down
CB1 vs HB1	1 - Erythroid	/	GTPBP8	2.51116e-10	-0.23462	0.005	0.052	5.44368e-06	down
CB1 vs HB1	1 - Erythroid	/	TESC	2.52168e-10	-0.673224	0.247	0.438	5.4665e-06	down
CB1 vs HB1	1 - Erythroid	/	MRPS30	2.5404e-10	-0.135221	0.005	0.052	5.50708e-06	down
CB1 vs HB1	1 - Erythroid	/	ATP1A1	2.55573e-10	-0.151197	0.007	0.062	5.54031e-06	down
CB1 vs HB1	1 - Erythroid	/	PYCR2	2.56536e-10	-0.73301	0.18	0.359	5.56118e-06	down
CB1 vs HB1	1 - Erythroid	/	ZNF280D	2.56998e-10	-0.234017	0.005	0.052	5.57119e-06	down
CB1 vs HB1	1 - Erythroid	/	FIP1L1	2.58133e-10	-0.187986	0.007	0.062	5.59581e-06	down
CB1 vs HB1	1 - Erythroid	/	ASNS	2.60671e-10	-0.155686	0.001	0.031	5.65083e-06	down
CB1 vs HB1	1 - Erythroid	/	ATOX1	2.62975e-10	-0.269556	0.014	0.083	5.70077e-06	down
CB1 vs HB1	1 - Erythroid	/	DROSHA	2.63025e-10	-0.156812	0.001	0.031	5.70185e-06	down
CB1 vs HB1	1 - Erythroid	/	SFXN2	2.63025e-10	-0.0813499	0.001	0.031	5.70185e-06	down
CB1 vs HB1	1 - Erythroid	/	AKIP1	2.63025e-10	-0.106191	0.001	0.031	5.70185e-06	down
CB1 vs HB1	1 - Erythroid	/	GEMIN8	2.63025e-10	-0.0787316	0.001	0.031	5.70185e-06	down
CB1 vs HB1	1 - Erythroid	/	TBL3	2.64539e-10	-0.202647	0.005	0.052	5.73468e-06	down
CB1 vs HB1	1 - Erythroid	/	AIG1	2.65399e-10	-0.125416	0.001	0.031	5.75332e-06	down
CB1 vs HB1	1 - Erythroid	/	SNUPN	2.65399e-10	-0.0779641	0.001	0.031	5.75332e-06	down
CB1 vs HB1	1 - Erythroid	/	CHCHD7	2.66073e-10	-0.223273	0.005	0.052	5.76794e-06	down
CB1 vs HB1	1 - Erythroid	/	NFX1	2.67292e-10	-0.171838	0.007	0.062	5.79436e-06	down
CB1 vs HB1	1 - Erythroid	/	PRKAA1	2.67616e-10	-0.179929	0.005	0.052	5.80139e-06	down
CB1 vs HB1	1 - Erythroid	/	INTS7	2.67794e-10	-0.169124	0.001	0.031	5.80524e-06	down
CB1 vs HB1	1 - Erythroid	/	TRAIP	2.67794e-10	-0.15827	0.001	0.031	5.80524e-06	down
CB1 vs HB1	1 - Erythroid	/	GOLIM4	2.67794e-10	-0.15564	0.001	0.031	5.80524e-06	down
CB1 vs HB1	1 - Erythroid	/	MMS22L	2.67794e-10	-0.100967	0.001	0.031	5.80524e-06	down
CB1 vs HB1	1 - Erythroid	/	COMMD5	2.67794e-10	-0.0828204	0.001	0.031	5.80524e-06	down
CB1 vs HB1	1 - Erythroid	/	SPOUT1	2.67794e-10	-0.0918207	0.001	0.031	5.80524e-06	down
CB1 vs HB1	1 - Erythroid	/	NUDT15	2.67794e-10	-0.0587566	0.001	0.031	5.80524e-06	down
CB1 vs HB1	1 - Erythroid	/	KMT5C	2.67794e-10	-0.121086	0.001	0.031	5.80524e-06	down
CB1 vs HB1	1 - Erythroid	/	DNPEP	2.7021e-10	-0.0681399	0.001	0.031	5.85762e-06	down
CB1 vs HB1	1 - Erythroid	/	ALKBH4	2.7021e-10	-0.0568125	0.001	0.031	5.85762e-06	down
CB1 vs HB1	1 - Erythroid	/	PFDN2	2.72262e-10	-0.368719	0.035	0.135	5.90209e-06	down
CB1 vs HB1	1 - Erythroid	/	CRCP	2.72297e-10	-0.117121	0.005	0.052	5.90286e-06	down
CB1 vs HB1	1 - Erythroid	/	FUCA2	2.72648e-10	-0.135342	0.001	0.031	5.91046e-06	down
CB1 vs HB1	1 - Erythroid	/	CEP41	2.72648e-10	-0.0787854	0.001	0.031	5.91046e-06	down
CB1 vs HB1	1 - Erythroid	/	FANCG	2.72648e-10	-0.156308	0.001	0.031	5.91046e-06	down
CB1 vs HB1	1 - Erythroid	/	ECPAS	2.72648e-10	-0.153101	0.001	0.031	5.91046e-06	down
CB1 vs HB1	1 - Erythroid	/	MPHOSPH6	2.72648e-10	-0.0612936	0.001	0.031	5.91046e-06	down
CB1 vs HB1	1 - Erythroid	/	PSMC3IP	2.72648e-10	-0.074116	0.001	0.031	5.91046e-06	down
CB1 vs HB1	1 - Erythroid	/	CEP135	2.74947e-10	-0.142081	0.006	0.057	5.9603e-06	down
CB1 vs HB1	1 - Erythroid	/	WDR62	2.75107e-10	-0.0674442	0.001	0.031	5.96376e-06	down
CB1 vs HB1	1 - Erythroid	/	CZIB	2.76798e-10	-0.20564	0.014	0.083	6.00043e-06	down
CB1 vs HB1	1 - Erythroid	/	ARL5A	2.78663e-10	-0.208976	0.005	0.052	6.04086e-06	down
CB1 vs HB1	1 - Erythroid	/	C17orf75	2.83533e-10	-0.187097	0.005	0.052	6.14642e-06	down
CB1 vs HB1	1 - Erythroid	/	STAMBP	2.86921e-10	-0.170764	0.006	0.057	6.21987e-06	down
CB1 vs HB1	1 - Erythroid	/	RTCB	2.87768e-10	-0.388496	0.019	0.099	6.23824e-06	down
CB1 vs HB1	1 - Erythroid	/	NUP42	2.90155e-10	-0.100269	0.005	0.052	6.28998e-06	down
CB1 vs HB1	1 - Erythroid	/	NCBP1	2.91834e-10	-0.092495	0.005	0.052	6.32637e-06	down
CB1 vs HB1	1 - Erythroid	/	STUB1	2.93522e-10	-0.1092	0.005	0.052	6.36298e-06	down
CB1 vs HB1	1 - Erythroid	/	NTMT1	2.96234e-10	-0.186226	0.006	0.057	6.42176e-06	down
CB1 vs HB1	1 - Erythroid	/	CETN3	3.18859e-10	-0.299771	0.016	0.089	6.91222e-06	down
CB1 vs HB1	1 - Erythroid	/	EPB41	3.19178e-10	0.464524	0.87	0.661	6.91913e-06	up
CB1 vs HB1	1 - Erythroid	/	COPS4	3.23276e-10	-0.272154	0.017	0.094	7.00798e-06	down
CB1 vs HB1	1 - Erythroid	/	WASHC1	3.35956e-10	-0.231456	0.016	0.089	7.28285e-06	down
CB1 vs HB1	1 - Erythroid	/	PDCD6IP	3.42491e-10	-0.17824	0.01	0.073	7.42452e-06	down
CB1 vs HB1	1 - Erythroid	/	SERBP1	3.55993e-10	-0.834927	0.183	0.354	7.71722e-06	down
CB1 vs HB1	1 - Erythroid	/	UBA2	3.59241e-10	-0.16404	0.01	0.073	7.78762e-06	down
CB1 vs HB1	1 - Erythroid	/	NDUFS7	3.59997e-10	-0.611317	0.079	0.214	7.80401e-06	down
CB1 vs HB1	1 - Erythroid	/	GLA	3.81718e-10	-0.178405	0.01	0.073	8.27489e-06	down
CB1 vs HB1	1 - Erythroid	/	ZC3H13	3.85071e-10	-0.288784	0.021	0.104	8.34758e-06	down
CB1 vs HB1	1 - Erythroid	/	NFIA	3.86487e-10	-0.475973	0.04	0.146	8.37827e-06	down
CB1 vs HB1	1 - Erythroid	/	LINC00667	4.10863e-10	-0.137555	0.01	0.073	8.90669e-06	down
CB1 vs HB1	1 - Erythroid	/	PSMB4	4.27932e-10	-0.290587	0.026	0.115	9.2767e-06	down
CB1 vs HB1	1 - Erythroid	/	PTGES3	4.35715e-10	-0.893693	0.387	0.573	9.44543e-06	down
CB1 vs HB1	1 - Erythroid	/	NDUFA13	4.53366e-10	-0.682287	0.31	0.51	9.82807e-06	down
CB1 vs HB1	1 - Erythroid	/	CMC2	4.67857e-10	-0.335011	0.024	0.109	1.01422e-05	down
CB1 vs HB1	1 - Erythroid	/	KXD1	4.7888e-10	-0.515764	0.099	0.25	1.03812e-05	down
CB1 vs HB1	1 - Erythroid	/	MALAT1	5.02113e-10	-0.80128	0.436	0.604	1.08848e-05	down
CB1 vs HB1	1 - Erythroid	/	APOO	5.08084e-10	-0.21106	0.009	0.068	1.10142e-05	down
CB1 vs HB1	1 - Erythroid	/	COX16	5.10883e-10	-0.185687	0.012	0.078	1.10749e-05	down
CB1 vs HB1	1 - Erythroid	/	AHSA1	5.36967e-10	-0.376556	0.046	0.156	1.16404e-05	down
CB1 vs HB1	1 - Erythroid	/	PFKM	5.56134e-10	-0.15645	0.012	0.078	1.20559e-05	down
CB1 vs HB1	1 - Erythroid	/	BRD2	5.60716e-10	-0.298358	0.03	0.125	1.21552e-05	down
CB1 vs HB1	1 - Erythroid	/	GYPA	5.79227e-10	-0.84544	0.831	0.87	1.25565e-05	down
CB1 vs HB1	1 - Erythroid	/	ELOB	5.92573e-10	-0.647976	0.693	0.786	1.28458e-05	down
CB1 vs HB1	1 - Erythroid	/	AC010642.2	5.95221e-10	-0.150458	0.009	0.068	1.29032e-05	down
CB1 vs HB1	1 - Erythroid	/	DNAJA1	6.05044e-10	-0.593819	0.191	0.375	1.31162e-05	down
CB1 vs HB1	1 - Erythroid	/	ADAR	6.22689e-10	-0.14587	0.009	0.068	1.34986e-05	down
CB1 vs HB1	1 - Erythroid	/	ZNF706	6.42937e-10	-0.327815	0.014	0.083	1.39376e-05	down
CB1 vs HB1	1 - Erythroid	/	GMCL1	6.48199e-10	-0.181185	0.003	0.042	1.40517e-05	down
CB1 vs HB1	1 - Erythroid	/	TAPBPL	6.48199e-10	-0.112674	0.003	0.042	1.40517e-05	down
CB1 vs HB1	1 - Erythroid	/	FAM32A	6.54711e-10	-0.368459	0.022	0.104	1.41928e-05	down
CB1 vs HB1	1 - Erythroid	/	TTC31	6.61411e-10	-0.197921	0.003	0.042	1.43381e-05	down
CB1 vs HB1	1 - Erythroid	/	PRR13	6.75047e-10	-0.352227	0.036	0.135	1.46337e-05	down
CB1 vs HB1	1 - Erythroid	/	AC012146.1	6.79436e-10	-0.189085	0.003	0.042	1.47288e-05	down
CB1 vs HB1	1 - Erythroid	/	EBAG9	6.84017e-10	-0.137745	0.003	0.042	1.48281e-05	down
CB1 vs HB1	1 - Erythroid	/	DIMT1	6.88627e-10	-0.0947485	0.003	0.042	1.49281e-05	down
CB1 vs HB1	1 - Erythroid	/	RIOK2	6.93269e-10	-0.0882456	0.003	0.042	1.50287e-05	down
CB1 vs HB1	1 - Erythroid	/	TDP1	6.93269e-10	-0.139233	0.003	0.042	1.50287e-05	down
CB1 vs HB1	1 - Erythroid	/	PAK2	6.95453e-10	-0.306768	0.018	0.094	1.5076e-05	down
CB1 vs HB1	1 - Erythroid	/	GUF1	7.02643e-10	-0.121433	0.003	0.042	1.52319e-05	down
CB1 vs HB1	1 - Erythroid	/	ADPRHL2	7.07376e-10	-0.130814	0.003	0.042	1.53345e-05	down
CB1 vs HB1	1 - Erythroid	/	PIGF	7.07376e-10	-0.138673	0.003	0.042	1.53345e-05	down
CB1 vs HB1	1 - Erythroid	/	NUP43	7.07376e-10	-0.129631	0.003	0.042	1.53345e-05	down
CB1 vs HB1	1 - Erythroid	/	PINX1	7.16936e-10	-0.100909	0.003	0.042	1.55417e-05	down
CB1 vs HB1	1 - Erythroid	/	MAGT1	7.16936e-10	-0.120301	0.003	0.042	1.55417e-05	down
CB1 vs HB1	1 - Erythroid	/	PPT1	7.21763e-10	-0.0805156	0.003	0.042	1.56464e-05	down
CB1 vs HB1	1 - Erythroid	/	SELENOI	7.21763e-10	-0.0827251	0.003	0.042	1.56464e-05	down
CB1 vs HB1	1 - Erythroid	/	CIAO2A	7.21933e-10	-0.406854	0.078	0.214	1.56501e-05	down
CB1 vs HB1	1 - Erythroid	/	USP16	7.26229e-10	-0.335798	0.02	0.099	1.57432e-05	down
CB1 vs HB1	1 - Erythroid	/	COPS7B	7.31513e-10	-0.115446	0.003	0.042	1.58577e-05	down
CB1 vs HB1	1 - Erythroid	/	WDR12	7.36435e-10	-0.0765819	0.003	0.042	1.59644e-05	down
CB1 vs HB1	1 - Erythroid	/	EMG1	7.51399e-10	-0.0738706	0.003	0.042	1.62888e-05	down
CB1 vs HB1	1 - Erythroid	/	RAD21	7.91036e-10	-0.716271	0.198	0.38	1.71481e-05	down
CB1 vs HB1	1 - Erythroid	/	C9orf16	7.91365e-10	-0.351871	0.023	0.104	1.71552e-05	down
CB1 vs HB1	1 - Erythroid	/	KLHDC4	7.93408e-10	-0.190088	0.008	0.062	1.71995e-05	down
CB1 vs HB1	1 - Erythroid	/	CCNG1	7.95648e-10	-0.293486	0.034	0.13	1.72481e-05	down
CB1 vs HB1	1 - Erythroid	/	HSPB1	8.27623e-10	-0.666922	0.098	0.24	1.79412e-05	down
CB1 vs HB1	1 - Erythroid	/	HPS1	8.31943e-10	0.554679	0.696	0.516	1.80349e-05	up
CB1 vs HB1	1 - Erythroid	/	TRAF7	8.60643e-10	-0.371664	0.027	0.115	1.8657e-05	down
CB1 vs HB1	1 - Erythroid	/	LMAN1	8.81062e-10	-0.222826	0.016	0.089	1.90997e-05	down
CB1 vs HB1	1 - Erythroid	/	OCIAD1	9.05114e-10	-0.393856	0.076	0.208	1.96211e-05	down
CB1 vs HB1	1 - Erythroid	/	MYL6B	9.06074e-10	-0.152761	0.008	0.062	1.96419e-05	down
CB1 vs HB1	1 - Erythroid	/	TMEM222	9.19033e-10	-0.212301	0.008	0.062	1.99228e-05	down
CB1 vs HB1	1 - Erythroid	/	DDOST	9.36593e-10	-0.135371	0.008	0.062	2.03035e-05	down
CB1 vs HB1	1 - Erythroid	/	UTP18	9.49977e-10	-0.143029	0.008	0.062	2.05936e-05	down
CB1 vs HB1	1 - Erythroid	/	MRPS16	9.88757e-10	-0.340163	0.039	0.141	2.14343e-05	down
CB1 vs HB1	1 - Erythroid	/	PPIB	1.01184e-09	-0.441875	0.066	0.193	2.19346e-05	down
CB1 vs HB1	1 - Erythroid	/	PRELID3B	1.04735e-09	-0.539244	0.101	0.25	2.27045e-05	down
CB1 vs HB1	1 - Erythroid	/	EXOSC10	1.06914e-09	-0.25819	0.006	0.057	2.31769e-05	down
CB1 vs HB1	1 - Erythroid	/	NBEAL1	1.07996e-09	-0.217497	0.006	0.057	2.34115e-05	down
CB1 vs HB1	1 - Erythroid	/	ZFAND1	1.10193e-09	-0.291607	0.006	0.057	2.38876e-05	down
CB1 vs HB1	1 - Erythroid	/	CISH	1.12259e-09	-0.335549	0.004	0.047	2.43356e-05	down
CB1 vs HB1	1 - Erythroid	/	RIOK1	1.12433e-09	-0.206708	0.006	0.057	2.43732e-05	down
CB1 vs HB1	1 - Erythroid	/	DARS	1.14675e-09	-0.221832	0.011	0.073	2.48592e-05	down
CB1 vs HB1	1 - Erythroid	/	RFESD	1.1584e-09	-0.799675	0.193	0.37	2.51117e-05	down
CB1 vs HB1	1 - Erythroid	/	VMP1	1.17047e-09	-0.180558	0.006	0.057	2.53735e-05	down
CB1 vs HB1	1 - Erythroid	/	PELP1	1.17721e-09	-0.155733	0.004	0.047	2.55195e-05	down
CB1 vs HB1	1 - Erythroid	/	EXOSC7	1.18229e-09	-0.127474	0.006	0.057	2.56297e-05	down
CB1 vs HB1	1 - Erythroid	/	DDX52	1.18629e-09	-0.234094	0.029	0.12	2.57165e-05	down
CB1 vs HB1	1 - Erythroid	/	PI4KA	1.19126e-09	-0.231437	0.004	0.047	2.58241e-05	down
CB1 vs HB1	1 - Erythroid	/	BUD23	1.19423e-09	-0.165565	0.006	0.057	2.58885e-05	down
CB1 vs HB1	1 - Erythroid	/	THOC1	1.19835e-09	-0.225258	0.004	0.047	2.59777e-05	down
CB1 vs HB1	1 - Erythroid	/	ABCB10	1.20328e-09	-0.39919	0.034	0.13	2.60848e-05	down
CB1 vs HB1	1 - Erythroid	/	HUS1	1.20628e-09	-0.152314	0.006	0.057	2.61498e-05	down
CB1 vs HB1	1 - Erythroid	/	TOPBP1	1.21265e-09	-0.140732	0.004	0.047	2.62877e-05	down
CB1 vs HB1	1 - Erythroid	/	ARFGAP2	1.21831e-09	-0.238981	0.023	0.104	2.64106e-05	down
CB1 vs HB1	1 - Erythroid	/	ZCCHC17	1.23075e-09	-0.203935	0.006	0.057	2.66802e-05	down
CB1 vs HB1	1 - Erythroid	/	GTF2F2	1.23075e-09	-0.157534	0.006	0.057	2.66802e-05	down
CB1 vs HB1	1 - Erythroid	/	GRPEL1	1.24316e-09	-0.120716	0.006	0.057	2.69493e-05	down
CB1 vs HB1	1 - Erythroid	/	TIMM10B	1.24912e-09	-0.172646	0.004	0.047	2.70785e-05	down
CB1 vs HB1	1 - Erythroid	/	MBIP	1.25655e-09	-0.171228	0.004	0.047	2.72394e-05	down
CB1 vs HB1	1 - Erythroid	/	NAMPT	1.26836e-09	-0.0980749	0.006	0.057	2.74954e-05	down
CB1 vs HB1	1 - Erythroid	/	SMC6	1.27152e-09	-0.101983	0.004	0.047	2.75641e-05	down
CB1 vs HB1	1 - Erythroid	/	PLAGL2	1.27152e-09	-0.180739	0.004	0.047	2.75641e-05	down
CB1 vs HB1	1 - Erythroid	/	NIFK	1.27473e-09	-0.13712	0.006	0.057	2.76337e-05	down
CB1 vs HB1	1 - Erythroid	/	HDAC3	1.27598e-09	-0.273479	0.019	0.094	2.76608e-05	down
CB1 vs HB1	1 - Erythroid	/	CHTF8	1.27908e-09	-0.105925	0.004	0.047	2.77278e-05	down
CB1 vs HB1	1 - Erythroid	/	MAD2L2	1.28001e-09	-0.258629	0.005	0.052	2.7748e-05	down
CB1 vs HB1	1 - Erythroid	/	TYW3	1.29431e-09	-0.153252	0.004	0.047	2.80581e-05	down
CB1 vs HB1	1 - Erythroid	/	NCBP2AS2	1.33318e-09	-0.0994873	0.004	0.047	2.89007e-05	down
CB1 vs HB1	1 - Erythroid	/	TRIM59	1.33894e-09	-0.358263	0.041	0.146	2.90255e-05	down
CB1 vs HB1	1 - Erythroid	/	NKTR	1.38674e-09	-0.282831	0.015	0.083	3.00618e-05	down
CB1 vs HB1	1 - Erythroid	/	NSD2	1.42608e-09	-0.148506	0.005	0.052	3.09146e-05	down
CB1 vs HB1	1 - Erythroid	/	TPM3	1.43184e-09	-0.574438	0.112	0.26	3.10395e-05	down
CB1 vs HB1	1 - Erythroid	/	SDAD1	1.4338e-09	-0.105273	0.005	0.052	3.10818e-05	down
CB1 vs HB1	1 - Erythroid	/	GTF2H3	1.4338e-09	-0.110282	0.005	0.052	3.10818e-05	down
CB1 vs HB1	1 - Erythroid	/	SPAG7	1.4338e-09	-0.14002	0.005	0.052	3.10818e-05	down
CB1 vs HB1	1 - Erythroid	/	OXLD1	1.45324e-09	-0.23411	0.013	0.078	3.15034e-05	down
CB1 vs HB1	1 - Erythroid	/	TOR1AIP1	1.48895e-09	-0.158238	0.005	0.052	3.22775e-05	down
CB1 vs HB1	1 - Erythroid	/	PPIL4	1.50529e-09	-0.238624	0.01	0.068	3.26316e-05	down
CB1 vs HB1	1 - Erythroid	/	MEAF6	1.52622e-09	-0.182138	0.015	0.083	3.30855e-05	down
CB1 vs HB1	1 - Erythroid	/	RBM22	1.53185e-09	-0.266102	0.015	0.083	3.32075e-05	down
CB1 vs HB1	1 - Erythroid	/	CMPK1	1.60031e-09	-0.49352	0.046	0.151	3.46915e-05	down
CB1 vs HB1	1 - Erythroid	/	AMZ2	1.60968e-09	-0.225954	0.019	0.094	3.48946e-05	down
CB1 vs HB1	1 - Erythroid	/	ISCA1	1.66852e-09	0.468585	0.779	0.568	3.61702e-05	up
CB1 vs HB1	1 - Erythroid	/	PRR14	1.67002e-09	-0.22207	0.01	0.068	3.62027e-05	down
CB1 vs HB1	1 - Erythroid	/	PNN	1.68033e-09	-0.191368	0.021	0.099	3.64262e-05	down
CB1 vs HB1	1 - Erythroid	/	NUTM2B-AS1	1.72129e-09	-0.208435	0.01	0.068	3.73141e-05	down
CB1 vs HB1	1 - Erythroid	/	PFDN1	1.80319e-09	-0.347184	0.03	0.12	3.90895e-05	down
CB1 vs HB1	1 - Erythroid	/	MT-CYB	1.83903e-09	-0.976579	0.499	0.672	3.98665e-05	down
CB1 vs HB1	1 - Erythroid	/	TPM1	1.84729e-09	-0.639236	0.118	0.266	4.00456e-05	down
CB1 vs HB1	1 - Erythroid	/	UBAC1	2.00526e-09	-0.971204	0.208	0.375	4.34701e-05	down
CB1 vs HB1	1 - Erythroid	/	SRSF11	2.0973e-09	-0.598239	0.063	0.182	4.54652e-05	down
CB1 vs HB1	1 - Erythroid	/	USP39	2.27606e-09	-0.348055	0.021	0.099	4.93405e-05	down
CB1 vs HB1	1 - Erythroid	/	RBM12	2.30286e-09	-0.159992	0.002	0.036	4.99214e-05	down
CB1 vs HB1	1 - Erythroid	/	SNX8	2.30874e-09	-0.308609	0.021	0.099	5.00488e-05	down
CB1 vs HB1	1 - Erythroid	/	EID1	2.3107e-09	-0.681416	0.168	0.328	5.00913e-05	down
CB1 vs HB1	1 - Erythroid	/	PHRF1	2.33595e-09	-0.200246	0.002	0.036	5.06387e-05	down
[truncated: 5,871 more rows]

## Sheet: Full_DEG_List_CB3_vs_HB3
comparison_group	major_cell_type	minor_cell_type	gene_name	p_val	avg_log2FC	pct.1	pct.2	p_val_adj	trend
CB3 vs HB3	2 - MKs	/	TPM1	9.18103e-11	1.50901	0.62	0.223	1.99026e-06	up
CB3 vs HB3	2 - MKs	/	CCND3	2.13617e-10	1.19066	0.797	0.544	4.6308e-06	up
CB3 vs HB3	2 - MKs	/	TPM4	1.46298e-09	0.955353	0.899	0.612	3.17146e-05	up
CB3 vs HB3	2 - MKs	/	FTH1	1.69424e-08	0.78356	0.956	0.709	0.000367278	up
CB3 vs HB3	2 - MKs	/	ACRBP	2.66899e-08	-1.10471	0.582	0.806	0.000578583	down
CB3 vs HB3	2 - MKs	/	NRGN	3.23486e-08	0.713391	0.962	0.825	0.000701253	up
CB3 vs HB3	2 - MKs	/	PFN1	7.86181e-08	1.12665	0.759	0.447	0.00170428	up
CB3 vs HB3	2 - MKs	/	TSC22D1	3.64534e-07	-0.698864	0.81	0.99	0.00790236	down
CB3 vs HB3	2 - MKs	/	PGRMC1	5.95463e-07	0.756308	0.848	0.641	0.0129084	up
CB3 vs HB3	2 - MKs	/	CST3	6.94179e-07	1.08314	0.57	0.243	0.0150484	up
CB3 vs HB3	2 - MKs	/	ANP32B	1.04221e-06	1.51634	0.373	0.107	0.0225929	up
CB3 vs HB3	2 - MKs	/	HBG2	1.16592e-06	-2.55778	0.013	0.175	0.0252748	down
CB3 vs HB3	2 - MKs	/	RPL13	1.44056e-06	1.65587	0.405	0.136	0.0312284	up
CB3 vs HB3	4 - Mono	4a - CD14+ Mono	RPS4Y1	9.61116e-92	1.2048	0.361	0.058	2.08351e-87	up
CB3 vs HB3	4 - Mono	4a - CD14+ Mono	CD74	8.18473e-74	0.866129	0.99	0.949	1.77429e-69	up
CB3 vs HB3	4 - Mono	4a - CD14+ Mono	HLA-DRB5	8.61945e-73	1.02894	0.836	0.457	1.86852e-68	up
CB3 vs HB3	4 - Mono	4a - CD14+ Mono	HLA-DQB1	1.48001e-71	1.03108	0.694	0.292	3.20837e-67	up
CB3 vs HB3	4 - Mono	4a - CD14+ Mono	PSAP	4.31624e-70	0.80167	0.969	0.936	9.35676e-66	up
CB3 vs HB3	4 - Mono	4a - CD14+ Mono	HLA-B	2.22022e-66	0.671844	0.99	0.971	4.813e-62	up
CB3 vs HB3	4 - Mono	4a - CD14+ Mono	MALAT1	3.52768e-64	0.842124	0.987	0.99	7.6473e-60	up
CB3 vs HB3	4 - Mono	4a - CD14+ Mono	IFI44L	4.50901e-61	0.737919	0.331	0.074	9.77464e-57	up
CB3 vs HB3	4 - Mono	4a - CD14+ Mono	TXNIP	5.00364e-58	1.06488	0.881	0.677	1.08469e-53	up
CB3 vs HB3	4 - Mono	4a - CD14+ Mono	UTY	5.13023e-51	0.309207	0.164	0.019	1.11213e-46	up
CB3 vs HB3	4 - Mono	4a - CD14+ Mono	SH3BGRL3	6.04787e-50	-0.440888	0.985	0.992	1.31106e-45	down
CB3 vs HB3	4 - Mono	4a - CD14+ Mono	DDX3Y	1.29487e-49	0.295006	0.151	0.016	2.80701e-45	up
CB3 vs HB3	4 - Mono	4a - CD14+ Mono	FTH1	1.56988e-45	-0.79972	0.977	0.994	3.4032e-41	down
CB3 vs HB3	4 - Mono	4a - CD14+ Mono	HBB	1.70593e-42	-4.09917	0.006	0.311	3.69812e-38	down
CB3 vs HB3	4 - Mono	4a - CD14+ Mono	FCN1	1.15167e-41	0.557877	0.973	0.943	2.4966e-37	up
CB3 vs HB3	4 - Mono	4a - CD14+ Mono	IFI44	8.77437e-41	0.522035	0.237	0.055	1.90211e-36	up
CB3 vs HB3	4 - Mono	4a - CD14+ Mono	VIM	3.76725e-39	-0.546543	0.979	0.988	8.16666e-35	down
CB3 vs HB3	4 - Mono	4a - CD14+ Mono	ALDH1A1	1.59045e-38	0.500522	0.3	0.088	3.44777e-34	up
CB3 vs HB3	4 - Mono	4a - CD14+ Mono	HLA-A	5.80245e-38	0.552598	0.971	0.915	1.25786e-33	up
CB3 vs HB3	4 - Mono	4a - CD14+ Mono	PFN1	1.63039e-36	-0.613402	0.841	0.95	3.53435e-32	down
CB3 vs HB3	4 - Mono	4a - CD14+ Mono	RPS26	3.94418e-35	-0.668173	0.943	0.981	8.55019e-31	down
CB3 vs HB3	4 - Mono	4a - CD14+ Mono	AL157402.2	1.05115e-32	0.296112	0.159	0.031	2.27869e-28	up
CB3 vs HB3	4 - Mono	4a - CD14+ Mono	FGL2	1.44552e-32	0.642506	0.889	0.666	3.1336e-28	up
CB3 vs HB3	4 - Mono	4a - CD14+ Mono	HLA-DRB1	5.52791e-32	0.590357	0.929	0.773	1.19834e-27	up
CB3 vs HB3	4 - Mono	4a - CD14+ Mono	XAF1	2.99094e-31	0.569477	0.535	0.262	6.48376e-27	up
CB3 vs HB3	4 - Mono	4a - CD14+ Mono	HLA-F	4.00614e-31	0.592432	0.541	0.27	8.68451e-27	up
CB3 vs HB3	4 - Mono	4a - CD14+ Mono	TRAPPC5	4.86978e-31	-0.770807	0.44	0.688	1.05567e-26	down
CB3 vs HB3	4 - Mono	4a - CD14+ Mono	HLA-DPA1	8.38348e-31	0.662029	0.763	0.497	1.81737e-26	up
CB3 vs HB3	4 - Mono	4a - CD14+ Mono	RNF213	5.10842e-30	0.635347	0.765	0.514	1.1074e-25	up
CB3 vs HB3	4 - Mono	4a - CD14+ Mono	S100A12	1.5706e-29	-1.05426	0.883	0.91	3.40474e-25	down
CB3 vs HB3	4 - Mono	4a - CD14+ Mono	RPL13	3.88375e-29	-0.452486	0.941	0.984	8.4192e-25	down
CB3 vs HB3	4 - Mono	4a - CD14+ Mono	B2M	5.51497e-29	0.36994	0.996	0.994	1.19553e-24	up
CB3 vs HB3	4 - Mono	4a - CD14+ Mono	S100A10	7.02965e-29	-0.467509	0.966	0.971	1.52389e-24	down
CB3 vs HB3	4 - Mono	4a - CD14+ Mono	HLA-DPB1	7.99347e-29	0.731052	0.679	0.434	1.73283e-24	up
CB3 vs HB3	4 - Mono	4a - CD14+ Mono	PYCARD	4.82578e-28	-0.559608	0.839	0.884	1.04613e-23	down
CB3 vs HB3	4 - Mono	4a - CD14+ Mono	FTL	3.33102e-27	-0.270481	0.996	0.996	7.22098e-23	down
CB3 vs HB3	4 - Mono	4a - CD14+ Mono	HSPA8	7.30062e-27	0.577985	0.746	0.544	1.58263e-22	up
CB3 vs HB3	4 - Mono	4a - CD14+ Mono	MX1	8.46976e-27	0.690426	0.478	0.241	1.83607e-22	up
CB3 vs HB3	4 - Mono	4a - CD14+ Mono	ACTB	1.72562e-26	-0.265449	0.998	0.999	3.7408e-22	down
CB3 vs HB3	4 - Mono	4a - CD14+ Mono	TNFSF13	1.90696e-26	0.549911	0.625	0.364	4.13391e-22	up
CB3 vs HB3	4 - Mono	4a - CD14+ Mono	MT2A	3.82363e-26	0.902097	0.547	0.3	8.28887e-22	up
CB3 vs HB3	4 - Mono	4a - CD14+ Mono	U2AF1L5	4.00792e-26	0.133961	0.063	0.004	8.68837e-22	up
CB3 vs HB3	4 - Mono	4a - CD14+ Mono	OAS3	4.89557e-26	0.474796	0.264	0.094	1.06126e-21	up
CB3 vs HB3	4 - Mono	4a - CD14+ Mono	RPS29	6.50388e-26	0.595013	0.832	0.643	1.40991e-21	up
CB3 vs HB3	4 - Mono	4a - CD14+ Mono	HBG2	1.23666e-25	-4.16221	0.002	0.197	2.68084e-21	down
CB3 vs HB3	4 - Mono	4a - CD14+ Mono	EIF1AY	2.54459e-25	0.173155	0.08	0.009	5.51617e-21	up
CB3 vs HB3	4 - Mono	4a - CD14+ Mono	HSP90B1	1.90735e-24	0.620612	0.597	0.34	4.13475e-20	up
CB3 vs HB3	4 - Mono	4a - CD14+ Mono	TPPP3	4.18319e-24	0.458629	0.289	0.113	9.06833e-20	up
CB3 vs HB3	4 - Mono	4a - CD14+ Mono	RPS27	5.4339e-24	0.509914	0.977	0.937	1.17796e-19	up
CB3 vs HB3	4 - Mono	4a - CD14+ Mono	GBP1	5.80555e-24	0.326301	0.166	0.044	1.25853e-19	up
CB3 vs HB3	4 - Mono	4a - CD14+ Mono	BST2	8.68929e-24	0.550174	0.744	0.506	1.88366e-19	up
CB3 vs HB3	4 - Mono	4a - CD14+ Mono	HLA-DMB	1.05748e-23	0.450332	0.491	0.255	2.29241e-19	up
CB3 vs HB3	4 - Mono	4a - CD14+ Mono	HLA-DQA1	1.48322e-23	0.54428	0.254	0.094	3.21532e-19	up
CB3 vs HB3	4 - Mono	4a - CD14+ Mono	OAS2	3.19305e-23	0.39394	0.317	0.131	6.92189e-19	up
CB3 vs HB3	4 - Mono	4a - CD14+ Mono	HLA-DRA	6.98685e-23	0.485271	0.927	0.791	1.51461e-18	up
CB3 vs HB3	4 - Mono	4a - CD14+ Mono	HLA-E	7.23553e-23	0.412254	0.941	0.855	1.56852e-18	up
CB3 vs HB3	4 - Mono	4a - CD14+ Mono	EPSTI1	1.35536e-22	0.499516	0.356	0.163	2.93815e-18	up
CB3 vs HB3	4 - Mono	4a - CD14+ Mono	PLAAT4	1.67828e-22	0.390437	0.356	0.156	3.63817e-18	up
CB3 vs HB3	4 - Mono	4a - CD14+ Mono	TRIM22	4.03754e-22	0.405166	0.495	0.261	8.75257e-18	up
CB3 vs HB3	4 - Mono	4a - CD14+ Mono	CD4	4.24984e-22	0.418202	0.577	0.331	9.21281e-18	up
CB3 vs HB3	4 - Mono	4a - CD14+ Mono	MT-ND2	2.09346e-21	0.425719	0.96	0.917	4.5382e-17	up
CB3 vs HB3	4 - Mono	4a - CD14+ Mono	LY6E	2.32947e-21	0.482713	0.7	0.49	5.04983e-17	up
CB3 vs HB3	4 - Mono	4a - CD14+ Mono	STXBP2	4.54961e-21	-0.600433	0.881	0.909	9.86265e-17	down
CB3 vs HB3	4 - Mono	4a - CD14+ Mono	PSME2	8.71609e-21	0.472124	0.786	0.555	1.88947e-16	up
CB3 vs HB3	4 - Mono	4a - CD14+ Mono	CXCL8	1.12866e-20	-1.28679	0.287	0.474	2.44671e-16	down
CB3 vs HB3	4 - Mono	4a - CD14+ Mono	LGALS1	2.95522e-20	-0.407314	0.96	0.963	6.40632e-16	down
CB3 vs HB3	4 - Mono	4a - CD14+ Mono	LINC00278	2.98617e-20	0.148707	0.08	0.013	6.47341e-16	up
CB3 vs HB3	4 - Mono	4a - CD14+ Mono	CYBA	4.02157e-20	-0.60742	0.656	0.756	8.71797e-16	down
CB3 vs HB3	4 - Mono	4a - CD14+ Mono	RPS2	5.04706e-20	-0.459472	0.824	0.863	1.0941e-15	down
CB3 vs HB3	4 - Mono	4a - CD14+ Mono	CFL1	5.77039e-20	-0.301005	0.971	0.972	1.25091e-15	down
CB3 vs HB3	4 - Mono	4a - CD14+ Mono	RSRP1	1.06303e-19	0.473008	0.652	0.413	2.30443e-15	up
CB3 vs HB3	4 - Mono	4a - CD14+ Mono	UBE2L6	1.50827e-19	0.438712	0.608	0.378	3.26964e-15	up
CB3 vs HB3	4 - Mono	4a - CD14+ Mono	STAT2	1.96854e-19	0.497209	0.459	0.246	4.26739e-15	up
CB3 vs HB3	4 - Mono	4a - CD14+ Mono	PML	2.62356e-19	0.329306	0.245	0.097	5.68736e-15	up
CB3 vs HB3	4 - Mono	4a - CD14+ Mono	ERAP2	2.89012e-19	0.264442	0.199	0.07	6.26519e-15	up
CB3 vs HB3	4 - Mono	4a - CD14+ Mono	IRF9	4.2672e-19	0.406658	0.413	0.212	9.25043e-15	up
CB3 vs HB3	4 - Mono	4a - CD14+ Mono	TSPO	8.21626e-19	-0.35859	0.964	0.969	1.78112e-14	down
CB3 vs HB3	4 - Mono	4a - CD14+ Mono	CSF3R	9.51613e-19	0.45396	0.868	0.711	2.06291e-14	up
CB3 vs HB3	4 - Mono	4a - CD14+ Mono	GRN	2.20801e-18	0.427427	0.889	0.784	4.78652e-14	up
CB3 vs HB3	4 - Mono	4a - CD14+ Mono	PGLS	2.9747e-18	-0.518148	0.547	0.7	6.44856e-14	down
CB3 vs HB3	4 - Mono	4a - CD14+ Mono	JUND	3.72147e-18	-0.849446	0.43	0.554	8.06741e-14	down
CB3 vs HB3	4 - Mono	4a - CD14+ Mono	SELL	5.14818e-18	0.468665	0.732	0.535	1.11602e-13	up
CB3 vs HB3	4 - Mono	4a - CD14+ Mono	CDC42EP2	7.72982e-18	0.300281	0.218	0.085	1.67567e-13	up
CB3 vs HB3	4 - Mono	4a - CD14+ Mono	GBP4	8.92648e-18	0.24516	0.172	0.058	1.93508e-13	up
CB3 vs HB3	4 - Mono	4a - CD14+ Mono	MT-ND3	9.46711e-18	0.735323	0.954	0.907	2.05228e-13	up
CB3 vs HB3	4 - Mono	4a - CD14+ Mono	USP9Y	1.0927e-17	0.110207	0.042	0.003	2.36875e-13	up
CB3 vs HB3	4 - Mono	4a - CD14+ Mono	NR4A1	1.11355e-17	0.400132	0.365	0.183	2.41396e-13	up
CB3 vs HB3	4 - Mono	4a - CD14+ Mono	HSPA1A	1.28963e-17	0.410635	0.585	0.369	2.79567e-13	up
CB3 vs HB3	4 - Mono	4a - CD14+ Mono	JUN	1.58395e-17	-0.683191	0.486	0.648	3.43369e-13	down
CB3 vs HB3	4 - Mono	4a - CD14+ Mono	UBE2J1	1.79156e-17	-0.714485	0.317	0.467	3.88375e-13	down
CB3 vs HB3	4 - Mono	4a - CD14+ Mono	IGKV4-1	2.06233e-17	0.0573742	0.029	0.001	4.47072e-13	up
CB3 vs HB3	4 - Mono	4a - CD14+ Mono	PARP14	2.15054e-17	0.428856	0.457	0.257	4.66194e-13	up
CB3 vs HB3	4 - Mono	4a - CD14+ Mono	F13A1	2.38395e-17	-0.788402	0.166	0.334	5.16793e-13	down
CB3 vs HB3	4 - Mono	4a - CD14+ Mono	ATP6V0C	3.10128e-17	-0.430106	0.746	0.86	6.72296e-13	down
CB3 vs HB3	4 - Mono	4a - CD14+ Mono	PDE4B	3.45409e-17	0.367827	0.31	0.146	7.48778e-13	up
CB3 vs HB3	4 - Mono	4a - CD14+ Mono	RPL37	5.67699e-17	0.33228	0.985	0.971	1.23066e-12	up
CB3 vs HB3	4 - Mono	4a - CD14+ Mono	MT-ATP8	6.90525e-17	0.572365	0.843	0.69	1.49692e-12	up
CB3 vs HB3	4 - Mono	4a - CD14+ Mono	LGALS9	1.03241e-16	0.381307	0.711	0.495	2.23805e-12	up
CB3 vs HB3	4 - Mono	4a - CD14+ Mono	LRP1	1.28217e-16	0.437573	0.738	0.523	2.77949e-12	up
CB3 vs HB3	4 - Mono	4a - CD14+ Mono	MGAT1	1.31205e-16	0.351431	0.629	0.402	2.84425e-12	up
CB3 vs HB3	4 - Mono	4a - CD14+ Mono	SERP1	1.3787e-16	-0.466251	0.604	0.787	2.98874e-12	down
CB3 vs HB3	4 - Mono	4a - CD14+ Mono	TIMP1	1.71143e-16	-0.608594	0.723	0.762	3.71005e-12	down
CB3 vs HB3	4 - Mono	4a - CD14+ Mono	GAPDH	2.01462e-16	-0.323356	0.983	0.98	4.36729e-12	down
CB3 vs HB3	4 - Mono	4a - CD14+ Mono	IFITM2	2.46269e-16	-0.725805	0.916	0.931	5.33861e-12	down
CB3 vs HB3	4 - Mono	4a - CD14+ Mono	CPVL	2.97016e-16	0.482967	0.679	0.482	6.43871e-12	up
CB3 vs HB3	4 - Mono	4a - CD14+ Mono	LGALS3BP	3.06547e-16	0.187117	0.071	0.013	6.64532e-12	up
CB3 vs HB3	4 - Mono	4a - CD14+ Mono	NAMPT	3.37996e-16	-0.557603	0.662	0.774	7.32707e-12	down
CB3 vs HB3	4 - Mono	4a - CD14+ Mono	OAS1	3.45968e-16	0.369988	0.447	0.249	7.49988e-12	up
CB3 vs HB3	4 - Mono	4a - CD14+ Mono	IGLV6-57	3.55561e-16	0.0709822	0.025	0	7.70786e-12	up
CB3 vs HB3	4 - Mono	4a - CD14+ Mono	CD14	5.09105e-16	0.412304	0.931	0.843	1.10364e-11	up
CB3 vs HB3	4 - Mono	4a - CD14+ Mono	ADA2	8.4889e-16	0.4044	0.633	0.416	1.84022e-11	up
CB3 vs HB3	4 - Mono	4a - CD14+ Mono	MX2	9.26074e-16	0.425165	0.495	0.297	2.00754e-11	up
CB3 vs HB3	4 - Mono	4a - CD14+ Mono	FAM157C	1.12992e-15	0.257583	0.203	0.082	2.44944e-11	up
CB3 vs HB3	4 - Mono	4a - CD14+ Mono	DDX58	1.19794e-15	0.276621	0.205	0.083	2.59689e-11	up
CB3 vs HB3	4 - Mono	4a - CD14+ Mono	ECE1	1.49044e-15	0.25673	0.317	0.152	3.23098e-11	up
CB3 vs HB3	4 - Mono	4a - CD14+ Mono	ACTG1	1.61784e-15	-0.31833	0.975	0.964	3.50715e-11	down
CB3 vs HB3	4 - Mono	4a - CD14+ Mono	CLEC12A	1.71039e-15	0.352879	0.715	0.51	3.70779e-11	up
CB3 vs HB3	4 - Mono	4a - CD14+ Mono	RABGAP1L	2.11755e-15	0.371215	0.465	0.27	4.59042e-11	up
CB3 vs HB3	4 - Mono	4a - CD14+ Mono	TAGAP	3.67654e-15	0.380218	0.463	0.274	7.96999e-11	up
CB3 vs HB3	4 - Mono	4a - CD14+ Mono	BTN3A2	3.88572e-15	0.212371	0.239	0.104	8.42346e-11	up
CB3 vs HB3	4 - Mono	4a - CD14+ Mono	ADGRE5	5.01537e-15	0.483303	0.786	0.653	1.08723e-10	up
CB3 vs HB3	4 - Mono	4a - CD14+ Mono	DGLUCY	6.10904e-15	0.255327	0.224	0.097	1.32432e-10	up
CB3 vs HB3	4 - Mono	4a - CD14+ Mono	KLHDC8B	6.16088e-15	0.128267	0.073	0.015	1.33556e-10	up
CB3 vs HB3	4 - Mono	4a - CD14+ Mono	S100A9	1.03799e-14	-0.414232	0.99	0.995	2.25016e-10	down
CB3 vs HB3	4 - Mono	4a - CD14+ Mono	BCL2A1	1.30079e-14	-0.767513	0.463	0.572	2.81984e-10	down
CB3 vs HB3	4 - Mono	4a - CD14+ Mono	IFI6	2.00972e-14	0.432807	0.472	0.288	4.35667e-10	up
CB3 vs HB3	4 - Mono	4a - CD14+ Mono	HSPE1	3.3187e-14	0.238959	0.327	0.164	7.19428e-10	up
CB3 vs HB3	4 - Mono	4a - CD14+ Mono	TAP1	4.07991e-14	0.374487	0.365	0.2	8.84443e-10	up
CB3 vs HB3	4 - Mono	4a - CD14+ Mono	AOAH	4.44246e-14	0.404674	0.57	0.378	9.63037e-10	up
CB3 vs HB3	4 - Mono	4a - CD14+ Mono	LINC02470	4.53454e-14	0.170988	0.101	0.028	9.82998e-10	up
CB3 vs HB3	4 - Mono	4a - CD14+ Mono	GRASP	5.6273e-14	0.176019	0.109	0.032	1.21989e-09	up
CB3 vs HB3	4 - Mono	4a - CD14+ Mono	JUP	5.98454e-14	0.216458	0.197	0.082	1.29733e-09	up
CB3 vs HB3	4 - Mono	4a - CD14+ Mono	APOL3	6.85384e-14	0.19488	0.212	0.09	1.48578e-09	up
CB3 vs HB3	4 - Mono	4a - CD14+ Mono	CUL1	6.91888e-14	0.229324	0.243	0.111	1.49988e-09	up
CB3 vs HB3	4 - Mono	4a - CD14+ Mono	NECAP2	7.10834e-14	0.250312	0.451	0.26	1.54095e-09	up
CB3 vs HB3	4 - Mono	4a - CD14+ Mono	ACO1	7.33601e-14	0.139584	0.088	0.023	1.5903e-09	up
CB3 vs HB3	4 - Mono	4a - CD14+ Mono	HEXA	7.4969e-14	0.296171	0.325	0.17	1.62518e-09	up
CB3 vs HB3	4 - Mono	4a - CD14+ Mono	CLEC4E	8.7088e-14	0.367898	0.392	0.22	1.88789e-09	up
CB3 vs HB3	4 - Mono	4a - CD14+ Mono	ZBP1	8.75972e-14	0.175051	0.088	0.023	1.89893e-09	up
CB3 vs HB3	4 - Mono	4a - CD14+ Mono	NSF	8.97253e-14	0.159515	0.243	0.11	1.94506e-09	up
CB3 vs HB3	4 - Mono	4a - CD14+ Mono	RPS21	8.98793e-14	0.324123	0.973	0.93	1.9484e-09	up
CB3 vs HB3	4 - Mono	4a - CD14+ Mono	IGHV3-74	9.51154e-14	0.136445	0.019	0	2.06191e-09	up
CB3 vs HB3	4 - Mono	4a - CD14+ Mono	CALM1	1.02716e-13	-0.420533	0.732	0.785	2.22667e-09	down
CB3 vs HB3	4 - Mono	4a - CD14+ Mono	LILRB1	1.22444e-13	0.366237	0.547	0.346	2.65434e-09	up
CB3 vs HB3	4 - Mono	4a - CD14+ Mono	PSMB9	1.48324e-13	0.377716	0.696	0.503	3.21536e-09	up
CB3 vs HB3	4 - Mono	4a - CD14+ Mono	IFIT2	1.96289e-13	0.465303	0.164	0.065	4.25514e-09	up
CB3 vs HB3	4 - Mono	4a - CD14+ Mono	ATP2B1-AS1	2.10657e-13	-0.549384	0.597	0.693	4.56662e-09	down
CB3 vs HB3	4 - Mono	4a - CD14+ Mono	MRPS18C	2.59699e-13	0.301167	0.356	0.193	5.62975e-09	up
CB3 vs HB3	4 - Mono	4a - CD14+ Mono	IFIT3	2.65051e-13	0.347039	0.176	0.072	5.74577e-09	up
CB3 vs HB3	4 - Mono	4a - CD14+ Mono	UBR2	2.72526e-13	0.313648	0.335	0.182	5.90781e-09	up
CB3 vs HB3	4 - Mono	4a - CD14+ Mono	HLA-DMA	3.08058e-13	0.300201	0.602	0.397	6.67808e-09	up
CB3 vs HB3	4 - Mono	4a - CD14+ Mono	WARS	3.48579e-13	0.359002	0.597	0.407	7.55649e-09	up
CB3 vs HB3	4 - Mono	4a - CD14+ Mono	TPCN1	4.70193e-13	0.189487	0.208	0.091	1.01929e-08	up
CB3 vs HB3	4 - Mono	4a - CD14+ Mono	MYL6	5.16022e-13	-0.244061	0.977	0.984	1.11863e-08	down
CB3 vs HB3	4 - Mono	4a - CD14+ Mono	ZFY	5.37265e-13	0.0715962	0.042	0.005	1.16468e-08	up
CB3 vs HB3	4 - Mono	4a - CD14+ Mono	RPL37A	5.95532e-13	0.483355	0.941	0.883	1.291e-08	up
CB3 vs HB3	4 - Mono	4a - CD14+ Mono	RPL34	6.34538e-13	0.24359	0.979	0.987	1.37555e-08	up
CB3 vs HB3	4 - Mono	4a - CD14+ Mono	SLFN5	7.90122e-13	0.242007	0.128	0.046	1.71283e-08	up
CB3 vs HB3	4 - Mono	4a - CD14+ Mono	SPI1	8.97379e-13	-0.46895	0.522	0.671	1.94534e-08	down
CB3 vs HB3	4 - Mono	4a - CD14+ Mono	LILRB2	9.29629e-13	0.336149	0.767	0.588	2.01525e-08	up
CB3 vs HB3	4 - Mono	4a - CD14+ Mono	RPS28	9.58857e-13	0.298991	0.983	0.985	2.07861e-08	up
CB3 vs HB3	4 - Mono	4a - CD14+ Mono	GNG5	9.69549e-13	-0.398165	0.836	0.848	2.10179e-08	down
CB3 vs HB3	4 - Mono	4a - CD14+ Mono	CTSS	1.01648e-12	0.278217	0.985	0.966	2.20352e-08	up
CB3 vs HB3	4 - Mono	4a - CD14+ Mono	TMED9	1.03254e-12	0.285451	0.386	0.22	2.23834e-08	up
CB3 vs HB3	4 - Mono	4a - CD14+ Mono	POLR2J3	1.06914e-12	0.252691	0.252	0.122	2.31767e-08	up
CB3 vs HB3	4 - Mono	4a - CD14+ Mono	PDCD4	1.21338e-12	0.205486	0.306	0.158	2.63037e-08	up
CB3 vs HB3	4 - Mono	4a - CD14+ Mono	S100A8	1.23076e-12	-0.397872	0.99	0.994	2.66804e-08	down
CB3 vs HB3	4 - Mono	4a - CD14+ Mono	POLK	1.42791e-12	0.270437	0.222	0.105	3.09543e-08	up
CB3 vs HB3	4 - Mono	4a - CD14+ Mono	AKAP9	1.46199e-12	0.356464	0.428	0.257	3.16931e-08	up
CB3 vs HB3	4 - Mono	4a - CD14+ Mono	AP1S2	1.57865e-12	0.306051	0.681	0.479	3.4222e-08	up
CB3 vs HB3	4 - Mono	4a - CD14+ Mono	PLOD3	1.59307e-12	0.18716	0.164	0.066	3.45345e-08	up
CB3 vs HB3	4 - Mono	4a - CD14+ Mono	RPL38	1.59443e-12	0.383933	0.868	0.745	3.45641e-08	up
CB3 vs HB3	4 - Mono	4a - CD14+ Mono	DNAJA3	1.6611e-12	0.124729	0.096	0.029	3.60094e-08	up
CB3 vs HB3	4 - Mono	4a - CD14+ Mono	ITGB2	1.91465e-12	0.334929	0.929	0.865	4.15057e-08	up
CB3 vs HB3	4 - Mono	4a - CD14+ Mono	ITGA4	2.27862e-12	0.317129	0.512	0.324	4.93959e-08	up
CB3 vs HB3	4 - Mono	4a - CD14+ Mono	ZFP36L2	2.28261e-12	0.348955	0.618	0.421	4.94825e-08	up
CB3 vs HB3	4 - Mono	4a - CD14+ Mono	ACCS	2.95669e-12	0.0807072	0.067	0.015	6.40951e-08	up
CB3 vs HB3	4 - Mono	4a - CD14+ Mono	USP15	3.1227e-12	0.35048	0.746	0.578	6.76939e-08	up
CB3 vs HB3	4 - Mono	4a - CD14+ Mono	CORO7	3.94795e-12	0.340825	0.367	0.214	8.55838e-08	up
CB3 vs HB3	4 - Mono	4a - CD14+ Mono	RRN3	4.2717e-12	0.19225	0.151	0.06	9.26018e-08	up
CB3 vs HB3	4 - Mono	4a - CD14+ Mono	CALR	4.38449e-12	0.327281	0.48	0.301	9.50471e-08	up
CB3 vs HB3	4 - Mono	4a - CD14+ Mono	HBG1	4.70777e-12	-2.65697	0.002	0.097	1.02055e-07	down
CB3 vs HB3	4 - Mono	4a - CD14+ Mono	SUMF2	5.22679e-12	0.242515	0.21	0.096	1.13306e-07	up
CB3 vs HB3	4 - Mono	4a - CD14+ Mono	CLIP4	5.29882e-12	0.178997	0.138	0.053	1.14868e-07	up
CB3 vs HB3	4 - Mono	4a - CD14+ Mono	TNFSF10	5.41614e-12	0.386935	0.623	0.433	1.17411e-07	up
CB3 vs HB3	4 - Mono	4a - CD14+ Mono	WDFY2	5.61092e-12	0.363734	0.363	0.213	1.21634e-07	up
CB3 vs HB3	4 - Mono	4a - CD14+ Mono	SND1	5.70114e-12	0.265876	0.407	0.237	1.23589e-07	up
CB3 vs HB3	4 - Mono	4a - CD14+ Mono	CDK11A	5.87223e-12	0.287374	0.306	0.162	1.27298e-07	up
CB3 vs HB3	4 - Mono	4a - CD14+ Mono	AC119396.1	5.95007e-12	0.236479	0.193	0.087	1.28986e-07	up
CB3 vs HB3	4 - Mono	4a - CD14+ Mono	KDM5D	6.06368e-12	0.074392	0.042	0.006	1.31448e-07	up
CB3 vs HB3	4 - Mono	4a - CD14+ Mono	FKBP15	6.16198e-12	0.295841	0.436	0.266	1.33579e-07	up
CB3 vs HB3	4 - Mono	4a - CD14+ Mono	TMEM43	6.18779e-12	0.224763	0.239	0.116	1.34139e-07	up
CB3 vs HB3	4 - Mono	4a - CD14+ Mono	SRPRA	6.20585e-12	0.213314	0.369	0.205	1.3453e-07	up
CB3 vs HB3	4 - Mono	4a - CD14+ Mono	EXOSC5	6.43744e-12	0.191745	0.17	0.072	1.39551e-07	up
CB3 vs HB3	4 - Mono	4a - CD14+ Mono	ZC3HAV1	6.72222e-12	0.248395	0.365	0.208	1.45724e-07	up
CB3 vs HB3	4 - Mono	4a - CD14+ Mono	TBC1D23	6.89193e-12	0.210908	0.184	0.081	1.49403e-07	up
CB3 vs HB3	4 - Mono	4a - CD14+ Mono	MFSD14A	7.2582e-12	0.194619	0.168	0.07	1.57343e-07	up
CB3 vs HB3	4 - Mono	4a - CD14+ Mono	MRPS25	7.87442e-12	0.168783	0.218	0.102	1.70702e-07	up
CB3 vs HB3	4 - Mono	4a - CD14+ Mono	HSP90AB1	7.92215e-12	0.303857	0.751	0.56	1.71736e-07	up
CB3 vs HB3	4 - Mono	4a - CD14+ Mono	NOTCH2	8.04839e-12	0.301056	0.568	0.379	1.74473e-07	up
CB3 vs HB3	4 - Mono	4a - CD14+ Mono	CPM	8.14577e-12	0.173785	0.145	0.057	1.76584e-07	up
CB3 vs HB3	4 - Mono	4a - CD14+ Mono	MEF2C	8.78116e-12	0.279245	0.472	0.299	1.90358e-07	up
CB3 vs HB3	4 - Mono	4a - CD14+ Mono	SLC7A6	9.97618e-12	0.133688	0.126	0.046	2.16264e-07	up
CB3 vs HB3	4 - Mono	4a - CD14+ Mono	TNPO3	1.04933e-11	0.162003	0.187	0.082	2.27474e-07	up
CB3 vs HB3	4 - Mono	4a - CD14+ Mono	PABPC1	1.06161e-11	0.248599	0.96	0.942	2.30136e-07	up
CB3 vs HB3	4 - Mono	4a - CD14+ Mono	AATBC	1.25695e-11	0.185262	0.119	0.043	2.72481e-07	up
CB3 vs HB3	4 - Mono	4a - CD14+ Mono	SAMD9	1.2892e-11	0.16445	0.247	0.121	2.79472e-07	up
CB3 vs HB3	4 - Mono	4a - CD14+ Mono	MID1IP1	1.30804e-11	0.31254	0.342	0.195	2.83556e-07	up
CB3 vs HB3	4 - Mono	4a - CD14+ Mono	TRIM69	1.32544e-11	0.150892	0.157	0.065	2.87328e-07	up
CB3 vs HB3	4 - Mono	4a - CD14+ Mono	DDOST	1.33649e-11	0.262467	0.426	0.252	2.89725e-07	up
CB3 vs HB3	4 - Mono	4a - CD14+ Mono	DDX60	1.4304e-11	0.161812	0.117	0.041	3.10081e-07	up
CB3 vs HB3	4 - Mono	4a - CD14+ Mono	ZNF185	1.49568e-11	0.112698	0.103	0.033	3.24235e-07	up
CB3 vs HB3	4 - Mono	4a - CD14+ Mono	SLC40A1	1.82214e-11	0.232685	0.254	0.131	3.95004e-07	up
CB3 vs HB3	4 - Mono	4a - CD14+ Mono	PRPF4B	1.89429e-11	0.218236	0.373	0.213	4.10644e-07	up
CB3 vs HB3	4 - Mono	4a - CD14+ Mono	TUFM	2.38482e-11	0.212188	0.539	0.352	5.16981e-07	up
CB3 vs HB3	4 - Mono	4a - CD14+ Mono	CDK5RAP3	2.47918e-11	0.237294	0.411	0.242	5.37437e-07	up
CB3 vs HB3	4 - Mono	4a - CD14+ Mono	SHFL	2.52739e-11	0.212554	0.283	0.15	5.47888e-07	up
CB3 vs HB3	4 - Mono	4a - CD14+ Mono	DUSP1	2.54565e-11	-0.34207	0.816	0.861	5.51846e-07	down
CB3 vs HB3	4 - Mono	4a - CD14+ Mono	DPYD	2.62128e-11	0.336072	0.618	0.446	5.68241e-07	up
CB3 vs HB3	4 - Mono	4a - CD14+ Mono	WDR49	2.84174e-11	0.116179	0.101	0.033	6.16032e-07	up
CB3 vs HB3	4 - Mono	4a - CD14+ Mono	ERICH1	2.95139e-11	0.271655	0.539	0.345	6.39803e-07	up
CB3 vs HB3	4 - Mono	4a - CD14+ Mono	ZRANB2	3.07957e-11	0.261674	0.268	0.14	6.6759e-07	up
CB3 vs HB3	4 - Mono	4a - CD14+ Mono	DDX10	3.23771e-11	0.0980226	0.082	0.024	7.0187e-07	up
CB3 vs HB3	4 - Mono	4a - CD14+ Mono	NAGK	4.38755e-11	0.316725	0.637	0.441	9.51133e-07	up
CB3 vs HB3	4 - Mono	4a - CD14+ Mono	SIRPB1	4.47778e-11	0.22927	0.417	0.254	9.70694e-07	up
CB3 vs HB3	4 - Mono	4a - CD14+ Mono	SDHD	4.4847e-11	0.272814	0.39	0.24	9.72194e-07	up
CB3 vs HB3	4 - Mono	4a - CD14+ Mono	SLC31A1	4.48696e-11	0.207887	0.229	0.113	9.72684e-07	up
CB3 vs HB3	4 - Mono	4a - CD14+ Mono	APOL6	4.60867e-11	0.320479	0.308	0.17	9.99068e-07	up
CB3 vs HB3	4 - Mono	4a - CD14+ Mono	RNPC3	4.81414e-11	0.210382	0.277	0.144	1.04361e-06	up
CB3 vs HB3	4 - Mono	4a - CD14+ Mono	NR1H2	5.11745e-11	0.244087	0.419	0.25	1.10936e-06	up
CB3 vs HB3	4 - Mono	4a - CD14+ Mono	ANKFY1	6.45299e-11	0.149698	0.21	0.099	1.39888e-06	up
CB3 vs HB3	4 - Mono	4a - CD14+ Mono	LILRA1	6.584e-11	0.223372	0.438	0.27	1.42728e-06	up
CB3 vs HB3	4 - Mono	4a - CD14+ Mono	STAT1	6.93685e-11	0.335178	0.476	0.31	1.50377e-06	up
CB3 vs HB3	4 - Mono	4a - CD14+ Mono	FUOM	6.99265e-11	0.211112	0.321	0.179	1.51587e-06	up
CB3 vs HB3	4 - Mono	4a - CD14+ Mono	MCTP1	7.15727e-11	0.197383	0.344	0.193	1.55155e-06	up
CB3 vs HB3	4 - Mono	4a - CD14+ Mono	ZNFX1	7.38965e-11	0.245309	0.273	0.146	1.60193e-06	up
CB3 vs HB3	4 - Mono	4a - CD14+ Mono	SLC38A7	7.39171e-11	0.175231	0.099	0.033	1.60238e-06	up
CB3 vs HB3	4 - Mono	4a - CD14+ Mono	PTGER4	7.65454e-11	0.234462	0.187	0.087	1.65935e-06	up
CB3 vs HB3	4 - Mono	4a - CD14+ Mono	CARD16	7.69586e-11	0.312312	0.839	0.678	1.66831e-06	up
CB3 vs HB3	4 - Mono	4a - CD14+ Mono	SNX29	7.94058e-11	0.22912	0.252	0.132	1.72136e-06	up
CB3 vs HB3	4 - Mono	4a - CD14+ Mono	APEX1	8.31176e-11	0.279602	0.373	0.223	1.80182e-06	up
CB3 vs HB3	4 - Mono	4a - CD14+ Mono	INPP5D	9.66558e-11	0.269888	0.394	0.24	2.0953e-06	up
CB3 vs HB3	4 - Mono	4a - CD14+ Mono	ALKBH7	1.21731e-10	-0.505785	0.405	0.494	2.63889e-06	down
CB3 vs HB3	4 - Mono	4a - CD14+ Mono	MRPL23	1.21768e-10	-0.413166	0.04	0.143	2.63968e-06	down
CB3 vs HB3	4 - Mono	4a - CD14+ Mono	ANKRD12	1.22471e-10	0.223094	0.434	0.265	2.65493e-06	up
CB3 vs HB3	4 - Mono	4a - CD14+ Mono	SULF2	1.22689e-10	0.218692	0.361	0.205	2.65966e-06	up
CB3 vs HB3	4 - Mono	4a - CD14+ Mono	ZNF506	1.29428e-10	0.11802	0.099	0.033	2.80574e-06	up
CB3 vs HB3	4 - Mono	4a - CD14+ Mono	SHISA5	1.32194e-10	0.243599	0.474	0.3	2.8657e-06	up
CB3 vs HB3	4 - Mono	4a - CD14+ Mono	HIST1H4C	1.34448e-10	0.27562	0.312	0.177	2.91456e-06	up
CB3 vs HB3	4 - Mono	4a - CD14+ Mono	SERINC1	1.37582e-10	0.182257	0.352	0.201	2.9825e-06	up
CB3 vs HB3	4 - Mono	4a - CD14+ Mono	ARHGEF10L	1.50071e-10	0.225675	0.235	0.121	3.25325e-06	up
CB3 vs HB3	4 - Mono	4a - CD14+ Mono	ZDHHC1	1.54706e-10	0.11086	0.099	0.033	3.35372e-06	up
CB3 vs HB3	4 - Mono	4a - CD14+ Mono	CMTR1	1.5947e-10	0.186928	0.132	0.053	3.45699e-06	up
CB3 vs HB3	4 - Mono	4a - CD14+ Mono	NBN	1.60318e-10	0.217394	0.308	0.17	3.47537e-06	up
CB3 vs HB3	4 - Mono	4a - CD14+ Mono	CCPG1	1.62273e-10	0.179167	0.403	0.243	3.51776e-06	up
CB3 vs HB3	4 - Mono	4a - CD14+ Mono	CSNK1D	1.65248e-10	0.266079	0.428	0.265	3.58224e-06	up
CB3 vs HB3	4 - Mono	4a - CD14+ Mono	SNHG8	1.78851e-10	0.239527	0.298	0.165	3.87713e-06	up
CB3 vs HB3	4 - Mono	4a - CD14+ Mono	MTLN	1.82372e-10	0.200313	0.212	0.105	3.95345e-06	up
CB3 vs HB3	4 - Mono	4a - CD14+ Mono	RSRC1	1.90861e-10	0.166884	0.22	0.108	4.13749e-06	up
CB3 vs HB3	4 - Mono	4a - CD14+ Mono	NKG7	1.91572e-10	-0.497735	0.117	0.236	4.1529e-06	down
CB3 vs HB3	4 - Mono	4a - CD14+ Mono	BTN3A1	1.98892e-10	0.192684	0.113	0.043	4.31157e-06	up
CB3 vs HB3	4 - Mono	4a - CD14+ Mono	CLEC2B	2.07242e-10	0.253191	0.344	0.203	4.49258e-06	up
CB3 vs HB3	4 - Mono	4a - CD14+ Mono	NDE1	2.08748e-10	0.222318	0.296	0.164	4.52525e-06	up
CB3 vs HB3	4 - Mono	4a - CD14+ Mono	MIS18BP1	2.12011e-10	0.267907	0.474	0.304	4.59597e-06	up
CB3 vs HB3	4 - Mono	4a - CD14+ Mono	S100A4	2.13617e-10	-0.184689	0.985	0.993	4.63079e-06	down
CB3 vs HB3	4 - Mono	4a - CD14+ Mono	CIITA	2.26622e-10	0.276301	0.262	0.14	4.91271e-06	up
CB3 vs HB3	4 - Mono	4a - CD14+ Mono	CSF1R	2.27822e-10	0.323077	0.491	0.32	4.93872e-06	up
CB3 vs HB3	4 - Mono	4a - CD14+ Mono	RAB3GAP1	2.28683e-10	0.220472	0.222	0.113	4.95739e-06	up
CB3 vs HB3	4 - Mono	4a - CD14+ Mono	ATF5	2.29194e-10	0.263839	0.27	0.147	4.96848e-06	up
CB3 vs HB3	4 - Mono	4a - CD14+ Mono	COMMD10	2.40897e-10	0.179861	0.197	0.094	5.22217e-06	up
CB3 vs HB3	4 - Mono	4a - CD14+ Mono	CARS2	2.46794e-10	0.232975	0.388	0.235	5.35001e-06	up
CB3 vs HB3	4 - Mono	4a - CD14+ Mono	TNNT1	2.59632e-10	-0.472042	0.084	0.205	5.6283e-06	down
CB3 vs HB3	4 - Mono	4a - CD14+ Mono	TAP2	2.64793e-10	0.248308	0.258	0.137	5.74017e-06	up
CB3 vs HB3	4 - Mono	4a - CD14+ Mono	CANX	2.8066e-10	0.376815	0.606	0.42	6.08416e-06	up
CB3 vs HB3	4 - Mono	4a - CD14+ Mono	SUSD6	2.96498e-10	0.149844	0.245	0.126	6.42748e-06	up
CB3 vs HB3	4 - Mono	4a - CD14+ Mono	HERC5	3.21901e-10	0.148815	0.136	0.056	6.97817e-06	up
CB3 vs HB3	4 - Mono	4a - CD14+ Mono	IFI35	3.27706e-10	0.199219	0.436	0.267	7.10401e-06	up
CB3 vs HB3	4 - Mono	4a - CD14+ Mono	UBE2Z	3.28178e-10	0.171844	0.205	0.099	7.11424e-06	up
CB3 vs HB3	4 - Mono	4a - CD14+ Mono	CD300LF	3.52551e-10	0.231429	0.331	0.192	7.6426e-06	up
CB3 vs HB3	4 - Mono	4a - CD14+ Mono	AC004687.1	3.64292e-10	0.293651	0.344	0.206	7.89713e-06	up
CB3 vs HB3	4 - Mono	4a - CD14+ Mono	UBAC2	3.76206e-10	0.204827	0.289	0.161	8.1554e-06	up
CB3 vs HB3	4 - Mono	4a - CD14+ Mono	ARL2	3.84849e-10	0.168459	0.201	0.098	8.34275e-06	up
CB3 vs HB3	4 - Mono	4a - CD14+ Mono	ZC3H11A	3.99344e-10	0.0904279	0.109	0.04	8.65699e-06	up
CB3 vs HB3	4 - Mono	4a - CD14+ Mono	CRY2	4.02502e-10	0.151227	0.119	0.046	8.72543e-06	up
CB3 vs HB3	4 - Mono	4a - CD14+ Mono	THRAP3	4.14385e-10	0.213474	0.451	0.277	8.98303e-06	up
CB3 vs HB3	4 - Mono	4a - CD14+ Mono	TPP1	4.20892e-10	0.30963	0.537	0.363	9.1241e-06	up
CB3 vs HB3	4 - Mono	4a - CD14+ Mono	SRSF7	4.25e-10	0.32981	0.526	0.355	9.21314e-06	up
CB3 vs HB3	4 - Mono	4a - CD14+ Mono	SCAND1	4.3988e-10	-0.449532	0.577	0.631	9.53571e-06	down
CB3 vs HB3	4 - Mono	4a - CD14+ Mono	CD46	4.46914e-10	0.267145	0.474	0.3	9.6882e-06	up
CB3 vs HB3	4 - Mono	4a - CD14+ Mono	SEC31A	4.72833e-10	0.268902	0.358	0.211	1.02501e-05	up
CB3 vs HB3	4 - Mono	4a - CD14+ Mono	PNISR	4.73673e-10	0.241256	0.583	0.399	1.02683e-05	up
CB3 vs HB3	4 - Mono	4a - CD14+ Mono	HELZ2	4.73674e-10	0.16452	0.159	0.071	1.02683e-05	up
CB3 vs HB3	4 - Mono	4a - CD14+ Mono	PNN	4.74301e-10	0.262613	0.375	0.232	1.02819e-05	up
CB3 vs HB3	4 - Mono	4a - CD14+ Mono	WSB1	4.75452e-10	0.355012	0.65	0.477	1.03068e-05	up
CB3 vs HB3	4 - Mono	4a - CD14+ Mono	SOCS3	5.46054e-10	-0.627781	0.193	0.314	1.18374e-05	down
CB3 vs HB3	4 - Mono	4a - CD14+ Mono	KMT2E	6.04017e-10	0.205887	0.56	0.376	1.30939e-05	up
CB3 vs HB3	4 - Mono	4a - CD14+ Mono	FAM162A	6.08575e-10	0.145672	0.136	0.057	1.31927e-05	up
CB3 vs HB3	4 - Mono	4a - CD14+ Mono	COG5	6.1067e-10	0.188944	0.145	0.062	1.32381e-05	up
CB3 vs HB3	4 - Mono	4a - CD14+ Mono	AGPAT4	6.20115e-10	0.218879	0.182	0.087	1.34429e-05	up
CB3 vs HB3	4 - Mono	4a - CD14+ Mono	NT5C3A	6.2185e-10	0.14622	0.218	0.109	1.34805e-05	up
CB3 vs HB3	4 - Mono	4a - CD14+ Mono	TNFAIP8L2	6.27741e-10	0.226029	0.373	0.226	1.36082e-05	up
CB3 vs HB3	4 - Mono	4a - CD14+ Mono	TOPORS	6.44762e-10	0.144437	0.161	0.073	1.39772e-05	up
CB3 vs HB3	4 - Mono	4a - CD14+ Mono	MED24	6.64337e-10	0.107639	0.115	0.044	1.44015e-05	up
CB3 vs HB3	4 - Mono	4a - CD14+ Mono	TRIM56	6.74392e-10	0.222148	0.222	0.114	1.46195e-05	up
CB3 vs HB3	4 - Mono	4a - CD14+ Mono	CD164	6.75431e-10	0.248556	0.53	0.345	1.4642e-05	up
CB3 vs HB3	4 - Mono	4a - CD14+ Mono	ANTXR2	6.76957e-10	0.186125	0.283	0.155	1.46751e-05	up
CB3 vs HB3	4 - Mono	4a - CD14+ Mono	POGLUT1	7.04934e-10	0.1604	0.099	0.035	1.52816e-05	up
CB3 vs HB3	4 - Mono	4a - CD14+ Mono	IFIT1	7.07267e-10	0.257845	0.09	0.031	1.53321e-05	up
CB3 vs HB3	4 - Mono	4a - CD14+ Mono	ARL6IP4	7.98279e-10	-0.394683	0.514	0.591	1.73051e-05	down
CB3 vs HB3	4 - Mono	4a - CD14+ Mono	SCAF11	8.15692e-10	0.19568	0.587	0.401	1.76826e-05	up
CB3 vs HB3	4 - Mono	4a - CD14+ Mono	SNHG16	8.42562e-10	0.209039	0.329	0.192	1.82651e-05	up
CB3 vs HB3	4 - Mono	4a - CD14+ Mono	SP140L	8.74481e-10	0.163442	0.189	0.091	1.8957e-05	up
CB3 vs HB3	4 - Mono	4a - CD14+ Mono	SMG1	8.97978e-10	0.208516	0.388	0.235	1.94664e-05	up
CB3 vs HB3	4 - Mono	4a - CD14+ Mono	ABI3	9.21372e-10	0.236948	0.317	0.181	1.99735e-05	up
CB3 vs HB3	4 - Mono	4a - CD14+ Mono	DNAJB12	9.59316e-10	0.204838	0.333	0.192	2.07961e-05	up
CB3 vs HB3	4 - Mono	4a - CD14+ Mono	MBNL1	1.01161e-09	0.212014	0.759	0.584	2.19297e-05	up
CB3 vs HB3	4 - Mono	4a - CD14+ Mono	HSPA5	1.0353e-09	0.419224	0.47	0.317	2.24432e-05	up
CB3 vs HB3	4 - Mono	4a - CD14+ Mono	LILRA2	1.04788e-09	0.292598	0.585	0.429	2.27159e-05	up
CB3 vs HB3	4 - Mono	4a - CD14+ Mono	BATF2	1.05371e-09	0.0567732	0.019	0.001	2.28424e-05	up
CB3 vs HB3	4 - Mono	4a - CD14+ Mono	PIAS1	1.09605e-09	0.210253	0.384	0.232	2.37602e-05	up
CB3 vs HB3	4 - Mono	4a - CD14+ Mono	NAA60	1.15844e-09	0.176384	0.205	0.104	2.51127e-05	up
CB3 vs HB3	4 - Mono	4a - CD14+ Mono	RPL8	1.17022e-09	-0.190877	0.979	0.988	2.53679e-05	down
CB3 vs HB3	4 - Mono	4a - CD14+ Mono	GPNMB	1.21631e-09	0.0431866	0.013	0	2.63672e-05	up
CB3 vs HB3	4 - Mono	4a - CD14+ Mono	RASA4	1.22649e-09	0.172033	0.176	0.084	2.65879e-05	up
CB3 vs HB3	4 - Mono	4a - CD14+ Mono	NEDD9	1.23782e-09	0.198088	0.273	0.15	2.68334e-05	up
CB3 vs HB3	4 - Mono	4a - CD14+ Mono	MS4A6A	1.28809e-09	0.269796	0.91	0.846	2.79231e-05	up
CB3 vs HB3	4 - Mono	4a - CD14+ Mono	TNFSF8	1.35159e-09	0.0753103	0.168	0.076	2.92998e-05	up
CB3 vs HB3	4 - Mono	4a - CD14+ Mono	AOPEP	1.36194e-09	0.069402	0.031	0.004	2.95241e-05	up
CB3 vs HB3	4 - Mono	4a - CD14+ Mono	NKTR	1.39447e-09	0.24237	0.377	0.232	3.02292e-05	up
CB3 vs HB3	4 - Mono	4a - CD14+ Mono	IFIH1	1.40104e-09	0.117212	0.128	0.052	3.03718e-05	up
CB3 vs HB3	4 - Mono	4a - CD14+ Mono	ISG15	1.40658e-09	0.392878	0.436	0.292	3.04919e-05	up
CB3 vs HB3	4 - Mono	4a - CD14+ Mono	ZEB2	1.42547e-09	0.363441	0.824	0.672	3.09012e-05	up
CB3 vs HB3	4 - Mono	4a - CD14+ Mono	TMEM14C	1.43567e-09	0.20904	0.423	0.265	3.11226e-05	up
CB3 vs HB3	4 - Mono	4a - CD14+ Mono	EIF2AK2	1.46962e-09	0.226042	0.296	0.168	3.18585e-05	up
CB3 vs HB3	4 - Mono	4a - CD14+ Mono	DDIT4	1.4814e-09	0.314023	0.145	0.065	3.21139e-05	up
CB3 vs HB3	4 - Mono	4a - CD14+ Mono	TMED10	1.51486e-09	0.187894	0.451	0.283	3.2839e-05	up
CB3 vs HB3	4 - Mono	4a - CD14+ Mono	LAPTM5	1.59396e-09	0.203327	0.958	0.904	3.45538e-05	up
CB3 vs HB3	4 - Mono	4a - CD14+ Mono	C5orf56	1.61089e-09	0.102526	0.124	0.05	3.49208e-05	up
CB3 vs HB3	4 - Mono	4a - CD14+ Mono	PPARGC1B	1.64505e-09	0.143225	0.092	0.032	3.56613e-05	up
CB3 vs HB3	4 - Mono	4a - CD14+ Mono	TENT5A	1.66734e-09	0.188735	0.235	0.125	3.61447e-05	up
CB3 vs HB3	4 - Mono	4a - CD14+ Mono	PFDN1	1.67357e-09	0.132038	0.262	0.141	3.62797e-05	up
CB3 vs HB3	4 - Mono	4a - CD14+ Mono	VPS13C	1.72788e-09	0.202421	0.528	0.356	3.7457e-05	up
CB3 vs HB3	4 - Mono	4a - CD14+ Mono	CD52	1.7279e-09	0.373363	0.795	0.699	3.74574e-05	up
CB3 vs HB3	4 - Mono	4a - CD14+ Mono	WASHC4	1.76482e-09	0.256894	0.447	0.287	3.82577e-05	up
CB3 vs HB3	4 - Mono	4a - CD14+ Mono	COPG1	1.81349e-09	0.153132	0.224	0.116	3.93128e-05	up
CB3 vs HB3	4 - Mono	4a - CD14+ Mono	ISG20	1.82764e-09	0.17326	0.145	0.063	3.96195e-05	up
CB3 vs HB3	4 - Mono	4a - CD14+ Mono	TSPAN4	1.92954e-09	0.199497	0.172	0.082	4.18286e-05	up
CB3 vs HB3	4 - Mono	4a - CD14+ Mono	PDXDC1	2.02948e-09	0.162923	0.147	0.065	4.39952e-05	up
CB3 vs HB3	4 - Mono	4a - CD14+ Mono	DTX2	2.28338e-09	0.106275	0.189	0.091	4.94992e-05	up
CB3 vs HB3	4 - Mono	4a - CD14+ Mono	ATP6AP2	2.34231e-09	0.294216	0.522	0.359	5.07765e-05	up
CB3 vs HB3	4 - Mono	4a - CD14+ Mono	NPC2	2.36475e-09	0.2236	0.86	0.753	5.1263e-05	up
CB3 vs HB3	4 - Mono	4a - CD14+ Mono	ICAM2	2.36595e-09	0.210116	0.277	0.156	5.12891e-05	up
CB3 vs HB3	4 - Mono	4a - CD14+ Mono	DLG1	2.38711e-09	0.15627	0.126	0.052	5.17479e-05	up
CB3 vs HB3	4 - Mono	4a - CD14+ Mono	PPT1	2.42828e-09	0.280632	0.66	0.49	5.26404e-05	up
CB3 vs HB3	4 - Mono	4a - CD14+ Mono	JTB	2.51511e-09	-0.475851	0.417	0.505	5.45225e-05	down
CB3 vs HB3	4 - Mono	4a - CD14+ Mono	FGR	2.55875e-09	0.265747	0.866	0.763	5.54686e-05	up
CB3 vs HB3	4 - Mono	4a - CD14+ Mono	NCOA3	2.71434e-09	0.178064	0.323	0.188	5.88415e-05	up
CB3 vs HB3	4 - Mono	4a - CD14+ Mono	PHIP	2.7626e-09	0.233636	0.415	0.264	5.98876e-05	up
CB3 vs HB3	4 - Mono	4a - CD14+ Mono	ERP44	2.86575e-09	0.182776	0.34	0.202	6.21237e-05	up
CB3 vs HB3	4 - Mono	4a - CD14+ Mono	SIGLEC1	2.95803e-09	0.208925	0.115	0.047	6.41241e-05	up
CB3 vs HB3	4 - Mono	4a - CD14+ Mono	RNF13	2.99079e-09	0.190566	0.482	0.316	6.48343e-05	up
CB3 vs HB3	4 - Mono	4a - CD14+ Mono	FAM133B	3.00183e-09	0.174011	0.264	0.146	6.50737e-05	up
CB3 vs HB3	4 - Mono	4a - CD14+ Mono	RPS4X	3.02418e-09	-0.221719	0.977	0.976	6.55581e-05	down
CB3 vs HB3	4 - Mono	4a - CD14+ Mono	TTC17	3.04684e-09	0.162669	0.27	0.15	6.60494e-05	up
CB3 vs HB3	4 - Mono	4a - CD14+ Mono	TOM1	3.07562e-09	0.203194	0.507	0.341	6.66732e-05	up
CB3 vs HB3	4 - Mono	4a - CD14+ Mono	CIR1	3.12023e-09	0.170682	0.354	0.212	6.76403e-05	up
CB3 vs HB3	4 - Mono	4a - CD14+ Mono	INKA2	3.12516e-09	0.144041	0.126	0.052	6.77473e-05	up
CB3 vs HB3	4 - Mono	4a - CD14+ Mono	MT-ND5	3.16678e-09	0.321478	0.929	0.861	6.86495e-05	up
CB3 vs HB3	4 - Mono	4a - CD14+ Mono	RNF114	3.26671e-09	0.20392	0.386	0.233	7.08157e-05	up
CB3 vs HB3	4 - Mono	4a - CD14+ Mono	SCIMP	3.2687e-09	0.169224	0.4	0.244	7.08589e-05	up
CB3 vs HB3	4 - Mono	4a - CD14+ Mono	ECD	3.48763e-09	0.132795	0.166	0.077	7.56048e-05	up
CB3 vs HB3	4 - Mono	4a - CD14+ Mono	M6PR	3.69016e-09	0.237668	0.48	0.314	7.99953e-05	up
CB3 vs HB3	4 - Mono	4a - CD14+ Mono	LPP	3.87459e-09	0.190377	0.266	0.147	8.39933e-05	up
CB3 vs HB3	4 - Mono	4a - CD14+ Mono	H3F3B	4.02012e-09	-0.256619	0.969	0.974	8.71481e-05	down
CB3 vs HB3	4 - Mono	4a - CD14+ Mono	HERPUD1	4.1018e-09	0.29507	0.518	0.357	8.89189e-05	up
CB3 vs HB3	4 - Mono	4a - CD14+ Mono	RPS9	4.12781e-09	-0.186443	0.985	0.98	8.94827e-05	down
CB3 vs HB3	4 - Mono	4a - CD14+ Mono	C9orf78	4.20194e-09	0.173085	0.442	0.281	9.10896e-05	up
CB3 vs HB3	4 - Mono	4a - CD14+ Mono	NFKBIA	4.21566e-09	-0.48817	0.73	0.761	9.13871e-05	down
CB3 vs HB3	4 - Mono	4a - CD14+ Mono	TJP2	4.24494e-09	0.112825	0.099	0.037	9.20217e-05	up
CB3 vs HB3	4 - Mono	4a - CD14+ Mono	AAMP	4.46144e-09	0.216066	0.386	0.238	9.6715e-05	up
CB3 vs HB3	4 - Mono	4a - CD14+ Mono	PDIA6	4.54321e-09	0.317269	0.327	0.199	9.84878e-05	up
CB3 vs HB3	4 - Mono	4a - CD14+ Mono	SAMD9L	4.60132e-09	0.225676	0.245	0.134	9.97473e-05	up
CB3 vs HB3	4 - Mono	4a - CD14+ Mono	ARID2	4.80316e-09	0.115864	0.145	0.065	0.000104123	up
CB3 vs HB3	4 - Mono	4a - CD14+ Mono	RBM5	4.8183e-09	0.217627	0.377	0.235	0.000104451	up
CB3 vs HB3	4 - Mono	4a - CD14+ Mono	FDPS	4.87922e-09	0.165185	0.298	0.168	0.000105772	up
CB3 vs HB3	4 - Mono	4a - CD14+ Mono	CD300A	4.89706e-09	0.23869	0.39	0.248	0.000106159	up
CB3 vs HB3	4 - Mono	4a - CD14+ Mono	DNMT3A	5.09262e-09	0.112435	0.063	0.018	0.000110398	up
CB3 vs HB3	4 - Mono	4a - CD14+ Mono	SPOP	5.2863e-09	0.201422	0.287	0.164	0.000114596	up
CB3 vs HB3	4 - Mono	4a - CD14+ Mono	PPP1R10	5.30933e-09	0.176328	0.306	0.179	0.000115096	up
CB3 vs HB3	4 - Mono	4a - CD14+ Mono	DNAJB6	5.49776e-09	0.212244	0.451	0.287	0.00011918	up
CB3 vs HB3	4 - Mono	4a - CD14+ Mono	SLC31A2	5.62617e-09	0.246902	0.482	0.327	0.000121964	up
CB3 vs HB3	4 - Mono	4a - CD14+ Mono	DAPP1	5.70369e-09	0.198029	0.419	0.266	0.000123645	up
CB3 vs HB3	4 - Mono	4a - CD14+ Mono	TRA2A	5.79549e-09	0.149144	0.407	0.249	0.000125635	up
CB3 vs HB3	4 - Mono	4a - CD14+ Mono	PIM1	5.80168e-09	-0.479298	0.094	0.195	0.000125769	down
CB3 vs HB3	4 - Mono	4a - CD14+ Mono	PRPF8	5.97037e-09	0.224324	0.386	0.246	0.000129426	up
CB3 vs HB3	4 - Mono	4a - CD14+ Mono	TRIB1	6.05359e-09	-0.528464	0.164	0.269	0.00013123	down
CB3 vs HB3	4 - Mono	4a - CD14+ Mono	NUDC	6.15052e-09	0.206689	0.396	0.249	0.000133331	up
CB3 vs HB3	4 - Mono	4a - CD14+ Mono	HNRNPR	6.29156e-09	0.202956	0.413	0.262	0.000136388	up
CB3 vs HB3	4 - Mono	4a - CD14+ Mono	CTSA	6.45758e-09	0.224044	0.549	0.373	0.000139987	up
CB3 vs HB3	4 - Mono	4a - CD14+ Mono	KCTD7	6.52123e-09	0.0805568	0.065	0.019	0.000141367	up
CB3 vs HB3	4 - Mono	4a - CD14+ Mono	IMPDH2	6.52897e-09	0.138367	0.18	0.089	0.000141535	up
CB3 vs HB3	4 - Mono	4a - CD14+ Mono	TMUB2	6.5902e-09	0.206509	0.245	0.136	0.000142862	up
CB3 vs HB3	4 - Mono	4a - CD14+ Mono	C16orf54	6.60307e-09	0.179159	0.249	0.137	0.000143141	up
CB3 vs HB3	4 - Mono	4a - CD14+ Mono	GPBAR1	6.72745e-09	0.271178	0.398	0.258	0.000145838	up
CB3 vs HB3	4 - Mono	4a - CD14+ Mono	TYMP	7.21371e-09	-0.324793	0.608	0.666	0.000156379	down
CB3 vs HB3	4 - Mono	4a - CD14+ Mono	CLK1	7.28403e-09	0.190053	0.325	0.192	0.000157903	up
CB3 vs HB3	4 - Mono	4a - CD14+ Mono	EEF2	7.37924e-09	0.275786	0.904	0.854	0.000159967	up
CB3 vs HB3	4 - Mono	4a - CD14+ Mono	KCNMB1	7.41525e-09	0.118787	0.084	0.029	0.000160748	up
CB3 vs HB3	4 - Mono	4a - CD14+ Mono	DDX24	7.41557e-09	0.195794	0.369	0.226	0.000160755	up
CB3 vs HB3	4 - Mono	4a - CD14+ Mono	SPIB	7.5159e-09	0.0726616	0.023	0.002	0.00016293	up
CB3 vs HB3	4 - Mono	4a - CD14+ Mono	RPS7	7.59602e-09	-0.181648	0.981	0.983	0.000164666	down
CB3 vs HB3	4 - Mono	4a - CD14+ Mono	RPTOR	7.87484e-09	0.1097	0.094	0.035	0.000170711	up
CB3 vs HB3	4 - Mono	4a - CD14+ Mono	ELMO1	8.07984e-09	0.169421	0.287	0.166	0.000175155	up
CB3 vs HB3	4 - Mono	4a - CD14+ Mono	GLB1	8.23317e-09	0.249356	0.283	0.167	0.000178479	up
CB3 vs HB3	4 - Mono	4a - CD14+ Mono	ABCC4	8.27462e-09	0.0786237	0.055	0.014	0.000179377	up
CB3 vs HB3	4 - Mono	4a - CD14+ Mono	GIMAP7	8.70838e-09	0.225188	0.539	0.36	0.00018878	up
CB3 vs HB3	4 - Mono	4a - CD14+ Mono	SIK1B	8.93788e-09	0.148207	0.069	0.022	0.000193755	up
CB3 vs HB3	4 - Mono	4a - CD14+ Mono	HSH2D	8.97944e-09	0.159002	0.239	0.13	0.000194656	up
CB3 vs HB3	4 - Mono	4a - CD14+ Mono	SIGLEC10	8.98007e-09	0.180778	0.193	0.098	0.00019467	up
CB3 vs HB3	4 - Mono	4a - CD14+ Mono	LINC02723	9.09275e-09	0.186697	0.145	0.066	0.000197113	up
CB3 vs HB3	4 - Mono	4a - CD14+ Mono	NDUFB2	9.15586e-09	0.239117	0.746	0.586	0.000198481	up
CB3 vs HB3	4 - Mono	4a - CD14+ Mono	MATR3.1	9.16816e-09	0.14032	0.277	0.157	0.000198747	up
CB3 vs HB3	4 - Mono	4a - CD14+ Mono	CSRP1	9.40682e-09	0.127501	0.237	0.127	0.000203921	up
CB3 vs HB3	4 - Mono	4a - CD14+ Mono	OASL	9.4562e-09	0.261096	0.164	0.08	0.000204991	up
CB3 vs HB3	4 - Mono	4a - CD14+ Mono	KLHL24	9.82298e-09	0.161261	0.193	0.099	0.000212942	up
CB3 vs HB3	4 - Mono	4a - CD14+ Mono	TSPAN32	9.89124e-09	0.296357	0.252	0.142	0.000214422	up
CB3 vs HB3	4 - Mono	4a - CD14+ Mono	MAT2A	9.93838e-09	0.299696	0.294	0.176	0.000215444	up
CB3 vs HB3	4 - Mono	4a - CD14+ Mono	HSPH1	1.00531e-08	0.166327	0.13	0.057	0.000217931	up
CB3 vs HB3	4 - Mono	4a - CD14+ Mono	PHKB	1.01904e-08	0.121574	0.281	0.155	0.000220908	up
CB3 vs HB3	4 - Mono	4a - CD14+ Mono	PER1	1.04224e-08	0.219185	0.321	0.193	0.000225937	up
CB3 vs HB3	4 - Mono	4a - CD14+ Mono	STX16	1.04516e-08	0.171834	0.331	0.196	0.000226569	up
CB3 vs HB3	4 - Mono	4a - CD14+ Mono	PARP9	1.05719e-08	0.211734	0.3	0.178	0.000229177	up
CB3 vs HB3	4 - Mono	4a - CD14+ Mono	TMEM126B	1.07557e-08	0.159173	0.164	0.079	0.000233161	up
CB3 vs HB3	4 - Mono	4a - CD14+ Mono	SAMHD1	1.10237e-08	0.267156	0.906	0.818	0.000238971	up
CB3 vs HB3	4 - Mono	4a - CD14+ Mono	PILRA	1.1148e-08	0.208848	0.667	0.485	0.000241667	up
CB3 vs HB3	4 - Mono	4a - CD14+ Mono	ADAM15	1.14666e-08	0.17992	0.331	0.199	0.000248572	up
CB3 vs HB3	4 - Mono	4a - CD14+ Mono	ETV3	1.16312e-08	0.238838	0.176	0.088	0.000252141	up
CB3 vs HB3	4 - Mono	4a - CD14+ Mono	TMEM268	1.17734e-08	0.130612	0.096	0.037	0.000255224	up
CB3 vs HB3	4 - Mono	4a - CD14+ Mono	AP3B1	1.20099e-08	0.207665	0.352	0.212	0.000260351	up
CB3 vs HB3	4 - Mono	4a - CD14+ Mono	PDHA1	1.26531e-08	0.165661	0.189	0.096	0.000274294	up
CB3 vs HB3	4 - Mono	4a - CD14+ Mono	PPP5C	1.32241e-08	0.114185	0.117	0.049	0.000286672	up
CB3 vs HB3	4 - Mono	4a - CD14+ Mono	MPP7	1.33019e-08	0.165153	0.203	0.107	0.000288358	up
CB3 vs HB3	4 - Mono	4a - CD14+ Mono	NR3C1	1.34475e-08	0.153598	0.39	0.241	0.000291515	up
CB3 vs HB3	4 - Mono	4a - CD14+ Mono	CXCR4	1.36667e-08	0.313333	0.26	0.152	0.000296266	up
CB3 vs HB3	4 - Mono	4a - CD14+ Mono	RHBDF2	1.37886e-08	0.238136	0.224	0.122	0.000298909	up
CB3 vs HB3	4 - Mono	4a - CD14+ Mono	CD53	1.38543e-08	0.234593	0.66	0.493	0.000300333	up
CB3 vs HB3	4 - Mono	4a - CD14+ Mono	PRKDC	1.41195e-08	0.173639	0.291	0.169	0.000306082	up
CB3 vs HB3	4 - Mono	4a - CD14+ Mono	CCDC12	1.41708e-08	0.180547	0.434	0.274	0.000307194	up
CB3 vs HB3	4 - Mono	4a - CD14+ Mono	CTNND1	1.42098e-08	0.13215	0.187	0.094	0.00030804	up
CB3 vs HB3	4 - Mono	4a - CD14+ Mono	FAM135A	1.44715e-08	0.0872644	0.096	0.037	0.000313713	up
CB3 vs HB3	4 - Mono	4a - CD14+ Mono	GOLGA4	1.49499e-08	0.203799	0.323	0.195	0.000324085	up
CB3 vs HB3	4 - Mono	4a - CD14+ Mono	CTSH	1.50758e-08	0.255581	0.717	0.555	0.000326814	up
CB3 vs HB3	4 - Mono	4a - CD14+ Mono	PSME1	1.52777e-08	0.265825	0.851	0.746	0.00033119	up
CB3 vs HB3	4 - Mono	4a - CD14+ Mono	APPBP2	1.56458e-08	0.148127	0.138	0.063	0.00033917	up
CB3 vs HB3	4 - Mono	4a - CD14+ Mono	CRTAM	1.57433e-08	0.0525302	0.038	0.008	0.000341284	up
CB3 vs HB3	4 - Mono	4a - CD14+ Mono	NUP42	1.69751e-08	0.198187	0.176	0.089	0.000367987	up
CB3 vs HB3	4 - Mono	4a - CD14+ Mono	IL1B	1.79489e-08	-0.857663	0.384	0.475	0.000389097	down
CB3 vs HB3	4 - Mono	4a - CD14+ Mono	SPG11	1.80556e-08	0.242239	0.289	0.171	0.00039141	up
CB3 vs HB3	4 - Mono	4a - CD14+ Mono	AL135905.2	1.80762e-08	0.126038	0.145	0.067	0.000391857	up
CB3 vs HB3	4 - Mono	4a - CD14+ Mono	HSPD1	1.81007e-08	0.19709	0.346	0.213	0.000392386	up
CB3 vs HB3	4 - Mono	4a - CD14+ Mono	IL18	1.81411e-08	0.119486	0.124	0.054	0.000393263	up
CB3 vs HB3	4 - Mono	4a - CD14+ Mono	HCCS	1.82824e-08	0.190587	0.184	0.094	0.000396327	up
CB3 vs HB3	4 - Mono	4a - CD14+ Mono	ZNF280D	1.94092e-08	0.24579	0.182	0.093	0.000420752	up
CB3 vs HB3	4 - Mono	4a - CD14+ Mono	NCF1	2.00998e-08	0.437746	0.841	0.76	0.000435724	up
CB3 vs HB3	4 - Mono	4a - CD14+ Mono	ASF1A	2.04559e-08	0.0712352	0.107	0.043	0.000443443	up
CB3 vs HB3	4 - Mono	4a - CD14+ Mono	APOBEC3A	2.04906e-08	0.361011	0.484	0.335	0.000444196	up
CB3 vs HB3	4 - Mono	4a - CD14+ Mono	ZYX	2.08217e-08	-0.361713	0.623	0.644	0.000451373	down
CB3 vs HB3	4 - Mono	4a - CD14+ Mono	PDIA3	2.10453e-08	0.297637	0.459	0.311	0.000456219	up
CB3 vs HB3	4 - Mono	4a - CD14+ Mono	ARHGEF40	2.11469e-08	0.257215	0.325	0.202	0.000458424	up
CB3 vs HB3	4 - Mono	4a - CD14+ Mono	UBE2W	2.13759e-08	0.162472	0.268	0.154	0.000463386	up
CB3 vs HB3	4 - Mono	4a - CD14+ Mono	TMBIM6	2.16302e-08	0.252599	0.744	0.593	0.000468899	up
CB3 vs HB3	4 - Mono	4a - CD14+ Mono	TSTD2	2.17709e-08	0.0859554	0.055	0.015	0.00047195	up
CB3 vs HB3	4 - Mono	4a - CD14+ Mono	DLD	2.21079e-08	0.114263	0.208	0.108	0.000479256	up
CB3 vs HB3	4 - Mono	4a - CD14+ Mono	TGOLN2	2.21309e-08	0.224925	0.623	0.456	0.000479753	up
CB3 vs HB3	4 - Mono	4a - CD14+ Mono	THTPA	2.24855e-08	0.109962	0.092	0.035	0.00048744	up
CB3 vs HB3	4 - Mono	4a - CD14+ Mono	ANAPC5	2.3565e-08	0.240346	0.403	0.262	0.000510843	up
CB3 vs HB3	4 - Mono	4a - CD14+ Mono	GOLGB1	2.35904e-08	0.176564	0.333	0.199	0.000511393	up
CB3 vs HB3	4 - Mono	4a - CD14+ Mono	PCK2	2.36088e-08	0.163725	0.136	0.063	0.000511791	up
CB3 vs HB3	4 - Mono	4a - CD14+ Mono	NBAS	2.38937e-08	0.113372	0.138	0.063	0.000517968	up
CB3 vs HB3	4 - Mono	4a - CD14+ Mono	DNAJA1	2.41409e-08	0.192872	0.549	0.385	0.000523326	up
CB3 vs HB3	4 - Mono	4a - CD14+ Mono	MIA3	2.46587e-08	0.184742	0.222	0.121	0.000534551	up
CB3 vs HB3	4 - Mono	4a - CD14+ Mono	ZNF281	2.50751e-08	0.138627	0.187	0.094	0.000543578	up
CB3 vs HB3	4 - Mono	4a - CD14+ Mono	RBM39	2.58346e-08	0.27993	0.776	0.621	0.000560042	up
CB3 vs HB3	4 - Mono	4a - CD14+ Mono	LUC7L3	2.58412e-08	0.206074	0.413	0.271	0.000560186	up
CB3 vs HB3	4 - Mono	4a - CD14+ Mono	SERPINB1	2.58858e-08	-0.317583	0.834	0.84	0.000561153	down
CB3 vs HB3	4 - Mono	4a - CD14+ Mono	SMIM14	2.70955e-08	0.125432	0.321	0.188	0.000587377	up
CB3 vs HB3	4 - Mono	4a - CD14+ Mono	PLXDC2	2.72642e-08	0.226189	0.61	0.44	0.000591034	up
CB3 vs HB3	4 - Mono	4a - CD14+ Mono	HMGN1	2.76052e-08	0.232077	0.325	0.197	0.000598426	up
CB3 vs HB3	4 - Mono	4a - CD14+ Mono	LPCAT3	2.76297e-08	0.126201	0.138	0.063	0.000598957	up
CB3 vs HB3	4 - Mono	4a - CD14+ Mono	TTC14	2.78599e-08	0.154681	0.182	0.093	0.000603948	up
CB3 vs HB3	4 - Mono	4a - CD14+ Mono	ZNF292	2.80403e-08	0.110915	0.256	0.143	0.000607858	up
CB3 vs HB3	4 - Mono	4a - CD14+ Mono	ZNF638	2.84308e-08	0.183418	0.281	0.166	0.000616324	up
CB3 vs HB3	4 - Mono	4a - CD14+ Mono	CRLF3	2.86035e-08	0.166805	0.275	0.159	0.000620067	up
CB3 vs HB3	4 - Mono	4a - CD14+ Mono	RAB9A	2.86383e-08	0.143133	0.205	0.108	0.000620822	up
CB3 vs HB3	4 - Mono	4a - CD14+ Mono	PIK3R5	2.90457e-08	0.145156	0.302	0.178	0.000629653	up
CB3 vs HB3	4 - Mono	4a - CD14+ Mono	FAM111A	2.92476e-08	0.142327	0.287	0.169	0.00063403	up
CB3 vs HB3	4 - Mono	4a - CD14+ Mono	GMFG	3.02815e-08	-0.266612	0.891	0.877	0.000656441	down
CB3 vs HB3	4 - Mono	4a - CD14+ Mono	ABCA1	3.06612e-08	0.0855244	0.075	0.026	0.000664674	up
CB3 vs HB3	4 - Mono	4a - CD14+ Mono	RGCC	3.28965e-08	-0.53784	0.057	0.144	0.000713129	down
CB3 vs HB3	4 - Mono	4a - CD14+ Mono	IGHV4-34	3.29534e-08	0.391388	0.015	0.001	0.000714364	up
CB3 vs HB3	4 - Mono	4a - CD14+ Mono	IGLV7-46	3.39201e-08	0.0341578	0.015	0.001	0.00073532	up
CB3 vs HB3	4 - Mono	4a - CD14+ Mono	CNTRL	3.42245e-08	0.231735	0.273	0.159	0.000741919	up
CB3 vs HB3	4 - Mono	4a - CD14+ Mono	EPC1	3.43343e-08	0.218474	0.484	0.335	0.000744299	up
CB3 vs HB3	4 - Mono	4a - CD14+ Mono	SPATA20	3.53528e-08	0.0963058	0.13	0.058	0.000766379	up
CB3 vs HB3	4 - Mono	4a - CD14+ Mono	NR4A2	3.57187e-08	0.293617	0.39	0.264	0.00077431	up
CB3 vs HB3	4 - Mono	4a - CD14+ Mono	TBC1D2	3.57406e-08	0.171912	0.212	0.114	0.000774785	up
CB3 vs HB3	4 - Mono	4a - CD14+ Mono	TBP	3.74912e-08	0.141252	0.107	0.045	0.000812735	up
CB3 vs HB3	4 - Mono	4a - CD14+ Mono	THOC1	3.91113e-08	0.108879	0.092	0.036	0.000847855	up
CB3 vs HB3	4 - Mono	4a - CD14+ Mono	MBNL2	3.94465e-08	0.101218	0.122	0.053	0.000855121	up
CB3 vs HB3	4 - Mono	4a - CD14+ Mono	RBBP7	3.97262e-08	0.107524	0.184	0.094	0.000861184	up
CB3 vs HB3	4 - Mono	4a - CD14+ Mono	PRKRA	3.99365e-08	0.102603	0.143	0.067	0.000865743	up
CB3 vs HB3	4 - Mono	4a - CD14+ Mono	GPHN	4.03137e-08	0.0916736	0.052	0.014	0.000873921	up
CB3 vs HB3	4 - Mono	4a - CD14+ Mono	Z99127.4	4.25675e-08	0.146907	0.084	0.031	0.000922778	up
CB3 vs HB3	4 - Mono	4a - CD14+ Mono	LINC01765	4.39505e-08	0.0373185	0.013	0	0.000952759	up
CB3 vs HB3	4 - Mono	4a - CD14+ Mono	RIF1	4.48914e-08	0.128507	0.214	0.115	0.000973157	up
CB3 vs HB3	4 - Mono	4a - CD14+ Mono	TMEM109	4.61329e-08	0.138	0.155	0.076	0.00100007	up
CB3 vs HB3	4 - Mono	4a - CD14+ Mono	PLXNC1	4.65536e-08	0.113416	0.275	0.158	0.00100919	up
CB3 vs HB3	4 - Mono	4a - CD14+ Mono	STK4	4.96211e-08	0.199133	0.585	0.423	0.00107569	up
CB3 vs HB3	4 - Mono	4a - CD14+ Mono	ARL6IP6	5.08519e-08	0.131807	0.164	0.081	0.00110237	up
CB3 vs HB3	4 - Mono	4a - CD14+ Mono	CNIH1	5.10376e-08	0.197529	0.394	0.255	0.00110639	up
CB3 vs HB3	4 - Mono	4a - CD14+ Mono	SRSF1	5.20103e-08	0.15034	0.31	0.185	0.00112748	up
CB3 vs HB3	4 - Mono	4a - CD14+ Mono	TNFSF12	5.46493e-08	0.119602	0.105	0.044	0.00118469	up
CB3 vs HB3	4 - Mono	4a - CD14+ Mono	MAN2B1	5.47332e-08	0.282909	0.591	0.434	0.00118651	up
CB3 vs HB3	4 - Mono	4a - CD14+ Mono	TALDO1	5.49523e-08	-0.242146	0.899	0.884	0.00119126	down
CB3 vs HB3	4 - Mono	4a - CD14+ Mono	DIP2B	5.617e-08	0.162195	0.178	0.092	0.00121765	up
CB3 vs HB3	4 - Mono	4a - CD14+ Mono	CREBRF	5.62577e-08	0.158483	0.27	0.155	0.00121955	up
CB3 vs HB3	4 - Mono	4a - CD14+ Mono	PPIB	5.87351e-08	0.223771	0.78	0.657	0.00127326	up
[truncated: 3,174 more rows]

## Sheet: CD14+_Mono_3Mths_vs_Birth
comparison_group	gene_name	p_val	avg_log2FC	pct.1	pct.2	p_val_adj	trend
[truncated: 2,061 more rows]

[truncated: 7 more sheets: γδ_T_DEGs_CD8+_vs_CD8-, Enriched_GO_6_Cell_Type_DEGs, Enriched_GO_CD4+_TN_DEGs, Enriched_GO_CD8+_TN_DEGs, Enriched_GO_CD16hi_NK_DEGs, Enriched_GO_CD14+_Mono_DEGs, Enriched_GO_CD8+_vs_CD8-_γδ_T]
